# Supplementary material for: A Multi-OMIC Characterisation of Biodegradation and Microbial Community Succession Within the PET Plastisphere
Source: Research Square preprint supplement (doi:10.21203/rs.3.rs-104576/v1), 2020-11-13
Supplement: Supplementary file 1 [file 4d03a1837090664fcfa72b7f.xlsx]

## Sheet: Summary
Table S8A: Summary of the metabolomics results obtained by incubating Thioclava sp. BHET1, Bacillus sp. BHET2 and Ideonella sakaiensis with terephthalic acid (TPA), bis(2-hydroxy ethyl) terephthalate (BHET) and amorphous PET as sole carbon sources.
Compound	Log2 Fold change BHET/none			Log2 Fold change TPA/none			Log2 Fold change PET/none			P value BHET/none			P value TPA/none			P value PET/none
	Thioclava sp. BHET1	Bacillus sp. BHET2	Ideonella sakaiensis	Thioclava sp. BHET1	Bacillus sp. BHET2	Ideonella sakaiensis	Thioclava sp. BHET1	Bacillus sp. BHET2	Ideonella sakaiensis	Thioclava sp. BHET1	Bacillus sp. BHET2	Ideonella sakaiensis	Thioclava sp. BHET1	Bacillus sp. BHET2	Ideonella sakaiensis	Thioclava sp. BHET1	Bacillus sp. BHET2	Ideonella sakaiensis
c4, MHET	0.985685	0.228495	2.8603							1.68179e-05	0.0128143	4.56722e-07
c1, BHET	-0.448143	0.180338	-1.19745				4.45596	1.37962	0.91396	0.404646	0.326241	0.00134263				0.043852	0.00431494	0.356746
c5, TPA	-0.143828	4.72975	9.17091	0.361466	0.0392268	-0.201201	-0.0591389	0.0438245	-0.0801876	0.489418	8.85664e-06	6.50646e-07	0.0159825	0.551473	0.0795155	0.843672	0.875238	0.424607
c3	3.07703	-0.245448	3.55234							0.000671401	0.503216	0.000366692
c2	4.97195	0.270963	3.84044							4.55036e-05	0.30462	5.95024e-05

## Sheet: BHET
Table S8B. All metabolomics results obtained for incubations of Thioclava sp. BHET1, Bacillus sp. BHET2 and Ideonella sakaiensis with BHET, including compounds detected, predicted formula of compounds and peak area in each sample.
Name	Predicted Formula	Molecular Weight	RT [min]	Area (Max.)	Area: thio_bhet_R1	Area: thio_bhet_R2	Area: thio_bhet_R3	Area: baci_bhet_R1	Area: baci_bhet_R2	Area: baci_bhet_R3	Area: ideo_bhet_R1	Area: ideo_bhet_R2	Area: ideo_bhet_R3	Area: none_bhet_R1	Area: none_bhet_R2	Area: none_bhet_R3	Group CV [%]: thioclava_bhet	Group CV [%]: bacillus_bhet	Group CV [%]: ideonella_bhet	Group CV [%]: none_bhet	Norm. Area: thio_bhet_R1	Norm. Area: thio_bhet_R2	Norm. Area: thio_bhet_R3	Norm. Area: baci_bhet_R1	Norm. Area: baci_bhet_R2	Norm. Area: baci_bhet_R3	Norm. Area: ideo_bhet_R1	Norm. Area: ideo_bhet_R2	Norm. Area: ideo_bhet_R3	Norm. Area: none_bhet_R1	Norm. Area: none_bhet_R2	Norm. Area: none_bhet_R3	Avg. Norm. Area: thioclava_bhet	Avg. Norm. Area: bacillus_bhet	Avg. Norm. Area: ideonella_bhet	Avg. Norm. Area: none_bhet	SD Norm. Area: thioclava_bhet	SD Norm. Area: bacillus_bhet	SD Norm. Area: ideonella_bhet	SD Norm. Area: none_bhet	Ratio Avg. Norm. Area: thioclava_bhet/none	Ratio Avg. Norm. Area: bacillus_bhet/none	Ratio Avg. Norm. Area: idionella_bhet/none	Log2 Fold Change: thioclava_bhet/none	Log2 Fold Change: bacillus_bhet/none	Log2 Fold Change: idionella_bhet/none	P-value: thioclava_bhet/none	P-value: bacillus_bhet/none	P-value: idionella_bhet/none
c5, TPA	C8 H6 O4	166.026	13.199	1.88984e+08	403346	417892	502353	1.1483e+07	1.28094e+07	1.25167e+07	1.88984e+08	1.72946e+08	1.8285e+08	423931	657696	497076	12.1169	5.67922	4.45634	22.7235	461588	445031	556981	1.35859e+07	1.49371e+07	1.42039e+07	3.28881e+08	2.9873e+08	3.00759e+08	448577	657696	523013	487867	1.42423e+07	3.09456e+08	543095	60424.9	676419	1.68529e+07	105996	0.898308	26.2244	569.801	-0.154719	4.71284	9.15432	0.476849	4.13666e-06	5.86714e-06
c4, MHET	C10 H10 O5	210.052	13.858	8.71251e+08	3.44661e+08	3.56011e+08	3.65203e+08	1.84673e+08	2.06196e+08	2.10349e+08	8.71251e+08	8.13038e+08	8.52533e+08	1.82016e+08	1.96255e+08	1.96065e+08	2.89619	6.87725	3.51443	4.26575	3.94429e+08	3.79132e+08	4.04918e+08	2.18493e+08	2.40447e+08	2.38703e+08	1.51621e+09	1.40436e+09	1.40228e+09	1.92598e+08	1.96255e+08	2.06295e+08	3.92826e+08	2.32548e+08	1.44095e+09	1.98383e+08	1.29674e+07	1.22032e+07	6.51826e+07	7.09216e+06	1.98014	1.17222	7.26348	0.985603	0.229238	2.86066	2.19733e-05	0.0137786	5.13683e-06
c3	C12 H12 O7	268.059	14.316	697659	588359	697659	680009	53025	67152.6	67577.2	582964	583651	602390	125756	68479.4	65460.1	8.95356	13.233	1.86938	39.2464	673315	742967	753956	62735.6	78307.3	76686.3	1.01451e+06	1.00814e+06	990836	133067	68479.4	68875.7	723413	72576.4	1.0045e+06	90140.7	43732.4	8560.86	12250.9	37175.7	8.02538	0.805146	11.1437	3.00457	-0.312677	3.47815	4.41829e-05	0.469842	2.2298e-06
c2	C12 H12 O6	252.064	15.554	438810	300817	438810	423861	15130.2	13920.6	13029.7	110301	114063	115572	13567	10129.2	15985.6	19.5253	7.51618	2.39556	22.249	344253	467308	469954	17901	16232.9	14786	191953	197021	190097	14355.8	10129.2	16819.7	427172	16306.6	193024	13768.2	71821.5	1558.8	3583.89	3383.73	31.0259	1.18437	14.0195	4.9554	0.244116	3.80936	0.000571099	0.303331	3.8044e-07
c1, BHET	C12 H14 O6	254.079	14.123	6.19959e+08	5.19045e+08	5.34143e+08	2.00308e+08	5.80613e+08	4.91961e+08	6.19959e+08	1.31103e+08	1.56359e+08	1.55869e+08	6.18398e+08	4.82151e+08	5.74017e+08	45.1217	11.6209	9.77285	12.449	5.93992e+08	5.68833e+08	2.2209e+08	6.86941e+08	5.7368e+08	7.03526e+08	2.28154e+08	2.70079e+08	2.56379e+08	6.5435e+08	4.82151e+08	6.03969e+08	4.61638e+08	6.54716e+08	2.51538e+08	5.80157e+08	2.07836e+08	7.0667e+07	2.13779e+07	8.85345e+07	0.795713	1.12852	0.433568	-0.32968	0.174426	-1.20567	0.414911	0.317908	0.00334261
		310.052	17.16	588796	469632	559018	588796	3902.55	2513.32	2218.35	3194.81	2531.08	2386.2	2807.62	2439.69	2274.79	11.5028	31.25	15.9449	10.8794	537444	595323	652824	4617.23	2930.81	2517.37	5559.81	4371.95	3924.92	2970.85	2439.69	2393.49	595197	3355.13	4618.89	2601.34	57690.1	1112.38	844.958	320.836	228.804	1.28977	1.77558	7.83797	0.367113	0.82829	5.86428e-05	0.322498	0.0180492
	C17 H22 O5	306.147	16.541	3.04739e+06	17006.3	3.04739e+06	3.04478e+06	12281.4	17998.1	19751.9	13502.2	15542.6	9237.67	19736.3	16018.8	17351.9	85.8793	23.4246	25.2114	10.6389	19461.9	3.24529e+06	3.37589e+06	14530.5	20987.8	22414.4	23497.4	26846.7	15194.5	20883.7	16018.8	18257.3	2.21355e+06	19310.9	21846.2	18386.6	1.90126e+06	4200.97	5999.04	2435.01	120.389	1.05027	1.18816	6.91156	0.0707597	0.248727	0.116143	0.758169	0.407078
	C14 H16 O7	296.09	14.917	1.4734e+06	60077.8	77605.8	71067.3	1359.4	962.194	906.118	1.31696e+06	1.4734e+06	1.42141e+06	2291.82	1524.12	1045.48	12.7296	22.9678	5.67509	38.7994	68752.7	82645.7	78795.5	1608.35	1122.02	1028.26	2.29185e+06	2.54501e+06	2.33799e+06	2425.06	1524.12	1100.03	76731.3	1252.88	2.39162e+06	1683.07	7172.85	311.398	134828	676.665	45.5902	0.744402	1420.99	5.51065	-0.425847	10.4727	5.5484e-05	0.373768	6.70571e-06
	C18 H22 O9	382.127	15.717	516063	31825.2	34588.4	43263.6	2863.49	1527.96	1368.85	436677	516063	452467	1751.14	2042.06	1371.99	16.3253	42.7509	8.97167	19.5153	36420.6	36834.7	47968.3	3387.88	1781.77	1553.37	759933	891397	744236	1852.94	2042.06	1443.58	40407.9	2241.01	798522	1779.53	6550.78	999.766	80813.8	305.918	22.7071	1.25933	448.727	4.50507	0.332653	8.80969	0.000520033	0.487177	6.89804e-05
	C12 H14 O5	238.084	15.152	1.12103e+06	290056	332107	332760	41766.2	36336.1	39432.1	1.07158e+06	1.07146e+06	1.12103e+06	21709.2	26687	23803.4	7.68709	6.95277	2.62717	10.3851	331939	353676	368946	49415	42371.9	44747.3	1.86482e+06	1.85074e+06	1.84391e+06	22971.3	26687	25045.5	351520	45511.4	1.85316e+06	24901.3	18597.2	3583.16	10662.6	1862.06	14.1166	1.82767	74.4203	3.81932	0.870009	6.21763	7.0965e-06	0.000903917	8.18968e-10
	C11 H12 O4	208.073	17.006	511349	84944.3	96708.9	108614	19232.5	20487.5	19497.8	476402	511349	506248	5860.85	7908.23	11382.5	12.2315	3.35071	3.79058	33.2946	97209.8	102990	120425	22754.6	23890.6	22126	829065	883254	832698	6201.59	7908.23	11976.4	106875	22923.7	848339	8695.41	12085.3	894.408	30291.8	2966.79	12.2909	2.6363	97.5617	3.61952	1.39852	6.60824	0.000166088	0.00135381	1.14776e-06
		400.009	14.134	848419	87069.1	52508	44886.6	84874.1	34227.8	38011.6	848419	585110	603815	4725.24	7638.63	4404.45	36.5589	53.8691	21.634	31.8795	99641.4	55918.1	49767.8	100417	39913.4	43135.4	1.47647e+06	1.01066e+06	993179	4999.95	7638.63	4634.27	68442.4	61155.4	1.1601e+06	5757.62	27193.5	34040	274122	1639.23	11.8873	10.6216	201.49	3.57135	3.40894	7.65457	0.0163277	0.0480457	0.00187851
	C11 H12 O5	224.068	15.241	1.22507e+06	290397	345138	400786	32710	36387.7	39246.9	1.12024e+06	1.22507e+06	1.21937e+06	36297.3	32806.3	34039.3	15.9782	9.07377	4.96081	5.14945	332329	367552	444369	38700.2	42432	44537.2	1.94952e+06	2.11606e+06	2.00568e+06	38407.6	32806.3	35815.4	381417	41889.8	2.02375e+06	35676.4	57292.7	2956.02	84730.8	2803.24	10.691	1.17416	56.7252	3.41833	0.231627	5.82592	0.000475635	0.0574782	2.19553e-06
	C24 H22 O11	486.114	14.124	1.15521e+06	59600.8	95994.8	104322	5198.51	4335.06	9784.27	1.11213e+06	1.02296e+06	1.15521e+06	7147.52	12190.3	7789.28	27.451	45.4839	6.15024	30.3572	68206.8	102229	115667	6150.52	5055.16	11103.1	1.9354e+06	1.76695e+06	1.90014e+06	7563.06	12190.3	8195.71	95367.6	7436.28	1.8675e+06	9316.36	24462.7	3222.48	88840.3	2508.93	10.2366	0.798196	200.454	3.35566	-0.325186	7.64713	0.00374123	0.469898	3.47124e-06
	C10 H10 O6	226.048	14.238	482817	152383	197326	175518	18004.4	16144.8	18870.5	431610	482817	421328	25471.8	10320.6	22608.8	12.8372	7.88032	7.39714	41.3487	174387	210141	194605	21301.6	18826.6	21414.2	751116	833971	693018	26952.7	10320.6	23788.5	193044	20514.1	759368	20353.9	17928.4	1462.52	70837.7	8831.96	9.48438	1.00787	37.3082	3.24555	0.0113103	5.22142	0.000116119	0.976759	5.68594e-05
	C18 H14 O8	358.069	16.36	1.25993e+07	2.14534e+06	2.5892e+06	2.72969e+06	429980	442720	450079	6.4735e+06	1.25993e+07	8.97284e+06	351321	311322	350229	12.2593	2.30623	32.9478	6.74858	2.45511e+06	2.75735e+06	3.02653e+06	508724	516260	510748	1.12656e+07	2.17628e+07	1.47589e+07	371746	311322	368504	2.74633e+06	511911	1.59291e+07	350524	285868	3900.48	5.34556e+06	33988.6	7.83494	1.46042	45.4437	2.96992	0.54638	5.50601	0.000134632	0.00122169	0.00724317
		493.231	13.987	2.46736e+06	326824	469406	504217	43104.2	54893.3	57684.8	1.99794e+06	2.46736e+06	2.30459e+06	53547.2	69465.2	64142.2	21.6835	14.9134	10.5624	12.9891	374016	499891	559048	50997.9	64011.6	65460.4	3.47695e+06	4.26188e+06	3.79068e+06	56660.3	69465.2	67489.1	477652	60156.7	3.84317e+06	64538.2	94499.2	7964.71	395086	6893.65	7.40107	0.932109	59.5487	2.88773	-0.101429	5.896	0.00164747	0.511101	7.78258e-05
		380.051	16.364	1.0754e+06	141891	184520	190625	31316.9	32909.4	36991.4	587411	1.0754e+06	819814	26079.3	32571.8	23699.1	15.4053	8.67496	29.4954	16.7302	162379	196504	211354	37052	38376	41977.7	1.02225e+06	1.85754e+06	1.34846e+06	27595.5	32571.8	24935.7	190079	39135.2	1.40942e+06	28367.7	25111.6	2549.11	420970	3876.2	6.70056	1.37957	49.684	2.74428	0.464221	5.63471	0.00038498	0.0158642	0.00473584
		676.393	13.458	1.53716e+06	543878	613699	582679	49197.9	61039.2	60222.3	1.53716e+06	1.50638e+06	1.43372e+06	61343.8	94029.7	141068	6.03058	11.6393	3.55918	40.5579	622411	653554	646042	58207.6	71178.5	68339.9	2.67507e+06	2.60198e+06	2.35823e+06	64910.2	94029.7	148429	640669	65908.7	2.54509e+06	102456	16251.9	6818.69	165900	42392.2	6.2531	0.643286	24.8408	2.64457	-0.636468	4.63464	3.3228e-05	0.214413	1.59248e-05
	C22 H22 O10	446.122	16.216	3.48423e+06	2.68109e+06	3.43849e+06	3.48423e+06	889472	976090	1.04508e+06	1.52025e+06	1.56757e+06	1.66279e+06	684543	659600	661308	14.0904	8.03636	4.58483	2.08446	3.06822e+06	3.6618e+06	3.86313e+06	1.05236e+06	1.13823e+06	1.18595e+06	2.64563e+06	2.70768e+06	2.73503e+06	724341	659600	695815	3.53105e+06	1.12551e+06	2.69611e+06	693252	413268	67695.8	45808.9	32446.9	5.09346	1.62353	3.88908	2.34865	0.699133	1.95943	0.000289687	0.000567839	4.10691e-07
		393.215	13.49	1.97676e+06	567872	550122	512203	90533	85416.6	82432.9	1.97676e+06	1.82331e+06	1.8048e+06	124529	118286	107700	5.23317	4.75644	5.05227	7.28158	649870	585849	567903	107113	99605.2	93544.5	3.44008e+06	3.1494e+06	2.96861e+06	131769	118286	113319	601207	100087	3.18603e+06	121125	43088.1	6796.86	237858	9546.89	4.96353	0.826316	26.3037	2.31137	-0.275235	4.71719	4.67293e-05	0.0358982	2.39394e-05
	C9 H8 O4	180.042	15.242	6.04975e+06	4.33076e+06	6.04975e+06	5.90013e+06	1.8855e+06	1.83899e+06	1.8722e+06	186781	198131	188582	1.63081e+06	1.63133e+06	1.41974e+06	17.5462	1.2841	3.19079	7.81801	4.95609e+06	6.44264e+06	6.54174e+06	2.23079e+06	2.14446e+06	2.12456e+06	325048	342231	310188	1.72562e+06	1.63133e+06	1.49382e+06	5.98016e+06	2.16661e+06	325822	1.61693e+06	888249	56471.1	16035.9	116567	3.69847	1.33995	0.201507	1.88693	0.422183	-2.3111	0.00108148	0.00182438	4.5152e-05
		248.03	15.241	1.00005e+06	577691	964847	1.00005e+06	224456	345661	372154	28837.5	31909.4	37773.5	224707	288631	264482	27.6509	25.0717	13.8249	12.4497	661107	1.02751e+06	1.1088e+06	265561	403078	422319	50184.8	55117.1	62131.3	237771	288631	278283	932473	363653	55811.1	268228	238500	85492.9	6003.41	26879.4	3.47642	1.35576	0.208073	1.7976	0.439101	-2.26484	0.00868877	0.138911	0.000181576
		322.067	14.128	2.85638e+06	852304	1.4345e+06	1.32295e+06	247110	340076	341995	2.35714e+06	2.4813e+06	2.85638e+06	321537	391716	402664	25.6808	17.511	10.1335	11.8342	975373	1.52766e+06	1.46682e+06	292364	396566	388095	4.10204e+06	4.28595e+06	4.69828e+06	340230	391716	423675	1.32328e+06	359008	4.36209e+06	385207	302831	57870.9	305329	42101.3	3.43525	0.931989	11.324	1.78042	-0.101616	3.50131	0.00602891	0.560487	2.37352e-05
		434.249	14.108	649109	395672	559491	610205	308226	358349	177561	551613	649109	603973	169135	180169	163874	21.4887	33.171	8.11095	4.86156	452805	595826	676561	364672	417874	201495	959952	1.12121e+06	993439	178968	180169	172425	575064	328014	1.02487e+06	177187	113314	112751	85097.5	4167.78	3.24552	1.85123	5.78408	1.69845	0.888481	2.53209	0.00370371	0.0815496	6.65343e-05
	C14 H26 O6	290.172	16.513	4.04536e+06	2.8988e+06	3.91701e+06	4.04536e+06	1.91005e+06	2.18578e+06	2.22045e+06	748084	1.03662e+06	1.03975e+06	1.20852e+06	1.39033e+06	1.34771e+06	17.3517	8.07845	17.7907	7.22786	3.31738e+06	4.17139e+06	4.48527e+06	2.25984e+06	2.54886e+06	2.51976e+06	1.30186e+06	1.79056e+06	1.71022e+06	1.27878e+06	1.39033e+06	1.41803e+06	3.99135e+06	2.44282e+06	1.60088e+06	1.36238e+06	604406	159130	262054	73712.8	2.92969	1.79306	1.17506	1.55075	0.84242	0.232739	0.00170936	0.000436868	0.203745
		346.025	13.853	4.99653e+06	1.8161e+06	942216	701524	629434	616632	375759	4.99653e+06	2.43438e+06	1.25165e+06	541981	530687	298508	50.8548	26.4345	66.1436	30.0673	2.07833e+06	1.00341e+06	777811	744704	719061	426410	8.69528e+06	4.2049e+06	2.05876e+06	573491	530687	314084	1.28652e+06	630058	4.98631e+06	472754	694948	176830	3.38656e+06	139069	2.72133	1.33274	10.5474	1.44431	0.414396	3.39881	0.117619	0.292509	0.0823477
		121.089	1.495	1.49115e+07	1.49115e+07	2.74166e+06	1.73684e+06	6.03232e+06	1.89571e+06	1.25451e+06	5.91489e+06	2.64989e+06	1.57341e+06	4.63389e+06	2.14451e+06	1.38776e+06	113.464	84.7237	66.8997	62.3934	1.70647e+07	2.91971e+06	1.92572e+06	7.13703e+06	2.21061e+06	1.42362e+06	1.02935e+07	4.57716e+06	2.58801e+06	4.90329e+06	2.14451e+06	1.46018e+06	7.30337e+06	3.59042e+06	5.81955e+06	2.83599e+06	8.46814e+06	3.09656e+06	4.00014e+06	1.82274e+06	2.57524	1.26602	2.05203	1.36471	0.340298	1.03705	0.422191	0.734517	0.304958
		354.003	14.131	1.33843e+06	488117	274034	121269	173393	118336	125528	1.33843e+06	565734	418355	143010	152339	122247	62.5781	21.5176	63.8338	11.066	558599	291831	134457	205147	137993	142448	2.32921e+06	977195	688127	151324	152339	128626	328296	161863	1.33151e+06	144096	214409	37551.2	876040	13407.4	2.27831	1.12329	9.24042	1.18796	0.167735	3.20796	0.211693	0.483324	0.0787381
		122.036	14.088	6.29529e+06	4.53853e+06	4.33337e+06	3.46918e+06	1.86697e+06	1.6047e+06	1.44323e+06	6.29529e+06	5.93725e+06	5.72204e+06	2.13073e+06	1.76956e+06	1.88793e+06	13.7957	13.0537	4.83847	9.54289	5.19388e+06	4.6148e+06	3.84644e+06	2.20887e+06	1.87125e+06	1.63777e+06	1.09555e+07	1.02554e+07	9.41184e+06	2.2546e+06	1.76956e+06	1.98644e+06	4.5517e+06	1.90597e+06	1.02076e+07	2.00354e+06	675932	287127	772922	242973	2.27183	0.951301	5.09478	1.18386	-0.0720259	2.34902	0.00355731	0.676488	6.2064e-05
		266.156	15.935	1.7642e+07	1.7642e+07	1.04233e+07	1.45331e+07	8.9496e+06	5.57448e+06	8.94603e+06	7.26074e+06	5.96921e+06	7.69582e+06	6.80198e+06	6.36406e+06	8.09918e+06	25.5002	24.8946	12.8742	12.7296	2.01894e+07	1.11002e+07	1.61135e+07	1.05886e+07	6.50046e+06	1.01519e+07	1.26356e+07	1.03106e+07	1.26584e+07	7.19743e+06	6.36406e+06	8.52179e+06	1.5801e+07	9.08031e+06	1.18682e+07	7.36109e+06	4.55263e+06	2.24486e+06	1.34895e+06	1.08813e+06	2.14656	1.23355	1.61229	1.10203	0.302821	0.689111	0.0354232	0.298568	0.0107866
		520.03	13.863	9.21794e+06	7.4702e+06	4.18607e+06	3.67806e+06	3.87569e+06	2.86231e+06	2.18152e+06	9.21794e+06	5.8368e+06	5.3677e+06	2.89772e+06	2.63231e+06	2.18694e+06	40.2719	28.6734	30.858	13.9628	8.54886e+06	4.45792e+06	4.07804e+06	4.58545e+06	3.33777e+06	2.47558e+06	1.60416e+07	1.00819e+07	8.82901e+06	3.06619e+06	2.63231e+06	2.30105e+06	5.69494e+06	3.46627e+06	1.16509e+07	2.66652e+06	2.47885e+06	1.06079e+06	3.85379e+06	383713	2.13572	1.29992	4.36931	1.09472	0.378425	2.12741	0.104695	0.28678	0.0158899
		186.119	16.628	799502	436950	517837	538803	54225.1	75336.4	50436.4	677332	724626	799502	259470	267915	221058	10.803	22.3615	8.39461	10.0107	500043	551467	597395	64155.5	87850.6	57234.9	1.17874e+06	1.25165e+06	1.31505e+06	274555	267915	232592	549635	69747	1.24848e+06	258354	48702	16055.5	68213.1	22556.1	2.12745	0.269967	4.83244	1.08912	-1.88915	2.27275	0.000713787	0.000295289	1.82678e-05
		908.875	16.047	2.97136e+06	2.6818e+06	549475	634586	2.97136e+06	247082	365686	1.0236e+06	630011	622335	970870	470381	563534	93.6878	128.882	30.2494	39.8307	3.06904e+06	585160	703594	3.51551e+06	288124	414979	1.78133e+06	1.08822e+06	1.02364e+06	1.02731e+06	470381	592939	1.4526e+06	1.4062e+06	1.29773e+06	696878	1.40113e+06	1.82781e+06	420055	292654	2.08444	2.01786	1.86221	1.05966	1.01283	0.897015	0.412207	0.543176	0.111851
		266.156	15.705	1.85239e+07	1.85239e+07	1.25823e+07	1.30939e+07	1.36583e+07	5.84029e+06	5.48722e+06	1.10767e+07	7.39024e+06	4.963e+06	9.62689e+06	9.66804e+06	3.71968e+06	22.3481	55.4596	39.4163	44.6126	2.11986e+07	1.33995e+07	1.45178e+07	1.61595e+07	6.81042e+06	6.22687e+06	1.92765e+07	1.27652e+07	8.16335e+06	1.01866e+07	9.66804e+06	3.91377e+06	1.6372e+07	9.73227e+06	1.34017e+07	7.92279e+06	4.21725e+06	5.5738e+06	5.58383e+06	3.48159e+06	2.06644	1.22839	1.69153	1.04715	0.296767	0.758331	0.0554568	0.658318	0.222726
	C9 H10 O3	166.062	13.863	1.58099e+06	425091	552814	557216	215679	256149	244590	1.17563e+06	1.58099e+06	1.14749e+06	262051	286257	252264	14.6654	8.72918	18.6394	6.55753	486472	588716	617811	255177	298698	277560	2.0459e+06	2.73085e+06	1.88744e+06	277286	286257	265426	564333	277145	2.2214e+06	276323	68980.9	21763.7	448257	10448.8	2.04229	1.00297	8.03913	1.03019	0.00428422	3.00704	0.00202435	0.955813	0.00167928
		211.056	13.857	9.5001e+07	3.64968e+07	4.04902e+07	4.26567e+07	1.87132e+07	2.08015e+07	2.09128e+07	8.43666e+07	9.37436e+07	9.5001e+07	1.9919e+07	2.12964e+07	2.146e+07	7.83524	6.15153	6.38301	4.05167	4.17667e+07	4.31198e+07	4.72954e+07	2.21401e+07	2.42568e+07	2.37317e+07	1.4682e+08	1.61924e+08	1.56261e+08	2.1077e+07	2.12964e+07	2.25798e+07	4.40606e+07	2.33762e+07	1.55002e+08	2.16511e+07	2.88191e+06	1.10221e+06	7.63011e+06	811744	2.03503	1.07968	7.15908	1.02505	0.110603	2.83977	0.000204258	0.0944422	7.255e-06
	C20 H14 O10	414.061	13.878	1.86007e+06	635907	474411	258955	280503	143688	97896.5	1.86007e+06	809427	554162	464966	133152	120721	41.4349	54.5937	64.4124	81.4898	727729	505221	287115	331872	167556	111092	3.237e+06	1.39812e+06	911508	491998	133152	127020	506688	203507	1.84888e+06	250724	220311	114696	1.22653e+06	208972	2.0209	0.811678	7.37418	1.015	-0.301021	2.88248	0.218063	0.748815	0.0901311
		355.983	13.885	7.35807e+06	7.35807e+06	2.90433e+06	2.59382e+06	3.98138e+06	2.25624e+06	2.06207e+06	6.07191e+06	4.37889e+06	3.67921e+06	2.59292e+06	2.18186e+06	2.11744e+06	62.2002	38.1894	26.1196	11.2275	8.42054e+06	3.09295e+06	2.87588e+06	4.71049e+06	2.63102e+06	2.34002e+06	1.05667e+07	7.56367e+06	6.05171e+06	2.74367e+06	2.18186e+06	2.22793e+06	4.79646e+06	3.22718e+06	8.0607e+06	2.38449e+06	3.14043e+06	1.2928e+06	2.29818e+06	311914	2.01153	1.35341	3.38048	1.00829	0.436595	1.75723	0.256164	0.334046	0.0132732
		95.9869	1.497	1.75509e+07	1.03517e+07	1.68764e+07	7.5441e+06	1.22773e+07	8.05822e+06	5.28584e+06	6.10198e+06	1.75509e+07	1.45955e+07	1.41653e+06	8.3171e+06	9.12257e+06	41.3084	41.2224	46.6178	67.3904	1.18464e+07	1.79724e+07	8.36448e+06	1.45256e+07	9.39677e+06	5.99834e+06	1.06191e+07	3.03158e+07	2.40072e+07	1.49888e+06	8.3171e+06	9.59858e+06	1.27278e+07	9.97359e+06	2.16474e+07	6.47152e+06	4.86423e+06	4.29281e+06	1.00582e+07	4.35384e+06	1.96674	1.54115	3.34502	0.975803	0.624008	1.74201	0.17227	0.37732	0.0744949
		266.156	15.77	1.94381e+07	1.94381e+07	1.25823e+07	1.39822e+07	1.19398e+07	5.84029e+06	7.02926e+06	9.79153e+06	7.39024e+06	7.14429e+06	8.83689e+06	9.66804e+06	6.99637e+06	23.6225	39.0995	18.037	16.0844	2.22449e+07	1.33995e+07	1.55027e+07	1.41264e+07	6.81042e+06	7.97677e+06	1.70398e+07	1.27652e+07	1.17512e+07	9.35065e+06	9.66804e+06	7.36143e+06	1.7049e+07	9.63785e+06	1.38521e+07	8.79337e+06	4.62099e+06	3.93066e+06	2.80685e+06	1.25021e+06	1.93885	1.09604	1.57529	0.955201	0.132294	0.655614	0.0404572	0.740786	0.046323
		117.079	13.872	960275	434227	495503	548427	227314	288870	328807	960275	945996	861954	240435	284892	312923	11.5991	18.1523	5.75735	13.0819	496927	527683	608066	268943	336855	373128	1.67113e+06	1.63402e+06	1.41778e+06	254413	284892	329250	544225	326309	1.57431e+06	289519	57386.5	52887.4	136825	37632.6	1.87976	1.12707	5.43768	0.910548	0.172581	2.44299	0.00301079	0.381828	9.65834e-05
		239.044	18.391	7.98476e+06	4.85222e+06	5.17582e+06	5.58703e+06	2.4044e+06	2.21959e+06	2.13608e+06	7.47395e+06	7.73751e+06	7.98476e+06	2.76324e+06	3.14559e+06	3.00982e+06	7.07535	6.09355	3.30375	6.52	5.55286e+06	5.51196e+06	6.19459e+06	2.84473e+06	2.58829e+06	2.42402e+06	1.30067e+07	1.3365e+07	1.31337e+07	2.92389e+06	3.14559e+06	3.16687e+06	5.75314e+06	2.61901e+06	1.31684e+07	3.07879e+06	382859	212029	181696	134562	1.86864	0.850663	4.27715	0.901987	-0.23334	2.09665	0.000336092	0.0338203	1.67921e-07
		140.951	13.855	7.62213e+06	3.10712e+06	1.9572e+06	1.16388e+06	2.06012e+06	613041	373242	7.62213e+06	2.65468e+06	1.60475e+06	1.97913e+06	958293	627620	47.063	89.8704	81.1561	59.285	3.55577e+06	2.08431e+06	1.29044e+06	2.43739e+06	714873	423554	1.32645e+07	4.58544e+06	2.63956e+06	2.09419e+06	958293	660369	2.31018e+06	1.19194e+06	6.82984e+06	1.23762e+06	1.14943e+06	1.08838e+06	5.65689e+06	756622	1.86663	0.963093	5.51854	0.900438	-0.0542535	2.46429	0.248355	0.955269	0.164907
		101.121	1.515	8.91662e+06	8.91662e+06	2.75404e+06	1.32162e+06	5.3101e+06	1.76035e+06	1.08779e+06	6.22637e+06	2.14382e+06	1.26058e+06	4.4731e+06	1.89431e+06	1.15648e+06	93.1831	83.4246	82.5199	69.4341	1.02041e+07	2.9329e+06	1.46534e+06	6.28254e+06	2.05276e+06	1.23442e+06	1.08355e+07	3.70303e+06	2.07345e+06	4.73316e+06	1.89431e+06	1.21683e+06	4.86746e+06	3.18991e+06	5.53734e+06	2.61477e+06	4.67959e+06	2.70937e+06	4.66015e+06	1.86559e+06	1.86153	1.21996	2.11772	0.896486	0.286833	1.08251	0.481865	0.777115	0.370296
		122.036	13.858	4.24305e+07	1.33069e+07	1.48394e+07	1.66149e+07	7.22126e+06	8.07055e+06	7.53928e+06	3.93304e+07	4.24305e+07	3.98787e+07	8.22427e+06	8.88714e+06	9.39395e+06	11.0956	5.63821	4.08027	6.63907	1.52283e+07	1.58031e+07	1.84217e+07	8.5437e+06	9.41115e+06	8.55554e+06	6.84453e+07	7.32903e+07	6.55942e+07	8.70242e+06	8.88714e+06	9.88412e+06	1.64844e+07	8.8368e+06	6.91099e+07	9.15789e+06	1.70219e+06	497444	3.89087e+06	635675	1.80002	0.964938	7.54649	0.848012	-0.0514919	2.91581	0.00221114	0.528701	1.2348e-05
	C8 H4 O3	148.016	13.868	2.04983e+07	7.83576e+06	7.07979e+06	7.74661e+06	3.57116e+06	4.79962e+06	4.31607e+06	1.8318e+07	2.02022e+07	2.04983e+07	4.02859e+06	4.98776e+06	4.83006e+06	5.46904	14.6336	6.01151	11.1437	8.9672e+06	7.53958e+06	8.58902e+06	4.22516e+06	5.59689e+06	4.89786e+06	3.18781e+07	3.48953e+07	3.37164e+07	4.2628e+06	4.98776e+06	5.08208e+06	8.36527e+06	4.90663e+06	3.34966e+07	4.77755e+06	739645	685908	1.52057e+06	448272	1.75095	1.02702	7.01125	0.808141	0.0384638	2.80967	0.00198775	0.798464	6.1476e-06
	C7 H4 O2	120.021	13.867	1.61851e+06	515130	480965	618040	231110	353666	358822	1.3463e+06	1.44134e+06	1.61851e+06	285155	348964	358978	13.2614	22.9841	9.40638	12.0972	589512	512201	685249	273433	412414	407189	2.34292e+06	2.48963e+06	2.66219e+06	301733	348964	377709	595654	364345	2.49825e+06	342802	86687.2	78775.6	159809	38361.2	1.7376	1.06284	7.28773	0.797099	0.087931	2.86547	0.00988143	0.692121	2.22449e-05
		106.952	1.012	1.47557e+06	1.47557e+06	1.15471e+06	1.17662e+06	1.05219e+06	1.06543e+06	1.09808e+06	1.28526e+06	1.31016e+06	1.12774e+06	806614	525058	1.01384e+06	14.1263	2.20344	7.97065	31.3789	1.68864e+06	1.2297e+06	1.30458e+06	1.24488e+06	1.24241e+06	1.2461e+06	2.23669e+06	2.26304e+06	1.85495e+06	853508	525058	1.06674e+06	1.40764e+06	1.24446e+06	2.11822e+06	815103	246215	1881.51	228386	272877	1.72695	1.52675	2.59872	0.788224	0.610468	1.3778	0.0491924	0.0527012	0.00316405
		337.121	13.887	3.24544e+06	1.8636e+06	2.81297e+06	2.70978e+06	878877	1.54291e+06	1.61125e+06	2.70781e+06	3.24544e+06	3.21775e+06	1.45687e+06	1.46551e+06	1.62247e+06	21.1562	30.0931	9.90256	6.15333	2.13269e+06	2.99565e+06	3.00445e+06	1.03983e+06	1.79921e+06	1.82844e+06	4.71231e+06	5.60585e+06	5.29268e+06	1.54156e+06	1.46551e+06	1.70713e+06	2.71093e+06	1.55583e+06	5.20361e+06	1.5714e+06	500789	447107	453382	123545	1.72517	0.990088	3.31145	0.786738	-0.0143714	1.72746	0.0186738	0.956411	0.000180016
		582.387	13.512	522648	443843	522648	389722	191360	214872	216970	291305	238271	250240	286903	298331	277155	14.7861	6.84482	10.7008	3.68713	507932	556591	432103	226404	250564	246217	506948	411565	411605	303583	298331	291616	498875	241062	443373	297843	62736.1	12878.6	55057.5	5998.26	1.67496	0.809358	1.48861	0.744126	-0.305151	0.573967	0.00524161	0.00228537	0.0104075
		181.978	13.853	4.88041e+06	2.19466e+06	1.32181e+06	907979	1.71376e+06	439875	261171	4.88041e+06	1.89266e+06	1.13329e+06	1.51409e+06	800664	521470	44.5375	98.4079	75.164	54.1456	2.51156e+06	1.40765e+06	1.00672e+06	2.0276e+06	512943	296375	8.4932e+06	3.2692e+06	1.86409e+06	1.60212e+06	800664	548680	1.64198e+06	945639	4.54217e+06	983821	779308	943241	3.49308e+06	550085	1.66898	0.96119	4.61686	0.738966	-0.0571067	2.20691	0.298074	0.95461	0.156301
		254.93	1.016	1.47557e+06	1.47557e+06	1.15471e+06	1.17662e+06	1.05219e+06	1.06543e+06	1.09808e+06	1.28526e+06	1.31016e+06	1.12774e+06	924165	525058	1.01384e+06	14.1263	2.20344	7.97065	31.6928	1.68864e+06	1.2297e+06	1.30458e+06	1.24488e+06	1.24241e+06	1.2461e+06	2.23669e+06	2.26304e+06	1.85495e+06	977894	525058	1.06674e+06	1.40764e+06	1.24446e+06	2.11822e+06	856565	246215	1881.51	228386	290510	1.64335	1.45285	2.47293	0.716644	0.538888	1.30622	0.0663076	0.0817954	0.00409444
		191.969	1.03	1.78325e+07	1.78325e+07	9.285e+06	9.97494e+06	7.42545e+06	1.153e+07	7.37775e+06	1.52106e+07	9.14659e+06	9.3327e+06	8.3758e+06	8.20353e+06	8.3038e+06	38.4038	27.1558	30.7086	1.04312	2.04075e+07	9.888e+06	1.10597e+07	8.78528e+06	1.34453e+07	8.37224e+06	2.64704e+07	1.57989e+07	1.53508e+07	8.86275e+06	8.20353e+06	8.73708e+06	1.3785e+07	1.02009e+07	1.92067e+07	8.60112e+06	5.76503e+06	2.81726e+06	6.29452e+06	350009	1.6027	1.186	2.23305	0.680508	0.246105	1.15901	0.195013	0.384302	0.0435115
		352.092	13.893	1.4228e+06	647676	758484	975014	319608	529748	535081	1.04159e+06	1.12078e+06	1.4228e+06	447036	515850	641576	20.9758	26.6303	16.8329	18.445	741197	807743	1.08104e+06	378138	617745	607208	1.81265e+06	1.93593e+06	2.34027e+06	473026	515850	675053	876661	534364	2.02962e+06	554643	180100	135398	276008	106454	1.58059	0.963437	3.65932	0.66046	-0.0537378	1.87158	0.0560387	0.848359	0.000988682
		379.952	14.148	1.3707e+06	6055.44	5109.65	5257.69	3908.87	3440.16	3272.19	1.0817e+06	1.20394e+06	1.3707e+06	4242.43	3797.33	3321.62	9.29319	9.31999	11.9031	12.1595	6929.82	5441.49	5829.44	4624.7	4011.6	3713.26	1.88244e+06	2.07957e+06	2.25458e+06	4489.08	3797.33	3494.93	6066.92	4116.52	2.0722e+06	3927.11	772.062	464.69	186183	509.622	1.54488	1.04823	527.664	0.627494	0.0679566	9.04348	0.0160451	0.659116	4.30003e-05
	C22 H18 O10	442.088	13.873	1.98298e+07	8.85076e+06	1.19232e+07	1.13405e+07	5.98429e+06	7.82942e+06	7.47043e+06	1.98298e+07	1.76845e+07	1.66735e+07	7.86048e+06	7.34498e+06	6.95257e+06	15.2442	13.7887	8.92302	6.16494	1.01288e+07	1.26975e+07	1.25737e+07	7.0802e+06	9.12997e+06	8.47741e+06	3.4509e+07	3.05465e+07	2.74253e+07	8.31747e+06	7.34498e+06	7.31535e+06	1.18e+07	8.22919e+06	3.0827e+07	7.65927e+06	1.44864e+06	1.04719e+06	3.55018e+06	570215	1.54062	1.07441	4.02479	0.623508	0.103545	2.00891	0.00997987	0.454271	0.000366949
		208.119	13.898	916224	453109	590508	662756	333404	540320	545365	684861	916224	856071	361641	382709	442915	18.7235	25.5683	14.6562	10.6576	518535	628858	734827	394461	630073	618877	1.19184e+06	1.5826e+06	1.4081e+06	382666	382709	466025	627407	547804	1.39418e+06	410467	108153	132916	195750	48115.1	1.52852	1.33459	3.39657	0.612136	0.416394	1.76408	0.0337188	0.167705	0.0010733
		345.955	13.977	1.58151e+06	956357	585976	511798	1.02347e+06	490024	521658	1.58151e+06	502370	471354	518972	469281	459345	34.7824	44.1157	74.2223	6.62045	1.09445e+06	624032	567454	1.21091e+06	571421	591975	2.75224e+06	867745	775302	549144	469281	483313	761979	791434	1.4651e+06	500579	289315	363418	1.11566e+06	42639.1	1.52219	1.58104	2.9268	0.606152	0.66087	1.54932	0.196491	0.240619	0.208908
		329.855	1.02	2.16053e+06	2.16053e+06	1.92129e+06	1.69635e+06	1.28773e+06	1.10523e+06	1.26976e+06	1.74004e+06	1.62848e+06	1.5461e+06	1.38821e+06	1.36655e+06	1.33538e+06	12.0519	8.23842	5.94152	1.94789	2.4725e+06	2.04607e+06	1.88082e+06	1.52355e+06	1.28881e+06	1.44092e+06	3.02812e+06	2.81288e+06	2.54308e+06	1.46891e+06	1.36655e+06	1.40506e+06	2.13313e+06	1.41776e+06	2.7947e+06	1.41351e+06	305296	119069	243030	51702.8	1.50911	1.00301	1.97714	0.593695	0.00433666	0.983414	0.015794	0.957445	0.000650696
	C25 H32 O12	524.189	13.892	1.06542e+07	5.96715e+06	9.03894e+06	9.02805e+06	3.82257e+06	5.21227e+06	5.50303e+06	1.03927e+07	1.06542e+07	1.02135e+07	5.36228e+06	6.1844e+06	5.43542e+06	22.0981	18.5335	2.12692	8.03804	6.82878e+06	9.62596e+06	1.00098e+07	4.52261e+06	6.07808e+06	6.24482e+06	1.8086e+07	1.8403e+07	1.67996e+07	5.67403e+06	6.1844e+06	5.71904e+06	8.82152e+06	5.61517e+06	1.77629e+07	5.85916e+06	1.7364e+06	949854	849164	282568	1.5056	0.958358	3.03164	0.590334	-0.0613633	1.6001	0.0433919	0.691737	2.10342e-05
		310.182	17.17	1.2157e+07	4.40347e+06	3.13675e+06	2.42628e+06	1.2157e+07	2.58239e+06	2.48237e+06	6.01415e+06	2.48298e+06	2.4882e+06	4.49802e+06	2.49467e+06	136469	30.1475	96.802	55.6347	91.8697	5.03931e+06	3.34046e+06	2.69013e+06	1.43834e+07	3.01136e+06	2.81698e+06	1.04662e+07	4.28886e+06	4.09269e+06	4.75952e+06	2.49467e+06	143590	3.68996e+06	6.73723e+06	6.28259e+06	2.46593e+06	1.21296e+06	6.62245e+06	3.62445e+06	2.3081e+06	1.49638	2.73213	2.54776	0.581476	1.45003	1.34923	0.461785	0.350976	0.198767
		562.076	14.104	4.57156e+06	4.57156e+06	2.30958e+06	1.13929e+06	4.51876e+06	2.15439e+06	1.13113e+06	355170	171659	105187	3.92868e+06	1.43395e+06	417668	65.2644	66.7901	61.459	93.7654	5.23167e+06	2.45957e+06	1.26318e+06	5.34629e+06	2.51226e+06	1.2836e+06	618089	296508	173016	4.15708e+06	1.43395e+06	439462	2.98481e+06	3.04738e+06	362538	2.01016e+06	2.03571e+06	2.08354e+06	229766	1.92463e+06	1.48486	1.51599	0.180352	0.570325	0.600256	-2.47111	0.579279	0.560897	0.214919
	C15 H22 O7	314.136	13.891	4.39164e+07	1.99921e+07	2.72278e+07	2.79857e+07	1.29245e+07	1.76195e+07	1.57945e+07	3.03881e+07	4.05746e+07	4.39164e+07	1.65636e+07	1.80891e+07	1.97248e+07	17.6022	15.3228	18.4024	8.72198	2.28789e+07	2.89961e+07	3.1029e+07	1.52914e+07	2.05463e+07	1.79235e+07	5.28833e+07	7.00847e+07	7.22354e+07	1.75265e+07	1.80891e+07	2.0754e+07	2.76347e+07	1.79204e+07	6.50678e+07	1.87899e+07	4.24221e+06	2.62743e+06	1.06068e+07	1.72409e+06	1.47072	0.953728	3.46292	0.556526	-0.0683502	1.79199	0.0286882	0.656819	0.00172612
		347.85	1.299	1.59243e+06	1.49535e+06	645586	322021	1.59243e+06	578016	336403	1.10959e+06	429082	287638	1.09138e+06	384025	321367	73.8149	79.7569	72.1868	71.3996	1.71127e+06	687513	357040	1.88406e+06	674031	381749	1.93098e+06	741154	473119	1.15483e+06	384025	338136	918607	979947	1.04842e+06	625665	706072	796507	775983	458847	1.46821	1.56625	1.67569	0.554058	0.647313	0.744753	0.579299	0.540955	0.462225
		603.103	14.107	3.73414e+06	3.73414e+06	1.74512e+06	822166	3.66912e+06	1.66023e+06	869702	115424	66320.7	21096.8	3.24302e+06	1.1839e+06	191092	70.8485	69.8439	69.7741	101.128	4.27333e+06	1.85845e+06	911573	4.34105e+06	1.93601e+06	986934	200868	114556	34700.9	3.43157e+06	1.1839e+06	201063	2.34778e+06	2.42133e+06	116708	1.60551e+06	1.73347e+06	1.72892e+06	83104.7	1.65601e+06	1.46233	1.50814	0.0726925	0.548269	0.592769	-3.78205	0.620198	0.586769	0.194873
		171.949	14.116	1.21812e+07	1.21812e+07	6.66296e+06	2.8581e+06	1.20898e+07	5.01823e+06	2.69688e+06	577431	211345	165582	1.00029e+07	4.03031e+06	2.06835e+06	64.8006	74.1112	70.9587	77.0003	1.39402e+07	7.09567e+06	3.16891e+06	1.43038e+07	5.8518e+06	3.06041e+06	1.00488e+06	365056	272356	1.05844e+07	4.03031e+06	2.17628e+06	8.06825e+06	7.73867e+06	547432	5.597e+06	5.45109e+06	5.85437e+06	398866	4.4176e+06	1.44153	1.38265	0.097808	0.5276	0.467431	-3.3539	0.574788	0.639607	0.11992
		307.924	1.448	1.50818e+07	1.4069e+07	7.3589e+06	4.24233e+06	1.50818e+07	4.55565e+06	4.48864e+06	1.44596e+07	4.04907e+06	4.29995e+06	1.3527e+07	1.71637e+06	3.78246e+06	58.6865	75.8108	78.1208	99.4586	1.61005e+07	7.83681e+06	4.70366e+06	1.78438e+07	5.31239e+06	5.09368e+06	2.51635e+07	6.99397e+06	7.07273e+06	1.43134e+07	1.71637e+06	3.97982e+06	9.54699e+06	9.41662e+06	1.30767e+07	6.66987e+06	5.88774e+06	7.29897e+06	1.04675e+07	6.71555e+06	1.43136	1.41182	1.96057	0.517388	0.497552	0.971273	0.606614	0.656511	0.422665
		231.162	14.233	648357	49664.4	69326.5	61220.1	68279.8	62850.6	72447.6	648357	636332	621570	44153.8	46564.1	43432.4	16.4496	7.09154	2.11148	3.66752	56835.7	73828.8	67877.5	80784	73290.7	82213.2	1.12831e+06	1.09914e+06	1.02238e+06	46720.8	46564.1	45698.7	66180.7	78762.6	1.08328e+06	46327.9	8622.66	4792.39	54716.4	550.516	1.42853	1.70011	23.3829	0.51453	0.765631	4.54738	0.0164043	0.000310748	5.13749e-06
		186.137	13.882	1.72758e+06	981163	1.15655e+06	1.2369e+06	860226	1.1193e+06	1.11872e+06	1.22038e+06	1.54095e+06	1.72758e+06	826053	802766	910770	11.6262	14.4673	17.1443	6.71432	1.12284e+06	1.23166e+06	1.37141e+06	1.01776e+06	1.30523e+06	1.26952e+06	2.12379e+06	2.66169e+06	2.8416e+06	874078	802766	958292	1.24197e+06	1.1975e+06	2.54236e+06	878379	124605	156683	373488	77852.2	1.41393	1.36331	2.89438	0.499714	0.447115	1.53325	0.0127846	0.0342078	0.00164536
		398.03	14.308	2.07826e+06	2.07826e+06	1.18866e+06	688748	1.69962e+06	1.00509e+06	652705	423984	235526	157880	1.64928e+06	809243	550706	53.3769	47.5984	50.2246	57.2604	2.37835e+06	1.26586e+06	763646	2.01087e+06	1.17205e+06	740687	737845	406824	259687	1.74517e+06	809243	579441	1.46929e+06	1.30787e+06	468119	1.04462e+06	826352	645893	244901	617479	1.40653	1.25201	0.448125	0.492141	0.324243	-1.15803	0.515213	0.636727	0.207218
		375.298	16.964	2.80746e+06	21486.8	1.45121e+06	1.38338e+06	1.3577e+06	1.56785e+06	1.53075e+06	2.67812e+06	2.43468e+06	2.80746e+06	705933	773838	657267	84.7229	7.55091	7.16944	8.2192	24589.4	1.54546e+06	1.53382e+06	1.60634e+06	1.82829e+06	1.73708e+06	4.66063e+06	4.20543e+06	4.61783e+06	746974	773838	691563	1.03462e+06	1.7239e+06	4.49463e+06	737458	874734	111560	251369	41954.7	1.40296	2.33763	6.09476	0.488473	1.22505	2.60757	0.588287	0.000137589	1.39686e-05
		347.891	1.029	3.34814e+06	3.34814e+06	2.72478e+06	2.6717e+06	1.85294e+06	1.64937e+06	1.8737e+06	2.54767e+06	2.46504e+06	2.62706e+06	2.34822e+06	2.19483e+06	2.12685e+06	12.9047	6.91718	3.18135	5.10032	3.8316e+06	2.90174e+06	2.96224e+06	2.19227e+06	1.92335e+06	2.12626e+06	4.43361e+06	4.25787e+06	4.32109e+06	2.48474e+06	2.19483e+06	2.23783e+06	3.23186e+06	2.08063e+06	4.33752e+06	2.3058e+06	520269	140148	89019.3	156451	1.40162	0.902346	1.88114	0.487097	-0.148247	0.911605	0.0418701	0.136909	4.03679e-05
		281.87	1.018	1.6289e+06	1.6289e+06	1.12967e+06	1.06798e+06	785781	729319	705042	966193	981092	938888	903815	1.15984e+06	892709	24.1147	5.59756	2.22478	15.3355	1.8641e+06	1.20304e+06	1.18412e+06	929682	850466	800079	1.68143e+06	1.69464e+06	1.54432e+06	956361	1.15984e+06	939290	1.41709e+06	860075	1.64013e+06	1.0185e+06	387243	65333.8	83236.8	122704	1.39135	0.844456	1.61034	0.476486	-0.243906	0.68737	0.164447	0.119639	0.00190987
		199.929	1.044	3.21804e+06	3.00775e+06	3.21804e+06	1.65939e+06	2.02325e+06	2.00071e+06	1.23665e+06	2.61725e+06	2.52447e+06	2.46867e+06	2.33465e+06	1.44818e+06	2.22624e+06	32.1772	25.5358	2.95844	24.1414	3.44205e+06	3.42703e+06	1.83984e+06	2.39377e+06	2.33305e+06	1.40334e+06	4.5547e+06	4.36052e+06	4.06058e+06	2.47038e+06	1.44818e+06	2.3424e+06	2.90298e+06	2.04338e+06	4.32527e+06	2.08699e+06	920732	555124	248942	556914	1.39099	0.979108	2.07249	0.476111	-0.0304606	1.05137	0.259308	0.928106	0.00314152
		317.898	1.029	1.18256e+06	1.18256e+06	968813	992177	651879	618110	699465	940403	756150	916365	788693	797441	831271	11.1891	6.226	11.5001	2.79059	1.35331e+06	1.03173e+06	1.10007e+06	771259	720784	793750	1.63655e+06	1.3061e+06	1.50727e+06	834545	797441	874646	1.16171e+06	761931	1.48331e+06	835544	169420	37366.6	166523	38611.8	1.39036	0.911898	1.77526	0.475457	-0.133056	0.82803	0.0313425	0.0765773	0.00278764
		287.961	1.764	1.29383e+08	1.29383e+08	4.51292e+07	2.77058e+07	1.13191e+08	4.0851e+07	4.22102e+07	6.95065e+07	3.19947e+07	4.14312e+07	7.50436e+07	4.47765e+07	3.74264e+07	80.6694	63.2536	40.9545	38.0386	1.48065e+08	4.80601e+07	3.07187e+07	1.3392e+08	4.76368e+07	4.78999e+07	1.2096e+08	5.52646e+07	6.81477e+07	7.94064e+07	4.47765e+07	3.93793e+07	7.56146e+07	7.64856e+07	8.14573e+07	5.45207e+07	6.33403e+07	4.97399e+07	3.48113e+07	2.17199e+07	1.3869	1.40287	1.49406	0.47186	0.488384	0.579239	0.614323	0.521967	0.319004
		299.209	13.909	500741	285773	401791	467576	279244	293299	289693	473344	500741	475553	261058	271517	355523	23.9065	2.53974	3.1497	17.493	327037	427885	518422	330383	342019	328742	823744	864931	782209	276235	271517	374074	424448	333715	823628	307275	95739.1	7238.08	41360.7	57897.2	1.38133	1.08604	2.68042	0.466056	0.119083	1.42246	0.14389	0.47642	0.000230567
		404.032	14.109	2.8791e+06	2.32651e+06	2.8791e+06	1.13978e+06	1.78e+06	1.84415e+06	1.09981e+06	796316	432752	265880	2.46412e+06	1.56286e+06	868358	42.0173	26.1947	54.4289	49.033	2.66245e+06	3.06608e+06	1.26372e+06	2.10598e+06	2.15048e+06	1.24806e+06	1.3858e+06	747494	437330	2.60738e+06	1.56286e+06	913668	2.33075e+06	1.83484e+06	856875	1.69463e+06	945854	508653	483603	854510	1.37537	1.08273	0.50564	0.459819	0.114678	-0.983818	0.436147	0.819094	0.213518
		468.356	12.374	1.08509e+06	1.07201e+06	1.08509e+06	1.0204e+06	611318	580046	525301	614399	564830	562395	833780	828402	808763	3.22953	7.60874	5.05507	1.59877	1.22681e+06	1.15556e+06	1.13136e+06	723270	676398	596109	1.06922e+06	975633	925051	882254	828402	850963	1.17124e+06	665259	989967	853873	49618.1	64307.7	73144.1	27043.6	1.37168	0.779108	1.15938	0.455945	-0.360106	0.213359	0.000625377	0.00942762	0.0390589
		149.944	1.792	1.37318e+07	1.37318e+07	5.65056e+06	2.82272e+06	1.20559e+07	5.25376e+06	2.72723e+06	1.04101e+07	4.99404e+06	2.79335e+06	1.0911e+07	3.81388e+06	2.65019e+06	76.4885	72.24	64.6221	77.2047	1.57146e+07	6.01752e+06	3.12967e+06	1.42637e+07	6.12646e+06	3.09485e+06	1.81164e+07	8.62622e+06	4.59462e+06	1.15453e+07	3.81388e+06	2.78847e+06	8.28728e+06	7.82835e+06	1.04457e+07	6.04922e+06	6.59235e+06	5.77567e+06	6.94208e+06	4.78728e+06	1.36997	1.29411	1.72679	0.454149	0.371959	0.788094	0.659039	0.702289	0.417574
		135.014	15.666	1.83419e+06	1.63483e+06	1.65765e+06	1.83419e+06	989851	1.05358e+06	1.32292e+06	211923	210520	194486	1.19984e+06	1.23391e+06	1.5583e+06	6.38501	15.7557	4.71099	14.8689	1.87089e+06	1.76531e+06	2.03365e+06	1.17112e+06	1.22859e+06	1.50124e+06	368801	363632	319898	1.2696e+06	1.23391e+06	1.63961e+06	1.88995e+06	1.30032e+06	350777	1.38104e+06	135185	176364	26866.8	224641	1.3685	0.94155	0.253995	0.452594	-0.0868904	-1.97713	0.0282516	0.650089	0.00139716
		305.928	1.73	5.17329e+06	4.1752e+06	2.25502e+06	1.31485e+06	5.10142e+06	1.57445e+06	1.32023e+06	5.17329e+06	1.69341e+06	1.66073e+06	3.56905e+06	1.06276e+06	1.39939e+06	56.4703	79.2953	71.0158	67.6625	4.77808e+06	2.40147e+06	1.45783e+06	6.03565e+06	1.83598e+06	1.49819e+06	9.00289e+06	2.92504e+06	2.73163e+06	3.77655e+06	1.06276e+06	1.4724e+06	2.87913e+06	3.12327e+06	4.88652e+06	2.1039e+06	1.71089e+06	2.52784e+06	3.56619e+06	1.46296e+06	1.36847	1.48451	2.3226	0.452564	0.56999	1.21574	0.582971	0.578111	0.279322
		331.272	16.692	1.43656e+06	22175.4	847678	1.09473e+06	1.26874e+06	1.24401e+06	1.28078e+06	1.2122e+06	1.43656e+06	1.30889e+06	579301	522186	415190	85.7699	1.48266	8.53053	16.4787	25377.4	902729	1.21378e+06	1.50109e+06	1.45065e+06	1.45342e+06	2.10955e+06	2.48137e+06	2.15292e+06	612980	522186	436854	713961	1.46839e+06	2.24795e+06	524007	616278	28355.5	203314	88077.2	1.3625	2.80223	4.28992	0.446259	1.48657	2.10095	0.625119	6.01484e-05	0.000175431
		311.957	13.192	816734	51270.2	28825.7	26901.9	816734	579878	587568	590388	115233	379774	29780.9	29654.1	25190.7	37.9854	20.3486	65.8066	9.26779	58673.3	30697.8	29827.3	966304	676202	666769	1.02743e+06	199042	624667	31512.2	29654.1	26505.1	39732.8	769758	617046	29223.8	16408.7	170279	414247	2531.15	1.3596	26.3401	21.1145	0.443186	4.71919	4.40016	0.334509	0.00166408	0.0698594
		120.951	1.023	3.15741e+06	3.15741e+06	2.5312e+06	2.767e+06	2.154e+06	1.90988e+06	2.26919e+06	2.46391e+06	2.78708e+06	2.86554e+06	2.17667e+06	2.18184e+06	2.29635e+06	11.2211	8.69111	7.86845	3.04983	3.61333e+06	2.69559e+06	3.0679e+06	2.54847e+06	2.22713e+06	2.57507e+06	4.28785e+06	4.81414e+06	4.71336e+06	2.30322e+06	2.18184e+06	2.41617e+06	3.12561e+06	2.45022e+06	4.60511e+06	2.30041e+06	461584	193662	279345	117191	1.35872	1.06513	2.00187	0.442245	0.0910228	1.00135	0.0398927	0.315567	0.000191573
		236.933	14.109	2.8208e+06	2.8208e+06	1.18623e+06	1.09868e+06	2.24688e+06	1.22673e+06	1.15001e+06	95477.9	34093.7	49655.8	1.54203e+06	1.34105e+06	1.17089e+06	56.9937	39.7307	53.4142	13.7482	3.22811e+06	1.26327e+06	1.21816e+06	2.65835e+06	1.4305e+06	1.30503e+06	166157	58890.2	81675.8	1.63168e+06	1.34105e+06	1.23199e+06	1.90318e+06	1.79796e+06	102241	1.40157e+06	1.14764e+06	747757	56513	206606	1.35789	1.28282	0.0729472	0.441365	0.359313	-3.777	0.497632	0.42615	0.000463969
		682.192	14.108	899733	633730	788894	899733	394551	420776	307302	201582	154821	156532	758849	390508	662441	17.2603	15.8758	15.509	31.6283	725238	840128	997574	466806	490671	348725	350805	267423	257471	802967	390508	697006	854313	435401	291900	630160	136721	76005.8	51255.9	214201	1.35571	0.690936	0.463215	0.439046	-0.533376	-1.11025	0.201275	0.211924	0.0563833
	C19 H10 O13	446.01	14.099	1.58716e+06	1.58716e+06	741567	731110	1.2573e+06	740015	660100	21161.8	22693.4	21523.1	971761	738389	723329	48.1642	36.5988	3.67401	17.1715	1.81633e+06	789727	810615	1.48755e+06	862939	749078	36827	39198.4	35402	1.02826e+06	738389	761071	1.13889e+06	1.03319e+06	37142.5	842572	586775	397582	1917.78	161207	1.35168	1.22623	0.0440823	0.434759	0.29423	-4.50366	0.446473	0.48449	0.000981166
	C32 H26 O15	650.129	14.297	8.63502e+06	8.63502e+06	4.30775e+06	2.84027e+06	7.39766e+06	4.05698e+06	2.81236e+06	344068	187535	124763	6.19821e+06	3.75252e+06	2.69885e+06	57.2645	49.8595	51.6223	42.576	9.88188e+06	4.58751e+06	3.14913e+06	8.7524e+06	4.73088e+06	3.19146e+06	598770	323929	205215	6.55856e+06	3.75252e+06	2.83968e+06	5.87284e+06	5.55825e+06	375972	4.38358e+06	3.54563e+06	2.87131e+06	201873	1.93809e+06	1.33973	1.26797	0.085768	0.421947	0.342519	-3.54342	0.557954	0.588544	0.0235377
		324.875	1.028	6.21942e+06	6.21942e+06	5.65596e+06	5.70539e+06	3.11853e+06	3.43947e+06	4.16697e+06	5.43585e+06	5.41236e+06	5.51516e+06	4.37533e+06	4.84445e+06	4.8106e+06	5.32441	15.0266	0.987604	5.59406	7.11747e+06	6.02328e+06	6.32583e+06	3.68963e+06	4.0108e+06	4.72866e+06	9.45981e+06	9.34878e+06	9.07156e+06	4.62971e+06	4.84445e+06	5.06162e+06	6.48886e+06	4.14303e+06	9.29338e+06	4.84526e+06	565022	531987	199964	215956	1.33922	0.855069	1.91804	0.421391	-0.225887	0.93963	0.00926479	0.101522	1.26546e-05
		497.04	16.38	918259	860971	918259	788175	630726	599773	628328	157140	198856	149531	700333	581654	757219	7.61811	2.7792	15.7589	13.1782	985291	977894	873886	746232	699402	713024	273465	343484	245955	741048	581654	796730	945690	719553	287635	706477	62294.7	24088.4	50285.2	111628	1.3386	1.01851	0.407139	0.420725	0.0264567	-1.29641	0.0316393	0.852471	0.00406447
		327.225	13.677	538906	538906	443085	407406	393358	267535	277419	205486	206142	210057	436465	432292	251605	14.6834	22.3696	1.19273	28.2619	616721	471861	451710	465394	311975	314814	357600	356070	345511	461840	432292	264733	513431	364061	353060	386288	90018.1	87768.7	6582.61	106301	1.32914	0.942459	0.913981	0.410491	-0.085498	-0.129764	0.18905	0.793878	0.617621
		266.164	16.177	3.93118e+06	3.93118e+06	2.06656e+06	2.66491e+06	3.78928e+06	2.20549e+06	2.62918e+06	3.57187e+06	2.11928e+06	2.59595e+06	2.64125e+06	1.94607e+06	2.40216e+06	32.9705	28.5229	26.8051	15.1593	4.49882e+06	2.20077e+06	2.9547e+06	4.48322e+06	2.57184e+06	2.98358e+06	6.216e+06	3.66064e+06	4.26993e+06	2.7948e+06	1.94607e+06	2.52751e+06	3.2181e+06	3.34621e+06	4.71552e+06	2.42279e+06	1.17145e+06	1.00597e+06	1.33469e+06	433945	1.32826	1.38114	1.94632	0.409535	0.465857	0.960746	0.33205	0.218099	0.0473677
		113.01	1.023	1.34954e+06	1.34954e+06	1.16566e+06	1.29988e+06	1.01361e+06	833636	932745	1.25138e+06	1.08249e+06	1.19155e+06	990491	1.01293e+06	1.07666e+06	7.48011	9.72738	7.2869	4.35416	1.54441e+06	1.24137e+06	1.44123e+06	1.19923e+06	972112	1.05847e+06	2.17773e+06	1.86979e+06	1.95991e+06	1.04808e+06	1.01293e+06	1.13284e+06	1.409e+06	1.07661e+06	2.00248e+06	1.06462e+06	154071	114641	158322	61641.5	1.32348	1.01126	1.88094	0.404339	0.0161548	0.911452	0.0228694	0.880986	0.00066847
		150.942	1.021	3.06538e+07	3.06538e+07	2.31525e+07	2.43345e+07	1.74816e+07	2.23899e+07	1.73345e+07	2.83764e+07	2.4538e+07	2.48214e+07	1.94864e+07	2.16049e+07	2.21952e+07	15.4844	15.0887	8.25481	6.75235	3.50801e+07	2.46561e+07	2.69808e+07	2.0683e+07	2.61091e+07	1.96711e+07	4.93825e+07	4.23846e+07	4.08273e+07	2.06193e+07	2.16049e+07	2.33533e+07	2.89057e+07	2.21544e+07	4.41981e+07	2.18591e+07	5.47209e+06	3.46201e+06	4.55679e+06	1.38463e+06	1.32236	1.01351	2.02195	0.403116	0.0193561	1.01575	0.0966448	0.897537	0.00124842
		417.012	14.104	3.38533e+06	3.38533e+06	1.53991e+06	1.43454e+06	2.65255e+06	1.49793e+06	1.42825e+06	86993	65640.9	64728.6	1.95993e+06	1.68695e+06	1.53651e+06	51.7536	36.977	17.3892	12.4231	3.87415e+06	1.63991e+06	1.59054e+06	3.13832e+06	1.74675e+06	1.62078e+06	151391	113382	106468	2.07388e+06	1.68695e+06	1.61668e+06	2.3682e+06	2.16862e+06	123747	1.7925e+06	1.30442e+06	842146	24188.5	246196	1.32117	1.20983	0.0690359	0.401816	0.2748	-3.85651	0.49433	0.499031	0.000306824
		380.253	16.673	1.75615e+06	99323.5	867603	854641	957023	1.00666e+06	855583	1.09723e+06	1.63808e+06	1.75615e+06	382593	568934	510028	72.444	8.19424	23.4671	19.5506	113665	923948	947579	1.13228e+06	1.17388e+06	970912	1.90947e+06	2.82946e+06	2.88858e+06	404836	568934	536640	661731	1.09236e+06	2.54251e+06	503470	474786	107213	549020	86932.3	1.31434	2.16966	5.04996	0.394338	1.11747	2.33627	0.60046	0.00178815	0.00314448
		445.007	14.109	8.98021e+06	8.98021e+06	4.23509e+06	3.80784e+06	2.18742e+06	4.01338e+06	3.83592e+06	21904.7	23570.4	22278.7	5.14605e+06	4.4916e+06	4.31955e+06	50.5939	30.0967	3.86975	9.37332	1.02769e+07	4.51013e+06	4.22193e+06	2.588e+06	4.68004e+06	4.35298e+06	38120	40713.3	36645	5.44523e+06	4.4916e+06	4.54493e+06	6.33632e+06	3.87368e+06	38492.8	4.82726e+06	3.41569e+06	1.12537e+06	2059.61	535845	1.31261	0.802459	0.00797404	0.392443	-0.3175	-6.97047	0.491738	0.255761	0.000101671
		130.923	14.116	1.38104e+07	1.32765e+07	7.18253e+06	2.89493e+06	1.38104e+07	5.79817e+06	3.10687e+06	597234	213958	158690	1.21831e+07	4.72769e+06	2.14726e+06	67.0155	73.5334	73.8781	82.0368	1.51936e+07	7.64899e+06	3.20974e+06	1.63395e+07	6.76131e+06	3.52566e+06	1.03934e+06	369570	261019	1.28914e+07	4.72769e+06	2.2593e+06	8.68411e+06	8.87548e+06	556644	6.62615e+06	6.05862e+06	6.66338e+06	421540	5.56451e+06	1.31058	1.33946	0.0840073	0.390208	0.421655	-3.57334	0.687133	0.676831	0.132691
		277.025	14.106	4.43297e+06	4.43297e+06	2.91521e+06	1.67066e+06	3.32351e+06	1.97955e+06	1.11857e+06	687403	363243	224377	3.85488e+06	2.04886e+06	1.46508e+06	46.0171	51.9145	55.9077	50.7233	5.07306e+06	3.10454e+06	1.85233e+06	3.93215e+06	2.30837e+06	1.26935e+06	1.19626e+06	627430	369065	4.079e+06	2.04886e+06	1.54153e+06	3.34331e+06	2.50329e+06	730919	2.55646e+06	1.62359e+06	1.34206e+06	423198	1.34273e+06	1.30779	0.9792	0.28591	0.387129	-0.0303239	-1.80636	0.552969	0.963633	0.0880405
		306.865	1.026	5.74316e+06	5.57983e+06	5.6671e+06	5.74316e+06	3.24077e+06	3.55018e+06	4.04007e+06	5.49995e+06	5.26266e+06	5.49153e+06	4.58306e+06	4.71342e+06	4.5807e+06	1.44319	11.1633	2.48492	1.64195	6.38552e+06	6.03514e+06	6.36771e+06	3.83426e+06	4.1399e+06	4.58466e+06	9.57137e+06	9.09021e+06	9.03269e+06	4.8495e+06	4.71342e+06	4.81972e+06	6.26279e+06	4.18627e+06	9.23142e+06	4.79421e+06	197352	377341	295806	71539.4	1.30632	0.873193	1.92553	0.385512	-0.195627	0.945259	0.000266109	0.0518153	1.45997e-05
		302.87	1.026	1.18628e+07	9.13349e+06	1.01094e+07	1.18628e+07	7.90818e+06	7.14732e+06	8.0503e+06	1.10657e+07	9.23572e+06	1.12878e+07	9.68037e+06	8.01963e+06	7.70051e+06	13.3383	6.3041	10.6949	12.5548	1.04523e+07	1.0766e+07	1.31528e+07	9.35641e+06	8.33456e+06	9.13545e+06	1.92572e+07	1.59529e+07	1.85667e+07	1.02432e+07	8.01963e+06	8.10231e+06	1.1457e+07	8.94214e+06	1.79256e+07	8.78837e+06	1.47694e+06	537653	1.74296e+06	1.26057e+06	1.30366	1.0175	2.0397	0.382568	0.0250253	1.02835	0.0759499	0.855373	0.00181785
		433.898	16.048	2.50831e+06	2.28541e+06	2.50831e+06	2.0897e+06	1.22718e+06	1.02692e+06	895207	2.34547e+06	2.2328e+06	2.43848e+06	1.82352e+06	1.85059e+06	2.03774e+06	9.12843	15.9235	4.40369	6.12706	2.61542e+06	2.67121e+06	2.31695e+06	1.45191e+06	1.1975e+06	1.01588e+06	4.08174e+06	3.85671e+06	4.01091e+06	1.92953e+06	1.85059e+06	2.14407e+06	2.53452e+06	1.22176e+06	3.98312e+06	1.97473e+06	190480	219027	115059	151871	1.28348	0.618699	2.01705	0.360059	-0.692691	1.01224	0.0164004	0.00808342	5.29382e-05
		315.901	1.026	948752	948752	896535	915625	612780	609217	643752	882784	835205	901732	742800	770042	784159	2.8709	3.05409	3.92503	2.7458	1.08575e+06	954759	1.0152e+06	724999	710414	730526	1.53628e+06	1.44265e+06	1.48321e+06	785985	770042	825076	1.01857e+06	721980	1.48738e+06	793701	65558.9	10390.7	46952.2	28316.8	1.28331	0.909637	1.87398	0.359873	-0.136637	0.906104	0.00549233	0.014631	2.56657e-05
	C14 H22	190.172	16.408	3.28316e+06	245534	2.78945e+06	2.46236e+06	3.28316e+06	2.91021e+06	2.76091e+06	3.05179e+06	2.87675e+06	2.66089e+06	1.75183e+06	1.52876e+06	1.22743e+06	75.5277	9.01208	6.83865	17.5135	280987	2.97061e+06	2.73013e+06	3.88441e+06	3.39362e+06	3.13306e+06	5.31091e+06	4.96901e+06	4.37675e+06	1.85367e+06	1.52876e+06	1.29147e+06	1.99391e+06	3.47037e+06	4.88556e+06	1.55797e+06	1.4883e+06	381506	472641	282235	1.27981	2.22749	3.13585	0.355933	1.15542	1.64886	0.644327	0.00221585	0.000470378
		357.251	14.711	438808	438808	387133	338891	233454	229034	236805	313494	351717	320992	329861	282090	363419	12.8693	1.67212	6.16107	12.5708	502170	412275	375743	276207	267079	268725	545562	607521	527981	349039	282090	382381	430062	270670	560355	337837	65063.1	4864.98	41782.6	51075.3	1.27299	0.801187	1.65865	0.34822	-0.319789	0.730014	0.125644	0.0859683	0.0042843
		177.942	1.247	1.95237e+08	6.74354e+07	1.95237e+08	1.34838e+08	6.64865e+07	1.24046e+08	1.31714e+08	7.27966e+07	8.63366e+07	1.37605e+08	6.80958e+07	1.44422e+08	1.18947e+08	48.2498	33.1911	34.5613	35.1709	7.71728e+07	2.07916e+08	1.49501e+08	7.86623e+07	1.44652e+08	1.49469e+08	1.26685e+08	1.49129e+08	2.26338e+08	7.20548e+07	1.44422e+08	1.25154e+08	1.44863e+08	1.24261e+08	1.67384e+08	1.13877e+08	6.54949e+07	3.95629e+07	5.22744e+07	3.74784e+07	1.2721	1.09119	1.46987	0.347216	0.125897	0.55569	0.516215	0.757937	0.223062
		445.827	1.534	3.3187e+06	3.15646e+06	2.34395e+06	2.57224e+06	3.17368e+06	1.62462e+06	1.65891e+06	3.3187e+06	2.09878e+06	2.50169e+06	3.05928e+06	1.57626e+06	2.167e+06	15.5728	41.0992	23.5465	32.9258	3.61224e+06	2.49618e+06	2.85196e+06	3.75488e+06	1.89449e+06	1.88252e+06	5.77541e+06	3.62522e+06	4.11488e+06	3.23714e+06	1.57626e+06	2.28007e+06	2.98679e+06	2.51063e+06	4.50517e+06	2.36449e+06	570116	1.07757e+06	1.12697e+06	833648	1.26319	1.06181	1.90535	0.337067	0.0865197	0.930052	0.345996	0.861651	0.0572796
		151.943	1.027	2.06371e+06	2.06371e+06	1.82838e+06	1.89609e+06	1.44155e+06	1.41996e+06	1.50261e+06	1.88443e+06	1.82284e+06	1.90457e+06	1.59473e+06	1.62812e+06	1.67439e+06	6.27907	2.94669	2.27622	2.45069	2.3617e+06	1.94712e+06	2.10228e+06	1.70555e+06	1.65582e+06	1.70515e+06	3.27941e+06	3.1486e+06	3.13271e+06	1.68744e+06	1.62812e+06	1.76176e+06	2.13703e+06	1.68884e+06	3.18691e+06	1.69244e+06	209462	28593.6	80501.7	66959.9	1.26269	0.997874	1.88303	0.336504	-0.0030698	0.913053	0.0248561	0.935915	1.58924e-05
		299.209	13.243	3.70038e+06	3.70038e+06	3.26066e+06	3.24259e+06	2.79296e+06	2.21655e+06	2.71658e+06	3.33457e+06	3.14839e+06	3.21452e+06	2.69766e+06	3.01113e+06	2.93789e+06	7.62224	12.1567	2.91979	5.68926	4.2347e+06	3.47242e+06	3.59521e+06	3.30444e+06	2.58474e+06	3.08276e+06	5.80303e+06	5.43822e+06	5.28738e+06	2.8545e+06	3.01113e+06	3.09118e+06	3.76744e+06	2.99064e+06	5.50955e+06	2.9856e+06	409289	368584	265122	120389	1.26187	1.00169	1.84537	0.335563	0.00243414	0.883911	0.033723	0.983111	0.000114676
		203.925	1.046	643704	643704	596109	620345	504730	486435	422227	608078	564114	603133	545383	525389	513198	3.83816	9.19669	4.06953	3.07763	736651	634822	687805	597162	567237	479141	1.05822e+06	974395	992057	577090	525389	539976	686426	547847	1.00822e+06	547485	50928.3	61353.1	44187.2	26656.1	1.25378	1.00066	1.84155	0.326285	0.000952107	0.880923	0.0138451	0.992981	0.000102057
		423.869	16.047	664966	494132	588205	424753	312212	251642	261395	664966	521691	428601	520085	371270	385346	16.33	11.8228	22.1142	19.3052	565483	626405	470943	369388	293442	296630	1.15722e+06	901119	704981	550321	371270	405453	554277	319820	921105	442348	78334.2	42956.8	226779	95056.5	1.25303	0.723005	2.08231	0.325424	-0.467923	1.05818	0.190621	0.111637	0.0279842
		217.935	1.557	3.01772e+07	3.01772e+07	2.16729e+07	2.10466e+07	2.44713e+07	1.77375e+07	1.652e+07	2.93249e+07	2.27519e+07	2.46679e+07	2.14621e+07	2.19163e+07	1.90619e+07	20.9903	21.8769	13.2143	7.36908	3.45347e+07	2.30804e+07	2.33353e+07	2.89528e+07	2.06839e+07	1.87469e+07	5.1033e+07	3.92994e+07	4.05747e+07	2.27098e+07	2.19163e+07	2.00565e+07	2.69834e+07	2.27945e+07	4.36357e+07	2.15609e+07	6.5408e+06	5.42043e+06	6.43793e+06	1.36189e+06	1.2515	1.05722	2.02384	0.323658	0.0802698	1.01709	0.232505	0.721676	0.00436606
		207	1.022	1.25125e+06	1.24833e+06	1.13242e+06	1.25125e+06	987768	937111	1.03472e+06	1.12788e+06	1.07581e+06	1.16515e+06	1.00091e+06	1.01922e+06	1.0883e+06	5.59868	4.9481	3.99615	4.44767	1.42859e+06	1.20596e+06	1.38731e+06	1.16866e+06	1.09277e+06	1.17419e+06	1.96281e+06	1.85824e+06	1.91648e+06	1.0591e+06	1.01922e+06	1.14508e+06	1.34062e+06	1.14521e+06	1.91251e+06	1.07447e+06	118431	45493.7	52394.6	64322.6	1.24771	1.06584	1.77996	0.319278	0.091987	0.831845	0.0267672	0.194878	6.26541e-05
		156.982	14.113	4.32361e+06	4.32361e+06	2.1715e+06	889783	4.25446e+06	1.88977e+06	1.10186e+06	566763	265753	164619	3.81166e+06	1.37516e+06	1.14334e+06	70.4899	67.9278	62.9363	70.0544	4.94791e+06	2.31253e+06	986543	5.03359e+06	2.20368e+06	1.25038e+06	986318	459036	270773	4.03327e+06	1.37516e+06	1.203e+06	2.74899e+06	2.82922e+06	572042	2.20381e+06	2.01643e+06	1.96765e+06	370916	1.58669e+06	1.24738	1.28379	0.25957	0.318904	0.360404	-1.94581	0.731505	0.690321	0.157851
		170.952	1.025	1.09532e+07	1.09401e+07	1.00939e+07	1.04895e+07	7.7962e+06	7.70184e+06	7.77518e+06	9.76192e+06	1.00669e+07	1.09532e+07	8.92939e+06	9.03129e+06	9.02776e+06	4.0296	0.638558	6.03121	0.642893	1.25198e+07	1.07494e+07	1.16302e+07	9.22393e+06	8.9812e+06	8.82324e+06	1.69883e+07	1.73885e+07	1.80163e+07	9.44853e+06	9.03129e+06	9.49882e+06	1.16331e+07	9.00946e+06	1.74644e+07	9.32621e+06	885213	201834	518171	256647	1.24736	0.966036	1.87261	0.318876	-0.049851	0.905052	0.0122983	0.168189	1.68034e-05
		712.413	13.842	8.26757e+06	7.01504e+06	7.52919e+06	7.78028e+06	4.80375e+06	4.79148e+06	5.063e+06	8.26757e+06	8.18585e+06	7.66267e+06	6.40003e+06	6.36676e+06	6.31339e+06	5.242	3.13837	4.08276	0.687186	8.02798e+06	8.01817e+06	8.62635e+06	5.68347e+06	5.58739e+06	5.74547e+06	1.43877e+07	1.41394e+07	1.26039e+07	6.77211e+06	6.36676e+06	6.64282e+06	8.22417e+06	5.67211e+06	1.37104e+07	6.5939e+06	348338	79647.3	966251	207054	1.24724	0.860206	2.07925	0.318738	-0.217246	1.05606	0.00222988	0.00197537	0.000237589
		380.253	16.964	3.85681e+06	118582	1.67596e+06	1.92606e+06	1.93319e+06	2.03554e+06	2.34171e+06	3.08785e+06	3.68278e+06	3.85681e+06	622513	1.25383e+06	1.27693e+06	78.9684	10.1054	11.3824	35.3289	135704	1.7848e+06	2.13551e+06	2.28722e+06	2.37367e+06	2.65737e+06	5.37368e+06	6.36128e+06	6.34383e+06	658704	1.25383e+06	1.34355e+06	1.35201e+06	2.43942e+06	6.02626e+06	1.08536e+06	1.06784e+06	193634	565223	372211	1.24567	2.24756	5.5523	0.316923	1.16836	2.47309	0.703899	0.00502514	0.000225193
		201.926	1.041	1.09677e+06	1.09677e+06	1.01965e+06	1.02376e+06	791902	808888	731310	1.03364e+06	1.0014e+06	978308	925344	873854	892572	4.14514	5.246	2.76661	2.90474	1.25514e+06	1.08587e+06	1.13509e+06	936925	943253	829887	1.7988e+06	1.72973e+06	1.60916e+06	979142	873854	939145	1.1587e+06	903355	1.71256e+06	930713	87069.1	63703.5	95976.8	53148	1.24496	0.970605	1.84005	0.316099	-0.0430444	0.879746	0.0179766	0.598439	0.000247534
		115.064	1.813	1.45356e+06	291791	613602	303456	814257	1.45356e+06	1.25404e+06	349215	578940	319147	439969	269032	313875	45.2968	27.8623	34.18	25.9939	333925	653452	336456	963374	1.69501e+06	1.42308e+06	607726	1.00001e+06	524946	465548	269032	330253	441277	1.36049e+06	710893	354945	183753	369814	253777	100558	1.24323	3.83296	2.00283	0.314092	1.93846	1.00204	0.514751	0.010461	0.0868213
		315.204	12.726	7.77811e+06	7.77811e+06	7.57844e+06	7.15944e+06	5.0479e+06	5.06005e+06	4.62237e+06	6.35861e+06	6.19637e+06	5.96929e+06	6.76674e+06	6.73944e+06	5.84753e+06	4.207	5.07646	3.1671	8.10701	8.90123e+06	8.07062e+06	7.93799e+06	5.97233e+06	5.90058e+06	5.24545e+06	1.10657e+07	1.0703e+07	9.81853e+06	7.16014e+06	6.73944e+06	6.15265e+06	8.30328e+06	5.70612e+06	1.05291e+07	6.68408e+06	522068	400561	641506	506024	1.24225	0.853688	1.57525	0.312952	-0.228219	0.655577	0.0181879	0.0585138	0.00123304
		484.35	8.732	5.60491e+06	5.60491e+06	5.39577e+06	4.39339e+06	3.74714e+06	3.31799e+06	2.60801e+06	3.39201e+06	2.37303e+06	2.02002e+06	5.38631e+06	4.22617e+06	3.65289e+06	12.6204	17.8425	27.4534	19.9718	6.41423e+06	5.74619e+06	4.87114e+06	4.43337e+06	3.86914e+06	2.95955e+06	5.90299e+06	4.09895e+06	3.32262e+06	5.69946e+06	4.22617e+06	3.84349e+06	5.67719e+06	3.75402e+06	4.44152e+06	4.58971e+06	773854	743620	1.32386e+06	979934	1.23694	0.817922	0.967713	0.306775	-0.289965	-0.0473486	0.205924	0.304574	0.883713
		106.953	1.024	1.32559e+06	1.32559e+06	1.09672e+06	1.31834e+06	1.01622e+06	996046	1.11217e+06	1.20183e+06	1.28791e+06	1.23573e+06	1.1129e+06	981336	1.13473e+06	10.4334	5.9577	3.49167	7.70993	1.517e+06	1.16795e+06	1.4617e+06	1.20232e+06	1.1615e+06	1.26209e+06	2.09151e+06	2.22461e+06	2.03258e+06	1.17761e+06	981336	1.19394e+06	1.38221e+06	1.20864e+06	2.11623e+06	1.11763e+06	187608	50592.4	98373.3	118315	1.23674	1.08143	1.8935	0.306541	0.112942	0.921059	0.107697	0.287771	0.000356754
	C14 H16 O6	280.095	17.177	853883	4807.4	2784.16	2642.89	6453.66	6700.92	5502.79	750163	754007	853883	3029.05	3488.35	2415.25	35.4965	10.1712	7.4813	18.0821	5501.56	2964.97	2930.3	7635.54	7814.01	6244.54	1.30548e+06	1.3024e+06	1.4045e+06	3205.16	3488.35	2541.27	3798.94	7231.36	1.33746e+06	3078.26	1474.61	859.258	58079.4	486.124	1.23412	2.34917	434.486	0.303483	1.23215	8.76317	0.466491	0.0018856	2.38293e-06
		205.001	1.018	3.21132e+06	3.21132e+06	2.57327e+06	2.91713e+06	2.38108e+06	2.11708e+06	1.93341e+06	2.59592e+06	2.61089e+06	2.88339e+06	2.39026e+06	2.47867e+06	2.69658e+06	11.0098	10.4967	6.00061	6.25152	3.67502e+06	2.74039e+06	3.23436e+06	2.81714e+06	2.46874e+06	2.19403e+06	4.51759e+06	4.50979e+06	4.74271e+06	2.52923e+06	2.47867e+06	2.83728e+06	3.21659e+06	2.4933e+06	4.59003e+06	2.61506e+06	467570	312280	132282	194103	1.23002	0.95344	1.75523	0.298686	-0.0687866	0.81166	0.1087	0.596971	0.000129303
		459.246	14.012	389318	389318	351320	305820	214058	212217	199705	281767	260791	228012	338465	305125	265568	11.9847	3.7427	10.5477	12.0418	445533	374136	339077	253259	247469	226625	490349	450465	375044	358143	305125	279425	386249	242451	438619	314231	54252	14008.1	58558	40141.2	1.22919	0.77157	1.39585	0.297707	-0.374132	0.481146	0.138258	0.043059	0.0386034
	C14 H22	190.172	16.69	5.49809e+06	20319.3	3.63501e+06	3.92294e+06	3.91105e+06	4.81515e+06	5.05405e+06	5.03431e+06	5.49809e+06	5.45139e+06	2.0786e+06	2.26052e+06	2.14619e+06	86.0948	13.1253	4.79279	4.2538	23253.3	3.87108e+06	4.34954e+06	4.62728e+06	5.615e+06	5.73531e+06	8.76102e+06	9.49687e+06	8.96667e+06	2.19944e+06	2.26052e+06	2.25817e+06	2.74796e+06	5.32586e+06	9.07485e+06	2.23938e+06	2.37176e+06	607972	379664	34605.6	1.22711	2.37828	4.0524	0.295262	1.24992	2.01878	0.729198	0.000928395	6.40651e-06
		312.917	16.054	1.86723e+06	1.86723e+06	1.15219e+06	1.17715e+06	1.20313e+06	960759	886503	1.47018e+06	1.00646e+06	973537	1.1545e+06	1.24456e+06	1.27794e+06	29.0103	16.2848	24.1484	5.20954	2.13685e+06	1.22702e+06	1.30516e+06	1.42346e+06	1.12035e+06	1.006e+06	2.55851e+06	1.73847e+06	1.60131e+06	1.22162e+06	1.24456e+06	1.34463e+06	1.55634e+06	1.18327e+06	1.9661e+06	1.27027e+06	504248	215724	517605	65407.5	1.22521	0.931511	1.54778	0.293026	-0.102356	0.6302	0.384999	0.540431	0.0820269
		182.981	15.993	5.18757e+06	5.18757e+06	3.96011e+06	3.66018e+06	3.24395e+06	2.32142e+06	2.1875e+06	4.60501e+06	3.9863e+06	3.52372e+06	4.68347e+06	3.50298e+06	2.99153e+06	18.9557	22.2573	13.4342	23.2888	5.93663e+06	4.21729e+06	4.05821e+06	3.83802e+06	2.70703e+06	2.48237e+06	8.01393e+06	6.88554e+06	5.79596e+06	4.95576e+06	3.50298e+06	3.14762e+06	4.73738e+06	3.00914e+06	6.89847e+06	3.86879e+06	1.04163e+06	726569	1.10904e+06	957968	1.22451	0.777799	1.78311	0.292207	-0.36253	0.834396	0.347662	0.283284	0.0231521
		122.948	1.024	1.85408e+06	1.80418e+06	1.75349e+06	1.85408e+06	1.28699e+06	1.32758e+06	1.49965e+06	1.64149e+06	1.70744e+06	1.77759e+06	1.49852e+06	1.58885e+06	1.63678e+06	2.788	8.2325	3.98295	4.4586	2.0647e+06	1.86737e+06	2.0557e+06	1.52267e+06	1.54811e+06	1.70179e+06	2.85663e+06	2.94927e+06	2.92386e+06	1.58564e+06	1.58885e+06	1.72219e+06	1.99592e+06	1.59086e+06	2.90992e+06	1.63223e+06	111420	96910.9	47866.9	77927.6	1.22282	0.974656	1.78279	0.290214	-0.0370357	0.834137	0.00978502	0.595361	1.73021e-05
		152.941	1.024	1.49878e+07	1.47658e+07	1.4131e+07	1.45634e+07	1.08254e+07	1.07908e+07	1.10667e+07	1.37765e+07	1.41366e+07	1.49878e+07	1.28223e+07	1.27491e+07	1.27295e+07	2.23815	1.37972	4.3498	0.382865	1.68979e+07	1.50488e+07	1.61471e+07	1.28079e+07	1.25833e+07	1.25585e+07	2.39747e+07	2.44182e+07	2.46525e+07	1.35677e+07	1.27491e+07	1.33937e+07	1.60312e+07	1.26499e+07	2.43485e+07	1.32368e+07	929983	137398	344263	431275	1.21111	0.955657	1.83945	0.276327	-0.0654359	0.879272	0.00916176	0.088025	4.0331e-06
	C9 H8 O	132.058	14.103	6.60302e+06	6.60302e+06	5.89826e+06	5.71033e+06	5.68892e+06	4.43593e+06	4.10453e+06	2.69805e+06	2.59591e+06	1.81042e+06	6.33067e+06	5.22546e+06	4.51829e+06	7.75259	17.6186	20.5091	17.0478	7.55647e+06	6.28131e+06	6.3313e+06	6.73074e+06	5.17278e+06	4.6578e+06	4.69532e+06	4.48392e+06	2.97785e+06	6.69872e+06	5.22546e+06	4.75405e+06	6.72303e+06	5.52044e+06	4.05236e+06	5.55941e+06	722215	1.07932e+06	936542	1.01444e+06	1.20931	0.99299	0.72892	0.274179	-0.0101482	-0.456168	0.180868	0.965839	0.131657
		310.182	17.074	1.01597e+07	4.25156e+06	3.13675e+06	2.11304e+06	1.01597e+07	2.58239e+06	2.00701e+06	8.25641e+06	2.48298e+06	1.49552e+06	5.76416e+06	2.49467e+06	136469	33.7715	92.547	89.544	100.989	4.86547e+06	3.34046e+06	2.34282e+06	1.20202e+07	3.01136e+06	2.27754e+06	1.43683e+07	4.28886e+06	2.45989e+06	6.09927e+06	2.49467e+06	143590	3.51625e+06	5.7697e+06	7.03903e+06	2.91251e+06	1.27048e+06	5.42552e+06	6.4129e+06	2.99975e+06	1.20729	1.98101	2.41683	0.271774	0.986234	1.27311	0.764286	0.469434	0.369826
		155.939	1.017	2.56509e+06	2.56509e+06	2.49636e+06	2.52291e+06	1.98146e+06	2.01542e+06	1.89334e+06	2.4258e+06	2.43558e+06	2.35046e+06	2.34385e+06	2.25633e+06	2.1113e+06	1.37108	3.2093	1.93757	5.25036	2.93548e+06	2.65848e+06	2.79726e+06	2.34433e+06	2.3502e+06	2.14855e+06	4.22153e+06	4.20699e+06	3.86613e+06	2.48012e+06	2.25633e+06	2.22146e+06	2.79707e+06	2.28103e+06	4.09822e+06	2.3193e+06	138500	114765	201121	140359	1.206	0.983496	1.767	0.270227	-0.0240093	0.821304	0.013733	0.733121	0.000231018
		315.204	11.656	2.24569e+07	2.24569e+07	2.00035e+07	2.04914e+07	1.39533e+07	1.36597e+07	1.28001e+07	1.45603e+07	1.4311e+07	1.38991e+07	1.98438e+07	1.78958e+07	1.81212e+07	6.18924	4.44864	2.34223	5.72268	2.56996e+07	2.13026e+07	2.27197e+07	1.65086e+07	1.59287e+07	1.45255e+07	2.53388e+07	2.47194e+07	2.28618e+07	2.09974e+07	1.78958e+07	1.90667e+07	2.32406e+07	1.56543e+07	2.43067e+07	1.932e+07	2.24428e+06	1.01961e+06	1.28905e+06	1.56625e+06	1.20293	0.810263	1.25811	0.266555	-0.303538	0.331259	0.0681163	0.027345	0.013075
		867.544	12.837	1.70057e+06	914467	1.70057e+06	1.16164e+06	1.38522e+06	1.33412e+06	1.3609e+06	1.2661e+06	1.3397e+06	1.49733e+06	983392	1.1903e+06	1.15546e+06	31.9307	1.87922	8.63737	9.98266	1.04651e+06	1.81101e+06	1.28796e+06	1.63889e+06	1.55573e+06	1.54434e+06	2.20335e+06	2.31406e+06	2.46287e+06	1.04056e+06	1.1903e+06	1.21575e+06	1.38183e+06	1.57965e+06	2.32676e+06	1.14887e+06	390797	51617.6	130228	94655.8	1.20277	1.37496	2.02526	0.266358	0.459392	1.0181	0.372418	0.00228789	0.000223312
		168.953	1.026	1.83666e+07	1.83666e+07	1.5479e+07	1.59881e+07	1.30533e+07	1.2783e+07	1.2237e+07	1.65425e+07	1.68158e+07	1.71693e+07	1.45424e+07	1.46683e+07	1.51151e+07	9.27898	3.27691	1.86563	2.03706	2.10187e+07	1.64843e+07	1.77267e+07	1.54438e+07	1.49064e+07	1.38864e+07	2.87884e+07	2.9046e+07	2.82407e+07	1.53878e+07	1.46683e+07	1.59038e+07	1.84099e+07	1.47456e+07	2.86917e+07	1.532e+07	2.34311e+06	791045	411250	620557	1.20169	0.962506	1.87283	0.265068	-0.0551325	0.90522	0.0918321	0.378411	6.36113e-06
		278.04	13.898	1.00679e+07	5.18798e+06	6.42015e+06	6.13389e+06	4.43238e+06	4.49372e+06	4.22608e+06	9.25145e+06	1.00679e+07	9.34515e+06	4.65596e+06	6.44177e+06	4.69249e+06	10.9036	3.1983	4.67601	19.3915	5.93709e+06	6.83709e+06	6.80092e+06	5.24409e+06	5.24018e+06	4.79573e+06	1.61e+07	1.73903e+07	1.53713e+07	4.92665e+06	6.44177e+06	4.93734e+06	6.52503e+06	5.09333e+06	1.62872e+07	5.43525e+06	509492	257739	1.02244e+06	871682	1.2005	0.937092	2.99658	0.263639	-0.0937367	1.58332	0.134909	0.550251	0.000151455
		881.56	13.133	4.83539e+06	3.90084e+06	3.96098e+06	4.02346e+06	3.34589e+06	3.03758e+06	3.57793e+06	4.18791e+06	4.13674e+06	4.83539e+06	3.32767e+06	2.94063e+06	4.2645e+06	1.54768	8.16357	8.87762	19.388	4.4641e+06	4.21822e+06	4.461e+06	3.95863e+06	3.54215e+06	4.06021e+06	7.28806e+06	7.14541e+06	7.95344e+06	3.52113e+06	2.94063e+06	4.48702e+06	4.3811e+06	3.85366e+06	7.4623e+06	3.64959e+06	141073	274517	431275	781159	1.20044	1.05592	2.04469	0.263559	0.078495	1.03188	0.18569	0.691434	0.001778
		391.909	1.4	6.75689e+06	5.69911e+06	4.41666e+06	3.40304e+06	6.75689e+06	1.79916e+06	4.25982e+06	5.69585e+06	4.93292e+06	3.05247e+06	5.29121e+06	3.03834e+06	3.67927e+06	25.5346	58.027	29.8327	28.9983	6.52204e+06	4.7035e+06	3.7731e+06	7.99429e+06	2.09802e+06	4.83402e+06	9.91228e+06	8.52064e+06	5.02082e+06	5.59882e+06	3.03834e+06	3.87125e+06	4.99954e+06	4.97544e+06	7.81791e+06	4.16947e+06	1.39818e+06	2.95068e+06	2.52031e+06	1.30603e+06	1.19908	1.1933	1.87504	0.261932	0.25496	0.906919	0.494178	0.687594	0.0899907
		159.935	1.019	641401	641401	604312	623139	487274	513249	460559	608159	590118	578393	576406	557409	530317	2.97698	5.40955	2.53185	4.17568	734017	643559	690903	576509	598504	522640	1.05836e+06	1.01931e+06	951364	609917	557409	557988	689493	565884	1.00968e+06	575105	45245.4	39032.4	54143.1	30149.8	1.1989	0.983967	1.75564	0.26171	-0.0233178	0.811998	0.0218875	0.762308	0.000263667
		995.591	13.588	2.27681e+06	2.19189e+06	2.20642e+06	2.27681e+06	1.31018e+06	1.47527e+06	1.40644e+06	2.03259e+06	2.04065e+06	1.79837e+06	1.902e+06	1.93577e+06	2.10309e+06	2.04123	5.9346	7.03104	5.43773	2.50839e+06	2.34972e+06	2.5244e+06	1.55011e+06	1.72033e+06	1.59602e+06	3.53724e+06	3.52483e+06	2.95804e+06	2.01258e+06	1.93577e+06	2.21282e+06	2.46084e+06	1.62215e+06	3.34004e+06	2.05372e+06	96565.3	88063.4	330878	143038	1.19823	0.78986	1.62633	0.260908	-0.340331	0.701622	0.0150264	0.0112458	0.00348161
		327.886	1.61	6.15983e+07	6.15983e+07	4.41319e+07	2.24912e+07	5.28494e+07	3.93286e+07	2.35956e+07	5.29706e+07	2.94794e+07	2.37383e+07	6.03844e+07	3.12259e+07	2.31177e+07	45.8363	37.9384	43.757	51.2495	7.04928e+07	4.6998e+07	2.4937e+07	6.25278e+07	4.58614e+07	2.67761e+07	9.21829e+07	5.09199e+07	3.90458e+07	6.3895e+07	3.12259e+07	2.4324e+07	4.74759e+07	4.50551e+07	6.07162e+07	3.9815e+07	2.27817e+07	1.78895e+07	2.78902e+07	2.11376e+07	1.19241	1.13161	1.52496	0.253886	0.178381	0.60877	0.691378	0.75953	0.359349
	C7 H6 O3	138.03	14.125	4.16857e+07	2.86322e+06	3.35564e+06	2.62051e+06	2.58347e+06	2.46808e+06	2.67405e+06	2.81115e+07	3.74113e+07	4.16857e+07	2.55242e+06	3.17848e+06	2.21026e+06	12.7123	4.00877	19.4213	18.5489	3.27665e+06	3.57356e+06	2.90548e+06	3.05658e+06	2.87805e+06	3.0345e+06	4.89213e+07	6.46207e+07	6.85663e+07	2.70081e+06	3.17848e+06	2.32559e+06	3.2519e+06	2.98971e+06	6.07028e+07	2.73496e+06	334727	97326.9	1.0392e+07	427471	1.18901	1.09315	22.1951	0.249763	0.128486	4.47217	0.174466	0.371137	0.000644139
		429.236	14.191	2.16247e+07	1.51418e+07	1.70797e+07	1.76028e+07	9.71504e+06	1.13586e+07	1.16969e+07	1.79428e+07	2.16247e+07	1.92379e+07	1.19394e+07	1.74142e+07	1.55361e+07	7.80626	9.70522	9.52826	18.5921	1.73282e+07	1.81889e+07	1.9517e+07	1.14942e+07	1.32454e+07	1.32736e+07	3.12252e+07	3.73523e+07	3.16433e+07	1.26335e+07	1.74142e+07	1.63468e+07	1.83447e+07	1.26711e+07	3.34069e+07	1.54648e+07	1.10265e+06	1.01931e+06	3.42319e+06	2.50937e+06	1.18622	0.819347	2.16019	0.246373	-0.287454	1.11116	0.142903	0.148541	0.00185151
		421.95	13.196	1.24109e+06	1324.07	896.664	876.916	81214.6	104590	109515	1.24109e+06	944251	1.0871e+06	1011.9	897.947	892.974	24.4693	15.3589	13.6097	7.20073	1515.26	954.897	972.277	96087.6	121963	124277	2.15983e+06	1.63101e+06	1.7881e+06	1070.73	897.947	939.569	1147.48	114109	1.85965e+06	969.417	318.628	15650.1	271575	90.1777	1.18368	117.709	1918.31	0.243278	6.87908	10.9056	0.404392	0.000234042	0.00028995
		551.999	13.191	2.70942e+06	684.794	463.744	453.531	91350.8	70505.8	59339.1	2.70942e+06	2.11927e+06	2.1035e+06	523.345	464.408	461.836	24.4693	22.0364	14.9462	7.20073	783.675	493.861	502.85	108080	82217.5	67337.7	4.71511e+06	3.66062e+06	3.45992e+06	553.771	464.408	485.934	593.462	85878.4	3.94522e+06	501.371	164.79	20616.4	674254	46.6388	1.18368	171.287	7868.86	0.243278	7.42027	12.9419	0.404392	0.0020004	0.000533898
		502.02	16.391	1.09976e+06	1.09976e+06	983832	846880	987976	817224	747963	211435	194079	175829	975401	863510	813345	12.9587	14.5151	9.18826	9.38419	1.25855e+06	1.04773e+06	938974	1.16891e+06	952973	848785	367953	335233	289210	1.03211e+06	863510	855784	1.08175e+06	990221	330798	917134	162485	163279	39558.2	99645.7	1.17949	1.07969	0.360687	0.238164	0.110618	-1.47118	0.209013	0.544282	0.00069291
		299.209	13.566	1.11156e+06	719211	716327	863824	648895	661129	661547	940297	1.04954e+06	1.11156e+06	676163	842900	569784	11.0035	1.0936	8.38764	19.7715	823062	762848	957760	767728	770949	750721	1.63636e+06	1.81288e+06	1.82834e+06	715474	842900	599515	847890	763133	1.7592e+06	719296	99800.2	10869.1	106656	121738	1.17878	1.06094	2.44572	0.237291	0.0853483	1.29026	0.23001	0.568102	0.000371
		816.156	14.109	2.85368e+06	2.58382e+06	1.41408e+06	728619	2.06883e+06	808158	431627	43271.7	51389.1	17304.9	2.85368e+06	964878	463518	59.5413	77.7486	47.7039	88.3037	2.95691e+06	1.50591e+06	807853	2.4477e+06	942401	489809	75304.2	88764.6	28463.8	3.01959e+06	964878	487704	1.75689e+06	1.2933e+06	64177.5	1.49072e+06	1.09629e+06	1.02503e+06	31652.8	1.34536e+06	1.17855	0.867567	0.0430513	0.237014	-0.204952	-4.5378	0.803641	0.84965	0.140237
		357.251	14.512	1.00741e+06	937659	1.00741e+06	934685	667787	541839	551664	800767	831656	908600	918228	907750	795399	4.2875	11.932	6.55618	7.79272	1.07305e+06	1.07284e+06	1.03633e+06	790081	631843	626026	1.39355e+06	1.43652e+06	1.4945e+06	971612	907750	836903	1.06074e+06	682650	1.44152e+06	905421	21140.7	93082.9	50663.5	67384.9	1.17154	0.753958	1.5921	0.228408	-0.407443	0.670933	0.0189534	0.0283641	0.00038624
		302.958	16.045	998764	790696	774748	614319	529793	403689	358672	998764	784287	708901	859225	599789	522829	13.4263	20.5946	18.1052	26.6803	904869	825063	681124	626815	470746	407020	1.73811e+06	1.3547e+06	1.16603e+06	909178	599789	550110	803685	501527	1.41961e+06	686359	113394	113084	291514	194559	1.17094	0.730707	2.06833	0.227667	-0.452636	1.04846	0.417869	0.227927	0.0222831
		99.9957	1.411	5.41938e+07	4.33303e+07	3.43176e+07	2.71604e+07	2.80629e+07	2.1199e+07	1.98393e+07	5.41938e+07	3.67053e+07	1.73129e+07	3.70415e+07	3.31487e+07	2.57786e+07	23.1929	19.1377	51.1458	17.8815	4.9587e+07	3.65463e+07	3.0114e+07	3.32021e+07	2.47204e+07	2.25136e+07	9.43115e+07	6.34012e+07	2.8477e+07	3.9195e+07	3.31487e+07	2.71237e+07	3.87491e+07	2.6812e+07	6.20632e+07	3.31558e+07	9.92165e+06	5.64293e+06	3.29376e+07	6.03566e+06	1.1687	0.808667	1.87187	0.224901	-0.306382	0.904477	0.451087	0.254345	0.209178
		229.24	16.523	782281	55998.1	74496.7	52796.2	74302.1	51713.7	53994.8	782281	776383	761181	49944	63232.1	54283.7	19.1734	20.7244	1.40787	12.1389	64083.9	79334.7	58537.5	87909.2	60303.9	61273	1.36138e+06	1.34105e+06	1.25202e+06	52847.6	63232.1	57116.2	67318.7	69828.7	1.31815e+06	57732	10769.4	15665.7	58163.1	5219.55	1.16606	1.20953	22.8322	0.221637	0.27445	4.513	0.237593	0.273296	3.05731e-06
		154.026	6.093	5.9928e+06	1822.49	2597.4	2470.87	2040.22	2284.28	2305.27	5.02184e+06	5.9928e+06	5.88975e+06	688.081	2974.25	2671.93	18.0987	6.66723	9.465	58.8174	2085.65	2766.09	2739.56	2413.85	2663.73	2616.01	8.73932e+06	1.03514e+07	9.6877e+06	728.084	2974.25	2811.35	2530.43	2564.53	9.5928e+06	2171.23	385.424	132.653	810209	1252.45	1.16544	1.18114	4418.15	0.220873	0.240184	12.1092	0.659703	0.6173	3.34237e-05
		135.013	16.047	1.56377e+06	1.49796e+06	1.38763e+06	1.38246e+06	884771	754722	848788	1.4223e+06	1.43027e+06	1.56377e+06	1.14982e+06	1.38064e+06	1.3885e+06	4.58604	8.09616	5.39896	10.3797	1.71426e+06	1.47774e+06	1.5328e+06	1.0468e+06	880088	963201	2.47517e+06	2.47051e+06	2.57215e+06	1.21666e+06	1.38064e+06	1.46095e+06	1.57494e+06	963363	2.50594e+06	1.35275e+06	123761	83356.2	57386.7	124508	1.16425	0.712152	1.85248	0.219398	-0.489743	0.889458	0.0934689	0.0108125	0.000129087
		111.949	1.011	1.17985e+06	1.16623e+06	1.07289e+06	1.11436e+06	903907	932264	867318	1.0875e+06	1.17985e+06	1.0846e+06	1.0608e+06	1.02418e+06	993524	4.18409	3.61307	4.84875	3.28254	1.33463e+06	1.14256e+06	1.23554e+06	1.06944e+06	1.08712e+06	984229	1.89254e+06	2.03797e+06	1.784e+06	1.12248e+06	1.02418e+06	1.04537e+06	1.23758e+06	1.04693e+06	1.90483e+06	1.06401e+06	96051.1	55016.2	127428	51732.6	1.16313	0.98395	1.79025	0.21801	-0.0233424	0.840157	0.0510774	0.715277	0.000450063
		849.534	12.978	833068	833068	789637	812774	594959	529003	527158	676816	696640	702264	642895	770064	824355	2.6768	7.01767	1.9321	12.4887	953359	840919	901160	703915	616876	598217	1.17784e+06	1.20331e+06	1.15511e+06	680272	770064	867368	898479	639669	1.17875e+06	772568	56267.9	56415.4	24110.8	93573.6	1.16298	0.827978	1.52576	0.217823	-0.272335	0.609528	0.116472	0.102873	0.00189114
		479.783	1.624	1.03545e+07	7.92231e+06	4.69e+06	2.3923e+06	1.03545e+07	3.87064e+06	2.32813e+06	8.08794e+06	2.75272e+06	2.25668e+06	9.14631e+06	3.05149e+06	1.57929e+06	55.5456	77.1901	74.0535	87.3612	9.06626e+06	4.99458e+06	2.65246e+06	1.22508e+07	4.51359e+06	2.64195e+06	1.40751e+07	4.75478e+06	3.71187e+06	9.67806e+06	3.05149e+06	1.66169e+06	5.5711e+06	6.46876e+06	7.51393e+06	4.79708e+06	3.24553e+06	5.09405e+06	5.70605e+06	4.28379e+06	1.16135	1.34848	1.56636	0.215806	0.431334	0.647413	0.8153	0.685988	0.545601
		484.351	8.807	5.74603e+06	5.29594e+06	5.39577e+06	4.14891e+06	3.48641e+06	3.09982e+06	2.60801e+06	3.39201e+06	2.37303e+06	2.02002e+06	5.74603e+06	4.22617e+06	3.65648e+06	14.0059	14.365	27.4534	23.7774	6.06065e+06	5.74619e+06	4.60009e+06	4.12488e+06	3.61473e+06	2.95955e+06	5.90299e+06	4.09895e+06	3.32262e+06	6.08009e+06	4.22617e+06	3.84727e+06	5.46898e+06	3.56639e+06	4.44152e+06	4.71784e+06	768729	584167	1.32386e+06	1.19486e+06	1.15921	0.755936	0.94143	0.213143	-0.403663	-0.0870745	0.411638	0.208118	0.80168
		320.88	1.026	8.54382e+06	6.44933e+06	8.54382e+06	5.29751e+06	3.34778e+06	3.29153e+06	5.91912e+06	5.12442e+06	5.02127e+06	5.3831e+06	4.19381e+06	7.5695e+06	6.95057e+06	24.3334	35.8579	3.60116	28.8096	7.38058e+06	9.09868e+06	5.87359e+06	3.96087e+06	3.83829e+06	6.71698e+06	8.91784e+06	8.67324e+06	8.85434e+06	4.43763e+06	7.5695e+06	7.31324e+06	7.45095e+06	4.83871e+06	8.81514e+06	6.44012e+06	1.6137e+06	1.62779e+06	126922	1.73894e+06	1.15696	0.751338	1.36878	0.210336	-0.412465	0.452896	0.501462	0.308944	0.0777194
		598.382	13.006	4.71406e+06	4.71406e+06	4.38688e+06	4.68826e+06	2.98808e+06	3.19313e+06	2.88459e+06	3.59685e+06	3.97647e+06	3.56262e+06	4.49113e+06	4.39031e+06	3.85769e+06	3.95764	5.19631	6.18788	8.01546	5.39475e+06	4.67178e+06	5.19808e+06	3.53529e+06	3.72354e+06	3.27343e+06	6.25947e+06	6.86857e+06	5.85994e+06	4.75224e+06	4.39031e+06	4.05898e+06	5.0882e+06	3.51075e+06	6.32933e+06	4.40051e+06	373801	226059	507928	346741	1.15628	0.797806	1.43832	0.209486	-0.325889	0.524382	0.0797111	0.0204183	0.00557158
		155.935	1.204	3.66468e+06	2.3833e+06	3.08135e+06	3.0738e+06	1.79875e+06	2.49022e+06	2.69232e+06	3.66468e+06	2.22011e+06	3.0181e+06	2.33342e+06	2.55064e+06	2.98574e+06	14.0843	20.136	24.3833	12.6624	2.72743e+06	3.28146e+06	3.40807e+06	2.12816e+06	2.90387e+06	3.05523e+06	6.37751e+06	3.8348e+06	4.9643e+06	2.46908e+06	2.55064e+06	3.14153e+06	3.13899e+06	2.69575e+06	5.05887e+06	2.72042e+06	361994	497341	1.27399e+06	366970	1.15386	0.990933	1.85959	0.20647	-0.0131405	0.894986	0.232321	0.94821	0.037842
		511.866	1.279	3.51645e+06	2.07767e+06	3.40373e+06	3.10705e+06	2.10835e+06	3.24797e+06	3.04149e+06	3.51645e+06	1.76067e+06	3.11055e+06	1.73719e+06	3.23324e+06	2.9658e+06	24.31	21.6913	32.8773	30.159	2.37767e+06	3.62478e+06	3.44493e+06	2.49445e+06	3.78749e+06	3.45147e+06	6.11956e+06	3.04121e+06	5.11636e+06	1.83818e+06	3.23324e+06	3.12055e+06	3.14912e+06	3.24447e+06	4.75904e+06	2.73066e+06	674123	670911	1.56997e+06	774956	1.15325	1.18816	1.74282	0.205702	0.248734	0.801423	0.519327	0.434262	0.11524
	C9 H8 O	132.058	13.888	2.36359e+06	1.12058e+06	1.17778e+06	1.27144e+06	914774	912196	911463	1.59491e+06	1.48913e+06	2.36359e+06	1.23091e+06	1.09374e+06	986542	6.40034	0.190491	26.2834	11.0978	1.28238e+06	1.25427e+06	1.4097e+06	1.0823e+06	1.06372e+06	1.03432e+06	2.77557e+06	2.57218e+06	3.88773e+06	1.30247e+06	1.09374e+06	1.03802e+06	1.31545e+06	1.06011e+06	3.07849e+06	1.14474e+06	82823.5	24189.1	708162	139409	1.14912	0.926073	2.68925	0.200534	-0.110803	1.4272	0.142315	0.35874	0.00972978
		471.283	15.596	699020	657028	699020	667560	441600	367275	394943	521046	576886	530772	660330	618752	601297	3.23895	9.36133	5.4947	4.83838	751900	744417	740154	522471	428284	448180	906757	996457	873035	698720	618752	632672	745491	466311	925416	650048	5945.91	49642.7	63791.6	42721.8	1.14682	0.717349	1.42361	0.197644	-0.479252	0.509556	0.0185775	0.00828505	0.00341679
		533.848	1.264	1.2356e+07	1.2356e+07	9.35654e+06	8.78035e+06	1.095e+07	1.09354e+07	1.03145e+07	1.08243e+07	9.32486e+06	9.16331e+06	1.0322e+07	9.16571e+06	9.01475e+06	18.888	3.37977	9.37402	7.52718	1.41402e+07	9.96419e+06	9.73517e+06	1.29553e+07	1.27519e+07	1.17049e+07	1.88372e+07	1.61068e+07	1.50722e+07	1.09221e+07	9.16571e+06	9.48513e+06	1.12799e+07	1.24707e+07	1.66721e+07	9.85763e+06	2.47978e+06	670969	1.94509e+06	935561	1.14428	1.26508	1.69128	0.194435	0.339227	0.758119	0.405277	0.0170861	0.00544005
		459.246	13.601	2.76866e+06	2.14874e+06	2.20981e+06	2.05208e+06	1.55585e+06	1.46688e+06	1.4959e+06	2.76866e+06	2.55144e+06	2.51331e+06	2.12691e+06	1.8623e+06	1.98592e+06	3.72201	3.01227	5.27532	6.64759	2.459e+06	2.35333e+06	2.27523e+06	1.84077e+06	1.71054e+06	1.69754e+06	4.81819e+06	4.4071e+06	4.13399e+06	2.25056e+06	1.8623e+06	2.08955e+06	2.36252e+06	1.74962e+06	4.4531e+06	2.06747e+06	92230.1	79209.1	344413	195072	1.14271	0.846262	2.15389	0.192461	-0.240824	1.10694	0.0769555	0.0591179	0.00047575
		217.935	1.25	9.10879e+07	9.10879e+07	7.4766e+07	6.99134e+07	8.24799e+07	7.36435e+07	7.18392e+07	7.4904e+07	7.13178e+07	7.53722e+07	7.83554e+07	7.01677e+07	7.21198e+07	14.115	7.49397	3.00281	5.81459	1.04241e+08	7.96215e+07	7.75162e+07	9.75846e+07	8.58764e+07	8.15227e+07	1.30353e+08	1.23188e+08	1.23975e+08	8.29108e+07	7.01677e+07	7.5883e+07	8.71261e+07	8.83279e+07	1.25839e+08	7.63205e+07	1.48589e+07	8.3068e+06	3.92925e+06	6.38279e+06	1.14158	1.15733	1.64882	0.191034	0.210799	0.721431	0.311547	0.118086	0.00033282
		99.9963	1.408	3.46459e+08	3.46459e+08	2.11991e+08	3.02599e+08	3.29418e+08	2.05473e+08	1.94376e+08	3.27087e+08	3.30924e+08	2.99317e+08	2.68616e+08	2.98699e+08	2.43594e+08	23.8924	30.84	5.40503	10.2076	3.96486e+08	2.25758e+08	3.35505e+08	3.89745e+08	2.39604e+08	2.20577e+08	5.69218e+08	5.71606e+08	4.92328e+08	2.84233e+08	2.98699e+08	2.56304e+08	3.19249e+08	2.83309e+08	5.44384e+08	2.79745e+08	8.65168e+07	9.26661e+07	4.50975e+07	2.15508e+07	1.14121	1.01274	1.946	0.19057	0.0182605	0.960511	0.485626	0.951389	0.000785038
		554.356	13.241	821336	773936	778495	821336	547015	536782	538788	417281	402499	364445	737296	759729	727696	3.30483	1.00252	6.90551	2.21684	885689	829053	910652	647191	625947	611415	726179	695237	599454	780161	759729	765666	875131	628184	673623	768519	41811.3	17992.6	66069.7	10510.2	1.13873	0.817396	0.876522	0.187419	-0.290892	-0.190138	0.0128148	0.000308776	0.0699291
		405.9	1.545	1.64313e+07	1.64313e+07	1.08981e+07	4.98064e+06	7.63469e+06	8.49106e+06	6.17443e+06	1.38578e+07	9.85069e+06	4.98434e+06	1.53444e+07	9.20426e+06	5.917e+06	53.1699	15.7581	46.4609	47.1195	1.88039e+07	1.16059e+07	5.52226e+06	9.03284e+06	9.90151e+06	7.00671e+06	2.41162e+07	1.70151e+07	8.19845e+06	1.62364e+07	9.20426e+06	6.22574e+06	1.19774e+07	8.64702e+06	1.64433e+07	1.05555e+07	6.64862e+06	1.48547e+06	7.97427e+06	5.14032e+06	1.13471	0.819197	1.55779	0.182318	-0.287717	0.639504	0.78406	0.570154	0.342942
		103.018	14.12	831687	691433	651013	708025	660110	260955	447370	54517.3	76198.9	76669.9	831687	798339	306864	4.29035	43.7847	18.308	45.5142	791272	693292	785019	780997	304303	507674	94874.4	131619	126110	880040	798339	322876	756528	530991	117534	667085	54853	239201	19816.3	300880	1.13408	0.795988	0.176191	0.181523	-0.329182	-2.50479	0.639123	0.572864	0.0342921
		375.298	16.67	1.71693e+06	11351.7	834010	725946	873714	777186	852475	1.65284e+06	1.71693e+06	1.56598e+06	524992	463729	463841	85.3513	6.07862	4.60475	7.29845	12990.8	888173	804889	1.03372e+06	906284	967385	2.87638e+06	2.96566e+06	2.5758e+06	555514	463729	488044	568684	969129	2.80595e+06	502429	483043	63735.1	204255	47553.5	1.13187	1.92889	5.58476	0.178708	0.947769	2.4815	0.824713	0.000527424	4.49699e-05
		204.061	1.257	2.54631e+06	2.46229e+06	2.38768e+06	2.36183e+06	2.09633e+06	1.80775e+06	1.83375e+06	2.54631e+06	2.26656e+06	2.35538e+06	2.29381e+06	2.30098e+06	2.20656e+06	2.16998	8.34649	5.98267	2.31861	2.81784e+06	2.54274e+06	2.61867e+06	2.48023e+06	2.10803e+06	2.08094e+06	4.43126e+06	3.91503e+06	3.87422e+06	2.42717e+06	2.30098e+06	2.3217e+06	2.65975e+06	2.22307e+06	4.0735e+06	2.34995e+06	142073	223125	310496	67674.5	1.13183	0.946007	1.73344	0.178661	-0.0800774	0.79364	0.0270325	0.399284	0.000715537
		336.227	16.695	3.80487e+06	28793	2.59913e+06	2.96975e+06	2.97533e+06	3.08763e+06	3.68879e+06	3.12675e+06	3.34542e+06	3.80487e+06	1.67432e+06	1.73713e+06	1.81354e+06	85.8426	11.802	10.1034	4.00307	32950.6	2.76793e+06	3.29269e+06	3.5202e+06	3.60051e+06	4.18603e+06	5.44137e+06	5.77855e+06	6.2584e+06	1.77167e+06	1.73713e+06	1.90817e+06	2.03119e+06	3.76891e+06	5.82611e+06	1.80565e+06	1.7503e+06	363455	410587	90446	1.12491	2.08728	3.22659	0.169804	1.06163	1.69001	0.834543	0.000815939	7.78227e-05
		97.9756	1.261	2.23433e+08	1.28924e+08	2.23433e+08	1.99855e+08	1.23045e+08	1.97076e+08	2.16123e+08	1.35557e+08	1.31175e+08	1.87139e+08	1.27368e+08	1.90344e+08	2.04641e+08	26.7244	27.5085	20.5716	23.6121	1.4754e+08	2.37944e+08	2.21588e+08	1.45579e+08	2.29812e+08	2.45255e+08	2.35905e+08	2.26579e+08	3.07814e+08	1.34773e+08	1.90344e+08	2.15319e+08	2.02357e+08	2.06882e+08	2.56766e+08	1.80145e+08	4.81721e+07	5.36486e+07	4.44538e+07	4.12303e+07	1.1233	1.14842	1.42533	0.167745	0.199648	0.511294	0.576768	0.531302	0.093813
		99.9963	1.642	1.67648e+08	9.97985e+07	1.67648e+08	1.1811e+08	1.13711e+08	1.02293e+08	1.10983e+08	1.12527e+08	1.26407e+08	1.26479e+08	1.14649e+08	1.17431e+08	1.31621e+08	27.3127	5.47046	6.59614	7.50796	1.14209e+08	1.78535e+08	1.30954e+08	1.34535e+08	1.19285e+08	1.25943e+08	1.95827e+08	2.18343e+08	2.08038e+08	1.21315e+08	1.17431e+08	1.38488e+08	1.41233e+08	1.26588e+08	2.07403e+08	1.25745e+08	3.33725e+07	7.64543e+06	1.12714e+07	1.12058e+07	1.12317	1.0067	1.64939	0.167575	0.00963966	0.721937	0.488505	0.919468	0.000881296
		867.508	15.396	655251	534195	591892	655251	305212	423231	383310	410823	457809	467258	541571	524715	622387	10.1974	16.1988	6.7879	9.27525	611330	630332	726506	361106	493534	434978	714941	790775	768564	573057	524715	654862	656056	429873	758093	584212	61746.9	66361.8	38986.3	65786.6	1.12298	0.735817	1.29763	0.167328	-0.442582	0.375885	0.239929	0.0458932	0.0169829
		837.534	13.173	595728	595728	524188	569647	396276	373003	346641	367616	338473	324906	536616	564689	510550	6.42859	6.67618	6.35015	5.03935	681749	558230	631594	468847	434962	393367	639749	584645	534419	567813	564689	537190	623858	432392	586271	556564	62121.4	37805.7	52683.8	16850.9	1.12091	0.776895	1.05338	0.164668	-0.364208	0.0750192	0.14441	0.00653359	0.404913
		163.922	1.17	2.69558e+07	1.8458e+07	2.6385e+07	2.69558e+07	1.55557e+07	1.85723e+07	2.27313e+07	1.94184e+07	2.59584e+07	2.52094e+07	2.53772e+07	1.79841e+07	2.47683e+07	19.8472	19.0096	15.2123	18.071	2.11232e+07	2.80985e+07	2.98871e+07	1.84045e+07	2.16573e+07	2.57954e+07	3.37932e+07	4.48379e+07	4.14655e+07	2.68526e+07	1.79841e+07	2.60607e+07	2.63696e+07	2.19524e+07	4.00322e+07	2.36325e+07	4.63069e+06	3.70428e+06	5.66014e+06	4.90758e+06	1.11582	0.928909	1.69395	0.158108	-0.106391	0.760392	0.521026	0.660695	0.0192407
		346.196	13.855	1.42314e+06	958316	1.01313e+06	1.04523e+06	939957	1.05429e+06	996628	1.16001e+06	1.42314e+06	1.07741e+06	934610	1.02908e+06	923352	4.37067	5.73425	14.7972	6.03398	1.09669e+06	1.07892e+06	1.1589e+06	1.11209e+06	1.22942e+06	1.13097e+06	2.01872e+06	2.4582e+06	1.77216e+06	988947	1.02908e+06	971531	1.1115e+06	1.15749e+06	2.08303e+06	996520	41993.3	63000.9	347510	29514.5	1.11538	1.16154	2.0903	0.157542	0.216034	1.06371	0.0178397	0.0160286	0.0057077
		166.956	1.026	3.70941e+07	2.95564e+07	3.14205e+07	2.76563e+07	3.26308e+07	2.9128e+07	2.17951e+07	3.70941e+07	2.70248e+07	3.09794e+07	3.2932e+07	2.39602e+07	2.76533e+07	6.37055	19.8537	16.0038	16.0003	3.38241e+07	3.34611e+07	3.06638e+07	3.86065e+07	3.39664e+07	2.4733e+07	6.45535e+07	4.668e+07	5.09561e+07	3.48466e+07	2.39602e+07	2.90962e+07	3.26497e+07	3.24353e+07	5.40632e+07	2.9301e+07	1.72937e+06	7.06238e+06	9.33305e+06	5.44607e+06	1.11429	1.10697	1.8451	0.156119	0.146616	0.883697	0.367485	0.575583	0.0165511
		170.142	1.541	1.94517e+06	1.87502e+06	1.47827e+06	1.22542e+06	1.54758e+06	1.19858e+06	880639	1.91306e+06	1.41718e+06	1.14358e+06	1.94517e+06	1.40263e+06	1.0624e+06	21.4545	27.5938	26.1561	30.2865	2.14577e+06	1.57428e+06	1.35868e+06	1.83099e+06	1.39767e+06	999345	3.32924e+06	2.4479e+06	1.881e+06	2.05826e+06	1.40263e+06	1.11784e+06	1.69291e+06	1.40933e+06	2.55271e+06	1.52624e+06	406733	415944	729786	482244	1.1092	0.923401	1.67255	0.149517	-0.114971	0.742046	0.671008	0.76642	0.111892
		335.926	13.954	1.68136e+06	1.68136e+06	1.42762e+06	687013	1.37403e+06	1.33752e+06	1.13731e+06	821948	315842	445602	1.16656e+06	1.43099e+06	1.07504e+06	40.8318	9.93346	49.8059	15.0988	1.92414e+06	1.52034e+06	761722	1.62566e+06	1.55969e+06	1.29062e+06	1.43041e+06	545554	732945	1.23438e+06	1.43099e+06	1.13113e+06	1.40207e+06	1.49199e+06	902968	1.2655e+06	590165	177484	466285	152328	1.10791	1.17897	0.713526	0.147846	0.23753	-0.486962	0.717725	0.168799	0.269713
		336.227	16.412	2.75166e+06	25873.6	1.57974e+06	2.05854e+06	2.09917e+06	1.87542e+06	1.90337e+06	2.27824e+06	2.75166e+06	2.66259e+06	1.25991e+06	1.2771e+06	948411	87.0046	6.22251	9.81188	15.924	29609.7	1.68233e+06	2.2824e+06	2.4836e+06	2.18694e+06	2.15994e+06	3.96474e+06	4.75296e+06	4.37954e+06	1.33316e+06	1.2771e+06	997898	1.33145e+06	2.27683e+06	4.36574e+06	1.20272e+06	1.16666e+06	179577	394291	179581	1.10703	1.89307	3.6299	0.146696	0.920725	1.85993	0.859378	0.00184792	0.000225216
		156.028	1.525	1.98688e+08	1.71757e+08	1.6156e+08	1.67889e+08	1.78135e+08	1.98688e+08	1.61521e+08	1.85307e+08	9.36578e+07	1.55008e+08	1.73085e+08	1.53865e+08	1.57612e+08	3.08114	10.3754	32.2783	6.30807	1.96558e+08	1.72052e+08	1.86146e+08	2.10757e+08	2.31693e+08	1.83294e+08	3.22483e+08	1.61775e+08	2.54963e+08	1.83148e+08	1.53865e+08	1.65835e+08	1.84919e+08	2.08581e+08	2.46407e+08	1.67616e+08	1.22987e+07	2.42728e+07	8.06945e+07	1.47224e+07	1.10323	1.2444	1.47007	0.141729	0.315446	0.555881	0.193269	0.0668132	0.1715
		457.854	1.218	1.30994e+07	1.2484e+07	1.19396e+07	1.15774e+07	9.37117e+06	1.12815e+07	1.07693e+07	1.30994e+07	1.138e+07	1.14465e+07	1.14219e+07	1.20122e+07	1.14806e+07	3.80307	9.44056	8.13405	2.79431	1.42867e+07	1.2715e+07	1.28364e+07	1.10873e+07	1.31555e+07	1.22209e+07	2.27965e+07	1.96567e+07	1.88277e+07	1.2086e+07	1.20122e+07	1.20796e+07	1.32793e+07	1.21546e+07	2.0427e+07	1.20593e+07	874489	1.03566e+06	2.09349e+06	40861.8	1.10117	1.0079	1.69388	0.13904	0.0113555	0.760331	0.0732466	0.881192	0.00228646
		355.955	16.046	2.54333e+06	1.41221e+06	2.25644e+06	2.35784e+06	609379	1.07831e+06	1.11529e+06	1.87556e+06	2.53565e+06	2.54333e+06	1.70942e+06	1.97171e+06	2.15114e+06	25.8443	30.1842	16.5363	11.4272	1.61613e+06	2.40298e+06	2.61424e+06	720975	1.25743e+06	1.26563e+06	3.26397e+06	4.37984e+06	4.18338e+06	1.8088e+06	1.97171e+06	2.26339e+06	2.21112e+06	1.08134e+06	3.94239e+06	2.01463e+06	525991	312114	595691	230314	1.09753	0.536744	1.95688	0.134259	-0.897693	0.968556	0.585276	0.0140605	0.00639211
		555.83	1.247	8.611e+06	8.30877e+06	8.1921e+06	8.48457e+06	7.24391e+06	7.29189e+06	7.21093e+06	7.89314e+06	8.33604e+06	8.611e+06	8.03764e+06	8.43344e+06	7.8705e+06	1.7678	0.561643	4.37426	3.56312	9.50851e+06	8.72412e+06	9.40723e+06	8.5705e+06	8.50315e+06	8.18293e+06	1.37361e+07	1.43989e+07	1.41637e+07	8.50493e+06	8.43344e+06	8.28118e+06	9.21329e+06	8.41886e+06	1.40996e+07	8.40652e+06	426645	207078	335982	114279	1.09597	1.00147	1.67722	0.132208	0.0021169	0.746072	0.034062	0.932317	9.98012e-06
		159.932	1.25	2.9424e+07	9.93305e+06	2.47023e+07	2.22029e+07	9.85746e+06	2.10591e+07	2.18697e+07	1.09343e+07	1.32484e+07	2.38153e+07	1.03477e+07	2.9424e+07	1.56871e+07	41.7232	38.1549	42.9205	53.2363	1.13673e+07	2.63065e+07	2.46173e+07	1.16627e+07	2.45572e+07	2.48176e+07	1.90286e+07	2.2884e+07	3.91724e+07	1.09492e+07	2.9424e+07	1.65056e+07	2.07637e+07	2.03459e+07	2.70283e+07	1.89596e+07	8.18123e+06	7.52098e+06	1.06923e+07	9.47868e+06	1.09516	1.07312	1.42557	0.131137	0.101805	0.511543	0.815216	0.852384	0.38342
		598.382	13.171	8.01216e+06	7.65434e+06	7.95646e+06	7.21387e+06	5.84999e+06	5.55398e+06	5.31925e+06	7.60989e+06	6.82122e+06	6.69988e+06	8.01216e+06	7.04406e+06	7.19674e+06	4.90832	4.77111	7.0149	7.01689	8.75959e+06	8.47318e+06	7.99834e+06	6.92131e+06	6.47655e+06	6.03626e+06	1.32432e+07	1.17823e+07	1.10202e+07	8.47797e+06	7.04406e+06	7.57226e+06	8.41037e+06	6.47804e+06	1.20153e+07	7.6981e+06	384489	442528	1.12965e+06	725193	1.09253	0.841512	1.56081	0.127667	-0.248944	0.642293	0.207262	0.0676701	0.00508912
		698.398	13.463	1.92902e+06	1.76337e+06	1.81974e+06	1.78006e+06	1.43528e+06	1.42305e+06	1.36805e+06	1.71641e+06	1.6098e+06	1.60596e+06	1.75052e+06	1.92902e+06	1.58433e+06	1.61981	2.54206	3.81327	9.82434	2.01799e+06	1.93792e+06	1.97363e+06	1.69812e+06	1.65943e+06	1.55245e+06	2.98701e+06	2.78061e+06	2.64154e+06	1.85229e+06	1.92902e+06	1.667e+06	1.97651e+06	1.63667e+06	2.80306e+06	1.8161e+06	40112	75455.8	173825	134706	1.08833	0.901199	1.54345	0.122114	-0.150082	0.626156	0.119236	0.114424	0.00147655
		301.999	13.191	2.79384e+06	8632.98	3794.79	5195.89	292222	122533	97540.6	2.79384e+06	970916	792812	10891.1	3705.66	2716.76	42.3772	62.0291	72.8984	77.306	9879.54	4041.24	5760.92	345737	142887	110689	4.86202e+06	1.67707e+06	1.30405e+06	11524.3	3705.66	2858.52	6560.57	199771	2.61438e+06	6029.48	3000.17	127431	1.95543e+06	4777.43	1.08808	33.1324	433.599	0.121787	5.05017	8.76022	0.878379	0.0580952	0.0819981
		97.9773	1.261	1.07906e+08	1.07906e+08	9.00957e+07	8.56848e+07	1.02912e+08	8.9861e+07	9.42326e+07	1.01866e+08	9.4507e+07	9.10092e+07	9.37592e+07	9.32643e+07	9.17605e+07	12.441	6.94367	5.78487	1.12013	1.23487e+08	9.59469e+07	9.50026e+07	1.21758e+08	1.04788e+08	1.06935e+08	1.77273e+08	1.63242e+08	1.49696e+08	9.92101e+07	9.32643e+07	9.65484e+07	1.04812e+08	1.1116e+08	1.63404e+08	9.6341e+07	1.61796e+07	9.24077e+06	1.37896e+07	2.97834e+06	1.08793	1.15382	1.6961	0.121583	0.206421	0.76222	0.42287	0.0573545	0.00118644
		148.945	1.025	4.83582e+07	3.86644e+07	3.76418e+07	3.7825e+07	4.13184e+07	3.70294e+07	2.98716e+07	4.83582e+07	3.68008e+07	3.74166e+07	4.4142e+07	3.3135e+07	3.49893e+07	1.43333	16.0314	15.914	15.7474	4.42474e+07	4.00864e+07	4.19383e+07	4.88851e+07	4.31804e+07	3.38981e+07	8.41561e+07	6.35661e+07	6.15443e+07	4.67084e+07	3.3135e+07	3.6815e+07	4.20907e+07	4.19878e+07	6.97555e+07	3.88861e+07	2.0847e+06	7.56431e+06	1.25122e+07	7.0197e+06	1.08241	1.07976	1.79384	0.114246	0.110716	0.843051	0.490667	0.630139	0.020354
		557.797	1.648	7.10499e+06	4.9169e+06	3.10991e+06	1.61356e+06	7.10499e+06	2.61666e+06	1.52116e+06	5.54479e+06	1.84612e+06	1.48073e+06	6.29982e+06	2.07629e+06	1.1282e+06	51.4742	78.9498	76.0292	86.9057	5.62687e+06	3.31188e+06	1.78903e+06	8.40614e+06	3.05131e+06	1.72621e+06	9.64941e+06	3.1888e+06	2.43556e+06	6.66608e+06	2.07629e+06	1.18707e+06	3.57593e+06	4.39455e+06	5.09126e+06	3.30981e+06	1.9325e+06	3.53675e+06	3.9654e+06	2.94042e+06	1.0804	1.32774	1.53823	0.111568	0.408968	0.621273	0.902103	0.703835	0.565838
		573.278	14.864	491623	451192	461402	440178	294947	316479	312742	461123	491623	483561	442361	458280	436464	2.35397	3.73497	3.30105	2.53196	516342	491367	488045	348961	369049	354899	802476	849181	795382	468079	458280	459239	498585	357636	815680	461866	15467.6	10320.3	29229.3	5402.1	1.0795	0.774329	1.76605	0.110365	-0.368982	0.820528	0.0178136	0.000101179	3.26948e-05
		440.324	12.152	1.27935e+06	1.14592e+06	1.27935e+06	1.2628e+06	747930	762124	733685	725966	740220	678922	1.22654e+06	1.20432e+06	1.21167e+06	5.91614	1.90124	4.48607	0.932341	1.31139e+06	1.36244e+06	1.40013e+06	884900	888721	832582	1.26337e+06	1.27858e+06	1.11672e+06	1.29785e+06	1.20432e+06	1.27489e+06	1.35799e+06	868734	1.21956e+06	1.25902e+06	44537.3	31366.9	89385.4	48742.2	1.07861	0.69001	0.968659	0.10917	-0.535311	-0.0459394	0.0602865	0.000309026	0.538809
		203.005	1.021	5.68996e+06	5.68996e+06	2.78084e+06	3.05707e+06	2.40632e+06	3.69943e+06	2.55844e+06	2.99228e+06	2.85443e+06	5.10714e+06	4.26553e+06	4.29143e+06	2.99113e+06	41.7889	24.472	34.5822	19.3114	6.51157e+06	2.96144e+06	3.38952e+06	2.847e+06	4.31394e+06	2.9033e+06	5.20736e+06	4.93046e+06	8.40043e+06	4.51352e+06	4.29143e+06	3.1472e+06	4.28751e+06	3.35475e+06	6.17942e+06	3.98405e+06	1.93795e+06	831164	1.92843e+06	733192	1.07617	0.842044	1.55104	0.105903	-0.248032	0.633235	0.812256	0.381067	0.1391
		97.9766	1.267	2.23381e+08	9.66254e+07	2.20954e+08	1.84193e+08	9.37905e+07	1.20516e+08	1.75081e+08	1.00874e+08	1.93788e+08	2.13037e+08	9.41587e+07	2.23381e+08	1.81525e+08	38.1873	31.9212	35.4408	39.6341	1.10578e+08	2.35303e+08	2.04223e+08	1.10967e+08	1.40535e+08	1.98682e+08	1.75548e+08	3.3473e+08	3.50411e+08	9.96328e+07	2.23381e+08	1.90997e+08	1.83368e+08	1.50061e+08	2.86896e+08	1.71337e+08	6.49256e+07	4.46267e+07	9.67488e+07	6.41738e+07	1.07022	0.875824	1.67446	0.0979068	-0.191287	0.743695	0.830629	0.661884	0.159795
		337.895	1.237	2.63904e+07	2.55802e+07	2.35094e+07	2.36266e+07	2.16488e+07	2.27288e+07	2.14239e+07	2.63904e+07	2.39894e+07	2.35294e+07	2.49833e+07	2.35584e+07	2.39987e+07	4.79887	3.18021	6.23606	3.01716	2.92738e+07	2.50362e+07	2.61959e+07	2.56134e+07	2.65042e+07	2.43118e+07	4.59263e+07	4.1437e+07	3.8702e+07	2.64358e+07	2.35584e+07	2.52509e+07	2.68353e+07	2.54765e+07	4.20218e+07	2.50817e+07	2.18996e+06	1.10263e+06	3.64745e+06	1.4461e+06	1.06992	1.01574	1.6754	0.0974973	0.0225306	0.744501	0.311525	0.726006	0.00170975
		315.913	1.268	6.06269e+07	5.64467e+07	6.06269e+07	5.76896e+07	5.30797e+07	5.63166e+07	5.40442e+07	4.07854e+07	5.8459e+07	5.95933e+07	5.80246e+07	5.70888e+07	5.89598e+07	3.68481	3.05045	19.9195	1.61225	6.45973e+07	6.45642e+07	6.39631e+07	6.28003e+07	6.56713e+07	6.13291e+07	7.09773e+07	1.00976e+08	9.80214e+07	6.1398e+07	5.70888e+07	6.20362e+07	6.43748e+07	6.32669e+07	8.99917e+07	6.01743e+07	356981	2.20838e+06	1.65331e+07	2.69117e+06	1.06981	1.05139	1.49552	0.0973486	0.0723025	0.580644	0.0552295	0.19872	0.036818
		113.992	1.128	8.97889e+06	7.63722e+06	7.39909e+06	7.4063e+06	8.97889e+06	8.2304e+06	7.89519e+06	7.65406e+06	7.39103e+06	7.50049e+06	7.50345e+06	7.51404e+06	7.40014e+06	1.81061	6.63022	1.7582	0.842095	8.74e+06	7.87962e+06	8.2117e+06	1.06232e+07	9.59756e+06	8.95942e+06	1.33201e+07	1.27665e+07	1.23371e+07	7.93968e+06	7.51404e+06	7.78627e+06	8.2771e+06	9.72673e+06	1.28079e+07	7.74667e+06	433902	839379	492798	215564	1.06847	1.2556	1.65335	0.0955507	0.328379	0.725388	0.130798	0.0167137	8.29483e-05
		484.35	11.93	6.38668e+06	6.14913e+06	5.89038e+06	5.9601e+06	4.00458e+06	4.15027e+06	3.84571e+06	4.25858e+06	3.8009e+06	3.81288e+06	6.38668e+06	5.77119e+06	5.87109e+06	2.23138	3.80812	6.59135	5.4964	7.03703e+06	6.27293e+06	6.60823e+06	4.73794e+06	4.83968e+06	4.36409e+06	7.41105e+06	6.56531e+06	6.27158e+06	6.75799e+06	5.77119e+06	6.17743e+06	6.6394e+06	4.64724e+06	6.74931e+06	6.23554e+06	383007	250432	591598	495959	1.06477	0.745283	1.08239	0.0905388	-0.42414	0.114227	0.326825	0.00775331	0.313224
		273.266	16.463	2.05657e+06	402856	436697	551714	360030	353438	394998	1.83767e+06	2.0247e+06	2.05657e+06	434661	502466	458679	16.8258	6.0451	5.99401	7.38915	461027	465058	611710	425962	412148	448241	3.19803e+06	3.49727e+06	3.38272e+06	459931	502466	482612	512598	428784	3.35934e+06	481670	85857	18211.4	150987	21283	1.06421	0.890203	6.97437	0.0897841	-0.167793	2.80206	0.577455	0.0307844	5.22257e-06
		784.205	14.112	2.55686e+06	2.27952e+06	2.20666e+06	2.08321e+06	2.03088e+06	2.55686e+06	1.77347e+06	308255	348294	325202	2.2915e+06	2.3277e+06	1.98052e+06	4.53164	18.831	6.14134	8.67564	2.60867e+06	2.34997e+06	2.30975e+06	2.4028e+06	2.98158e+06	2.01252e+06	536446	601609	534906	2.42472e+06	2.3277e+06	2.08386e+06	2.4228e+06	2.46563e+06	557653	2.27876e+06	162222	487573	38074.1	175623	1.06321	1.08201	0.244718	0.0884246	0.11371	-2.03081	0.355631	0.566112	7.73482e-05
		800.183	14.115	6.79732e+06	6.41813e+06	6.49633e+06	6.28835e+06	4.86433e+06	6.24631e+06	6.45527e+06	941315	1.02718e+06	877204	6.79732e+06	6.2535e+06	6.20853e+06	1.64117	14.7651	7.93283	5.10497	7.34488e+06	6.91822e+06	6.97218e+06	5.75515e+06	7.28389e+06	7.32541e+06	1.63814e+06	1.77424e+06	1.44286e+06	7.1925e+06	6.2535e+06	6.53249e+06	7.07843e+06	6.78815e+06	1.61841e+06	6.65949e+06	232325	894846	166569	482213	1.06291	1.01932	0.243024	0.0880159	0.0276052	-2.04083	0.246708	0.837214	6.83689e-05
	C15 H20 O6	296.126	18.721	1.53329e+06	1.26323e+06	1.46824e+06	1.42653e+06	294407	294640	260844	1.0854e+06	1.13023e+06	1.00889e+06	1.53329e+06	1.48249e+06	1.15861e+06	7.81753	6.86389	5.70814	14.607	1.44563e+06	1.56359e+06	1.58166e+06	348322	343583	296005	1.88888e+06	1.95225e+06	1.65947e+06	1.62243e+06	1.48249e+06	1.21906e+06	1.53029e+06	329303	1.83353e+06	1.44133e+06	73876.7	28934.6	154038	204809	1.06172	0.228472	1.27211	0.0864097	-2.12991	0.347227	0.518166	0.000740181	0.0569352
		133.952	1.244	3.77293e+06	3.13416e+06	3.77293e+06	3.40603e+06	2.87178e+06	3.56353e+06	3.33758e+06	3.2626e+06	3.46734e+06	3.51388e+06	3.39491e+06	3.57205e+06	3.43649e+06	9.3248	10.828	3.91502	2.67121	3.58672e+06	4.01795e+06	3.77642e+06	3.39769e+06	4.15547e+06	3.78747e+06	5.67779e+06	5.98914e+06	5.77978e+06	3.59228e+06	3.57205e+06	3.6158e+06	3.7937e+06	3.78021e+06	5.81557e+06	3.59338e+06	216137	378939	158733	21895	1.05575	1.05199	1.61841	0.0782636	0.0731251	0.694579	0.185478	0.441953	1.78163e-05
	C15 H20 O6	296.125	18.8	1.42653e+06	1.26323e+06	1.39026e+06	1.42653e+06	319833	298653	262200	1.0854e+06	1.06072e+06	1.21503e+06	1.34001e+06	1.36784e+06	1.41222e+06	6.30546	9.9303	7.39826	2.6517	1.44563e+06	1.48055e+06	1.58166e+06	378405	348263	297544	1.88888e+06	1.83219e+06	1.99853e+06	1.41792e+06	1.36784e+06	1.48591e+06	1.50261e+06	341404	1.90654e+06	1.42389e+06	70648.9	40864.4	84563.9	59259.6	1.05529	0.239768	1.33896	0.0776369	-2.06029	0.421116	0.213299	1.2909e-05	0.00126531
		479.834	1.229	1.21779e+07	7.24373e+06	1.21779e+07	1.21015e+07	6.16421e+06	9.63219e+06	9.19574e+06	6.9197e+06	1.11571e+07	1.15145e+07	8.92009e+06	1.14342e+07	1.13925e+07	26.9035	22.6739	25.9119	13.6043	8.28969e+06	1.29687e+07	1.34175e+07	7.29307e+06	1.12322e+07	1.04353e+07	1.20421e+07	1.92716e+07	1.89395e+07	9.43868e+06	1.14342e+07	1.19869e+07	1.15586e+07	9.65351e+06	1.67511e+07	1.09533e+07	2.83986e+06	2.08268e+06	4.08148e+06	1.34047e+06	1.05527	0.881336	1.52932	0.0776084	-0.182236	0.612892	0.755237	0.414792	0.0795902
		110.036	6.093	924472	2573.69	2131.62	2354.49	3815.84	2193.05	3308.4	705390	880524	924472	2118.69	2391.33	2649.68	9.39278	26.7295	13.8508	11.126	2945.31	2270.05	2610.53	4514.64	2557.34	3754.36	1.22756e+06	1.52093e+06	1.52061e+06	2241.86	2391.33	2787.93	2608.63	3608.78	1.42303e+06	2473.71	337.635	986.74	169283	282.203	1.05454	1.45885	575.264	0.0766182	0.544835	9.16808	0.623486	0.127916	0.000130299
		141.941	1.227	3.26601e+07	3.12835e+07	3.17765e+07	3.09782e+07	2.91157e+07	2.96843e+07	2.77767e+07	3.13295e+07	3.16603e+07	3.12267e+07	3.2105e+07	3.26601e+07	3.03935e+07	1.28514	3.39373	0.721416	3.72453	3.58007e+07	3.38402e+07	3.43469e+07	3.44477e+07	3.46152e+07	3.15209e+07	5.45215e+07	5.46869e+07	5.1363e+07	3.39715e+07	3.26601e+07	3.19794e+07	3.46626e+07	3.35279e+07	5.35238e+07	3.28703e+07	1.01765e+06	1.74018e+06	1.87316e+06	1.01253e+06	1.05453	1.02001	1.62833	0.0765942	0.0285782	0.703395	0.0966241	0.601794	7.35692e-05
	C14 H24 O6	288.154	13.208	2.64792e+06	1.55919e+06	1.79661e+06	1.79543e+06	1.72626e+06	1.94745e+06	1.86514e+06	2.54489e+06	2.64792e+06	2.33247e+06	1.68189e+06	1.77481e+06	1.75498e+06	7.96312	6.05513	6.41268	2.81682	1.78433e+06	1.91329e+06	1.99067e+06	2.04239e+06	2.27094e+06	2.11655e+06	4.42878e+06	4.57376e+06	3.83654e+06	1.77968e+06	1.77481e+06	1.84655e+06	1.8961e+06	2.14329e+06	4.27969e+06	1.80034e+06	104238	116598	390571	40088.9	1.05319	1.19049	2.37715	0.0747613	0.251556	1.24923	0.211709	0.0085375	0.000396861
		501.817	1.22	9.80728e+06	5.16583e+06	9.80728e+06	9.63484e+06	4.47648e+06	7.46172e+06	7.24504e+06	5.06306e+06	8.80305e+06	9.06547e+06	6.7432e+06	9.0283e+06	9.05766e+06	32.0796	26.0306	29.29	16.044	5.91175e+06	1.04442e+07	1.06826e+07	5.29627e+06	8.70118e+06	8.22164e+06	8.81106e+06	1.52055e+07	1.49113e+07	7.13523e+06	9.0283e+06	9.53028e+06	9.01284e+06	7.40636e+06	1.2976e+07	8.5646e+06	2.68827e+06	1.84306e+06	3.6099e+06	1.26306e+06	1.05234	0.864764	1.51507	0.0735962	-0.209621	0.599382	0.8067	0.420013	0.116404
	C6 H12 O5	164.068	13.891	410858	366449	235234	285321	178375	219643	218625	228800	320075	410858	313613	363821	233692	22.3954	11.4513	28.4546	21.6087	419362	250511	316349	211041	256128	248095	398172	552867	675797	331846	363821	245886	328741	238422	542279	313851	85104.7	24049.8	139115	60992.2	1.04744	0.759665	1.72782	0.0668704	-0.396565	0.788954	0.817564	0.117086	0.0597521
		97.9756	1.515	8.30425e+07	8.30425e+07	6.56848e+07	5.8945e+07	6.22172e+07	5.72566e+07	5.84665e+07	6.99522e+07	6.92907e+07	6.82565e+07	7.91877e+07	6.91343e+07	6.45605e+07	17.9598	4.36074	1.23566	10.5449	9.50335e+07	6.99506e+07	6.5355e+07	7.36112e+07	6.67675e+07	6.63475e+07	1.21735e+08	1.19686e+08	1.12271e+08	8.37915e+07	6.91343e+07	6.79292e+07	7.67797e+07	6.89087e+07	1.17897e+08	7.36183e+07	1.59743e+07	4.07785e+06	4.97919e+06	8.83082e+06	1.04294	0.936027	1.60147	0.0606602	-0.0953785	0.679395	0.779127	0.448867	0.00163654
		395.895	16.069	3.37835e+06	2.5471e+06	2.9271e+06	2.9865e+06	2.14604e+06	2.36363e+06	2.17152e+06	3.1494e+06	2.52834e+06	1.4501e+06	2.68241e+06	2.59375e+06	3.37835e+06	8.45317	5.34112	36.1893	14.8948	2.91489e+06	3.11719e+06	3.31127e+06	2.53905e+06	2.75625e+06	2.46424e+06	5.48079e+06	4.3672e+06	2.38519e+06	2.83836e+06	2.59375e+06	3.55463e+06	3.11445e+06	2.58651e+06	4.07773e+06	2.99558e+06	198207	151681	1.56797e+06	499361	1.03968	0.863443	1.36125	0.0561435	-0.211826	0.444931	0.721045	0.246128	0.318277
		261.899	1.23	3.53078e+07	3.07558e+07	3.14297e+07	3.37822e+07	2.97507e+07	2.88118e+07	2.70644e+07	2.92861e+07	3.25685e+07	3.17147e+07	3.19691e+07	3.53078e+07	3.13961e+07	4.96701	4.77631	5.4601	6.42271	3.51967e+07	3.34709e+07	3.74558e+07	3.5199e+07	3.35977e+07	3.07126e+07	5.09655e+07	5.62556e+07	5.21656e+07	3.38277e+07	3.53078e+07	3.30343e+07	3.53745e+07	3.31697e+07	5.31289e+07	3.40566e+07	1.99843e+06	2.27362e+06	2.77348e+06	1.15386e+06	1.0387	0.973959	1.56002	0.0547741	-0.0380672	0.641562	0.378579	0.579346	0.000388588
	C9 H8 O	132.058	14.408	861834	775693	588084	861834	725246	519948	542144	784383	770192	744922	766358	739367	788183	18.8677	18.9113	2.6077	3.19802	887699	626277	955554	858062	606317	615222	1.36503e+06	1.33035e+06	1.22528e+06	810912	739367	829309	823177	693200	1.30689e+06	793196	173863	142844	72772.8	47516.1	1.0378	0.873933	1.64762	0.0535241	-0.194406	0.720386	0.787579	0.314031	0.00051319
		239.917	1.263	5.68064e+06	5.16654e+06	5.52402e+06	5.25867e+06	4.70957e+06	5.03851e+06	4.45244e+06	4.61009e+06	5.43283e+06	5.41366e+06	5.29703e+06	5.41551e+06	5.68064e+06	3.49114	6.20616	9.11408	3.59452	5.91256e+06	5.88277e+06	5.83053e+06	5.57204e+06	5.87546e+06	5.05261e+06	8.02276e+06	9.38414e+06	8.9046e+06	5.60499e+06	5.41551e+06	5.97705e+06	5.87529e+06	5.50004e+06	8.7705e+06	5.66585e+06	41524.4	416124	690524	285672	1.03696	0.970735	1.54796	0.052367	-0.0428512	0.630367	0.277268	0.599786	0.00197631
		122.036	16.396	399281	278482	399281	398220	205103	264539	223371	87384.4	138754	89399.9	390879	326510	387247	19.3606	13.1792	27.6611	9.82061	318694	425212	441524	242664	308482	253480	152072	239670	147049	413604	326510	407453	395143	268209	179597	382522	66707.8	35294.3	52085.5	48605.6	1.03299	0.701158	0.469507	0.0468309	-0.512189	-1.09078	0.804216	0.0300399	0.00785269
		403.996	16.56	1.90418e+06	9533.52	7655.17	7367.46	9505.64	8223.82	8164.15	1.72907e+06	1.90418e+06	1.65215e+06	8956.82	7580.93	8914.25	14.3713	8.78057	7.33123	9.22176	10910.1	8152.32	8168.63	11246.4	9589.88	9264.64	3.00904e+06	3.28909e+06	2.71752e+06	9477.55	7580.93	9379.39	9077.02	10033.6	3.00522e+06	8812.62	1587.52	1062.81	285803	1067.81	1.03	1.13855	341.013	0.0426477	0.187203	8.41368	0.82259	0.233061	5.4082e-05
		271.178	12.932	1.37181e+06	1.21183e+06	1.35293e+06	1.14231e+06	783213	785976	754527	952316	1.01457e+06	924325	1.37181e+06	1.25412e+06	1.21477e+06	8.68486	2.24828	4.79303	6.38259	1.38682e+06	1.44079e+06	1.26653e+06	926644	916534	856233	1.65728e+06	1.75246e+06	1.52037e+06	1.45157e+06	1.25412e+06	1.27816e+06	1.36471e+06	899804	1.64337e+06	1.32795e+06	89210.3	38070.3	116672	107729	1.02769	0.67759	1.23753	0.0393995	-0.561516	0.30746	0.672529	0.00290608	0.026286
		301.188	3.889	1.79457e+06	1.00539e+06	1.65905e+06	1.79457e+06	779320	1.22266e+06	1.35587e+06	892171	1.30169e+06	1.44391e+06	1.17954e+06	1.74462e+06	1.70012e+06	28.3912	26.9687	23.6237	20.3831	1.15056e+06	1.76679e+06	1.98972e+06	922039	1.42576e+06	1.53863e+06	1.55261e+06	2.24841e+06	2.37501e+06	1.24812e+06	1.74462e+06	1.78883e+06	1.63569e+06	1.29548e+06	2.05868e+06	1.59386e+06	434669	328294	442811	300233	1.02625	0.812792	1.29163	0.0373758	-0.299041	0.369193	0.897537	0.309954	0.206813
		150.067	14.407	1.42196e+06	914552	1.42196e+06	1.39722e+06	604517	865592	1.13307e+06	854835	941451	957111	1.34926e+06	1.41332e+06	1.10877e+06	22.9859	30.4568	6.00212	12.4426	1.04661e+06	1.5143e+06	1.54916e+06	715223	1.00938e+06	1.2858e+06	1.48764e+06	1.62617e+06	1.57429e+06	1.4277e+06	1.41332e+06	1.16663e+06	1.37002e+06	1.00347e+06	1.5627e+06	1.33588e+06	280627	285333	69989.8	146756	1.02556	0.751162	1.16979	0.0364066	-0.412804	0.226248	0.860965	0.147189	0.0730598
		216.097	3.571	1.84504e+06	837851	874948	845703	1.75888e+06	1.77798e+06	1.84504e+06	907564	852102	885788	862648	954479	846569	2.2923	2.52237	3.16885	6.55685	958833	931770	937669	2.08098e+06	2.07332e+06	2.09374e+06	1.5794e+06	1.47184e+06	1.45698e+06	912800	954479	890742	942757	2.08268e+06	1.50274e+06	919341	14230.6	10317	66805.1	32368	1.02547	2.26541	1.63458	0.036287	1.17977	0.708924	0.315292	4.83911e-07	0.000168647
		244.128	12.935	3.0932e+06	2.74455e+06	2.58196e+06	2.5342e+06	2.47947e+06	2.30504e+06	2.68522e+06	3.06375e+06	3.02471e+06	3.0932e+06	2.66136e+06	2.82129e+06	2.71164e+06	4.20859	7.64297	1.12255	2.99411	3.14085e+06	2.74964e+06	2.80978e+06	2.93353e+06	2.68793e+06	3.04717e+06	5.33174e+06	5.22459e+06	5.08782e+06	2.81608e+06	2.82129e+06	2.85313e+06	2.90009e+06	2.88955e+06	5.21471e+06	2.83017e+06	210660	183615	122260	20057.7	1.0247	1.02098	1.84255	0.0352086	0.0299552	0.8817	0.597754	0.607343	4.8294e-06
		293.931	1.313	2.5917e+07	1.24335e+07	2.5917e+07	2.15204e+07	1.22419e+07	2.49123e+07	2.36394e+07	1.32753e+07	2.49813e+07	2.58345e+07	1.28064e+07	2.50352e+07	2.42911e+07	34.4561	34.429	32.849	33.1012	1.42288e+07	2.76002e+07	2.38607e+07	1.44838e+07	2.90505e+07	2.68259e+07	2.31025e+07	4.31503e+07	4.24936e+07	1.3551e+07	2.50352e+07	2.55586e+07	2.18966e+07	2.34534e+07	3.62488e+07	2.13816e+07	6.89867e+06	7.84712e+06	1.13898e+07	6.78654e+06	1.02408	1.0969	1.69533	0.0343353	0.133429	0.761565	0.930994	0.746851	0.124059
		357.867	1.017	1.44143e+06	20641.4	1.28751e+06	1.44143e+06	800300	779724	952852	1.1664e+06	1.28846e+06	1.33968e+06	802847	909691	1.10598e+06	85.0676	11.2019	7.03772	16.3651	23621.9	1.37113e+06	1.59818e+06	946860	909245	1.08129e+06	2.02985e+06	2.22556e+06	2.20355e+06	849523	909691	1.16369e+06	997642	979132	2.15299e+06	974301	851132	90450.3	107205	166752	1.02396	1.00496	2.20978	0.0341544	0.00713569	1.1439	0.965057	0.966933	0.000501495
	C8 H6 O2	134.037	13.204	3.81566e+06	435825	493064	465617	3.17925e+06	3.6387e+06	3.81566e+06	194827	187813	210462	476088	500638	480426	6.15864	9.26744	5.86477	2.69759	498755	525085	516250	3.76147e+06	4.24312e+06	4.32999e+06	339050	324410	346176	503767	500638	505494	513363	4.11153e+06	336545	503300	13400	306254	11097.2	2461.14	1.02	8.16914	0.668677	0.0285632	3.03018	-0.580618	0.269919	3.40563e-05	1.42459e-05
		289.261	16.615	2.34111e+06	7748.61	13519.9	12790.9	5622.77	8797.08	10946.2	2.2546e+06	2.34111e+06	2.30999e+06	11486.4	11894.2	12048.9	27.6823	31.6735	1.90377	2.46071	8867.47	14397.9	14181.8	6652.48	10258.4	12421.7	3.92359e+06	4.04381e+06	3.79957e+06	12154.2	11894.2	12677.6	12482.4	9777.51	3.92233e+06	12242	3132.48	2914.5	122124	399.005	1.01964	0.798684	320.399	0.028054	-0.324302	8.32372	0.901469	0.220379	6.33049e-07
		470.299	15.535	2.03593e+06	1.74518e+06	2.02758e+06	1.87019e+06	1.33512e+06	1.30633e+06	1.47226e+06	1.44285e+06	1.46504e+06	1.14175e+06	1.98279e+06	1.87756e+06	2.03593e+06	7.52315	6.46612	13.3778	4.10083	1.99718e+06	2.15926e+06	2.07357e+06	1.57962e+06	1.52333e+06	1.67072e+06	2.51094e+06	2.53056e+06	1.878e+06	2.09806e+06	1.87756e+06	2.14216e+06	2.07667e+06	1.59122e+06	2.3065e+06	2.03926e+06	81086.3	74376.2	371220	141762	1.01834	0.780294	1.13105	0.0262257	-0.35791	0.17766	0.711809	0.00835472	0.308811
		415.22	13.53	4.62868e+06	3.00373e+06	3.26449e+06	3.46454e+06	2.30684e+06	2.57184e+06	2.7008e+06	4.02341e+06	4.32984e+06	4.62868e+06	3.19212e+06	3.45113e+06	3.56182e+06	7.12243	7.95001	6.99376	5.57798	3.43746e+06	3.4765e+06	3.84129e+06	2.72929e+06	2.99905e+06	3.06485e+06	7.0018e+06	7.47895e+06	7.61344e+06	3.3777e+06	3.45113e+06	3.74767e+06	3.58508e+06	2.93107e+06	7.36473e+06	3.5255e+06	222742	177810	321421	195876	1.0169	0.83139	2.08899	0.0241787	-0.266403	1.0628	0.745433	0.0176617	6.0301e-05
	C15 H22 O7	314.136	14.103	3.03755e+07	1.41005e+07	2.27282e+07	2.40151e+07	1.21043e+07	1.79227e+07	1.93668e+07	2.52548e+07	3.03642e+07	3.03755e+07	1.58762e+07	2.32031e+07	2.46062e+07	26.5825	23.3502	10.3024	22.0835	1.61365e+07	2.42043e+07	2.66267e+07	1.4321e+07	2.08998e+07	2.19773e+07	4.395e+07	5.24482e+07	4.99628e+07	1.67993e+07	2.32031e+07	2.58901e+07	2.23225e+07	1.90661e+07	4.8787e+07	2.19642e+07	5.49243e+06	4.1445e+06	4.36939e+06	4.67035e+06	1.01631	0.868053	2.22121	0.023346	-0.204145	1.15135	0.935537	0.466512	0.00190742
		584.366	12.699	3.21589e+06	2.69732e+06	2.90371e+06	2.88741e+06	2.15823e+06	2.08777e+06	2.26676e+06	2.39516e+06	2.25648e+06	2.38495e+06	3.21589e+06	2.53239e+06	3.15196e+06	4.05529	4.1532	3.29521	12.7251	3.0868e+06	3.09229e+06	3.2014e+06	2.55347e+06	2.43458e+06	2.5723e+06	4.16822e+06	3.89762e+06	3.92287e+06	3.40286e+06	2.53239e+06	3.31642e+06	3.12683e+06	2.52012e+06	3.99624e+06	3.08389e+06	64637.5	74677.4	149473	479566	1.01392	0.817188	1.29584	0.0199505	-0.29126	0.373891	0.885285	0.114547	0.0346514
		334.036	13.707	439760	385296	406905	433091	335510	335721	329739	16256.7	15247.5	19892.8	422601	439760	428292	5.86	1.01739	14.2612	2.03149	440931	433331	480188	396953	391488	374186	28291	26337.1	32720.5	447171	439760	450640	451483	387542	29116.2	445857	25147.7	11885.1	3270.71	5557.56	1.01262	0.869208	0.0653039	0.0180916	-0.202226	-3.93669	0.724371	0.00153192	3.82003e-08
		195.953	1.303	3.36451e+08	1.50583e+08	2.90462e+08	3.01501e+08	1.47258e+08	2.22181e+08	2.84737e+08	1.60194e+08	2.65666e+08	3.29679e+08	1.49592e+08	3.36451e+08	2.96352e+08	33.9885	31.5657	33.9825	37.7195	1.72327e+08	3.09326e+08	3.34288e+08	1.74226e+08	2.59088e+08	3.23118e+08	2.78779e+08	4.58886e+08	5.4227e+08	1.58289e+08	3.36451e+08	3.11815e+08	2.7198e+08	2.52144e+08	4.26645e+08	2.68852e+08	8.72e+07	7.46884e+07	1.34671e+08	9.65387e+07	1.01164	0.937855	1.58692	0.0166909	-0.0925626	0.666226	0.968771	0.824235	0.174408
		245.235	15.394	653283	128036	145287	177970	122817	134287	119362	653283	650001	625700	171159	150767	154185	16.8593	6.22589	2.34331	6.88135	146523	154722	197323	145308	156593	135452	1.13689e+06	1.12275e+06	1.02918e+06	181109	150767	162230	166190	145784	1.09627e+06	164702	27272.5	10578.7	58533	15321.5	1.00903	0.885138	6.65607	0.012969	-0.176026	2.73467	0.938325	0.153236	1.17532e-05
		295.031	14.014	793001	793001	364859	246059	484679	538806	414334	182924	308564	192986	643363	556117	312876	61.4741	13.0223	30.5994	33.9741	907506	388554	272816	573439	628307	470184	318336	532983	317431	680767	556117	329202	522959	557310	389584	522029	338018	80286.1	124189	178244	1.00178	1.06759	0.746288	0.0025684	0.0943511	-0.422196	0.996838	0.770209	0.350537
		587.131	14.123	2.05189e+06	1.68821e+06	1.35914e+06	1.65588e+06	2.05189e+06	1.92074e+06	1.56083e+06	736267	837452	765459	1.49926e+06	1.64285e+06	1.89091e+06	11.5693	13.7846	6.67919	11.8099	1.93198e+06	1.44741e+06	1.83595e+06	2.42765e+06	2.23979e+06	1.77122e+06	1.2813e+06	1.44653e+06	1.25906e+06	1.58643e+06	1.64285e+06	1.98957e+06	1.73845e+06	2.14622e+06	1.32896e+06	1.73962e+06	256578	338072	102424	218300	0.999329	1.23373	0.763941	-0.000968075	0.30303	-0.388467	0.9955	0.15501	0.0419825
		234.014	13.194	2.25689e+06	25824.3	29407	34205.4	483810	681978	658230	1.73421e+06	1.82262e+06	2.25689e+06	30126.4	33044.1	32486.9	14.1058	17.7975	14.4364	4.85789	29553.2	31316.8	37925.1	572411	795261	746957	3.01798e+06	3.14821e+06	3.71223e+06	31877.9	33044.1	34182	32931.7	704877	3.29281e+06	33034.7	4413.42	117233	369019	1152.12	0.996882	21.3375	99.6773	-0.00450514	4.41532	6.63919	0.970676	0.000578486	0.000106438
		228.184	15.868	764202	550295	517043	595101	713535	764202	717998	577958	567539	586439	604758	636783	543951	7.06878	3.83286	1.63973	7.92283	629754	550621	659815	844206	891144	814781	1.0058e+06	980312	964598	639917	636783	572334	613397	850043	983570	616345	56404.8	38514.6	20793.2	38146.7	0.995217	1.37917	1.59581	-0.00691647	0.463799	0.67429	0.94383	0.00171921	0.000126642
		981.576	13.322	974404	844937	905433	950657	713623	758941	698469	756365	709854	803223	968840	974404	951119	5.8915	4.34795	6.17125	1.26039	966941	964235	1.05404e+06	844309	885009	792619	1.31628e+06	1.22613e+06	1.32117e+06	1.02517e+06	974404	1.00075e+06	995071	840646	1.28786e+06	1.00011e+06	51083.4	46303.7	53513.7	25387.3	0.994965	0.840557	1.28772	-0.00728207	-0.250583	0.364823	0.885887	0.00638251	0.00109188
		97.9663	1.471	5.71744e+06	4.42415e+06	4.94683e+06	5.04925e+06	5.2881e+06	5.65428e+06	5.71744e+06	5.1264e+06	4.84838e+06	4.96919e+06	5.30055e+06	5.19207e+06	4.97022e+06	6.97502	4.17429	2.7986	3.26676	5.06297e+06	5.26809e+06	5.59833e+06	6.25652e+06	6.59352e+06	6.48813e+06	8.92129e+06	8.37462e+06	8.17352e+06	5.60871e+06	5.19207e+06	5.22956e+06	5.3098e+06	6.44605e+06	8.48981e+06	5.34344e+06	270106	172394	386965	230491	0.993703	1.20635	1.58883	-0.00911291	0.270646	0.667962	0.877595	0.00267736	0.000267655
	C10 H12 O4	196.073	13.201	589762	67320	72351.4	59105.3	465960	513423	589762	21991.9	28953.6	27877.9	78020.7	65523.8	69591.4	10.0914	11.9415	14.2633	8.97182	77040.7	77050.1	65532.8	551292	598708	669259	38271.8	50011.6	45854.7	82556.6	65523.8	73222.6	73207.9	606420	44712.7	73767.7	6646.82	59360.6	5952.68	8529.51	0.992411	8.22067	0.606129	-0.0109903	3.03926	-0.722303	0.932861	0.00010417	0.00841039
	C17 H28 O5	312.194	17.517	5.70513e+06	4.65576e+06	5.00863e+06	5.30537e+06	4.5032e+06	5.12999e+06	5.25153e+06	4.71755e+06	4.9455e+06	5.26058e+06	5.70513e+06	5.02508e+06	5.34426e+06	6.51732	8.09397	5.4814	6.34982	5.32802e+06	5.33391e+06	5.8823e+06	5.32787e+06	5.98213e+06	5.95941e+06	8.20979e+06	8.54237e+06	8.65281e+06	6.03681e+06	5.02508e+06	5.62312e+06	5.51474e+06	5.75647e+06	8.46832e+06	5.56167e+06	318325	371350	230607	508654	0.991563	1.03503	1.52262	-0.0122244	0.0496666	0.606558	0.898796	0.620535	0.000838641
	C7 H6 O3	138.032	14.125	1.25114e+06	1.02059e+06	846194	1.11573e+06	1.20279e+06	1.01016e+06	1.01266e+06	50300.6	53302.8	56803.6	1.25114e+06	1.07968e+06	900945	13.7499	10.277	6.08698	16.2553	1.16796e+06	901148	1.23706e+06	1.42306e+06	1.17796e+06	1.14917e+06	87536.4	92070.1	93432.8	1.32388e+06	1.07968e+06	947955	1.10206e+06	1.25006e+06	91013.1	1.11717e+06	177390	150510	3087.05	190746	0.986471	1.11895	0.0814674	-0.0196509	0.162146	-3.61763	0.924785	0.39713	0.000738682
		359.876	1.271	2.89662e+06	2.34625e+06	2.53658e+06	2.63421e+06	2.02772e+06	2.48513e+06	2.43261e+06	2.29221e+06	2.89662e+06	2.56815e+06	2.7692e+06	2.65138e+06	2.69977e+06	5.8445	10.8117	11.7025	2.18793	2.68504e+06	2.70131e+06	2.92067e+06	2.39906e+06	2.89794e+06	2.76051e+06	3.98905e+06	5.00335e+06	4.2242e+06	2.9302e+06	2.65138e+06	2.84064e+06	2.76901e+06	2.68584e+06	4.40553e+06	2.80741e+06	131593	257687	530904	142349	0.986322	0.956697	1.56925	-0.0198694	-0.0638668	0.650079	0.748803	0.513977	0.0073029
	C10 H10 O5	210.052	14.122	2.80901e+09	2.41746e+09	2.42272e+09	2.44887e+09	2.4673e+09	2.35919e+09	2.2927e+09	2.6905e+08	2.29919e+08	1.78516e+08	2.62678e+09	2.80901e+09	2.47066e+09	0.692457	3.71352	20.1062	6.42552	2.76653e+09	2.58007e+09	2.71518e+09	2.91915e+09	2.75107e+09	2.60175e+09	4.68218e+08	3.9714e+08	2.9363e+08	2.7795e+09	2.80901e+09	2.59957e+09	2.68726e+09	2.75732e+09	3.86329e+08	2.72936e+09	9.63155e+07	1.58791e+08	8.77947e+07	1.13363e+08	0.984574	1.01024	0.141546	-0.0224289	0.0147048	-2.82066	0.649635	0.81618	9.27256e-06
		169.147	14.941	641582	577305	591615	566079	391636	428227	390966	477934	495541	531233	641582	637094	603948	2.21314	5.28271	5.41421	3.27551	660665	630037	627637	463357	499359	443667	831731	855950	873794	678882	637094	635461	639446	468794	853825	650479	18415	28241.7	21111.6	24611.2	0.983039	0.720691	1.31261	-0.0246792	-0.472547	0.392438	0.567832	0.00109897	0.000407717
		106.046	2.823	2.71419e+06	2.12632e+06	2.12884e+06	2.55622e+06	2.04053e+06	1.73809e+06	1.97979e+06	2.05124e+06	2.71419e+06	2.54194e+06	2.18572e+06	2.62665e+06	2.6061e+06	10.9	8.33486	14.1223	10.0636	2.43335e+06	2.26709e+06	2.8342e+06	2.41421e+06	2.02681e+06	2.24665e+06	3.56969e+06	4.68823e+06	4.18109e+06	2.31279e+06	2.62665e+06	2.74209e+06	2.51154e+06	2.22922e+06	4.14634e+06	2.56051e+06	291526	194289	560077	222160	0.980877	0.870617	1.61934	-0.0278561	-0.199889	0.695407	0.828368	0.123776	0.0103492
		475.241	13.352	903668	595646	677446	624979	501315	571068	571990	834369	834379	903668	713400	664963	682358	6.55007	7.39623	4.66569	3.57206	681654	721441	692942	593122	665928	649091	1.45202e+06	1.44122e+06	1.48639e+06	754876	664963	717962	698679	636047	1.45988e+06	712600	20504.8	38115.6	23585.4	45195.3	0.980464	0.892572	2.04866	-0.0284632	-0.16396	1.03468	0.652489	0.0883547	1.42914e-05
	C12 H12 O5	236.068	14.103	7.60855e+07	6.31664e+07	6.9782e+07	7.27597e+07	5.65201e+07	6.39886e+07	7.30703e+07	2.81722e+06	4.74873e+06	4.61689e+06	7.60855e+07	7.46788e+07	7.40324e+07	7.16104	12.8447	26.5729	1.40093	7.22873e+07	7.43139e+07	8.0672e+07	6.68707e+07	7.46177e+07	8.29198e+07	4.90271e+06	8.2025e+06	7.59404e+06	8.0509e+07	7.46788e+07	7.78954e+07	7.57577e+07	7.48027e+07	6.89975e+06	7.76944e+07	4.37484e+06	8.02615e+06	1.75604e+06	2.92029e+06	0.975073	0.962782	0.0888063	-0.0364176	-0.054719	-3.49319	0.558329	0.589098	3.56018e-06
		335.926	14.024	2.33978e+06	1.68136e+06	1.42762e+06	687013	932065	1.33752e+06	1.13731e+06	2.29144e+06	2.1314e+06	2.33978e+06	1.16656e+06	1.43099e+06	1.56883e+06	40.8318	17.8519	4.83827	14.7195	1.92414e+06	1.52034e+06	761722	1.10276e+06	1.55969e+06	1.29062e+06	3.98771e+06	3.68157e+06	3.84856e+06	1.23438e+06	1.43099e+06	1.65068e+06	1.40207e+06	1.31769e+06	3.83928e+06	1.43868e+06	590165	229669	153279	208257	0.974547	0.915899	2.6686	-0.0371959	-0.12674	1.41608	0.924154	0.53613	8.7483e-05
		767.528	12.582	3.36149e+06	3.36149e+06	2.43147e+06	2.62801e+06	2.54153e+06	2.33862e+06	1.75105e+06	1.87634e+06	1.69014e+06	1.58625e+06	3.2035e+06	3.24152e+06	2.83039e+06	17.4622	18.5731	8.55744	7.34806	3.84687e+06	2.58938e+06	2.91379e+06	3.00696e+06	2.72709e+06	1.98709e+06	3.26533e+06	2.91937e+06	2.60913e+06	3.38974e+06	3.24152e+06	2.97808e+06	3.11668e+06	2.57371e+06	2.93128e+06	3.20311e+06	652836	526953	328264	208503	0.973015	0.803503	0.915133	-0.0394654	-0.315624	-0.127946	0.837771	0.126734	0.292639
	C12 H12 O5	236.068	14.295	1.30298e+08	1.18148e+08	1.1223e+08	1.03222e+08	1.07318e+08	1.24903e+08	1.0899e+08	1.00936e+07	1.13218e+07	1.06801e+07	1.11375e+08	1.24771e+08	1.30298e+08	6.75926	8.53401	5.74192	7.96623	1.35208e+08	1.19519e+08	1.14447e+08	1.26972e+08	1.45651e+08	1.23681e+08	1.75655e+07	1.95561e+07	1.7567e+07	1.1785e+08	1.24771e+08	1.37097e+08	1.23058e+08	1.32101e+08	1.82296e+07	1.26573e+08	1.08238e+07	1.18493e+07	1.14884e+06	9.74927e+06	0.972231	1.04368	0.144024	-0.0406288	0.0616748	-2.79562	0.697471	0.56644	4.4125e-05
		301.188	6.217	6.56911e+06	4.53333e+06	5.55554e+06	6.06978e+06	3.1254e+06	4.44129e+06	4.50414e+06	3.73463e+06	4.77322e+06	5.12378e+06	4.94037e+06	6.56911e+06	6.28137e+06	14.5203	19.3485	15.8986	14.6583	5.18792e+06	5.91633e+06	6.72984e+06	3.69776e+06	5.17903e+06	5.11128e+06	6.49925e+06	8.2448e+06	8.42781e+06	5.22759e+06	6.56911e+06	6.60912e+06	5.9447e+06	4.66269e+06	7.72395e+06	6.13528e+06	771348	836340	1.06457e+06	786330	0.968937	0.759981	1.25894	-0.0455246	-0.395966	0.332211	0.779352	0.0904233	0.10613
		767.528	12.432	2.40626e+06	2.19085e+06	2.13695e+06	2.03488e+06	1.68005e+06	1.58785e+06	1.57727e+06	1.20548e+06	1.06946e+06	1.19581e+06	2.40626e+06	2.34534e+06	2.26176e+06	3.73486	3.50053	6.56024	3.10307	2.50719e+06	2.27573e+06	2.25616e+06	1.98773e+06	1.8516e+06	1.78988e+06	2.09786e+06	1.84728e+06	1.96692e+06	2.54615e+06	2.34534e+06	2.37978e+06	2.34636e+06	1.8764e+06	1.97069e+06	2.42376e+06	139628	101225	125333	107389	0.968068	0.774172	0.813071	-0.0468194	-0.369274	-0.298547	0.489041	0.00301873	0.00894033
		881.56	13.023	2.44421e+06	1.33528e+06	1.36195e+06	1.12551e+06	1.00354e+06	1.13179e+06	1.07024e+06	1.86784e+06	1.35878e+06	2.44421e+06	1.44935e+06	1.48984e+06	1.27692e+06	10.1629	6.00276	28.729	8.0456	1.52808e+06	1.4504e+06	1.2479e+06	1.18732e+06	1.31979e+06	1.2145e+06	3.25054e+06	2.34703e+06	4.02033e+06	1.53361e+06	1.48984e+06	1.34354e+06	1.40879e+06	1.24053e+06	3.20597e+06	1.45566e+06	144653	69966.6	837539	99536.5	0.967802	0.852212	2.20241	-0.0472164	-0.230716	1.13908	0.667873	0.0375632	0.0228725
		325.86	1.02	4.59514e+06	3.02776e+06	2.52879e+06	2.88023e+06	1.87554e+06	1.5775e+06	1.72167e+06	4.59514e+06	2.47696e+06	3.92392e+06	2.26964e+06	3.40872e+06	3.70697e+06	9.115	8.64088	29.5336	24.2469	3.46496e+06	2.69302e+06	3.19345e+06	2.21901e+06	1.83954e+06	1.95374e+06	7.99675e+06	4.27846e+06	6.45422e+06	2.40159e+06	3.40872e+06	3.9004e+06	3.11714e+06	2.0041e+06	6.24314e+06	3.2369e+06	391586	194684	1.86811e+06	764034	0.963	0.61914	1.92874	-0.0543919	-0.691662	0.947657	0.820957	0.0536365	0.0613369
		103.019	14.122	6.78646e+06	5.87114e+06	5.21069e+06	5.87089e+06	5.77931e+06	5.78626e+06	5.17194e+06	325723	330117	241990	6.78646e+06	6.65274e+06	5.40845e+06	6.74653	6.3215	16.5934	12.0961	6.71891e+06	5.54909e+06	6.50932e+06	6.83769e+06	6.74742e+06	5.8691e+06	566845	570211	398035	7.18101e+06	6.65274e+06	5.69065e+06	6.2591e+06	6.48473e+06	511697	6.50814e+06	623758	535064	98448.3	755629	0.961735	0.996404	0.0786242	-0.0562884	-0.00519744	-3.66888	0.68252	0.967177	0.000167789
		101.992	1.402	1.92409e+07	1.7575e+07	9.81968e+06	3.40713e+06	1.63132e+07	3.70331e+06	5.64818e+06	1.57586e+07	4.78337e+06	3.64303e+06	1.92409e+07	7.08153e+06	7.89068e+06	69.0987	79.3569	82.9862	59.6148	2.01128e+07	1.04574e+07	3.77763e+06	1.93007e+07	4.31847e+06	6.40953e+06	2.74241e+07	8.26234e+06	5.99221e+06	2.03596e+07	7.08153e+06	8.30241e+06	1.14493e+07	1.00096e+07	1.38929e+07	1.19145e+07	8.21262e+06	8.114e+06	1.17732e+07	7.33906e+06	0.960953	0.840116	1.16605	-0.0574619	-0.251339	0.221626	0.945191	0.778004	0.817072
		554.878	16.047	1.12105e+07	3.62561e+06	9.57674e+06	9.78417e+06	2.0821e+06	4.48405e+06	5.00796e+06	7.28152e+06	9.20559e+06	9.65645e+06	6.3288e+06	7.80705e+06	1.12105e+07	45.6438	40.4391	14.4738	29.6293	4.14913e+06	1.01987e+07	1.08482e+07	2.4634e+06	5.22889e+06	5.68301e+06	1.26718e+07	1.59008e+07	1.58833e+07	6.69674e+06	7.80705e+06	1.17954e+07	8.39866e+06	4.45843e+06	1.48186e+07	8.76641e+06	3.6945e+06	1.74261e+06	1.85926e+06	2.68132e+06	0.958049	0.508581	1.69039	-0.061828	-0.97545	0.757355	0.895771	0.0799589	0.0325039
		115.064	1.464	4.65839e+06	1.44044e+06	1.76678e+06	2.4111e+06	4.65839e+06	4.09887e+06	4.17861e+06	1.59277e+06	1.833e+06	2.55341e+06	1.58469e+06	2.13605e+06	2.55913e+06	26.3745	7.01904	25.0833	23.3424	1.64844e+06	1.88152e+06	2.6733e+06	5.51149e+06	4.77974e+06	4.74186e+06	2.77183e+06	3.16615e+06	4.19996e+06	1.67682e+06	2.13605e+06	2.69266e+06	2.06775e+06	5.01103e+06	3.37931e+06	2.16851e+06	537213	433824	737539	508697	0.953536	2.31082	1.55836	-0.0686413	1.2084	0.640027	0.825107	0.00181165	0.0793166
		156.163	1.072	1.0583e+06	684796	611893	703445	713003	685825	763238	1.0583e+06	985689	1.05484e+06	816963	727115	702724	7.25666	5.44961	3.9653	8.03321	783677	651631	779941	843576	799748	866119	1.84172e+06	1.70258e+06	1.73504e+06	864459	727115	739392	738416	836481	1.75978e+06	776989	75181.1	33749.9	72794.2	75999.8	0.950357	1.07657	2.26488	-0.0734592	0.106439	1.17943	0.565883	0.283029	8.54593e-05
		577.812	1.205	5.86794e+06	3.24532e+06	4.875e+06	5.02304e+06	3.14827e+06	4.41623e+06	4.8319e+06	5.86794e+06	5.47286e+06	5.35061e+06	5.24516e+06	4.96967e+06	4.47794e+06	22.5151	21.2247	4.85974	7.9356	3.71393e+06	5.1916e+06	5.56927e+06	3.72481e+06	5.14981e+06	5.48321e+06	1.02118e+07	9.45328e+06	8.80091e+06	5.5501e+06	4.96967e+06	4.7116e+06	4.82493e+06	4.78595e+06	9.48865e+06	5.07712e+06	980515	933966	706089	429455	0.950329	0.94265	1.8689	-0.0735013	-0.0852065	0.902192	0.70413	0.649401	0.000760769
		753.477	14.957	1.01203e+06	801229	855705	869139	542123	693961	616281	522392	517137	556524	1.01203e+06	892290	930826	4.27096	12.2965	4.01963	6.46774	916922	911277	963653	641403	809234	699352	909100	893252	915393	1.07087e+06	892290	979395	930617	716663	905915	980850	28748.6	85244.1	11409	89296.9	0.948786	0.730655	0.923601	-0.0758448	-0.452738	-0.114658	0.406181	0.020716	0.22282
		286.134	16.534	1.73809e+06	1.39284e+06	1.63942e+06	1.35294e+06	1.34522e+06	1.46801e+06	1.51869e+06	1.56569e+06	1.70759e+06	1.50647e+06	1.73809e+06	1.50947e+06	1.66579e+06	10.6154	6.17712	6.48697	7.13501	1.59396e+06	1.74589e+06	1.50006e+06	1.59157e+06	1.71186e+06	1.7234e+06	2.72472e+06	2.94952e+06	2.4779e+06	1.83914e+06	1.50947e+06	1.75271e+06	1.61331e+06	1.67561e+06	2.71738e+06	1.70044e+06	124048	73006.2	235898	170938	0.948759	0.985399	1.59805	-0.075887	-0.0212203	0.676311	0.514369	0.828389	0.0037747
	C24 H28 O7	428.183	16.663	1.16497e+06	896173	1.11599e+06	1.01997e+06	609600	963760	948152	1.00891e+06	1.05775e+06	985701	1.0745e+06	1.16497e+06	1.16465e+06	10.9031	23.8097	3.61458	4.59503	1.02558e+06	1.18846e+06	1.13088e+06	721237	1.12385e+06	1.07596e+06	1.75577e+06	1.82706e+06	1.62132e+06	1.13697e+06	1.16497e+06	1.22542e+06	1.11497e+06	973682	1.73472e+06	1.17579e+06	82600.9	219931	104471	45205.8	0.948276	0.828108	1.47536	-0.076621	-0.272109	0.561069	0.325918	0.193981	0.00104845
		534.257	15.744	1.56505e+06	883358	1.47442e+06	1.38564e+06	968735	1.48622e+06	1.4628e+06	986267	1.3504e+06	1.54422e+06	1.2177e+06	1.4076e+06	1.56505e+06	25.5431	22.3785	21.8976	12.452	1.01091e+06	1.57018e+06	1.53632e+06	1.14614e+06	1.7331e+06	1.65998e+06	1.71636e+06	2.33255e+06	2.53999e+06	1.28849e+06	1.4076e+06	1.64671e+06	1.37247e+06	1.51307e+06	2.1963e+06	1.4476e+06	313577	319869	428384	182429	0.948102	1.04523	1.5172	-0.0768866	0.0638201	0.601415	0.737958	0.773475	0.049557
		255.082	14.122	7.3686e+07	6.061e+07	5.02213e+07	6.26195e+07	5.55306e+07	4.90575e+07	5.47771e+07	3.2959e+06	3.22381e+06	3.41109e+06	7.3686e+07	5.83905e+07	6.34231e+07	11.5092	6.66371	2.8537	11.9622	6.93617e+07	5.34829e+07	6.9429e+07	6.57e+07	5.72064e+07	6.21609e+07	5.73573e+06	5.56849e+06	5.6107e+06	7.79699e+07	5.83905e+07	6.67324e+07	6.40912e+07	6.16891e+07	5.63831e+06	6.76976e+07	9.18714e+06	4.26643e+06	86970.8	9.82533e+06	0.946728	0.911245	0.0832867	-0.0789783	-0.13409	-3.58577	0.66653	0.386283	0.000396574
		97.9766	1.509	9.59809e+07	7.07366e+07	9.18309e+07	8.41959e+07	7.00133e+07	7.94157e+07	8.30013e+07	7.76929e+07	9.21314e+07	9.38573e+07	9.59809e+07	9.24794e+07	8.91833e+07	12.9845	8.65756	10.099	3.67305	8.09506e+07	9.77947e+07	9.33518e+07	8.28349e+07	9.26074e+07	9.41895e+07	1.35206e+08	1.59139e+08	1.5438e+08	1.01561e+08	9.24794e+07	9.38368e+07	9.0699e+07	8.98773e+07	1.49575e+08	9.59591e+07	8.72978e+06	6.14995e+06	1.26693e+07	4.89868e+06	0.945184	0.936621	1.55874	-0.0813323	-0.0944625	0.640379	0.414237	0.25137	0.00239456
	C9 H10 O4	182.057	13.43	395167	274935	350789	342492	245255	295898	284236	151339	155808	166719	345413	351300	395167	12.8918	9.63947	5.00856	7.46952	314634	373570	379737	290169	345049	322550	263370	269127	274225	365494	351300	415786	355980	319256	268908	377527	35939.5	27588	5430.85	33885.3	0.942927	0.845651	0.712288	-0.0847815	-0.241865	-0.489468	0.491979	0.0820511	0.00539114
		201.173	1.367	4.53534e+06	2.71841e+06	3.53663e+06	1.94022e+06	3.2281e+06	3.12536e+06	1.86133e+06	4.18659e+06	1.53128e+06	1.39735e+06	4.53534e+06	1.91529e+06	2.72121e+06	29.2226	27.7979	66.3282	43.8941	3.11093e+06	3.76631e+06	2.15121e+06	3.81926e+06	3.64452e+06	2.11223e+06	7.28577e+06	2.64498e+06	2.29842e+06	4.79902e+06	1.91529e+06	2.8632e+06	3.00948e+06	3.192e+06	4.07639e+06	3.1925e+06	812316	939184	2.7848e+06	1.4698e+06	0.942672	0.999843	1.27686	-0.0851729	-0.000226485	0.352604	0.859466	0.999627	0.65227
	C14 H18 O7	298.105	14.289	1.82608e+08	1.52065e+08	1.5951e+08	1.41981e+08	1.63539e+08	1.49352e+08	1.43729e+08	1.06529e+07	1.22924e+07	1.14113e+07	1.82608e+08	1.6744e+08	1.62816e+08	5.81903	6.70744	7.16444	6.05636	1.74022e+08	1.69869e+08	1.57421e+08	1.93489e+08	1.7416e+08	1.63103e+08	1.85389e+07	2.12327e+07	1.87697e+07	1.93224e+08	1.6744e+08	1.71311e+08	1.67104e+08	1.76917e+08	1.95138e+07	1.77325e+08	8.63913e+06	1.53793e+07	1.49307e+06	1.39045e+07	0.942361	0.997701	0.110045	-0.0856484	-0.00332129	-3.18383	0.34034	0.974458	4.04008e-05
		380.108	14.027	666044	116378	95265.4	85453.8	48255.1	157339	91587.1	452674	598114	666044	162809	98329	75817.1	15.9567	55.4455	19.0478	40.1997	133182	101452	94746.5	57092.1	183474	103933	787771	1.03312e+06	1.09554e+06	172274	98329	79773.2	109794	114833	972144	116792	20530.5	63892.4	162692	48936.5	0.940077	0.983226	8.32371	-0.0891495	-0.0244046	3.05723	0.830523	0.968391	0.000952535
		301.188	6.181	6.82621e+06	4.53333e+06	5.55554e+06	6.06978e+06	3.1254e+06	4.44129e+06	4.50414e+06	3.73463e+06	4.77322e+06	5.12378e+06	4.94037e+06	6.56911e+06	6.82621e+06	14.5203	19.3485	15.8986	16.7326	5.18792e+06	5.91633e+06	6.72984e+06	3.69776e+06	5.17903e+06	5.11128e+06	6.49925e+06	8.2448e+06	8.42781e+06	5.22759e+06	6.56911e+06	7.18239e+06	5.9447e+06	4.66269e+06	7.72395e+06	6.32636e+06	771348	836340	1.06457e+06	999751	0.93967	0.737025	1.22091	-0.0897733	-0.440214	0.287963	0.628275	0.0915511	0.17275
		413.89	1.272	2.21132e+07	1.33207e+07	2.05558e+07	2.05853e+07	2.0135e+07	1.99456e+07	2.00395e+07	1.41709e+07	2.14637e+07	2.21132e+07	2.10556e+07	2.07043e+07	1.99351e+07	23.0569	0.472489	22.9097	2.7869	1.52441e+07	2.18908e+07	2.28238e+07	2.38223e+07	2.32588e+07	2.27408e+07	2.46612e+07	3.70743e+07	3.63727e+07	2.22797e+07	2.07043e+07	2.09752e+07	1.99862e+07	2.3274e+07	3.27027e+07	2.13198e+07	4.13321e+06	540935	6.97303e+06	842344	0.937451	1.09166	1.53392	-0.0931851	0.126525	0.617221	0.613106	0.0277564	0.0484625
		133.053	14.118	3.72191e+06	2.86278e+06	3.04838e+06	3.18561e+06	3.72191e+06	2.87413e+06	3.336e+06	156061	122931	132016	3.53103e+06	3.14939e+06	3.66503e+06	5.34313	12.8207	12.4951	7.75844	3.27616e+06	3.24635e+06	3.53203e+06	4.40351e+06	3.35156e+06	3.78567e+06	271587	212340	217145	3.73632e+06	3.14939e+06	3.85627e+06	3.35151e+06	3.84691e+06	233691	3.58066e+06	157044	528643	32907.3	378275	0.936005	1.07436	0.0652647	-0.0954116	0.103477	-3.93755	0.38741	0.517213	0.00010734
		234.974	16.059	772407	413044	772407	620858	323838	473251	549278	549588	614627	630483	572390	724364	753160	29.964	25.5562	7.16557	14.2144	472685	822569	688373	383143	551863	623318	956429	1.06165e+06	1.03704e+06	605668	724364	792459	661209	519441	1.01837e+06	707497	176517	123326	55038	94530.8	0.934576	0.734196	1.4394	-0.0976168	-0.445763	0.525471	0.709331	0.104101	0.00791511
		584.33	16.765	2.02999e+06	1.44893e+06	1.63651e+06	1.68103e+06	1.11233e+06	1.29855e+06	1.23635e+06	1.59228e+06	1.58631e+06	1.65152e+06	1.62307e+06	2.02999e+06	1.80544e+06	7.75263	7.79785	2.23921	11.2022	1.65815e+06	1.74279e+06	1.86383e+06	1.31604e+06	1.51425e+06	1.40301e+06	2.77099e+06	2.74003e+06	2.71649e+06	1.71743e+06	2.02999e+06	1.89964e+06	1.75493e+06	1.4111e+06	2.74251e+06	1.88236e+06	103374	99353.3	27332.7	156994	0.932303	0.749644	1.45695	-0.101129	-0.415723	0.542956	0.305453	0.0117518	0.000728889
		177.942	1.317	1.39577e+08	6.74354e+07	9.77031e+07	1.34838e+08	6.64865e+07	1.24046e+08	1.31714e+08	7.27966e+07	8.63366e+07	1.38378e+08	6.80958e+07	1.35943e+08	1.39577e+08	33.7621	33.1911	34.9126	35.1512	7.71728e+07	1.04048e+08	1.49501e+08	7.86623e+07	1.44652e+08	1.49469e+08	1.26685e+08	1.49129e+08	2.27609e+08	7.20548e+07	1.35943e+08	1.4686e+08	1.10241e+08	1.24261e+08	1.67808e+08	1.18286e+08	3.65595e+07	3.95629e+07	5.29913e+07	4.04078e+07	0.931984	1.05051	1.41866	-0.101623	0.0710927	0.504533	0.810775	0.8637	0.267478
		193.045	14.121	3.22539e+08	2.52255e+08	2.57843e+08	2.6575e+08	2.62726e+08	2.57019e+08	2.50169e+08	1.35488e+07	1.3941e+07	1.35061e+07	3.01256e+08	3.22539e+08	2.65701e+08	2.62199	2.44984	1.75401	9.6851	2.88679e+08	2.74588e+08	2.94649e+08	3.1084e+08	2.99713e+08	2.83891e+08	2.35785e+07	2.40803e+07	2.22155e+07	3.1877e+08	3.22539e+08	2.79565e+08	2.85972e+08	2.98148e+08	2.32914e+07	3.06958e+08	1.03007e+07	1.35425e+07	964984	2.37979e+07	0.931632	0.971298	0.0758781	-0.102167	-0.0420145	-3.72017	0.233624	0.607024	3.26197e-05
		166.986	16.242	4.8403e+07	3.04126e+07	3.75838e+07	3.8209e+07	1.67136e+07	1.75354e+07	2.09295e+07	3.68502e+07	4.49645e+07	4.1519e+07	3.51724e+07	3.76995e+07	4.8403e+07	12.2369	12.1509	9.90604	17.3748	3.4804e+07	4.00246e+07	4.23641e+07	1.97744e+07	2.04482e+07	2.37507e+07	6.4129e+07	7.76673e+07	6.82921e+07	3.72173e+07	3.76995e+07	5.09286e+07	3.90642e+07	2.13244e+07	7.00295e+07	4.19484e+07	3.87046e+06	2.12803e+06	6.93432e+06	7.78076e+06	0.931244	0.508349	1.66942	-0.102769	-0.976109	0.739345	0.596179	0.0114361	0.00954186
	C8 H6 O4	166.027	14.117	2.9725e+08	2.4374e+08	2.34475e+08	2.53207e+08	2.18406e+08	2.4819e+08	2.57248e+08	1.16522e+07	1.23412e+07	1.35025e+07	2.64489e+08	2.9725e+08	2.83553e+08	3.84151	8.42236	7.48188	5.83942	2.78935e+08	2.49703e+08	2.80742e+08	2.58403e+08	2.89416e+08	2.91924e+08	2.02779e+07	2.13169e+07	2.22094e+07	2.79866e+08	2.9725e+08	2.98349e+08	2.69793e+08	2.79914e+08	2.12681e+07	2.91822e+08	1.74221e+07	1.86714e+07	966681	1.03683e+07	0.924513	0.959196	0.0728804	-0.113234	-0.0601021	-3.77833	0.132978	0.388886	1.45821e-06
	C8 H4 O3	148.016	14.121	2.96452e+08	2.43048e+08	2.33824e+08	2.52499e+08	2.17746e+08	2.47921e+08	2.568e+08	1.15977e+07	1.2265e+07	1.34258e+07	2.63658e+08	2.96452e+08	2.83247e+08	3.8406	8.50091	7.44277	5.86947	2.78143e+08	2.4901e+08	2.79957e+08	2.57622e+08	2.89103e+08	2.91416e+08	2.0183e+07	2.11853e+07	2.20833e+07	2.78986e+08	2.96452e+08	2.98026e+08	2.69036e+08	2.7938e+08	2.11505e+07	2.91155e+08	1.73676e+07	1.88788e+07	950614	1.05675e+07	0.924033	0.95956	0.0726437	-0.113984	-0.0595546	-3.78302	0.132605	0.399252	1.58429e-06
		426.273	15.937	712142	478942	632010	607333	325356	334273	406050	339555	352571	394542	603376	712142	669273	14.3483	12.4541	7.93338	8.28115	548099	673055	673378	384939	389799	460784	590915	608996	648959	638455	712142	704195	631510	411841	616290	684931	72236.7	42456	29701.9	40444.9	0.922006	0.601288	0.899784	-0.117152	-0.733872	-0.152349	0.326317	0.00128273	0.0768816
	C15 H20 O6	296.126	13.896	4.97866e+06	2.37498e+06	1.97146e+06	2.10483e+06	1.86057e+06	2.15727e+06	1.56086e+06	3.37431e+06	4.83148e+06	4.97866e+06	2.738e+06	2.45765e+06	2.28896e+06	9.56024	16.0362	20.1794	9.09149	2.71791e+06	2.0995e+06	2.33372e+06	2.2013e+06	2.51561e+06	1.77126e+06	5.87218e+06	8.34543e+06	8.1891e+06	2.89718e+06	2.45765e+06	2.4084e+06	2.38371e+06	2.16272e+06	7.4689e+06	2.58774e+06	312225	373673	1.38501e+06	269112	0.921154	0.835757	2.88626	-0.118486	-0.258844	1.5292	0.439581	0.185149	0.00390117
		169.11	13.622	2.98005e+06	2.3866e+06	2.52035e+06	2.46716e+06	1.54795e+06	1.76981e+06	1.96839e+06	2.24521e+06	2.33468e+06	2.22863e+06	2.85543e+06	2.98005e+06	2.71435e+06	2.73975	11.9364	2.51351	4.66448	2.73121e+06	2.68403e+06	2.73546e+06	1.83143e+06	2.06379e+06	2.23372e+06	3.90726e+06	4.03269e+06	3.66574e+06	3.02144e+06	2.98005e+06	2.85598e+06	2.7169e+06	2.04298e+06	3.86857e+06	2.95249e+06	28542.3	201950	186510	86106	0.920206	0.691952	1.31027	-0.119971	-0.531255	0.389868	0.0108369	0.00199758	0.00151277
		327.886	1.434	1.17397e+07	5.86831e+06	6.43339e+06	2.53934e+06	1.0935e+07	6.43246e+06	3.80942e+06	1.10069e+07	3.79631e+06	1.54921e+06	3.92211e+06	1.17397e+07	1.87633e+06	42.5339	51.054	90.6499	89.0438	6.71566e+06	6.85119e+06	2.81548e+06	1.29376e+07	7.50095e+06	4.32291e+06	1.91549e+07	6.55737e+06	2.5482e+06	4.15013e+06	1.17397e+07	1.97423e+06	5.46078e+06	8.25382e+06	9.42015e+06	5.95468e+06	2.29189e+06	4.35641e+06	8.66557e+06	5.12673e+06	0.917056	1.38611	1.58197	-0.124918	0.471038	0.661725	0.886298	0.585742	0.583172
		95.9869	1.789	1.0483e+07	7.99408e+06	1.68557e+06	8.39103e+06	7.78306e+06	5.71986e+06	8.07042e+06	1.0483e+07	1.41656e+06	1.82892e+06	8.03636e+06	9.58586e+06	3.80102e+06	62.4556	17.8306	111.876	41.9339	9.14838e+06	1.79504e+06	9.30351e+06	9.20838e+06	6.66999e+06	9.15827e+06	1.82431e+07	2.44684e+06	3.00828e+06	8.50358e+06	9.58586e+06	3.99936e+06	6.74898e+06	8.34555e+06	7.89941e+06	7.36293e+06	4.29094e+06	1.45129e+06	8.96232e+06	2.96278e+06	0.916616	1.13345	1.07286	-0.125611	0.180727	0.101466	0.84836	0.633146	0.926318
		470.299	15.759	2.71665e+06	1.74279e+06	2.28853e+06	2.54363e+06	1.35914e+06	1.40669e+06	1.56496e+06	1.18433e+06	1.42783e+06	1.21768e+06	2.28936e+06	2.65288e+06	2.71665e+06	18.6669	7.46466	10.341	9.02883	1.99444e+06	2.43716e+06	2.82023e+06	1.60805e+06	1.64036e+06	1.77591e+06	2.06104e+06	2.46629e+06	2.00288e+06	2.42246e+06	2.65288e+06	2.8584e+06	2.41728e+06	1.67477e+06	2.17674e+06	2.64458e+06	413253	89068.8	252438	218089	0.91405	0.633284	0.823093	-0.129656	-0.659075	-0.280873	0.446909	0.00204542	0.0720538
	C8 H6 O4	166.026	13.355	3.3621e+07	54654.7	89928.5	103385	907316	1.39779e+06	1.31665e+06	3.3621e+07	2.59025e+07	2.75008e+07	81513.9	101294	105595	30.4467	21.7768	14.0443	13.3594	62546.5	95768.8	114628	1.07347e+06	1.62998e+06	1.49412e+06	5.85093e+07	4.47415e+07	4.52345e+07	86252.9	101294	111105	90981	1.39919e+06	4.94951e+07	99550.7	26368.6	290144	7.81043e+06	12517.4	0.913916	14.0551	497.185	-0.129866	3.81302	8.95764	0.637852	0.00149268	0.000394555
		489.885	1.445	1.07387e+06	562354	904780	984136	544377	800970	881581	652528	985177	1.01691e+06	783305	1.00312e+06	1.07387e+06	27.4325	23.7218	22.8102	15.892	643555	963539	1.09116e+06	644070	934019	1.00041e+06	1.13557e+06	1.7017e+06	1.67266e+06	828845	1.00312e+06	1.1299e+06	899417	859501	1.50331e+06	987288	230587	189499	318802	151150	0.910997	0.870568	1.52267	-0.134481	-0.199972	0.6066	0.610327	0.412846	0.0644421
	C8 H6 O4	166.026	12.033	1.28057e+06	956469	1.05434e+06	1.13569e+06	926071	815150	877005	1.1411e+06	1.26638e+06	1.28057e+06	1.23374e+06	1.23022e+06	1.23281e+06	8.55611	6.36884	6.24386	0.147871	1.09458e+06	1.12281e+06	1.2592e+06	1.09566e+06	950554	995222	1.98581e+06	2.18742e+06	2.10634e+06	1.30546e+06	1.23022e+06	1.29714e+06	1.15886e+06	1.01381e+06	2.09319e+06	1.27761e+06	88030.3	74320	101448	41248.5	0.907056	0.793524	1.63836	-0.140737	-0.333655	0.712256	0.101838	0.00578629	0.000208307
		381.858	1.226	2.40811e+07	1.2772e+07	2.22775e+07	2.39149e+07	1.29292e+07	2.00126e+07	2.00213e+07	1.2323e+07	2.15953e+07	2.32187e+07	2.26384e+07	2.40811e+07	2.24132e+07	30.6115	23.179	30.8644	3.92721	1.46162e+07	2.37242e+07	2.65155e+07	1.5297e+07	2.33369e+07	2.27201e+07	2.14452e+07	3.73016e+07	3.8191e+07	2.39545e+07	2.40811e+07	2.35827e+07	2.16187e+07	2.04513e+07	3.23126e+07	2.38728e+07	6.22281e+06	4.47443e+06	9.42195e+06	259078	0.905578	0.85668	1.35354	-0.143089	-0.223171	0.436732	0.56475	0.256633	0.195861
		211.118	13.872	3.9131e+06	2.3105e+06	3.58122e+06	3.40606e+06	2.03228e+06	2.78747e+06	2.98644e+06	2.36674e+06	2.55515e+06	1.65193e+06	3.21249e+06	3.79323e+06	3.9131e+06	22.2209	19.3452	21.745	10.2955	2.64412e+06	3.8138e+06	3.77645e+06	2.40445e+06	3.2505e+06	3.389e+06	4.11875e+06	4.41352e+06	2.71716e+06	3.39926e+06	3.79323e+06	4.11728e+06	3.41146e+06	3.01465e+06	3.74981e+06	3.76992e+06	664798	532963	906365	359578	0.904915	0.799659	0.994665	-0.144145	-0.322544	-0.00771689	0.457521	0.11161	0.973214
		150.067	14.101	6.6494e+06	3.84818e+06	6.0292e+06	5.80182e+06	3.4892e+06	4.57796e+06	4.73258e+06	2.51805e+06	2.93234e+06	2.96093e+06	5.91343e+06	5.84179e+06	6.6494e+06	22.9407	15.8829	8.83997	7.2867	4.40384e+06	6.42076e+06	6.43274e+06	4.12818e+06	5.3384e+06	5.37051e+06	4.38208e+06	5.06504e+06	4.87025e+06	6.25722e+06	5.84179e+06	6.99636e+06	5.75245e+06	4.9457e+06	4.77246e+06	6.36512e+06	1.16794e+06	708174	351826	584798	0.903745	0.776999	0.749782	-0.146012	-0.364014	-0.415456	0.462124	0.0554072	0.0155778
		177.942	1.499	7.11447e+07	5.28701e+07	5.68693e+07	6.45308e+07	5.30016e+07	5.72789e+07	6.08411e+07	5.89104e+07	6.37526e+07	7.11447e+07	6.81006e+07	6.81785e+07	7.00649e+07	10.2004	6.88136	9.53719	1.61714	6.05043e+07	6.05626e+07	7.15482e+07	6.27079e+07	6.67935e+07	6.90422e+07	1.0252e+08	1.1012e+08	1.17022e+08	7.20599e+07	6.81785e+07	7.37208e+07	6.4205e+07	6.61812e+07	1.09887e+08	7.13197e+07	6.35944e+06	3.21123e+06	7.25382e+06	2.84435e+06	0.900242	0.927951	1.54077	-0.151615	-0.10788	0.62365	0.151637	0.106657	0.00101654
		270.139	17.399	6.5881e+06	4.75636e+06	5.46675e+06	5.32171e+06	3.67828e+06	3.27093e+06	3.57831e+06	6.14727e+06	5.1257e+06	5.08485e+06	6.5881e+06	5.7637e+06	6.01903e+06	7.2439	6.04961	11.0395	6.89188	5.44315e+06	5.82178e+06	5.90043e+06	4.35189e+06	3.81427e+06	4.06065e+06	1.06979e+07	8.85363e+06	8.36378e+06	6.97112e+06	5.7637e+06	6.33309e+06	5.72179e+06	4.0756e+06	9.30509e+06	6.35597e+06	244488	269121	1.2308e+06	604032	0.900223	0.641225	1.46399	-0.151646	-0.641098	0.549908	0.167142	0.00394749	0.0203731
		111.964	1.447	1.39374e+06	744591	1.11216e+06	1.08322e+06	1.04668e+06	1.39374e+06	1.39038e+06	868071	978521	900527	1.07124e+06	1.28914e+06	1.11742e+06	20.8547	15.6163	6.19937	9.90433	852107	1.18439e+06	1.20101e+06	1.23836e+06	1.62525e+06	1.57779e+06	1.51067e+06	1.6902e+06	1.48122e+06	1.13352e+06	1.28914e+06	1.17573e+06	1.07917e+06	1.48047e+06	1.5607e+06	1.19946e+06	196818	211009	113115	80478.3	0.89971	1.23428	1.30116	-0.152468	0.303664	0.379803	0.382629	0.0974151	0.0107645
		201.136	14.342	1.47317e+06	1.02605e+06	1.30325e+06	1.2175e+06	864168	968711	946039	998029	1.1466e+06	1.08668e+06	1.33329e+06	1.47317e+06	1.39374e+06	12.0037	5.9369	6.93986	5.01073	1.17421e+06	1.38788e+06	1.34989e+06	1.02242e+06	1.12962e+06	1.07356e+06	1.73683e+06	1.98053e+06	1.78742e+06	1.41081e+06	1.47317e+06	1.46646e+06	1.30399e+06	1.0752e+06	1.83493e+06	1.45015e+06	113992	53618.1	128610	34232.8	0.899215	0.741444	1.26534	-0.153262	-0.43159	0.339524	0.100561	0.000518776	0.00744988
		215.152	14.944	5.96063e+06	3.99452e+06	4.94767e+06	5.07342e+06	3.1167e+06	3.83891e+06	3.64774e+06	4.33121e+06	4.73809e+06	4.41491e+06	5.07933e+06	5.64889e+06	5.96063e+06	12.6279	10.5872	4.7804	8.03338	4.57131e+06	5.26899e+06	5.62513e+06	3.68746e+06	4.47659e+06	4.13944e+06	7.53745e+06	8.18412e+06	7.26182e+06	5.37463e+06	5.64889e+06	6.27165e+06	5.15514e+06	4.10116e+06	7.66113e+06	5.76506e+06	536051	395955	473424	459654	0.894205	0.711383	1.32889	-0.161322	-0.491301	0.410222	0.20898	0.00896863	0.00761369
		237.113	18.627	757762	519907	651641	655266	616982	724829	681973	611065	619890	647765	717483	757762	710282	12.6654	8.04936	3.05893	3.51247	594979	693961	726523	729971	845230	773900	1.06341e+06	1.07074e+06	1.06547e+06	759196	757762	747343	671821	783034	1.06654e+06	754767	68509.8	58169.8	3776.65	6469.07	0.890104	1.03745	1.41307	-0.167955	0.0530434	0.498836	0.105099	0.449929	2.21873e-07
		129.152	9.98	7.59597e+07	6.78696e+07	5.46949e+07	6.46737e+07	5.85037e+07	6.0119e+07	5.92242e+07	7.15748e+07	7.17362e+07	7.11524e+07	7.59597e+07	7.53252e+07	7.46407e+07	11.0109	1.36503	0.421673	0.875956	7.76697e+07	5.8247e+07	7.17067e+07	6.92176e+07	7.01054e+07	6.72073e+07	1.24559e+08	1.2391e+08	1.17034e+08	8.03759e+07	7.53252e+07	7.85354e+07	6.92078e+07	6.88434e+07	1.21835e+08	7.80788e+07	9.94955e+06	1.48482e+06	4.16964e+06	2.5561e+06	0.886383	0.881717	1.5604	-0.173997	-0.181613	0.64192	0.209052	0.0056495	0.000101231
		143.94	1.017	1.19117e+06	17314.6	1.19117e+06	1.18887e+06	533611	870118	816486	833714	1.05583e+06	1.04289e+06	838170	1.07318e+06	934346	84.7262	24.4301	12.7544	12.4553	19814.8	1.26852e+06	1.31815e+06	631332	1.01465e+06	926545	1.45088e+06	1.82374e+06	1.71539e+06	886900	1.07318e+06	983100	868830	857510	1.66334e+06	981058	735687	200769	191802	93154.8	0.885605	0.874066	1.69545	-0.175265	-0.194185	0.761671	0.806168	0.388368	0.00518317
		151.009	15.154	1.93862e+06	1.28628e+06	1.64212e+06	1.77986e+06	854374	1.62889e+06	1.53203e+06	1.66195e+06	1.74001e+06	1.68886e+06	1.79752e+06	1.93862e+06	1.93849e+06	16.2285	31.529	2.33694	4.30468	1.47202e+06	1.74877e+06	1.97341e+06	1.01084e+06	1.89947e+06	1.73854e+06	2.89222e+06	3.00553e+06	2.7779e+06	1.90203e+06	1.93862e+06	2.03964e+06	1.7314e+06	1.54961e+06	2.89188e+06	1.9601e+06	251149	473482	113816	71276.7	0.883323	0.790581	1.47538	-0.178987	-0.339014	0.561086	0.203793	0.211756	0.000274824
		183.162	15.527	1.33497e+06	954249	1.04374e+06	1.01709e+06	793714	871494	848781	929626	937955	992240	1.1336e+06	1.33497e+06	1.18871e+06	4.57206	4.77274	3.56687	8.53642	1.09204e+06	1.11153e+06	1.12769e+06	939069	1.01626e+06	963193	1.61779e+06	1.62013e+06	1.63208e+06	1.1995e+06	1.33497e+06	1.25074e+06	1.11042e+06	972840	1.62333e+06	1.26174e+06	17851.6	39488.2	7660.98	68400.2	0.880072	0.771032	1.28659	-0.184307	-0.375136	0.36355	0.0206988	0.00317775	0.000808875
		723.502	12.631	438055	364973	371445	299769	256105	291762	258028	222841	222993	209596	404298	418130	438055	11.4784	7.46527	3.52043	4.03888	417673	395568	332368	303006	340226	292809	387803	385177	344752	427803	418130	460912	381870	312014	372577	435615	44271.8	24958.8	24132.9	22435.3	0.876621	0.71626	0.85529	-0.189974	-0.481444	-0.225514	0.133959	0.00309821	0.0295548
		187.12	13.619	1.16755e+07	8.38814e+06	9.8311e+06	9.4989e+06	5.91638e+06	7.42136e+06	7.39514e+06	8.50992e+06	9.0579e+06	8.79728e+06	1.03755e+07	1.16755e+07	1.16704e+07	8.17888	12.4647	3.11889	6.66399	9.59934e+06	1.04696e+07	1.05319e+07	6.99985e+06	8.65413e+06	8.39197e+06	1.48095e+07	1.56457e+07	1.44701e+07	1.09787e+07	1.16755e+07	1.22793e+07	1.02003e+07	8.01531e+06	1.49751e+07	1.16445e+07	521339	889132	605050	650834	0.87597	0.688333	1.28602	-0.191046	-0.538821	0.362916	0.0399483	0.00466752	0.0029037
	C24 H28 O7	428.183	17.627	2.92591e+06	2.14751e+06	2.40887e+06	2.52317e+06	2.04369e+06	2.25635e+06	2.31255e+06	2.49601e+06	2.51002e+06	2.62504e+06	2.8805e+06	2.92591e+06	2.84038e+06	8.16011	6.43373	2.78325	1.48475	2.4576e+06	2.56531e+06	2.79755e+06	2.41796e+06	2.63116e+06	2.62427e+06	4.34372e+06	4.33557e+06	4.31777e+06	3.04797e+06	2.92591e+06	2.98859e+06	2.60682e+06	2.55779e+06	4.33235e+06	2.98749e+06	173734	121150	13268.4	61036.6	0.87258	0.856168	1.45017	-0.196641	-0.224034	0.536217	0.0231566	0.00537628	3.08734e-06
		276.06	13.683	1.0573e+06	536728	741686	732678	644034	833701	824994	965191	1.0573e+06	1.05594e+06	872355	821081	758090	17.2772	13.9503	5.14443	7.00372	614228	789853	812353	761977	972187	936199	1.67969e+06	1.82627e+06	1.73685e+06	923072	821081	797646	738812	890121	1.7476e+06	847266	108477	112426	73880.9	66687.1	0.871995	1.05058	2.06264	-0.197609	0.0711858	1.04449	0.214181	0.600497	9.69047e-05
		229.168	15.527	1.15713e+07	7.80433e+06	9.57068e+06	9.51826e+06	6.84316e+06	7.77138e+06	7.67377e+06	8.14584e+06	8.74298e+06	8.89147e+06	1.01817e+07	1.15713e+07	1.11143e+07	11.2112	6.86555	4.59275	6.46458	8.93123e+06	1.01922e+07	1.05533e+07	8.09636e+06	9.06229e+06	8.70816e+06	1.41759e+07	1.51018e+07	1.46251e+07	1.07736e+07	1.15713e+07	1.16943e+07	9.89226e+06	8.62227e+06	1.46342e+07	1.13464e+07	851635	488658	463006	499833	0.871843	0.759914	1.28977	-0.19786	-0.396093	0.367116	0.0632689	0.0025115	0.00112028
	C11 H12 O5	224.068	15.333	6.94011e+06	6.03874e+06	5.2072e+06	5.35706e+06	6.34432e+06	6.2842e+06	6.20619e+06	25638.2	27190.3	40019.3	6.7265e+06	6.73928e+06	6.94011e+06	8.0084	1.10313	25.5035	1.76138	6.91071e+06	5.54537e+06	5.93962e+06	7.50617e+06	7.32806e+06	7.04276e+06	44617.2	46965.9	65825.4	7.11756e+06	6.73928e+06	7.30224e+06	6.1319e+06	7.29233e+06	52469.5	7.05303e+06	702685	233762	11626	286972	0.8694	1.03393	0.00743929	-0.201908	0.0481373	-7.07062	0.103424	0.325482	1.88165e-06
	C24 H30 O8	446.194	16.912	7.22393e+06	4.64663e+06	6.19704e+06	5.871e+06	4.58068e+06	5.78472e+06	5.70934e+06	6.15147e+06	6.69888e+06	6.55451e+06	6.46151e+06	6.80465e+06	7.22393e+06	14.6715	12.587	4.3861	5.59062	5.31758e+06	6.5995e+06	6.50944e+06	5.41955e+06	6.74562e+06	6.47893e+06	1.07052e+07	1.1571e+07	1.07811e+07	6.83717e+06	6.80465e+06	7.60086e+06	6.14217e+06	6.2147e+06	1.10191e+07	7.08089e+06	715538	701411	479456	450601	0.867429	0.877672	1.55617	-0.205183	-0.188246	0.638003	0.126862	0.146306	0.000488719
		141.115	13.622	971878	730912	803817	752188	557879	605917	527478	701777	798410	780976	971509	971878	868338	4.91811	7.01521	6.77302	6.36682	836452	856020	833984	660044	706566	598579	1.22128e+06	1.3791e+06	1.28458e+06	1.02799e+06	971878	913647	842152	655063	1.29498e+06	971172	12073.1	54165.4	79421.8	57175	0.86715	0.674508	1.33342	-0.205646	-0.568093	0.415136	0.0187111	0.00224954	0.00458982
		150.067	16.919	594394	277283	441961	394988	295066	496756	465222	389285	578455	594394	431865	460241	478450	22.8408	25.8927	21.9118	5.13876	317321	470663	437941	349102	579272	527932	677459	999166	977684	456973	460241	503415	408642	485435	884770	473543	80760.8	120826	179857	25921.4	0.862945	1.02511	1.8684	-0.212659	0.0357844	0.901807	0.255695	0.875703	0.0172524
		205.94	1.019	4.62579e+06	31905.5	4.62579e+06	4.35984e+06	2.267e+06	3.96692e+06	3.29282e+06	3.156e+06	3.98283e+06	3.83888e+06	3.93707e+06	3.8298e+06	3.20656e+06	85.7974	26.9558	12.0714	10.784	36512.5	4.92621e+06	4.83396e+06	2.68215e+06	4.62586e+06	3.73668e+06	5.49226e+06	6.87955e+06	6.31435e+06	4.16596e+06	3.8298e+06	3.37387e+06	3.26556e+06	3.68156e+06	6.22872e+06	3.78988e+06	2.79682e+06	973025	697597	397550	0.861653	0.97142	1.64352	-0.214822	-0.0418327	0.716785	0.763947	0.867018	0.00625015
	C23 H18 O11	470.083	16.4	3.74e+06	2.1956e+06	3.36054e+06	3.28064e+06	2.01561e+06	2.81815e+06	2.64775e+06	551109	787683	821017	3.60546e+06	3.62135e+06	3.74e+06	22.092	16.955	20.4402	2.01116	2.51263e+06	3.57879e+06	3.63739e+06	2.38473e+06	3.28627e+06	3.00466e+06	959074	1.36057e+06	1.35044e+06	3.81507e+06	3.62135e+06	3.93515e+06	3.24294e+06	2.89189e+06	1.22336e+06	3.79052e+06	633141	461227	228935	158332	0.855538	0.762926	0.322742	-0.225095	-0.390386	-1.63155	0.219817	0.0331585	8.97883e-05
		389.928	1.535	4.23011e+06	2.00233e+06	2.82023e+06	2.6349e+06	1.74812e+06	2.752e+06	4.18351e+06	1.2786e+06	3.04025e+06	3.39184e+06	1.82029e+06	3.23151e+06	4.23011e+06	17.2518	42.2844	44.055	39.1336	2.29145e+06	3.00339e+06	2.92143e+06	2.06825e+06	3.20914e+06	4.74743e+06	2.2251e+06	5.25143e+06	5.57904e+06	1.92612e+06	3.23151e+06	4.45083e+06	2.73876e+06	3.34161e+06	4.35186e+06	3.20282e+06	389539	1.34449e+06	1.8491e+06	1.2626e+06	0.855108	1.04333	1.35876	-0.225821	0.0611995	0.442288	0.57583	0.902595	0.424303
		185.933	1.018	6.84064e+06	31938.2	4.98791e+06	4.99956e+06	3.74831e+06	3.82841e+06	5.61695e+06	3.52833e+06	6.84064e+06	4.59103e+06	3.92471e+06	4.35446e+06	4.02142e+06	85.7745	24.0228	33.9149	5.49834	36549.9	5.31185e+06	5.54324e+06	4.43475e+06	4.46434e+06	6.37408e+06	6.14023e+06	1.18159e+07	7.55152e+06	4.15289e+06	4.35446e+06	4.23125e+06	3.63055e+06	5.09106e+06	8.50254e+06	4.2462e+06	3.11464e+06	1.11123e+06	2.95491e+06	101612	0.855011	1.19897	2.00239	-0.225985	0.261794	1.00172	0.749438	0.259934	0.0672379
		389.928	1.583	3.90756e+06	1.89053e+06	2.82023e+06	3.28276e+06	1.74812e+06	1.37108e+06	3.59687e+06	1.2786e+06	3.04025e+06	3.16413e+06	2.41239e+06	3.65665e+06	3.90756e+06	26.6113	53.2112	42.2828	24.0772	2.16351e+06	3.00339e+06	3.63974e+06	2.06825e+06	1.59883e+06	4.08171e+06	2.2251e+06	5.25143e+06	5.20448e+06	2.55264e+06	3.65665e+06	4.11145e+06	2.93555e+06	2.58293e+06	4.227e+06	3.44025e+06	740450	1.31903e+06	1.73386e+06	801619	0.853296	0.750798	1.22869	-0.228882	-0.413503	0.297123	0.467981	0.390512	0.515021
		187.93	1.019	6.67697e+06	48881.5	6.67697e+06	6.4452e+06	3.43048e+06	6.09845e+06	3.90821e+06	4.88746e+06	6.28295e+06	5.83078e+06	5.19119e+06	5.53688e+06	5.47655e+06	85.679	31.7621	12.5639	3.41849	55939.8	7.1106e+06	7.14608e+06	4.05871e+06	7.11146e+06	4.43502e+06	8.50547e+06	1.08525e+07	9.59071e+06	5.49299e+06	5.53688e+06	5.76231e+06	4.77087e+06	5.20173e+06	9.64958e+06	5.5974e+06	4.08329e+06	1.66454e+06	1.17464e+06	144500	0.852338	0.929312	1.72394	-0.230502	-0.105764	0.78571	0.74373	0.702699	0.00405209
	C7 H4 O2	120.021	14.121	3.97844e+07	2.8966e+07	3.02633e+07	3.02134e+07	3.39208e+07	3.39706e+07	3.4744e+07	1.90752e+06	2.05466e+06	1.83978e+06	3.62977e+07	3.57934e+07	3.97844e+07	2.46523	1.34924	5.68039	5.82788	3.31486e+07	3.22287e+07	3.3499e+07	4.01327e+07	3.96134e+07	3.94273e+07	3.31959e+06	3.54902e+06	3.02614e+06	3.8408e+07	3.57934e+07	4.18604e+07	3.29587e+07	3.97245e+07	3.29825e+06	3.86872e+07	656088	365562	262090	3.0431e+06	0.851928	1.02681	0.0852542	-0.231197	0.0381711	-3.55209	0.033303	0.589247	3.63887e-05
		255.843	12.432	1.52838e+06	1.06025e+06	1.18788e+06	1.08168e+06	1.11415e+06	1.02604e+06	889538	782856	725914	758171	1.52838e+06	1.40523e+06	1.23814e+06	6.15766	11.2062	3.77885	10.4757	1.21335e+06	1.26502e+06	1.1993e+06	1.31819e+06	1.19647e+06	1.00944e+06	1.36238e+06	1.25387e+06	1.24707e+06	1.61724e+06	1.40523e+06	1.30275e+06	1.22589e+06	1.1747e+06	1.28777e+06	1.44174e+06	34610.4	155520	64697.1	160393	0.850288	0.814782	0.89321	-0.233977	-0.295515	-0.162929	0.0849338	0.107197	0.197956
	C20 H18 O9	402.095	16.394	9.37896e+07	5.45412e+07	6.41871e+07	7.02435e+07	4.69731e+07	4.96893e+07	5.47157e+07	1.04288e+07	1.32187e+07	1.2852e+07	9.37896e+07	6.96412e+07	7.30725e+07	12.5721	7.78512	12.4606	16.5723	6.24167e+07	6.83557e+07	7.78821e+07	5.55753e+07	5.79431e+07	6.20911e+07	1.81488e+07	2.28327e+07	2.11394e+07	9.92423e+07	6.96412e+07	7.68853e+07	6.95515e+07	5.85365e+07	2.0707e+07	8.1923e+07	7.80176e+06	3.29816e+06	2.37169e+06	1.54302e+07	0.848987	0.714531	0.252762	-0.236186	-0.484931	-1.98415	0.28298	0.0621651	0.00245424
	C14 H22 O5	270.147	16.754	2.58209e+06	1.36813e+06	1.76691e+06	1.77105e+06	1.08998e+06	1.27768e+06	1.23486e+06	2.43603e+06	2.58209e+06	2.30475e+06	1.9518e+06	2.05908e+06	2.16242e+06	14.1521	8.19152	5.68362	5.11803	1.56569e+06	1.88166e+06	1.96365e+06	1.28959e+06	1.48992e+06	1.40131e+06	4.23934e+06	4.46005e+06	3.79095e+06	2.06528e+06	2.05908e+06	2.27526e+06	1.80366e+06	1.3936e+06	4.16344e+06	2.1332e+06	210133	100386	340946	123061	0.845519	0.653291	1.95173	-0.242091	-0.614201	0.964756	0.0790396	0.00128298	0.000631944
	C17 H26 O4	294.184	18.626	5.12282e+06	3.44038e+06	4.02137e+06	4.18313e+06	293044	4.61491e+06	4.42528e+06	4.71808e+06	4.39901e+06	4.14538e+06	5.12282e+06	5.07201e+06	4.66621e+06	10.0626	78.5043	6.49141	5.05176	3.93716e+06	4.28254e+06	4.63802e+06	346710	5.3815e+06	5.02179e+06	8.2107e+06	7.59842e+06	6.81848e+06	5.42065e+06	5.07201e+06	4.90969e+06	4.28591e+06	3.58333e+06	7.54253e+06	5.13412e+06	350445	2.80876e+06	697789	261079	0.834789	0.697945	1.4691	-0.260516	-0.518814	0.554933	0.0282563	0.394915	0.00499509
		142.983	1.789	9.01244e+06	4.08193e+06	3.90978e+06	1.97018e+06	9.01244e+06	3.33568e+06	1.46882e+06	4.1124e+06	1.77737e+06	1.44639e+06	8.54667e+06	2.74e+06	1.35406e+06	35.3152	85.3059	59.4234	90.5647	4.67134e+06	4.1637e+06	2.18443e+06	1.06629e+07	3.88978e+06	1.66681e+06	7.15667e+06	3.07005e+06	2.37908e+06	9.04355e+06	2.74e+06	1.42472e+06	3.67316e+06	5.4065e+06	4.20193e+06	4.40276e+06	1.31402e+06	4.68591e+06	2.58209e+06	4.0725e+06	0.834285	1.22798	0.954387	-0.261387	0.296287	-0.0673536	0.782451	0.793337	0.945958
	C15 H20 O6	296.126	16.912	1.8678e+06	1.14462e+06	1.37041e+06	1.34223e+06	1.1851e+06	1.68975e+06	1.57813e+06	1.40602e+06	1.8678e+06	1.67112e+06	1.56207e+06	1.69187e+06	1.68083e+06	9.56911	17.8585	14.0588	4.37484	1.3099e+06	1.45941e+06	1.48819e+06	1.40213e+06	1.97044e+06	1.79085e+06	2.44684e+06	3.22625e+06	2.74872e+06	1.65289e+06	1.69187e+06	1.76854e+06	1.41917e+06	1.72114e+06	2.80727e+06	1.70443e+06	95716.9	290496	392990	58838.4	0.832633	1.0098	1.64704	-0.264247	0.0140745	0.719878	0.011713	0.926912	0.00860386
	C24 H24 O10	472.137	16.193	1.68736e+07	1.02897e+07	1.21879e+07	1.37619e+07	1.05513e+07	1.24556e+07	1.27869e+07	820118	854460	1.0253e+06	1.4801e+07	1.48887e+07	1.68736e+07	14.3929	10.1124	12.2115	7.5518	1.17755e+07	1.29795e+07	1.52585e+07	1.24835e+07	1.45246e+07	1.45105e+07	1.42722e+06	1.47591e+06	1.68646e+06	1.56615e+07	1.48887e+07	1.7754e+07	1.33378e+07	1.38395e+07	1.52986e+06	1.61014e+07	1.76893e+06	1.17436e+06	137782	1.48247e+06	0.828365	0.859525	0.0950144	-0.271662	-0.218388	-3.39571	0.106753	0.107055	7.10051e-05
	C8 H4 O3	148.016	12.038	1.81833e+06	1.33514e+06	1.10457e+06	1.54937e+06	958960	1.07765e+06	1.16397e+06	1.31273e+06	1.36148e+06	1.21734e+06	1.68126e+06	1.81833e+06	1.65514e+06	16.7294	9.64804	5.6518	5.10171	1.52793e+06	1.1763e+06	1.71785e+06	1.13458e+06	1.25666e+06	1.32087e+06	2.2845e+06	2.35169e+06	2.00234e+06	1.779e+06	1.81833e+06	1.7415e+06	1.47403e+06	1.23737e+06	2.21284e+06	1.77961e+06	274769	94633.9	185371	38420.7	0.828287	0.695303	1.24344	-0.271798	-0.524286	0.314338	0.129083	0.00077689	0.0166257
	C9 H6 O3	162.031	15.333	3.45469e+07	2.54345e+07	2.39678e+07	2.60115e+07	2.88013e+07	2.98158e+07	2.87984e+07	21099.2	26207.7	21256.7	3.21585e+07	3.45469e+07	3.08392e+07	4.19131	2.0131	12.7107	5.78001	2.91072e+07	2.55244e+07	2.88401e+07	3.40757e+07	3.47685e+07	3.26802e+07	36718.2	45268.6	34963.9	3.40281e+07	3.45469e+07	3.24484e+07	2.78239e+07	3.38415e+07	38983.5	3.36745e+07	1.99589e+06	1.06365e+06	5513.22	1.09306e+06	0.826261	1.00496	0.00115766	-0.275331	0.00713779	-9.75457	0.0112197	0.858801	7.4181e-07
		364.113	14.445	4.87391e+06	1.78449e+06	4.17025e+06	4.36159e+06	2.29361e+06	3.81261e+06	3.83079e+06	151575	253422	268851	3.95731e+06	4.42487e+06	4.87391e+06	41.7546	26.6365	28.3703	10.3726	2.04216e+06	4.44108e+06	4.83589e+06	2.71364e+06	4.44593e+06	4.34717e+06	263780	437736	442217	4.18738e+06	4.42487e+06	5.12823e+06	3.77304e+06	3.83558e+06	381244	4.58016e+06	1.51194e+06	972878	101752	489270	0.82378	0.837434	0.0832382	-0.279669	-0.255953	-3.58661	0.428696	0.301867	0.000129653
	C9 H8 O	132.058	16.917	638814	330750	460223	447719	390567	433606	483560	494737	548073	638814	522638	549681	534942	17.2962	10.6764	12.9952	2.52718	378509	490111	496407	462092	505632	548742	860973	946688	1.05075e+06	553023	549681	562854	455009	505489	952803	555186	66325.7	43325.2	95035.1	6847.94	0.819561	0.910485	1.71619	-0.287077	-0.135293	0.779207	0.0599078	0.121216	0.00194357
	C23 H24 O12	492.127	14.098	2.6163e+06	1.53968e+06	1.99235e+06	1.91904e+06	1.55653e+06	1.93186e+06	1.95073e+06	9914.59	7220.97	13177.9	2.1621e+06	2.45348e+06	2.6163e+06	13.3716	12.2637	29.5215	9.54589	1.76201e+06	2.12174e+06	2.12773e+06	1.84158e+06	2.25276e+06	2.21368e+06	17254	12472.8	21675.5	2.2878e+06	2.45348e+06	2.75282e+06	2.00382e+06	2.10267e+06	17134.1	2.49803e+06	209441	226958	4602.54	235691	0.80216	0.84173	0.00685904	-0.318038	-0.24857	-7.18778	0.0532697	0.104491	5.3273e-05
	C24 H26 O11	490.147	16.191	2.90005e+07	1.52812e+07	2.05716e+07	2.24709e+07	1.62486e+07	2.05642e+07	2.03955e+07	1.24232e+06	1.48601e+06	1.82621e+06	2.36058e+07	2.51229e+07	2.90005e+07	19.1642	12.8181	19.3173	10.7377	1.74877e+07	2.19076e+07	2.49145e+07	1.92243e+07	2.39801e+07	2.31447e+07	2.16196e+06	2.56678e+06	3.00382e+06	2.49782e+07	2.51229e+07	3.05137e+07	2.14366e+07	2.21164e+07	2.57752e+06	2.68716e+07	3.73572e+06	2.53922e+06	421032	3.155e+06	0.797742	0.823039	0.0959199	-0.326005	-0.280967	-3.38203	0.126514	0.111741	0.00018917
		170.142	15.034	4.52837e+06	2.5623e+06	2.50501e+06	2.94139e+06	3.22825e+06	3.49093e+06	3.34235e+06	4.25656e+06	4.25132e+06	4.52837e+06	3.53533e+06	4.07021e+06	3.14562e+06	8.88321	3.92738	3.64665	12.9527	2.93228e+06	2.66769e+06	3.26125e+06	3.81944e+06	4.07081e+06	3.79289e+06	7.40754e+06	7.34332e+06	7.44844e+06	3.74087e+06	4.07021e+06	3.30976e+06	2.95374e+06	3.89438e+06	7.39977e+06	3.70695e+06	297361	153369	52990.2	381358	0.796812	1.05056	1.99619	-0.327688	0.0711631	0.997249	0.0542217	0.473821	7.69126e-05
		431.978	13.196	4.74442e+06	985.295	1237.01	652.549	380300	116941	229923	4.74442e+06	3.39093e+06	3.47145e+06	1829.85	1342.24	664.498	30.5927	54.5082	19.6247	45.7637	1127.57	1317.35	723.51	449945	136366	260916	8.25655e+06	5.85715e+06	5.70998e+06	1936.23	1342.24	699.171	1056.14	282409	6.60789e+06	1325.88	303.293	157891	1.42967e+06	618.692	0.796559	212.997	4983.78	-0.328147	7.73469	12.283	0.534936	0.0368082	0.00132146
		209.103	13.621	1.37379e+06	567718	1.02493e+06	992534	475973	831377	912996	671948	1.10241e+06	1.17009e+06	764170	1.32269e+06	1.37379e+06	29.6072	31.3959	27.5289	29.3165	649694	1.09149e+06	1.10047e+06	563138	969477	1.03606e+06	1.16937e+06	1.90419e+06	1.92461e+06	808597	1.32269e+06	1.44547e+06	947217	856227	1.66605e+06	1.19225e+06	257702	255996	430265	337881	0.794476	0.718158	1.3974	-0.331925	-0.477628	0.482743	0.37443	0.241698	0.207986
		290.076	14.436	900389	300767	788179	749189	417470	735989	704911	264789	378992	395570	661685	897722	900389	44.2058	28.3497	20.5528	16.7151	344197	839367	830659	493922	858245	799929	460802	654634	650650	700153	897722	947370	671408	717365	588695	848415	283406	195692	110777	130776	0.791367	0.845536	0.693877	-0.337582	-0.242062	-0.527249	0.381586	0.389465	0.0585083
	C12 H12 O5	236.068	13.657	888086	279824	332544	350141	269891	888086	382709	384956	349615	393931	495455	340777	460945	11.4049	64.1044	6.22824	18.7782	320229	354141	388217	319317	1.03561e+06	434297	669925	603891	647953	524259	340777	484996	354196	596407	640590	450011	33993.9	384678	33627.2	96614.6	0.787083	1.32532	1.4235	-0.345413	0.406336	0.509441	0.180473	0.5574	0.032075
		203.943	1.017	2.86793e+06	16958.9	1.75821e+06	2.86793e+06	1.48352e+06	2.09796e+06	2.11224e+06	1.91312e+06	1.62047e+06	1.60885e+06	2.3381e+06	1.50215e+06	2.36084e+06	92.8537	18.9126	10.0585	23.6731	19407.6	1.8724e+06	3.1798e+06	1.75519e+06	2.44646e+06	2.39696e+06	3.32934e+06	2.79904e+06	2.64629e+06	2.47403e+06	1.50215e+06	2.48403e+06	1.69054e+06	2.19954e+06	2.92489e+06	2.1534e+06	1.58803e+06	385607	358491	564020	0.785053	1.02142	1.35827	-0.349138	0.030582	0.441766	0.659082	0.912533	0.116187
	C8 H6 O2	134.037	15.334	2.87312e+06	1.67613e+06	1.96871e+06	2.10915e+06	1.85089e+06	2.19299e+06	2.55401e+06	23624.3	32851.4	23526.3	2.39039e+06	2.87312e+06	2.62127e+06	11.5184	15.987	20.0837	9.18627	1.91815e+06	2.09657e+06	2.33851e+06	2.18985e+06	2.55726e+06	2.89828e+06	41112.6	56744.3	38696.9	2.52936e+06	2.87312e+06	2.75805e+06	2.11774e+06	2.54846e+06	45517.9	2.72018e+06	210978	354296	9797.05	174978	0.778532	0.936875	0.0167335	-0.361171	-0.0940716	-5.90112	0.0189918	0.493526	1.21719e-05
	C25 H28 O13	536.153	16.192	4.20813e+06	2.31741e+06	3.07967e+06	3.21967e+06	2.58924e+06	3.13118e+06	3.37228e+06	195901	201408	176371	3.56518e+06	4.20813e+06	4.20027e+06	16.9058	13.2316	6.88025	9.24429	2.65203e+06	3.27968e+06	3.56979e+06	3.06341e+06	3.6513e+06	3.82685e+06	340919	347893	290102	3.77246e+06	4.20813e+06	4.41944e+06	3.16717e+06	3.51385e+06	326305	4.13334e+06	469110	399848	31545.7	329910	0.766248	0.850123	0.0789445	-0.384116	-0.234256	-3.66302	0.043331	0.107244	3.76505e-05
	C20 H18 O9	402.095	14.1	2.28329e+06	1.1662e+06	1.70867e+06	1.76224e+06	1.27196e+06	1.68126e+06	1.74742e+06	9285.27	6762.62	12341.4	1.9638e+06	2.25133e+06	2.28329e+06	21.3334	16.4368	29.5215	8.12325	1.33459e+06	1.81964e+06	1.95387e+06	1.50489e+06	1.96054e+06	1.98297e+06	16158.8	11681.1	20299.7	2.07797e+06	2.25133e+06	2.40243e+06	1.7027e+06	1.81613e+06	16046.5	2.24391e+06	325781	269775	4310.4	162359	0.758809	0.80936	0.00715114	-0.398192	-0.305146	-7.12761	0.0616316	0.0782414	1.86104e-05
		199.157	15.594	1.58369e+06	1.02402e+06	1.10698e+06	1.09427e+06	1.06203e+06	1.07672e+06	1.14896e+06	1.114e+06	1.12282e+06	1.12084e+06	1.5414e+06	1.51894e+06	1.58369e+06	4.15591	4.24589	0.413388	2.12368	1.17188e+06	1.17887e+06	1.21326e+06	1.25652e+06	1.25557e+06	1.30383e+06	1.93866e+06	1.93945e+06	1.8436e+06	1.63101e+06	1.51894e+06	1.66632e+06	1.18801e+06	1.27197e+06	1.90724e+06	1.60543e+06	22151.8	27592.6	55110	76950	0.739994	0.792296	1.18799	-0.434415	-0.335888	0.248527	0.000833474	0.00211729	0.00524836
		141.943	1.019	3.16829e+06	16812.4	3.16829e+06	2.11235e+06	1.51784e+06	2.27453e+06	2.3558e+06	2.1865e+06	2.84201e+06	2.89339e+06	2.24099e+06	2.74029e+06	2.53963e+06	90.8397	22.5493	14.9255	10.0219	19240	3.37405e+06	2.34206e+06	1.79581e+06	2.65235e+06	2.67335e+06	3.80509e+06	4.90901e+06	4.75916e+06	2.37127e+06	2.74029e+06	2.67214e+06	1.91178e+06	2.37384e+06	4.49109e+06	2.59457e+06	1.7183e+06	500699	598799	196356	0.736841	0.914927	1.73096	-0.440574	-0.128272	0.79157	0.53166	0.516429	0.00645985
		122.036	13.194	3.22932e+07	75481.8	75102.6	83760.9	2.43851e+06	2.21054e+06	2.06323e+06	2.58584e+07	2.41721e+07	3.22932e+07	97071.8	130687	113554	6.2639	8.45098	15.6179	14.7742	86381	79980	92869.5	2.88508e+06	2.57773e+06	2.34134e+06	4.50004e+07	4.17524e+07	5.31172e+07	102715	130687	119479	86410.2	2.60138e+06	4.66233e+07	117627	6444.77	272644	5.85364e+06	14077.5	0.734611	22.1155	396.366	-0.444947	4.46699	8.63069	0.0250715	9.47535e-05	0.000161605
		214.971	12.91	880328	449393	593003	447958	438027	433836	423353	93328.7	85923.1	97266.2	880328	646042	642877	16.7739	1.75067	6.24831	18.8344	514283	631514	496671	518244	505900	480419	162417	148415	159987	931508	646042	676422	547490	501521	156940	751324	73298.4	19288.7	7481.72	156782	0.7287	0.667517	0.208884	-0.456604	-0.583125	-2.25922	0.110952	0.0519562	0.00279464
	C12 H14 O7	270.074	14.449	1.94838e+06	1.04036e+06	1.40536e+06	1.4511e+06	1.1145e+06	1.45223e+06	1.47405e+06	53397.5	53641.6	53337.3	1.81126e+06	1.93292e+06	1.94838e+06	17.3294	14.9658	0.301448	3.95808	1.19059e+06	1.49663e+06	1.6089e+06	1.3186e+06	1.69346e+06	1.67274e+06	92925.7	92655.3	87731.3	1.91656e+06	1.93292e+06	2.05004e+06	1.43204e+06	1.5616e+06	91104.1	1.96651e+06	216507	210696	2924	72805.2	0.728214	0.794099	0.0463278	-0.457566	-0.33261	-4.43198	0.0154407	0.0346452	1.51399e-06
		310.182	17.351	1.02929e+07	411408	2.13079e+06	3.30177e+06	1.02929e+07	2.2794e+06	2.60142e+06	4.99463e+06	2.01356e+06	3.01647e+06	3.34131e+06	2.18953e+06	2.96395e+06	74.6321	89.6912	45.3947	20.737	470813	2.26917e+06	3.66082e+06	1.21778e+07	2.65803e+06	2.95208e+06	8.69197e+06	3.47803e+06	4.96161e+06	3.53557e+06	2.18953e+06	3.11861e+06	2.1336e+06	5.92932e+06	5.71053e+06	2.9479e+06	1.59932e+06	5.41338e+06	2.68644e+06	689066	0.72377	2.01137	1.93715	-0.466397	1.00818	0.953936	0.463423	0.397584	0.159553
		266.164	15.948	3.0858e+06	426052	2.42387e+06	2.08448e+06	2.39606e+06	2.49435e+06	2.03613e+06	2.83173e+06	2.55391e+06	2.17639e+06	3.0858e+06	2.41745e+06	1.74325e+06	64.994	10.4484	13.0494	27.7906	487572	2.58129e+06	2.31115e+06	2.83486e+06	2.90869e+06	2.3106e+06	4.92796e+06	4.41138e+06	3.57981e+06	3.2652e+06	2.41745e+06	1.83421e+06	1.79334e+06	2.68471e+06	4.30638e+06	2.50562e+06	1.13886e+06	326093	680178	719562	0.715726	1.07148	1.71869	-0.48252	0.0996012	0.78131	0.411588	0.714598	0.0345134
		288.987	14.451	997999	600682	557104	448761	71907.8	62162.3	50239.2	10551.9	5925.21	4240.86	997999	764420	670672	14.6079	17.6646	47.319	20.7844	687418	593285	497562	85076.3	72488.1	57011.2	18363.1	10234.6	6975.54	1.05602e+06	764420	705667	592755	71525.2	11857.8	842036	94928.9	14057.3	5864.74	187630	0.703954	0.0849432	0.0140823	-0.506446	-3.55736	-6.14998	0.109278	0.00208643	0.00156128
		383.1	15.508	2.38502e+06	6438.65	5894.39	5178.55	2.38502e+06	2.37243e+06	2.37663e+06	4212.35	3070.39	3118.32	6694.9	6118.4	13686.5	10.827	0.269547	18.6305	47.6935	7368.36	6277.2	5741.7	2.82179e+06	2.76652e+06	2.69699e+06	7330.61	5303.49	5129.13	7084.13	6118.4	14400.6	6462.42	2.76177e+06	5921.08	9201.05	828.997	62538.2	1223.8	4528.78	0.702356	300.158	0.643522	-0.509725	8.22958	-0.635939	0.361096	1.793e-07	0.292549
		397.234	16.078	3.69081e+07	29322	2.71431e+07	2.71255e+07	3.69081e+07	2.86703e+07	3.18209e+07	2.39608e+07	2.45689e+07	1.96509e+07	3.19846e+07	2.94189e+07	1.99181e+07	86.4623	12.803	11.7972	23.4504	33555.9	2.89059e+07	3.00752e+07	4.36671e+07	3.34327e+07	3.61102e+07	4.16981e+07	4.24379e+07	3.23227e+07	3.38441e+07	2.94189e+07	2.09574e+07	1.96716e+07	3.77367e+07	3.88196e+07	2.80734e+07	1.70171e+07	5.30753e+06	5.63862e+06	6.54787e+06	0.700717	1.34421	1.38279	-0.513095	0.426761	0.467577	0.469498	0.118027	0.0975445
	C24 H30 O8	446.194	17.611	1.09547e+06	560731	703913	727407	569459	655379	712559	701826	767319	797455	923101	1.01143e+06	1.09547e+06	13.5865	11.1535	6.47112	8.53376	641697	749628	806509	673745	764244	808608	1.22136e+06	1.32539e+06	1.31169e+06	976768	1.01143e+06	1.15263e+06	732611	748866	1.28615e+06	1.04694e+06	83713.4	68734.1	56521.7	93151.2	0.699763	0.715289	1.22848	-0.515061	-0.483403	0.296874	0.0121844	0.0111624	0.0190623
		178.056	13.692	1.61899e+06	845097	1.00515e+06	1.00561e+06	957684	968663	1.13918e+06	1.10959e+06	1.09978e+06	1.00673e+06	1.36948e+06	1.39088e+06	1.61899e+06	9.72108	9.95914	5.29521	9.47337	967124	1.07043e+06	1.11497e+06	1.13307e+06	1.12957e+06	1.29274e+06	1.93098e+06	1.89966e+06	1.65591e+06	1.4491e+06	1.39088e+06	1.70346e+06	1.05084e+06	1.18512e+06	1.82885e+06	1.51448e+06	75842.9	93213.3	150585	166233	0.693861	0.782529	1.20758	-0.527281	-0.353784	0.272114	0.0117364	0.0402096	0.0721673
		210.173	16.992	943068	510641	561297	593467	246388	288642	270095	847106	935793	892067	824833	864549	943068	7.52173	7.89166	4.97331	6.85705	584375	597749	658004	291510	336588	306502	1.47419e+06	1.6164e+06	1.46731e+06	872787	864549	992276	613376	311533	1.5193e+06	909871	39223.4	22956.5	84161	71484.2	0.674135	0.342393	1.6698	-0.56889	-1.54628	0.739671	0.00324792	0.000159651	0.000668973
	C30 H22 O9	526.124	16.191	937114	214704	553683	668377	367698	645414	709917	21399.2	29185.3	30903.3	602332	739155	937114	49.2556	31.661	18.6456	22.1608	245707	589642	741060	435035	752623	805611	37240.3	50411.9	50831	637350	739155	986011	525469	664423	46161.1	787505	253835	200415	7728.47	179289	0.667258	0.843706	0.0586169	-0.583683	-0.245187	-4.09254	0.217955	0.472274	0.00201892
		220.067	16.098	524825	262386	264666	266477	280236	261600	283369	524825	492710	465090	417145	426313	429819	0.77509	4.27841	6.04914	1.54194	300273	281854	295455	331557	305055	321565	913333	851059	764999	441397	426313	452247	292527	319392	843130	439985	9552.04	13384.1	74484.1	13024.6	0.664857	0.725915	1.91627	-0.588885	-0.462127	0.9383	9.34598e-05	0.000363832	0.000764307
		302.129	17.118	984864	422595	606556	643754	240238	255350	343085	194797	205580	194238	795068	984864	959207	21.2357	19.8644	3.22536	11.2781	483615	645948	713759	284234	297766	389331	338998	355098	319491	841292	984864	1.00926e+06	614441	323777	337863	945138	118263	57173.3	17831	90756.4	0.650107	0.342571	0.357474	-0.621251	-1.54552	-1.48409	0.0184232	0.000554777	0.000340965
		198.173	16.743	497956	265732	277016	284886	236452	276887	229758	392242	443089	428967	429942	497956	449034	3.48973	10.294	6.22814	7.64315	304103	295007	315866	279754	322880	260728	682605	765349	705582	454938	497956	472464	304992	287787	717845	475119	10458	31845.4	42713.5	21631.6	0.641928	0.605717	1.51087	-0.639517	-0.723285	0.595384	0.000253866	0.00108517	0.000927601
	C8 H6 O	118.042	15.632	1.06342e+06	453241	576558	620696	897108	947916	980856	40632.4	44899.7	34647.4	860460	886058	1.06342e+06	15.7755	4.47902	12.856	11.8008	518687	614002	688193	1.0614e+06	1.10537e+06	1.11307e+06	70711.1	77555.4	56989.4	910486	886058	1.11891e+06	606961	1.09328e+06	68418.6	971816	84972.3	27879.2	10472.9	127967	0.624563	1.12499	0.0704028	-0.679081	0.169908	-3.82822	0.0146842	0.183472	0.000260219
		354.035	13.198	1.21937e+07	867.007	1588.49	2880.32	503921	698166	645771	8.46118e+06	1.21937e+07	1.17005e+07	1488.58	2748.96	4839.94	57.3501	16.3157	18.8004	55.9434	992.199	1691.65	3193.54	596205	814139	732817	1.47247e+07	2.10622e+07	1.92455e+07	1575.12	2748.96	5092.48	1959.13	714387	1.83441e+07	3138.85	1124.78	110130	3.2635e+06	1790.8	0.624155	227.595	5844.21	-0.680023	7.83032	12.5128	0.388642	0.000363809	0.000623729
		218.088	16.7	1.45507e+06	624989	798202	808193	869688	968732	966896	1.14227e+06	1.40514e+06	1.32842e+06	1.10687e+06	1.45507e+06	1.30878e+06	13.8492	6.05923	10.4629	13.5509	715235	850040	896080	1.02896e+06	1.12965e+06	1.09723e+06	1.98786e+06	2.4271e+06	2.18505e+06	1.17122e+06	1.45507e+06	1.37707e+06	820452	1.08528e+06	2.2e+06	1.33446e+06	93983.3	51399.1	220001	146645	0.614821	0.813274	1.64861	-0.701762	-0.298187	0.721253	0.00692757	0.0499497	0.0047718
		476.216	15.676	1.30096e+06	485105	609842	641094	241398	215916	244862	122450	139165	117852	832606	1.30096e+06	900974	14.262	6.75345	8.86725	25.011	555151	649447	710810	285605	251782	277868	213096	240380	193847	881012	1.30096e+06	947985	638469	271752	215775	1.04332e+06	78407.6	17721.9	23382	225624	0.611959	0.260468	0.206815	-0.708492	-1.94082	-2.27359	0.0425709	0.00411631	0.00320863
		413.208	16.07	1.64515e+06	28380.8	1.00342e+06	1.04317e+06	1.64515e+06	1.34563e+06	1.39886e+06	1.0749e+06	1.09122e+06	999433	1.53481e+06	1.28746e+06	850494	83.0987	10.9206	4.64043	28.3037	32478.8	1.06858e+06	1.15661e+06	1.94642e+06	1.56915e+06	1.58742e+06	1.8706e+06	1.88486e+06	1.64391e+06	1.62404e+06	1.28746e+06	894872	752557	1.701e+06	1.79979e+06	1.26879e+06	625157	212741	135187	364944	0.593129	1.34064	1.41851	-0.753583	0.422926	0.504373	0.284345	0.151059	0.0773903
		456.269	16.376	5.80633e+07	113758	1.16833e+07	1.71697e+07	42353	3.72699e+07	5.80633e+07	81402.1	4.32954e+06	1.09873e+07	95847	2.26051e+07	3.17561e+07	90.1746	92.4634	107.099	89.7572	130185	1.24421e+07	1.90368e+07	50109.1	4.34608e+07	6.58899e+07	141661	7.47843e+06	1.80724e+07	101419	2.26051e+07	3.34131e+07	1.05364e+07	3.64669e+07	8.56417e+06	1.87065e+07	9.5963e+06	3.34725e+07	9.01455e+06	1.69946e+07	0.563245	1.94942	0.457817	-0.828166	0.963046	-1.12716	0.50855	0.458545	0.412813
	C22 H42 O8	434.287	16.401	1.09584e+08	224372	2.09622e+07	2.88263e+07	132572	7.52568e+07	1.09584e+08	135087	1.26454e+07	1.95362e+07	300017	3.8649e+07	5.5303e+07	88.6329	90.7892	91.302	89.7771	256771	2.23235e+07	3.1961e+07	156850	8.77577e+07	1.24356e+08	235087	2.18425e+07	3.2134e+07	317459	3.8649e+07	5.81886e+07	1.81804e+07	7.07567e+07	1.80705e+07	3.2385e+07	1.62531e+07	6.38209e+07	1.62805e+07	2.94397e+07	0.561384	2.18486	0.55799	-0.83294	1.12754	-0.841688	0.504956	0.397887	0.50202
		572.15	15.391	648657	56146.7	328374	380134	101419	405603	459910	7499.8	13398.5	8786.87	303849	485474	648657	68.2846	59.947	31.3446	35.9851	64254	349700	421472	119992	472977	521903	13051.6	23143.3	14453	321515	485474	682504	278475	371624	16882.6	496497	188960	219289	5466.95	180747	0.56088	0.748491	0.0340035	-0.834236	-0.417942	-4.87817	0.222195	0.488997	0.0100769
		451.314	16.245	3.0078e+07	39944.9	8.54862e+06	8.54262e+06	50085.8	2.8809e+07	3.0078e+07	51066.3	7.05843e+06	5.90795e+06	54807	1.70409e+07	1.54065e+07	85.9968	86.4421	86.604	86.494	45712.8	9.1038e+06	9.47159e+06	59258.1	3.35945e+07	3.41324e+07	88868.9	1.2192e+07	9.71763e+06	57993.4	1.70409e+07	1.62104e+07	6.20703e+06	2.25954e+07	7.33285e+06	1.11031e+07	5.33903e+06	1.95187e+07	6.3943e+06	9.57435e+06	0.559036	2.03505	0.660433	-0.838987	1.02507	-0.598517	0.482357	0.411688	0.600899
	C20 H16 O8	384.084	16.411	6.39189e+06	2.14825e+06	2.85162e+06	3.26053e+06	1.72089e+06	2.22937e+06	2.16139e+06	711438	1.01529e+06	891925	6.39189e+06	4.62022e+06	4.74432e+06	20.4325	13.5502	17.5071	18.8304	2.45844e+06	3.03682e+06	3.6151e+06	2.03604e+06	2.59969e+06	2.45274e+06	1.23809e+06	1.75371e+06	1.46707e+06	6.7635e+06	4.62022e+06	4.99187e+06	3.03678e+06	2.36282e+06	1.48629e+06	5.45853e+06	578327	292385	258346	1.14531e+06	0.556337	0.432868	0.272288	-0.845968	-1.208	-1.8768	0.0308112	0.010528	0.00423286
		456.269	16.142	4.31292e+07	67712.6	1.33019e+07	1.42668e+07	106049	4.27985e+07	4.31292e+07	138539	8.70479e+06	9.31286e+06	85238.5	3.42099e+07	1.95434e+07	86.1254	86.2842	84.7691	95.3869	77489.9	1.41658e+07	1.58183e+07	125470	4.99078e+07	4.89428e+07	241094	1.50358e+07	1.53182e+07	90194.1	3.42099e+07	2.05632e+07	1.00205e+07	3.2992e+07	1.01984e+07	1.82877e+07	8.65045e+06	2.84674e+07	8.6244e+06	1.71733e+07	0.547935	1.80405	0.557661	-0.867922	0.85124	-0.842541	0.497841	0.486349	0.506338
		212.152	14.903	811710	237374	232854	291087	294976	417281	318238	741344	799413	811710	518691	508169	468660	12.7653	18.9077	4.79272	5.29148	271650	247977	322741	348996	486596	361135	1.29013e+06	1.38083e+06	1.33513e+06	548847	508169	493114	280789	398909	1.33537e+06	516710	38211.1	76181.3	45347.7	28831.6	0.543417	0.772017	2.58436	-0.879867	-0.373295	1.36981	0.00103348	0.0664166	1.22589e-05
		231.997	0.093	4.27615e+06	21318.7	2.54921e+06	2.42421e+06	4.14426e+06	293700	2.60614e+06	320131	2.91464e+06	2.24081e+06	4.27615e+06	3.03184e+06	2.42426e+06	85.576	82.5462	73.76	29.0995	24397.1	2.71476e+06	2.68783e+06	4.9032e+06	342486	2.95743e+06	557112	5.03446e+06	3.68577e+06	4.52476e+06	3.03184e+06	2.55076e+06	1.809e+06	2.73437e+06	3.09245e+06	3.36912e+06	1.54557e+06	2.28852e+06	2.29689e+06	1.02931e+06	0.536935	0.811599	0.917881	-0.897181	-0.301161	-0.12362	0.219314	0.683916	0.858277
	C22 H42 O8	434.287	16.212	1.29886e+07	69680.7	2.971e+06	3.18732e+06	67658	1.29886e+07	1.28569e+07	75014.1	2.13423e+06	2.09722e+06	77487.1	6.24296e+06	6.44774e+06	83.8577	85.9276	82.0871	85.0599	79742.2	3.16395e+06	3.53392e+06	80048.3	1.51462e+07	1.459e+07	130544	3.68646e+06	3.44959e+06	81992.1	6.24296e+06	6.78418e+06	2.2592e+06	9.93874e+06	2.4222e+06	4.36971e+06	1.89651e+06	8.5424e+06	1.98816e+06	3.72312e+06	0.517014	2.27446	0.554315	-0.951724	1.18552	-0.851221	0.43103	0.359083	0.468941
		275.007	17.359	1.62971e+07	6.67391e+06	7.44024e+06	8.03975e+06	5.43307e+06	6.18793e+06	6.44835e+06	2.34397e+06	2.461e+06	2.5552e+06	1.52704e+07	1.50633e+07	1.62971e+07	9.2708	8.75501	4.31313	4.25068	7.63759e+06	7.92344e+06	8.91404e+06	6.42803e+06	7.2158e+06	7.31756e+06	4.07913e+06	4.25088e+06	4.20289e+06	1.61582e+07	1.50633e+07	1.71475e+07	8.15836e+06	6.98713e+06	4.17763e+06	1.6123e+07	669863	486858	88620.3	1.04253e+06	0.506008	0.433365	0.25911	-0.982769	-1.20635	-1.94836	0.000370501	0.000161984	3.85797e-05
		375.252	16.119	1.70799e+08	204074	8.92131e+07	9.31093e+07	1.703e+08	1.62107e+08	1.70799e+08	8.08696e+07	8.05421e+07	7.49067e+07	1.37147e+08	1.26773e+08	1.36405e+08	86.3714	2.90945	4.25547	4.33689	233541	9.50069e+07	1.03235e+08	2.01487e+08	1.89035e+08	1.93821e+08	1.40734e+08	1.39121e+08	1.2321e+08	1.45121e+08	1.26773e+08	1.43523e+08	6.61583e+07	1.94781e+08	1.34355e+08	1.38472e+08	5.72406e+07	6.28109e+06	9.68579e+06	1.01632e+07	0.477773	1.40664	0.970265	-1.0656	0.492256	-0.0435488	0.0974923	0.00122592	0.638204
		223.012	18.059	790158	297518	336787	336575	288843	300588	301064	106060	112880	117940	679481	727211	790158	6.98677	2.33215	5.30906	7.58072	340478	358659	373176	341739	350519	341646	184573	194978	193993	718985	727211	831387	357438	344635	191181	759194	16383.2	5095.71	5744.44	62656.1	0.470812	0.453948	0.251821	-1.08678	-1.1394	-1.98953	0.00042529	0.000335174	9.76901e-05
		420.309	16.153	1.76929e+06	19677	611326	794531	1.02273e+06	1.11542e+06	1.76929e+06	512986	499758	947923	762059	981713	1.527e+06	85.2252	31.2416	39.0197	36.1247	22518.2	651027	880932	1.21002e+06	1.30071e+06	2.00778e+06	892731	863233	1.55918e+06	806364	981713	1.60668e+06	518159	1.50617e+06	1.10505e+06	1.13158e+06	444364	436766	393568	420679	0.457906	1.33103	0.97655	-1.12688	0.412539	-0.0342335	0.157509	0.34493	0.940243
		447.117	15.506	1.24832e+06	2421.64	1808.85	1549.36	908537	1.21492e+06	1.24832e+06	2105.84	1583.01	1461.77	4175.11	5705.03	4598.68	23.2485	16.6628	19.9356	16.3676	2771.32	1926.33	1717.84	1.07492e+06	1.41673e+06	1.41659e+06	3664.73	2734.34	2404.38	4417.85	5705.03	4838.63	2138.49	1.30275e+06	2934.48	4987.17	557.866	197303	653.577	656.324	0.428799	261.219	0.588406	-1.22163	8.02912	-0.765117	0.00459887	0.000338607	0.0184834
	C12 H12 O5	236.068	16.42	1.78107e+07	3.82826e+06	5.87931e+06	7.14686e+06	4.10666e+06	5.15713e+06	5.0968e+06	1.64582e+06	2.3023e+06	1.97372e+06	1.78107e+07	1.18599e+07	1.21486e+07	29.8078	12.3222	16.6287	24.0713	4.38104e+06	6.26114e+06	7.92405e+06	4.85871e+06	6.01378e+06	5.78382e+06	2.86416e+06	3.97678e+06	3.24646e+06	1.88462e+07	1.18599e+07	1.27825e+07	6.18874e+06	5.55211e+06	3.36247e+06	1.44962e+07	1.77261e+06	611404	565306	3.79535e+06	0.426921	0.383004	0.231955	-1.22796	-1.38457	-2.10808	0.0264137	0.0157363	0.00735639
		255.887	1.025	741071	287380	275952	266268	460339	443496	486438	269491	260373	267705	682575	741071	734575	3.82151	4.66881	1.81754	4.45679	328876	293873	295224	544642	517165	552007	468985	449743	440332	722258	741071	772904	305991	537938	453020	745411	19830.5	18363	14605.3	25600.6	0.4105	0.721667	0.607745	-1.28455	-0.470596	-0.718462	1.94275e-05	0.00033703	6.73059e-05
		278.903	1.033	1.25327e+06	437086	390567	402170	700384	612864	798484	392874	399048	377997	996226	1.25327e+06	973701	5.9066	13.192	2.77494	14.4561	500199	415931	445904	828647	714667	906116	683704	689277	621744	1.05414e+06	1.25327e+06	1.02451e+06	454011	816476	664908	1.11064e+06	42714.7	96302.9	37485.1	124407	0.408783	0.73514	0.598671	-1.29059	-0.44391	-0.740165	0.00098408	0.0317171	0.00402353
		329.887	1.016	687463	203720	192210	207237	350777	329145	340468	198559	184907	170470	483424	687463	532316	3.90932	3.18107	7.60727	18.7642	233136	204692	229773	415015	383819	386362	345545	319390	280395	511530	687463	560092	222534	395065	315110	586362	15542.2	17323.5	32784.9	90861.1	0.379516	0.673757	0.537399	-1.39777	-0.5697	-0.895935	0.00239519	0.0231246	0.0082564
		490.147	16.444	7.13995e+06	1.35217e+06	2.43814e+06	3.28597e+06	2.4929e+06	3.45961e+06	4.29969e+06	249572	486437	432792	7.13995e+06	6.22013e+06	6.45302e+06	41.0954	26.4569	31.8785	7.24103	1.54742e+06	2.59648e+06	3.64331e+06	2.94942e+06	4.03429e+06	4.87927e+06	434322	840224	711873	7.55505e+06	6.22013e+06	6.78973e+06	2.59573e+06	3.95433e+06	662140	6.85497e+06	1.04795e+06	967406	207471	669849	0.378665	0.576856	0.0965926	-1.40101	-0.793717	-3.37194	0.00404931	0.0129533	0.00010655
		127.507	0.084	991418	9802.4	84919.3	630215	210722	960983	609378	991418	768155	530058	714555	744038	601838	140.123	63.2272	30.2301	10.9274	11217.8	90434.2	698748	249312	1.12061e+06	691519	1.72533e+06	1.32684e+06	871861	756098	744038	633241	266800	687148	1.30801e+06	711125	376169	435666	427045	67719	0.37518	0.966282	1.83935	-1.41435	-0.0494836	0.879196	0.114341	0.929484	0.0750844
	C22 H22 O10	446.121	16.422	2.62615e+08	5.13987e+07	6.78361e+07	8.23796e+07	4.12769e+07	4.8934e+07	5.19712e+07	2.60601e+07	3.62199e+07	3.63345e+07	2.62615e+08	1.64247e+08	1.83276e+08	23.064	11.6279	17.9461	25.6537	5.88204e+07	7.22416e+07	9.1338e+07	4.8836e+07	5.70624e+07	5.89767e+07	4.53514e+07	6.25627e+07	5.97645e+07	2.77883e+08	1.64247e+08	1.9284e+08	7.41333e+07	5.49584e+07	5.58929e+07	2.11657e+08	1.63412e+07	5.38779e+06	9.23577e+06	5.91087e+07	0.350253	0.259658	0.264073	-1.51353	-1.94531	-1.92099	0.017779	0.0102395	0.0107434
		512.129	16.446	5.03006e+06	506702	1.58481e+06	2.31767e+06	828344	2.13471e+06	2.71224e+06	81897.5	304833	272686	4.34457e+06	4.56968e+06	5.03006e+06	61.9811	51.019	54.8251	7.51722	579867	1.68773e+06	2.56971e+06	980040	2.4893e+06	3.07784e+06	142523	526538	448525	4.59715e+06	4.56968e+06	5.29252e+06	1.61243e+06	2.1824e+06	372529	4.81978e+06	997055	1.08205e+06	202974	409632	0.334545	0.452799	0.0772916	-1.57973	-1.14306	-3.69355	0.00672721	0.0168429	7.27262e-05
	C23 H24 O12	492.127	16.425	5.98344e+07	1.1654e+07	1.55752e+07	1.72644e+07	1.04096e+07	1.26371e+07	1.27013e+07	7.44482e+06	9.81328e+06	9.90596e+06	5.98344e+07	3.89343e+07	4.53812e+07	19.4067	10.9512	15.4059	22.2739	1.33368e+07	1.65867e+07	1.91418e+07	1.2316e+07	1.47362e+07	1.44134e+07	1.2956e+07	1.69505e+07	1.62937e+07	6.3313e+07	3.89343e+07	4.77491e+07	1.63551e+07	1.38219e+07	1.54001e+07	4.99988e+07	2.90944e+06	1.31409e+06	2.14198e+06	1.23441e+07	0.32711	0.276444	0.308009	-1.61215	-1.85494	-1.69896	0.0100704	0.00724324	0.00875494
		482.098	16.425	7.12511e+06	988022	2.28119e+06	2.81466e+06	931469	2.02823e+06	2.08983e+06	818178	1.42205e+06	1.51226e+06	7.12511e+06	5.92184e+06	6.92572e+06	46.3166	38.72	30.1714	9.68678	1.13069e+06	2.42934e+06	3.12074e+06	1.10205e+06	2.36514e+06	2.37153e+06	1.42385e+06	2.45631e+06	2.48743e+06	7.53935e+06	5.92184e+06	7.28709e+06	2.22692e+06	1.94624e+06	2.12253e+06	6.91609e+06	1.01035e+06	731096	605277	870239	0.321992	0.281407	0.306897	-1.6349	-1.82927	-1.70417	0.0036743	0.00162958	0.00143475
		177.939	0.083	1.36749e+06	9008.68	88548.2	773745	1.08294e+06	1.00277e+06	645672	1.18875e+06	828059	534365	1.36749e+06	939700	592533	144.764	25.5685	38.5426	40.1602	10309.5	94298.8	857886	1.28127e+06	1.16934e+06	732706	2.06873e+06	1.43031e+06	878944	1.447e+06	939700	623451	320831	1.0611e+06	1.45933e+06	1.00338e+06	466995	289854	595425	415450	0.31975	1.05753	1.45441	-1.64498	0.080692	0.540433	0.131538	0.853174	0.337873
		108.013	1.022	1.78979e+06	17213.9	713659	766594	1.0809e+06	1.2258e+06	1.21478e+06	540556	657834	534866	1.66624e+06	1.78979e+06	1.7321e+06	83.7839	6.87201	12.014	3.5747	19699.5	760007	849957	1.27885e+06	1.42942e+06	1.37853e+06	940710	1.13628e+06	879770	1.76311e+06	1.78979e+06	1.82248e+06	543221	1.36227e+06	985586	1.79179e+06	455608	76592.1	134013	29732.2	0.303172	0.760281	0.550056	-1.72179	-0.395396	-0.86235	0.00906039	0.000824302	0.000525986
		96.5048	1.018	1.39622e+06	96090.3	499372	508096	1.05246e+06	1.07684e+06	1.07218e+06	411928	625505	433900	1.32375e+06	1.32583e+06	1.39622e+06	63.9913	1.21275	23.954	3.05906	109965	531803	563349	1.2452e+06	1.25572e+06	1.21671e+06	716863	1.08044e+06	713696	1.40071e+06	1.32583e+06	1.46908e+06	401706	1.23921e+06	836998	1.39854e+06	253146	20185.6	210829	71646.7	0.287232	0.886073	0.59848	-1.79971	-0.174502	-0.740625	0.00278888	0.0206995	0.0119871
		179.977	1.018	1.33451e+06	31200.4	504040	492481	667474	999505	987380	352491	469740	430358	1.25098e+06	1.33451e+06	1.3249e+06	78.7332	21.2814	14.2908	3.50657	35705.5	536774	546036	789710	1.16553e+06	1.12047e+06	613427	811383	707871	1.3237e+06	1.33451e+06	1.39403e+06	372838	1.02524e+06	710894	1.35075e+06	292002	205214	99012.9	37873.4	0.276024	0.759016	0.526296	-1.85714	-0.397798	-0.926053	0.00452849	0.0539972	0.000473067
		105.51	1.018	794478	15491	249383	303091	307072	560793	482513	201607	281670	240883	667860	751236	794478	80.7716	28.864	16.585	8.72261	17727.9	265579	336051	363306	653947	547554	350849	486529	396214	706688	751236	835933	206453	521602	411197	764619	167196	147048	69070.1	65653.7	0.270007	0.682173	0.537781	-1.88893	-0.551791	-0.89491	0.00576016	0.0591856	0.00301935
		117.018	1.018	967081	15850.3	297122	310030	428357	542943	643572	252992	295694	281882	792448	967081	785895	80.0529	20.0046	7.87062	12.1121	18139	316418	343744	506803	633131	730323	440273	510754	463651	838519	967081	826902	226100	623419	471559	877501	180617	112076	35899.7	77795.7	0.257664	0.710448	0.537389	-1.95644	-0.493198	-0.895961	0.00457255	0.0321065	0.00120156
		216.025	1.018	1.89414e+06	17213.9	628237	654782	778086	1.32595e+06	1.30411e+06	540556	664628	507343	1.66624e+06	1.89414e+06	1.86507e+06	83.2193	27.3049	14.5226	6.85881	19699.5	669037	725987	920578	1.5462e+06	1.4799e+06	940710	1.14801e+06	834498	1.76311e+06	1.89414e+06	1.96239e+06	471575	1.31556e+06	974407	1.87321e+06	392370	343666	159451	101273	0.251746	0.702301	0.520179	-1.98996	-0.509839	-0.942919	0.00390404	0.0543237	0.00118208
		930.188	16.424	956485	104387	143691	234034	40633.3	130305	109008	40208.9	95878.1	65395.6	956485	597868	792710	41.366	50.2064	41.5071	22.9478	119459	153023	259484	48074.6	151950	123702	69974.1	165610	107565	1.01209e+06	597868	834072	177322	107909	114383	814678	73106.3	53708.5	48181.3	207793	0.217659	0.132456	0.140403	-2.19986	-2.91641	-2.83235	0.00742956	0.00467041	0.00472247
		473.08	16.429	2.38643e+06	215762	259793	265886	139921	195072	135757	121790	145434	109823	2.38643e+06	1.066e+06	923658	11.0664	21.0998	14.4189	55.2952	246917	276665	294800	165545	227476	154056	211946	251208	180641	2.52517e+06	1.066e+06	971853	272794	182359	214598	1.52101e+06	24175	39492.2	35358.5	870904	0.179351	0.119894	0.14109	-2.47914	-3.06017	-2.82531	0.0681028	0.056416	0.0602989
		267.096	1.876	1.95098e+06	39937.1	34586.8	33646.4	12129	14958.5	10513.5	495945	515917	576237	1.58997e+06	1.85479e+06	1.95098e+06	9.41083	17.9514	7.89653	10.3945	45703.9	36833	37305.2	14350.2	17443.3	11930.7	863075	891146	947818	1.68241e+06	1.85479e+06	2.05278e+06	39947.4	14574.7	900679	1.86332e+06	4990.87	2763.15	43168.7	185334	0.0214388	0.00782189	0.483373	-5.54363	-6.99827	-1.04879	6.96527e-05	6.58822e-05	0.000935301
		166.986	16.046	2.85367e+08	2.21936e+08	2.6369e+08	2.66713e+08	1.25349e+08	1.37676e+08	1.4429e+08	2.75477e+08	2.85367e+08	2.81882e+08	2.11008e+08	2.26593e+08	2.49548e+08	9.97898	7.08024	1.78584	8.46404	2.53982e+08	2.80815e+08	2.95716e+08	1.48304e+08	1.60545e+08	1.63739e+08	4.79402e+08	4.92916e+08	4.63651e+08	2.23276e+08	2.26593e+08	2.62569e+08	2.76838e+08	1.57529e+08	4.78656e+08	2.37479e+08	2.11496e+07	8.14745e+06	1.46463e+07	2.17915e+07	1.16573	0.663339	2.01557	0.221239	-0.592181	1.01119	0.0881436	0.00399788	9.12289e-05

## Sheet: TPA
Table S8C. All metabolomics results obtained for incubations of Thioclava sp. BHET1, Bacillus sp. BHET2 and Ideonella sakaiensis with TPA, including compounds detected, predicted formula of compounds and peak area in each sample.
Name	Predicted Formula	Molecular Weight	RT [min]	Area (Max.)	Area: thio_tpa_R1	Area: thio_tpa_R2	Area: thio_tpa_R3	Area: baci_tpa_R1	Area: baci_tpa_R2	Area: baci_tpa_R3	Area: ideo_tpa_R1	Area: ideo_tpa_R2	Area: ideo_tpa_R3	Area: none_tpa_R1	Area: none_tpa_R2	Area: none_tpa_R3	Group CV [%]: thioclava_tpa	Group CV [%]: bacillus_tpa	Group CV [%]: ideonella_tpa	Group CV [%]: none_tpa	Norm. Area: thio_tpa_R1	Norm. Area: thio_tpa_R2	Norm. Area: thio_tpa_R3	Norm. Area: baci_tpa_R1	Norm. Area: baci_tpa_R2	Norm. Area: baci_tpa_R3	Norm. Area: ideo_tpa_R1	Norm. Area: ideo_tpa_R2	Norm. Area: ideo_tpa_R3	Norm. Area: none_tpa_R1	Norm. Area: none_tpa_R2	Norm. Area: none_tpa_R3	Avg. Norm. Area: thioclava_tpa	Avg. Norm. Area: bacillus_tpa	Avg. Norm. Area: ideonella_tpa	Avg. Norm. Area: none_tpa	SD Norm. Area: thioclava_tpa	SD Norm. Area: bacillus_tpa	SD Norm. Area: ideonella_tpa	SD Norm. Area: none_tpa	Ratio Avg. Norm. Area: thioclava_tpa/none	Ratio Avg. Norm. Area: bacillus_tpa/none	Ratio Avg. Norm. Area: idionella_tpa/none	Log2 Fold Change: thioclava_tpa/none	Log2 Fold Change: bacillus_tpa/none	Log2 Fold Change: idionella_tpa/none	P-value: thioclava_tpa/none	P-value: bacillus_tpa/none	P-value: idionella_tpa/none
		995.589	13.386	986827	960822	986827	949069	808166	878494	964928	938406	956255	986521	838027	805966	869185	2	8.88	2.53	3.77	1.05812e+06	1.0683e+06	967026	898909	1.01098e+06	1.02799e+06	1.00164e+06	1.02467e+06	997626	925431	845454	869185	1.03115e+06	979293	1.00798e+06	880023	55765	70131.7	14596.7	41075.4	1.17173	1.1128	1.1454	0.228639	0.154199	0.195852	0.0194468	0.101852	0.00706044
		881.559	12.882	2.48403e+06	2.48403e+06	1.1022e+06	1.37014e+06	1.7472e+06	1.12903e+06	1.39636e+06	2.01126e+06	1.73765e+06	1.35084e+06	1.61862e+06	1.2564e+06	1.28339e+06	44.36	21.77	19.52	14.56	2.73557e+06	1.1932e+06	1.39607e+06	1.94338e+06	1.2993e+06	1.48761e+06	2.14678e+06	1.86197e+06	1.36604e+06	1.78744e+06	1.31795e+06	1.28339e+06	1.77495e+06	1.57677e+06	1.7916e+06	1.46293e+06	838087	331167	395095	281569	1.21328	1.07781	1.22467	0.278916	0.108109	0.292387	0.574057	0.67364	0.305749
	C41 H60 O10	712.412	13.652	4.86402e+06	4.46881e+06	4.33736e+06	4.86402e+06	3.99878e+06	4.47315e+06	4.33636e+06	4.40822e+06	3.92304e+06	4.39556e+06	4.07599e+06	4.06454e+06	4.00557e+06	6.02	5.72	6.52	0.93	4.92133e+06	4.69547e+06	4.95605e+06	4.44778e+06	5.14777e+06	4.61974e+06	4.70525e+06	4.20372e+06	4.44505e+06	4.50111e+06	4.26368e+06	4.00557e+06	4.85761e+06	4.73843e+06	4.45134e+06	4.25679e+06	141491	364775	250822	247842	1.14115	1.11315	1.0457	0.190483	0.154644	0.0644749	0.0218386	0.1315	0.393367
	C47 H54 O5	698.397	13.267	681130	605045	593148	681130	548545	468418	540470	587272	526939	595838	554617	579429	597305	7.62	8.5	6.59	3.71	666313	642120	694018	610137	539063	575789	626842	564640	602545	612462	607818	597305	667484	574996	598009	605862	25968.6	35543.5	31348.1	7765.3	1.10171	0.949055	0.987039	0.139744	-0.0754357	-0.0188204	0.0169914	0.215654	0.695305
		599.384	12.775	637609	617255	630346	637609	492583	502553	544789	536917	526587	577717	512910	456298	535148	1.64	5.4	4.94	8.11	679760	682389	649673	547891	578345	580391	573095	564263	584221	566405	478654	535148	670607	568876	573859	526736	18177.3	18201.9	10000.6	44475.9	1.27314	1.08	1.08946	0.348389	0.111035	0.123619	0.00657711	0.203427	0.147869
	C43 H50 O2	598.381	12.956	3.37771e+06	2.22217e+06	3.14815e+06	3.37771e+06	2.49087e+06	2.5746e+06	2.74982e+06	2.05491e+06	2.43471e+06	2.73186e+06	2.85164e+06	2.61311e+06	2.27398e+06	20.98	5.07	14.1	11.25	2.44719e+06	3.40807e+06	3.44162e+06	2.77056e+06	2.96289e+06	2.92952e+06	2.19337e+06	2.60891e+06	2.76261e+06	3.14905e+06	2.74114e+06	2.27398e+06	3.09896e+06	2.88765e+06	2.52163e+06	2.72139e+06	564699	102774	294488	437872	1.13874	1.0611	0.926596	0.18744	0.0855542	-0.109987	0.411873	0.556829	0.547828
		584.365	12.475	766504	545311	629661	766504	543889	420896	488699	503039	418027	467306	514628	506021	598610	17.25	12.72	9.22	9.48	600530	681648	781007	604959	484374	520635	536934	447936	472566	568303	530813	598610	687728	536656	485812	565909	90391.7	61868.3	45953.8	33961.6	1.21526	0.948308	0.858464	0.281269	-0.0765723	-0.22017	0.094204	0.51251	0.0721481
	C41 H44 O3	584.329	16.563	1.66978e+06	1.63116e+06	1.60939e+06	1.4654e+06	1.37846e+06	1.30699e+06	1.41052e+06	1.27493e+06	1.24097e+06	1.1601e+06	1.66978e+06	1.36073e+06	1.58537e+06	5.74	3.88	4.81	10.38	1.79633e+06	1.74226e+06	1.49312e+06	1.53324e+06	1.50411e+06	1.5027e+06	1.36083e+06	1.32976e+06	1.17316e+06	1.84393e+06	1.4274e+06	1.58537e+06	1.67724e+06	1.51335e+06	1.28792e+06	1.6189e+06	161725	17239.4	100591	210283	1.03604	0.934799	0.795551	0.0510744	-0.0972719	-0.329974	0.722642	0.435092	0.069742
		554.878	16.087	1.0467e+07	8.11231e+06	7.99886e+06	8.37097e+06	7.95633e+06	7.95938e+06	8.35112e+06	1.0467e+07	9.26342e+06	8.91531e+06	1.02962e+07	9.03923e+06	7.84988e+06	2.34	2.81	8.53	13.5	8.93377e+06	8.65928e+06	8.52935e+06	8.84969e+06	9.15977e+06	8.89686e+06	1.11723e+07	9.9262e+06	9.01567e+06	1.13701e+07	9.4821e+06	7.84988e+06	8.70747e+06	8.96877e+06	1.00381e+07	9.56735e+06	206470	167084	1.08265e+06	1.76164e+06	0.910123	0.937436	1.0492	-0.135866	-0.0932086	0.0692886	0.448339	0.589413	0.713485
		502.316	12.636	949452	929207	827917	949452	602292	574342	636033	549635	511395	469926	686549	705171	698736	7.22	5.11	7.81	1.36	1.0233e+06	896273	967416	669919	660962	677598	586670	547984	475215	758155	739721	698736	962329	669493	536623	732204	63666	8326.24	56589.2	30413.9	1.31429	0.914353	0.732888	0.394285	-0.129176	-0.448336	0.00483658	0.0261836	0.00619987
	C31 H48 O4	484.35	11.458	1.76266e+06	1.75564e+06	1.62412e+06	1.76266e+06	1.39635e+06	1.10826e+06	1.37605e+06	1.49532e+06	1.25879e+06	1.51311e+06	1.48194e+06	1.33891e+06	1.48684e+06	4.55	12.43	9.98	5.85	1.93342e+06	1.75822e+06	1.79601e+06	1.55314e+06	1.2754e+06	1.46597e+06	1.59608e+06	1.34886e+06	1.53015e+06	1.6365e+06	1.40451e+06	1.48684e+06	1.82921e+06	1.4315e+06	1.49169e+06	1.50928e+06	92201.5	142040	128018	117616	1.21198	0.948465	0.988347	0.27736	-0.076333	-0.016911	0.0206921	0.505557	0.869408
		471.282	15.468	672724	668311	651888	672724	464462	466259	480331	507105	494775	490870	490586	489503	518733	1.65	1.85	1.7	3.32	735986	705710	685452	516613	536578	511720	541275	530176	496395	541753	513486	518733	709049	521637	522615	524657	25431.6	13168.6	23375.3	15036.1	1.35145	0.994244	0.996108	0.434511	-0.0083285	-0.0056262	0.000415377	0.80647	0.904877
	C29 H42 O5	470.298	15.424	1.5016e+06	1.31658e+06	1.32021e+06	1.24241e+06	1.20831e+06	1.19186e+06	1.10267e+06	1.04386e+06	898069	1.08363e+06	1.5016e+06	1.33294e+06	1.40783e+06	3.4	4.87	9.69	5.98	1.4499e+06	1.42921e+06	1.26591e+06	1.34398e+06	1.37161e+06	1174733	1.1142e+06	962325	1.09583e+06	1.65822e+06	1.39825e+06	1.40783e+06	1.38167e+06	1.29677e+06	1.05745e+06	1.4881e+06	100783	106589	82890.5	147404	0.92848	0.871429	0.710603	-0.107057	-0.198545	-0.492884	0.360239	0.142585	0.0115939
	C31 H48 O3	468.355	12.114	394254	362136	334749	394254	241032	213424	239639	228280	201991	216119	329501	290211	313218	8.19	6.72	6.11	6.35	398806	362387	401714	268096	245612	255299	243661	216443	218552	363867	304430	313218	387635	256336	226218	327172	21914.4	11277.7	15142.6	32081.8	1.18481	0.78349	0.691437	0.244653	-0.352014	-0.532331	0.0543463	0.0225986	0.00787923
		459.245	13.416	1.89038e+06	1.84526e+06	1.7634e+06	1.89038e+06	1.44572e+06	1.28415e+06	1.54999e+06	1.56314e+06	1.37387e+06	1.46917e+06	1.45415e+06	1.33146e+06	1.52215e+06	3.51	9.39	6.44	6.73	2.03211e+06	1.90899e+06	1.92614e+06	1.60804e+06	1.47782e+06	1.65129e+06	1.66846e+06	1.47217e+06	1.4857e+06	1.60581e+06	1.39669e+06	1.52215e+06	1.95575e+06	1.57905e+06	1.54211e+06	1.50822e+06	66687.3	90293.2	109632	105253	1.29673	1.04696	1.02247	0.374876	0.0662115	0.0320619	0.00339909	0.426304	0.718962
	C24 H30 O8	446.193	17.005	3.58754e+06	3.58754e+06	3.4876e+06	3.52633e+06	2.94031e+06	2.61928e+06	2.84054e+06	3.09399e+06	2.85806e+06	2.98034e+06	3.30638e+06	3.26761e+06	3.4746e+06	1.43	5.87	3.96	3.28	3.95082e+06	3.77555e+06	3.59305e+06	3.27046e+06	3.01431e+06	3.02617e+06	3.30247e+06	3.06255e+06	3.01389e+06	3.65123e+06	3.42771e+06	3.4746e+06	3.77314e+06	3.10365e+06	3.1263e+06	3.51784e+06	178899	144583	154492	117869	1.07257	0.882258	0.888698	0.101075	-0.180727	-0.170235	0.107962	0.0183671	0.025124
		445.827	1.432	3838531	2.93158e+06	2.16678e+06	2.34767e+06	3.29333e+06	2.02973e+06	938496	1.96956e+06	1.49842e+06	841713	3838531	1.95166e+06	2.00407e+06	16.1	56.46	39.43	41.36	3.22844e+06	2.34568e+06	2.39209e+06	3.66311e+06	2.33584e+06	999827	2.10227e+06	1.60563e+06	851188	4.23888e+06	2.04728e+06	2.00407e+06	2.6554e+06	2.33293e+06	1.5197e+06	2.76341e+06	496806	1.33164e+06	629953	1.27798e+06	0.960914	0.84422	0.549934	-0.0575209	-0.24431	-0.862668	0.898064	0.70689	0.205093
		435.871	1.267	1.61218e+07	1.61218e+07	1.05797e+07	9.32013e+06	8.25774e+06	9.47674e+06	1.18732e+07	9.09561e+06	1.11526e+07	1.11689e+07	9.67567e+06	8.61508e+06	9.54166e+06	30.14	18.64	11.39	6.23	1.77543e+07	1.14532e+07	9.49647e+06	9.18494e+06	1.0906e+07	1.26492e+07	9.70848e+06	1.19505e+07	1.12946e+07	1.06848e+07	9.03717e+06	9.54166e+06	1.29013e+07	1.09134e+07	1.09845e+07	9.75455e+06	4.31519e+06	1.73212e+06	1.15274e+06	844204	1.3226	1.1188	1.12609	0.403375	0.161948	0.171329	0.282887	0.356396	0.210212
		433.897	16.088	4.18131e+06	3.49087e+06	3.03715e+06	3.50772e+06	3.26526e+06	3.00219e+06	3.28084e+06	4.18131e+06	3.4669e+06	3.83097e+06	4.09984e+06	3.61034e+06	3.77383e+06	7.98	4.92	9.34	6.51	3.84436e+06	3.2879e+06	3.57409e+06	3.63189e+06	3.45497e+06	3.49524e+06	4.46305e+06	3.71495e+06	3.87409e+06	4.52744e+06	3.78722e+06	3.77383e+06	3.56878e+06	3.52737e+06	4.01736e+06	4.0295e+06	278267	92733	394091	431285	0.885665	0.875387	0.996989	-0.175167	-0.192007	-0.0043508	0.194988	0.119963	0.973028
		430.239	14.014	2.32595e+06	2.00199e+06	2.21785e+06	2.32595e+06	1.68353e+06	1.65711e+06	1.74487e+06	1.79577e+06	1.71468e+06	1.74597e+06	1.87973e+06	1.64418e+06	1.87053e+06	7.56	2.66	2.33	7.42	2.20471e+06	2.40097e+06	2.36996e+06	1.87257e+06	1.90703e+06	1.85889e+06	1.91677e+06	1.83737e+06	1.76563e+06	2.07579e+06	1.72474e+06	1.87053e+06	2.32521e+06	1.8795e+06	1.83992e+06	1.89035e+06	105501	24804.4	75605.5	176362	1.23004	0.994258	0.973323	0.298709	-0.00830855	-0.0390088	0.0214845	0.921005	0.672586
		429.235	14.032	1.13527e+07	9.96296e+06	1.06489e+07	1.13527e+07	8.34755e+06	7.55763e+06	8.09156e+06	8.33023e+06	8.19464e+06	8.26939e+06	8.95302e+06	7.83853e+06	8.61509e+06	6.52	5.04	0.82	6.75	1.09718e+07	1.15281e+07	1.15675e+07	9.28483e+06	8.69744e+06	8.62035e+06	8.89153e+06	8.78095e+06	8.36248e+06	9.88679e+06	8.22257e+06	8.61509e+06	1.13558e+07	8.86754e+06	8.67832e+06	8.90815e+06	333106	363437	279058	869956	1.27476	0.995441	0.9742	0.350231	-0.00659219	-0.0377099	0.01041	0.944109	0.685527
	C24 H28 O7	428.182	17.007	1.94133e+06	1.94133e+06	1.80494e+06	1.85182e+06	1.58884e+06	1.37771e+06	1.48494e+06	1.60338e+06	1.43402e+06	1.53303e+06	1.77788e+06	1.76356e+06	1.83244e+06	3.71	7.11	5.58	2.03	2.13791e+06	1.95396e+06	1.88686e+06	1.76724e+06	1.58549e+06	1.58199e+06	1.71142e+06	1.53662e+06	1.55029e+06	1.9633e+06	1.84997e+06	1.83244e+06	1.99291e+06	1.64491e+06	1.59944e+06	1.8819e+06	129982	105962	97214.3	71036.9	1.05899	0.874065	0.849907	0.0826829	-0.194187	-0.234624	0.264078	0.0323491	0.0153067
		423.868	16.089	2.49958e+06	1.98429e+06	1.82597e+06	2.21619e+06	1.76478e+06	1.86699e+06	1.99965e+06	2.02828e+06	2.39008e+06	2.28333e+06	2.13706e+06	1.88801e+06	2.49958e+06	9.77	6.27	8.32	14.14	2.18522e+06	1.97673e+06	2.25812e+06	1.96293e+06	2.14856e+06	2.13033e+06	2.16494e+06	2.56109e+06	2.30904e+06	2.35995e+06	1.98051e+06	2.49958e+06	2.14003e+06	2.08061e+06	2.34502e+06	2.28001e+06	146041	102315	200509	268608	0.938602	0.912542	1.02851	-0.0914143	-0.132038	0.0405603	0.472139	0.295795	0.753805
		415.219	13.331	2.56597e+06	2.56597e+06	2.30527e+06	2.4228e+06	1.89407e+06	1.77899e+06	1.97577e+06	1.75793e+06	1.56433e+06	1.60567e+06	2.17713e+06	2.13788e+06	2.11035e+06	5.37	5.25	6.21	1.57	2.8258e+06	2.4956e+06	2.46864e+06	2.10674e+06	2.04729e+06	2.10488e+06	1.87638e+06	1.67625e+06	1.62375e+06	2.40419e+06	2.24263e+06	2.11035e+06	2.59668e+06	2.0863e+06	1.72546e+06	2.25239e+06	198884	33799.1	133312	147165	1.15286	0.926262	0.766058	0.205212	-0.110508	-0.384475	0.0735331	0.129467	0.0100594
		413.889	1.304	2.36067e+07	1.90342e+07	1.82435e+07	2.36067e+07	2.03317e+07	1.96061e+07	2.19186e+07	2.19859e+07	1.84646e+07	20773074	1.84682e+07	2.01021e+07	2.14113e+07	14.27	5.74	8.77	7.38	2.09616e+07	1.97497e+07	2.40534e+07	2.26146e+07	2.2563e+07	2.33509e+07	2.34673e+07	1.97857e+07	2.10069e+07	2.03943e+07	2.1087e+07	2.14113e+07	2.15882e+07	2.28429e+07	2.142e+07	2.09642e+07	2.21918e+06	440768	1.87523e+06	519470	1.02977	1.08961	1.02174	0.0423187	0.123816	0.0310309	0.660052	0.00879921	0.705713
		405.9	1.532	5.48125e+06	4.83741e+06	1.19618e+06	2.23975e+06	5.48125e+06	3.55628e+06	3.65134e+06	4.92652e+06	2.93967e+06	4.47934e+06	4.95537e+06	1.09072e+06	2.03071e+06	67.99	25.65	25.33	74.86	5.32726e+06	1.29494e+06	2.28213e+06	6.0967e+06	4.09262e+06	3.88995e+06	5.25847e+06	3.14999e+06	4.52976e+06	5.4722e+06	1.14416e+06	2.03071e+06	2.96811e+06	4.69309e+06	4.31274e+06	2.88236e+06	2.10186e+06	1.21978e+06	1.07086e+06	2.28625e+06	1.02975	1.62821	1.49626	0.0422955	0.70329	0.581357	0.964148	0.292785	0.381988
		404.892	1.495	5.93632e+06	4.37083e+06	4.13113e+06	5.41621e+06	4.41188e+06	4.34664e+06	5.93632e+06	3.22727e+06	4.14039e+06	5.15731e+06	2.12315e+06	4.73991e+06	5.21519e+06	14.73	18.36	23.13	41.36	4.81343e+06	4.47221e+06	5.51869e+06	4.90725e+06	5.00218e+06	6.32425e+06	3.44472e+06	4.43663e+06	5.21537e+06	2.34459e+06	4.97214e+06	5.21519e+06	4.93478e+06	5.41123e+06	4.36557e+06	4.17731e+06	533688	792124	887459	1.59182e+06	1.18133	1.29539	1.04507	0.240412	0.373383	0.0635979	0.478205	0.29565	0.866695
		400.898	1.496	3.42032e+06	1.20109e+06	2.56293e+06	3.12698e+06	1.33285e+06	3.05961e+06	3.38753e+06	2.47842e+06	2.73909e+06	3.40427e+06	1.3982e+06	2.58814e+06	3.42032e+06	43.1	42.56	16.61	41.17	1.32272e+06	2.77454e+06	3.18614e+06	1.48251e+06	3.52105e+06	3.6089e+06	2.64542e+06	2.93507e+06	3.44259e+06	1.54403e+06	2.71494e+06	3.42032e+06	2.4278e+06	2.87082e+06	3.0077e+06	2.55977e+06	978906	1.20311e+06	403518	947726	0.948446	1.12152	1.17499	-0.0763622	0.165452	0.232647	0.874914	0.742757	0.493234
		398.897	1.348	3.0292e+06	2.87292e+06	2.98892e+06	2.56376e+06	2.33586e+06	2.60072e+06	1.90361e+06	2.85735e+06	3.0292e+06	2.36115e+06	2.84586e+06	2.6721e+06	2.14411e+06	7.83	15.43	12.62	14.31	3.16383e+06	3.2357e+06	2.61227e+06	2.59813e+06	2.99294e+06	2.02801e+06	3.04988e+06	3.24593e+06	2.38773e+06	3.14267e+06	2.80302e+06	2.14411e+06	3.00393e+06	2.53969e+06	2.89451e+06	2.6966e+06	341090	485116	449703	507717	1.11397	0.941814	1.07339	0.155711	-0.0864866	0.102178	0.433253	0.718455	0.639845
		389.927	1.534	3.79098e+06	1.19838e+06	1.06361e+06	2.41966e+06	1.09084e+06	3.30625e+06	1.22633e+06	3.39415e+06	1.24823e+06	3.79098e+06	1.07133e+06	1.15215e+06	2.6269e+06	47.87	66.25	48.66	54.16	1.31973e+06	1.15143e+06	2.46544e+06	1.21332e+06	3.80488e+06	1.30647e+06	3.62285e+06	1.33753e+06	3.83366e+06	1.18307e+06	1.20859e+06	2.6269e+06	1.64553e+06	2.10823e+06	2.93135e+06	1.67285e+06	715029	1.47009e+06	1.3843e+06	826325	0.983667	1.26026	1.7523	-0.0237574	0.333719	0.809254	0.967533	0.677907	0.247743
		382.88	1.048	1.32365e+06	1.07567e+06	1.11982e+06	1.02609e+06	1.04553e+06	1.05205e+06	997192	1.06037e+06	1.24006e+06	1.32365e+06	964554	1.03433e+06	1.09526e+06	4.37	2.9	11.14	6.34	1.1846e+06	1.21228e+06	1.0455e+06	1.16293e+06	1.21071e+06	1.06236e+06	1.13182e+06	1.32878e+06	1.33855e+06	1.06515e+06	1.085e+06	1.09526e+06	1.14746e+06	1.14533e+06	1.26638e+06	1.08181e+06	89377.4	75724.6	116636	15306.4	1.06069	1.05872	1.17062	0.0850008	0.082323	0.227271	0.278115	0.227495	0.0531142
		380.253	17.971	7.21721e+06	1.54869e+06	1.64176e+06	1.84233e+06	567061	636276	760506	6.46682e+06	4.08631e+06	7.21721e+06	6.36211e+06	6.41289e+06	7.02538e+06	8.95	14.97	27.6	5.59	1.70551e+06	1.77731e+06	1.87719e+06	630732	732237	810205	6.90255e+06	4.37868e+06	7.29846e+06	7.02566e+06	6.72708e+06	7.02538e+06	1.78667e+06	724391	6.19323e+06	6.92604e+06	86220.4	89993.2	1.58386e+06	172305	0.257964	0.10459	0.894195	-1.95476	-3.25719	-0.161338	1.3128e-06	6.42148e-07	0.470253
		375.297	18.115	4.67002e+06	1.29598e+06	1.11334e+06	1.08972e+06	562437	422161	427119	4.40115e+06	2.59319e+06	3.96117e+06	4.67002e+06	3.31608e+06	3.68511e+06	9.68	16.91	25.82	17.99	1.42722e+06	1.20526e+06	1.11034e+06	625589	485829	455031	4.6977e+06	2.77873e+06	4.00576e+06	5.15709e+06	3.47855e+06	3.68511e+06	1.2476e+06	522150	3.8274e+06	4.10692e+06	162627	90895.2	971840	915321	0.303781	0.127139	0.93194	-1.71889	-2.97552	-0.101692	0.00597648	0.00251113	0.735219
		375.297	17.6	3.32953e+06	992142	789547	792528	416402	293874	322542	2.79361e+06	2.53624e+06	2.52205e+06	3.32953e+06	2.53493e+06	2.24358e+06	13.53	18.62	5.84	20.8	1.09261e+06	854735	807523	463157	338195	343620	2.98184e+06	2.71771e+06	2.55044e+06	3.67679e+06	2.65913e+06	2.24358e+06	918288	381657	2.74999e+06	2.85983e+06	152800	70632.8	217507	737382	0.321099	0.133455	0.961593	-1.63891	-2.90558	-0.0565011	0.0111118	0.00440986	0.816738
		359.864	1.054	2.22259e+06	1.45453e+06	1.8947e+06	1.57191e+06	1.43739e+06	1.77043e+06	1.6964e+06	1.51073e+06	2.00019e+06	2.22259e+06	1.27734e+06	1.61282e+06	1.43043e+06	13.9	10.7	19.06	11.66	1.60182e+06	2.05114e+06	1.60165e+06	1.59879e+06	2.03744e+06	1.80726e+06	1.61252e+06	2.1433e+06	2.2476e+06	1.41056e+06	1.69184e+06	1.43043e+06	1.75154e+06	1.8145e+06	2.00114e+06	1.51094e+06	259463	219417	340573	156972	1.15923	1.2009	1.32443	0.213171	0.26412	0.405374	0.241357	0.12312	0.0862893
		357.867	1.05	1.28667e+06	864208	1.08399e+06	905500	829561	978067	963161	887743	1.13111e+06	1.28667e+06	727793	952657	1.03845e+06	12.28	8.85	18.25	17.7	951719	1.17349e+06	922632	922706	1.12558e+06	1.0261e+06	947560	1.21204e+06	1.30116e+06	803700	999332	1.03845e+06	1.01595e+06	1.0248e+06	1.15358e+06	947162	137209	101441	183902	125772	1.07262	1.08196	1.21794	0.101143	0.113653	0.284441	0.556941	0.452106	0.183816
		357.25	14.373	787062	762178	787062	714279	523490	479423	585413	546855	532200	511103	549313	489025	536319	4.9	10.06	3.39	6.04	839357	852044	727793	582269	551728	623670	583703	570278	516856	606605	512984	536319	806398	585889	556946	551969	68368.9	36107.4	35361.4	48733	1.46095	1.06145	1.00902	0.546904	0.0860389	0.0129482	0.00630252	0.387572	0.893095
		355.954	16.087	1.5114e+06	1.1277e+06	1.20303e+06	1.2468e+06	1.08951e+06	1.17116e+06	1.28538e+06	1.34159e+06	1.34689e+06	1.5114e+06	1.37706e+06	1.34789e+06	1.40759e+06	5.05	8.32	6.9	2.17	1.24189e+06	1.30235e+06	1.27039e+06	1.21185e+06	1.34779e+06	1.36937e+06	1.43199e+06	1.44326e+06	1.52841e+06	1.52069e+06	1.41392e+06	1.40759e+06	1.27154e+06	1.30967e+06	1.46788e+06	1.4474e+06	30248.4	85402.2	52718	63546.4	0.878502	0.904842	1.01415	-0.186883	-0.144262	0.0202725	0.0123697	0.0885203	0.689573
		348.926	1.502	2.19888e+06	2.17462e+06	1.86472e+06	2.1781e+06	2.04929e+06	1.81646e+06	1.16303e+06	1.96026e+06	1.86988e+06	2.19888e+06	2.02587e+06	1.88229e+06	1.98869e+06	8.68	27.41	8.46	3.79	2.39483e+06	2.01867e+06	2.21931e+06	2.27939e+06	2.09041e+06	1.23903e+06	2.09234e+06	2.00367e+06	2.22364e+06	2.23717e+06	1.97451e+06	1.98869e+06	2.21094e+06	1.86961e+06	2.10655e+06	2.06679e+06	188216	554211	110670	147720	1.06974	0.904597	1.01924	0.0972664	-0.144653	0.027491	0.355629	0.5836	0.727997
		347.891	1.062	1.88272e+06	1.70425e+06	1.30206e+06	1.28361e+06	1.34931e+06	1.33647e+06	1.1479e+06	1.88272e+06	1.76367e+06	1.65251e+06	1.34975e+06	1.40416e+06	1.3084e+06	16.62	8.82	6.52	3.55	1.87682e+06	1.40957e+06	1.30789e+06	1.50081e+06	1.53804e+06	1.22291e+06	2.00958e+06	1.88986e+06	1.67111e+06	1.49053e+06	1.47296e+06	1.3084e+06	1.53143e+06	1.42059e+06	1.85685e+06	1.42396e+06	303410	172198	171632	100465	1.07547	0.99763	1.304	0.104967	-0.00342319	0.382946	0.591554	0.978014	0.0196021
		342.287	16.706	1.24609e+06	951965	1.08936e+06	1.08314e+06	1.14144e+06	939862	1.00934e+06	964141	943942	1.03565e+06	1.05799e+06	1.073e+06	1.24609e+06	7.45	9.94	4.91	9.29	1.04836e+06	1.1793e+06	1.10363e+06	1.26961e+06	1.08161e+06	1.0753e+06	1.02911e+06	1.01148e+06	1.0473e+06	1.16833e+06	1.12558e+06	1.24609e+06	1.11043e+06	1.14217e+06	1.0293e+06	1.18e+06	65731.9	110408	17913	61096.7	0.941045	0.967942	0.872286	-0.0876645	-0.0470072	-0.197127	0.250509	0.631	0.0148561
		341.853	1.052	2.22893e+06	1.39533e+06	1.55091e+06	1.37526e+06	1.36488e+06	1.46015e+06	1.37463e+06	1.40424e+06	2.09974e+06	2.22893e+06	1.25478e+06	1.38186e+06	1.5059e+06	6.67	3.74	23.21	9.09	1.53662e+06	1.67896e+06	1.40128e+06	1.51813e+06	1.68036e+06	1.46446e+06	1.49886e+06	2.24998e+06	2.25402e+06	1.38565e+06	1.44956e+06	1.5059e+06	1.53895e+06	1.55432e+06	2.00095e+06	1.44704e+06	138854	112406	434827	60162.6	1.06352	1.07414	1.38279	0.0888481	0.10318	0.467586	0.352131	0.218728	0.0941537
		337.894	1.251	1.6938e+07	1.09987e+07	1.32433e+07	1.58214e+07	1.3853e+07	1.6938e+07	1.50878e+07	1.32402e+07	1.46375e+07	1.40527e+07	1.48274e+07	1.36073e+07	1.52418e+07	18.07	10.15	5.02	5.84	1.21125e+07	1.43367e+07	1.61207e+07	1.54084e+07	1.94925e+07	1.60737e+07	1.41324e+07	1.56847e+07	1.42109e+07	1.63739e+07	1.4274e+07	1.52418e+07	1.419e+07	1.69915e+07	1.4676e+07	1.52966e+07	2.00813e+06	2.19128e+06	874479	1.05103e+06	0.927657	1.11081	0.959432	-0.108337	0.151611	-0.0597479	0.445371	0.293581	0.47575
	C20 H32 O4	336.227	17.606	5.92222e+06	4.41796e+06	5.43839e+06	4.69267e+06	1.86026e+06	2.03618e+06	1.75359e+06	4.71701e+06	4.70829e+06	5.92222e+06	4.60706e+06	5.2173e+06	5.58112e+06	10.89	7.58	13.65	9.58	4.86533e+06	5.88741e+06	4.78146e+06	2.06914e+06	2.34326e+06	1.86819e+06	5.03484e+06	5.04516e+06	5.98888e+06	5.08756e+06	5.47292e+06	5.58112e+06	5.17806e+06	2.09353e+06	5.3563e+06	5.38054e+06	615738	238475	547863	259425	0.96237	0.389093	0.995495	-0.0553371	-1.36181	-0.00651422	0.627423	8.58498e-05	0.948106
	C20 H32 O4	336.226	17.313	3.8493e+06	2.48193e+06	2.68884e+06	2.68242e+06	1.3872e+06	1.39511e+06	1.35492e+06	3.55019e+06	2.31028e+06	3.8493e+06	2.53759e+06	3.59817e+06	3.22056e+06	4.49	1.54	25.21	17.24	2.73325e+06	2.91084e+06	2.73318e+06	1.54296e+06	1.60552e+06	1.44346e+06	3.78941e+06	2.47558e+06	3.89263e+06	2.80226e+06	3.77446e+06	3.22056e+06	2.79242e+06	1.53065e+06	3.38587e+06	3.26576e+06	102553	81726.8	790023	487677	0.855061	0.468695	1.03678	-0.225901	-1.09328	0.0521086	0.175286	0.00370342	0.833676
		331.956	16.118	1.44074e+07	2.00758e+06	1.44074e+07	1.63758e+06	3.12049e+06	6.83735e+06	1.82352e+06	1.85504e+06	2.48857e+06	1.60469e+06	8.31457e+06	2.13479e+06	2.03706e+06	120.78	66.27	22.98	86.41	2.21087e+06	1.55969e+07	1.66856e+06	3.47087e+06	7.86853e+06	1.94269e+06	1.98004e+06	2.66662e+06	1.62275e+06	9.18176e+06	2.23938e+06	2.03706e+06	6.49211e+06	4.42736e+06	2.0898e+06	4.48607e+06	7.88965e+06	3.07653e+06	530520	4.06784e+06	1.44717	0.986914	0.465843	0.533237	-0.0190032	-1.10209	0.715436	0.985049	0.36889
		331.271	17.311	1.11563e+06	765987	681394	765245	397698	300144	344145	1.11563e+06	577198	990813	987996	946524	781240	6.59	14.07	31.51	12.08	843552	737652	779724	442353	345411	366635	1.1908e+06	618496	1.00197e+06	1.09104e+06	992898	781240	786976	384800	937089	955060	53321.1	50959.9	291618	158329	0.824007	0.402906	0.981183	-0.279271	-1.31148	-0.0274055	0.156363	0.00403209	0.929775
		329.855	1.051	1.24029e+06	1.04841e+06	1.06088e+06	803080	1.10707e+06	1.0004e+06	1.06426e+06	1.2213e+06	1.16772e+06	1.24029e+06	1.01161e+06	1.00042e+06	1.09596e+06	14.97	5.08	3.11	5.04	1.15457e+06	1.14847e+06	818275	1.23138e+06	1.15127e+06	1.13381e+06	1.3036e+06	1.25127e+06	1.25426e+06	1.11711e+06	1.04944e+06	1.09596e+06	1.04044e+06	1.17215e+06	1.26971e+06	1.0875e+06	192424	52026.5	29386	34622.4	0.956722	1.07784	1.16754	-0.0638277	0.10814	0.223477	0.698125	0.0788513	0.00225248
		327.886	1.504	2.33678e+07	2.33678e+07	5.428e+06	7.78996e+06	1.25306e+07	9.12865e+06	9.82466e+06	1.06711e+07	7.58787e+06	2.23356e+07	1.29009e+07	5.97047e+06	9.15504e+06	79.93	17.13	57.49	37.13	2.57341e+07	5.87615e+06	7.93735e+06	1.39376e+07	1.05054e+07	1.04667e+07	1.13901e+07	8.13077e+06	2.25871e+07	1.42465e+07	6.26299e+06	9.15504e+06	1.31825e+07	1.16366e+07	1.4036e+07	9.88817e+06	1.09187e+07	1.99286e+06	7.58264e+06	4.04192e+06	1.33316	1.17682	1.41947	0.414852	0.23489	0.505355	0.649738	0.538409	0.45014
		327.856	1.051	968958	821615	846602	858090	869039	784493	828738	939203	938297	968958	884827	826825	863207	2.21	5.11	1.84	3.42	904813	916501	874326	966617	902807	882896	1.00249e+06	1.00543e+06	979865	977113	867334	863207	898547	917440	995928	902551	21774.7	43736.5	13988.3	64605	0.995563	1.0165	1.10346	-0.00641566	0.0236048	0.142032	0.923857	0.757579	0.070695
		326.878	1.522	9.53569e+06	5.58971e+06	6.20547e+06	8.96718e+06	5.88153e+06	6.73404e+06	8.44189e+06	6.70213e+06	6.41659e+06	9.53569e+06	3.38385e+06	6.32272e+06	9.53211e+06	25.99	18.57	22.83	47.95	6.15573e+06	6.71781e+06	9.13684e+06	6.54192e+06	7.74964e+06	8.99357e+06	7.15372e+06	6.87569e+06	9.64303e+06	3.73678e+06	6.6325e+06	9.53211e+06	7.3368e+06	7.76171e+06	7.89082e+06	6.6338e+06	1.58402e+06	1.22587e+06	1.52382e+06	2.89766e+06	1.10597	1.17002	1.18949	0.145315	0.226539	0.250339	0.731026	0.568284	0.542419
		325.86	1.053	2.87103e+06	1.7678e+06	1.46959e+06	1.57363e+06	2.27144e+06	2.2669e+06	2.45547e+06	1.70823e+06	1.71023e+06	2.87103e+06	1.50439e+06	1.51754e+06	2.54403e+06	9.44	4.61	31.99	32.15	1.94681e+06	1.59093e+06	1.6034e+06	2.52649e+06	2.60879e+06	2.61594e+06	1.82333e+06	1.83259e+06	2.90335e+06	1.6613e+06	1.59189e+06	2.54403e+06	1.71371e+06	2.58374e+06	2.18642e+06	1.93241e+06	201964	49709.1	620892	530815	0.886828	1.33706	1.13145	-0.173274	0.41906	0.178172	0.541303	0.101796	0.618737
		324.875	1.059	3.56356e+06	2.75296e+06	2.43736e+06	2.89386e+06	2.10271e+06	2.44568e+06	2.75088e+06	3.33371e+06	3.21895e+06	3.56356e+06	2.33757e+06	2.57626e+06	2.76927e+06	8.67	13.33	5.2	8.44	3.03173e+06	2.6386e+06	2.94861e+06	2.33881e+06	2.81452e+06	2.93065e+06	3.55834e+06	3.44926e+06	3.60367e+06	2.58137e+06	2.70248e+06	2.76927e+06	2.87298e+06	2.69466e+06	3.53709e+06	2.68437e+06	207192	313599	79371.3	95251.9	1.07026	1.00383	1.31766	0.0979619	0.00551766	0.397977	0.225265	0.959255	0.000284487
		320.88	1.059	5.03358e+06	2.39047e+06	3.96149e+06	2.74291e+06	3.5525e+06	2.23116e+06	2.45124e+06	5.03358e+06	3.05489e+06	3.2044e+06	2.33073e+06	2.40112e+06	2.33839e+06	27.19	25.79	29.27	1.64	2.63253e+06	4.28857e+06	2.79481e+06	3.95139e+06	2.56765e+06	2.61143e+06	5.37275e+06	3.27346e+06	3.24047e+06	2.57382e+06	2.51876e+06	2.33839e+06	3.23864e+06	3.04349e+06	3.96223e+06	2.47699e+06	912880	786566	1.22166e+06	123147	1.30749	1.22871	1.59961	0.386799	0.29714	0.677724	0.225372	0.28527	0.104225
		319.154	12.27	1.73242e+06	1.60098e+06	1.73173e+06	1.73242e+06	1.15601e+06	941599	1.05877e+06	821127	613584	589203	1.25683e+06	1.16474e+06	1.15113e+06	4.48	10.2	18.89	4.83	1.76309e+06	1.8747e+06	1.7652e+06	1.28581e+06	1.08361e+06	1.12796e+06	876455	657485	595836	1.38792e+06	1.22181e+06	1.15113e+06	1.801e+06	1.16579e+06	709925	1.25362e+06	63838.8	106280	147476	121555	1.43664	0.929944	0.566301	0.522698	-0.104785	-0.82036	0.00230684	0.399485	0.00788733
		315.913	1.299	7.62467e+07	6.15413e+07	6.24625e+07	7.18637e+07	6.42819e+07	5.47769e+07	6.98132e+07	4.91989e+07	6.39482e+07	6.88118e+07	5.96503e+07	6.67705e+07	7.62467e+07	8.75	12.08	16.84	12.32	6.77731e+07	6.76196e+07	7.32234e+07	7.14996e+07	6.30381e+07	7.43755e+07	5.25139e+07	6.85236e+07	6.95864e+07	6.58717e+07	7.00418e+07	7.62467e+07	6.95387e+07	6.96377e+07	6.35413e+07	7.07201e+07	3.19195e+06	5.89357e+06	9.56476e+06	5.22069e+06	0.983295	0.984695	0.898491	-0.0243036	-0.0222514	-0.154425	0.754883	0.823495	0.317518
		315.203	11.139	1.33439e+07	1.33439e+07	1.28159e+07	1.3304e+07	1.0994e+07	9.28292e+06	1.02414e+07	1.14921e+07	1.02229e+07	1.14503e+07	1.12725e+07	9.52513e+06	1.08172e+07	2.24	8.43	6.52	8.6	1.46951e+07	1.3874e+07	1.35557e+07	1.22284e+07	1.06829e+07	1.09107e+07	1.22665e+07	1.09543e+07	1.15792e+07	1.24482e+07	9.99181e+06	1.08172e+07	1.40416e+07	1.1274e+07	1.16e+07	1.10857e+07	587909	834326	656312	1.25001e+06	1.26664	1.01698	1.04639	0.341005	0.0242945	0.0654186	0.0207208	0.838849	0.562365
		315.203	12.499	4.04299e+06	3.0268e+06	3.1081e+06	4.04299e+06	2.485e+06	2.07681e+06	2.39864e+06	3.03276e+06	2.43244e+06	2.58711e+06	2.80486e+06	2.56872e+06	2.9841e+06	16.64	9.27	11.61	7.48	3.33329e+06	3.36471e+06	4.11949e+06	2.76402e+06	2.39003e+06	2.5554e+06	3.23711e+06	2.60648e+06	2.61623e+06	3.0974e+06	2.69457e+06	2.9841e+06	3.60583e+06	2.56982e+06	2.81994e+06	2.92536e+06	445115	187414	361314	207743	1.23261	0.878462	0.963964	0.301719	-0.186948	-0.0529487	0.0744029	0.0925484	0.683937
	C15 H22 O7	314.137	13.96	2.7859e+06	2.7859e+06	2.63438e+06	2.3788e+06	2.04358e+06	2.30883e+06	2.51658e+06	2.37064e+06	2.28823e+06	2.5519e+06	2.61164e+06	2.46011e+06	2.78324e+06	7.91	10.35	5.61	6.17	3.068e+06	2.85188e+06	2.42381e+06	2.27304e+06	2.65704e+06	2.68104e+06	2.53038e+06	2.45195e+06	2.58063e+06	2.88403e+06	2.58064e+06	2.78324e+06	2.78123e+06	2.53704e+06	2.52099e+06	2.7493e+06	327858	228946	64854	154517	1.01161	0.922794	0.916954	0.0166574	-0.11592	-0.125078	0.88612	0.253969	0.0776725
		312.917	16.094	1.75299e+06	1.60379e+06	1.35615e+06	1.53605e+06	1.29551e+06	1.23811e+06	1.47393e+06	1.75299e+06	1.39886e+06	1.43051e+06	1.6842e+06	1.29861e+06	1.41152e+06	8.54	9.21	12.83	13.53	1.7662e+06	1.46811e+06	1.56511e+06	1.44098e+06	1.42484e+06	1.57025e+06	1.87111e+06	1.49894e+06	1.44662e+06	1.85986e+06	1.36223e+06	1.41152e+06	1.59981e+06	1.47869e+06	1.60556e+06	1.54454e+06	152040	79706.7	231457	274188	1.03578	0.957367	1.03951	0.0507244	-0.0628567	0.0558983	0.775333	0.709982	0.782997
		311.88	1.143	1.81907e+06	1.37774e+06	1.60765e+06	1.55548e+06	1.3193e+06	1.77624e+06	1.53655e+06	1.5213e+06	1.70123e+06	1.81907e+06	1.26747e+06	1.71723e+06	1.59737e+06	7.96	14.8	8.92	15.25	1.51725e+06	1.74038e+06	1.58491e+06	1.46744e+06	2.04413e+06	1.63697e+06	1.6238e+06	1.82295e+06	1.83955e+06	1.39966e+06	1.80137e+06	1.59737e+06	1.61418e+06	1.71618e+06	1.7621e+06	1.59947e+06	114407	296394	120056	200861	1.0092	1.07297	1.10168	0.0132137	0.101608	0.139706	0.917504	0.602505	0.295041
		309.924	1.539	3.64281e+06	3.07967e+06	1.89308e+06	2.80218e+06	3.64281e+06	2.36518e+06	3.36216e+06	3.49223e+06	2.51547e+06	3.38853e+06	3.20172e+06	2.27235e+06	2.62571e+06	23.95	21.5	17.13	17.37	3.39153e+06	2.04938e+06	2.8552e+06	4.05183e+06	2.72189e+06	3.58188e+06	3.72754e+06	2.69545e+06	3.42667e+06	3.53565e+06	2.38368e+06	2.62571e+06	2.76537e+06	3.45187e+06	3.28322e+06	2.84835e+06	675570	674436	530790	607402	0.970868	1.21188	1.15268	-0.0426531	0.277252	0.204987	0.881963	0.313596	0.403282
		307.923	1.504	2.2518e+07	2.10866e+07	1.74662e+07	2.2518e+07	1.79981e+07	1.14732e+07	1.25813e+07	2.16933e+07	1.76082e+07	1.468e+07	2.12752e+07	1.71482e+07	1.72051e+07	12.79	24.91	19.58	12.76	2.32219e+07	1.89082e+07	2.2944e+07	2.0019e+07	1.32035e+07	1.34035e+07	2.31551e+07	1.8868e+07	1.48453e+07	2.34942e+07	1.79884e+07	1.72051e+07	2.16914e+07	1.5542e+07	1.89561e+07	1.95626e+07	2.41428e+06	3.87848e+06	4.1556e+06	3.42735e+06	1.10882	0.794477	0.969	0.149027	-0.331922	-0.0454313	0.428783	0.249692	0.854899
		306.864	1.059	3.83275e+06	3.49252e+06	2.59669e+06	2.95765e+06	2.48124e+06	2.88345e+06	2.79951e+06	3.78494e+06	3.74972e+06	3.83275e+06	2.82433e+06	2.99278e+06	3.11362e+06	14.95	7.8	1.1	4.88	3.84618e+06	2.81108e+06	3.01361e+06	2.75984e+06	3.31832e+06	2.98246e+06	4.03997e+06	4.01801e+06	3.87589e+06	3.1189e+06	3.13941e+06	3.11362e+06	3.22363e+06	3.02021e+06	3.97796e+06	3.12398e+06	548573	281149	89072.8	13628.2	1.0319	0.966784	1.27336	0.0453012	-0.0487352	0.348645	0.768837	0.557861	8.06347e-05
		304.958	16.09	2.94737e+06	2.58479e+06	2.14951e+06	1.54593e+06	2.62437e+06	2.37128e+06	1.71432e+06	2.86131e+06	2.39452e+06	1.97401e+06	2.94737e+06	2.24821e+06	1.92151e+06	24.92	21	18.42	22.09	2.84653e+06	2.32698e+06	1.57518e+06	2.91904e+06	2.72891e+06	1.82635e+06	3.05411e+06	2.56585e+06	1.99623e+06	3.25477e+06	2.35836e+06	1.92151e+06	2.24956e+06	2.49143e+06	2.53873e+06	2.51155e+06	639200	583767	529461	679705	0.895688	0.991991	1.01082	-0.158932	-0.0116007	0.015531	0.652174	0.970847	0.95904
		302.958	16.091	1.01656e+06	813510	559878	472913	772838	674074	496510	934153	743429	616949	1.01656e+06	674157	508593	28.75	21.62	20.88	35.34	895888	606103	481861	859615	775735	528957	997097	796620	623894	1.12258e+06	707187	508593	661284	721436	805870	779454	212458	171887	186773	313309	0.848394	0.925566	1.03389	-0.237193	-0.111593	0.0480848	0.617428	0.792503	0.906226
		302.888	16.084	1.20372e+06	1.00734e+06	903266	1.02782e+06	900420	820285	1.03987e+06	921274	955292	1.16031e+06	1.0599e+06	857351	1.20372e+06	6.82	12.08	12.77	16.73	1.10935e+06	977843	1.04727e+06	1.00152e+06	943997	1.10782e+06	983350	1.02364e+06	1.17337e+06	1.17045e+06	899356	1.20372e+06	1.04482e+06	1.01778e+06	1.06012e+06	1.09117e+06	65786.6	83114.1	100127	166951	0.957518	0.932738	0.971542	-0.0626279	-0.100457	-0.041652	0.677726	0.532887	0.796018
		302.869	1.06	7.57335e+06	7.50224e+06	5.47385e+06	5.64601e+06	5.38064e+06	6.49833e+06	5.9458e+06	6.74838e+06	7.57335e+06	7.26598e+06	5.14325e+06	5.43011e+06	6.72729e+06	18.12	9.41	5.79	14.64	8.26193e+06	5.92579e+06	5.75284e+06	5.98479e+06	7.47838e+06	6.33436e+06	7.20309e+06	8.11521e+06	7.34777e+06	5.67968e+06	5.69615e+06	6.72729e+06	6.64685e+06	6.59918e+06	7.55536e+06	6.03437e+06	1.40137e+06	781218	490212	600137	1.1015	1.0936	1.25205	0.139468	0.129083	0.324296	0.524818	0.376897	0.0272852
		301.188	6.099	1.6987e+06	31837.6	259874	201407	37207.1	1.6339e+06	1.6987e+06	31411.7	365446	292404	29851	181511	284648	72.06	83.78	76.43	77.52	35061.5	281331	205217	41384.8	1.88031e+06	1.80971e+06	33528.3	391593	295695	32964.4	190404	284648	173870	1.2438e+06	240272	169339	126092	1.04192e+06	185355	127157	1.02676	7.34505	1.41888	0.0380949	2.87677	0.504756	0.967145	0.150912	0.613725
		301.188	5.501	2.81372e+06	2.81372e+06	37467.4	62944.3	86184.8	28565.5	29328.4	1.49602e+06	261177	525736	2.13226e+06	1.01454e+06	852802	164.26	68.81	85.44	52.26	3.09864e+06	40560.8	64135.3	95861.9	32873.6	31245	1.59682e+06	279864	531654	2.35465e+06	1.06424e+06	852802	1.06778e+06	53326.8	802779	1.4239e+06	1.75882e+06	36845.4	699089	812957	0.7499	0.0374513	0.56379	-0.41523	-4.73884	-0.82677	0.766158	0.0433697	0.372461
		301.188	5.663	2.59947e+06	2.00475e+06	2.17992e+06	2.59947e+06	1.75879e+06	64635.3	659202	1.13254e+06	436066	968792	1.1331e+06	1.74958e+06	1.51069e+06	13.51	103.87	43.06	21.22	2.20775e+06	2.3599e+06	2.64865e+06	1.95627e+06	74383.3	702281	1.20885e+06	467265	979698	1.25128e+06	1.8353e+06	1.51069e+06	2.40543e+06	910979	885271	1.53242e+06	223949	958145	379702	292615	1.56969	0.59447	0.577693	0.650482	-0.750325	-0.791624	0.0148091	0.343133	0.0795287
		301.188	5.961	1.74153e+06	50849.4	1.61574e+06	1.21295e+06	255922	1.67611e+06	1.74153e+06	50851	1.38818e+06	1.13925e+06	38209.3	1.17137e+06	1.38661e+06	84.66	68.55	82.76	83.71	55998.5	1.74915e+06	1.2359e+06	284657	1.92889e+06	1.85534e+06	54277.3	1.4875e+06	1.15207e+06	42194.5	1.22876e+06	1.38661e+06	1.01368e+06	1.3563e+06	897951	885854	868172	928796	749645	734881	1.1443	1.53106	1.01366	0.194464	0.614532	0.0195685	0.855153	0.529278	0.985031
		299.909	16.082	984696	722297	791666	794099	664385	798165	883778	844286	984696	964708	867274	890197	911369	5.3	14.14	8.16	2.48	795438	857029	809124	738984	918541	941533	901175	1.05515e+06	975568	957729	933812	911369	820530	866352	977297	934303	32340.9	110902	77001.6	23183.8	0.878227	0.927271	1.04602	-0.187334	-0.108937	0.0649063	0.00774887	0.357569	0.406844
		299.209	13.356	652592	633582	632397	652592	409945	301295	411942	427943	525748	541087	526782	420625	561232	1.77	16.91	12.32	14.57	697740	684610	664940	455975	346735	438862	456778	563364	547178	581724	441234	561232	682430	413857	522440	528063	16508.4	58755.9	57437.9	75891.3	1.29233	0.783727	0.989352	0.369971	-0.351577	-0.0154447	0.0262317	0.10833	0.92342
		299.209	13.027	2.40872e+06	2.28024e+06	2.15784e+06	2.40872e+06	1.70321e+06	1.60453e+06	1.64585e+06	1.97272e+06	1.70067e+06	2.02594e+06	2.29367e+06	2.12148e+06	2.36633e+06	5.5	3	9.18	5.56	2.51114e+06	2.336e+06	2.45429e+06	1.89445e+06	1.84651e+06	1.75341e+06	2.10565e+06	1.82235e+06	2.04874e+06	2.53289e+06	2.22542e+06	2.36633e+06	2.43381e+06	1.83146e+06	1.99225e+06	2.37488e+06	89347.6	71716.5	149859	153915	1.02482	0.771179	0.838883	0.035364	-0.374862	-0.253458	0.596972	0.00518007	0.0367491
	C15 H22 O6	298.141	14.17	6.0837e+06	5.41318e+06	5.52693e+06	6.0837e+06	4.81449e+06	5.64698e+06	5.14753e+06	4.00174e+06	3.9356e+06	4.51351e+06	4.33402e+06	4.58983e+06	4.71492e+06	6.32	8.05	7.62	4.27	5.96133e+06	5.98325e+06	6.1988e+06	5.35508e+06	6.49863e+06	5.48392e+06	4.27138e+06	4.21718e+06	4.56432e+06	4.78605e+06	4.8147e+06	4.71492e+06	6.0478e+06	5.77921e+06	4.35096e+06	4.77189e+06	131236	626358	186753	51377.7	1.26738	1.21109	0.91179	0.341848	0.27631	-0.133227	9.66107e-05	0.0500137	0.0197049
		297.908	16.086	1.3493e+06	1.00292e+06	1.06743e+06	1.06491e+06	975230	1.02812e+06	1.02048e+06	1.19457e+06	1.06727e+06	1.3493e+06	1.21264e+06	1.17581e+06	1.28282e+06	3.5	2.84	11.73	4.44	1.10448e+06	1.15556e+06	1.08506e+06	1.08473e+06	1.18317e+06	1.08717e+06	1.27506e+06	1.14363e+06	1.36449e+06	1.33912e+06	1.23342e+06	1.28282e+06	1.11503e+06	1.11836e+06	1.26106e+06	1.28512e+06	36418	56143.2	111094	52886.4	0.867648	0.870236	0.981278	-0.204818	-0.200522	-0.0272662	0.0101227	0.020036	0.75187
	C15 H20 O6	296.125	13.798	605222	431221	605222	318246	416899	375014	394900	271785	249891	338226	311860	350695	319703	32.01	5.3	16.05	6.27	474887	655192	324268	463709	431572	420707	290098	267770	342034	344386	367877	319703	484782	438663	299967	343989	165684	22360.7	38103	24089.2	1.4093	1.27522	0.872027	0.494976	0.350752	-0.197556	0.218964	0.00754843	0.166018
	C15 H20 O6	296.125	15.526	7.58662e+06	1.6731e+06	1.29751e+06	1.80314e+06	6.80934e+06	6.54689e+06	7.58662e+06	5.72036e+06	581052	741600	5.9194e+06	6.60674e+06	7.24452e+06	16.5	7.75	124.46	10.06	1.84252e+06	1.40464e+06	1.83726e+06	7.57391e+06	7.53426e+06	8.08241e+06	6.1058e+06	622625	749949	6.53678e+06	6.93043e+06	7.24452e+06	1.69481e+06	7.73019e+06	2.49279e+06	6.90391e+06	251306	305670	3.12961e+06	354612	0.245485	1.11968	0.36107	-2.02629	0.163091	-1.46965	3.18166e-05	0.0377715	0.0723108
		296.125	14.031	989840	989840	882757	561785	664576	305191	774032	747646	353347	902706	363174	884498	788259	27.45	42.2	42.41	40.88	1.09007e+06	955640	572414	739196	351219	824615	798024	378629	912867	401052	927833	788259	872709	638343	696506	705715	268609	252298	281215	272919	1.23663	0.904535	0.986952	0.306415	-0.144753	-0.0189482	0.492084	0.769242	0.969486
	C17 H26 O4	294.184	15.218	2.15639e+06	509342	311693	827537	420166	627873	893962	1.02137e+06	2.0931e+06	2.15639e+06	490821	2.13251e+06	1.32944e+06	47.36	36.69	36.3	62.3	560919	337428	843194	467343	722566	952382	1.09019e+06	2.24286e+06	2.18066e+06	542013	2.23699e+06	1.32944e+06	580514	714097	1.8379e+06	1.36948e+06	253452	242630	648282	848198	0.423893	0.521436	1.34204	-1.23823	-0.939438	0.424431	0.197547	0.267613	0.489596
	C17 H26 O4	294.183	14.794	3.09918e+06	2.34228e+06	2.42077e+06	2.7859e+06	2.43779e+06	2.78161e+06	3.09918e+06	2.1784e+06	64229.5	361673	2.36527e+06	135424	1.73553e+06	9.41	11.93	131.83	81.41	2.57946e+06	2.62064e+06	2.83861e+06	2.71152e+06	3.20113e+06	3.30171e+06	2.32519e+06	68825	365745	2.61196e+06	142059	1.73553e+06	2.67957e+06	3.07145e+06	919919	1.49652e+06	139263	315744	1.22602e+06	1.25218e+06	1.79054	2.0524	0.614707	0.840393	1.03731	-0.70203	0.17919	0.102216	0.599236
		293.931	1.321	2.1525e+07	1.8384e+07	1.78923e+07	1.99113e+07	1.96821e+07	1.91894e+07	2.10498e+07	1.86423e+07	1.94613e+07	2.02506e+07	1.89147e+07	1.93819e+07	2.1525e+07	5.62	4.83	4.13	6.98	2.02456e+07	1.93696e+07	2.0288e+07	2.1892e+07	2.20835e+07	2.24254e+07	1.98984e+07	2.08537e+07	2.04786e+07	2.08874e+07	2.03315e+07	2.1525e+07	1.99678e+07	2.21336e+07	2.04102e+07	2.09147e+07	518454	270193	481301	597209	0.954725	1.05828	0.975882	-0.0668436	0.0817254	-0.0352221	0.106764	0.0322502	0.318251
		292.859	16.082	1.67166e+06	1.0806e+06	1.02921e+06	1.3152e+06	954126	1.08936e+06	1.16966e+06	855276	1.05853e+06	1.44845e+06	1.03904e+06	879921	1.67166e+06	13.35	10.17	26.9	34.99	1.19002e+06	1.11418e+06	1.34008e+06	1.06126e+06	1.25365e+06	1.2461e+06	912905	1.13426e+06	1.46475e+06	1.14741e+06	923032	1.67166e+06	1.21476e+06	1.187e+06	1.17064e+06	1.24737e+06	114964	108962	277716	384191	0.97386	0.951606	0.938488	-0.0382134	-0.0715643	-0.0915896	0.894813	0.80639	0.793118
	C15 H16 O6	292.098	16.798	746206	605221	569737	596965	534025	458316	470768	746206	660988	681900	546701	464313	490136	3.14	8.32	6.38	8.42	666506	616776	608260	593987	527437	501532	796486	708281	689576	603721	487062	490136	630514	540985	731447	526973	31459.7	47693.2	57096	66483.4	1.19648	1.02659	1.38802	0.258801	0.0378613	0.473026	0.0713393	0.781513	0.0155874
		291.951	1.527	4.26753e+06	3.93385e+06	4.09443e+06	2.7602e+06	4.2518e+06	3.98166e+06	4.26753e+06	3.83126e+06	3.64402e+06	3.80291e+06	3.56991e+06	2.76964e+06	3.59737e+06	20.25	3.86	2.68	14.19	4.33219e+06	4.43248e+06	2.81242e+06	4.72921e+06	4.58216e+06	4.54641e+06	4.08941e+06	3.90475e+06	3.84572e+06	3.94224e+06	2.90533e+06	3.59737e+06	3.85903e+06	4.61926e+06	3.94663e+06	3.48165e+06	907776	96881.6	127131	528049	1.10839	1.32674	1.13355	0.148469	0.407891	0.18085	0.567395	0.0213872	0.21227
		287.96	1.574	3.03297e+07	8.52928e+06	5.27406e+06	6.55254e+06	6.06208e+06	5.85013e+06	5.42007e+06	2.39959e+07	5.7973e+06	2.63605e+07	3.03297e+07	1.82678e+06	9.33299e+06	24.17	5.66	60.11	106.83	9.39297e+06	5.7095e+06	6.67652e+06	6.74275e+06	6.73242e+06	5.77427e+06	2.56128e+07	6.21209e+06	2.66573e+07	3.3493e+07	1.91629e+06	9.33299e+06	7.25966e+06	6.41648e+06	1.9494e+07	1.49141e+07	1.90972e+06	556198	1.15144e+07	1.65116e+07	0.486766	0.43023	1.30709	-1.0387	-1.21682	0.386358	0.469758	0.423335	0.713631
	C21 H18 O	286.134	16.902	1.23231e+06	1.11939e+06	1.00291e+06	1.23231e+06	741059	742757	761669	584010	567101	553370	874074	817569	875992	10.26	1.53	2.7	3.88	1.23274e+06	1.08572e+06	1.25562e+06	824267	854776	811443	623361	607676	559599	965237	857625	875992	1.19136e+06	830162	596878	899618	92203.5	22259.7	33223.9	57565.2	1.3243	0.922794	0.66348	0.405225	-0.115919	-0.591876	0.00967034	0.123074	0.00139591
		285.972	16.826	2.70303e+06	1.03715e+06	1.01406e+06	902153	2.70303e+06	2.47411e+06	2.26651e+06	2.50047e+06	2.06089e+06	1.92966e+06	2.09656e+06	1.53883e+06	1.80407e+06	7.33	8.8	13.82	15.39	1.14217e+06	1.09778e+06	919223	3.00653e+06	2.84725e+06	2.41463e+06	2.66895e+06	2.20834e+06	1.95139e+06	2.31523e+06	1.61422e+06	1.80407e+06	1.05306e+06	2.75614e+06	2.27623e+06	1.91118e+06	118012	306288	363569	362568	0.551001	1.44212	1.19101	-0.859873	0.528187	0.252184	0.01757	0.0368052	0.28561
		273.266	16.347	488113	480887	431483	463023	474941	406766	432466	434494	408333	400236	488113	430092	434521	5.46	7.86	4.32	7.16	529583	467108	471783	528269	468113	460728	463770	437549	404742	539022	451164	434521	489491	485703	435354	474902	34798.8	37047.6	29575.4	56149.3	1.03072	1.02274	0.916723	0.0436522	0.032444	-0.125443	0.721532	0.794721	0.341155
		270.139	18.316	4.41341e+06	3.71272e+06	3.52369e+06	4.41341e+06	1.90293e+06	1.65194e+06	2.29805e+06	2.23923e+06	1.84205e+06	2.6894e+06	2.64673e+06	2.42148e+06	2.83293e+06	12.07	16.7	18.78	7.82	4.08868e+06	3.81462e+06	4.49691e+06	2.11659e+06	1.90108e+06	2.44822e+06	2.39011e+06	1.97385e+06	2.71967e+06	2.92278e+06	2.54012e+06	2.83293e+06	4.1334e+06	2.1553e+06	2.36121e+06	2.76527e+06	343338	275620	373753	200100	1.49475	0.779415	0.853879	0.579908	-0.359536	-0.227896	0.00397141	0.036153	0.174121
		269.995	15.493	1.36536e+06	620133	551566	705587	1.29043e+06	1.32271e+06	1.30502e+06	1.36536e+06	412370	1.25388e+06	1.05892e+06	1.02583e+06	1.1565e+06	12.33	1.24	51.56	6.29	682928	597106	718938	1.43532e+06	1.5222e+06	1.3903e+06	1.45736e+06	441875	1.268e+06	1.16936e+06	1.07609e+06	1.1565e+06	666324	1.44927e+06	1.05575e+06	1.13398e+06	62590.3	67048.7	539994	50546.3	0.587596	1.27804	0.931007	-0.767103	0.353932	-0.103137	0.00054739	0.00288383	0.815005
		266.155	17.048	1.52064e+07	1.12238e+07	1.05784e+07	1.19808e+07	1.18302e+07	1.11659e+07	1.31776e+07	1.17857e+07	1.17737e+07	1.29202e+07	1.24122e+07	1.52064e+07	1.5106e+07	6.23	8.5	5.42	11.13	1.23603e+07	1.14518e+07	1.22075e+07	1.31585e+07	1.28499e+07	1.40388e+07	1.25798e+07	1.26161e+07	1.30657e+07	1.37067e+07	1.59514e+07	1.5106e+07	1.20065e+07	1.33491e+07	1.27538e+07	1.49214e+07	486462	616925	270655	1.13367e+06	0.804654	0.894627	0.854737	-0.31356	-0.160642	-0.226448	0.0149448	0.102489	0.0322479
	C15 H22 O4	266.151	17.38	4.82128e+06	1.37396e+06	1.43355e+06	1.50179e+06	212165	200168	217337	4.37679e+06	4.5263e+06	4.82128e+06	421586	440686	450146	4.45	4.2	4.94	3.33	1.51309e+06	1.55191e+06	1.5302e+06	235988	230356	231540	4.6717e+06	4.85015e+06	4.87556e+06	465556	462277	450146	1.53173e+06	232628	4.79913e+06	459326	19456.3	2969.14	111092	8117.73	3.33473	0.506455	10.4482	1.73757	-0.981495	3.38518	9.94807e-08	1.40446e-06	2.88899e-07
		261.899	1.258	2.19169e+07	1.54072e+07	1.70161e+07	1.86662e+07	1.44066e+07	1.80593e+07	2.14099e+07	1.99623e+07	1.50212e+07	2.00588e+07	1.52353e+07	1.92859e+07	2.19169e+07	9.57	19.5	15.7	17.89	1.69674e+07	1.8421e+07	1.90194e+07	1.60243e+07	2.07829e+07	2.28091e+07	2.13074e+07	1.60959e+07	2.02846e+07	1.68244e+07	2.02308e+07	2.19169e+07	1.81359e+07	1.98721e+07	1.92293e+07	1.96573e+07	1.05526e+06	3.48291e+06	2.76135e+06	2.59425e+06	0.922603	1.01092	0.978225	-0.116219	0.0156743	-0.0317614	0.400022	0.935867	0.854403
		255.842	12.359	590746	515751	539863	588309	471014	476628	493228	454929	382420	486007	529793	544163	590746	6.74	2.4	12.05	5.74	567977	584436	599440	523901	548511	525460	485582	409781	491478	585049	570824	590746	583951	532624	462281	582206	15737.1	13780.6	45561.1	10260.8	1.003	0.914837	0.794015	0.00431651	-0.128414	-0.332762	0.880016	0.00749839	0.0112667
		255.012	0.22	2.16662e+06	2.16662e+06	332992	1.31099e+06	1.29074e+06	340215	393429	1.44546e+06	397000	460800	489288	342403	1.13719e+06	72.23	79.15	76.56	64.44	2.38602e+06	360485	1.3358e+06	1.43567e+06	391525	419139	1.54286e+06	425405	465987	540320	359178	1.13719e+06	1.36077e+06	748777	811417	678897	1.013e+06	595025	633773	407098	2.00438	1.10293	1.1952	1.00316	0.141345	0.257252	0.340205	0.874822	0.775776
	C14 H22 O4	254.151	18.058	1.07231e+06	1.03878e+06	953041	1.07231e+06	922653	805304	962928	941508	879769	1.03988e+06	935449	952438	933204	6.02	9.13	8.47	1.12	1.14396e+06	1.03173e+06	1.09259e+06	1.02625e+06	926757	1.02585e+06	1.00495e+06	942715	1.05158e+06	1.03301e+06	999102	933204	1.08943e+06	992954	999749	988440	56185.1	57329	54620.6	50751.6	1.10217	1.00457	1.01144	0.140347	0.00657397	0.0164125	0.0820077	0.923575	0.805749
		245.923	1.528	6.39843e+06	4.46968e+06	2.16211e+06	3.08393e+06	6.39843e+06	2.96045e+06	3.4092e+06	3.37981e+06	2.58471e+06	3.13318e+06	4.42739e+06	2.20491e+06	5.306e+06	35.87	43.91	13.42	40.16	4.92229e+06	2.34062e+06	3.14228e+06	7.11687e+06	3.40693e+06	3.63199e+06	3.60754e+06	2.76964e+06	3.16845e+06	4.88916e+06	2.31294e+06	5.306e+06	3.4684e+06	4.71859e+06	3.18187e+06	4.16937e+06	1.32137e+06	2.08001e+06	419113	1.62116e+06	0.831876	1.13173	0.763155	-0.265559	0.178529	-0.389951	0.592703	0.736548	0.364789
		244.066	1.056	1.27963e+06	956554	771600	875855	317457	338279	337215	1.19145e+06	1.11554e+06	1.27963e+06	211451	234992	242178	10.68	3.54	6.87	7	1.05342e+06	835305	892427	353102	389297	359252	1.27173e+06	1.19535e+06	1.29403e+06	233505	246505	242178	927049	367217	1.25371e+06	240729	113102	19367.2	51749.5	6620.13	3.851	1.52543	5.20794	1.94523	0.60922	2.38071	0.000466449	0.000431635	4.66318e-06
		243.183	16.154	1.03469e+06	942912	983676	1.03469e+06	780270	653574	858527	792080	700559	881110	899087	834155	981112	4.66	13.54	11.41	8.14	1.03839e+06	1.06489e+06	1.05426e+06	867880	752143	914631	845451	750683	891028	992859	875024	981112	1.05252e+06	844885	829054	949665	13335.6	83649	71594.9	64907.4	1.1083	0.889666	0.872996	0.148352	-0.168664	-0.195952	0.0547475	0.161665	0.0967015
		241.276	17.829	2.71704e+06	2.43692e+06	2.71704e+06	188730	2.20697e+06	2.41434e+06	127922	2.44157e+06	1.57549e+06	107902	2.25397e+06	1.20414e+06	115541	77.82	79.87	85.8	89.76	2.68368e+06	2.94136e+06	192301	2.45478e+06	2.77846e+06	136282	2.60609e+06	1.68822e+06	109117	2.48905e+06	1.26313e+06	115541	1.93912e+06	1.78984e+06	1.46781e+06	1.28924e+06	1.51826e+06	1.44114e+06	1.26299e+06	1.18697e+06	1.50407	1.38829	1.1385	0.588876	0.473308	0.187139	0.590523	0.666506	0.867047
		239.917	1.251	1.97272e+07	1.45161e+07	1.58255e+07	1.68975e+07	1.32396e+07	1.65504e+07	1.85802e+07	1.67921e+07	1.38234e+07	1.84718e+07	1.43831e+07	1.75605e+07	1.97272e+07	7.57	16.72	14.39	15.61	1.5986e+07	1.71321e+07	1.72172e+07	1.47262e+07	1.90465e+07	1.97944e+07	1.79236e+07	1.48124e+07	1.86797e+07	1.58833e+07	1.84209e+07	1.97272e+07	1.67784e+07	1.78557e+07	1.71386e+07	1.80105e+07	687577	2.7359e+06	2.04969e+06	1.95456e+06	0.931595	0.991406	0.951591	-0.102226	-0.0124521	-0.0715858	0.36126	0.94028	0.622153
		239.043	19.324	1.3804e+07	2.41025e+06	2.1606e+06	2.10584e+06	6.74328e+06	1.14001e+06	4.7362e+06	7.85942e+06	3.5156e+06	7.09342e+06	1.3804e+07	9.08782e+06	1.11306e+07	7.29	67.49	37.66	20.85	2.65432e+06	2.33898e+06	2.14568e+06	7.50043e+06	1.31194e+06	5.04571e+06	8.389e+06	3.76714e+06	7.17327e+06	1.52437e+07	9.53307e+06	1.11306e+07	2.37966e+06	4.61936e+06	6.44314e+06	1.19691e+07	256746	3.1162e+06	2.39588e+06	2.94623e+06	0.198817	0.38594	0.538313	-2.33049	-1.37355	-0.893482	0.00494009	0.0412071	0.0653246
		231.997	0.219	4.57295e+06	4.57295e+06	3.44348e+06	1.1168e+06	883339	2.12853e+06	1.28078e+06	3.14077e+06	2.36523e+06	1.07085e+06	922567	2.55797e+06	1.05082e+06	57.89	44.45	47.7	60.21	5.03602e+06	3.72778e+06	1.13793e+06	982523	2.44954e+06	1.36448e+06	3.3524e+06	2.53446e+06	1.0829e+06	1.01879e+06	2.68329e+06	1.05082e+06	3.30058e+06	1.59885e+06	2.32325e+06	1.5843e+06	1.98384e+06	761073	1.1494e+06	951890	2.0833	1.00918	1.46642	1.05887	0.0131887	0.552301	0.248065	0.984493	0.439447
		230.015	1.053	781371	781371	477927	485032	608169	567814	537525	765452	732596	628900	626973	701497	506321	29.78	6.2	10.05	16.1	860494	517387	494209	676455	653449	572653	817029	785012	635980	692365	735866	506321	624030	634186	746007	644851	205111	54516.7	96621.7	121926	0.967712	0.983461	1.15687	-0.0473501	-0.0240596	0.210224	0.887186	0.896681	0.32306
		229.909	1.543	2.40063e+07	2.35179e+07	1.49444e+07	1.17703e+07	2.38696e+07	1.69593e+07	1.85855e+07	2.40063e+07	1.54509e+07	1.94503e+07	2.38742e+07	6.15324e+06	1.92577e+07	36.29	18.24	21.8	55.96	2.58994e+07	1.61783e+07	1.1993e+07	2.65498e+07	1.9517e+07	1.98001e+07	2.56239e+07	1.65564e+07	1.96692e+07	2.63642e+07	6.45471e+06	1.92577e+07	1.80236e+07	2.19556e+07	20616518	1.73589e+07	7.13448e+06	3.98116e+06	4.60737e+06	10089641	1.03829	1.26481	1.18767	0.0542113	0.338918	0.248128	0.930251	0.503634	0.637736
		229.24	17.243	1.7113e+07	1.68874e+07	1.54484e+07	1.54166e+07	1.7113e+07	1.41512e+07	1.47334e+07	1.54666e+07	1.34567e+07	1.39387e+07	1.6089e+07	1.43936e+07	1.45407e+07	5.28	10.23	7.34	6.26	1.85974e+07	1.67238e+07	1.57083e+07	1.90345e+07	1.62855e+07	1.56963e+07	1.65087e+07	1.44195e+07	1.40956e+07	1.7767e+07	1.50988e+07	1.45407e+07	1.70099e+07	1.70054e+07	1.50079e+07	1.58022e+07	1.46562e+06	1.78178e+06	1.30978e+06	1.72432e+06	1.07642	1.07614	0.949739	0.106247	0.10587	-0.0743973	0.407636	0.447933	0.559759
		229.167	15.492	6.48115e+06	6.16749e+06	6.22503e+06	6.48115e+06	4.65489e+06	4.58503e+06	5.03977e+06	4.48101e+06	4.51225e+06	4.92795e+06	5.40208e+06	5.34634e+06	5.73076e+06	2.65	5.14	5.38	3.78	6.79202e+06	6.73899e+06	6.60378e+06	5.17755e+06	5.27652e+06	5.36912e+06	4.78294e+06	4.8351e+06	4.98342e+06	5.9655e+06	5.60828e+06	5.73076e+06	6.7116e+06	5.2744e+06	4.86715e+06	5.76818e+06	97066.3	95801.7	104014	181525	1.16356	0.914396	0.843794	0.218539	-0.12911	-0.245038	0.00136356	0.0140674	0.00172582
		228.017	1.054	1.70635e+06	1.15782e+06	746610	787361	997600	1.08404e+06	829216	1.14209e+06	1.16468e+06	870054	1.0061e+06	1.70635e+06	872259	25.25	13.36	15.48	37.49	1.27506e+06	808252	802258	1.10961e+06	1.24752e+06	883405	1.21905e+06	1.24801e+06	879848	1.11103e+06	1.78995e+06	872259	961856	1.08018e+06	1.11563e+06	1.25775e+06	271258	183835	204710	476111	0.764746	0.858822	0.88701	-0.386948	-0.219568	-0.172977	0.402594	0.579266	0.659592
		226.02	1.057	1.92441e+06	1.92441e+06	1.19043e+06	1.45072e+06	1.73664e+06	1.90126e+06	1.47221e+06	1.82684e+06	1.839e+06	1.54247e+06	1.66342e+06	1.82422e+06	1.29997e+06	24.45	12.71	9.67	16.83	2.11928e+06	1.28872e+06	1.47817e+06	1.93163e+06	2.188e+06	1.56841e+06	1.94994e+06	1.97058e+06	1.55984e+06	1.83691e+06	1.9136e+06	1.29997e+06	1.62872e+06	1.89602e+06	1.82678e+06	1.68349e+06	435266	311326	231413	334346	0.967465	1.12624	1.08512	-0.0477186	0.171513	0.117848	0.871165	0.465566	0.574596
		225.172	16.143	1.20016e+06	1.0766e+06	1.14613e+06	1.15538e+06	860947	1.0358e+06	1.09101e+06	924064	950362	1.03394e+06	1.03279e+06	1.20016e+06	1.11982e+06	3.82	12.06	5.92	7.49	1.18562e+06	1.24076e+06	1.17724e+06	957616	1.19201e+06	1.1623e+06	986328	1.01836e+06	1.04558e+06	1.1405e+06	1.25897e+06	1.11982e+06	1.2012e+06	1.10398e+06	1.01676e+06	1.1731e+06	34510.5	127619	29657.9	75081.4	1.02396	0.94108	0.866728	0.0341601	-0.0876109	-0.206349	0.587417	0.464127	0.0284521
		224.188	18.003	781647	488745	498523	531436	221220	183741	203274	751511	668835	781647	603419	569690	577639	4.42	9.25	7.96	3.02	538236	539683	541491	246059	211452	216558	802148	716689	790446	666354	597602	577639	539803	224690	769761	613865	1630.77	18681.7	46333	46539.5	0.879351	0.366025	1.25396	-0.185488	-1.44999	0.326489	0.0511292	0.000177224	0.0147117
		219.138	3.246	1.00173e+06	43254.3	241956	83298.6	182947	1.00173e+06	814579	69364.3	333183	112616	115817	351538	105748	85.55	64.38	82.4	72.81	47634.3	261933	84874.7	203489	1.15281e+06	867812	74038.2	357022	113883	127896	368761	105748	131481	741370	181648	200802	114499	487127	153179	145878	0.654778	3.69205	0.904612	-0.610923	1.88442	-0.144629	0.552623	0.139392	0.88297
		219.138	3.016	1.09117e+06	1.08592e+06	1.05863e+06	1.07216e+06	1.06807e+06	409651	651485	458268	285163	396239	1.09117e+06	959369	993410	1.27	46.93	23.09	6.74	1.19588e+06	1.14604e+06	1.09245e+06	1.188e+06	471433	694060	489146	305565	400699	1.20497e+06	1.00637e+06	993410	1.14479e+06	784496	398470	1.06825e+06	51726.9	366742	91810.7	118582	1.07164	0.734374	0.373012	0.0998261	-0.445413	-1.42271	0.363452	0.271293	0.00150415
		218.087	16.638	923607	832010	793354	774129	923607	905530	873016	702809	707216	632387	844321	655696	654005	3.69	2.85	6.17	15.24	916261	858856	788776	1.02731e+06	1.0421e+06	930068	750165	757816	639506	932382	687821	654005	854631	999826	715829	758069	63847	60862.9	66208.4	151903	1.12738	1.31891	0.944279	0.172971	0.399347	-0.0827152	0.367503	0.062715	0.681651
		217.935	1.284	8.80762e+07	7.63554e+07	7.50365e+07	8.03462e+07	8.80762e+07	7.67299e+07	8.42632e+07	6.91353e+07	7.32179e+07	7.87404e+07	7.03696e+07	7.43955e+07	8.05392e+07	3.58	6.95	6.54	6.82	8.40873e+07	8.12318e+07	8.18664e+07	9.79657e+07	8.83019e+07	8.97698e+07	7.37937e+07	7.84565e+07	7.96267e+07	7.7709e+07	7.80404e+07	8.05392e+07	8.23951e+07	9.20125e+07	7.72923e+07	7.87629e+07	1.4994e+06	5.2076e+06	3.08588e+06	1.54722e+06	1.04612	1.16822	0.981329	0.0650438	0.224314	-0.0271908	0.0432434	0.013431	0.50155
		217.935	1.586	3.1531e+07	2.08066e+07	2.84727e+07	2.82714e+07	2.53393e+07	2.82722e+07	2.9605e+07	2.94461e+07	3.1531e+07	2.72802e+07	2.6841e+07	3.10078e+07	2.68301e+07	16.9	7.87	7.23	8.53	2.29135e+07	3.08235e+07	2.88063e+07	2.81845e+07	3.2536e+07	3.15396e+07	3.14302e+07	3.3787e+07	2.75872e+07	2.96405e+07	3.2527e+07	2.68301e+07	2.75144e+07	3.07534e+07	3.09348e+07	2.96659e+07	4.11018e+06	2.27984e+06	3.12941e+06	2.84854e+06	0.927477	1.03666	1.04277	-0.108616	0.0519405	0.0604265	0.497573	0.632898	0.630914
		216.025	1.051	1.32198e+06	1.32198e+06	1.12769e+06	1.20624e+06	988930	986614	824976	1.08909e+06	1.16204e+06	1.19626e+06	994555	962749	1.0816e+06	8.02	10.07	4.76	6.07	1.45585e+06	1.2208e+06	1.22906e+06	1.09997e+06	1.13541e+06	878888	1.16247e+06	1.24518e+06	1.20972e+06	1.09828e+06	1.00992e+06	1.0816e+06	1.3019e+06	1.03809e+06	1.20579e+06	1.06327e+06	133384	139007	41496.8	46949.8	1.22443	0.976319	1.13404	0.292114	-0.0345751	0.181474	0.0431154	0.781081	0.0169651
		215.152	14.88	1.72002e+06	1.47369e+06	1.63746e+06	1.72002e+06	1.15442e+06	1.09646e+06	1.26863e+06	1.06212e+06	990297	1.1635e+06	1.24405e+06	1.38177e+06	1.41552e+06	7.79	7.47	8.12	6.74	1.62292e+06	1.77265e+06	1.75256e+06	1.28404e+06	1.26182e+06	1.35154e+06	1.13368e+06	1.06115e+06	1.1766e+06	1.3738e+06	1.44947e+06	1.41552e+06	1.71604e+06	1.29913e+06	1.12381e+06	1.41293e+06	81269.5	46726	58352.4	37899.7	1.21453	0.91946	0.795376	0.280398	-0.121141	-0.330292	0.00424656	0.0306131	0.0019752
		207.939	1.048	2.74643e+06	2.20899e+06	2.55376e+06	2.42918e+06	2.02169e+06	2.35209e+06	2.45814e+06	2.13779e+06	2.41143e+06	2.74643e+06	2.12535e+06	2.33248e+06	2.58047e+06	7.28	10	12.53	9.71	2.43268e+06	2.76461e+06	2.47514e+06	2.2487e+06	2.70682e+06	2.61878e+06	2.28184e+06	2.58397e+06	2.77734e+06	2.34701e+06	2.44676e+06	2.58047e+06	2.55748e+06	2.52477e+06	2.54772e+06	2.45808e+06	180632	243102	249734	117140	1.04044	1.02713	1.03646	0.0571872	0.0386163	0.0516708	0.468714	0.690683	0.603608
		207	1.043	1.60826e+06	1.26874e+06	924990	1.11815e+06	1.16922e+06	1.39342e+06	1.36146e+06	1.17048e+06	1.60826e+06	1.20796e+06	1.11981e+06	1.46149e+06	1.09276e+06	15.61	9.27	18.26	16.78	1.39722e+06	1.00136e+06	1.1393e+06	1.30051e+06	1.60357e+06	1.45043e+06	1.24935e+06	1.72333e+06	1.22156e+06	1.23661e+06	1.53309e+06	1.09276e+06	1.17929e+06	1.4515e+06	1.39808e+06	1.28749e+06	200935	151535	282019	224530	0.915965	1.12739	1.0859	-0.126636	0.172989	0.118887	0.567675	0.353484	0.623303
		205.94	1.051	5.06281e+06	4.08055e+06	4.56655e+06	4.42709e+06	3.60599e+06	4.40056e+06	4.47881e+06	3.93061e+06	4.3111e+06	5.06281e+06	3.82639e+06	4.1642e+06	4.61933e+06	5.74	11.6	12.99	9.47	4.49375e+06	4.94358e+06	4.51085e+06	4.01088e+06	5.06423e+06	4.77149e+06	4.19546e+06	4.61955e+06	5.1198e+06	4.22547e+06	4.36822e+06	4.61933e+06	4.6494e+06	4.61554e+06	4.64494e+06	4.40434e+06	254917	543720	462697	199399	1.05564	1.04795	1.05463	0.0781177	0.0675726	0.0767339	0.259903	0.561919	0.454657
		205.001	1.054	3.68536e+06	3.04677e+06	2.33972e+06	1.86343e+06	2.80273e+06	3.29035e+06	1.748e+06	2.0195e+06	3.68536e+06	1.88235e+06	2.69885e+06	3.38376e+06	2.62988e+06	24.64	30.16	39.69	14.35	3.35529e+06	2.53289e+06	1.89868e+06	3.11743e+06	3.78659e+06	1.86223e+06	2.15558e+06	3.94904e+06	1.90354e+06	2.98034e+06	3.54955e+06	2.62988e+06	2.59562e+06	2.92208e+06	2.66939e+06	3.05326e+06	730324	976939	1.11535e+06	464147	0.850116	0.957038	0.874275	-0.234268	-0.0633515	-0.193841	0.411495	0.843887	0.611358
		203.943	1.049	3.20358e+06	2.79861e+06	3.16262e+06	2.86255e+06	2.33843e+06	2.80261e+06	3.04504e+06	2.7327e+06	2.79755e+06	3.20358e+06	2.6792e+06	2.81092e+06	3.1433e+06	6.61	13.16	8.77	8.31	3.082e+06	3.42373e+06	2.91671e+06	2.601e+06	3.22529e+06	3.24404e+06	2.91683e+06	2.99771e+06	3.23964e+06	2.95863e+06	2.94864e+06	3.1433e+06	3.14082e+06	3.02344e+06	3.05139e+06	3.01686e+06	258575	365968	167969	109616	1.04109	1.00218	1.01145	0.058093	0.00314546	0.0164219	0.487193	0.977614	0.780369
		203.004	1.051	3.74424e+06	3.14412e+06	2.67105e+06	2.98433e+06	2.89075e+06	3.64758e+06	2.85177e+06	3.25879e+06	3.67203e+06	3.36711e+06	3.03984e+06	3.74424e+06	2.74494e+06	8.2	14.33	6.24	16.16	3.4625e+06	2.89158e+06	3.0408e+06	3.21533e+06	4.19769e+06	3.03813e+06	3.47837e+06	3.93476e+06	3.40501e+06	3.35689e+06	3.92768e+06	2.74494e+06	3.13163e+06	3.48372e+06	3.60605e+06	3.34317e+06	296095	624634	287023	591488	0.936724	1.04204	1.07863	-0.0943046	0.0594104	0.109202	0.609132	0.791233	0.526698
		201.926	1.08	875560	714904	791275	779074	701065	761590	762387	823834	845066	875560	706617	733310	747223	5.39	4.74	3.07	2.83	787296	856605	793815	779782	876449	812209	879345	905529	885416	780315	769238	747223	812572	822813	890097	765592	38272.9	49198.3	13705.1	16844.5	1.06136	1.07474	1.16263	0.0859199	0.103989	0.217386	0.123529	0.129358	0.000577366
		201.136	14.253	737946	644215	702961	737946	459247	490897	576487	453529	444986	492780	558187	593457	566562	6.81	11.92	5.5	3.22	709449	761000	751909	510813	564932	614161	484088	476824	498327	616404	622533	566562	740786	563302	486413	601833	27516.4	51693.4	10938.5	30699	1.23088	0.935977	0.808219	0.299693	-0.0954554	-0.307182	0.0042915	0.329212	0.00357951
		199.929	1.081	2.23454e+06	1.20648e+06	2.00668e+06	1.99892e+06	1.76834e+06	1.21774e+06	2.01023e+06	1.33202e+06	2.13475e+06	2.23454e+06	1.14128e+06	1.22354e+06	1.94924e+06	26.46	24.39	26.04	30.92	1.32864e+06	2.17236e+06	2.03674e+06	1.9669e+06	1.40139e+06	2.1416e+06	1.42177e+06	2.28749e+06	2.2597e+06	1.26032e+06	1.28348e+06	1.94924e+06	1.84591e+06	1.83663e+06	1.98965e+06	1.49768e+06	453071	386916	491995	391235	1.23252	1.22632	1.32849	0.301606	0.294331	0.409785	0.370654	0.346115	0.246712
		197.048	1.055	923938	840860	732223	889375	637386	632568	666587	814418	923938	921173	674462	809368	772729	9.8	2.85	7.04	9.27	926007	792678	906203	708954	727969	710148	869294	990044	931542	744807	849022	772729	874963	715690	930293	788853	71945.1	10650.4	60384.6	53946	1.10916	0.907255	1.1793	0.149466	-0.14042	0.23793	0.172537	0.0825253	0.0389516
		193.009	1.052	865296	691630	718643	760165	552888	686424	690434	711659	865296	747226	569184	693667	712500	4.77	12.17	10.38	11.83	761666	777977	774548	614968	789947	735554	759611	927207	755637	628549	727653	712500	771397	713489	814152	689567	8600.18	89552	97928.6	53383.7	1.11867	1.03469	1.18067	0.161782	0.0492009	0.239606	0.0587258	0.711347	0.125135
		191.969	1.056	1.30035e+07	1.30035e+07	7.72074e+06	8.16367e+06	1.19827e+07	7.51916e+06	7.92903e+06	8.3753e+06	8.68006e+06	9.23574e+06	1.22724e+07	1.16768e+07	8.44518e+06	30.43	26.98	4.98	19.07	14320233	8.35818e+06	8.31813e+06	1.33282e+07	8.65317e+06	8.44719e+06	8.93964e+06	9.3011e+06	9.33971e+06	1.35524e+07	1.22489e+07	8.44518e+06	1.03322e+07	1.01428e+07	9.19348e+06	1.14155e+07	3.45381e+06	2.76049e+06	220683	2.65365e+06	0.905102	0.888516	0.805352	-0.143848	-0.170531	-0.312309	0.688816	0.595677	0.221886
		191.935	0.166	1.30596e+06	1.2399e+06	1.27465e+06	359978	1.09552e+06	990829	1.30596e+06	1.1855e+06	1.01001e+06	1.10243e+06	1.00935e+06	938095	94248.6	54.1	14.19	7.99	74.79	1.36546e+06	1.37988e+06	366789	1.21853e+06	1.14026e+06	1.3913e+06	1.26538e+06	1.08227e+06	1.11484e+06	1.11463e+06	984057	94248.6	1.03738e+06	1.25003e+06	1.15416e+06	730977	580790	128451	97685.8	555274	1.41916	1.71008	1.57893	0.505041	0.774066	0.658949	0.545051	0.189836	0.263431
	C14 H22	190.172	17.309	3.72779e+06	3.72779e+06	3.39526e+06	3.00628e+06	1.66147e+06	1.44568e+06	1.42091e+06	3.54712e+06	2.24745e+06	3.2347e+06	3.43582e+06	3.26869e+06	3.25101e+06	10.7	8.77	22.54	3.07	4.10527e+06	3.67558e+06	3.06316e+06	1.84803e+06	1.66371e+06	1.51376e+06	3.78613e+06	2.40825e+06	3.27111e+06	3.79417e+06	3.42884e+06	3.25101e+06	3.61467e+06	1.67517e+06	3.15516e+06	3.49134e+06	523717	167426	696216	276921	1.03533	0.479806	0.903711	0.0500842	-1.05948	-0.146066	0.736646	0.000627019	0.480482
		189.928	1.056	4.13203e+06	3.72101e+06	3.98695e+06	3.73112e+06	3.4761e+06	3.81904e+06	3.79865e+06	3.44429e+06	3.6984e+06	4.13203e+06	3.61167e+06	3.63678e+06	3.91431e+06	3.95	5.2	9.25	4.51	4.0978e+06	4.31613e+06	3.80171e+06	3.86641e+06	4.39501e+06	4.04689e+06	3.67637e+06	3.96301e+06	4.17854e+06	3.98836e+06	3.81496e+06	3.91431e+06	4.07188e+06	4.10277e+06	3.93931e+06	3.90588e+06	258185	268698	251925	87006.1	1.0425	1.05041	1.00856	0.0600488	0.0709521	0.0122959	0.350797	0.293764	0.83864
	C9 H16 O4	188.104	14.624	2.01505e+06	1.63694e+06	1.68916e+06	2.01505e+06	1.68176e+06	1.61359e+06	1.58224e+06	1.38947e+06	1.63481e+06	1.72483e+06	1.75079e+06	1.75444e+06	1.91657e+06	11.51	3.13	10.96	5.24	1.8027e+06	1.82862e+06	2.05317e+06	1.87059e+06	1.85694e+06	1.68563e+06	1.4831e+06	1.75178e+06	1.74425e+06	1.9334e+06	1.8404e+06	1.91657e+06	1.89483e+06	1.80439e+06	1.65971e+06	1.89679e+06	137739	103072	152995	49554.1	0.998968	0.951286	0.875009	-0.00148967	-0.0720484	-0.192631	0.98263	0.234274	0.0630774
		187.929	1.052	4.66518e+06	3.8818e+06	4.42928e+06	4.20274e+06	3.48139e+06	4.26549e+06	4.25535e+06	3.69747e+06	3.98434e+06	4.66518e+06	3.82201e+06	3.92308e+06	4.3589e+06	6.59	11.24	12.08	7.07	4.27488e+06	4.79498e+06	4.28226e+06	3.87229e+06	4.9088e+06	4.53343e+06	3.94661e+06	4.26941e+06	4.7177e+06	4.22063e+06	4.11529e+06	4.3589e+06	4.45071e+06	4.43817e+06	4.31124e+06	4.23161e+06	298170	524779	387242	122177	1.05178	1.04881	1.01882	0.0728281	0.0687596	0.0268969	0.304205	0.543001	0.751189
		187.12	13.481	4.35596e+06	4.01872e+06	3.93534e+06	4.35596e+06	3.42721e+06	3.38455e+06	3.62602e+06	3.0518e+06	2.90648e+06	3.12864e+06	3.50393e+06	3.43671e+06	3.81979e+06	5.43	3.7	3.72	5.7	4.42566e+06	4.26026e+06	4.43838e+06	3.81203e+06	3.89499e+06	3.86298e+06	3.25743e+06	3.11443e+06	3.16386e+06	3.86938e+06	3.60509e+06	3.81979e+06	4.37477e+06	3.85667e+06	3.17857e+06	3.76475e+06	99372.2	41838.6	72625.5	140481	1.16203	1.02441	0.844298	0.216651	0.0347995	-0.244175	0.0035668	0.338506	0.0030257
		186.119	16.651	697213	697213	671707	680187	154657	6065.22	180174	531831	519443	507803	250212	244152	258134	1.9	82.75	2.31	2.8	767814	727166	693056	172023	6979.95	191948	567666	556609	513520	276308	256114	258134	729345	123650	545931	263519	37426.7	101529	28608.8	11122.2	2.76772	0.469227	2.0717	1.4687	-1.09164	1.05082	3.23961e-05	0.0766612	9.06377e-05
		185.932	1.051	8.63055e+06	7.58832e+06	6.99567e+06	8.05099e+06	5.46222e+06	8.11473e+06	8.23893e+06	7.1698e+06	7.87639e+06	8.63055e+06	7.32517e+06	7.65659e+06	8.35242e+06	7.01	21.57	9.26	6.74	8.35672e+06	7.57325e+06	8.20332e+06	6.07554e+06	9.33856e+06	8.77734e+06	7.6529e+06	8.43993e+06	8.7277e+06	8.08917e+06	8.03172e+06	8.35242e+06	8.04443e+06	8.06381e+06	8.27351e+06	8.15777e+06	415200	1.74461e+06	556390	171002	0.986107	0.988483	1.01419	-0.0201845	-0.0167126	0.0203253	0.684547	0.930498	0.747882
		184.107	14.303	2.5754e+06	1.41732e+06	1.55492e+06	1.83138e+06	2.16441e+06	2.47273e+06	2.5754e+06	1.6402e+06	1.77346e+06	1.87467e+06	1.74769e+06	1.89224e+06	1.97838e+06	13.17	8.9	6.67	6.22	1.56084e+06	1.68329e+06	1.86604e+06	2.40744e+06	2.84566e+06	2.7437e+06	1.75072e+06	1.90035e+06	1.89577e+06	1.92997e+06	1.98495e+06	1.97838e+06	1.70339e+06	2.6656e+06	1.84895e+06	1.96444e+06	153586	229310	85096.6	30025.7	0.867115	1.35693	0.94121	-0.205705	0.440345	-0.0874114	0.0445986	0.00629173	0.0909438
		182.987	1.491	1.14618e+06	1.14618e+06	458734	745689	1.07814e+06	538628	575383	902216	504416	755138	1.10434e+06	439383	1.01011e+06	44.07	41.25	27.91	42.27	1.26225e+06	496608	759797	1.1992e+06	619861	612984	963008	540506	763638	1.21952e+06	460910	1.01011e+06	839551	810681	755717	896846	389000	336483	211362	391782	0.936115	0.903925	0.842639	-0.095242	-0.145725	-0.247013	0.866091	0.786955	0.612143
		179.038	1.055	1.6085e+06	1.60842e+06	1.33344e+06	1.52551e+06	1.16025e+06	1.25247e+06	1.28479e+06	1.4265e+06	1.57415e+06	1.6085e+06	1.29106e+06	1.25328e+06	1.17984e+06	9.47	5.24	6.29	4.56	1.7713e+06	1.44353e+06	1.55437e+06	1.29052e+06	1.44136e+06	1.36875e+06	1.52262e+06	1.68677e+06	1.6266e+06	1.42571e+06	1.31468e+06	1.17984e+06	1.58973e+06	1.36688e+06	1.612e+06	1.30674e+06	166721	75435.5	83044.9	123129	1.21656	1.04602	1.2336	0.282806	0.0649085	0.302875	0.0772493	0.510631	0.0235863
		177.942	1.319	2.40381e+08	1.96143e+08	2.15307e+08	221877948	2.09151e+08	2.20558e+08	2.29964e+08	2.13599e+08	2.11643e+08	2.39076e+08	2.21499e+08	2.3582e+08	2.40381e+08	6.33	4.74	6.91	4.24	2.16004e+08	2.33084e+08	2.26076e+08	2.32635e+08	253821173	2.44992e+08	2.27992e+08	2.26786e+08	241767035	2.44601e+08	247373746	2.40381e+08	225054779	2.43816e+08	2.32182e+08	2.44119e+08	8.58549e+06	1.06418e+07	8.323e+06	3.52107e+06	0.921907	0.99876	0.951102	-0.117307	-0.00178995	-0.0723288	0.0236206	0.964937	0.0840572
		177.938	0.22	2.32305e+06	1.89059e+06	2.32305e+06	925582	1.68477e+06	1.38161e+06	786644	1.65738e+06	1.2645e+06	843790	544964	1.6644e+06	812274	41.76	35.57	32.41	58.04	2.08204e+06	2.51485e+06	943094	1.87394e+06	1.58998e+06	838051	1.76906e+06	1.35498e+06	853288	601802	1.74594e+06	812274	1.84666e+06	1.43399e+06	1.32577e+06	1.05334e+06	811883	535272	458584	608973	1.75315	1.36138	1.25864	0.809948	0.445066	0.331866	0.247206	0.461746	0.569436
		175.963	1.055	839045	668255	725387	839045	634956	757630	814150	706643	745979	778493	479339	635679	682423	11.68	12.45	4.84	17.75	735924	785277	854920	706251	871892	867355	754258	799352	787256	529333	666824	682423	792040	815166	780289	626193	59785.7	94350.5	23340.7	84245.4	1.26485	1.30178	1.24608	0.338967	0.380487	0.317401	0.0497828	0.0608328	0.0379119
		171.125	13.751	2.83649e+06	2.83649e+06	2.62781e+06	2.71747e+06	2.66222e+06	2.4616e+06	2.59156e+06	2.44575e+06	2.43913e+06	2.47048e+06	2.40527e+06	2.40978e+06	2.36951e+06	3.84	3.96	0.67	0.92	3.12372e+06	2.84478e+06	2.76889e+06	2.96114e+06	2.83284e+06	2.76092e+06	2.61054e+06	2.61365e+06	2.49829e+06	2.65613e+06	2.52785e+06	2.36951e+06	2.91246e+06	2.85164e+06	2.57416e+06	2.51783e+06	186848	101426	65723.4	143573	1.15674	1.13258	1.02237	0.21006	0.17961	0.0319224	0.0440851	0.0302416	0.57007
		170.951	1.055	1.03779e+07	7.08305e+06	8.25509e+06	8.54768e+06	6.48762e+06	8.34388e+06	8.76178e+06	7.52819e+06	8.89512e+06	1.03779e+07	6.69077e+06	8.52961e+06	9.10045e+06	9.73	15.39	15.95	15.53	7.8003e+06	8.93666e+06	8.70941e+06	7.21607e+06	9.60226e+06	9.33436e+06	8.03545e+06	9.53155e+06	1.04947e+07	7.3886e+06	8.94751e+06	9.10045e+06	8.48212e+06	8.71756e+06	9.3539e+06	8.47885e+06	601310	1.30721e+06	1.23921e+06	947276	1.00039	1.02815	1.1032	0.000555773	0.0400555	0.141699	0.996218	0.810497	0.386233
		170.141	14.973	1.51385e+06	1.51385e+06	1.32021e+06	1.38294e+06	703114	653118	739611	1.33074e+06	1.25911e+06	1.43689e+06	789214	718093	714505	7.03	6.22	6.66	5.69	1.66714e+06	1.42921e+06	1.4091e+06	782061	751618	787945	1.4204e+06	1.34919e+06	1.45307e+06	871527	753276	714505	1.50182e+06	773875	1.40755e+06	779769	143527	19498	53114.7	81795.2	1.92598	0.99244	1.80509	0.94559	-0.0109475	0.85207	0.00163215	0.909213	0.00036833
		168.982	16.083	9.73563e+06	7.85935e+06	7.585e+06	8.85927e+06	7.69676e+06	7.74354e+06	8.09035e+06	8.81764e+06	9.33383e+06	9.73563e+06	9.15313e+06	8.97765e+06	9.63438e+06	8.28	2.74	4.95	3.67	8.6552e+06	8.21125e+06	9.02689e+06	8.56097e+06	8.91139e+06	8.61905e+06	9.41178e+06	1.00016e+07	9.84522e+06	1.01078e+07	9.41751e+06	9.63438e+06	8.63111e+06	8.69714e+06	9.75288e+06	9.71989e+06	408355	187808	305581	352987	0.887985	0.894777	1.00339	-0.171393	-0.160399	0.00488883	0.025038	0.0114183	0.908486
		168.953	1.058	6.20381e+06	4.41302e+06	5.13328e+06	5.40402e+06	2.78946e+06	3.27917e+06	3.62639e+06	3.34237e+06	3.64201e+06	6.20381e+06	2.91842e+06	4.9809e+06	5.47014e+06	10.28	13.01	35.78	30.39	4.85989e+06	5.5571e+06	5.50627e+06	3.10266e+06	3.77372e+06	3.86338e+06	3.56758e+06	3.90259e+06	6.27365e+06	3.2228e+06	5.22493e+06	5.47014e+06	5.30775e+06	3.57992e+06	4.58127e+06	4.63929e+06	388695	415741	1.47518e+06	1.23283e+06	1.14409	0.771653	0.987494	0.194197	-0.373976	-0.0181561	0.42105	0.231262	0.960819
		167.029	13.081	679961	609413	647877	679961	464586	464861	530465	407014	425992	456300	511738	538277	532357	5.47	7.8	5.78	2.64	671123	701368	692827	516751	534969	565131	434439	456471	461437	565111	564649	532357	688439	538951	450782	554039	15592.2	24434.6	14369.7	18778.8	1.24258	0.972766	0.813629	0.313342	-0.0398349	-0.297557	0.00067495	0.44418	0.00163784
		166.986	16.089	2.63526e+08	1.88969e+08	2.11261e+08	2.18585e+08	1.9766e+08	2.05304e+08	2.19487e+08	222823040	2.38266e+08	2.56471e+08	2.41508e+08	2.33476e+08	2.63526e+08	7.48	5.34	7.04	6.32	2.08105e+08	2.28703e+08	2.22721e+08	2.19854e+08	2.36267e+08	2.3383e+08	2.37837e+08	255313815	2.59358e+08	2.66697e+08	244915392	2.63526e+08	2.19843e+08	2.29984e+08	2.50836e+08	2.5838e+08	1.05965e+07	8.85701e+06	1.14378e+07	1.17676e+07	0.850853	0.890101	0.970805	-0.233018	-0.167959	-0.042746	0.0135313	0.0288536	0.470513
		166.956	1.059	1.04071e+07	8.2027e+06	8.69057e+06	9.42766e+06	7.71782e+06	5.50183e+06	9.32416e+06	8.63395e+06	5.89944e+06	1.04071e+07	7.66789e+06	8.65888e+06	9.68895e+06	7.03	25.54	27.32	11.65	9.03331e+06	9.4081e+06	9.60604e+06	8.58439e+06	6.33159e+06	9.93349e+06	9.21572e+06	6.32154e+06	1.05243e+07	8.46763e+06	9.08312e+06	9.68895e+06	9.34915e+06	8.28316e+06	8.68719e+06	9.0799e+06	290878	1.81975e+06	2.15065e+06	610667	1.02965	0.912252	0.956749	0.0421592	-0.132495	-0.0637872	0.528442	0.511937	0.776111
c5, TPA	C8 H6 O4	166.026	13.049	7.59703e+06	7.59703e+06	7.27058e+06	7.22726e+06	5.41792e+06	5.39465e+06	6.22515e+06	4.62229e+06	5.06372e+06	5.55919e+06	5.67169e+06	5.69181e+06	6.36451e+06	2.74	8.33	9.22	6.67	8.36632e+06	7.87086e+06	7.364e+06	6.02626e+06	6.20825e+06	6.63196e+06	4.93374e+06	5.42602e+06	5.62177e+06	6.26324e+06	5.97068e+06	6.36451e+06	7.86706e+06	6.28882e+06	5.32718e+06	6.19947e+06	501168	310785	354506	204514	1.26899	1.01441	0.859295	0.343678	0.020644	-0.218775	0.00594115	0.698784	0.0209888
		163.061	1.055	2.23246e+06	1.41231e+06	1.34121e+06	1.58651e+06	586528	628439	691834	1.97978e+06	2.23246e+06	2.14717e+06	350252	410998	447388	8.72	8.34	6.06	12.18	1.55533e+06	1.45195e+06	1.61652e+06	652385	723218	737046	2.11318e+06	2.39218e+06	2.17134e+06	386782	431135	447388	1.54127e+06	704216	2.22557e+06	421768	83183.9	45416.6	147197	31369.8	3.65429	1.66967	5.27675	1.86959	0.739567	2.39965	2.61462e-05	0.00089503	3.18154e-05
	C8 H18 O3	162.125	14.3	4.0629e+06	2.47314e+06	2.48897e+06	2.64043e+06	4.02358e+06	3.70511e+06	4.0629e+06	2.79398e+06	2.79334e+06	2.92539e+06	2.88095e+06	3.01092e+06	2.94896e+06	3.64	4.99	2.68	2.21	2.72358e+06	2.69446e+06	2.69039e+06	4.47536e+06	4.26389e+06	4.3284e+06	2.98224e+06	2.9932e+06	2.95832e+06	3.18143e+06	3.15844e+06	2.94896e+06	2.70281e+06	4.35589e+06	2.97792e+06	3.09627e+06	18101.9	108380	17834.1	128098	0.872923	1.40682	0.961776	-0.196074	0.492433	-0.0562278	0.0062214	0.000201906	0.188146
		158.023	1.511	1.66658e+07	1.40492e+07	1.35275e+07	1.49537e+07	1.51252e+07	1.30393e+07	1.36705e+07	1.33679e+07	1.35079e+07	1.31974e+07	1.21195e+07	1.66658e+07	1.29531e+07	5.09	7.67	1.16	17.4	1.54718e+07	1.46443e+07	1.52366e+07	1.68235e+07	1.50058e+07	1.45639e+07	1.42686e+07	1.44744e+07	1.3346e+07	1.33835e+07	1.74824e+07	1.29531e+07	1.51176e+07	1.54644e+07	1.40297e+07	1.46063e+07	426401	1.19756e+06	600932	2.50001e+06	1.035	1.05875	0.960519	0.0496352	0.0823563	-0.0581139	0.744566	0.620287	0.717463
		157.936	1.052	945211	737399	827118	757813	773245	806863	765748	854414	884781	945211	743755	758941	773063	6.08	2.8	5.17	1.93	812069	895407	772151	860067	928550	815790	911985	948085	955851	821327	796125	773063	826543	868136	938640	796838	62889.8	56811.7	23408.6	24139.8	1.03728	1.08948	1.17796	0.0528027	0.123634	0.236286	0.487572	0.116039	0.00186835
		157.146	17.626	4.80911e+06	4.11786e+06	3.62812e+06	4.80911e+06	3.79923e+06	3.18509e+06	3.51004e+06	3.74718e+06	3.76382e+06	4.30149e+06	4.02587e+06	3.59889e+06	3.91963e+06	14.18	8.78	8.01	5.78	4.53485e+06	3.92767e+06	4.9001e+06	4.22582e+06	3.66545e+06	3.73942e+06	3.99967e+06	4.03311e+06	4.34991e+06	4.44575e+06	3.77521e+06	3.91963e+06	4.4542e+06	3.87689e+06	4.12756e+06	4.04687e+06	491205	304431	193282	352913	1.10066	0.957999	1.01994	0.138363	-0.0619037	0.0284855	0.308225	0.56191	0.745821
		157.031	1.51	1.14943e+07	7.15169e+06	6.44907e+06	6.02077e+06	6.75963e+06	6.32836e+06	8.65956e+06	6.48542e+06	6.14113e+06	6.28329e+06	1.14943e+07	8.14641e+06	6.58346e+06	8.73	17.11	2.74	28.7	7.87588e+06	6.98152e+06	6.13469e+06	7.51862e+06	7.28277e+06	9.22546e+06	6.92241e+06	6.58051e+06	6.35402e+06	1.26931e+07	8.54554e+06	6.58346e+06	6.99736e+06	8.00895e+06	6.61898e+06	9.27404e+06	870703	1.06011e+06	286141	3.1193e+06	0.754511	0.863588	0.713711	-0.406386	-0.211584	-0.486588	0.290284	0.542371	0.21599
		156.027	1.52	1.99664e+08	1.65809e+08	1.59346e+08	1.99664e+08	1.63456e+08	1.49528e+08	1.52354e+08	1.75742e+08	1.83114e+08	1.46092e+08	1.70167e+08	1.52493e+08	1.4025e+08	12.38	4.75	11.64	9.75	1.82599e+08	1.72502e+08	2.03442e+08	1.8181e+08	1.72079e+08	1.6231e+08	1.87583e+08	1.96216e+08	1.47737e+08	1.87915e+08	159964324	1.4025e+08	1.86181e+08	1.72066e+08	1.77179e+08	1.6271e+08	1.57778e+07	9.74987e+06	2.58601e+07	2.39506e+07	1.14425	1.0575	1.08892	0.194402	0.0806612	0.122903	0.229324	0.564856	0.516351
		155.939	1.047	2.166e+06	1.78251e+06	1.9662e+06	1.84724e+06	1.77645e+06	1.85697e+06	1.26513e+06	1.90428e+06	2.1157e+06	2.166e+06	1.86085e+06	2.00571e+06	2.05457e+06	5	19.66	6.74	5.1	1.963e+06	2.12854e+06	1.8822e+06	1.97592e+06	2.13703e+06	1.34781e+06	2.03259e+06	2.26708e+06	2.19038e+06	2.05494e+06	2.10397e+06	2.05457e+06	1.99125e+06	1.82025e+06	2.16335e+06	2.07116e+06	125578	417006	119557	28418.5	0.961417	0.878856	1.04451	-0.0567662	-0.186301	0.0628299	0.342889	0.357174	0.263634
		155.021	13.997	502721	164731	158219	178692	164450	159213	174401	488505	455045	502721	222104	204044	242404	6.26	4.65	5.08	8.61	181412	171283	182072	182915	183225	185798	521421	487602	508380	245269	214041	242404	178256	183979	505801	233905	6047.95	1582.74	17056.4	17261.7	0.762087	0.786556	2.16242	-0.391973	-0.34638	1.11265	0.00621315	0.00755091	4.15633e-05
		152.941	1.059	1.51309e+07	1.19943e+07	1.26597e+07	1.30327e+07	1.10834e+07	1.26908e+07	1.32155e+07	1.24555e+07	1.35408e+07	1.51309e+07	1.12542e+07	1.28362e+07	1.37931e+07	4.19	9.01	9.82	10.15	1.32089e+07	1.37049e+07	1.32793e+07	1.23279e+07	1.46048e+07	1.40791e+07	1.32948e+07	1.45096e+07	1.53013e+07	1.2428e+07	1.34651e+07	1.37931e+07	1.33977e+07	1.36706e+07	1.43685e+07	1.32287e+07	268364	1.19217e+06	1.01066e+06	712565	1.01277	1.0334	1.08616	0.0183113	0.0474019	0.11924	0.720261	0.610935	0.185614
		151.943	1.053	1.90447e+06	1.40372e+06	1.57301e+06	1.71606e+06	1.24746e+06	1.5069e+06	1.75223e+06	1.44502e+06	1.86559e+06	1.90447e+06	1.266e+06	1.60309e+06	1.6702e+06	10	16.8	14.66	14.32	1.54586e+06	1.70289e+06	1.74853e+06	1.38753e+06	1.73416e+06	1.86674e+06	1.54239e+06	1.99907e+06	1.92591e+06	1.39804e+06	1.68164e+06	1.6702e+06	1.66576e+06	1.66281e+06	1.82246e+06	1.58329e+06	106315	247445	245292	160536	1.05209	1.05022	1.15106	0.0732546	0.0706973	0.202959	0.499374	0.664834	0.23051
		150.942	1.057	2.6199e+07	2.6199e+07	2.18429e+07	2.28974e+07	2.42448e+07	2.14414e+07	2.31588e+07	2.15961e+07	2.38083e+07	2.59417e+07	2.48247e+07	2.55009e+07	2.34642e+07	9.61	6.16	9.14	4.22	2.8852e+07	2.36464e+07	2.33306e+07	2.69671e+07	2.46751e+07	2.46722e+07	2.30513e+07	2.55117e+07	2.62337e+07	27413887	2.67503e+07	2.34642e+07	2.52763e+07	2.54381e+07	2.49323e+07	2.58761e+07	3.10064e+06	1.32412e+06	1.66847e+06	2.11499e+06	0.976821	0.983074	0.963524	-0.0338335	-0.0246279	-0.0536068	0.795662	0.776279	0.576708
	C9 H10 O2	150.067	13.957	1.14468e+06	1.05804e+06	1.07753e+06	1.14468e+06	848290	957574	960873	848020	863284	1.02297e+06	914244	1.01103e+06	993469	4.16	6.95	10.63	5.3	1.16518e+06	1.16649e+06	1.16634e+06	943538	1.10199e+06	1.02367e+06	905160	925050	1.03448e+06	1.0096e+06	1.06056e+06	993469	1.166e+06	1.02306e+06	954898	1.02121e+06	716.715	79228	69637.3	35022.3	1.14179	1.00182	0.935066	0.191293	0.00261843	-0.0968606	0.00201453	0.972188	0.214621
		149.943	0.217	1.80931e+06	1.65424e+06	1.80931e+06	1.53623e+06	404777	905735	703864	1.3669e+06	1.13643e+06	621121	431545	1.13928e+06	683513	8.22	37.54	36.66	47.74	1.82175e+06	1.95869e+06	1.5653e+06	450226	1.04233e+06	749861	1.459e+06	1.21774e+06	628112	476554	1.1951e+06	683513	1.78191e+06	747474	1.10162e+06	785055	199700	296061	427442	369877	2.2698	0.95213	1.40324	1.18256	-0.0707698	0.488758	0.0147609	0.897361	0.386972
		149.084	17.032	1.74583e+06	1.56659e+06	1.62498e+06	1.74583e+06	1.34623e+06	1.23905e+06	1.40541e+06	1.06233e+06	1.0908e+06	1.01741e+06	1.30607e+06	1.34438e+06	1.2533e+06	5.55	6.34	3.5	3.51	1.72523e+06	1.75915e+06	1.77886e+06	1.49739e+06	1.42592e+06	1.49726e+06	1.13391e+06	1.16884e+06	1.02886e+06	1.44229e+06	1.41025e+06	1.2533e+06	1.75441e+06	1.47352e+06	1.11054e+06	1.36861e+06	27128	41225	72860.9	101142	1.2819	1.07666	0.811435	0.358278	0.106558	-0.301452	0.00309422	0.171497	0.0230461
		148.945	1.059	5.33893e+07	3.18594e+07	4.54508e+07	4.71028e+07	3.86046e+07	3.45948e+07	3.80074e+07	4.51575e+07	4.8784e+07	5.33893e+07	3.35359e+07	4.62016e+07	4.93057e+07	20.17	5.84	8.4	19.42	3.50855e+07	4.92033e+07	4.7994e+07	4.29393e+07	3.98123e+07	4.04912e+07	4.82003e+07	5.22744e+07	5.39903e+07	3.70336e+07	4.84652e+07	4.93057e+07	4.40943e+07	4.10809e+07	5.14883e+07	4.49348e+07	7.82523e+06	1.64479e+06	2.97399e+06	6.85554e+06	0.981294	0.914233	1.14584	-0.0272425	-0.129367	0.19641	0.895471	0.39734	0.203392
	C8 H4 O3	148.016	12.115	1.78209e+06	853455	923632	1.07856e+06	1.63135e+06	1.47204e+06	1.78209e+06	977154	919618	1.02344e+06	1.04808e+06	1.05401e+06	1.14156e+06	12.1	9.52	5.34	4.84	939877	999890	1.09897e+06	1.81452e+06	1.69405e+06	1.89855e+06	1.043e+06	985415	1.03496e+06	1.15739e+06	1.10565e+06	1.14156e+06	1.01291e+06	1.80237e+06	1.02112e+06	1.13487e+06	80340	102792	31184.8	26510.5	0.892536	1.58818	0.899773	-0.164017	0.667372	-0.152366	0.0669914	0.000403502	0.00856471
		141.943	1.051	5.3025e+06	3.49569e+06	5.04794e+06	4.90814e+06	3.97189e+06	5.06192e+06	4.94925e+06	4.62749e+06	4.81005e+06	5.3025e+06	4.20168e+06	4.68266e+06	4.91723e+06	19.15	12.86	7.11	7.93	3.84967e+06	5.46472e+06	5.00101e+06	4.41786e+06	5.82534e+06	5.27268e+06	4.9393e+06	5.1542e+06	5.36219e+06	4.63991e+06	4.91208e+06	4.91723e+06	4.7718e+06	5.17196e+06	5.1519e+06	4.82307e+06	831564	709121	211454	158648	0.989369	1.07234	1.06818	-0.0154193	0.100758	0.0951512	0.921501	0.452392	0.0974911
		141.94	1.239	4.62718e+07	3.62656e+07	4.38365e+07	4.36692e+07	3.75828e+07	4.51538e+07	4.60526e+07	3.91514e+07	4.16638e+07	4.62718e+07	3.52523e+07	3.96694e+07	4.49991e+07	10.48	10.84	8.52	12.21	3.99379e+07	4.74558e+07	4.44954e+07	4.18027e+07	5.19637e+07	4.90621e+07	4.17894e+07	4.46447e+07	46792655	3.89291e+07	4.1613e+07	4.49991e+07	4.3963e+07	4.76095e+07	4.44089e+07	4.18471e+07	3.78712e+06	5.23391e+06	2.50994e+06	3.04176e+06	1.05056	1.1377	1.06122	0.0711652	0.186124	0.0857239	0.492527	0.174545	0.323457
		137.013	1.566	4.0079e+06	2.97578e+06	3.14976e+06	3.19719e+06	4.0079e+06	2.57e+06	2.25344e+06	3.38189e+06	2.40596e+06	3.17046e+06	1.3327e+06	1.33083e+06	3.37892e+06	3.75	31.76	17.19	58.68	3.27711e+06	3.40981e+06	3.25768e+06	4.45792e+06	2.9576e+06	2.4007e+06	3.60977e+06	2.5781e+06	3.20615e+06	1.4717e+06	1.39603e+06	3.37892e+06	3.31487e+06	3.27207e+06	3.13134e+06	2.08222e+06	82795.2	1.06405e+06	519884	1.12361e+06	1.59199	1.57144	1.50385	0.67083	0.652084	0.588659	0.130993	0.253756	0.216085
		135.014	16.144	1.24495e+07	4.91011e+06	4.89473e+06	8.21178e+06	4.6051e+06	5.62493e+06	9.7133e+06	5.70173e+06	9.65867e+06	1.17611e+07	6.0418e+06	9.83861e+06	1.24495e+07	31.82	40.67	34.03	34.12	5.40732e+06	5.29885e+06	8.36715e+06	5.12217e+06	6.47326e+06	1.03481e+07	6.08592e+06	1.03497e+07	1.18935e+07	6.67194e+06	1.03206e+07	1.24495e+07	6.35777e+06	7.3145e+06	9.44304e+06	9.81404e+06	1.74102e+06	2.71261e+06	3.00806e+06	2.92193e+06	0.647824	0.745309	0.962196	-0.626326	-0.424089	-0.055597	0.153208	0.338597	0.885632
		135.013	16.075	1.20816e+06	878603	968802	992999	814595	941513	1.01469e+06	968304	1.03198e+06	1.20816e+06	1.10271e+06	1.13169e+06	1.20731e+06	6.37	10.96	11.62	4.71	967572	1.04879e+06	1.01179e+06	906060	1.08351e+06	1.081e+06	1.03355e+06	1.10582e+06	1.22176e+06	1.21772e+06	1.18713e+06	1.20731e+06	1.00938e+06	1.02352e+06	1.12038e+06	1.20405e+06	40662.1	101733	94947.7	15549.9	0.83832	0.850064	0.930504	-0.254426	-0.234357	-0.103915	0.00149703	0.0384643	0.206441
	C9 H10 O	134.073	14.168	1.07559e+06	1.01414e+06	1.07559e+06	977421	925089	870226	913629	648954	746487	789094	796160	810509	748862	4.85	3.2	9.87	4.11	1.11683e+06	1.16439e+06	995915	1.02896e+06	1.00147e+06	973334	692681	799897	797977	879198	850219	748862	1.09238e+06	1.00125e+06	763519	826093	86860.1	27813.6	61354.5	68435.5	1.32235	1.21204	0.924253	0.4031	0.277433	-0.113641	0.0140207	0.0147686	0.303669
	C9 H8 O	132.057	15.62	2.24568e+06	380749	295716	654471	1.02083e+06	1.10345e+06	2.24568e+06	1.45275e+06	1.85322e+06	1.76151e+06	922853	2.00637e+06	2.12409e+06	42.26	47	12.42	39.31	419304	320131	666853	1.13545e+06	1.26986e+06	2.39243e+06	1.55064e+06	1.98581e+06	1.78134e+06	1.0191e+06	2.10467e+06	2.12409e+06	468763	1.59925e+06	1.7726e+06	1.74929e+06	178574	690198	217716	632433	0.267973	0.914228	1.01332	-1.89984	-0.129374	0.0190956	0.0279135	0.795071	0.954767
	C9 H8 O	132.057	15.4	2.74423e+06	499268	479759	750354	2.25162e+06	2.15148e+06	2.74423e+06	2.07076e+06	427477	404367	2.10742e+06	1.57696e+06	1.37722e+06	26.18	13.32	98.76	22.37	549825	519370	764551	2.50443e+06	2.47596e+06	2.92357e+06	2.21029e+06	458062	408919	2.32722e+06	1.65422e+06	1.37722e+06	611248	2.63465e+06	1.02576e+06	1.78622e+06	133634	250611	1.02613e+06	488562	0.342202	1.47499	0.574261	-1.54708	0.560703	-0.80022	0.0158919	0.0554412	0.310947
		129.152	9.5	4.5368e+07	4.5368e+07	3.47189e+07	2.59063e+07	1.14349e+07	2.96661e+07	1.46959e+07	2.79454e+07	2.02076e+07	1.6607e+07	2.92148e+07	2.2219e+07	1.02206e+07	27.58	52.27	26.84	46.74	4.99621e+07	3.75854e+07	2.63964e+07	1.27188e+07	3.41402e+07	1.56563e+07	2.98284e+07	2.16534e+07	1.67939e+07	3.22619e+07	2.33076e+07	1.02206e+07	3.79813e+07	2.08384e+07	2.27586e+07	2.193e+07	1.17878e+07	1.16129e+07	6.58714e+06	1.1085e+07	1.73193	0.950224	1.03778	0.792383	-0.0736597	0.0535034	0.160898	0.911928	0.916743
		129.151	10.036	4.10051e+07	3.08069e+07	3.95672e+07	4.10051e+07	3.49694e+07	2.49357e+06	3.16725e+07	2.50713e+07	2.2264e+07	2.48434e+07	1.32738e+07	2.4441e+07	2.65018e+07	14.87	77.56	6.48	33.25	3.39265e+07	4.2834e+07	4.17809e+07	3.88959e+07	2.86964e+06	3.37423e+07	2.67607e+07	2.38569e+07	2.51231e+07	1.46582e+07	2.56384e+07	2.65018e+07	3.95138e+07	2.51693e+07	2.52469e+07	2.22661e+07	4.86734e+06	1.94832e+07	1.45583e+06	6.60282e+06	1.77461	1.13038	1.13387	0.827505	0.176813	0.181254	0.0219289	0.818921	0.487676
		127.012	1.046	884183	471745	558721	552459	157304	199607	217823	605385	734995	884183	110530	120102	152795	9.19	16.21	18.81	17.34	519515	604851	562912	174966	229710	232057	646176	787583	894136	122058	125986	152795	562426	212245	775965	133613	42670.1	32305.4	124388	16727.8	4.20937	1.5885	5.80756	2.0736	0.667669	2.53793	8.48321e-05	0.020056	0.000894373
		122.947	1.056	2.19491e+06	1.91362e+06	1.67658e+06	1.98486e+06	1.75344e+06	1.92667e+06	2.02147e+06	2.15797e+06	2.19491e+06	1.87822e+06	1.76724e+06	2.0262e+06	1.82949e+06	8.68	7.15	8.34	7.21	2.10739e+06	1.81501e+06	2.02241e+06	1.95032e+06	2.21724e+06	2.15358e+06	2.30338e+06	2.35195e+06	1.89937e+06	1.95156e+06	2.12547e+06	1.82949e+06	1.9816e+06	2.10704e+06	2.1849e+06	1.96884e+06	150402	139409	248466	148745	1.00648	1.0702	1.10974	0.00932252	0.0978743	0.150219	0.921796	0.305451	0.265868
		122.035	13.055	1.32891e+06	1.26613e+06	1.27436e+06	1.32891e+06	958053	918780	1.05147e+06	764031	761605	924558	942698	1.00515e+06	1.0532e+06	2.65	6.98	11.43	5.54	1.39435e+06	1.37957e+06	1.35405e+06	1.06563e+06	1.05735e+06	1.12019e+06	815512	816096	934966	1.04102e+06	1.0544e+06	1.0532e+06	1.37599e+06	1.08105e+06	855525	1.04954e+06	20385.1	34141.8	68798.7	7402.01	1.31104	1.03003	0.815144	0.390715	0.0426827	-0.294873	1.28592e-05	0.193208	0.00830103
		122.033	1.054	3.35093e+06	2.36887e+06	2.11281e+06	2.46603e+06	903985	966718	1.02905e+06	3.1708e+06	3.35093e+06	3.2825e+06	561703	645990	689567	7.88	6.47	2.78	10.28	2.60874e+06	2.28725e+06	2.51268e+06	1.00549e+06	1.11251e+06	1.0963e+06	3.38446e+06	3.59069e+06	3.31945e+06	620287	677640	689567	2.46956e+06	1.07143e+06	3.43153e+06	662498	165026	57683.6	141613	37038.8	3.72765	1.61726	5.17969	1.89827	0.693554	2.37287	5.01776e-05	0.000495116	5.17357e-06
		120.95	1.056	4.06073e+06	3.62587e+06	2.60636e+06	3.36174e+06	3.18743e+06	3.61801e+06	3.39217e+06	3.91642e+06	4.06073e+06	3.83431e+06	3.33032e+06	3.2484e+06	2.83201e+06	16.55	6.34	2.91	8.52	3.99303e+06	2.82155e+06	3.42535e+06	3.54533e+06	4.16366e+06	3.61385e+06	4.18031e+06	4.35127e+06	3.87747e+06	3.67767e+06	3.40755e+06	2.83201e+06	3.41331e+06	3.77428e+06	4.13635e+06	3.30574e+06	585833	338949	239936	431921	1.03254	1.14173	1.25126	0.0461971	0.191226	0.323384	0.810592	0.213456	0.043603
		113.992	1.18	1.46534e+07	1.23735e+07	1.27244e+07	1.45546e+07	1.29993e+07	1.41857e+07	1.46534e+07	1.21067e+07	1.26957e+07	1.34187e+07	1.19362e+07	1.32148e+07	1.42331e+07	8.86	6.11	5.16	8.77	1.36264e+07	1.3775e+07	1.483e+07	1.44589e+07	1.63251e+07	1.5611e+07	1.29224e+07	1.36041e+07	1.35698e+07	1.31811e+07	1.38622e+07	1.42331e+07	1.40771e+07	1.5465e+07	1.33654e+07	1.37588e+07	656224	941669	384042	533594	1.02314	1.12401	0.97141	0.0330002	0.168652	-0.0418479	0.550011	0.0524216	0.358574
		113.01	1.055	2.08684e+06	1.92723e+06	1.1964e+06	2.08684e+06	1.76042e+06	1.70477e+06	1.58338e+06	1.81379e+06	1.81475e+06	1.54876e+06	1.66139e+06	1.80349e+06	1.29997e+06	27.34	5.38	8.88	16.34	2.12238e+06	1.29518e+06	2.12632e+06	1.95809e+06	1.96188e+06	1.68685e+06	1.936e+06	1.9446e+06	1.56619e+06	1.83467e+06	1.89185e+06	1.29997e+06	1.84796e+06	1.86894e+06	1.8156e+06	1.6755e+06	478729	157704	216032	326468	1.10293	1.11545	1.08362	0.141345	0.157631	0.115856	0.633375	0.407725	0.568911
		111.949	1.044	1.04644e+06	879692	976958	930286	861902	904820	929400	910400	1.03564e+06	1.04644e+06	910695	926827	1.00916e+06	5.24	3.8	7.58	5.57	968771	1.05762e+06	947887	958678	1.04128e+06	990136	971743	1.10974e+06	1.05822e+06	1.00568e+06	972236	1.00916e+06	991426	996698	1.04657e+06	995692	58268	41690.4	69731.3	20387.9	0.995715	1.00101	1.0511	-0.00619494	0.00145713	0.0718931	0.910489	0.971844	0.291898
		111.532	1.049	1.06271e+06	998419	668624	740612	387356	354462	300054	1.06271e+06	938616	1.04874e+06	223752	202409	188328	21.61	12.7	6.69	8.71	1.09952e+06	723828	754625	430849	407920	319663	1.13432e+06	1.00577e+06	1.06055e+06	247089	212325	188328	859324	386144	1.06688e+06	215914	208585	58704.5	64505.6	29544.2	3.97993	1.78841	4.94122	1.99274	0.83868	2.30487	0.00612868	0.0109358	3.17235e-05
		108.012	1.051	1.27582e+06	1.27582e+06	967644	1.20452e+06	876855	830873	949278	1.08909e+06	1.0542e+06	1.09507e+06	1.09683e+06	962749	953675	14.04	6.74	2.04	7.98	1.40501e+06	1.04754e+06	1.22731e+06	975311	956182	1.01131e+06	1.16247e+06	1.12963e+06	1.1074e+06	1.21123e+06	1.00992e+06	953675	1.22662e+06	980935	1.13316e+06	1.05827e+06	178739	27992.9	27705.5	135414	1.15908	0.92692	1.07077	0.212975	-0.109483	0.0986448	0.263357	0.387535	0.401135
		106.953	1.057	1.43828e+06	961126	1.18763e+06	1.28157e+06	887709	1.15624e+06	1.22124e+06	1.03083e+06	1.24368e+06	1.43828e+06	936298	1.18814e+06	1.24618e+06	14.41	16.25	16.47	14.66	1.05845e+06	1.28569e+06	1.30582e+06	987383	1.33062e+06	1.30105e+06	1.10029e+06	1.33266e+06	1.45447e+06	1.03395e+06	1.24635e+06	1.24618e+06	1.21665e+06	1.20635e+06	1.29581e+06	1.17549e+06	137377	190206	179943	122580	1.03502	1.02625	1.10235	0.0496525	0.0373813	0.140586	0.718316	0.824892	0.392707
		106.045	2.944	1.4864e+06	445111	571927	538509	482372	1.4864e+06	671458	447900	821786	604010	366767	569566	547983	12.68	60.62	30.07	22.51	490183	619147	548698	536535	1.71057e+06	715338	478080	880583	610810	405020	597472	547983	552676	987480	656491	516825	64573.8	632561	205103	99937.6	1.06937	1.91067	1.27024	0.0967589	0.934076	0.3451	0.629316	0.271993	0.348794
		106.045	2.775	1.5398e+06	1.41611e+06	1.33032e+06	1.42064e+06	1.46529e+06	283650	1.5398e+06	1.45283e+06	1.49519e+06	1.48367e+06	1.34921e+06	1.51153e+06	1.47546e+06	3.66	64.28	1.48	5.9	1.5595e+06	1.44015e+06	1.44751e+06	1.62982e+06	326429	1.64042e+06	1.55072e+06	1.60217e+06	1.50037e+06	1.48993e+06	1.58559e+06	1.47546e+06	1.48239e+06	1.19889e+06	1.55109e+06	1.51699e+06	66884.8	755591	50900.4	59845.9	0.97719	0.790307	1.02247	-0.0332888	-0.339515	0.0320642	0.540831	0.507538	0.494086
		103.5	1.056	1.57643e+06	1.30934e+06	924990	1.11815e+06	1.16922e+06	1.39342e+06	1.31238e+06	1.17048e+06	1.57643e+06	1.20796e+06	1.11981e+06	1.43736e+06	1.09276e+06	17.2	8.79	17.02	15.75	1.44192e+06	1.00136e+06	1.1393e+06	1.30051e+06	1.60357e+06	1.39814e+06	1.24935e+06	1.68922e+06	1.22156e+06	1.23661e+06	1.50779e+06	1.09276e+06	1.1942e+06	1.43407e+06	1.38671e+06	1.27905e+06	225353	154693	262351	210742	0.933656	1.1212	1.08417	-0.0990365	0.165043	0.116588	0.65867	0.362431	0.609023
		102.501	1.055	2.43879e+06	1.99779e+06	1.55529e+06	1.88601e+06	1.80829e+06	2.14839e+06	1.79196e+06	1.97498e+06	2.43879e+06	1.86755e+06	1.73565e+06	2.29286e+06	1.71551e+06	12.69	10.5	14.5	17.11	2.20008e+06	1.68369e+06	1.9217e+06	2.01133e+06	2.47241e+06	1.90907e+06	2.10806e+06	2.61328e+06	1.88858e+06	1.91668e+06	2.4052e+06	1.71551e+06	1.93516e+06	2.13093e+06	2.2033e+06	2.01246e+06	258458	300111	371620	354680	0.961587	1.05887	1.09483	-0.0565103	0.0825235	0.130707	0.775509	0.681566	0.554966
		101.502	1.052	3.82185e+06	3.1393e+06	2.66851e+06	2.77996e+06	2.89075e+06	3.64981e+06	2.85177e+06	3.25879e+06	3.82185e+06	3.33952e+06	3.21949e+06	3.79617e+06	2.9387e+06	8.59	14.37	8.77	13.17	3.4572e+06	2.88883e+06	2.83255e+06	3.21533e+06	4.20025e+06	3.03813e+06	3.47837e+06	4.0953e+06	3.37711e+06	3.55527e+06	3.98216e+06	2.9387e+06	3.05953e+06	3.48457e+06	3.65026e+06	3.49204e+06	345538	626100	388726	524594	0.876142	0.99786	1.04531	-0.190763	-0.00309084	0.0639275	0.298942	0.988115	0.696259
		100.024	1.051	2.0602e+06	1.44063e+06	1.45146e+06	1.61823e+06	539973	664539	601886	1.98293e+06	1.97167e+06	2.0602e+06	438113	449610	503822	6.62	10.34	2.4	7.57	1.58651e+06	1.57129e+06	1.64885e+06	600602	764762	641219	2.11654e+06	2.11274e+06	2.08339e+06	483807	471638	503822	1.60222e+06	668861	2.10422e+06	486422	41096.5	85499.4	18144.2	16250.4	3.29388	1.37506	4.32592	1.71979	0.459497	2.11301	1.63479e-06	0.0221432	3.4239e-08
		99.9961	1.506	2.37009e+08	2.1577e+08	2.07837e+08	2.13471e+08	213656579	1.0419e+08	1.88583e+08	2.01987e+08	2.17169e+08	2.37009e+08	1.97895e+08	2.23346e+08	2.29582e+08	1.92	33.97	8.03	7.74	2.37619e+08	2.24996e+08	2.1751e+08	2.37646e+08	1.19903e+08	2.00907e+08	2.15597e+08	2.32707e+08	2.39677e+08	2.18535e+08	2.34289e+08	2.29582e+08	2.26709e+08	1.86152e+08	2.29327e+08	2.27469e+08	1.01633e+07	6.02423e+07	1.23906e+07	8.08655e+06	0.996658	0.818364	1.00817	-0.00482972	-0.289186	0.0117368	0.924125	0.304326	0.838453
		98.5241	1.054	971216	906351	705347	971216	636741	614877	741437	791932	826508	921173	674462	735925	842298	16.1	10.18	7.9	11.31	998130	763583	989592	708236	707610	789890	845293	885643	931542	744807	771981	842298	917102	735245	887493	786362	133020	47324.9	43154.1	50311.5	1.16626	0.934996	1.12861	0.221888	-0.0969684	0.174542	0.186538	0.269161	0.0574218
		97.9768	1.321	5.23748e+08	4.34261e+08	4.66284e+08	5.23748e+08	4.74283e+08	520294477	5.04705e+08	4.77374e+08	4.77957e+08	5.00909e+08	4.34291e+08	5.12468e+08	519305234	9.55	4.68	2.77	9.67	4.78235e+08	5.04782e+08	5.33658e+08	5.27537e+08	5.98763e+08	5.37687e+08	5.09539e+08	5.12154e+08	5.06547e+08	4.79587e+08	5.37576e+08	519305234	5.05558e+08	5.54663e+08	5.09414e+08	5.12156e+08	2.77198e+07	3.85278e+07	2.80527e+06	2.96485e+07	0.987118	1.083	0.994645	-0.0187056	0.115027	-0.00774609	0.792258	0.204488	0.881003
		97.9755	1.307	2.54949e+08	2.08837e+08	2.356e+08	2.29492e+08	2.07719e+08	2.39024e+08	2.54949e+08	2.16484e+08	2.38194e+08	2.34748e+08	2.07949e+08	2.52586e+08	2.31446e+08	6.24	10.27	5.08	9.68	2.29984e+08	2.55052e+08	2.33834e+08	2.31042e+08	2.75073e+08	2.7161e+08	2.3107e+08	2.55236e+08	2.37391e+08	2.29638e+08	264960995	2.31446e+08	2.39624e+08	2.59242e+08	241232474	2.42015e+08	1.34995e+07	2.44831e+07	1.25325e+07	1.98926e+07	0.99012	1.07118	0.996768	-0.0143254	0.0992024	-0.00467103	0.871582	0.397778	0.956806
		97.9663	1.572	1.34767e+07	1.19261e+07	1.0174e+07	1.15021e+07	1.21925e+07	5.35184e+06	2.88115e+06	12489640	1.02763e+07	8.21333e+06	1.34767e+07	3.92522e+06	9.23208e+06	8.16	70.85	20.71	53.9	1.31337e+07	1.1014e+07	1.17197e+07	1.35616e+07	6.15898e+06	3.06943e+06	1.33312e+07	1.10116e+07	8.30579e+06	1.48823e+07	4.11753e+06	9.23208e+06	1.19558e+07	7.59666e+06	1.08828e+07	9.41063e+06	1.07941e+06	5.39179e+06	2.51518e+06	5.38459e+06	1.27046	0.807242	1.15644	0.345349	-0.308926	0.209694	0.467114	0.701246	0.689974
		97.9662	1.828	2.29094e+06	2.29094e+06	1.66332e+06	2.03253e+06	2.18603e+06	1.49224e+06	1.68374e+06	1.72726e+06	762417	1.51698e+06	2.08894e+06	1.81846e+06	2.11664e+06	15.81	20.05	37.99	8.2	2.52292e+06	1.80065e+06	2.07099e+06	2.43148e+06	1.71729e+06	1.79377e+06	1.84364e+06	816967	1.53406e+06	2.30681e+06	1.90755e+06	2.11664e+06	2.13152e+06	1.98085e+06	1.39822e+06	2.11033e+06	364920	392128	526643	199705	1.01004	0.938642	0.662559	0.014413	-0.0913527	-0.593878	0.93394	0.637125	0.0937057
		97.9662	1.495	6.15473e+06	4.12784e+06	3.71417e+06	4.27676e+06	6.15473e+06	5.51034e+06	2.88115e+06	4.03108e+06	4.29291e+06	4.15567e+06	4.26142e+06	3.92522e+06	3.53245e+06	7.22	35.77	3.15	9.34	4.54583e+06	4.02083e+06	4.35768e+06	6.8458e+06	6.34139e+06	3.06943e+06	4.3027e+06	4.60006e+06	4.20245e+06	4.70587e+06	4.11753e+06	3.53245e+06	4.30811e+06	5.41887e+06	4.3684e+06	4.11862e+06	265988	2.05025e+06	206790	586712	1.04601	1.3157	1.06065	0.0648961	0.395833	0.0849457	0.637222	0.3505	0.525052
		96.5046	1.052	878976	771490	718643	760165	639265	764627	755052	768046	799515	878976	666191	693667	804375	3.71	9.7	7.01	10.14	849612	777977	774548	711043	879945	804395	819798	856719	888870	735673	727653	804375	800712	798461	855129	755900	42383.1	84607.1	34563.5	42171.6	1.05928	1.0563	1.13127	0.0830879	0.0790253	0.177946	0.264022	0.47908	0.0344459
		95.9868	1.523	8.20767e+07	6.43799e+07	4.30553e+07	4.4622e+07	4.56381e+07	3.77785e+07	4.17111e+07	5.2871e+07	3.56716e+07	2.85249e+07	2.95331e+07	3.33223e+07	8.20767e+07	23.45	9.42	32.07	60.66	7.08991e+07	4.66101e+07	4.54663e+07	5.07624e+07	4.34761e+07	4.44369e+07	5.64335e+07	3.82238e+07	2.8846e+07	3.26134e+07	3.49549e+07	8.20767e+07	5.43252e+07	4.62251e+07	4.11678e+07	4.98817e+07	1.43648e+07	3.95867e+06	1.40274e+07	2.79063e+07	1.08908	0.926696	0.825309	0.123111	-0.109832	-0.276994	0.818358	0.833225	0.654193
		92.4969	1.05	871389	693870	540277	648565	615540	730113	576933	701506	871389	669173	648729	695378	574773	12.58	12.43	14.53	9.51	764133	584884	660836	684654	840225	614635	748775	933735	676705	716389	729448	574773	669951	713171	786405	673537	89971.2	115467	132582	85780.7	0.994677	1.05885	1.16758	-0.00770045	0.0824924	0.223516	0.962552	0.65809	0.283417
		92.03	2.005	8.59114e+06	2.13599e+06	7.03917e+06	7.35999e+06	4.64316e+06	8.59114e+06	8.02943e+06	4.26551e+06	4.83419e+06	5.06084e+06	2.20599e+06	7.84872e+06	7.94403e+06	53.12	30.13	8.68	54.77	2.35229e+06	7.62035e+06	7.49925e+06	5.16451e+06	9.88682e+06	8.55415e+06	4.55293e+06	5.18007e+06	5.11781e+06	2.43607e+06	8.23326e+06	7.94403e+06	5.82396e+06	7.86849e+06	4.95027e+06	6.20446e+06	3.00717e+06	2.43468e+06	345512	3.26672e+06	0.938674	1.2682	0.797857	-0.0913037	0.342783	-0.325798	0.889187	0.51834	0.544572
		92.03	1.943	8.02943e+06	6.07366e+06	7.03917e+06	7.35999e+06	4.64316e+06	4.19955e+06	8.02943e+06	4.26551e+06	4.83419e+06	5.06084e+06	4.01475e+06	7.84872e+06	7.94403e+06	9.81	37.25	8.68	33.95	6.68869e+06	7.62035e+06	7.49925e+06	5.16451e+06	4.8329e+06	8.55415e+06	4.55293e+06	5.18007e+06	5.11781e+06	4.43348e+06	8.23326e+06	7.94403e+06	7.26943e+06	6.18385e+06	4.95027e+06	6.87026e+06	506565	2.05942e+06	345512	2.11526e+06	1.0581	0.90009	0.720536	0.081478	-0.151858	-0.472857	0.766487	0.707755	0.195706
		90.0303	1.835	648830	648830	494176	498697	405045	91764.6	531800	509820	372957	451937	428050	381578	576443	16.08	66.06	15.44	22.03	714532	534977	508132	450524	105604	566553	544172	399642	457025	472695	400273	576443	585880	374227	466946	483137	112221	239759	72774.1	88547.9	1.21266	0.774577	0.966488	0.278173	-0.368519	-0.0491761	0.281122	0.501439	0.818749
		85.0897	1.416	1.51288e+07	1.35991e+07	1.28914e+07	1.39171e+07	1.26863e+07	1.51288e+07	1.26214e+07	1.18402e+07	9.72474e+06	1.05484e+07	1.19457e+07	1.35719e+07	1.00738e+07	3.9	10.6	9.96	14.75	1.49761e+07	1.39558e+07	1.41804e+07	1.41107e+07	1.74105e+07	1.34462e+07	1.2638e+07	1.04205e+07	1.06671e+07	1.31916e+07	1.42368e+07	1.00738e+07	1.43708e+07	1.49891e+07	1.12419e+07	1.25008e+07	536146	2.12312e+06	1.21535e+06	2.16577e+06	1.14959	1.19906	0.899297	0.201122	0.261902	-0.15313	0.22022	0.228332	0.429534
		81.5304	1.051	2.12753e+06	1.41231e+06	1.34849e+06	1.60643e+06	586528	628439	762071	1.97952e+06	2.04671e+06	2.12753e+06	350252	410998	447388	9.23	13.91	3.61	12.18	1.55533e+06	1.45982e+06	1.63682e+06	652385	723218	811872	2.1129e+06	2.19315e+06	2.15148e+06	386782	431135	447388	1.55066e+06	729158	2.15251e+06	421768	88592	79909.6	40134.6	31369.8	3.67656	1.72881	5.10354	1.87836	0.789781	2.3515	3.15373e-05	0.00343779	4.99306e-07

## Sheet: PET
Table S8D. All metabolomics results obtained for incubations of Thioclava sp. BHET1, Bacillus sp. BHET2 and Ideonella sakaiensis with amorphous PET, including compounds detected, predicted formula of compounds and peak area in each sample.
Name	Predicted Formula	Molecular Weight	RT [min]	Area (Max.)	Area: thio_pet_R1	Area: thio_pet_R2	Area: thio_pet_R3	Area: baci_pet_R1	Area: baci_pet_R2	Area: baci_pet_R3	Area: ideo_pet_R1	Area: ideo_pet_R2	Area: ideo_pet_R3	Area: none_pet_R1	Area: none_pet_R2	Group CV [%]: thioclava_pet	Group CV [%]: bacillus_pet	Group CV [%]: ideonella_pet	Group CV [%]: none_pet	Norm. Area: thio_pet_R1	Norm. Area: thio_pet_R2	Norm. Area: thio_pet_R3	Norm. Area: baci_pet_R1	Norm. Area: baci_pet_R2	Norm. Area: baci_pet_R3	Norm. Area: ideo_pet_R1	Norm. Area: ideo_pet_R2	Norm. Area: ideo_pet_R3	Norm. Area: none_pet_R1	Norm. Area: none_pet_R2	Avg. Norm. Area: thioclava_pet	Avg. Norm. Area: bacillus_pet	Avg. Norm. Area: ideonella_pet	Avg. Norm. Area: none_pet	SD Norm. Area: thioclava_pet	SD Norm. Area: bacillus_pet	SD Norm. Area: ideonella_pet	SD Norm. Area: none_pet	Ratio Avg. Norm. Area: thioclava_pet/none	Ratio Avg. Norm. Area: bacillus_pet/none	Ratio Avg. Norm. Area: idionella_pet/none	Log2 Fold Change: thioclava_pet/none	Log2 Fold Change: bacillus_pet/none	Log2 Fold Change: idionella_pet/none	P-value: thioclava_pet/none	P-value: bacillus_pet/none	P-value: idionella_Pet/none
		995.59	13.397	1.93162e+06	1.4556e+06	1.24396e+06	1.93162e+06	1.17547e+06	1.20398e+06	1.55987e+06	1.21161e+06	1.36864e+06	1.48324e+06	1.13887e+06	1.05266e+06	22.8151	16.3107	10.0673	5.563	1.82428e+06	1.24396e+06	2.09683e+06	1.39857e+06	1.38072e+06	1.99702e+06	1.66974e+06	1.64013e+06	1.73618e+06	1.51255e+06	1.39056e+06	1.72169e+06	1.5921e+06	1.68202e+06	1.45155e+06	435593	350785	49187.9	86264.9	1.1861	1.09683	1.15877	0.246226	0.133335	0.212593	0.47035	0.633074	0.0290238
		981.575	13.165	337102	273329	189831	337102	205619	181385	287614	247040	306364	332525	188755	223404	27.6866	24.7563	14.8323	11.8889	342560	189831	365933	244644	208012	368218	340449	367137	389232	250690	295116	299441	273625	365606	272903	95641.8	83943.1	24427.7	31413.7	1.09725	1.00264	1.33969	0.133887	0.00381058	0.421902	0.740926	0.991802	0.0327335
		899.525	13.36	477689	287292	308459	477689	247407	211348	352020	228584	233954	254726	240146	280952	29.1642	27.036	5.77462	11.0742	360059	308459	518544	294363	242374	450675	315013	280363	298166	318944	371136	395687	329137	297847	345040	109480	108417	17327.3	36905.1	1.14679	0.953911	0.863226	0.197599	-0.0680736	-0.212189	0.588603	0.860486	0.13649
		881.559	12.964	2.74049e+06	1.31337e+06	2.33735e+06	1.96975e+06	1.23334e+06	2.05623e+06	2.74049e+06	1.24478e+06	1.95489e+06	1.7179e+06	1.33429e+06	1.8955e+06	27.6879	37.5439	22.0557	24.5735	1.64603e+06	2.33735e+06	2.13821e+06	1.46741e+06	2.35808e+06	3.50852e+06	1.71545e+06	2.34268e+06	2.01086e+06	1.7721e+06	2.50395e+06	2.04053e+06	2.44467e+06	2.02299e+06	2.13802e+06	355859	1.02331e+06	313790	517493	0.954401	1.14343	0.946198	-0.0673323	0.193363	-0.0797854	0.814323	0.730212	0.769854
		867.543	12.723	408608	278394	271360	408608	278978	210719	336017	307642	334589	383864	196748	206543	24.1942	22.7922	11.3008	3.43485	348908	271360	443554	331925	241653	430187	423964	400961	449327	261305	272842	354608	334588	424751	267074	86238.3	94295.4	24192.5	8157.74	1.32775	1.25279	1.59039	0.408984	0.325148	0.669377	0.26736	0.408389	0.0034129
		867.507	15.205	756803	651787	18248.7	756803	223744	202732	596551	464310	426156	458779	368451	420757	84.0083	64.9705	4.58426	9.37279	816876	18248.7	821529	266209	232493	763736	639869	510692	537016	489349	555817	552218	420812	562526	522583	462437	297459	68262.3	47000.3	1.05671	0.805255	1.07643	0.0795785	-0.312482	0.106259	0.937062	0.679259	0.531165
		867.507	15.055	494340	90735.9	494340	2898.79	465482	431103	31365.4	2369.66	245342	6804.59	3503.42	334762	133.722	78.019	163.861	138.492	113718	494340	3146.72	553826	494388	40155.6	3265.64	294010	7965.01	4652.97	442219	203735	362790	101747	223436	257672	280986	166521	309406	0.911827	1.62369	0.455373	-0.133167	0.699274	-1.13488	0.942597	0.635907	0.594442
		849.533	12.808	1.19046e+06	790237	797329	1.19046e+06	703726	678986	837817	781531	677996	908672	587468	728032	24.7352	11.5458	14.6363	15.1112	990393	797329	1.29228e+06	837287	778661	1.07262e+06	1.07703e+06	812488	1.06363e+06	780229	961725	1.02667e+06	896188	984385	870977	249460	155578	149018	128337	1.17875	1.02895	1.13021	0.237261	0.0411669	0.176588	0.48879	0.86302	0.447354
		837.533	13.027	354871	293173	253360	354871	237940	261215	305436	284417	271808	352587	248941	265566	17.0225	12.7836	14.3455	4.56986	367430	253360	385222	283099	299561	391035	391957	325726	412716	330624	350812	335337	324565	376799	340718	71549.6	58150.3	45432.7	14274.9	0.984208	0.952592	1.1059	-0.022965	-0.0700701	0.14522	0.926722	0.737852	0.374736
		785.494	12.88	429089	303810	310170	429089	240302	218610	334665	206005	213201	254340	214493	272752	20.2956	23.326	11.6153	16.9094	380761	310170	465788	285909	250702	428456	283897	255494	297713	284873	360304	385573	321689	279035	322589	77920.5	94123.8	21525.8	53337.2	1.19525	0.997211	0.864986	0.257309	-0.00402949	-0.209251	0.400987	0.991249	0.271093
		767.527	12.443	1.42037e+06	813897	883950	1.42037e+06	389429	862680	854802	701925	745761	1.0702e+06	467751	685609	31.9199	38.5853	23.9684	26.713	1.02005e+06	883950	1.54185e+06	463339	989321	1.09436e+06	967329	893696	1.2527e+06	621231	905686	1.14861e+06	849007	1.03791e+06	763459	347281	338103	189625	201140	1.50449	1.11205	1.35948	0.589273	0.153227	0.443058	0.262285	0.77484	0.218149
		754.459	14.506	446680	343016	288876	446680	305070	298168	297484	301196	291260	237482	269141	305391	22.3036	1.3976	12.391	8.92298	429897	288876	484883	362969	341939	380855	415081	349036	277981	357452	403420	401219	361921	347366	380436	101102	19478.9	68565.6	32504	1.05463	0.951332	0.913074	0.0767351	-0.0719786	-0.131197	0.805419	0.470096	0.582908
		753.476	14.737	805983	711386	544257	805983	477365	465370	579134	431716	429813	497480	446859	451265	19.2849	12.3219	8.50537	0.693668	891571	544257	874915	567964	533685	741438	594952	515074	582317	593484	596118	770248	614363	564115	594801	195891	111377	42937.4	1862.42	1.29497	1.03289	0.948409	0.372916	0.0466832	-0.0764188	0.315728	0.828896	0.408568
	C42 H62 O11	742.423	13.338	309521	172648	148267	309521	139730	118674	236592	179439	222299	243328	158194	160365	41.3623	38.1148	15.1427	0.963807	216378	148267	335993	166250	136095	302897	247286	266396	284824	210101	211842	233546	201747	266169	210971	95033.5	88886.3	18769.8	1230.51	1.107	0.956279	1.26163	0.146659	-0.0644972	0.335293	0.770865	0.898098	0.0291134
		723.501	12.553	287349	156877	173621	287349	131435	135794	217755	209002	211409	226512	129031	147327	34.4695	30.0799	4.40147	9.36273	196612	173621	311925	156380	155728	278782	288027	253346	265141	171368	194618	227386	196963	268838	182993	74109.6	70857.5	17633.5	16439.7	1.24259	1.07634	1.46911	0.313354	0.106137	0.554947	0.485225	0.810966	0.0121144
	C41 H60 O10	712.412	13.65	6.8621e+06	5.16495e+06	4.79108e+06	6.8621e+06	4.27248e+06	4.379e+06	6.11133e+06	4.52837e+06	4.37874e+06	5.23874e+06	4.26422e+06	4.66798e+06	19.6881	20.9774	9.74414	6.39261	6.47316e+06	4.79108e+06	7.44899e+06	5.08336e+06	5.02183e+06	7.82405e+06	6.24058e+06	5.24733e+06	6.13213e+06	5.6634e+06	6.16637e+06	6.23774e+06	5.97642e+06	5.87335e+06	5.91489e+06	1.3445e+06	1.60039e+06	544850	355649	1.05458	1.0104	0.992977	0.0766732	0.0149299	-0.0101671	0.772247	0.962564	0.931864
	C47 H54 O5	698.397	13.31	968604	687182	627257	968604	677663	634712	847513	678773	703078	835526	567321	583269	23.9493	15.63	11.4142	1.96014	861235	627257	1.05144e+06	806277	727887	1.08503e+06	935423	842546	978013	753472	770494	846646	873065	918661	761983	212470	187705	69271.6	12036.6	1.11111	1.14578	1.20562	0.151999	0.19633	0.269773	0.630271	0.485629	0.0571275
		666.438	12.974	389022	109605	56094.3	389022	69582.2	70025.4	350910	57513	61600.3	303708	85279.3	240145	96.6875	99.2606	100.025	67.3007	137367	56094.3	422294	82788.2	80305	449253	79259.2	73819.8	355500	113261	317230	205251	204115	169526	215246	192306	212299	161081	144227	0.953569	0.948291	0.787595	-0.0685911	-0.0765984	-0.344474	0.954757	0.953435	0.768769
	C37 H56 O8	628.392	12.705	240692	197162	191235	240692	133334	129588	200972	141247	143122	160389	130305	136745	12.8788	25.9819	7.1175	3.4107	247101	191235	261278	158639	148611	257295	194654	171513	187741	173061	180640	233205	188182	184636	176850	37031.7	60063.6	11878.5	5359.16	1.31865	1.06407	1.04402	0.399066	0.0895977	0.0621522	0.135204	0.816891	0.463671
		617.35	13.566	269953	224634	185744	269953	188498	180226	226905	156522	152577	152404	148533	171008	18.5846	12.5454	1.51401	9.94691	281530	185744	293041	224273	206683	290496	215704	182844	178394	197270	225901	253438	240484	192314	211585	58907	44195.4	20378.3	20244.8	1.19781	1.13658	0.90892	0.260396	0.184702	-0.137774	0.422626	0.465189	0.375509
		616.347	13.566	1.34207e+06	1.05514e+06	850650	1.34207e+06	834200	855635	1.10133e+06	756207	717546	801786	745334	837564	22.8021	15.9535	5.55918	8.2402	1.32239e+06	850650	1.45685e+06	992523	981242	1.40999e+06	1.04214e+06	859884	938519	989894	1.10642e+06	1.20996e+06	1.12792e+06	946846	1.04816e+06	318356	244344	91410.7	82394.2	1.15437	1.0761	0.903345	0.207112	0.105808	-0.146651	0.550391	0.698818	0.298694
		602.331	13.139	219829	164418	155530	219829	136812	136351	163285	110338	118574	146070	170157	166943	19.3645	10.5982	14.9696	1.34855	206063	155530	238630	162778	156368	209046	152058	142096	170980	225989	220530	200075	176064	155045	223260	41872.5	28742.4	14672.1	3860.29	0.896151	0.788606	0.694458	-0.158186	-0.342624	-0.526041	0.512263	0.115912	0.00871914
		599.384	12.904	806384	596230	611371	806384	530462	486154	769800	655330	607413	713195	419557	455190	17.4589	25.6249	8.04204	5.7608	747247	611371	875351	631139	557521	985538	903116	727905	834820	557223	601303	744656	724733	821947	579263	132009	228844	88312.1	31169.1	1.28552	1.25113	1.41895	0.362356	0.323231	0.504827	0.195901	0.458297	0.037362
		598.539	14.019	271703	201946	23391.2	271703	196255	163568	267829	184567	135623	156276	218784	196288	77.2977	25.4879	15.471	7.66453	253096	23391.2	294941	233502	187580	342888	254354	162526	182926	290571	259295	190476	254657	199935	274933	146204	79785.9	48219	22115.4	0.692807	0.926249	0.727214	-0.529474	-0.110528	-0.459549	0.497055	0.759959	0.141374
	C43 H50 O2	598.381	12.998	7.57072e+06	5.38979e+06	2.84626e+06	7.57072e+06	2.09133e+06	4.91235e+06	3.0299e+06	1.96778e+06	5.18406e+06	6.5216e+06	2.73666e+06	2.17338e+06	44.8772	42.9533	51.3538	16.224	6.75495e+06	2.84626e+06	8.21822e+06	2.48825e+06	5.63348e+06	3.87903e+06	2.71181e+06	6.21241e+06	7.63376e+06	3.63462e+06	2.87102e+06	5.93981e+06	4.00025e+06	5.51933e+06	3.25282e+06	2.7772e+06	1.57611e+06	2.53311e+06	539949	1.82605	1.22978	1.69678	0.868727	0.298401	0.762802	0.288721	0.580114	0.320646
	C36 H52 O7	596.366	13.209	305404	180631	156722	245491	191190	169486	305404	174207	164194	192143	148712	162448	23.6421	32.887	8.00708	6.24288	226382	156722	266487	227476	194366	390994	240077	196765	224910	197508	214593	216530	270946	220584	206051	55542	105275	21977.7	12080.8	1.05086	1.31495	1.07053	0.0715691	0.395003	0.0983263	0.818591	0.470185	0.468923
		591.697	1.238	786944	624199	542712	489714	604533	511861	786944	548069	494982	574961	736138	755054	12.2678	22.0602	7.54594	1.79397	782300	542712	531597	719267	587001	1.00749e+06	755299	593171	673012	977681	997422	618870	771252	673827	987551	141644	215009	81067.2	13958.6	0.626671	0.780974	0.682321	-0.67422	-0.356653	-0.551477	0.039949	0.270332	0.0141613
		589.904	1.386	1.25749e+07	7.84259e+06	1.25749e+07	1.05278e+07	9.26394e+06	1.0531e+07	8.68881e+06	6.70696e+06	7.19723e+06	8.63004e+06	8.49168e+06	7.67946e+06	23.0083	9.9269	13.3037	7.10308	9.82902e+06	1.25749e+07	1.14282e+07	1.10222e+07	1.2077e+07	1.11239e+07	9.24292e+06	8.62493e+06	1.01018e+07	1.1278e+07	1.01445e+07	1.12774e+07	1.14077e+07	9.3232e+06	1.07113e+07	1.37916e+06	581865	741683	801483	1.05285	1.06502	0.870412	0.0743045	0.0908766	-0.20023	0.645581	0.333394	0.139991
		589.699	1.232	993038	794709	682278	592248	768413	642322	993038	702721	632457	721546	915685	947164	14.7064	22.1714	6.84893	2.38983	995998	682278	642901	914250	736615	1.27134e+06	968426	757916	844595	1.21614e+06	1.2512e+06	773726	974068	856979	1.23367e+06	193498	272335	105800	24789	0.627174	0.78957	0.694658	-0.673062	-0.340861	-0.525625	0.0502455	0.2917	0.0180896
	C40 H42 O4	586.309	15.248	347785	263964	202189	310679	199520	216441	256982	308165	304011	347785	244419	277858	21.0156	13.1641	7.55129	9.05458	330822	202189	337250	237387	248214	329001	424685	364316	407094	324618	367048	290087	271534	398698	345833	76189.5	50061.6	31047.6	30002.8	0.838807	0.785159	1.15286	-0.25359	-0.348943	0.205221	0.414084	0.164118	0.155746
	C42 H48 O2	584.365	12.627	1.3443e+06	875127	844825	1.3443e+06	752228	760225	1.04387e+06	774054	576431	1.01897e+06	572509	745631	27.4164	19.4953	28.0683	18.5739	1.09679e+06	844825	1.45928e+06	894994	871825	1.33642e+06	1.06673e+06	690777	1.19274e+06	760362	984974	1.13363e+06	1.03441e+06	983414	872668	308878	261803	261145	158824	1.29904	1.18535	1.12691	0.377443	0.245309	0.172366	0.364881	0.501617	0.637343
	C41 H44 O3	584.329	16.777	2.72865e+06	2.30753e+06	1.7167e+06	2.72865e+06	1.85143e+06	1.91129e+06	2.39813e+06	1.93918e+06	1.86862e+06	2.25738e+06	1.80643e+06	1.81378e+06	22.5833	14.6015	10.2443	0.287348	2.892e+06	1.7167e+06	2.96202e+06	2.20281e+06	2.19187e+06	3.07022e+06	2.6724e+06	2.23929e+06	2.64235e+06	2.39915e+06	2.39599e+06	2.52357e+06	2.4883e+06	2.51801e+06	2.39757e+06	699650	503986	241844	2234.75	1.05255	1.03784	1.05023	0.0738924	0.0535845	0.0707105	0.824653	0.824724	0.55186
	C42 H46 O2	582.35	14.99	327749	276038	235014	317123	243910	225123	327749	252576	240532	270242	210192	238480	14.8717	20.5732	5.87284	8.91633	345955	235014	344246	290202	258171	419602	348078	288245	316328	279161	315031	308405	322658	317550	297096	63564	85469.4	29934.8	25363.8	1.03806	1.08604	1.06885	0.0538958	0.119077	0.0960547	0.833078	0.720777	0.489037
		576.751	1.971	1.52645e+06	592891	856070	847765	1.1157e+06	728893	1.05035e+06	591379	941969	1.52645e+06	608277	683586	19.5417	21.4566	46.3154	8.24411	743063	856070	920271	1.32745e+06	835894	1.34471e+06	814984	1.12882e+06	1.78676e+06	807867	903013	839801	1.16935e+06	1.24352e+06	855440	89717.5	288911	495940	67278.5	0.981719	1.36696	1.45367	-0.0266181	0.45097	0.539697	0.849544	0.24591	0.372783
		573.277	14.68	661914	535071	462280	661914	459619	429612	644729	520673	460822	609416	464998	474549	18.2663	22.7853	14.0983	1.43763	670597	462280	718525	546851	492678	825416	717543	552234	713343	617574	626876	617134	621649	661040	622225	136232	178535	94252.2	6577.58	0.991818	0.999073	1.06238	-0.0118533	-0.00133751	0.0873015	0.963184	0.996816	0.619501
		566.355	13.02	436672	410378	328728	436672	325507	316581	419290	327101	310183	391864	294214	307609	14.3618	16.0821	12.5674	3.14774	514321	328728	474018	387286	363055	536797	450781	371713	458690	390752	406350	439022	429046	427061	398551	97620.3	94098	48095.8	11029.3	1.10155	1.07651	1.07153	0.13953	0.106367	0.0996787	0.617925	0.694059	0.489715
		565.879	1.424	6.35316e+06	3.98259e+06	6.35316e+06	46710.7	4.40919e+06	4.71652e+06	3.5613e+06	3.22094e+06	3.73391e+06	3.43715e+06	4.00721e+06	3.671e+06	92.0428	14.148	7.43472	6.19255	4.99133e+06	6.35316e+06	50705.7	5.24602e+06	5.40891e+06	4.55936e+06	4.4388e+06	4.4746e+06	4.02331e+06	5.32206e+06	4.84936e+06	3.7984e+06	5.07143e+06	4.31223e+06	5.08571e+06	3.31625e+06	450878	250860	334250	0.746876	0.997191	0.847911	-0.42106	-0.00405829	-0.238015	0.639316	0.972332	0.0571723
		557.796	1.957	1.56991e+06	1.30939e+06	569239	1.16623e+06	689411	714406	1.02847e+06	559957	799357	1.06283e+06	1.56991e+06	620062	38.6798	23.3059	31.1539	61.3382	1.64105e+06	569239	1.26597e+06	820255	819280	1.3167e+06	771681	957924	1.24407e+06	2.08503e+06	819098	1.15875e+06	985413	991227	1.45207e+06	543888	286907	237951	895152	0.798002	0.678629	0.682632	-0.325536	-0.559306	-0.55082	0.669427	0.434045	0.427967
		555.83	1.468	4.93554e+06	3.76077e+06	4.02503e+06	4.93554e+06	2.95947e+06	3.77657e+06	4.05427e+06	3.25902e+06	3.1798e+06	3.53629e+06	3.55979e+06	3.512e+06	14.5338	15.8229	5.62956	0.955812	4.71332e+06	4.02503e+06	5.35765e+06	3.52116e+06	4.33097e+06	5.19049e+06	4.49129e+06	3.81057e+06	4.13935e+06	4.72784e+06	4.63933e+06	4.69867e+06	4.34754e+06	4.14707e+06	4.68359e+06	666431	834788	340424	62588.8	1.00322	0.92825	0.885447	0.00463818	-0.107415	-0.175522	0.977734	0.627116	0.126949
		554.878	16.366	1.10946e+07	9.16719e+06	7.40106e+06	1.10946e+07	8.07547e+06	7.42122e+06	8.60062e+06	9.12262e+06	8.12754e+06	7.6086e+06	8.83129e+06	9.48532e+06	20.0345	7.35612	9.2851	5.04969	1.14891e+07	7.40106e+06	1.20435e+07	9.60812e+06	8.51065e+06	1.1011e+07	1.2572e+07	9.73978e+06	8.90614e+06	1.1729e+07	1.25301e+07	1.03112e+07	9.70991e+06	1.0406e+07	1.21295e+07	2.53548e+06	1.25326e+06	1.92157e+06	566399	0.850092	0.800517	0.857902	-0.234309	-0.320996	-0.221116	0.412037	0.0902769	0.323701
	C34 H50 O6	554.355	13.111	613827	607600	387159	613827	367811	393264	485274	547840	581298	450006	424088	374740	24.0783	14.8741	12.9613	8.73642	761497	387159	666325	437618	450994	621273	754983	696609	526748	563241	495029	604994	503295	659447	529135	194559	102390	118569	48233.1	1.14336	0.951166	1.24627	0.193285	-0.0722304	0.31762	0.64194	0.769115	0.251464
		551.344	17.18	397327	52166.4	9527.92	397327	18127.8	32045.7	373842	78089.9	49783.7	330387	61021.2	104701	138.986	142.547	101.133	37.2747	65379.4	9527.92	431309	21568.3	36749.9	478613	107616	59659.1	386730	81043.6	138309	168739	178977	184668	109676	229101	259603	176626	40492.9	1.53852	1.63186	1.68376	0.62154	0.706521	0.751684	0.754086	0.74541	0.613192
		539.867	1.32	601369	292434	279386	601369	301956	306450	447576	336668	390739	527074	347164	332666	46.603	23.5251	23.4647	3.01592	366504	279386	652802	359265	351437	573011	463965	468249	616959	461076	439450	432897	427904	516391	450263	195361	125727	87120.4	15292.2	0.961432	0.950343	1.14687	-0.0567433	-0.07348	0.197697	0.912741	0.827413	0.386637
		533.848	1.496	8.80325e+06	3.07764e+06	4.98657e+06	4.54264e+06	3.08803e+06	4.63181e+06	4.03953e+06	2.56589e+06	3.2426e+06	8.80325e+06	4.03971e+06	2.79091e+06	23.7713	19.869	70.2699	25.8552	3.85717e+06	4.98657e+06	4.93115e+06	3.67411e+06	5.31175e+06	5.17162e+06	3.53608e+06	3.88583e+06	1.03045e+07	5.36522e+06	3.68677e+06	4.59163e+06	4.71916e+06	5.90881e+06	4.526e+06	636665	907749	3.81081e+06	1.18684e+06	1.0145	1.04268	1.30553	0.02077	0.060294	0.384631	0.938648	0.847386	0.666945
	C31 H44 O7	528.303	15.879	371209	280485	3417.31	371209	29004	35034.7	257640	167322	90814.2	146209	64416.2	212572	87.7418	121.516	29.3164	75.6437	351528	3417.31	402957	34508.7	40177.8	329845	230587	108829	171143	85552.7	280807	252634	134844	170186	183180	217354	168900	60885	138065	1.37916	0.736129	0.929069	0.463789	-0.44197	-0.106143	0.721861	0.761447	0.889189
		527.837	1.594	501662	415641	149773	420077	428619	498504	374938	401993	386862	348037	501662	390453	47.1222	14.2758	7.34413	17.6294	520917	149773	456005	509967	571684	480015	553990	463602	407389	666269	515786	375565	520555	474994	591027	198216	46742.9	73961.1	106408	0.635444	0.880764	0.803675	-0.654162	-0.183173	-0.315316	0.266043	0.364066	0.236545
		521.917	1.383	1.28911e+07	7.92378e+06	1.28911e+07	1.07901e+07	9.50488e+06	1.03713e+07	8.87143e+06	6.92849e+06	8.00131e+06	9.06789e+06	8.64542e+06	7.35471e+06	23.6683	7.85733	13.3726	11.4083	9.93077e+06	1.28911e+07	1.1713e+07	1.13088e+07	1.18938e+07	1.13577e+07	9.54821e+06	9.58851e+06	1.06143e+07	1.14822e+07	9.71552e+06	1.15116e+07	1.15201e+07	9.917e+06	1.05988e+07	1.49039e+06	324538	604201	1.24921e+06	1.08612	1.08692	0.935668	0.119183	0.120244	-0.095932	0.530619	0.280472	0.455497
		519.852	1.6	2.18822e+06	1.46322e+06	727048	1.97595e+06	1.57276e+06	1.62873e+06	2.18822e+06	1.78401e+06	1.65739e+06	1.83852e+06	1.89102e+06	1.6378e+06	45.2046	18.9435	5.28006	10.148	1.83383e+06	727048	2.14495e+06	1.87125e+06	1.86783e+06	2.80148e+06	2.45855e+06	1.98616e+06	2.15205e+06	2.5115e+06	2.16352e+06	1.56861e+06	2.18019e+06	2.19892e+06	2.33751e+06	745229	538057	239660	246059	0.671059	0.932696	0.94071	-0.575488	-0.100522	-0.0881774	0.270406	0.733772	0.574652
	C22 H48 O12	504.312	12.798	219847	219847	179854	64026.8	141083	143199	189294	122751	102445	155129	106192	126310	52.3544	17.2587	20.9598	12.2369	275532	179854	69502.7	167859	164220	242344	169164	122766	181584	141036	166854	174963	191474	157838	153945	103102	44091.8	31001.6	18256.5	1.13653	1.24378	1.02529	0.184631	0.314735	0.0360307	0.803703	0.353199	0.886276
		503.319	12.464	237310	37728.3	32401.3	237310	11157.1	14240.6	155729	1605.86	43128.3	107429	13290	28695.8	113.97	136.799	105.121	51.8917	47284.4	32401.3	257607	13274.7	16331.1	199373	2213.04	51683.5	125749	17650.7	37906.9	112431	76326.2	59882	27778.8	125946	106572	62174.9	14323.3	4.04736	2.74764	2.15567	2.01698	1.45819	1.10814	0.434974	0.585881	0.543224
		497.892	1.403	7.15255e+06	4.56863e+06	7.15255e+06	5.25219e+06	5.30388e+06	5.47288e+06	4.2345e+06	3.78684e+06	4.36183e+06	4.09971e+06	4.6119e+06	4.1836e+06	23.6641	13.4205	7.05085	6.88656	5.7258e+06	7.15255e+06	5.70139e+06	6.31051e+06	6.2763e+06	5.42123e+06	5.21867e+06	5.22708e+06	4.79885e+06	6.12516e+06	5.52651e+06	6.19325e+06	6.00268e+06	5.08153e+06	5.82583e+06	830873	503839	244846	423315	1.06307	1.03036	0.872241	0.0882314	0.0431418	-0.197201	0.615684	0.712725	0.0816216
		488.264	17.386	1.13947e+06	1.00053e+06	634038	1.13947e+06	773187	820850	1.12447e+06	604578	589819	736105	695433	631430	28.2384	21.0279	12.5154	6.82164	1.25395e+06	634038	1.23693e+06	919931	941350	1.4396e+06	833174	706820	861637	923620	834115	1.04164e+06	1.10029e+06	800544	878868	353096	294043	82405.4	63289.6	1.18521	1.25194	0.910881	0.245138	0.324171	-0.134666	0.58289	0.391496	0.344075
		486.321	12.996	218539	165988	122488	218539	111760	101806	127389	79900	68878.5	87539.4	87049.5	89465.7	28.4585	11.3466	11.9095	1.93581	208031	122488	237230	132971	116751	163089	110111	82541.7	102468	115612	118184	189250	137604	98373.5	116898	59631.9	23513.9	14233.3	1818.12	1.61893	1.17713	0.841533	0.695042	0.235273	-0.248909	0.202123	0.32316	0.18041
	C31 H48 O4	484.35	12.074	1.68897e+06	1.68897e+06	1.29146e+06	13555.9	1.24096e+06	1.20534e+06	31868.3	14472	1.42831e+06	1.52661e+06	1.1724e+06	15436.3	87.717	83.2894	85.4807	137.746	2.11676e+06	1.29146e+06	14715.3	1.47649e+06	1.38229e+06	40799.5	19943.9	1.71164e+06	1.78695e+06	1.55709e+06	20391.3	1.14098e+06	966524	1.17284e+06	788739	1.05907e+06	803084	999150	1.08661e+06	1.44659	1.2254	1.48699	0.532652	0.293258	0.57239	0.741902	0.843833	0.710081
	C25 H32 O9	476.204	18.236	2.61182e+06	1.79824e+06	2.61182e+06	1.88165e+06	131134	56169	1.73973e+06	895151	128036	1.77249e+06	1.31742e+06	1.06834e+06	21.3418	148.067	88.2979	14.7644	2.25372e+06	2.61182e+06	2.04259e+06	156023	64414.6	2.22729e+06	1.23361e+06	153435	2.07476e+06	1.74969e+06	1.41128e+06	2.30271e+06	815910	1.15394e+06	1.58048e+06	287764	1.22315e+06	963136	239296	1.45696	0.516241	0.730115	0.542965	-0.953885	-0.453805	0.0623699	0.467062	0.59951
		473.876	1.326	570249	299738	241837	570249	281649	297469	430989	377647	488084	462085	337588	291566	47.301	24.3648	13.045	10.3449	375657	241837	619021	335103	341137	551775	520439	584904	540887	448358	385156	412172	409338	548743	416757	191225	123390	32942.6	44690.2	0.988997	0.982199	1.3167	-0.0159615	-0.025913	0.396924	0.976672	0.942634	0.0303412
	C28 H40 O6	472.277	14.236	298318	217790	162129	298318	180686	173655	214919	238673	222539	264903	200429	197625	30.2866	11.634	8.83401	0.99636	272953	162129	323833	214978	199147	275150	328918	266684	310079	266195	261061	252972	229759	301893	263628	82682.6	40099.4	31914.3	3629.87	0.959578	0.871526	1.14515	-0.0595276	-0.198385	0.195535	0.873788	0.34034	0.207168
		471.879	1.322	1.24273e+06	578508	600774	1.24273e+06	495741	635107	950524	656546	784302	968088	635151	644126	46.7246	33.5839	19.5034	0.992107	725036	600774	1.34901e+06	589828	728340	1.21691e+06	904792	939882	1.13318e+06	843559	850886	891608	845027	992618	847222	400969	329424	122989	5181.29	1.05239	0.997408	1.17161	0.0736686	-0.00374409	0.228498	0.891363	0.993426	0.211063
	C29 H42 O5	470.298	15.637	2.58988e+06	1.77602e+06	1.44021e+06	2.58988e+06	1.3044e+06	1.21364e+06	1.6631e+06	1.24013e+06	1.17914e+06	1.19204e+06	1.22744e+06	1.25509e+06	30.5455	17.053	2.66996	1.57521	2.22587e+06	1.44021e+06	2.81138e+06	1.55196e+06	1.3918e+06	2.12919e+06	1.70903e+06	1.41305e+06	1.39532e+06	1.63019e+06	1.65797e+06	2.15915e+06	1.69099e+06	1.5058e+06	1.64408e+06	688019	387856	176226	19641.7	1.31329	1.02853	0.915892	0.393184	0.040583	-0.126751	0.389274	0.881497	0.371035
	C29 H42 O5	470.298	15.388	2.43952e+06	1.96353e+06	1.49094e+06	2.43952e+06	1.52471e+06	1.37466e+06	1.86351e+06	1.40457e+06	1.3437e+06	1.46475e+06	1.25807e+06	1.46562e+06	24.1412	15.7736	4.30977	10.7765	2.46087e+06	1.49094e+06	2.64817e+06	1.81409e+06	1.57645e+06	2.38576e+06	1.93564e+06	1.61024e+06	1.71454e+06	1.67087e+06	1.93608e+06	2.19999e+06	1.92543e+06	1.75348e+06	1.80347e+06	621157	415984	166158	187526	1.21986	1.06763	0.972276	0.286719	0.0944051	-0.0405619	0.46375	0.732757	0.77302
	C26 H30 O8	470.196	17.709	659765	7662.87	5382.36	659765	6593.44	5509.08	470466	6379.21	6108.52	371093	6217.11	5409.89	168.168	166.69	164.747	9.81828	9603.77	5382.36	716193	7844.81	6317.8	602316	8791.25	7320.25	434377	8257.08	7146.44	243726	205493	150163	7701.76	409173	343660	246138	785.343	31.6455	26.6813	19.4972	4.98393	4.73776	4.2852	0.49538	0.496265	0.494044
	C31 H48 O3	468.355	12.387	503685	503685	390304	6271.04	310554	322926	469331	295528	233681	327601	233689	274609	86.8718	24.0246	16.7155	11.3849	631262	390304	6807.38	369495	370332	600862	407270	280036	383468	310368	362757	342791	446896	356924	336562	314927	133339	67642.7	37044.5	1.01851	1.32783	1.0605	0.0264562	0.409067	0.0847459	0.980564	0.355682	0.731517
	C30 H44 O4	468.319	14.15	601553	455595	206863	601553	339403	195499	157265	208643	24859.1	480299	175882	183214	47.3641	41.6265	96.2992	2.88759	570991	206863	653002	403818	224198	201339	287533	29790.4	562206	233593	242025	476952	276452	293177	237809	237471	110893	266253	5962.28	2.00561	1.1625	1.23283	1.00404	0.217226	0.301968	0.26959	0.672207	0.798399
		459.245	13.483	2.05379e+06	1.73264e+06	1.38839e+06	2.05379e+06	1.50377e+06	1.35233e+06	1.77985e+06	1.36943e+06	1.36765e+06	1.51373e+06	1.3416e+06	1.34154e+06	19.2915	14.0271	5.91629	0.00311578	2.17149e+06	1.38839e+06	2.22945e+06	1.78917e+06	1.55086e+06	2.27865e+06	1.88722e+06	1.63895e+06	1.77187e+06	1.78181e+06	1.77216e+06	1.92978e+06	1.87289e+06	1.76601e+06	1.77698e+06	469747	371052	124242	6817.8	1.08598	1.05397	0.993827	0.119002	0.0758381	-0.00893404	0.692069	0.751671	0.913253
		457.853	1.451	8.37072e+06	5.26877e+06	1.16017e+06	8.37072e+06	4.96579e+06	5.06101e+06	6.94131e+06	4.64956e+06	4.30717e+06	6.85632e+06	4.41402e+06	4.45832e+06	73.3185	19.6975	26.2481	0.706137	6.60328e+06	1.16017e+06	9.08664e+06	5.90826e+06	5.80396e+06	8.88663e+06	6.4076e+06	5.16157e+06	8.02556e+06	5.86236e+06	5.88942e+06	5.6167e+06	6.86628e+06	6.53158e+06	5.87589e+06	4.05428e+06	1.75045e+06	1.43601e+06	19131	0.955888	1.16855	1.11159	-0.0650859	0.224721	0.152623	0.937051	0.503006	0.58347
	C24 H40 O8	456.268	16.453	1.58444e+07	45425.1	34480	90353.8	1.00894e+06	681858	115849	1.58444e+07	1.28545e+07	111037	7.25924e+06	1.01915e+06	52.1723	75.0298	87.0051	106.601	56930.6	34480	98081.5	1.20043e+06	781954	148316	2.18353e+07	1.54044e+07	129973	9.64116e+06	1.34629e+06	63164	710233	1.24566e+07	5.49373e+06	32255.7	529711	1.11489e+07	5.86536e+06	0.0114975	0.129281	2.26742	-6.44254	-2.95142	1.18105	0.177231	0.222365	0.489577
	C23 H34 O9	454.224	17.722	982656	277680	7192.81	982656	6724.99	5618.99	767552	7288.28	6230.39	526709	7730.34	6175.36	119.193	169.093	166.704	15.8142	348012	7192.81	1.0667e+06	8001.33	6443.85	982660	10044	7466.3	616532	10266.8	8157.62	473968	332369	211347	9212.23	540867	563170	350902	1491.45	51.4499	36.0791	22.942	5.6851	5.17309	4.51992	0.332497	0.497451	0.495923
		453.93	1.383	1.28051e+07	8.45885e+06	1.28051e+07	1.09428e+07	9.69754e+06	1.08393e+07	9.06507e+06	7.34319e+06	7.84927e+06	9.46222e+06	8.5584e+06	7.71407e+06	20.311	9.1131	13.4658	7.33787	1.06014e+07	1.28051e+07	1.18786e+07	1.1538e+07	1.24305e+07	1.16056e+07	1.01197e+07	9.4063e+06	1.10759e+07	1.13666e+07	1.01902e+07	1.17617e+07	1.1858e+07	1.02006e+07	1.07784e+07	1.1065e+06	496913	837713	831808	1.09123	1.10016	0.946393	0.125949	0.13772	-0.0794884	0.369767	0.156516	0.503901
	C33 H24 O2	452.18	15.915	3.34233e+06	3.34233e+06	2.81699e+06	3.2857e+06	58606.6	55317.7	1.88615e+06	11318.8	57389.8	2.58297e+06	846847	30722.6	9.15887	158.407	166.494	131.519	4.1889e+06	2.81699e+06	3.56671e+06	69729.6	63438.3	2.41475e+06	15598.6	68774.1	3.02346e+06	1.12472e+06	40584.4	3.5242e+06	849306	1.03594e+06	582650	686942	1.35572e+06	1.72144e+06	766597	6.04856	1.45766	1.77799	2.59659	0.543654	0.830243	0.0203686	0.82224	0.758336
		449.851	1.351	834659	576835	569735	834659	538365	574698	653247	656271	671353	740058	598086	622514	22.8565	9.97321	6.48	2.83029	722939	569735	906045	640542	659063	836321	904413	804528	866264	794332	822338	732906	711975	858402	808335	168376	108084	50404.3	19803.1	0.906686	0.880793	1.06194	-0.141324	-0.183126	0.0866997	0.591413	0.32093	0.289315
		447.855	1.346	1.70931e+06	1.21666e+06	1.25102e+06	1.70931e+06	1.16581e+06	1.14613e+06	1.36892e+06	1.19062e+06	1.19819e+06	1.35505e+06	1.21611e+06	1.28951e+06	19.7547	10.0525	7.43825	4.14268	1.52483e+06	1.25102e+06	1.8555e+06	1.38707e+06	1.31438e+06	1.75256e+06	1.6408e+06	1.43587e+06	1.58613e+06	1.61515e+06	1.70343e+06	1.54378e+06	1.48467e+06	1.55427e+06	1.65929e+06	302688	234831	106116	62429.5	0.930387	0.894762	0.936705	-0.104098	-0.160425	-0.0943333	0.647307	0.399155	0.307661
	C24 H30 O8	446.193	17.408	8.64746e+06	4.362e+06	2.72527e+06	5.29982e+06	5.27817e+06	5.90578e+06	8.31584e+06	6.30878e+06	6.75629e+06	8.64746e+06	5.11143e+06	4.73283e+06	31.5567	24.6715	17.1521	5.43893	5.46684e+06	2.72527e+06	5.75309e+06	6.27992e+06	6.77275e+06	1.06464e+07	8.69419e+06	8.09651e+06	1.01222e+07	6.7886e+06	6.25203e+06	4.6484e+06	7.89968e+06	8.97095e+06	6.52032e+06	1.67162e+06	2.39144e+06	1.0408e+06	379410	0.71291	1.21155	1.37585	-0.488208	0.276852	0.460319	0.234601	0.497877	0.0550361
		445.827	1.651	3.19155e+06	2.05104e+06	2.89638e+06	2.173e+06	3.19155e+06	2.09195e+06	2.26028e+06	2.18498e+06	2.26255e+06	2.02149e+06	1.75251e+06	2.36366e+06	19.2518	23.5534	5.70651	20.9975	2.57054e+06	2.89638e+06	2.35885e+06	3.79728e+06	2.39904e+06	2.89373e+06	3.01114e+06	2.71136e+06	2.36623e+06	2.32755e+06	3.12238e+06	2.60859e+06	3.03002e+06	2.69625e+06	2.72496e+06	270777	709009	322722	562029	0.957294	1.11195	0.989461	-0.0629665	0.15309	-0.0152846	0.766754	0.649232	0.944747
		444.819	1.762	2.09292e+06	1.44247e+06	1.99207e+06	2.09292e+06	1.55113e+06	1.43129e+06	1.76567e+06	1.19241e+06	1.63847e+06	2.05974e+06	1.40076e+06	1.37719e+06	19.0001	10.704	26.6053	1.20006	1.80783e+06	1.99207e+06	2.27192e+06	1.84552e+06	1.6414e+06	2.2605e+06	1.64327e+06	1.96348e+06	2.41099e+06	1.86038e+06	1.81926e+06	2.02394e+06	1.91581e+06	2.00592e+06	1.83982e+06	233681	315481	385615	29079.9	1.10007	1.0413	1.09028	0.1376	0.0583873	0.124697	0.369657	0.768268	0.60435
	C31 H24 O3	444.177	17.099	385607	158522	79737.1	385607	104761	93630.4	103193	114574	76842.3	62920.8	101148	103828	76.3693	5.99317	31.524	1.84902	198673	79737.1	418586	124644	107375	132113	157896	92085.3	73651	134337	137156	232332	121377	107877	135747	171914	12688.3	44287	1993.46	1.71151	0.894146	0.794696	0.775271	-0.161418	-0.331525	0.505768	0.228173	0.460724
		443.856	1.541	1.67882e+06	1.19639e+06	64729.5	1.67882e+06	1.37148e+06	1.21902e+06	1.57776e+06	1.12181e+06	1.1887e+06	1.59126e+06	1.23296e+06	1.21703e+06	84.5448	12.958	19.5252	0.918985	1.49941e+06	64729.5	1.8224e+06	1.63178e+06	1.39797e+06	2.01993e+06	1.54597e+06	1.4245e+06	1.86263e+06	1.63752e+06	1.6077e+06	1.12885e+06	1.68322e+06	1.61103e+06	1.62261e+06	935598	314156	226197	21086.1	0.695702	1.03736	0.992868	-0.52346	0.052915	-0.0103265	0.530021	0.81268	0.949703
		442.86	1.564	1.51615e+06	1.21891e+06	581817	1.51615e+06	1.32655e+06	1.21785e+06	1.46573e+06	1.11367e+06	1.19059e+06	1.37149e+06	1.2584e+06	1.20362e+06	43.1752	9.29518	10.8028	3.1466	1.52764e+06	581817	1.64582e+06	1.57832e+06	1.39663e+06	1.8765e+06	1.53475e+06	1.42676e+06	1.60538e+06	1.6713e+06	1.58997e+06	1.25176e+06	1.61715e+06	1.5223e+06	1.63064e+06	583187	242280	89956.7	57511.6	0.767649	0.991729	0.93356	-0.381481	-0.0119823	-0.0991848	0.448545	0.94592	0.237329
		441.235	14.648	371925	318847	242225	358828	298092	314179	370527	327068	286096	371925	290731	266911	19.3238	11.6108	13.0737	6.04099	399607	242225	389518	354668	360300	474369	450735	342848	435351	386126	352587	343783	396445	409645	369357	88096.3	67542.3	58356.7	23715.7	0.930762	1.07334	1.10908	-0.103516	0.102107	0.149358	0.727517	0.637622	0.438936
	C29 H44 O3	440.324	12.203	564248	510208	289829	6504.98	330737	340755	13197.5	436946	388682	564248	360984	509917	93.9217	81.6242	19.5772	24.1845	639436	289829	7061.33	393508	390778	16896.1	602159	465784	660472	479431	673598	312109	267060	576138	576515	316776	216653	99918.1	137296	0.541372	0.463233	0.999347	-0.885308	-1.11019	-0.000941869	0.362795	0.178647	0.997336
		439.35	16.715	2.48159e+06	2.48159e+06	2.16132e+06	2.09682e+06	56408.5	61181.7	141348	23243.5	31881.2	157114	36351.7	24488.5	9.17254	55.2895	105.902	27.5756	3.11014e+06	2.16132e+06	2.27615e+06	67114.3	70163.2	180962	32032	38205.4	183908	48279.5	32349.2	2.51587e+06	106080	84715.1	40314.3	517848	64867.6	85958.9	11264.4	62.4064	2.63131	2.10136	5.96362	1.39578	1.07133	0.0076831	0.26982	0.539754
		437.313	15.447	1.2464e+06	658986	529018	883096	445456	398746	599948	1.12598e+06	1.14046e+06	1.2464e+06	330966	465886	25.9446	21.875	5.61495	23.9449	825898	529018	958624	529999	457282	768086	1.55172e+06	1.36669e+06	1.45896e+06	439563	615432	771180	585122	1.45912e+06	527498	219968	162569	92513.3	124358	1.46196	1.10924	2.76612	0.547902	0.149573	1.46786	0.261422	0.703874	0.00226308
	C26 H28 O6	436.185	16.374	9.55108e+06	264079	291948	76163.1	441504	1.48198e+06	147123	870838	9.55108e+06	142684	525654	3.08267e+06	55.6962	101.611	148.64	100.217	330967	291948	82677.1	525298	1.69953e+06	188354	1.20011e+06	1.14457e+07	167016	698133	4.07219e+06	235197	804395	4.27094e+06	2.38516e+06	133519	793308	6.23496e+06	2.38582e+06	0.0986085	0.337249	1.79063	-3.34214	-1.56811	0.840466	0.186841	0.33791	0.721447
		435.871	1.497	1.18964e+07	7.94226e+06	9.42394e+06	1.18964e+07	1.01942e+07	1.0372e+07	9.93008e+06	7.99835e+06	7.84776e+06	9.59523e+06	9.26749e+06	6.98059e+06	20.48	2.18738	11.4187	19.905	9.95392e+06	9.42394e+06	1.29139e+07	1.2129e+07	1.18946e+07	1.2713e+07	1.10226e+07	9.40451e+06	1.12315e+07	1.23084e+07	9.22131e+06	1.07639e+07	1.22455e+07	1.05529e+07	1.07648e+07	1.88068e+06	421473	999998	2.18288e+06	0.999914	1.13755	0.98031	-0.00012469	0.185928	-0.0286893	0.999623	0.302622	0.886939
		433.897	16.357	4.6753e+06	3.00968e+06	2.20562e+06	4.6753e+06	2.97823e+06	2.31623e+06	3.69125e+06	3.53066e+06	2.63996e+06	3.48366e+06	3.28274e+06	3.63074e+06	38.207	22.9588	15.5753	7.11853	3.772e+06	2.20562e+06	5.07516e+06	3.54347e+06	2.65625e+06	4.72574e+06	4.86563e+06	3.16364e+06	4.07774e+06	4.35989e+06	4.79618e+06	3.68426e+06	3.64182e+06	4.03567e+06	4.57803e+06	1.43678e+06	1.03824e+06	851774	308509	0.804769	0.795499	0.88153	-0.313353	-0.330069	-0.181919	0.469787	0.321697	0.468599
		433.753	15.114	443839	443839	335779	146488	313522	437458	88749.6	205657	278992	120027	284141	296273	48.7568	63.1516	39.4732	2.95595	556257	335779	159017	373025	501676	113622	283418	334334	140495	377374	391375	350351	329441	252749	384374	199021	197664	100493	9899.72	0.911484	0.857084	0.65756	-0.133711	-0.222491	-0.604805	0.833438	0.734197	0.177882
		433.245	15.152	384155	94541.1	10362.5	384155	27694.4	24536.8	327146	291594	67109.3	379478	42114.2	57034.8	120.28	137.441	65.4658	21.2821	118487	10362.5	417010	32950.5	28138.8	418829	401848	80421.6	444192	55932.8	75342.6	181953	159973	308821	65637.7	210622	224189	198929	13724.8	2.77208	2.43721	4.70492	1.47097	1.28523	2.23417	0.512879	0.61216	0.199916
		430.918	16.29	578053	87926	267058	540088	9481.66	96005.5	432180	578053	236344	429693	87322.2	370088	76.3179	124.593	41.3186	87.4251	110196	267058	586279	11281.2	110099	553300	796620	283227	502971	115975	488884	321178	224893	527606	302429	242612	288668	257581	263687	1.06199	0.743623	1.74456	0.0867748	-0.427357	0.802863	0.93966	0.781888	0.412168
	C24 H30 O7	430.198	16.017	4.40366e+06	4.33075e+06	4.40366e+06	3.67511e+06	1.43561e+06	3.39655e+06	2.68249e+06	3.31967e+06	3.54871e+06	3.13848e+06	3.71462e+06	3.02982e+06	9.70007	39.621	6.1631	14.3593	5.42767e+06	4.40366e+06	3.98943e+06	1.70808e+06	3.89516e+06	3.43426e+06	4.57486e+06	4.25265e+06	3.6737e+06	4.93348e+06	4.00238e+06	4.60692e+06	3.0125e+06	4.16707e+06	4.46793e+06	740354	1.15293e+06	456634	658386	1.03111	0.67425	0.932663	0.0441971	-0.568643	-0.100572	0.844819	0.214338	0.579758
	C24 H30 O7	430.198	18.245	2.76381e+06	2.73189e+06	1.48412e+06	1.37082e+06	624083	121310	2.41144e+06	1.40961e+06	291277	2.76381e+06	2.20365e+06	1.95131e+06	40.5546	114.382	83.1953	8.58854	3.42384e+06	1.48412e+06	1.48806e+06	742528	139118	3.08726e+06	1.94259e+06	349057	3.23513e+06	2.92671e+06	2.57767e+06	2.13201e+06	1.32297e+06	1.84226e+06	2.75219e+06	1.11877e+06	1.55742e+06	1.44565e+06	246806	0.774657	0.480696	0.669379	-0.36837	-1.0568	-0.579104	0.515663	0.308459	0.463358
		429.905	1.396	1.35392e+07	8.57202e+06	1.35392e+07	9.49449e+06	9.63996e+06	1.04572e+07	8.17495e+06	6.96165e+06	8.33993e+06	7.99046e+06	8.7263e+06	7.89107e+06	25.0784	12.2703	9.22848	7.10817	1.07432e+07	1.35392e+07	1.03065e+07	1.14695e+07	1.19923e+07	1.0466e+07	9.59391e+06	9.99431e+06	9.35312e+06	1.15896e+07	1.04241e+07	1.15296e+07	1.13093e+07	9.64711e+06	1.10068e+07	1.75396e+06	775684	323889	824160	1.0475	1.02748	0.876466	0.0669465	0.0391097	-0.19023	0.729588	0.703896	0.0715703
		429.864	1.546	1.09287e+06	544261	440117	365452	328197	368157	267141	473307	590157	1.09287e+06	407860	181535	19.96	15.8403	45.7998	54.3052	682115	440117	396708	390486	422202	342008	652269	707225	1.27924e+06	541688	239806	506313	384898	879579	390747	153788	40387.7	347208	213463	1.29576	0.985031	2.25102	0.373794	-0.0217583	1.17058	0.523802	0.963103	0.181649
		429.235	14.037	1.29935e+07	1.00388e+07	9.15573e+06	1.29935e+07	8.83564e+06	8.95309e+06	1.13273e+07	8.15155e+06	8.34831e+06	9.43859e+06	7.96877e+06	8.67847e+06	18.7327	14.4855	8.01848	6.029	1.25815e+07	9.15573e+06	1.41047e+07	1.05126e+07	1.02674e+07	1.45018e+07	1.12337e+07	1.00043e+07	1.10482e+07	1.05835e+07	1.14642e+07	1.19473e+07	1.17606e+07	1.07621e+07	1.10239e+07	2.53472e+06	2.3771e+06	662748	622747	1.08377	1.06683	0.976255	0.116058	0.0933293	-0.0346706	0.66305	0.710086	0.688822
		428.917	16.415	1.12898e+06	1.12898e+06	838196	321037	1.00205e+06	781041	42879.8	842424	667355	5405.29	1.02518e+06	714909	53.6517	82.5234	87.4111	25.2168	1.41493e+06	838196	348494	1.19223e+06	895697	54897	1.16095e+06	799737	6327.08	1.36157e+06	944391	867207	714276	655672	1.15298e+06	533809	589974	590640	294991	0.752143	0.619504	0.568675	-0.410921	-0.690815	-0.814323	0.551383	0.416306	0.364924
		428.227	14.087	294651	212842	65107.6	294651	166179	170327	257033	187345	197070	245742	159226	203365	60.9529	25.9287	14.8954	17.2154	266752	65107.6	319852	197718	195331	329067	258182	236162	287650	211472	268644	217237	240705	260665	240058	134397	76532.5	25833.2	40426.6	0.904936	1.0027	1.08584	-0.144113	0.00388435	0.118812	0.837978	0.992187	0.524861
	C24 H28 O7	428.182	17.032	1.13501e+06	617889	415274	14760	730395	772313	909690	948254	926696	1.13501e+06	600127	638873	87.8676	11.6632	11.4175	4.42254	774393	415274	16022.4	869017	885688	1.16463e+06	1.3068e+06	1.11052e+06	1.32857e+06	797042	843948	401896	973113	1.24863e+06	820495	379362	166071	120098	33167.1	0.489822	1.18601	1.5218	-1.02967	0.246112	0.605778	0.236034	0.309346	0.0182829
	C24 H28 O7	428.182	18.915	2.2371e+06	823508	55311.3	1.35401e+06	1.21279e+06	54121.8	2.2371e+06	556519	1.38863e+06	1.58694e+06	1.20264e+06	389956	87.7314	93.5081	46.437	72.1656	1.03209e+06	55311.3	1.46981e+06	1.44296e+06	62066.8	2.86405e+06	766944	1.66408e+06	1.85756e+06	1.59725e+06	515129	852405	1.45636e+06	1.42953e+06	1.05619e+06	724167	1.40104e+06	581914	765173	0.807057	1.37888	1.35348	-0.309257	0.463499	0.436674	0.782068	0.744406	0.573193
	C22 H20 O9	428.11	16.769	1.20298e+06	696491	688161	1.20298e+06	394461	299939	209554	272436	187120	168963	178111	133556	34.1844	30.6856	26.3714	20.2172	872902	688161	1.30587e+06	469326	343970	268282	375446	224238	197777	236553	176426	955643	360526	265820	206490	317055	101539	95856.2	42515.9	4.62804	1.74598	1.28733	2.2104	0.804034	0.364383	0.0510309	0.146053	0.486025
	C27 H38 O4	426.272	15.847	852541	637091	535895	852541	577244	555017	769928	582221	600521	661762	550058	639601	23.9526	18.6395	6.77545	10.6445	798458	535895	925456	686800	636493	985702	802364	719644	774616	730544	844910	753269	769665	765541	787727	198673	188777	42099.7	80868.5	0.956257	0.977071	0.971836	-0.0645297	-0.0334654	-0.0412153	0.83742	0.90999	0.703293
		424.855	1.813	6.75754e+06	1.43813e+06	2.62695e+06	2.32825e+06	1.71643e+06	6.75754e+06	2.38228e+06	2.95833e+06	2.92469e+06	2.38281e+06	1.8388e+06	2.56996e+06	29.0196	75.6776	11.7232	23.4539	1.80239e+06	2.62695e+06	2.52738e+06	2.0422e+06	7.74955e+06	3.04992e+06	4.0769e+06	3.50486e+06	2.78916e+06	2.44215e+06	3.3949e+06	2.31891e+06	4.28055e+06	3.45697e+06	2.91852e+06	450075	3.04619e+06	645204	673700	0.794548	1.46668	1.18449	-0.331794	0.552559	0.24427	0.307164	0.595103	0.434114
		423.869	16.343	3.16582e+06	1.64084e+06	67485.8	3.16582e+06	1.44704e+06	1.36518e+06	2.38832e+06	1.68879e+06	1.61359e+06	2.37343e+06	1.72772e+06	2.15647e+06	95.354	32.7977	22.1298	15.6108	2.05644e+06	67485.8	3.43658e+06	1.72168e+06	1.56559e+06	3.05765e+06	2.32734e+06	1.93367e+06	2.77819e+06	2.29462e+06	2.84869e+06	1.8535e+06	2.11497e+06	2.3464e+06	2.57165e+06	1.69369e+06	820104	422582	391785	0.720744	0.822417	0.912408	-0.472441	-0.282058	-0.132248	0.613722	0.530098	0.591922
		423.869	16.502	1.32697e+06	1.06358e+06	1.30107e+06	119026	1.12291e+06	1.29466e+06	10684.4	831598	1.11739e+06	36159.4	1.29137e+06	1.32697e+06	75.5262	86.1154	84.6702	1.92259	1.33297e+06	1.30107e+06	129206	1.33603e+06	1.48471e+06	13678.7	1.14603e+06	1.33904e+06	42325.9	1.7151e+06	1.75291e+06	921081	944807	842467	1.73401e+06	685970	809800	699630	26739.9	0.531187	0.54487	0.48585	-0.912708	-0.876017	-1.04142	0.210201	0.282325	0.185978
		421.874	1.642	1.75592e+06	1.51094e+06	1.51552e+06	1.46091e+06	1.35167e+06	1.30923e+06	1.68508e+06	1.20534e+06	1.22124e+06	1.75592e+06	1.24338e+06	1.49422e+06	2.02503	14.2091	22.4786	12.9578	1.89364e+06	1.51552e+06	1.58586e+06	1.6082e+06	1.50142e+06	2.15732e+06	1.66109e+06	1.4635e+06	2.05537e+06	1.65137e+06	1.97385e+06	1.66501e+06	1.75565e+06	1.72665e+06	1.81261e+06	201103	351933	301335	228033	0.918568	0.968575	0.952578	-0.122541	-0.0460644	-0.0700902	0.498264	0.856122	0.758019
		420.879	1.587	2.76321e+06	2.17208e+06	2.34082e+06	2.76321e+06	2.27531e+06	2.04996e+06	2.47563e+06	1.8961e+06	2.03471e+06	2.36798e+06	2.35928e+06	2.11749e+06	12.5548	9.39382	11.5518	7.63821	2.72224e+06	2.34082e+06	2.99954e+06	2.70714e+06	2.3509e+06	3.16943e+06	2.61303e+06	2.43833e+06	2.77181e+06	3.13341e+06	2.79719e+06	2.68753e+06	2.74249e+06	2.60772e+06	2.9653e+06	330729	410409	166803	237746	0.906328	0.92486	0.879413	-0.141895	-0.112693	-0.185388	0.389159	0.548584	0.135901
	C22 H44 O7	420.309	17.728	890972	28786	7442.4	890972	9359.39	7820.14	877515	9439.4	8671.04	705181	10996.4	109869	163.09	168.217	166.7	115.688	36077.1	7442.4	967174	11135.7	8968.13	1.12344e+06	13008.5	10391.1	825440	14604.6	145136	336898	381181	282946	79870.1	546023	642816	469815	92299.4	4.21807	4.77251	3.54258	2.07658	2.25475	1.8248	0.575084	0.575903	0.605937
		415.853	1.513	928387	411010	30208.4	324583	666784	612567	440237	444602	708065	382228	565388	928387	78.2081	20.6376	33.8039	34.3665	515113	30208.4	352343	793333	702492	563615	612709	848522	447411	750905	1.22639e+06	299222	686480	636214	988650	246778	115693	201586	336222	0.302657	0.694361	0.643518	-1.72425	-0.526242	-0.635947	0.0738301	0.222742	0.226552
		415.219	13.419	3.36752e+06	2.85224e+06	2.1496e+06	3.36752e+06	2.16875e+06	2.08008e+06	2.88288e+06	2.237e+06	1.95624e+06	2.42942e+06	2.46276e+06	2.08258e+06	21.9141	18.5147	10.7794	11.8288	3.57467e+06	2.1496e+06	3.65554e+06	2.58036e+06	2.38543e+06	3.69081e+06	3.08283e+06	2.34429e+06	2.84372e+06	3.27084e+06	2.75107e+06	3.1266e+06	2.88553e+06	2.75695e+06	3.01096e+06	847073	704170	376839	367537	1.03841	0.958345	0.915639	0.054374	-0.0613833	-0.127149	0.872145	0.837015	0.510611
	C24 H30 O6	414.203	16.968	3.59163e+07	3.10927e+06	2.11147e+06	2.74097e+06	1.65656e+06	5.04002e+06	1.58018e+06	4.31246e+06	3.59163e+07	1.57553e+06	1.74247e+06	9.10298e+06	19.0122	71.6172	136.965	95.9789	3.89681e+06	2.11147e+06	2.9754e+06	1.97096e+06	5.77989e+06	2.02303e+06	5.94303e+06	4.3041e+07	1.84422e+06	2.31421e+06	1.2025e+07	2.99456e+06	3.25796e+06	1.69427e+07	7.1696e+06	892823	2.18421e+06	2.26945e+07	6.86656e+06	0.417675	0.454413	2.36314	-1.25955	-1.13792	1.2407	0.338991	0.39695	0.611579
	C24 H30 O6	414.203	19.577	2.32806e+07	59102.8	54456.6	2.32806e+07	72653.4	62963	3.31276e+06	61693	50418.6	78158.3	58987.7	44086.4	171.944	162.988	21.9959	20.445	74072.7	54456.6	2.52717e+07	86442.3	72205.9	4.24117e+06	85019.6	60420.1	91487	78342.9	58237.9	8.46675e+06	1.46661e+06	78975.6	68290.4	1.45535e+07	2.40285e+06	16391.7	14216.3	123.982	21.476	1.15647	6.95398	4.42466	0.209724	0.495215	0.491894	0.510045
	C24 H30 O6	414.203	15.801	6.26871e+07	1.93052e+06	1.66568e+06	654558	1.74239e+07	6.26871e+07	1.76096e+06	3.30859e+07	2.82537e+06	2.00814e+06	3.52277e+07	3.37048e+07	47.5237	115.933	140.125	3.12428	2.4195e+06	1.66568e+06	710540	2.07307e+07	7.18895e+07	2.25447e+06	4.55959e+07	3.38583e+06	2.35059e+06	4.67867e+07	4.45239e+07	1.59857e+06	3.16249e+07	1.71108e+07	4.56553e+07	856452	3.60732e+07	2.46743e+07	1.60005e+06	0.0350139	0.692689	0.374782	-4.83593	-0.52972	-1.41588	3.04495e-05	0.638031	0.218816
		413.889	1.53	2.39206e+07	1.74485e+07	2.29271e+07	2.39206e+07	1.97363e+07	1.8864e+07	2.11715e+07	1.72373e+07	1.86204e+07	2.05674e+07	1.79857e+07	1.82756e+07	16.2627	5.84789	8.89472	1.13081	2.1868e+07	2.29271e+07	2.59664e+07	2.3482e+07	2.16333e+07	2.71049e+07	2.37549e+07	2.23141e+07	2.40748e+07	2.38872e+07	2.4142e+07	2.35872e+07	2.40734e+07	2.33813e+07	2.40146e+07	2.12745e+06	2.78334e+06	937946	180173	0.982201	1.00245	0.973628	-0.0259093	0.00352844	-0.0385582	0.805321	0.979188	0.435515
		411.229	18.426	1.71118e+06	1.67412e+06	1.71118e+06	8520.71	132819	4076.02	11508.2	346687	86372.2	37385.9	1.31373e+06	1.29232e+06	85.9659	146.115	106.015	1.16217	2.09815e+06	1.71118e+06	9249.46	158027	4674.37	14733.4	477773	103506	43761.5	1.7448e+06	1.70714e+06	1.27286e+06	59145	208347	1.72597e+06	1.11129e+06	85782	235234	26626.5	0.737475	0.0342677	0.120713	-0.439334	-4.86701	-3.05035	0.62247	0.000132839	0.00327431
		406.891	1.31	1.26313e+06	618668	688000	1.26313e+06	633614	637934	943081	798282	844280	1.14999e+06	717507	757292	41.299	24.0361	20.5371	3.81508	775368	688000	1.37116e+06	753868	731582	1.20738e+06	1.10012e+06	1.01176e+06	1.3461e+06	952937	1.00038e+06	944841	897611	1.15266e+06	976658	371775	268501	173255	33545.9	0.967423	0.919064	1.18021	-0.0477808	-0.121763	0.239043	0.916014	0.720283	0.269749
		405.9	1.758	4.31361e+06	3.50342e+06	1.66658e+06	4.31361e+06	1.90113e+06	3.02298e+06	1.58493e+06	1.52508e+06	2.90376e+06	2.03945e+06	1.43285e+06	2.50177e+06	42.9043	34.8301	32.3132	38.4199	4.39079e+06	1.66658e+06	4.68254e+06	2.26195e+06	3.46675e+06	2.02911e+06	2.10172e+06	3.47977e+06	2.38725e+06	1.903e+06	3.30482e+06	3.57997e+06	2.58594e+06	2.65625e+06	2.60391e+06	1.66345e+06	771639	727342	991237	1.37484	0.993097	1.0201	0.459266	-0.00999403	0.0287087	0.52064	0.982995	0.948956
		404.892	1.867	5.88304e+06	3.36689e+06	5.15767e+06	5.88304e+06	3.7654e+06	5.38551e+06	2.21341e+06	3.72554e+06	4.59302e+06	5.69524e+06	2.43961e+06	4.28325e+06	26.9674	41.8725	21.1329	38.7825	4.21968e+06	5.15767e+06	6.3862e+06	4.48004e+06	6.17609e+06	2.83372e+06	5.1342e+06	5.50413e+06	6.66647e+06	3.24011e+06	5.65815e+06	5.25451e+06	4.49662e+06	5.76827e+06	4.44913e+06	1.0865e+06	1.67125e+06	799557	1.70981e+06	1.18102	1.01067	1.29649	0.240034	0.0153173	0.374615	0.553746	0.977299	0.309298
		403.892	1.322	5.4242e+06	2.62731e+06	2.74175e+06	5.4242e+06	2.73407e+06	2.98641e+06	4.05824e+06	2.19266e+06	2.20448e+06	3.14647e+06	2.88647e+06	3.13787e+06	43.9936	21.5696	21.7656	5.90159	3.29278e+06	2.74175e+06	5.88811e+06	3.25297e+06	3.42481e+06	5.19557e+06	3.02173e+06	2.64178e+06	3.68306e+06	3.83359e+06	4.14511e+06	3.97421e+06	3.95779e+06	3.11552e+06	3.98935e+06	1.68023e+06	1.07539e+06	526938	220278	0.996207	0.992089	0.78096	-0.0054825	-0.0114587	-0.356679	0.991156	0.971365	0.122594
		400.898	1.776	3.34966e+06	2.87034e+06	2.00369e+06	3.104e+06	2.83494e+06	1.9343e+06	1.98961e+06	2.39599e+06	3.17729e+06	3.34966e+06	1.4165e+06	1.89064e+06	21.7989	22.4051	17.0865	20.2755	3.59735e+06	2.00369e+06	3.36947e+06	3.37299e+06	2.21826e+06	2.5472e+06	3.30193e+06	3.80756e+06	3.92089e+06	1.88129e+06	2.49753e+06	2.99017e+06	2.71281e+06	3.67679e+06	2.18941e+06	861885	594913	329551	435750	1.36574	1.23906	1.67936	0.449687	0.30925	0.747908	0.325199	0.371571	0.0214596
	C22 H40 O6	400.279	15.976	1.07158e+06	217217	984321	1.07158e+06	9916.53	11361.9	64197.5	10187.8	8499.32	50879.8	11992.6	10200.8	62.0434	108.558	103.479	11.4176	272236	984321	1.16323e+06	11798.6	13029.8	82189	14039.9	10185.3	59556.6	15927.6	13475.2	806596	35672.5	27927.3	14701.4	471336	40289.2	27459.5	1734.11	54.8654	2.42647	1.89964	5.77782	1.27886	0.925723	0.109523	0.535404	0.564541
		399.892	1.587	2.35355e+06	1.80202e+06	434365	1.53242e+06	2.04743e+06	2.35355e+06	1.37901e+06	1.59851e+06	1.96885e+06	1.3497e+06	1.96273e+06	1.85185e+06	57.6662	25.8668	19.0087	4.11087	2.25845e+06	434365	1.66349e+06	2.43601e+06	2.69905e+06	1.76548e+06	2.20292e+06	2.3594e+06	1.57987e+06	2.60674e+06	2.44628e+06	1.4521e+06	2.30018e+06	2.0474e+06	2.52651e+06	930234	481376	412382	113468	0.574745	0.910418	0.810366	-0.799005	-0.135399	-0.303355	0.220318	0.577884	0.223493
		398.897	1.595	2.88034e+07	2.13482e+07	2.88034e+07	2.36872e+07	2.42457e+07	2.59176e+07	2.39852e+07	2.10227e+07	2.45758e+07	2.09974e+07	2.59358e+07	2.40603e+07	15.4913	4.24253	9.27404	5.30506	2.67554e+07	2.88034e+07	2.57131e+07	2.88473e+07	2.97223e+07	3.07072e+07	2.89715e+07	2.94508e+07	2.45782e+07	3.4446e+07	3.17836e+07	2.70906e+07	2.97589e+07	2.76668e+07	3.31148e+07	1.5722e+06	930457	2.68553e+06	1.88259e+06	0.818083	0.89866	0.835483	-0.289681	-0.154152	-0.259317	0.0294609	0.0694445	0.092621
	C21 H18 O8	398.099	16.071	565953	330035	80518.2	565953	4729.42	5041.73	5637.09	5791.91	4951.48	5433.52	5286.33	5942.7	74.5768	8.97833	7.82095	8.26662	413628	80518.2	614357	5627.02	5781.85	7216.9	7981.88	5933.69	6360.13	7020.89	7850.28	369501	6208.59	6758.57	7435.58	269641	876.649	1080.66	586.467	49.6936	0.834984	0.908949	5.63499	-0.26018	-0.137729	0.169423	0.188174	0.48988
		395.901	1.844	1.2216e+06	1.2216e+06	1.16658e+06	937762	526807	1.1551e+06	796448	823491	982594	818355	612701	738882	13.5776	38.1536	10.6738	13.2029	1.53102e+06	1.16658e+06	1.01797e+06	626791	1.32466e+06	1.01966e+06	1.13486e+06	1.17751e+06	957913	813742	976059	1.23852e+06	990370	1.09009e+06	894900	263982	349857	116441	114776	1.38398	1.10668	1.21812	0.46882	0.146241	0.284653	0.193653	0.744971	0.162216
		395.894	16.384	1.23935e+06	1.18831e+06	1.08376e+06	1.16449e+06	1.03178e+06	1.06247e+06	957090	1.2121e+06	1.23935e+06	860363	790233	875451	4.78368	5.32872	19.148	7.23528	1.48929e+06	1.08376e+06	1.26408e+06	1.2276e+06	1.21844e+06	1.22532e+06	1.67041e+06	1.4852e+06	1.00708e+06	1.04953e+06	1.15647e+06	1.27904e+06	1.22379e+06	1.38756e+06	1.103e+06	203182	4770.55	342271	75617.8	1.15961	1.10951	1.258	0.213639	0.149924	0.331127	0.342766	0.0568121	0.350905
		393.263	17.718	658605	12774.7	5484.65	658605	9096.76	8138.55	515989	12748.9	10605.5	367198	9263.25	9014.09	166.204	164.808	157.671	1.92787	16010.4	5484.65	714933	10823.2	9333.28	660596	17569.4	12709.2	429818	12302.7	11907.6	245476	226917	153366	12105.1	406596	375577	239427	279.428	20.2787	18.7455	12.6695	4.34189	4.22848	3.66328	0.49735	0.498734	0.48643
		389.927	1.796	4.00543e+06	2.57419e+06	2.11302e+06	2.12918e+06	1.1955e+06	4.00543e+06	2.06302e+06	2.88362e+06	1.20796e+06	1.58009e+06	2.1574e+06	2.38218e+06	11.5186	59.4231	46.5427	7.0025	3.2262e+06	2.11302e+06	2.31128e+06	1.4224e+06	4.59343e+06	2.64118e+06	3.97394e+06	1.44758e+06	1.84955e+06	2.8653e+06	3.14685e+06	2.55017e+06	2.88567e+06	2.42369e+06	3.00607e+06	593796	1.59959e+06	1.35752e+06	199087	0.848338	0.959947	0.806264	-0.237288	-0.0589727	-0.310675	0.390051	0.926217	0.607073
	C12 H2 O15	385.942	1.382	1.29976e+07	8.58575e+06	1.29976e+07	1.07235e+07	9.69405e+06	1.12864e+07	8.99817e+06	7.58985e+06	7.46894e+06	9.08228e+06	8.87346e+06	7.76192e+06	20.4875	11.7387	11.1668	9.44952	1.07604e+07	1.29976e+07	1.16406e+07	1.15339e+07	1.29433e+07	1.15199e+07	1.04596e+07	8.95053e+06	1.06311e+07	1.1785e+07	1.02534e+07	1.17995e+07	1.1999e+07	1.00138e+07	1.10192e+07	1.12704e+06	817760	924770	1.08301e+06	1.07081	1.08892	0.908752	0.0987046	0.122892	-0.138041	0.498254	0.32535	0.343011
		384.878	1.227	941217	534500	563613	646525	537324	586916	847305	481266	687790	941217	565646	712298	9.99507	25.3367	32.7503	16.229	669882	563613	701820	639303	673075	1.08476e+06	663237	824225	1.10173e+06	751247	940941	645105	799047	863063	846094	72358.6	248014	221810	134134	0.76245	0.944395	1.02006	-0.391285	-0.0825374	0.0286479	0.108888	0.827414	0.930763
		380.883	1.148	1.57057e+06	668237	1.57057e+06	1.43999e+06	717653	598238	1.19964e+06	571610	597433	1.32824e+06	487980	442167	39.7676	37.9716	51.6058	6.96547	837492	1.57057e+06	1.56315e+06	853858	686059	1.53584e+06	787741	715944	1.55475e+06	648098	584101	1.32373e+06	1.02525e+06	1.01948e+06	616099	421115	450073	464949	45252.8	2.14857	1.6641	1.65473	1.10338	0.734746	0.726599	0.110142	0.310743	0.329547
		379.929	1.691	1.21003e+06	903927	121344	1.21003e+06	908336	642468	1.08287e+06	911459	748407	680185	1.00527e+06	1.11908e+06	75.3526	25.2621	15.2347	7.5766	1.13288e+06	121344	1.31352e+06	1.08073e+06	736781	1.38635e+06	1.25609e+06	896867	796181	1.33512e+06	1.4783e+06	855913	1.06795e+06	983046	1.40671e+06	642535	324972	241763	101242	0.608449	0.759183	0.698825	-0.716792	-0.39748	-0.516998	0.335982	0.265379	0.109497
		379.867	1.351	1.22771e+06	787827	1.22771e+06	725274	591697	631295	637766	804835	465697	1.08604e+06	333449	1.00639e+06	29.971	4.02103	39.5434	71.0297	987373	1.22771e+06	787304	703996	723969	816502	1.10915e+06	558076	1.27125e+06	442861	1.32944e+06	1.0008e+06	748156	979492	886149	220510	60026.1	373848	626904	1.12938	0.844277	1.10534	0.175526	-0.244212	0.144484	0.776385	0.706778	0.842869
		378.933	1.652	480968	271962	152175	480968	20745.6	30633.1	217757	180471	18332.8	176753	84753	249878	55.1544	123.73	73.9349	69.7849	340847	152175	522104	24682.9	35130	278785	248708	21969.5	206895	112562	330087	338375	112866	159191	221325	184977	143785	120662	153813	1.52886	0.509956	0.719264	0.612459	-0.971556	-0.475406	0.517255	0.478655	0.643236
	C20 H42 O6	378.297	16.682	7.09607e+06	7.09607e+06	4.27555e+06	2.25589e+06	145443	125863	291081	77016	106406	439692	133017	97393.3	53.5191	48.1531	96.9856	21.865	8.89341e+06	4.27555e+06	2.44883e+06	173047	144339	372658	106136	127513	514675	176663	128656	5.20593e+06	230015	249441	152659	3.3215e+06	124363	229947	33945.8	34.1016	1.50672	1.63398	5.09177	0.591411	0.708386	0.133906	0.472598	0.613593
		376.738	14.708	715119	715119	539974	140939	448824	469245	409962	431637	421586	109382	440393	427202	63.2382	6.80311	57.1019	2.1502	896249	539974	152993	534007	538129	524854	594843	505215	128035	584896	564331	529739	532330	409364	574613	371734	6794.45	247726	14541.5	0.921904	0.926415	0.712417	-0.117311	-0.11027	-0.489206	0.881676	0.019279	0.437106
		375.251	18.358	1.88113e+08	1.80143e+08	1.23575e+08	1.88113e+08	1.61606e+06	224934	2.80871e+07	6.89314e+07	632655	1.36512e+08	1.11992e+08	7.6297e+07	21.4627	157.378	98.9052	26.8098	2.25771e+08	1.23575e+08	2.04202e+08	1.92278e+06	257954	3.59586e+07	9.49949e+07	758153	1.59792e+08	1.48739e+08	1.00788e+08	1.84516e+08	1.27131e+07	8.51817e+07	1.24763e+08	5.38671e+07	2.01484e+07	7.99698e+07	3.39063e+07	1.47893	0.101898	0.682747	0.564554	-3.29481	-0.550577	0.267111	0.0172057	0.569931
		373.95	1.776	1.06211e+06	241406	456316	396078	270861	632642	401578	828904	1.06211e+06	762102	447858	544125	30.4057	42.1114	17.81	13.7242	302550	456316	429953	322267	725514	514121	1.14232e+06	1.2728e+06	892067	594810	718786	396273	520634	1.10239e+06	656798	82229.5	201702	193479	87663.8	0.603341	0.792685	1.67844	-0.728955	-0.33518	0.747118	0.0426403	0.450316	0.0603854
		371.23	13.954	242086	157960	117879	184886	163247	129324	173471	161251	192440	166860	242086	149375	21.9554	14.8757	9.58174	33.4931	197969	117879	200699	194230	148309	222086	222222	230614	195316	321520	197324	172182	188208	216051	259422	47047.8	37255.4	18440.7	87819.7	0.663716	0.725492	0.832817	-0.591362	-0.462968	-0.263929	0.230024	0.278708	0.43524
		369.831	1.536	783793	269776	216968	561005	387807	331020	546131	241451	320274	783793	374037	219638	53.0499	26.4382	65.3346	36.7798	338107	216968	608986	461410	379614	699185	332746	383805	917458	496766	290141	388020	513403	544670	393454	200719	166009	323852	146106	0.986191	1.30486	1.38433	-0.0200608	0.383898	0.469188	0.976269	0.470814	0.592667
		363.89	1.553	593045	522223	133482	593045	523663	456430	568894	414786	407582	528080	491863	506184	59.443	10.96	15.0142	2.02924	654495	133482	643766	623049	523434	728329	571620	488432	618137	653254	668665	477247	624937	559396	660960	297758	102461	65710.3	10897.5	0.722052	0.9455	0.84634	-0.469825	-0.0808512	-0.240691	0.468635	0.670182	0.131552
		363.859	1.206	391341	234008	216062	391341	268150	274684	352756	241002	313778	388668	256900	267241	34.3833	15.7687	23.4785	2.79031	293279	216062	424811	319043	315008	451616	332126	376022	454949	341194	353024	311384	361889	387699	347109	105545	77732.4	62238.7	8364.91	0.897078	1.04258	1.11694	-0.156694	0.0601584	0.159548	0.681042	0.815654	0.447827
		363.18	12.949	156166	144602	138755	11741.1	136830	121726	2980.77	91505.9	96061.8	26973.9	156166	154880	76.3234	84.0889	54.0315	0.584461	181227	138755	12745.3	162799	139596	3816.14	126105	115117	31573.8	207407	204596	110909	102070	90932.1	206001	87624.7	85877.9	51698.5	1987.93	0.53839	0.495484	0.441415	-0.893275	-1.01309	-1.17979	0.241468	0.202951	0.058359
		361.918	1.398	1.0289e+07	6.30336e+06	1.0289e+07	7.11587e+06	7.39307e+06	7.61078e+06	6.09048e+06	5.22264e+06	5.6021e+06	5.98569e+06	6.44509e+06	5.96297e+06	26.6506	11.6923	6.80869	5.49501	7.89991e+06	1.0289e+07	7.72447e+06	8.79621e+06	8.72804e+06	7.79736e+06	7.19737e+06	6.71337e+06	7.00646e+06	8.55987e+06	7.87704e+06	8.63781e+06	8.44054e+06	6.9724e+06	8.21845e+06	1.4327e+06	558052	243790	482830	1.05103	1.02702	0.848383	0.0717981	0.0384676	-0.237212	0.727912	0.679731	0.0282862
		361.862	1.22	1.60662e+06	881258	1.09851e+06	1.04584e+06	928031	1.19314e+06	1.23013e+06	998946	1.11155e+06	1.60662e+06	1.11806e+06	1.10439e+06	11.2371	14.7508	26.091	0.869751	1.10447e+06	1.09851e+06	1.13529e+06	1.10416e+06	1.36829e+06	1.57488e+06	1.37666e+06	1.33204e+06	1.88061e+06	1.48492e+06	1.4589e+06	1.11276e+06	1.34911e+06	1.52977e+06	1.47191e+06	19738.2	235944	304654	18403.1	0.755995	0.916572	1.03931	-0.403551	-0.12568	0.0556241	0.000258232	0.535846	0.81551
		359.863	1.237	1.82579e+06	1.07214e+06	1.1386e+06	216670	1.15097e+06	1.18249e+06	1.54237e+06	1.22855e+06	1.39632e+06	1.82579e+06	1.32352e+06	1.34041e+06	63.5451	16.8311	20.7627	0.89682	1.3437e+06	1.1386e+06	235201	1.36941e+06	1.35608e+06	1.97462e+06	1.69308e+06	1.6733e+06	2.13715e+06	1.7578e+06	1.77068e+06	905836	1.56671e+06	1.83451e+06	1.76424e+06	589772	353330	262279	9108.27	0.513443	0.888035	1.03983	-0.961723	-0.171311	0.0563486	0.1459	0.507751	0.743139
		359.23	12.673	162236	30010.9	1633.54	6655.89	70514.9	913.483	162236	140817	50212.4	142151	5118.66	124303	118.617	103.885	47.4517	130.235	37612.3	1633.54	7225.14	83897.9	1047.58	207704	194062	60172.9	166393	6798.21	164203	15490.3	97549.7	140209	85500.6	19361.1	104002	70680.5	111302	0.181172	1.14092	1.63986	-2.46457	0.190203	0.713573	0.33036	0.909196	0.537664
		357.867	1.218	2.42063e+06	834348	1.52865e+06	1.44944e+06	867759	1.66783e+06	2.1714e+06	1.68343e+06	1.87214e+06	2.42063e+06	959859	1.32615e+06	29.9067	41.9003	19.2239	22.6603	1.04568e+06	1.52865e+06	1.57341e+06	1.03245e+06	1.91266e+06	2.77993e+06	2.31996e+06	2.24351e+06	2.83343e+06	1.27481e+06	1.75184e+06	1.38258e+06	1.90835e+06	2.46563e+06	1.51332e+06	292620	873749	320811	337310	0.913603	1.26103	1.62928	-0.130361	0.334605	0.704237	0.673819	0.599548	0.0494812
		357.25	14.342	884180	827456	627888	884180	626767	637827	814603	631045	583480	730003	518451	583628	17.2622	15.2078	11.5321	8.36367	1.03704e+06	627888	959801	745721	731460	1.0429e+06	869648	699224	854494	688567	770969	874910	840026	807789	729768	217385	175837	94324.9	58267.5	1.19889	1.15109	1.10691	0.261696	0.202997	0.14654	0.443603	0.472746	0.384051
	C20 H36 O5	356.253	16.448	2.70823e+06	2.70823e+06	226041	405923	32284.3	159187	46466.8	25155.8	27224.9	67461.3	27525.9	29243.8	124.312	87.6728	59.7041	4.27938	3.39419e+06	226041	440640	38411.5	182555	59489.3	34667.5	32625.5	78965.8	36557.8	38630.8	1.35362e+06	93485.4	48752.9	37594.3	1.77044e+06	77853.5	26185.1	1465.86	36.0061	2.48669	1.29682	5.17017	1.31423	0.374974	0.392124	0.406552	0.6078
		355.955	16.367	1.61153e+06	1.34333e+06	1.4091e+06	1.60417e+06	1.19182e+06	1.32461e+06	1.28663e+06	1.39393e+06	1.56904e+06	1.26799e+06	1.29903e+06	1.61153e+06	9.34139	5.39495	10.7204	15.1841	1.68358e+06	1.4091e+06	1.74136e+06	1.41802e+06	1.51906e+06	1.64721e+06	1.92099e+06	1.88028e+06	1.48422e+06	1.72527e+06	2.12882e+06	1.61135e+06	1.5281e+06	1.76183e+06	1.92704e+06	177521	114863	241275	285353	0.836176	0.792977	0.914269	-0.258121	-0.334648	-0.12931	0.213114	0.104482	0.531775
		348.926	1.758	2.50369e+06	1.74151e+06	2.50369e+06	2.32284e+06	1.40869e+06	2.3119e+06	2.45055e+06	1.9406e+06	1.79468e+06	2.42803e+06	2.13573e+06	1.75928e+06	18.1899	27.5035	16.1439	13.6685	2.18261e+06	2.50369e+06	2.5215e+06	1.67604e+06	2.65128e+06	3.13733e+06	2.67435e+06	2.15069e+06	2.8421e+06	2.83651e+06	2.32399e+06	2.4026e+06	2.48822e+06	2.55571e+06	2.58025e+06	190725	744164	360649	362407	0.93115	0.96433	0.990489	-0.102915	-0.0524011	-0.0137875	0.509741	0.885295	0.94536
		347.891	1.241	1.92475e+06	1.26407e+06	1.27803e+06	1.1612e+06	1.16328e+06	1.13151e+06	1.64865e+06	1.44973e+06	1.13574e+06	1.92475e+06	1.39806e+06	1.61307e+06	5.16856	22.0494	26.4225	10.098	1.58424e+06	1.27803e+06	1.26052e+06	1.38406e+06	1.29761e+06	2.11068e+06	1.99789e+06	1.36103e+06	2.25299e+06	1.85679e+06	2.13085e+06	1.37426e+06	1.59745e+06	1.87064e+06	1.99382e+06	182057	446570	459394	193786	0.68926	0.801201	0.938216	-0.53688	-0.319765	-0.0920084	0.0355436	0.337621	0.753035
		347.849	1.613	2.42842e+06	1.46442e+06	1.76182e+06	1.92758e+06	2.23458e+06	2.09122e+06	1.54626e+06	1.82281e+06	1.78609e+06	1.91153e+06	2.42842e+06	1.1973e+06	13.6602	18.5535	3.50468	48.0197	1.83534e+06	1.76182e+06	2.09243e+06	2.65868e+06	2.39821e+06	1.97961e+06	2.51204e+06	2.14039e+06	2.23751e+06	3.22524e+06	1.58163e+06	1.89653e+06	2.3455e+06	2.29665e+06	2.40343e+06	173595	342590	192751	1.16221e+06	0.789092	0.975895	0.955569	-0.341735	-0.0352017	-0.0655688	0.477385	0.935935	0.876022
		345.214	11.734	363000	2905.86	363000	17886.8	5533.64	10301.4	13212.5	2080.73	2818.37	5196.15	3064.1	1729.45	159.237	40.0377	48.3815	39.3752	3641.88	363000	19416.6	6583.87	11813.6	16915.3	2867.47	3377.44	6082.28	4069.5	2284.6	128686	11770.9	4109.06	3177.05	203075	5165.84	1727.78	1262.11	40.5049	3.70499	1.29336	5.34003	1.88947	0.371123	0.467813	0.11524	0.565987
		343.851	1.229	1.88016e+06	849895	1.10253e+06	1.33479e+06	1.01342e+06	1.16162e+06	1.55387e+06	1.08342e+06	1.26346e+06	1.88016e+06	1.22433e+06	1.3133e+06	22.1331	22.4669	29.6547	4.95834	1.06516e+06	1.10253e+06	1.44895e+06	1.20576e+06	1.33215e+06	1.98934e+06	1.49307e+06	1.51409e+06	2.20079e+06	1.62606e+06	1.73486e+06	1.20555e+06	1.50908e+06	1.73598e+06	1.68046e+06	211622	420691	402674	76935	0.717392	0.898019	1.03304	-0.479167	-0.155183	0.0468978	0.0616943	0.625469	0.866228
		343.199	12.642	611147	330426	294495	611147	243557	288130	428660	11022.2	162789	179931	94745.8	116483	42.0802	30.1791	78.843	14.5537	414119	294495	663416	289781	330427	548793	15189.7	195082	210615	125834	153874	457343	389667	140295	139854	188220	139297	108623	19827.2	3.27015	2.78624	1.00316	1.70936	1.47832	0.00454746	0.109246	0.0963954	0.996024
		342.931	16.254	379599	129468	26695.9	379599	85470.6	49380.6	280551	104477	53591.6	299445	147424	113521	101.634	89.8147	85.0943	18.3742	162261	26695.9	412064	101692	56629.6	359176	143981	64222.4	350511	195798	149960	200340	172499	186238	172879	195486	163229	147748	32411.7	1.15885	0.997803	1.07727	0.21269	-0.00317297	0.107385	0.863458	0.997727	0.91216
		341.853	1.218	2.74691e+06	1.65225e+06	1.66846e+06	2.27914e+06	1.64775e+06	1.76332e+06	2.49389e+06	1.83744e+06	1.98446e+06	2.74691e+06	1.35524e+06	2.07052e+06	19.1443	23.3098	22.2967	29.528	2.07074e+06	1.66846e+06	2.47407e+06	1.96047e+06	2.02217e+06	3.19281e+06	2.53219e+06	2.37811e+06	3.21535e+06	1.79992e+06	2.73514e+06	2.07109e+06	2.39182e+06	2.70855e+06	2.26753e+06	402806	694363	445613	661300	0.913367	1.05481	1.19449	-0.130733	0.0769822	0.256397	0.698149	0.854857	0.427206
		340.935	16.293	838610	49928.1	107577	838610	223789	310406	509389	88914.5	275496	647700	59300.4	314461	132.409	42.0966	84.3241	96.546	62574.2	107577	910333	266262	355974	652147	122534	330146	758155	78758.2	415401	360161	424794	403612	247080	476993	201938	324116	238043	1.45767	1.71926	1.63353	0.543667	0.781787	0.707991	0.783806	0.431293	0.605566
		339.856	1.227	2.67773e+06	872404	1.37922e+06	1.96357e+06	1.25254e+06	1.12085e+06	2.32472e+06	1.75198e+06	1.40505e+06	2.67773e+06	1.41925e+06	1.49815e+06	38.8623	42.1658	33.8271	3.82439	1.09337e+06	1.37922e+06	2.1315e+06	1.49026e+06	1.28539e+06	2.97623e+06	2.41442e+06	1.68377e+06	3.13438e+06	1.88494e+06	1.97904e+06	1.5347e+06	1.91729e+06	2.41085e+06	1.93199e+06	536245	922770	725311	66539.4	0.79436	0.992392	1.24786	-0.332134	-0.0110176	0.319455	0.395078	0.984313	0.441838
		337.895	1.474	1.96842e+07	1.36738e+07	1.47849e+07	1.96842e+07	1.40696e+07	1.79347e+07	1.62961e+07	1.21308e+07	1.17378e+07	1.80284e+07	1.21752e+07	1.06294e+07	19.9281	12.0495	25.2325	9.58599	1.71371e+07	1.47849e+07	2.13677e+07	1.67399e+07	2.05675e+07	2.08632e+07	1.67176e+07	1.40663e+07	2.11029e+07	1.61702e+07	1.40414e+07	1.77633e+07	1.93902e+07	1.72956e+07	1.51058e+07	3.33576e+06	2.29998e+06	3.55373e+06	1.50525e+06	1.17592	1.28362	1.14496	0.233794	0.360223	0.1953	0.383524	0.108115	0.486234
	C20 H32 O4	336.227	18.725	5.31349e+06	2.76109e+06	120040	3.94494e+06	26866.2	23525.6	5.31349e+06	691067	27353	3.21469e+06	1.76453e+06	3.06638e+06	86.0598	170.764	128.271	38.1108	3.46043e+06	120040	4.28234e+06	31965.1	26979.1	6.80261e+06	952365	32779	3.7629e+06	2.34351e+06	4.05067e+06	2.62094e+06	2.28719e+06	1.58268e+06	3.19709e+06	2.20448e+06	3.91048e+06	1.9433e+06	1.20714e+06	0.819789	0.715396	0.495039	-0.286676	-0.483185	-1.01439	0.765164	0.780305	0.382624
	C20 H32 O4	336.227	15.163	2.66979e+06	296029	232497	350809	133076	2.00929e+06	375232	2.66979e+06	1.9288e+06	393749	1.62656e+06	1.7147e+06	20.2004	121.608	69.7595	3.73031	371009	232497	380813	158333	2.30425e+06	480392	3.67926e+06	2.31141e+06	460897	2.16028e+06	2.26511e+06	328107	980992	2.15052e+06	2.21269e+06	82944.9	1.15723e+06	1.6152e+06	74125	0.148284	0.443348	0.971904	-2.75357	-1.17349	-0.0411141	0.000128177	0.248984	0.962083
	C17 H20 O7	336.118	13.935	896057	151997	139284	896057	737112	592175	487643	424780	224493	666659	631395	628763	109.48	20.6852	50.4758	0.295328	190496	139284	972693	877009	679106	624306	585392	269025	780348	838570	830593	434158	726807	544922	834581	467088	132933	258053	5640.78	0.52021	0.870864	0.652928	-0.942833	-0.19948	-0.615004	0.333461	0.356481	0.229199
		335.905	1.307	1.88543e+06	806818	1.31577e+06	1.01923e+06	853720	860832	1.53659e+06	1.63819e+06	907758	1.88543e+06	1.31194e+06	1.60762e+06	24.4091	36.1919	34.4147	14.3222	1.01117e+06	1.31577e+06	1.1064e+06	1.01575e+06	987201	1.96722e+06	2.25761e+06	1.08783e+06	2.20697e+06	1.74242e+06	2.12365e+06	1.14445e+06	1.32339e+06	1.8508e+06	1.93304e+06	155819	557755	661238	269571	0.592046	0.684616	0.957456	-0.756218	-0.546633	-0.0627213	0.023178	0.259346	0.882808
		335.149	17.529	907933	907933	812457	864004	37891.7	18190.5	831738	49523.8	26107.7	848679	273714	56945.3	5.54734	156.829	151.994	92.7109	1.1379e+06	812457	937899	45083.2	20860.8	1.06483e+06	68249.1	31286.6	993408	363525	75224.4	962752	376926	364315	219375	164139	595869	545124	203860	4.38862	1.71818	1.66069	2.13377	0.780883	0.731787	0.0197083	0.753008	0.752957
		333.229	14.632	1.1647e+06	620703	471256	722163	406714	368629	526218	985512	911618	1.1647e+06	173177	158607	20.8722	18.9523	12.7511	6.21046	777918	471256	783927	483904	422744	673692	1.35814e+06	1.09245e+06	1.36332e+06	230001	209519	677700	526780	1.27131e+06	219760	178811	130853	154912	14482.7	3.08382	2.39707	5.78498	1.62472	1.26127	2.53231	0.0415272	0.0517318	0.00281549
		331.956	16.418	2.88526e+06	1.17284e+06	1.24252e+06	1.34014e+06	861295	1.2418e+06	942697	1.76449e+06	2.04717e+06	827996	2.70862e+06	2.88526e+06	6.71313	19.7353	41.2619	4.46562	1.46991e+06	1.24252e+06	1.45476e+06	1.02476e+06	1.4241e+06	1.20689e+06	2.43165e+06	2.45326e+06	969199	3.59738e+06	3.81141e+06	1.38906e+06	1.21858e+06	1.95137e+06	3.70439e+06	127137	199926	850655	151340	0.374976	0.328956	0.526773	-1.41513	-1.60403	-0.924748	0.000334192	0.000681872	0.071146
		331.199	14.939	223596	80562.9	71141.6	203444	7763.35	26247	223596	89793.2	36810.8	184356	25033.5	1711.64	62.3532	139.32	72.1083	123.32	100968	71141.6	220844	9236.76	30100	286259	123745	44112.9	215795	33247.6	2261.07	130985	108532	127884	17754.3	79236.4	154269	85915.9	21910.8	7.37761	6.11299	7.20299	2.88315	2.61188	2.8486	0.156448	0.489476	0.189135
		329.888	1.152	410163	247907	198219	410163	227931	188412	291493	292872	222523	358137	262346	292516	38.8335	22.0415	23.2928	7.6896	310698	198219	445243	271190	216071	373185	403609	266664	419212	348427	386411	318054	286815	363162	367419	123676	79714.2	83933	26858.8	0.865642	0.780622	0.988412	-0.208158	-0.357305	-0.0168152	0.633253	0.278613	0.951253
		329.855	1.213	1.8092e+06	1.01734e+06	1.04953e+06	1.8092e+06	1.02274e+06	963234	1.41254e+06	1.02983e+06	1.03534e+06	1.5777e+06	1.12318e+06	1.19353e+06	34.6884	21.5432	25.919	4.29445	1.27501e+06	1.04953e+06	1.96394e+06	1.21685e+06	1.10464e+06	1.80841e+06	1.41922e+06	1.24072e+06	1.84675e+06	1.49172e+06	1.57665e+06	1.42949e+06	1.37663e+06	1.50223e+06	1.53418e+06	476377	378117	311427	60051.3	0.93176	0.897304	0.979172	-0.10197	-0.156331	-0.0303657	0.788144	0.617263	0.900146
		327.886	1.798	2.62482e+07	2.62482e+07	1.13119e+07	1.68296e+07	2.26455e+07	9.11827e+06	7.60045e+06	7.97244e+06	1.73526e+07	7.9387e+06	8.55584e+06	8.038e+06	41.6581	63.1255	48.9307	4.41329	3.28966e+07	1.13119e+07	1.8269e+07	2.69434e+07	1.04568e+07	9.73049e+06	1.09869e+07	2.07948e+07	9.29253e+06	1.13632e+07	1.06181e+07	2.08258e+07	1.57102e+07	1.36914e+07	1.09907e+07	1.10171e+07	9.73499e+06	6.20976e+06	526832	1.89486	1.42942	1.24573	0.922094	0.515426	0.316989	0.317264	0.562052	0.601148
		327.204	13.376	253154	217744	190841	6760.91	213512	187080	10894.8	210988	199510	253154	188833	187550	82.9445	80.3038	12.769	0.482189	272896	190841	7339.14	254035	214543	13948.1	290764	239086	296325	250794	247753	157025	160842	275392	249273	135970	128737	31564.6	2150.58	0.629933	0.645244	1.10478	-0.66673	-0.632083	0.143757	0.429837	0.42474	0.348387
		326.878	1.795	9.72218e+06	2.8204e+06	5.73123e+06	6.86355e+06	5.12531e+06	5.07988e+06	8.28409e+06	3.13199e+06	6.46592e+06	9.72218e+06	5.00521e+06	5.60399e+06	40.5915	29.8061	51.167	7.9817	3.53477e+06	5.73123e+06	7.45057e+06	6.09804e+06	5.8256e+06	1.06057e+07	4.31623e+06	7.74854e+06	1.13802e+07	6.64754e+06	7.40283e+06	5.57219e+06	7.50979e+06	7.81498e+06	7.02518e+06	1.96274e+06	2.68461e+06	3.53243e+06	534075	0.793174	1.06898	1.11242	-0.334291	0.0962366	0.153705	0.401337	0.825921	0.784964
		326.872	1.246	1.11502e+06	709851	772556	564960	745776	720195	849227	806117	859710	1.11502e+06	815670	969267	15.6017	8.85282	17.8072	12.1695	889647	772556	613279	887317	825919	1.08722e+06	1.11092e+06	1.03025e+06	1.30517e+06	1.08331e+06	1.2804e+06	758494	933487	1.14878e+06	1.18185e+06	138719	136634	141317	139361	0.641783	0.78985	0.972014	-0.639842	-0.340349	-0.0409507	0.0444518	0.142335	0.813395
		325.859	1.22	3.09358e+06	2.41444e+06	1.57606e+06	2.69649e+06	1.54814e+06	1.49418e+06	3.09358e+06	1.51307e+06	1.57597e+06	2.32299e+06	2.73938e+06	2.88844e+06	26.1453	44.4062	24.9748	3.74578	3.02598e+06	1.57606e+06	2.92711e+06	1.84196e+06	1.71352e+06	3.96056e+06	2.08518e+06	1.88859e+06	2.71914e+06	3.63823e+06	3.81561e+06	2.50972e+06	2.50535e+06	2.23097e+06	3.72692e+06	810079	1.26189e+06	434045	125428	0.673403	0.67223	0.598609	-0.570458	-0.572972	-0.740315	0.138796	0.285801	0.0201226
		324.875	1.226	2.59464e+06	1.50103e+06	1.56894e+06	2.59464e+06	1.57479e+06	1.165e+06	1.94943e+06	1.74897e+06	1.83826e+06	2.39693e+06	1.80219e+06	1.98127e+06	32.4505	25.1009	17.6051	6.69375	1.88122e+06	1.56894e+06	2.81655e+06	1.87368e+06	1.33602e+06	2.49576e+06	2.41028e+06	2.20291e+06	2.80569e+06	2.39353e+06	2.61724e+06	2.0889e+06	1.90182e+06	2.47296e+06	2.50538e+06	649214	580383	306242	158190	0.833766	0.759093	0.987058	-0.262286	-0.397651	-0.0187937	0.458647	0.264209	0.902298
		323.897	1.549	644934	603905	387587	644934	639903	634415	559933	531610	500134	591205	601219	556072	25.3477	7.30614	8.54984	5.51697	756866	387587	700093	761351	727547	716855	732617	599344	692026	798492	734568	614849	735251	674662	766530	198851	23226.6	68311.7	45201.6	0.802119	0.959194	0.880151	-0.318111	-0.0601057	-0.184177	0.386715	0.366098	0.200718
		320.88	1.225	6.06439e+06	2.19487e+06	2.50966e+06	3.90534e+06	2.44543e+06	2.32046e+06	4.69706e+06	2.62712e+06	4.51535e+06	6.06439e+06	2.75947e+06	2.894e+06	31.7209	42.4026	39.1029	3.36546	2.7508e+06	2.50966e+06	4.23935e+06	2.90955e+06	2.6611e+06	6.01342e+06	3.62046e+06	5.41104e+06	7.09858e+06	3.66491e+06	3.82296e+06	3.1666e+06	3.86136e+06	5.37669e+06	3.74394e+06	936814	1.86788e+06	1.73931e+06	111760	0.845795	1.03136	1.43611	-0.24162	0.044552	0.522163	0.470394	0.938154	0.297351
		319.927	1.577	6.04182e+06	3.56394e+06	163232	3.49354e+06	4.20053e+06	4.19859e+06	3.75702e+06	3.65426e+06	3.85821e+06	3.13501e+06	6.04182e+06	3.8891e+06	80.7426	6.30544	10.5061	30.6557	4.46663e+06	163232	3.79233e+06	4.99775e+06	4.81494e+06	4.80994e+06	5.03597e+06	4.62355e+06	3.66964e+06	8.02428e+06	5.13748e+06	2.8074e+06	4.87421e+06	4.44305e+06	6.58088e+06	2.3146e+06	107018	700817	2.04127e+06	0.426599	0.740662	0.675146	-1.22905	-0.433113	-0.566729	0.160472	0.211794	0.17181
		319.884	1.47	3.74521e+06	3.01413e+06	2.6179e+06	3.74521e+06	3.16892e+06	2.95333e+06	3.56372e+06	2.90218e+06	2.44938e+06	3.52203e+06	2.45039e+06	2.7902e+06	18.2959	9.58766	18.2054	9.17012	3.77757e+06	2.6179e+06	4.06553e+06	3.77035e+06	3.38687e+06	4.56247e+06	3.99952e+06	2.93525e+06	4.12266e+06	3.25441e+06	3.68584e+06	3.487e+06	3.90656e+06	3.68581e+06	3.47013e+06	766307	599518	652912	305062	1.00486	1.12577	1.06216	0.0069978	0.170912	0.0869946	0.979101	0.425864	0.702207
		319.154	12.752	1.21819e+06	1.14365e+06	921595	8596.03	776559	885487	1.21819e+06	695098	650866	46798.3	1.08553e+06	1.20166e+06	87.0206	23.9639	78.0183	7.18085	1.43332e+06	921595	9331.22	923943	1.01548e+06	1.5596e+06	957921	779976	54779.1	1.44172e+06	1.58739e+06	788082	1.16634e+06	597559	1.51455e+06	721322	343633	478407	103008	0.52034	0.770088	0.394545	-0.942474	-0.376905	-1.34174	0.271443	0.275599	0.0845084
		318.931	1.606	5.40498e+06	4.57665e+06	683229	4.50105e+06	5.08076e+06	5.40498e+06	4.90598e+06	4.34447e+06	4.94954e+06	1.3608e+06	2.03469e+06	1.8849e+06	68.4268	4.93519	54.0955	5.40453	5.73586e+06	683229	4.88601e+06	6.04504e+06	6.19843e+06	6.28089e+06	5.98714e+06	5.93137e+06	1.59287e+06	2.70232e+06	2.48994e+06	3.76837e+06	6.17479e+06	4.50379e+06	2.59613e+06	2.70539e+06	119688	2.52109e+06	150173	1.45153	2.37846	1.73481	0.537578	1.25003	0.794779	0.60208	8.12935e-05	0.385132
		317.995	16.786	894160	66106.9	535389	894160	331986	7631.02	622124	7696.55	8192.08	209308	12288.4	7186.53	83.292	95.8902	154.875	37.0482	82850.9	535389	970635	394994	8751.24	796476	10606.7	9817.13	245002	16320.5	9493.37	529625	400074	88475.3	12906.9	443920	393887	135557	4827.49	41.0342	30.9968	6.85487	5.35875	4.95405	2.77713	0.216305	0.2789	0.508924
		317.955	1.383	1.87627e+07	1.25526e+07	1.87627e+07	1.56482e+07	1.40289e+07	1.58083e+07	1.31183e+07	1.10919e+07	1.22917e+07	1.40876e+07	1.28378e+07	1.10159e+07	19.8348	9.55536	12.0706	10.8014	1.57321e+07	1.87627e+07	1.69866e+07	1.66915e+07	1.8129e+07	1.67948e+07	1.52859e+07	1.473e+07	1.649e+07	1.70502e+07	1.4552e+07	1.71605e+07	1.72051e+07	1.55019e+07	1.58011e+07	1.5228e+06	801787	899680	1.76651e+06	1.08603	1.08885	0.981067	0.119062	0.122809	-0.0275767	0.42276	0.293942	0.81117
		317.897	1.215	775319	254252	461121	771272	472245	452810	585575	503065	268012	775319	563743	591275	52.5122	14.2397	49.2528	3.37109	318651	461121	837236	561872	519282	749683	693278	321176	907538	748720	781071	539002	610279	640664	764895	267921	122591	296700	22875.9	0.704675	0.79786	0.837584	-0.504971	-0.325793	-0.255695	0.340976	0.192022	0.614016
		317.828	1.193	947543	485700	479190	947543	430629	450830	733388	463604	466076	791675	411904	494406	42.126	31.4459	32.8873	12.8737	608721	479190	1.02858e+06	512359	517012	938921	638897	558531	926684	547059	653107	705498	656097	708037	600083	287197	244944	193570	74987.8	1.17567	1.09334	1.1799	0.23348	0.128748	0.238663	0.661354	0.783858	0.522671
		317.232	16.446	1.04707e+06	1.00505e+06	663791	1.04707e+06	391829	201191	462821	451300	43865.9	350091	645594	111682	23.2198	38.4427	75.293	99.7082	1.25962e+06	663791	1.13663e+06	466195	230726	592528	621941	52567.5	409794	857428	147531	1.02001e+06	429816	361434	502479	314565	183624	287751	501973	2.02996	0.855391	0.719301	1.02145	-0.225345	-0.475332	0.239406	0.823005	0.706604
	C20 H28 O3	316.207	12.82	510777	510777	428782	5874.48	394930	390462	10897.9	450226	392376	25622.1	364070	392474	85.9781	83.0511	79.5656	5.30956	640150	428782	6376.9	469885	447781	13952.1	620460	470210	29991.5	483529	518456	358436	310539	373554	500993	322689	257090	306871	24696.4	0.715452	0.619848	0.745628	-0.483073	-0.690013	-0.423472	0.595598	0.394487	0.61683
		315.913	1.525	7.97052e+07	6.02638e+07	7.97052e+07	7.95692e+07	7.42921e+07	6.91404e+07	7.25894e+07	6.08634e+07	7.39428e+07	7.16252e+07	6.4301e+07	6.54626e+07	15.2849	3.64505	10.1427	1.2659	7.55278e+07	7.97052e+07	8.63745e+07	8.8392e+07	7.92901e+07	9.29327e+07	8.38764e+07	8.86106e+07	8.38398e+07	8.53996e+07	8.64757e+07	8.05358e+07	8.68716e+07	8.54423e+07	8.59376e+07	5.47082e+06	6.94721e+06	2.74393e+06	760860	0.937143	1.01087	0.994236	-0.0936597	0.0155947	-0.00833988	0.279001	0.868747	0.82744
		315.901	1.241	654125	369961	370539	339060	372462	348943	533532	415827	422329	654125	414039	501132	5.00477	24.0188	27.2891	13.4584	463667	370539	368059	443152	400168	683056	573054	506106	765676	549895	661992	400755	508792	614945	605943	54497.6	152440	134760	79264.7	0.661373	0.839669	1.01486	-0.596463	-0.252107	0.0212755	0.0388777	0.480944	0.939262
		315.203	12.223	1.65759e+07	1.15676e+07	8.99643e+06	1.65759e+07	8.8142e+06	8.19903e+06	1.37624e+07	1.10795e+07	1.0132e+07	1.29163e+07	8.22786e+06	1.00886e+07	31.1349	29.7312	12.4443	14.3669	1.44975e+07	8.99643e+06	1.79936e+07	1.04871e+07	9.40264e+06	1.76194e+07	1.52687e+07	1.21418e+07	1.5119e+07	1.09276e+07	1.3327e+07	1.38292e+07	1.2503e+07	1.41765e+07	1.21273e+07	4.53567e+06	4.46394e+06	1.76369e+06	1.69663e+06	1.14034	1.03098	1.16897	0.189458	0.0440182	0.225244	0.659826	0.920046	0.287823
	C15 H22 O7	314.136	13.964	6.35288e+06	3.82642e+06	3.92561e+06	6.35288e+06	4.33764e+06	3.47732e+06	5.48033e+06	4.47686e+06	4.58889e+06	5.02261e+06	3.7838e+06	5.06284e+06	30.4336	22.6731	6.13789	20.4466	4.7956e+06	3.92561e+06	6.89622e+06	5.16089e+06	3.98779e+06	7.01621e+06	6.16959e+06	5.49918e+06	5.87914e+06	5.02535e+06	6.68798e+06	5.20581e+06	5.38829e+06	5.8493e+06	5.85666e+06	1.5272e+06	1.52697e+06	336199	1.17566e+06	0.888869	0.920028	0.998743	-0.169957	-0.12025	-0.0018143	0.650075	0.741732	0.991905
		313.91	1.223	598238	68918.7	66320.1	65398	69638.4	75668.8	100697	589957	598238	484702	53961.8	61880.3	2.72981	20.0838	11.3507	9.66691	86374.8	66320.1	70991.2	82855.2	86776.9	128917	813025	716909	567360	71667.9	81743.5	74562	99516.3	699098	76705.7	10493.4	25537.1	123797	7124.47	0.972054	1.29738	9.11403	-0.0408923	0.3756	3.18809	0.820791	0.324511	0.00667091
		312.917	16.378	2.01706e+06	1.5429e+06	886950	2.01706e+06	1.65897e+06	1.23173e+06	1.29508e+06	1.59408e+06	1.43513e+06	1.711e+06	1.36274e+06	1.60271e+06	38.2841	16.5251	8.76336	11.444	1.93369e+06	886950	2.18957e+06	1.97383e+06	1.41254e+06	1.65802e+06	2.19681e+06	1.71982e+06	2.00279e+06	1.80988e+06	2.11717e+06	1.67007e+06	1.68146e+06	1.97314e+06	1.96352e+06	690164	281376	239875	217281	0.850547	0.85635	1.0049	-0.233537	-0.223727	0.00704642	0.616488	0.322912	0.96673
	C18 H32 O4	312.227	16.087	1.30665e+06	1.30665e+06	370614	96404.9	23746	28866.2	46671.3	26166	34646.7	21463.1	32413.2	19226.9	107.331	36.3607	24.3621	36.1118	1.63761e+06	370614	104650	28252.7	33103.7	59751.1	36059.6	41519.4	25123.3	43048.6	25398.6	704292	40369.2	34234.1	34223.6	819145	16959.6	8349.08	12480.4	20.5791	1.17957	1.00031	4.36311	0.238261	0.000442117	0.352651	0.695385	0.999148
	C16 H24 O6	312.154	16.878	324762	171616	134326	230694	223254	214321	33713.6	287783	285807	324762	270579	248233	27.1654	68.0766	7.32757	6.0912	215084	134326	250425	265626	245783	43161.9	396597	342502	380146	359362	327915	199945	184857	373081	343638	59511.6	123112	27730.5	22236.9	0.581847	0.537941	1.08568	-0.781289	-0.894481	0.118599	0.0519858	0.18459	0.303396
	C21 H12 O3	312.081	15.631	654306	472064	407084	642254	327844	250698	653922	499940	430423	654306	289079	531631	23.9472	52.0995	21.6934	41.7956	591631	407084	697184	390066	287501	837186	688972	515806	765888	383932	702281	565299	504917	656888	543107	146832	292287	128091	225107	1.04086	0.929684	1.2095	0.0577802	-0.105188	0.274413	0.89935	0.887425	0.509197
		311.919	1.898	1.61923e+06	707250	607927	865220	1.61923e+06	676602	657445	729099	609375	919218	1.56808e+06	579812	17.853	55.8538	20.7622	65.0696	886387	607927	939219	1.92654e+06	775926	841695	1.00478e+06	730255	1.07598e+06	2.08261e+06	765928	811178	1.18139e+06	937003	1.42427e+06	177991	646160	182554	931032	0.569541	0.829471	0.657885	-0.812129	-0.269737	-0.604094	0.314215	0.747268	0.409213
		311.913	1.877	4.11399e+06	4.11399e+06	3.73933e+06	2.66639e+06	2.03786e+06	3.74007e+06	2.64348e+06	3.51336e+06	2.48976e+06	3.19625e+06	3.29997e+06	3.78295e+06	21.4268	30.7368	17.0881	9.64352	5.15601e+06	3.73933e+06	2.89444e+06	2.42463e+06	4.28911e+06	3.38432e+06	4.84179e+06	2.98365e+06	3.74133e+06	4.38276e+06	4.99725e+06	3.92993e+06	3.36602e+06	3.85559e+06	4.69001e+06	1.14277e+06	932376	934325	434513	0.837936	0.717701	0.822086	-0.255087	-0.478546	-0.28264	0.452201	0.168086	0.3377
		311.88	1.341	4.43326e+06	2.2469e+06	2.57804e+06	4.43326e+06	2.81904e+06	2.74087e+06	3.40955e+06	1.55025e+06	2.2744e+06	2.7303e+06	2.48712e+06	3.28221e+06	38.1844	12.2278	27.2353	19.4896	2.816e+06	2.57804e+06	4.81242e+06	3.35407e+06	3.14323e+06	4.36508e+06	2.13641e+06	2.72557e+06	3.19592e+06	3.3032e+06	4.33578e+06	3.40216e+06	3.62079e+06	2.68597e+06	3.81949e+06	1.22711e+06	653135	530860	730139	0.890736	0.947978	0.703226	-0.16693	-0.0770743	-0.507939	0.702375	0.769824	0.132296
	C14 H30 O7	310.198	13.642	150478	134834	91207.1	150478	89418	79743	92875.8	96087.6	102909	121025	108754	114846	24.4742	7.79346	12.0818	3.85308	168986	91207.1	163348	106389	91449.3	118905	132419	123323	141664	144439	151711	141180	105581	132469	148075	43369.8	13745.4	9170.97	5142.31	0.953439	0.713023	0.894606	-0.0687876	-0.487979	-0.160676	0.845311	0.0278304	0.123907
		309.924	1.769	4.45747e+06	3.7711e+06	2.8797e+06	3.17891e+06	2.59178e+06	2.20928e+06	3.21856e+06	4.45747e+06	2.24664e+06	2.7223e+06	1.98712e+06	3.04709e+06	13.8455	19.0611	37.0344	29.7767	4.72627e+06	2.8797e+06	3.45079e+06	3.08368e+06	2.5336e+06	4.12056e+06	6.14287e+06	2.6923e+06	3.18655e+06	2.63914e+06	4.02519e+06	3.68559e+06	3.24595e+06	4.00724e+06	3.33217e+06	945414	805831	1.86595e+06	980082	1.10606	0.974125	1.20259	0.145435	-0.0378206	0.266149	0.712954	0.920205	0.680006
		309.871	0.113	376980	376980	333146	18219.7	316880	308860	36466.8	329185	252123	14052.9	285379	311440	80.6105	72.3181	82.7791	6.17536	472463	333146	19778	377021	354200	46686.7	453652	302136	16449.5	379018	411410	275129	259302	257413	395214	231852	184484	222006	22904.6	0.696152	0.656106	0.651325	-0.522525	-0.607998	-0.618551	0.538033	0.397412	0.467143
		307.923	1.78	1.7407e+07	1.53338e+07	1.1434e+07	1.4644e+07	1.22713e+07	1.01653e+07	9.49059e+06	1.72988e+07	1.4462e+07	3.52591e+06	1.7407e+07	1.24265e+07	15.0771	13.629	61.8294	23.609	1.92177e+07	1.1434e+07	1.58964e+07	1.46003e+07	1.16576e+07	1.21504e+07	2.38396e+07	1.73307e+07	4.1272e+06	2.31186e+07	1.64154e+07	1.5516e+07	1.28027e+07	1.50992e+07	1.9767e+07	3.90578e+06	1.57611e+06	1.00439e+07	4.73989e+06	0.784946	0.647683	0.763858	-0.349335	-0.626641	-0.388623	0.348656	0.0859686	0.595824
		306.954	16.383	842934	842934	131854	748636	790324	531950	156220	710923	463067	206297	806724	694527	67.2282	64.699	54.8422	10.5693	1.05644e+06	131854	812664	940320	610040	200001	979729	554924	241477	1.07143e+06	917466	666985	583454	592043	994447	479197	370875	370523	108869	0.67071	0.586712	0.595349	-0.57624	-0.769276	-0.748192	0.432082	0.241481	0.248956
		306.864	1.22	4.83651e+06	2.93655e+06	3.07801e+06	4.17488e+06	2.97936e+06	3.01511e+06	3.79794e+06	3.39495e+06	3.02562e+06	4.83651e+06	3.34466e+06	3.62488e+06	19.9564	14.1733	25.5009	5.68606	3.68033e+06	3.07801e+06	4.53194e+06	3.54482e+06	3.45772e+06	4.86233e+06	4.67861e+06	3.62581e+06	5.6613e+06	4.44211e+06	4.78844e+06	3.76343e+06	3.95496e+06	4.65524e+06	4.61528e+06	730519	787013	1.01795e+06	244890	0.815429	0.856927	1.00866	-0.29437	-0.222755	0.0124384	0.225302	0.351919	0.961852
		304.866	1.245	4.2224e+06	2.75171e+06	2.80932e+06	1.76932e+06	2.62975e+06	2.31702e+06	4.20441e+06	2.988e+06	3.25207e+06	4.2224e+06	3.13453e+06	3.19382e+06	23.9221	33.1619	18.638	1.32493	3.44868e+06	2.80932e+06	1.92064e+06	3.12885e+06	2.65715e+06	5.38271e+06	4.11779e+06	3.89717e+06	4.94246e+06	4.16304e+06	4.21901e+06	2.72621e+06	3.7229e+06	4.31914e+06	4.19103e+06	767402	1.45665e+06	550968	39579.8	0.650488	0.888304	1.03057	-0.620406	-0.170875	0.0434414	0.0832709	0.695506	0.775765
		303.292	17.223	1.49942e+06	1.49942e+06	1.11894e+06	28879.2	40725.8	17736.1	19561.5	17764	21960.6	21666.7	23801.3	23289.4	86.4981	49.1344	11.4479	1.53727	1.87921e+06	1.11894e+06	31349.2	48455.1	20339.8	25043.6	24480.7	26316.8	25361.7	31611	30765.1	1.00983e+06	31279.5	25386.4	31188.1	928748	15059.3	918.296	598.116	32.3788	1.00293	0.813978	5.01698	0.00422321	-0.296938	0.252347	0.994015	0.00455411
		302.888	16.345	1.71907e+06	816671	132466	1.71907e+06	748191	572129	1.18056e+06	754568	716121	1.32457e+06	766842	1.05326e+06	89.4755	37.5566	36.5689	22.2549	1.02352e+06	132466	1.86609e+06	890191	656117	1.51141e+06	1.03988e+06	858176	1.55045e+06	1.01846e+06	1.39136e+06	1.00736e+06	1.01924e+06	1.1495e+06	1.20491e+06	866926	442008	358922	263677	0.836047	0.845906	0.954016	-0.258344	-0.241431	-0.0679148	0.784534	0.639455	0.865899
		302.869	1.226	8.99378e+06	6.23566e+06	5.41194e+06	8.99378e+06	5.69554e+06	3.58421e+06	8.64442e+06	6.81263e+06	6.25921e+06	7.36442e+06	4.20282e+06	6.93189e+06	27.265	42.5398	8.11212	34.6617	7.81507e+06	5.41194e+06	9.76299e+06	6.7765e+06	4.11037e+06	1.1067e+07	9.38855e+06	7.50083e+06	8.62031e+06	5.58186e+06	9.15698e+06	7.66333e+06	7.31797e+06	8.50323e+06	7.36942e+06	2.17949e+06	3.5098e+06	949287	2.52799e+06	1.03988	0.993018	1.15385	0.0564202	-0.0101087	0.206459	0.89761	0.987117	0.506897
	C21 H18 O2	302.128	18.025	2.40212e+06	890068	1.06648e+06	2.27014e+06	843698	841731	2.40212e+06	372333	328789	483652	412557	355267	53.3081	66.0779	20.2229	10.5518	1.11551e+06	1.06648e+06	2.46429e+06	1.00382e+06	965296	3.07532e+06	513115	394010	566132	547926	469306	1.54876e+06	1.68148e+06	491086	508616	793254	1.20725e+06	88150.1	55592.7	3.04505	3.30599	0.965533	1.60647	1.72508	-0.0506021	0.177161	0.283647	0.823193
		301.916	1.594	5.41559e+06	3.13552e+06	1.61378e+06	2.95693e+06	4.09739e+06	3.63209e+06	3.22899e+06	3.10215e+06	3.36688e+06	2.73393e+06	5.41559e+06	3.22293e+06	32.3828	11.8969	10.3623	35.896	3.92971e+06	1.61378e+06	3.20983e+06	4.87504e+06	4.16528e+06	4.13393e+06	4.2751e+06	4.03476e+06	3.20017e+06	7.19256e+06	4.25747e+06	2.91777e+06	4.39141e+06	3.83667e+06	5.72502e+06	1.18527e+06	419126	564178	2.07542e+06	0.509653	0.767057	0.670159	-0.972414	-0.382594	-0.577424	0.139793	0.325693	0.205488
		301.188	7.698	3.85063e+06	3.41684e+06	2.8688e+06	3.85063e+06	2.90003e+06	2.75304e+06	3.37322e+06	2.15271e+06	2.09142e+06	2.26605e+06	1.93748e+06	2.21485e+06	14.5623	10.7709	4.08282	9.4467	4.28228e+06	2.8688e+06	4.17996e+06	3.45043e+06	3.15719e+06	4.31857e+06	2.96667e+06	2.50629e+06	2.65249e+06	2.57321e+06	2.9258e+06	3.77701e+06	3.64206e+06	2.70849e+06	2.74951e+06	788201	603942	235243	249319	1.3737	1.32462	0.98508	0.458071	0.405582	-0.0216879	0.186399	0.153125	0.863429
		300.92	1.6	4.43497e+06	3.75628e+06	4.40685e+06	3.6734e+06	4.14545e+06	4.43497e+06	4.01729e+06	3.59224e+06	4.05039e+06	3.26294e+06	910082	3.76916e+06	10.1806	5.09546	10.8793	86.4103	4.70769e+06	4.40685e+06	3.98758e+06	4.93221e+06	5.08602e+06	5.14315e+06	4.95049e+06	4.85386e+06	3.81938e+06	1.2087e+06	4.97903e+06	4.36737e+06	5.05379e+06	4.54124e+06	3.09387e+06	361679	109095	627015	2.66603e+06	1.41162	1.63349	1.46782	0.497355	0.707955	0.553676	0.438984	0.258029	0.400442
		299.912	1.218	689610	12477.8	26599.8	33065.3	44057	22309.8	64277.1	455275	479033	689610	33548.5	45580.7	43.7814	48.1958	23.8282	21.5042	15638.2	26599.8	35893.3	52418.6	25584.8	82290.9	627418	574057	807213	44556.5	60211.8	26043.8	53431.4	669563	52384.2	10139	28366.6	122158	11070	0.497169	1.01999	12.7818	-1.00819	0.0285578	3.67602	0.0702143	0.964919	0.00660095
		299.909	16.35	2.17184e+06	1.17154e+06	660590	2.17184e+06	372187	910903	1.59424e+06	911435	836831	700921	1.12779e+06	1.19035e+06	57.5964	63.8563	13.0739	3.81677	1.46828e+06	660590	2.35759e+06	442825	1.04462e+06	2.04103e+06	1.25606e+06	1.00283e+06	820452	1.49784e+06	1.57245e+06	1.49549e+06	1.17616e+06	1.02645e+06	1.53515e+06	848827	807183	218760	52754.8	0.974166	0.766155	0.668631	-0.0377612	-0.384291	-0.580717	0.954004	0.593123	0.0543304
		299.209	13.78	196596	185250	133487	192532	167503	124527	195143	184254	168241	177958	163700	196596	18.8908	21.9128	4.5624	12.9123	232172	133487	208998	199294	142808	249833	253922	201615	208306	217413	259702	191552	197311	221281	238558	51603.9	53540.1	28465.2	29902.8	0.802961	0.827102	0.927579	-0.316599	-0.273863	-0.108458	0.340358	0.407308	0.559952
		299.209	13.213	1.63845e+06	1.5241e+06	1.21948e+06	376754	1.19803e+06	1.07251e+06	1.35889e+06	1.3947e+06	1.36588e+06	1.63845e+06	1.28519e+06	1.50487e+06	57.1413	11.8658	10.2121	11.1352	1.91014e+06	1.21948e+06	408976	1.4254e+06	1.22995e+06	1.73972e+06	1.92205e+06	1.63682e+06	1.91786e+06	1.70689e+06	1.98792e+06	1.17953e+06	1.46502e+06	1.82558e+06	1.84741e+06	751378	257184	163481	198725	0.63848	0.793017	0.988184	-0.647287	-0.334575	-0.0171479	0.325727	0.178336	0.900543
		299.172	16.878	270700	196042	133567	249178	234620	270700	12153.5	260015	257427	36079.8	250362	235049	29.9944	81.1772	69.6712	4.46141	245697	133567	270489	279149	310438	15559.5	358329	308492	42232.7	332512	310499	216584	201716	236351	321505	72955.6	161973	169948	15565.9	0.673657	0.62741	0.735139	-0.569914	-0.67252	-0.443911	0.152443	0.39518	0.550353
		298.183	13.215	257690	204280	156722	227234	213750	177993	257690	179130	164194	192143	148712	162448	18.3419	18.44	7.8355	6.24288	256022	156722	246669	254317	204122	329908	246861	196765	224910	197508	214593	219804	262782	222845	206051	54830.7	63318.7	25111.9	12080.8	1.06675	1.27533	1.08151	0.0932185	0.350868	0.113042	0.761379	0.319204	0.458037
	C15 H22 O6	298.141	14.188	9.25213e+06	6.46456e+06	6.30366e+06	9.25213e+06	6.25945e+06	6.83745e+06	8.11013e+06	5.36179e+06	6.36209e+06	6.75303e+06	5.50817e+06	6.273e+06	22.5855	13.394	11.6499	9.18105	8.10195e+06	6.30366e+06	1.00434e+07	7.44744e+06	7.84118e+06	1.0383e+07	7.38913e+06	7.62412e+06	7.90466e+06	7.31552e+06	8.28659e+06	8.14968e+06	8.55721e+06	7.6393e+06	7.80106e+06	1.87034e+06	1.5934e+06	258097	686652	1.04469	1.09693	0.979265	0.0630739	0.133472	-0.0302284	0.824342	0.585524	0.719476
		297.908	16.36	2.22866e+06	1.3077e+06	943977	2.22866e+06	1.67303e+06	1.75754e+06	287615	1.0939e+06	841312	1.71575e+06	1.14199e+06	1.94555e+06	44.3389	66.5928	36.9787	36.806	1.63892e+06	943977	2.41927e+06	1.99055e+06	2.01554e+06	368219	1.50752e+06	1.0082e+06	2.00835e+06	1.51671e+06	2.57006e+06	1.66739e+06	1.4581e+06	1.50802e+06	2.04338e+06	738057	943950	500074	744834	0.815994	0.713573	0.738002	-0.29337	-0.486867	-0.438303	0.616773	0.520119	0.395584
		296.955	1.985	3.39428e+06	1.85645e+06	3.39428e+06	1.37109e+06	1.80999e+06	1.63196e+06	324352	1.57515e+06	1.53761e+06	1.34318e+06	1.70778e+06	1.35428e+06	47.8524	64.6182	8.38315	16.3263	2.32666e+06	3.39428e+06	1.48836e+06	2.15351e+06	1.87153e+06	415252	2.17073e+06	1.84262e+06	1.57224e+06	2.26815e+06	1.789e+06	2.4031e+06	1.4801e+06	1.86187e+06	2.02857e+06	955258	932897	299711	338806	1.18463	0.729624	0.91782	0.244432	-0.454775	-0.123717	0.645069	0.500459	0.600871
	C15 H20 O6	296.125	16.169	1.69284e+07	4.20247e+06	6.83733e+06	1.69284e+07	1.85985e+06	255816	9.97548e+06	666729	287312	1.14442e+07	1.12477e+07	1.14697e+06	72.0512	129.285	153.282	115.248	5.2669e+06	6.83733e+06	1.83762e+07	2.21283e+06	293369	1.27711e+07	918824	344305	1.33959e+07	1.49383e+07	1.51514e+06	1.01601e+07	5.09244e+06	4.88634e+06	8.22671e+06	7.15849e+06	6.71884e+06	7.37508e+06	9.4916e+06	1.23502	0.619013	0.59396	0.304532	-0.691958	-0.751562	0.808633	0.687899	0.68361
	C15 H20 O6	296.125	17.383	1.87168e+06	509989	542043	208098	1.29284e+06	1.37669e+06	1.32149e+06	1.86588e+06	1.87168e+06	1.3811e+06	1.24776e+06	1.61348e+06	43.8642	3.20356	16.503	18.0764	639163	542043	225895	1.53821e+06	1.57879e+06	1.69185e+06	2.57139e+06	2.24296e+06	1.61663e+06	1.65717e+06	2.13139e+06	469034	1.60295e+06	2.14366e+06	1.89428e+06	216091	79615.5	485065	335324	0.247605	0.846203	1.13165	-2.01389	-0.240924	0.178424	0.00944651	0.216057	0.579351
	C15 H20 O6	296.125	13.962	1.53073e+06	1.09417e+06	1.13212e+06	1.36798e+06	1.53073e+06	551134	1.49798e+06	1.16557e+06	988663	1.21523e+06	1.45421e+06	1.16413e+06	12.3819	46.6241	10.6033	15.6679	1.37131e+06	1.13212e+06	1.48497e+06	1.82124e+06	632040	1.91779e+06	1.60628e+06	1.18478e+06	1.42247e+06	1.93138e+06	1.53781e+06	1.32947e+06	1.45702e+06	1.40451e+06	1.73459e+06	180111	716087	211323	278292	0.766442	0.839981	0.809707	-0.383751	-0.251572	-0.304528	0.134368	0.650537	0.222661
		294.882	1.147	646191	257757	260495	646191	306427	215825	448686	224944	206775	594519	218634	399876	57.5751	36.2686	63.9641	41.4406	323043	260495	701458	364584	247507	574431	309997	247793	695906	290373	528233	428332	395507	417898	409303	238592	165641	242762	168193	1.04649	0.966295	1.021	0.0655604	-0.049464	0.0299833	0.929746	0.933399	0.968654
	C17 H26 O4	294.184	15.73	3.08001e+06	2.68154e+06	3.08001e+06	190174	331181	495649	616729	311007	352956	605420	2.94387e+06	141866	78.9424	29.7853	37.6381	128.418	3.36074e+06	3.08001e+06	206439	394036	568409	789569	428601	422971	708666	3.90982e+06	187405	2.21573e+06	584005	520079	2.04861e+06	1.74575e+06	198227	163345	2.63215e+06	1.08158	0.285073	0.253869	0.113134	-1.8106	-1.97784	0.935522	0.370912	0.352574
		293.931	1.544	2.17638e+07	1.67841e+07	2.17638e+07	2.07545e+07	1.66455e+07	1.73374e+07	1.89726e+07	1.24824e+07	1.75946e+07	1.91888e+07	1.59538e+07	1.68293e+07	13.3174	6.76985	21.3349	3.77696	2.10353e+07	2.17638e+07	2.25296e+07	1.98046e+07	1.98825e+07	2.42897e+07	1.72021e+07	2.10848e+07	2.24611e+07	2.11886e+07	2.22314e+07	2.17762e+07	2.13256e+07	2.02493e+07	2.171e+07	747253	2.56728e+06	2.72724e+06	737413	1.00305	0.982295	0.932719	0.00439266	-0.0257717	-0.100485	0.928495	0.856525	0.531196
		292.885	1.223	1.18443e+06	600492	689592	1.18443e+06	643382	632291	855353	685930	769125	780004	788827	708678	38.139	17.6965	6.9074	7.56911	752589	689592	1.28573e+06	765490	725110	1.09507e+06	945286	921695	913022	1.04766e+06	936159	909302	861889	926668	991909	327511	202945	16696.9	78842.1	0.916719	0.868919	0.934226	-0.125448	-0.202706	-0.098156	0.760639	0.467981	0.229613
		292.859	16.331	2.12781e+06	727729	648302	2.12781e+06	570364	666645	1.57344e+06	723518	871658	1.71245e+06	643231	1.02282e+06	71.2543	59.0756	48.3757	32.2208	912053	648302	2.30979e+06	678614	764508	2.0144e+06	997086	1.04457e+06	2.00448e+06	854289	1.35113e+06	1.29005e+06	1.15251e+06	1.34871e+06	1.10271e+06	892915	747657	568407	351321	1.16989	1.04516	1.22309	0.226371	0.0637224	0.290526	0.803839	0.937762	0.631574
	C15 H16 O6	292.098	17.383	944868	725129	490642	899878	642983	602150	753418	836266	782146	944868	494670	442938	29.1178	11.7471	9.69853	7.80279	908794	490642	976841	765015	690545	964565	1.15247e+06	937299	1.106e+06	656982	585118	792092	806708	1.06525e+06	621050	263271	141688	113222	50815.1	1.27541	1.29894	1.71525	0.350958	0.377337	0.778417	0.451313	0.186919	0.0152493
		291.976	16.396	536954	36917.1	84649.1	9522.18	196915	13447	4707.19	101916	14709.7	5139.41	536954	219034	87.0088	151.397	131.384	59.4727	46267.7	84649.1	10336.6	234288	15421	6026.4	140451	17627.6	6015.86	713140	289342	47084.4	85245.1	54698.3	501241	37163	129160	74491	299670	0.0939357	0.170068	0.109126	-3.41218	-2.55582	-3.19594	0.0660658	0.110038	0.075866
		291.951	1.808	4.28143e+06	3.51898e+06	2.49811e+06	4.28143e+06	2.44919e+06	2.19836e+06	3.13358e+06	3.11947e+06	3.27099e+06	1.89648e+06	3.86852e+06	2.41233e+06	26.0652	18.6631	27.2834	32.7881	4.41029e+06	2.49811e+06	4.64761e+06	2.91402e+06	2.52108e+06	4.01177e+06	4.29897e+06	3.91985e+06	2.21989e+06	5.13787e+06	3.18667e+06	3.852e+06	3.14896e+06	3.47957e+06	4.16227e+06	1.1785e+06	772616	1.10726e+06	1.37971e+06	0.925457	0.756549	0.835979	-0.111762	-0.402495	-0.258461	0.803209	0.354524	0.578783
		291.193	13.348	296751	269418	232735	267241	208774	227217	296751	194233	226084	281862	137065	140505	8.02426	18.9951	18.9506	1.75264	337658	232735	290097	248398	260572	379916	267674	270931	329929	182039	185606	286830	296295	289511	183822	52537.9	72673.2	35040.7	2522.29	1.56036	1.61186	1.57495	0.641883	0.688723	0.655306	0.078396	0.129525	0.0272629
		290.899	1.652	1.33224e+06	563684	796475	1.17066e+06	627183	792641	1.07274e+06	460316	723304	1.33224e+06	856081	684258	36.2992	27.1074	53.3324	15.7754	706457	796475	1.27079e+06	746216	909000	1.37338e+06	634365	866784	1.55944e+06	1.13698e+06	903901	924573	1.00953e+06	1.0202e+06	1.02044e+06	303189	325443	481240	164812	0.906053	0.989309	0.999761	-0.142333	-0.0155062	-0.000345291	0.718603	0.968888	0.999514
		289.999	1.845	7.52962e+06	6.39114e+06	6.48573e+06	711639	5.8996e+06	7.52962e+06	6.04568e+06	777114	7.00116e+06	5.10593e+06	6.99746e+06	687539	73.0037	13.893	74.2847	116.117	8.00993e+06	6.48573e+06	772503	7.01929e+06	8.63497e+06	7.74e+06	1.07095e+06	8.38997e+06	5.97667e+06	9.29348e+06	908234	5.08939e+06	7.79809e+06	5.14586e+06	5.10086e+06	3.81542e+06	809402	3.72957e+06	5.92926e+06	0.997752	1.52878	1.00882	-0.00324711	0.61238	0.0126729	0.998005	0.458991	0.99209
		289.956	1.935	6.35124e+06	3.32301e+06	4.06088e+06	1.36167e+06	3.93217e+06	2.81665e+06	1.27822e+06	3.66324e+06	1.3199e+06	6.35124e+06	2.21356e+06	2.95046e+06	47.8547	49.8033	66.6371	20.1807	4.16468e+06	4.06088e+06	1.47813e+06	4.67846e+06	3.23013e+06	1.63645e+06	5.04835e+06	1.58173e+06	7.43435e+06	2.93988e+06	3.89754e+06	3.23457e+06	3.18168e+06	4.68814e+06	3.41871e+06	1.522e+06	1.52158e+06	2.94289e+06	677170	0.946135	0.930666	1.37132	-0.0798816	-0.103665	0.455562	0.886776	0.854726	0.607845
		289.261	16.874	275223	6496.75	2110.35	275223	2391.66	2174.35	15802	3847.16	2636.89	3865.2	2484.34	9205.44	165.343	114.974	20.4077	81.311	8142.29	2110.35	298762	2845.58	2493.54	20230.6	5301.8	3159.96	4524.36	3299.5	12160.3	103005	8523.23	4328.71	7729.92	169557	10140.4	1084.24	6265.55	13.3255	1.10263	0.559994	3.73611	0.140946	-0.836518	0.505833	0.929442	0.390816
		287.96	1.922	4.01088e+07	2.33528e+07	3.20095e+07	3.53313e+07	3.50087e+07	2.36423e+07	6.87637e+06	2.20649e+07	2.02403e+07	4.01088e+07	2.99044e+07	7.01205e+06	20.4559	64.7925	39.9774	87.6972	2.92678e+07	3.20095e+07	3.83531e+07	4.16531e+07	2.7113e+07	8.80349e+06	3.04079e+07	2.42553e+07	4.69487e+07	3.97168e+07	9.26287e+06	3.32101e+07	2.58565e+07	3.38706e+07	2.44898e+07	4.66013e+06	1.64608e+07	1.17363e+07	2.15342e+07	1.35608	1.05581	1.38305	0.439442	0.0783453	0.467853	0.515738	0.939979	0.559406
		287.172	14.267	197648	128823	109479	145974	126037	120220	138986	176744	156385	197648	144200	144970	14.2542	7.48039	11.6615	0.37656	161452	109479	158458	149958	137869	177937	243573	187407	231354	191516	191505	143130	155254	220778	191510	29180.9	20552.5	29538.9	7.65439	0.747372	0.810684	1.15282	-0.420101	-0.302789	0.205174	0.112582	0.0987943	0.275792
	C21 H18 O	286.134	17.381	1.95473e+06	1.22601e+06	881494	1.79035e+06	1.1256e+06	1.2134e+06	1.95473e+06	1.03905e+06	1.16338e+06	1.6586e+06	958405	1.04902e+06	35.3146	31.8235	25.4666	6.38377	1.53654e+06	881494	1.94347e+06	1.33923e+06	1.39152e+06	2.50255e+06	1.43192e+06	1.39415e+06	1.94145e+06	1.27288e+06	1.38575e+06	1.45383e+06	1.74443e+06	1.58918e+06	1.32931e+06	535797	657064	305664	79811.2	1.09367	1.31228	1.19549	0.12918	0.392078	0.257598	0.77679	0.460406	0.343693
		285.972	17.815	2.30551e+06	68539.9	347678	914281	14576.2	9558.49	2.30551e+06	15909	13383.8	140776	10787	9386.41	97.1671	170.514	128.475	9.81828	85900.1	347678	992476	17342.7	10961.7	2.95163e+06	21924.3	16038.7	164783	14326.4	12399.4	475352	993313	67581.9	13362.9	466578	1.69596e+06	84229.9	1362.61	35.5725	74.3336	5.05743	5.15269	6.21594	2.33841	0.276047	0.494707	0.451345
		285.915	1.207	601300	84305.5	77520.6	137770	85482.3	82302.7	115836	414745	411630	601300	69769	79447.1	33.0459	19.58	22.824	9.17253	105659	77520.6	149553	101706	94384.7	148299	571563	493284	703842	92661.8	104949	110911	114797	589563	98805.4	36302.5	29244.2	106427	8688.47	1.12252	1.16185	5.96691	0.16674	0.216419	2.57698	0.688984	0.524641	0.00854558
		283.867	1.207	1.07496e+06	692894	678620	1.07496e+06	683408	648492	871809	722460	682548	976119	750125	791650	27.5685	16.3536	20.0611	3.80895	868395	678620	1.16689e+06	813112	743690	1.11614e+06	995628	817944	1.14258e+06	996257	1.04576e+06	904636	890979	985384	1.02101e+06	246147	198057	162561	35006.8	0.88602	0.872644	0.965107	-0.174588	-0.196535	-0.0512399	0.572765	0.446429	0.790232
		281.87	1.22	1.6908e+06	1.12035e+06	1.1421e+06	1.09697e+06	802344	663589	888036	812101	1.19205e+06	1.6908e+06	861854	856449	2.01523	14.4348	35.78	0.444923	1.40412e+06	1.1421e+06	1.19079e+06	954621	761004	1.13691e+06	1.11916e+06	1.42852e+06	1.97914e+06	1.14465e+06	1.13136e+06	1.24567e+06	950845	1.50894e+06	1.13801e+06	139362	187982	435592	9393.92	1.09461	0.835536	1.32595	0.130413	-0.259226	0.407027	0.376661	0.274157	0.336218
		280.936	1.251	797722	47071.1	50204.4	62139.2	48277	30715.6	85595.8	599934	622721	797722	19858.7	38523.2	14.9628	51.0848	16.0687	45.2117	58993.5	50204.4	67453.7	57439.6	35224.6	109584	826775	746249	933762	26374.9	50888.9	58883.9	67416.2	835595	38631.9	8625.2	38170.5	94067.2	17334	1.52423	1.74509	21.6297	0.608081	0.803303	4.43494	0.167506	0.406465	0.00149747
[truncated: 241 more rows]
