# Supplementary material for: A Multi-OMIC Characterisation of Biodegradation and Microbial Community Succession Within the PET Plastisphere
Source: Research Square preprint supplement (doi:10.21203/rs.3.rs-104576/v1), 2020-11-13
Supplement: Supplementary file 2 [file 82807f40dc4e5c07f04bfc46.xlsx]

## Sheet: Thioclava Cellular
Table S10A: Protein categories of Thioclava sp. BHET1 proteins detected in the cellular proteome when grown with fructose (positive control), terephthalic acid (TPA), bis(2-hydroxy ethyl) terephthalate (BHET) and amorphous polyethylene terephthalate (PET) pieces.
Note that the PET biofilm samples weren't included in the final results due to low numbers of proteins detected (See Table S2)
Protein ID and Prokka annotation	Protein sequence	KEGG KOALA annotation			Log2 transformed abundance															Log2 transformed abundance mean					Log2 transformed abundance standard deviation					Relative abundance mean (%)					Log2 fold change against positive control (fructose)				Significant T-test (fructose and treatment)				P value for T-test between Fructose and treatment				Log2 fold change against TPA
		KEGG ortholog 1	KEGG annotation	KEGG ortholog 2	Fructose	Fructose	Fructose	TPA	TPA	TPA	BHET	BHET	BHET	PET planktonic	PET planktonic	PET planktonic	PET biofilm	PET biofilm	PET biofilm	Fructose	TPA	BHET	PET planktonic	PET biofilm	Fructose	TPA	BHET	PET planktonic	PET biofilm	Fructose	TPA	BHET	PET planktonic	PET biofilm	TPA	BHET	PET planktonic	PET biofilm	TPA	BHET	PET planktonic	PET biofilm	TPA	BHET	PET planktonic	PET biofilm	BHET	PET planktonic	PET biofilm
DMKJLJHC_00003 Ferredoxin--NAD(P)(+) reductase fdr	MSGIVIVGAGQAAASMAARLRKKGYDGAITVVGAEPVAPYQRPPLSKGYLLGEMPLERLMLRANDWWANNDISLRLDCSVTEIDPKAQVVQLSDGESLDYSELALCTGATPRRLPASLGGNLGNVFTVRSLADVDAMRAQFRPGQRLVVIGGGYIGLEAAAVARKLGLEVALVEAAPRILGRVACAQTANAIRALHQENGVEIIEGLGLLSLRGDTVVTAVELEDGRVIEADFAIVGIGVTPNEEIARKAGIHCENGIAVDAQGRCSEDHIWAAGDCAAFPGGAGPLRLESVGNAIDMGELVAENMLGAAQDYSPKPWFWSDQFDSKLQIAGLNIGYDSVVARAGEGASFWYFRDGALIAVDALNDARAYMIGKRLIEGGKTVTPEQIADPETDLKALLK	K00529	hcaD; 3-phenylpropionate/trans-cinnamate dioxygenase ferredoxin reductase component [EC:1.18.1.3]		23.0514	23.199	22.9529	23.2342	23.2503	23.5203	23.2373	23.0882	23.0829	23.203	23.4467	23.0597	21.1511	22.2898	22.3467	23.0678	23.3349	23.1361	23.2365	21.9292	0.10114	0.131207	0.0715592	0.159745	0.550676	0.00991013	0.0130835	0.0116026	0.0120841	0.0140874	0.267177	0.0683767	0.16872	-1.13855				+	0.0847126	0.478708	0.275522	0.0452014	-0.1988	-0.0984567	-1.40573
DMKJLJHC_00005 Putative pterin-4-alpha-carbinolamine dehydratase	MTSKLDPEERKALLLALEDTGWRATDEGDAMIKRLLFRDFSDAWGFMAEVALLAEKMDHHPDWRNVYKTLEITLTTHDCSGLSVLDIELARAIDGLAEGRGEVDRDIGRPLMRLADSAADSEDGAEDDA	K01724	PCBD; 4a-hydroxytetrahydrobiopterin dehydratase [EC:4.2.1.96]		21.884	21.0068	21.0305	20.0763	20.5896	21.1328	19.819	21.087	20.6143	21.1727	20.8253	20.0511	22.3068	22.2244	21.9154	21.3071	20.5996	20.5068	20.683	22.1489	0.408037	0.431397	0.523198	0.468793	0.168444	0.00292461	0.0019647	0.00187519	0.00205853	0.0164044	-0.707533	-0.80031	-0.624047	0.841787					0.167254	0.163238	0.228627	0.0542745	-0.0927767	0.0834867	1.54932
DMKJLJHC_00006 Small-conductance mechanosensitive channel	MTLDELTHVSSWLTQDRIDAAILVAVNVIAALVILLIALSVSAWAKGRVTALSNRYKRLDDTLFSFLGNIVKYLILAIGVIFILNRFGIQTTSLAALIGAAGLAIGLALQGALSNLAAGVMIIMFRPFRQGDFIDAGSESGTVTEIQLFYVMITTYDGIQVIMPNSDIWKSAITNYSANPTRMMDLTIGVAYNADLKKTQEVLEAVSSSDPRAMTDPAPVIRVKNLGDSSVDFTFRVWASTADYWSLRAEMIRKIKVEFDANGIGIPFPTRTLEVVEVPRIETAQARQETGTA	K03442	mscS; small conductance mechanosensitive channel		22.9019	22.7667	22.9994	22.6765	22.6923	22.9855	22.3666	22.5045	22.1817	22.5991	22.6868	22.8307	22.9537	21.59	20.8858	22.8893	22.7848	22.3509	22.7055	21.8098	0.0954278	0.142105	0.132239	0.0954768	0.858422	0.00875735	0.00893534	0.00673256	0.00836355	0.0129688	-0.10457	-0.53844	-0.183797	-1.0795		+			0.436347	0.00952235	0.126463	0.151875	-0.43387	-0.0792267	-0.974927
DMKJLJHC_00009 hypothetical protein	MATIEARLAELGITLPDAPMPAANYVPFVRTGNQLFVSGQISNGPDGLIKGRLGADMDVAEGALAARFCGLALIAQAKAAIGDLDKIARVVKLTGFVNSTADFIDQPKVINGCSDLMVEVFGDTGRHARSAVSAASLPLGVAVEIEAIFEIA				24.6697	25.1318	24.8546	24.7998	24.7721	24.9035	24.7646	25.0974	24.9378	24.9405	25.006	24.9542	22.6094	21.2803	20.9454	24.8854	24.8251	24.9333	24.9669	21.6117	0.189901	0.0565662	0.135899	0.0282112	0.718616	0.0349334	0.0367556	0.040323	0.0400992	0.0113047	-0.06024	0.0478967	0.08155	-3.27366				+	0.689386	0.786181	0.580407	0.00338381	0.108137	0.14179	-3.21342
DMKJLJHC_00010 Chromosome partition protein Smc	MRFSRLRLNGFKSFVDPTDLVIHDGLTGVVGPNGCGKSNLLEALRWVMGENRPSAMRGGGMEDVIFAGASSRGARNFAEVSLQIDNTERLAPSGFNDSDGLEIIRRITRDAGSAYKVNSKDVRARDVQMLFADASTGAHSPALVRQGQISELINAKPKARRRILEEAAGISGLYQRRHEAELKLNGAEQNLTRVDDVIEQLATQLAQLARQARQAARYRTIGDDLRRAEGMLLFRRWREADMARETAQSAHREQVTNAASAERTAREAERTRAAHEEALPPLREEEAIAAAILQRIVVERDALSDQEAQARARIATLQGRVEQLNRDMEREAGLNRDAGETISRLEWEQGQIAKASEGHDDKLARAADDAHEAATILQDREARLTELTEDVARLAARHQ…	K03529	smc; chromosome segregation protein		20.0563	20.3422	20.4175	18.5119	19.6605	20.3189	20.4322	21.0889	20.7554	20.4219	20.3251	20.9873	22.0261	21.7041	21.3236	20.272	19.4971	20.7588	20.5781	21.6846	0.155604	0.746706	0.268108	0.292041	0.287146	0.00142718	0.000915018	0.00223313	0.00191413	0.0118903	-0.774893	0.4868	0.3061	1.41257				+	0.224151	0.0905278	0.260919	0.00361763	1.26169	1.08099	2.18746
DMKJLJHC_00015 Disulfide-bond oxidoreductase YfcG	MKLYSMPSSGNSYKVRLLLALQGRAYERVDVEYDSEALAQAHLSGALPFGKAPALHLDDGRVLAESNAILCYLGQGSDFTPTDSFAQAQMLSWMFWEQNQHEGVIAVRAALLHYEHRKPEATPQRLEELLTRGNALLQVMEDTLKAQTWLAGEAITLADICLYGYTHTADTRGGYDLRPYPALCAWRDRIAALPGYVGLDG	K00799	GST; glutathione S-transferase [EC:2.5.1.18]		22.0621	21.9768	21.9271	21.4359	21.8909	21.717	22.109	22.2265	22.1753	21.5946	21.5073	21.7227	21.6638	23.2085	21.0294	21.9887	21.6813	22.1703	21.6082	21.9672	0.055767	0.187435	0.0480851	0.0884815	0.915138	0.00469083	0.00415835	0.00594021	0.00390891	0.0144637	-0.30743	0.18157	-0.380497	-0.0214533		+	+		0.0902836	0.0251873	0.00676821	0.975187	0.489	-0.0730667	0.285977
DMKJLJHC_00018 Methionine aminopeptidase	MDDSHGRVTKDGIRIYEPRDFDGMRAASQVTAQILDEVADLVVPGVTTAALDAFIEKRVGEMGATSATIGYRGYRHASCISINHVVCHGIPGDKRLKDGDIVNIDVTVILNGWYGDSSRMYVAGALSRKAERLIQVTHDSLMIGIEQVKPGNTFGDIGHAIQKFVEGHRMSVVRDFCGHGVGEVFHAPPNVLHYGRAGSGAVLEEGMIFTIEPMVNLGRPETKVLSDDWTAVTRDKSLSAQFEHSVGVTADGVDIFTTSPAGRFHPTWR	K01265	map; methionyl aminopeptidase [EC:3.4.11.18]		22.9208	22.8107	23.0612	22.2073	22.1908	22.278	22.7602	22.5061	22.8084	22.2667	22.5647	22.1474	22.182	22.7369	21.5006	22.9309	22.2254	22.6916	22.3263	22.1398	0.102504	0.0378068	0.132596	0.175463	0.505622	0.00901323	0.00606339	0.00852564	0.00643015	0.0163019	-0.705517	-0.239337	-0.60461	-0.791053	+		+		0.000797742	0.113553	0.0136113	0.0959768	0.46618	0.100907	-0.0855367
DMKJLJHC_00023 2,4-dienoyl-CoA reductase [NADPH]	MSHYPHLFEPLDLGHVTLPNRVLMGSMHTNLEERGDWNAVAEFYAERARGGVALMVTGGMSPNAEGGVFPGAAGLFTPEDIAHHRIVTDRVHEAGGRIAMQILHAGRYAYGPECVSASPIKSPISPFAPKELDEAGIEKQIADIATSAARAREAGYDGVEVMGSEGYFLNQFLVRHVNKREDRWGGSFENRMRLPVEVMKRVRAAVGPDFIVIFRISLIDLIPDGSTWDEVITLARAIEAAGATMLNTGIGWHEARVPTIATSVPRAAFTWLTKRLRPEVSIPVITSNRINMPDVAESVLAEGCADMVSMARPFLADPDFVVKAQEGRAAQIAPCIACNQACLDHTFQGKVSSCLVNPRAAHETEIVLRPTEAPKRIAVVGAGPAGLSAAITAAQRGHD…	K00219	fadH; 2,4-dienoyl-CoA reductase (NADPH2) [EC:1.3.1.34]		25.3919	25.4078	25.4553	26.4499	26.5041	26.507	27.0583	27.1315	27.071	26.5869	26.44	26.4974	23.8612	22.3653	21.4969	25.4183	26.487	27.0869	26.5081	22.5744	0.0269385	0.0262796	0.0319567	0.0604474	0.976483	0.0505439	0.116306	0.17942	0.116701	0.0220327	1.06872	1.66863	1.08979	-2.84387	+	+	+	+	2.29698e-06	5.8923e-07	2.01495e-05	0.0146467	0.599913	0.0210733	-3.91258
DMKJLJHC_00025 hypothetical protein	MTKAQRSSLLDRLTYRRSVRRWRQAARDANALEIGQLPRLRSEARGLRRQLDNFLHQIEGRLQLPRIGADSVPAPPESDWTWRPELWRGPVSPFGISGAQNRAQLGRELTLFHDCAHSEVTLRQMRNLRETDLAPFGLRMDVLGFEGSFLSFVLDLPDSAIQGLQLNHLIRLEMLLELERPLEIFCRLNIKHGPNSDQLVREMPVTDSGAAVEFDLAYMRLNEKRLEKAWIDVIFERPAMNQVLLRDLHFSRYPRAEM				21.7939	21.0248	21.6391	20.6673	23.5361	21.8361	20.2051	20.6236	21.528	20.1551	20.4789	21.0781	21.3374	23.9359	21.9202	21.4859	22.0132	20.7856	20.5707	22.3978	0.332143	1.17787	0.552082	0.382374	1.1133	0.0033106	0.00523401	0.00227494	0.00190428	0.0194941	0.527227	-0.70036	-0.915267	0.911893					0.575262	0.199041	0.06293	0.329223	-1.22759	-1.44249	0.384667
DMKJLJHC_00029 hypothetical protein	MKRSFAAAVAASLMLASPALADWAQTKADAKGQTVYFNAWGGDPRTNAFIEWVSQQMQAKYGVTVEQVKLSDTGEAVSRVQAEKAAGQDSGGAVDLIWINGPNFLAMKQAGLLHGPFLNELPNAKYLDLSPGSAATNDFTVPTEGYESPWRLAKFVFAYDTDRVKDLPHDMAGLSQWAAAHPGRFTHPNPSNFMGATFLKQALVEMAPDAEALSKPVTDESYAKETAPLWAWYDKLRPNLWRKGESFPENESAQATLLADGEVDFAMFFDPAAPAAMIKQQVLPPSVRVWVPDEGSIGNMSYVAIPYNAAHQAGAELVANFLLDPATQAHMQNIDVLGSYSVLDPSKLDASAKEAFAKLPTAPALPTLAELGPTLPEPHPSWMTRLTEDWAKRYTK	K05777	ABC.VB1X.S; putative thiamine transport system substrate-binding protein		22.6034	22.0889	22.3922	21.9245	22.2579	22.5273	21.8173	22.0205	21.7972	22.5017	22.757	22.8052	22.1233	21.746	21.5286	22.3615	22.2365	21.8783	22.6879	21.7993	0.211147	0.246585	0.100873	0.13316	0.245669	0.00607413	0.00611052	0.00485194	0.00826214	0.0128745	-0.12498	-0.483217	0.32642	-0.562213		+			0.615059	0.0432292	0.138109	0.070109	-0.358237	0.4514	-0.437233
DMKJLJHC_00031 Mercuric reductase	MRKPLIFALLIAVALITAWFVADPSPEGLRNLRDGLQSWHANHPIALPAVFFVTYVTVAALSLPFAVWMTLLGAALFGFWEGLVLISFASALGATLALLVTRYLMRDWARAKLGNRMRRIEQGVTRDGAFYLFSLRLIPVVPFFATNLAFGLTSMKAWKFYLVSQVGMLPGTAVYVAAGAQLGQLNSLSGILSPGLIGAFLALALFPWIARAGLRIYTRKRAYSGFKRPTSFDRNLTVIGAGSAGLVASYVAAQAKAKVTLVEQAEMGGDCLNSGCVPSKSLIASGRAAANARAASDLGVSAAPQVDWPRVMTRISEVIETIAPNDSVTRYESLGVEVKRGHATLIDPWTVEMDGQRWSSRAIVLATGAAPVIPDLPGLKEVDPLTSETLWTALSSLDR…				22.1886	22.5053	22.3182	22.4312	22.4202	22.0863	21.7948	19.4531	21.0572	22.6485	22.541	22.6985	23.0545	22.5557	20.7772	22.3374	22.3126	20.7684	22.6293	22.1291	0.130013	0.160074	0.977584	0.0657065	0.977412	0.00597324	0.00644117	0.00224795	0.00793299	0.0161813	-0.02479	-1.569	0.291933	-0.208233			+		0.873259	0.0876477	0.0471476	0.780071	-1.54421	0.316723	-0.183443
DMKJLJHC_00033 Phosphoserine phosphatase	MFTATLITDPSRATLDQATLDAVCGAWGGGAARWLSNNVAAEFVCPQIPSNRWETWEGLQGLGVDLVVQPTEGRRKQMLLADMDSTMIQQECIDELADVAGVGDQVKAITAKAMNGELDFEGALTERVGLLKGLPESVIAEVIETRISFMPGGRALLATMKANGAYCALVSGGFTAFTGFVAQTLGFDENRANSLLVADGHLTGEVGRPILGREAKVQALEEITARLSLSHDQVMAVGDGANDLGMLGLAGAGVALHAKPSVAAQCDIRINHGDLSALLYIQGYAESDFA	K01079	serB; phosphoserine phosphatase [EC:3.1.3.3]		22.0212	22.211	22.6396	20.6754	18.0247	19.6975	23.0578	20.5225	19.6442	21.7797	19.4794	21.8499	22.0471	20.977	21.2283	22.2906	19.4659	21.0749	21.0364	21.4175	0.258664	1.09446	1.4473	1.10129	0.456907	0.00578268	0.000895422	0.00278006	0.00262979	0.00988067	-2.8247	-1.21572	-1.25421	-0.873107	+				0.0237541	0.307173	0.191974	0.0783674	1.60898	1.57049	1.95159
DMKJLJHC_00034 Phosphoserine aminotransferase	MAIQAPAARPANPRFSSGPCTKIPGFSLDMLSDAPLGRSHRAAIGKSKLKEAIETTREILGVPAEYRIGIVPASDTGAVEMALWSLLGARPATMVAWESFGAGWVTDVVKQLKIEAETKTAEYGEIVDFGKVDFNTDVVFTWNGTTSGVRVPNGDAIPADREGLTICDATSAAFAMQLPWDKLDVTTFSWQKVLGGEGGHGVLILSPRAVERLESYAPAWPLPKIFRMTKGGKLIEGIFKGETINTPSMLCVEDYLVSLNWAKSVGGLKGLVARATANAKTIWDFCDAKPWIANLATDPATASTTSVCLKFTDERIKDGAVFAKAIAKRLETEGVALDVGAYRDAPAGLRIWCGSTVEQADVEALLPWIEYAFEAEIAAQA	K00831	serC; phosphoserine aminotransferase [EC:2.6.1.52]		26.2495	26.1127	26.1832	25.0268	25.312	25.3602	25.4338	25.5848	25.5125	25.5241	25.468	25.3258	22.8221	21.1452	21.833	26.1818	25.233	25.5104	25.4393	21.9334	0.0558773	0.147116	0.061676	0.0834277	0.688267	0.0858033	0.0487645	0.0601558	0.055633	0.0141289	-0.9488	-0.67143	-0.74251	-4.24836	+	+	+	+	0.00103817	0.000336635	0.000472491	0.000960797	0.27737	0.20629	-3.29956
DMKJLJHC_00035 D-3-phosphoglycerate dehydrogenase	MAPKVLVSDSLSETAVQIFRDRGIEVDFEPKLGKDKDKLAEVIGKYDGLAIRSATKVTAKLLENATNLKVIGRAGIGTDNVDKEASSKKGVIVMNTPFGNMITTAEHAIAMMFAVARQIPEASASTHAGKWEKSKFMGVELTAKTLGVIGAGNIGGIVCDRARGLKMKVVAYDPFLSEEKAERMGVEKVDLDTLLKRADFITLHVPLTDQTRNILSRENLEKTKKGVRIINCARGGLVDEQALADLLTSGHVAGAAFDVFAEEPATENVLFNLPNVVCTPHLGAATTEAQENVALQVAEQMSNYLLDGAVENALNMPSMTAEEAKTMGPWVKLAEHLGGFIGQMTEDAIKAINVTYDGVASEMNLKALDAAVISGIMKASQPDVNMVSAPVVAKERGIQ…	K00058	serA; D-3-phosphoglycerate dehydrogenase / 2-oxoglutarate reductase [EC:1.1.1.95 1.1.1.399]		27.8066	27.8074	27.7222	26.5327	26.3881	26.3398	26.185	26.2233	26.0583	26.3174	26.2462	26.3477	24.9543	21.2058	23.9514	27.7787	26.4202	26.1556	26.3038	23.3705	0.0399764	0.0819792	0.0705121	0.0425363	1.58448	0.259555	0.111041	0.0940792	0.10129	0.0382568	-1.35855	-1.62319	-1.47497	-4.40823	+	+	+	+	3.00194e-05	9.25016e-06	3.66062e-06	0.0170558	-0.264643	-0.11642	-3.04968
DMKJLJHC_00037 Beta-ketothiolase BktB	MTGIVILSGTRTPIGTFGGSLSGFGPIDLATLVAKSAIERAGIAPDQIGQTVFGHVINTEPRDMYLSRVAAVEAGVPVGTPAMNVNRLCGSGVQAVVSAAQMLMLGDADFALAGGAEVMSKSPYILPAARFGQKMGDAWMLDMMTGALSCPFGTGHMGVTAENVASEEGISREDQDAFALQSQERAARAITEGHFTAEITPVEIASRKATRVFDTDEHPKQTSLEKLAGLKPVFQKDGTVTAGNASGINDGAAALVLARAEAAEAAGLTPRATITGYAIAGVRPEVMGLGPIPAVQALLARTGLKANDFDWIESNEAFASQALAVSRTLDLDPAKVNPDGGAIALGHPVGATGAILIVKALHALERTGGKRALVTMCIGGGQGIALAIERS	K00626	E2.3.1.9; acetyl-CoA C-acetyltransferase [EC:2.3.1.9]		25.2277	25.0864	25.178	25.9911	26.1153	26.1833	27.533	27.7435	27.6212	26.2123	26.1602	26.0857	26.4387	21.5175	25.6655	25.164	26.0965	27.6325	26.1527	24.5406	0.0585131	0.0795623	0.0863208	0.0519322	2.16078	0.0423757	0.0887269	0.261885	0.0912211	0.0860847	0.932537	2.46853	0.988713	-0.623457	+	+	+		0.000181854	4.74924e-06	5.75979e-05	0.704237	1.53599	0.0561767	-1.55599
DMKJLJHC_00042 hypothetical protein	MITARKRIWGWWFFDWASQPYNSLLITFIFAPFVKDLLGDGTKAQTVWGYGVGFAGVVIALCSPFLGAIADRSGRRIPFLWVFSAMYVVGAWGLWYAIPGDFHLLAIMISFAVGMIGMEFATTFTNAMLPDLGPREKIGKISGSGWAFGYVGGLISLLIMLLLLQANPSTGKTLLGLTPLFGLNPATGEDTRIVGPLVALWYAVFMIPFFCWVREPRKPDALPVGTALRGAWPDLRATLRALPRRRSLSSFLLSSMFYRDALNGIYTFGGLYAAGVLNWSITMIGIFGILAIVTGAIFAWLGGKADDRFGPKAVISLNVIVLVLVVIGVVFISRTEVFGIAVSPDSALPDIAFYVLGGLIGACGGALQSASRTMMVRQADPEKITEHFGLYALSGKATA…	K06902	UMF1; MFS transporter, UMF1 family		21.1395	21.873	22.6926	22.7009	22.7791	19.7074	21.8722	20.9486	19.5011	19.8982	22.0931	19.3396	21.5653	22.0971	22.1796	21.9017	21.7291	20.774	20.4436	21.9474	0.63439	1.42995	0.975861	1.18842	0.272224	0.00441636	0.00429862	0.00225669	0.00174374	0.0142658	-0.172583	-1.12775	-1.45809	0.0456533					0.883575	0.242481	0.200597	0.929983	-0.955167	-1.28551	0.218237
DMKJLJHC_00047 Farnesyl diphosphate synthase	MFQTRLLDIQKAVQSALDIAVARQPEGPLRAPMHYALQGGKRLRAFLVLESAALYDLPQAQAMPAASAVEALHAFSLVHDDLPCMDDDDLRRGQPTIHVKWDDATAVLAGDALQTLAFELCCDPVLGPPERRIALVEALAKASGAAGMCHGQALDIAAESATTPLSLEQIIDLQAGKTGALISFSARSGAILAGADQSALRAYAEALGLAFQIVDDILDVTGDEAATGKRVGKDADAGKATFVSLLGLDGAQARAAELIETAQNALSGYGARAQNLRDAAQFVISRKT	K00795	ispA; farnesyl diphosphate synthase [EC:2.5.1.1 2.5.1.10]		22.746	22.5574	22.7364	22.6699	22.5597	22.5509	22.6953	23.0047	22.5903	22.3139	22.6077	22.484	21.748	22.1138	22.6578	22.6799	22.5935	22.7634	22.4686	22.1732	0.0867171	0.0541517	0.175925	0.120461	0.373791	0.00757417	0.00782597	0.00896109	0.0070966	0.016683	-0.0864167	0.0834867	-0.211377	-0.50676					0.297961	0.579652	0.114278	0.135192	0.169903	-0.12496	-0.420343
DMKJLJHC_00048 1-deoxy-D-xylulose-5-phosphate synthase	MSDSANSLTVTPLLDRVRLPADLKGLGDAELKQLSDELRTEVISAVSQTGGHLGAGLGVVELTVALHAVFDAPRDKIIWDVGHQCYPHKILTGRRDRIRTLRMKDGLSGFTKRSESPYDAFGAGHSSTSISAAVGFAMGRELGAETGDAIAVIGDGAMSGGMAFEAMNHAGHLGKRVFVVLNDNEMSIAPPVGALSSYLTRLYAESPVQDLKDVAKNAVRTFLPEPLQEGARRAKEMLKGMAMGGTLFEELGFTYVGPIDGHDIDQLMPVLRMLKARAKGPVLIHVLTKKGKGYAPAESRADGGHATSKFDVVTGEQKKSTSNAPSYTKVFAQSLTREAHKDEKIVAVTAAMPDGTGLKMFAEQFPRRCFDVGIAEQHAVTFSAGLAASGMKPFCAIYS…	K01662	dxs; 1-deoxy-D-xylulose-5-phosphate synthase [EC:2.2.1.7]		24.6769	24.5354	24.5268	23.8714	23.8779	23.8194	23.8004	23.739	24.0715	23.7519	23.9303	23.9547	22.2697	21.8249	22.3981	24.5797	23.8562	23.8703	23.879	22.1642	0.0688328	0.0261852	0.144474	0.0904339	0.245611	0.0282631	0.0187781	0.0193004	0.0188636	0.0165798	-0.723467	-0.70939	-0.70073	-2.41547	+	+	+	+	0.000155647	0.00330439	0.000952816	0.000179794	0.0140767	0.0227367	-1.692
DMKJLJHC_00051 S-formylglutathione hydrolase	MKTISENRCFDGVQGVYSHHSNATGCEMTFGLFLPAEAKDGPVPVLWYLSGLTCTHENAMTKSGAQAYAAEHGIALVFPDTSPRGEGVADHEDYDLGQGAGFYVNATQDPWAPHFQMWDYIAQELPDALGAAFAIDTERQSITGHSMGGHGALTLAMHMPERFRSVSAFAPIANPTQSDWGRKQLGAYLGADEQLWAAHDSSLLMRERGFDGSVLIDQGSSDQFLDLLRPEALSEAMAARRQPGTFRMQAGYDHSYWFVSTFMPDHIDFHAEALWA	K01070	frmB; S-formylglutathione hydrolase [EC:3.1.2.12]		24.0483	23.9221	23.8614	24.2196	24.3393	24.3163	24.2315	24.4025	24.4601	24.2661	24.494	24.4697	21.5819	22.0285	22.486	23.9439	24.2917	24.3647	24.4099	22.0322	0.0778871	0.0518385	0.0970483	0.102205	0.36911	0.0181901	0.0253952	0.0271893	0.027256	0.0151294	0.347807	0.420783	0.466003	-1.91178	+	+	+	+	0.00626619	0.00876187	0.0068451	0.00200651	0.0729767	0.118197	-2.25958
DMKJLJHC_00054 hypothetical protein	MFAGFTSRRRFADLSEQEVLALAISSEEDDARIYRQYAEHLRHDYPASAKIFDGMAAEEDTHRRRLIDQHETRFGTVIPLIRREHVAGFYARKPVWLTQNLSLETIRGEAEAMERDAGKFYTLAAQHSTDSGTRKLLGDLAAAELGHEEAAKHLTQTHLPEDAKEEEDRKAHRQFILTWVQPGLAGLMDGSVSTLAPIFATAFATHDPWTTFLVGLAASVGAGISMGFTEAAHDDGVISGRGSPLKRGLASGVMTALGGLGHALPYLIPNFWTATSIAFIVVFIELWAIAWIQNRFMETPFLRAAFQVVLGGALVFAAGVLIGGG	K22737	mbfA; erythrin-vacuolar iron transport family protein		22.1824	22.3235	22.2461	22.4043	22.5427	22.6142	22.2493	21.8961	22.1962	22.7844	22.3848	22.9125	22.2532	21.9612	21.3145	22.2506	22.5204	22.1139	22.6939	21.8429	0.0577032	0.0871336	0.155496	0.224759	0.392227	0.0056248	0.00743935	0.00571251	0.00829628	0.0132697	0.269777	-0.136777	0.443247	-0.407713	+				0.0217591	0.308306	0.054018	0.219519	-0.406553	0.17347	-0.67749
DMKJLJHC_00058 Nicotinate phosphoribosyltransferase	MVDIATRVHNHKWKIDPIVRSLIDTDFYKLLMCQSIFRNHPDTQVTFSLINRTKSVRLAELVDEGELREQLDYARSLRLARGESTWLRGNTFYGKRQMFRSDFMEWFEGFQLPPYHLEKRDGQYELTFEGKWHEVMLWEIPALAILMELRGRAVLDRMGKFELQVLYARAMTRVWEKIEALRELPDLKIADFGTRRRHSFLWQDWCVQAMLEGLGDSAKGGAFTGTSNCLIAMRRDIEAVGTNAHELPMVYAALSETDETLRRAPYKVLADWHEEHEGNLRIILPDTYGTKGFLELAPDWLAGWTGIRIDSGDPASGAEDAIAWWRARGEDPRDKLVIFSDGLTVDKIRELHAQFSGRVKVSFGWGTLLTNDFRKLVPDDGLAPFSLVCKAISANGRPT…	K00763	pncB; nicotinate phosphoribosyltransferase [EC:6.3.4.21]		24.0585	24.0825	24.0969	23.7912	23.815	23.7553	23.821	23.6897	23.8547	23.8388	23.878	23.7868	21.3784	22.0337	21.9271	24.0793	23.7872	23.7885	23.8345	21.7797	0.0158661	0.0245285	0.0712116	0.0373806	0.287077	0.0199796	0.0179006	0.0182361	0.0182916	0.012701	-0.29212	-0.29083	-0.244763	-2.29957	+	+	+	+	0.000145141	0.00487302	0.00103929	0.000348217	0.00129	0.0473567	-2.00745
DMKJLJHC_00060 hypothetical protein	MKWAKRIAKDLIGSRPASLQVGALCTRRIDGKLQILLITSRDSGRWVVPKGWPMRGRSLAGAARQEAWEEAGVKGRISSEPVGSFHYEKILDGGLGVPTDVVLYNLKVDHLEKVYPEDHQRKRQWCSPRHAADLVAEDSLKKILLEFKG				21.6516	21.4271	20.8828	20.6087	20.6218	20.7857	20.9484	20.316	20.2219	20.7578	18.9853	19.0562	20.8436	21.902	21.3773	21.3205	20.672	20.4955	19.5998	21.3743	0.322789	0.0805595	0.322589	0.819388	0.432095	0.0029519	0.00206594	0.00186052	0.00097154	0.00958928	-0.648447	-0.825037	-1.72072	0.0538					0.0510354	0.0628539	0.0506842	0.894636	-0.17659	-1.07227	0.702247
DMKJLJHC_00095 Acetyl-coenzyme A carboxylase carboxyl transferase subunit beta	MNWITNYVRPRINSLFSRRDTPENLWTKCPECGTMLFHRELSDNLNVCSNCDHHLAITPRQRFGALFDGGVFSEVKVPEAIADPLHFKDQKRYPDRMKAAQRATGEKEAMLVAEGEIGRTPVVAACQDASFILGSMGMYVGNAFLAGAERAVKLKRPFIVFSAAGGARMQEGILSLMQMPRTTIAVQMLKEAGLPYIVVLTHPTTGGVTASYAMLGDVQIAEPNALICFAGPRVIEQTIREKLPEGFQRAEYLLDHGMLDRVTHRMKMREELVTILRMLMGMPPAVAGDLPAPAPPEVEPVAPAPEPAPEVAEGDEAKT	K01963	accD; acetyl-CoA carboxylase carboxyl transferase subunit beta [EC:6.4.1.2 2.1.3.15]		25.493	25.7874	25.4119	24.5529	24.7003	24.814	25.34	25.2785	25.3331	24.7769	25.1264	25.0426	21.7634	22.1209	21.9125	25.5641	24.6891	25.3172	24.9819	21.9322	0.161341	0.106896	0.0274823	0.148988	0.146609	0.0559188	0.033447	0.0526165	0.0405183	0.0141172	-0.875053	-0.246917	-0.582177	-3.63186	+		+	+	0.00307142	0.099805	0.019964	1.92409e-05	0.628137	0.292877	-2.75681
DMKJLJHC_00096 Dihydrofolate synthase/folylpolyglutamate synthase	MSDASDQIIARLMGLHPKVIDLSLDRMERLLAALDHPERKIPPVIHIAGTNGKGSTQAMIRAGLEAAGQRVHAYTSPHLARFHERIRLAGTLIPEADLAAILDECEAANDGAPITFFEVTTAAAFLAFSRVEADYTLLEVGLGGRLDATNVIEAPALTIITPVSIDHQQFLGETLPEIAGEKAGILKRRVPVIVGPQQEPALEVIEARAQKLGAPIAAHGQHWQVWEERVRLIFQDETGLLDLPLPNLPGPHQVLNAGAALAALRQLGFDESACEAAVTRAQWPARMQRLRQGPLPEAAPEAEIWLDGGHNPAAGEMLAQTLARLPQRPTYLICGMLNTKDVTGYLRPLAAHAAGLFAVSIPGEANTLPAETTAAAAEAVGMSAAPSASVGMALATIVA…	K11754	folC; dihydrofolate synthase / folylpolyglutamate synthase [EC:6.3.2.12 6.3.2.17]		23.2053	23.284	23.1128	22.6808	23.1377	22.7831	22.9282	23.2723	23.2301	22.8073	23.0661	23.041	22.1698	22.0115	22.849	23.2007	22.8672	23.1435	22.9714	22.3434	0.0699803	0.195765	0.153242	0.116526	0.363286	0.010867	0.00946076	0.0116621	0.0100562	0.0187728	-0.333527	-0.0572267	-0.229283	-0.85729				+	0.0858411	0.656033	0.0755319	0.0305856	0.2763	0.104243	-0.523763
DMKJLJHC_00097 Alkanal monooxygenase alpha chain	MIEFGIDTFGDITRDANGLRSPAQVIRDTLAEGELAEQVGLDYIGLGEHHRPDFAISTPEPIMAAILARTEKIRVGTSVTVLSSDDPIRVFQRFSTLDALAPGRPEVTIGRGSFTESFPLFGLALDDYEALFEEKSQLFHQLVTQEKVSFESRFRPPLKSLTVHPRPEQPLRVWRGVGGSPQSVIETAAMEMNLMLAIIGGDAARFAPLVDLYKRAHEQLGTKPGVIGVHSPGHIAETDQQARDEFFPGYQKMHAMIGASRGWPPLRREQFEAEITHGSLYVGSPETVAAKIASTIKALDLTRFTLKYSAGQQDPATLRKTIELYGTKVAPRVRDLLG				19.5898	21.0454	20.4815	20.7494	21.2828	20.9269	21.4946	22.0126	22.0606	19.4923	20.6091	20.8393	21.7636	21.322	22.2923	20.3722	20.9864	21.8559	20.3136	21.7926	0.599244	0.221771	0.256274	0.58828	0.396648	0.00152985	0.00256885	0.00477732	0.00159343	0.012815	0.61413	1.48371	-0.0586733	1.42039		+		+	0.245653	0.0322964	0.926041	0.0490492	0.869577	-0.672803	0.806257
DMKJLJHC_00101 Disulfide bond formation protein D	MSKTLTILGGLAVAGVLGAGGWYASQHSEASLITAAQAQEATADTKDVQTLPDVVLGQEDAPVTVIEYASFTCPHCAHWHETEFPTLKKDYIDTGKVKFIQREVYFDKFGIWAGLIAQCGGDPKYYAISNMLFDKQKEWIGDGKQQTIADNLRKIGLQAGLSQDQVNACMSDEKRAEQLVATYQKNASADKIDATPTFLIDGEKHANMAWDDFKKILDDELAKKAN				23.63	23.6614	23.8326	23.4363	23.3506	23.2831	23.0804	23.5403	23.1062	23.4413	23.312	23.4618	21.8378	20.8287	21.6022	23.708	23.3566	23.2423	23.405	21.4229	0.0890122	0.0627157	0.210951	0.0662885	0.431007	0.0154461	0.013282	0.0124888	0.0135817	0.00991795	-0.351363	-0.46571	-0.302997	-2.2851	+	+	+	+	0.0103117	0.0451707	0.0181325	0.0018315	-0.114347	0.0483667	-1.93374
DMKJLJHC_00104 hypothetical protein	MSKPSPQRLHLVFGGELVDPTRSEFADVSKIDIVGMYPNYATAYAAWKGAAHRTVDDAHTRYFIAHLHRLRDEELEVSPTEELGN				22.9765	22.6743	23.4525	20.6367	19.6962	21.7569	20.8217	20.949	21.7453	22.3009	19.0452	19.5658	23.0681	20.9067	21.9422	23.0344	20.6966	21.172	20.304	21.9723	0.320323	0.842309	0.408688	1.42795	0.882642	0.00968383	0.00210144	0.00297366	0.00158289	0.0145147	-2.3378	-1.86244	-2.73043	-1.06211	+	+			0.0214144	0.0071186	0.057665	0.184919	0.47536	-0.392633	1.27569
DMKJLJHC_00105 hypothetical protein	MAKTLPLLGAALSLDMLAHHHDWILGDQRDLELQSFCWPNTSQSELQQMLTRAQGLLEGHTGRRGLHGPFTGFSLDCADPEIVTVIQDRMLRTLECCAALGADQMVIHSPYTMWKESDLQANPASGFIQIERVRFVLTPVIARAETLGVTLVIENCEDLNPALRVELAARLKSERVRVSLDTGHAQFMHRRLGAPPVDAFIGAAGGALEHVHLQDVDGYGDRHWHPGEGSIAWHSVFKALGRLPKMPRLILEVNDERGLLKGARHLIESGLAR				22.8731	22.7118	22.7224	23.2209	23.2476	23.3471	23.312	23.3339	23.4381	23.4654	23.2968	23.3739	21.156	21.8344	21.7887	22.7691	23.2718	23.3613	23.3787	21.593	0.0736558	0.0542973	0.0550109	0.0688912	0.309628	0.0080571	0.0125237	0.0135628	0.0133361	0.0111592	0.502733	0.592227	0.609583	-1.17607	+	+	+	+	0.00147924	0.000805178	0.0010282	0.00640185	0.0894933	0.10685	-1.67881
DMKJLJHC_00106 Cell division protein ZapE	MTEIYEERVAQGALTPDAAQREVLPILEEIRAGLEAAPAPAKKGFFARKPKPVAPVKGLYFWGGVGRGKSMLMDLFCEHTDVAKRRVHFHAFMQEIQGELETARRANTLDAMRPVAEAVAGSLRLLCFDEMQITDIADAMIVGRLFEALFERGVTIVTTSNRPPEDLYKNGLNRQLFVPFIELIRETLTVRELASPTDYRQDRLSDHEVYFHPANREARAQMDALWDELTGGASGEALVLTVKGRPVELPQFHAGVGRASFWDLCAKPLGPADYLAVAGAVRALLIDDIPLLSATNFNEAKRFVTLIDALYEGKVRLICSAADTPERLYVEGEGTFEFERTASRLREMQGADWGAEA	K06916	zapE; cell division protein ZapE		23.6491	23.5359	23.5492	23.1635	23.4152	23.4777	23.9381	23.7656	23.9118	23.5018	23.3617	23.2333	21.8011	22.4642	21.7885	23.5781	23.3521	23.8718	23.3656	22.0179	0.0505272	0.135798	0.0758777	0.109657	0.315562	0.0141157	0.0132403	0.0193204	0.0132156	0.0149812	-0.22596	0.29373	-0.212477	-1.56012		+		+	0.092091	0.0103647	0.0675744	0.00230864	0.51969	0.0134833	-1.33416
DMKJLJHC_00109 LPS-assembly lipoprotein LptE	MWSSDRRSFLLLAGTAAAVSACGFTPAYGPKGGAATLLNGVLPDAPDTPDAFALVQQLKARLGPPEAPRYRLSYKISTSVLGQGVQPDNSTTRYQLSGMVDYTLRAQGSDAILLTGRVNSFTSWSATGTVVATQAAEDDAHRRLMRILADQIITRLLAQASSLPR	K03643	lptE; LPS-assembly lipoprotein		22.1254	21.7201	22.5402	21.8883	22.1259	22.7209	22.2788	22.2962	21.9353	21.7848	20.6724	21.9285	21.7038	22.4149	21.4236	22.1286	22.245	22.1701	21.4619	21.8475	0.334804	0.350225	0.16617	0.561326	0.417244	0.00516846	0.00614656	0.00593954	0.003532	0.0133114	0.116447	0.0415167	-0.666667	-0.28112					0.751037	0.882789	0.222626	0.498662	-0.07493	-0.783113	-0.397567
DMKJLJHC_00110 Leucine--tRNA ligase	MSRYEPSQSEAKWQTAWNEAELFAARPDPARPKYYVLEMFPYPSGRIHMGHVRNYTMGDVVARYKAAQGYAVLHPMGWDAFGMPAENAAMERGGHPKDWTYGNIADMKEQMRPLGFSLDWTREFATCDPDYYGQQQSMFLDMLKAGLVYRKNAVVNWDPVDMTVLANEQVIDGRGWRSGAEVERRELTQWFFKISDYSEELLSALDGLKDWPEKVRLMQANWIGKSRGLQFAFSTKDAPDGFEALEVYTTRPDTLLGASFAAISPDHPLAKHLERHDPAIAEFVAKCRAGGTTEEAIETAEKLGMDTGITVRHPLNTEVELPVWIANFILMDYGTGAIFGCPAHDARDFEFATKYGLPITPVFEPVEGDYPAAEFVPLKSEPVRYIRGFAGNEIQTGED…	K01869	LARS; leucyl-tRNA synthetase [EC:6.1.1.4]		26.945	26.8916	27.0068	26.1628	26.0002	26.0693	25.9301	25.8653	25.9452	26.2452	26.1499	26.326	21.8019	22.6928	21.5475	26.9478	26.0775	25.9135	26.2404	22.0141	0.0470749	0.0666366	0.0346774	0.07197	0.491035	0.145911	0.0875605	0.0795493	0.0969372	0.014941	-0.870337	-1.03427	-0.707387	-4.93372	+	+	+	+	0.000112516	1.51576e-05	0.000312123	0.00014503	-0.163933	0.16295	-4.06338
DMKJLJHC_00111 hypothetical protein	MNSRRLLQITAVLGLSLALAGCGNRTSGGGSFFGGGTAKQKEANSLSHLGGGDGDNQAIIDGPVRAQTKQSSVWDLFGNKNDPNITIEVNKYLWQASLEVLDFLPIQEVDPFSGVIVTGYGTPPGGGRAYKATVYITDPSLDARSLKVSLSSRGGPVSADTQRAVEDAILTRARQIRIRDSKL				24.5183	24.5485	24.7033	24.2846	24.5315	24.396	24.5043	24.6339	24.3873	24.1989	24.366	24.332	24.4781	21.8971	24.7327	24.59	24.404	24.5085	24.299	23.7026	0.0810422	0.100945	0.10073	0.0721111	1.28093	0.0284663	0.0274508	0.0300383	0.0252379	0.0481595	-0.186003	-0.08155	-0.291077	-0.88741			+		0.111954	0.422775	0.0191915	0.383542	0.104453	-0.105073	-0.701407
DMKJLJHC_00112 Porin	MKKVLFATTALVLSAGVAAAEVSTGGTARMGVMYNGTDWNFSSRIRVKFTLSGQTDGGLEFGASLRADQANTANATGSSGAVYVSGAFGKVSMGDTVGASEALFGDLPEVGYTDLDGAGLGNIAGVGLRANIGANEIPYLTGDDGGTQFDGYNSGPNVLYTGTFGAFSVAASMSDGKDTGREGQISPNGDVDQEGAIAAAYTFGNYTVGAGYEFISGANGTEDQSQAELVGTAAFGNTSVKAYYAKGGKANPLDQGYGIGVTSVFGATTVLGYVNHAENSYNGVNSQDGTAYGIGAAYDLGGGASVVGGIADSDIDGTDTQADLGMKFSF	K08720	ompU; outer membrane protein OmpU		30.8531	30.7854	31.1102	30.7417	30.6344	30.5496	29.9807	30.4707	30.4282	30.3678	30.6853	30.829	30.3029	29.9134	29.8575	30.9162	30.6419	30.2932	30.6273	30.0246	0.13994	0.0785896	0.221644	0.192692	0.198119	2.28406	2.07177	1.656	2.02809	3.8529	-0.274337	-0.623	-0.288893	-0.891633		+		+	0.0729763	0.0282732	0.161384	0.00652243	-0.348663	-0.0145567	-0.617297
DMKJLJHC_00113 hypothetical protein	MGLNDIKDRIAAAERLAARPAGAVQLIAVSKVQPNARVEAVLHEGHRLFGENYVQEAQGKWPDWRAAYPGCKVHMIGPLQSNKAKLACELFDAIHTLDRASLARKLANQAQAQGRCPALFVQVNTGREPQKAGVLPEDLDGFLTQARGMDLPVEGLMCIPPEAEDAAPHFEALAQMAGRNGLAGLSMGMSSDFEAAIAAGATHIRVGSAIFGARDYGTA	K06997	yggS; PLP dependent protein		20.973	20.7884	20.689	20.185	20.1306	19.8257	20.5679	20.3989	20.2037	20.6779	19.9843	20.3787	22.35	22.0913	20.9381	20.8168	20.0471	20.3902	20.3469	21.7931	0.117668	0.158078	0.148821	0.284057	0.613766	0.00208201	0.00133964	0.00172962	0.00163072	0.0128192	-0.769733	-0.426627	-0.469887	0.976277	+	+			0.0052453	0.0335295	0.0967486	0.0917015	0.343107	0.299847	1.74601
DMKJLJHC_00115 GTP cyclohydrolase-2	MKPISPLGPSASERLNRARGDLRMGLPVQLEGQGLATAVEALTPDRLAALRALGPLTLALTARRAQTLKARVYDGDLARIRVPEEADLSWLRALADPADDLRMPMKGPLISLREGDSAPARAAIRLIKSAHLLPAALLVDTPETLPEGLTAIRVAEALEAADIPQSFAPVSAARVPMRAAEAGRLHIFRPDNGAEEHYAIEIGKPDRSKPVLARLHSACFTGDVLGSLKCDCGPQLDAALTMMGEQGAGVLLYLNQEGRGIGLANKMRAYSLQDQGFDTVEANHRLGFEDDERDFRIGAALLKKLGFASVRLLTNNPAKSAMLKANGITVSERVPLKVGRSRHNAAYLATKAAKSGHLL	K01497	ribA; GTP cyclohydrolase II [EC:3.5.4.25]		22.0743	22.119	22.0596	20.236	20.2262	20.6009	19.8484	19.8849	20.1358	19.5836	19.7429	19.5448	21.9918	21.4033	21.3245	22.0843	20.3544	19.9564	19.6238	21.5732	0.0252572	0.174369	0.127736	0.0857024	0.297704	0.00501212	0.00165761	0.00128042	0.000987837	0.011007	-1.72992	-2.12791	-2.46049	-0.51105	+	+	+		0.000155969	2.07707e-05	2.59663e-06	0.0728418	-0.39799	-0.730577	1.21887
DMKJLJHC_00116 Transcriptional regulatory protein WalR	MASLKKILLVDDDTDLREALAEQLVATDDFEVYEAENGHDAVDKARSALYDLVVLDVGLPDTDGRELCKKLRKQGVKCPIVMLTGHDTDADTILGLDSGANDYVTKPFKFPVLLARLRAQLRTHEQSEDAVFQLGPYTFKPAMKMLVDDKDKKVRLTEKETNILKFLYRATDGVVPRDVLLHEVWGYNAGVTTHTLETHIYRLRQKIEPDPSNARLLVTESGGYRLVG				25.3899	25.4521	25.3535	24.0877	23.801	24.3458	23.9578	24.0413	23.839	23.924	23.9577	23.5254	24.4341	22.1017	22.5955	25.3985	24.0782	23.946	23.8023	23.0438	0.0407021	0.222516	0.0829761	0.196311	1.00356	0.049855	0.0219014	0.0203408	0.0178879	0.0305034	-1.32031	-1.45247	-1.59617	-2.35475	+	+	+	+	0.00117508	2.42614e-05	0.000354495	0.0295002	-0.132153	-0.275857	-1.03443
DMKJLJHC_00118 hypothetical protein	MIQIGTLTLDLNDPIVQGLIGAALLALIFAGLWISARRQARELAADLAQAERYREEAQNLREALAASEAAAERLQEVEQALEQTRAQRDGEYRARIAKSEAYDSLQREHGARLEELRGMKKEIEDRFSSVASGVLQKNSEAFLSLVSERFKTHEKTAQEELDRRRDAIEHLVKPLNLRLNEFGEQIQSIEKARNEAYGAIHQQVRSLAEGQSSLGQETRKLVQALRAPKTRGRWGEMQLRQVFEMAGMTENVDFHLEHHMATDEGARRPDAIVHIPGGKSIVVDAKTPLEAYLDALEADTPELQNAAITRHAQQVRNHVKMLASKAYQSQLSETPDFVVMFIPGETFVAAAAEADPGLIEYAFQNKVLISSPTTLMALVKAIAYGWQQEKMAKNAVEVQ…	K09760	rmuC; DNA recombination protein RmuC		21.0437	21.0678	21.0806	21.5601	20.7201	20.9769	21.0708	21.703	21.523	21.2961	20.8216	20.921	21.9341	22.2369	22.3499	21.064	21.0857	21.4323	21.0129	22.1736	0.0153189	0.351463	0.265956	0.204344	0.175525	0.00247114	0.00275193	0.00356157	0.00258736	0.0166884	0.02167	0.36824	-0.05111	1.10962				+	0.934769	0.122273	0.742094	0.000878392	0.34657	-0.07278	1.08795
DMKJLJHC_00120 putative zinc protease	MIRAIFTLPTRLVLAGLFALVLALPARAIEIQQVTSPGGIKAWLVENHDIPFTALDVAFRGGASLDAPGKRGEINLMTATLEEGAGTLDSQQFAAAQEALAAEFGFDVGDDTLEVSARMLTENRDKSVDLLRSALINPRFDQTAIDRVRQQVLSIIASDASDPNALAAETFRKLAYGDHPYGSSLNGTVESVKGLTQSDMFDAKARVMSRDHMVVSVVGDITPAELGPMLDTLLGDLPATGAAMPKPVTPDFKGTVTRVDFDSPQSVVIFGQKGIKMDDPDFFAAYVLNQIIGAGGFSSRLMDEVREKRGLTYGIASYLVDKDDAQTWQGSFASANEKVAKAISVVKDEWSKAATGAVSDKELADAKAYLTGAYPLRFDGNGTIAGIMTGMQLNGMSPD…	K07263	pqqL; zinc protease [EC:3.4.24.-]		19.7431	20.3739	19.9359	21.0393	20.7613	20.794	22.031	22.439	21.952	20.8007	20.8947	20.5777	22.7414	21.1395	20.4428	20.0176	20.8649	22.1407	20.7577	21.4412	0.263943	0.124036	0.213413	0.132945	0.962352	0.00119647	0.00236136	0.00581967	0.00216792	0.0100447	0.847237	2.12306	0.74011	1.4236	+	+	+		0.0147505	0.000901791	0.0239781	0.113818	1.27582	-0.107127	0.576363
DMKJLJHC_00121 putative zinc protease	MRAFLLALLFIAGVTPAVSETVSTFELPNGLQGVVIEDHRAPVVVQMVWYKVGSADEQRGKSGIAHYLEHLMFKGTKTMAPGELSKTVSANGGSDNAFTSYDYTAYFQRIAADRLPLVMKMEADRMRNLQITPEDAKTELQVILEERSQRTDSNVNAQFSEQQRAAQFLNSPYGTPVIGWRREMEGLTRQDALDWYHEFYAPNNAILVVAGDVTPDEVKALAEKYYGPLKPTEGLKPRARPQEPPQRAARHLTFKDDRVAQPYLTRSYLAPERNPGDQKTAAALSVLAEILGGNQASSVLGRKLIYGNGTAIYASAGYDGMSIDPTTFTVSVLPAKDVSLPEAEQALDTALAQFLKEGIDPEQFARIKTQIKAAEIYSRDNTQGLARRYGEALASGFSV…	K07263	pqqL; zinc protease [EC:3.4.24.-]		23.1213	23.116	22.8807	22.9247	23.0086	22.1429	23.8457	23.8468	23.8224	22.508	22.5961	22.4662	22.0016	21.3311	21.9015	23.0393	22.6921	23.8383	22.5234	21.7447	0.112208	0.389827	0.0112629	0.0541634	0.295315	0.00971693	0.00837916	0.0188772	0.00737176	0.0123967	-0.347293	0.79897	-0.51591	-1.2946		+	+	+	0.292635	0.00055779	0.00424399	0.00440747	1.14626	-0.168617	-0.947303
DMKJLJHC_00122 hypothetical protein	MQVRYGTLSIAMAAVLMLTACGNDRTPSLMNLRSSHQGPDEFGIVPNKPLQMPENLAQLPTPTPGGTNLTDPTPEADAVAALGGNPRRVTASGTVPGSDQALVAAASRYGTQAGIRQTLAAEDLAYRKKNDGRLLERLLQVSVYNKAYKPMELNQTAELQRWRRAGVATPAAPPSSAAQDAAK				23.9035	23.8915	23.9927	24.0369	24.1326	24.1136	23.9459	23.9359	23.957	23.9476	23.9358	23.9723	24.0132	21.5263	21.8871	23.9292	24.0944	23.9463	23.9519	22.4755	0.0451096	0.0413611	0.00863827	0.0152018	1.09719	0.0180058	0.0221483	0.0203441	0.0198419	0.020573	0.165137	0.01705	0.02267	-1.45368	+				0.0188445	0.627344	0.53754	0.134498	-0.148087	-0.142467	-1.61882
DMKJLJHC_00124 Bifunctional purine biosynthesis protein PurH	MTRPIPLTRALISVSDKTGLLDFARALSARGVELLSTGGTAKALREAGMSVRDVADLTGFPEMMDGRVKTLHPAVHGGLLALRDNDEHLAAMEAHGIEGIDLLVVNLYPFEETVAKGADYDECIENIDIGGPAMIRAAAKNHAFVTTVVDVADYGRVLAELDRNDGAIGYAFRQKLAQIAYARTAAYDSAVSTWMAGAIGEETPIRRTFAGTLAQTLRYGENPHQSAAFYHDGTNRPGVATAKQLQGKELSYNNINDTDAAFELVAEFGTQKPTVAIIKHANPCGVASGDSVIEAYKRAFDCDRTSAFGGIIALNQPLDAATAEEITKIFSEVIIAPSVEEAAKEVIAKKKNVRLLETGGLPDPASAITTYRQVAGGFLVQGKDNGEITLDDLKIVTER…	K00602	purH; phosphoribosylaminoimidazolecarboxamide formyltransferase / IMP cyclohydrolase [EC:2.1.2.3 3.5.4.10]		27.9232	28.0411	27.9709	27.3141	27.3096	27.2545	26.9276	26.795	26.8667	27.1206	27.0597	27.2282	27.5427	21.3569	27.054	27.9784	27.2927	26.8631	27.1362	25.3179	0.0484426	0.0270833	0.0541966	0.069662	2.80791	0.29808	0.203298	0.153634	0.180362	0.147545	-0.6857	-1.1153	-0.842227	-2.66053	+	+	+		6.29918e-05	2.66878e-05	0.000149426	0.251366	-0.429603	-0.156527	-1.97483
DMKJLJHC_00125 hypothetical protein	MSKDSSRSSAKLSTALNRLAAARAARARPATGFVSQPEPRTIGSFARGRQLVQGNFLFAGYLIESPEANIWDLPMPDATFEEALHGCGWLDDLAAVSDRAARIRAQQWVFGWIDRFGGGAGPGWTPDLTGCRLIRWINHAILVLNGRDRADSERFFRAMGQQTIFLSQRWRSTSPGLPRFEALTGLIYAGLSLTGMEAHAAPAIEALARECATRIDPEGAIASRNPQELLEVLTLLNWAKEALDVAGRTPPGALLDAIARIAPTLRALRHSDGGLARFHGGGRGLEGRLDAALSATGIRGVRREPMAMGFARIQGGRASLIIDAAPPPRGMESANGHASTLAFEMTSGRRPLIVNCGSGVHFGRDWARAGRATASHSTLSIFGYSSSRLGPERLFGRAP…				22.2725	21.8325	21.599	21.2765	21.743	21.882	21.2369	20.6946	21.498	21.6918	21.8248	21.7283	21.9937	22.4592	22.5392	21.9013	21.6338	21.1432	21.7483	22.3307	0.279246	0.258977	0.334595	0.0561176	0.240553	0.00441517	0.00402379	0.00291487	0.00430755	0.0186078	-0.26751	-0.758137	-0.153017	0.429387					0.376768	0.0696795	0.489719	0.174787	-0.490627	0.114493	0.696897
DMKJLJHC_00126 Ribosomal RNA small subunit methyltransferase B	MARPDPARFAALGLIIGVTEERESLSDQIAQDALDGLEPAQRARAQRLALTTLRNLARADRVLKTHLRRKPSADIMALLRLATVELLAEGQAPHGVVDAAVTLAKSAGPKTGSFAGLVNAVLRKVALDGALWAELPAPEMPGWLRGRVMAQHGKRAAQAMEEAHLAGAPLDLTLKGDLADWAERLGAQVLPTGSLRLAAQGKVTDLPGFESGDWWVQDAAASLPARLLAPKPAARALDLCAAPGGKTLQLAAMGAQVTALDISEPRLARLAENLARTGLEAEVIAADALHWTPEAPFDAILLDAPCSATGTIRRHPDLPFVKDGPAIKPLFALQAALLDRALDWLAPGGTLVYATCSLLPEEGEAQIEAALGRHPDLQICPPELPGLDPAWTTPEGGLR…	K03500	rsmB; 16S rRNA (cytosine967-C5)-methyltransferase [EC:2.1.1.176]		21.5631	21.5927	21.7723	21.9034	20.358	19.5921	21.6302	18.8297	21.5692	21.723	21.7841	19.7254	21.9446	22.0058	21.5722	21.6427	20.6179	20.6764	21.0775	21.8409	0.0924663	0.961328	1.30602	0.956385	0.191644	0.00369056	0.00198978	0.00210912	0.00270586	0.0132507	-1.02483	-0.966303	-0.565173	0.198177					0.207828	0.355529	0.452272	0.258181	0.0585233	0.459653	1.223
DMKJLJHC_00128 4-hydroxy-tetrahydrodipicolinate reductase	MSDLPGIVITGASGRMGQMLIRIVHESGKARLVGAVERTGHDWIGRDLGKMMGGAANGVIVTDDPLEAFSGAQAVIDFTAPDATVAFAKLAAQARLTHVIGTTGMTEAHIAQLAPCARHAVIVRAGNMSLGVNLLTQLTKKVAQALDADWDIEVIEAHHNRKVDAPSGTALMLGKAAAEGRGIDLAQNSESGRDGITGARSPGAIGFSAIRGGDIVGEHDVLFAGQGERVILRHVATDRAIFARGALKAALWGQDKAPGEYDMLDVLGL	K00215	dapB; 4-hydroxy-tetrahydrodipicolinate reductase [EC:1.17.1.8]		24.4505	24.3373	24.5058	24.1411	24.1545	24.2826	24.867	24.8934	24.8641	24.2421	24.3397	24.1046	24.2034	21.7736	21.5687	24.4312	24.1928	24.8748	24.2288	22.5152	0.0701351	0.0637885	0.0131873	0.0964469	1.19667	0.0254989	0.0237113	0.0387215	0.0240406	0.0211467	-0.238453	0.4436	-0.202377	-1.91598	+	+			0.0236486	0.000923586	0.0743563	0.086642	0.682053	0.0360767	-1.67752
DMKJLJHC_00129 30S ribosome-binding factor	MAKNRFTSARGPSQRQLRMGELIRRTLSDLLMRGDVHDPDLNRISVTVGEVRCSPDLKVATAYVTPLGGKGGPELIAALARNKGELRHLLGKEMTAKYVPDLRFRLDETYDQMDETRRLFSDETVQRDIAAPESDEDDLD	K02834	rbfA; ribosome-binding factor A		21.2719	21.0659	20.8338	20.2453	19.5633	19.8008	20.3137	20.5012	18.8807	21.2356	19.7938	21.0214	21.6808	21.9545	21.3199	21.0572	19.8698	19.8985	20.6836	21.6518	0.178943	0.282673	0.723778	0.635228	0.259905	0.00245952	0.00118473	0.00123011	0.00205932	0.0116229	-1.18742	-1.15869	-0.373627	0.59454	+				0.00738821	0.0928774	0.468192	0.0561219	0.02873	0.813793	1.78196
DMKJLJHC_00131 tRNA pseudouridine synthase B	MARKKGRDISGWLIVDKPAGITSTSVVNKVRWALEAKKAGHAGTLDPAATGVLAVALGEATKTVPFITDALKCYRFQVRLGAATNTDDAEGEVIARSDLRPSDAEIEHALTRFQGDISQVPPQFSAVKVEGERAYTLARAGEEMELAARPLYVESLVTCGRPDADTLELEMVCGKGGYVRSIARDLGQALGSLGHVLWLRRVWSGPFSAQAGMTLEQIEALARTPELDSHLLPLELGLDDLPELKATPEGAARLRNGNPGMVLHSDVDWGDEVWVSHAGTPLAVGIYKSGEVHPSRVFNL	K03177	truB; tRNA pseudouridine55 synthase [EC:5.4.99.25]		21.568	21.2634	21.449	21.4223	21.6734	21.827	22.0782	21.5948	21.7096	19.9527	21.484	21.8028	22.563	21.8521	21.5238	21.4268	21.6409	21.7942	21.0798	21.9796	0.125351	0.166788	0.206216	0.807532	0.433754	0.00317764	0.00404366	0.00457722	0.00271019	0.0145885	0.214107	0.367413	-0.346983	0.55282					0.220334	0.0976401	0.580555	0.158394	0.153307	-0.56109	0.338713
DMKJLJHC_00134 30S ribosomal protein S15	MSITVEDKNALIKEYATKEGDTGSPEVQVAILTKRIANLTEHFKEHKKDNHSRRGLLMLVAQRRKLLDYVKAKDVSRYQSLIERLGLRR	K02956	RP-S15; small subunit ribosomal protein S15		26.4298	26.5254	26.2866	24.315	24.2527	24.534	24.7933	24.8849	24.7313	24.2603	24.1595	24.1833	24.4026	21.5638	23.3864	26.4139	24.3672	24.8032	24.201	23.1176	0.0981337	0.120652	0.0631155	0.0429896	1.17439	0.100782	0.0267599	0.0368455	0.0235818	0.032105	-2.04669	-1.61077	-2.21291	-3.29634	+	+	+	+	4.90612e-05	4.05839e-05	8.17732e-06	0.0167379	0.435917	-0.166217	-1.24965
DMKJLJHC_00135 Osmoregulated proline transporter OpuE	MGVGVWISLTAYFVLMIGIGVYAWRKSTANSEEYMLGGRNLPPAVAALSAGASDMSGWLLLGLPGALFVSGLTQSWIGIGLFVGAFVNWIVVAPRLREQTERYDNSLTIPGFLGNRFPSQAHLLRMVSAVIIVVFFAVYTASGLVGGGKLFVSAFGGSYMTGVILTLGIVLIYTVIGGFLAVSLTDFVQGCIMMLALVIMPIVILTTGQGGGVDQAANRLTDIDPNFLSMTSGLTFIGWLSAVAWGLGYFGQPHIIVRFMAVRSVADVPKARNIGMAWMAISLIGAICVGIFGRAYAERNGLNIADPETIFIVLSNLLFNPLITGFLYAALLAAIMSTVSSQLLVSSSSLTEDFYKMVLNRDASDKTLVNVGRLAVLAVGIAAVIIARNPDSKVLGLVS…	K03307	TC.SSS; solute:Na+ symporter, SSS family		23.6752	23.8733	23.9164	26.7428	26.5357	26.5555	25.2509	25.6765	25.0161	26.6103	26.729	26.4796	25.972	21.8349	25.0584	23.8216	26.6113	25.3145	26.6063	24.2884	0.105047	0.0932955	0.27335	0.101828	1.77456	0.0167119	0.126771	0.052519	0.124922	0.0722807	2.78968	1.49286	2.78467	0.466757	+	+	+		9.56876e-06	0.00196238	1.13239e-05	0.729226	-1.29682	-0.00501667	-2.32293
DMKJLJHC_00137 Polyribonucleotide nucleotidyltransferase	MFNTVKKSIQWGEEELTLETGKVARQADGSVIATLGETSVMANVTFAKAPKPGQDFFPLTVHYQEKYYAAGKVPGGFFKREARPSEKETLTARLIDRPCRPLFVPGFKHEVLVMCTVLSHDLVNEPDIVAMIAASAALTISGVPFMGPIAAARVGFSDGEYILNPEVDDMQKLRENPEQRLDLVVAGTKDAVMMVESEAYELSEAEMLGAVKFGHEAMQPVLDLIIDLAEAAAKEPFDYTPPDYSELYAAVKSIGETEMRAAFALKDKQERTNAISAAVASIKEKLSEEQLEDANLGSAIKKLESSILRGDIINGGARIDGRDNKTVRPIVSEVGILPRTHGSSLFTRGETQALVVTTLGTGDDEQIIDALHGNSRSNFLLHYNFPPYSVGEVGRVSGP…	K00962	pnp; polyribonucleotide nucleotidyltransferase [EC:2.7.7.8]		29.9628	29.9999	29.8995	29.3433	28.9376	29.3038	29.1487	29.1715	29.1188	29.1391	29.2218	29.3013	28.045	26.3866	28.0299	29.9541	29.1949	29.1464	29.2207	27.4872	0.041456	0.182671	0.0215771	0.0662143	0.778224	1.17239	0.759884	0.747855	0.764998	0.663656	-0.7592	-0.807723	-0.733343	-2.46692	+	+	+	+	0.0045878	1.66258e-05	0.000186074	0.0110184	-0.0485233	0.0258567	-1.70772
DMKJLJHC_00141 Alkyl hydroperoxide reductase subunit C	MGLRINDIAPDFTADSTSGEIKFHDWLGGDYAILFSHPKDFTPVCTTEFGAVAKLAPEFEKRHTKVMGVSVDSVSEHTKWKADIEKVAGAPANFPIIDDTSLTVSKAYDMLPAEAYMPDGRTPADSATVRTVFIIGPDKKVRLTMTYPMSVGRNFAEILRALDAVQATDGAPFATPANWVPGQDVILALSVSTEDGEAKYGAVDTKLPYLRTVKLPG				25.7836	25.8335	25.9398	25.5133	25.3777	25.3938	25.4586	25.8105	25.5974	25.4503	25.4132	25.5219	25.6433	22.4382	25.1165	25.8523	25.4283	25.6222	25.4618	24.3993	0.0651412	0.0604952	0.144729	0.0451148	1.40331	0.0682836	0.0558318	0.0650021	0.0565069	0.0780573	-0.42405	-0.230153	-0.39053	-1.45298	+		+		0.00251723	0.109593	0.00222767	0.217375	0.193897	0.03352	-1.02893
DMKJLJHC_00142 3-succinoylsemialdehyde-pyridine dehydrogenase	MIEKRAFYINGEWVDPKTARDYTVIDPATEDGCAIISLGAEGDTDAAVAAAKAALPGWKATDPAERIAAVERIAEIYDRRADEMAQAISLEMGAPIDLARRNQVGSGSYHIANFLTAAKAFPWVHTLGDGTPGAMIAHEAIGVVGLITPWNWPMNQVTLKAIPAILAGCTMVLKPSEEAPLSSLLFAEIVDEAGLPPGVFNLVNGDGAGVGTQLSSHPDIEMISFTGSTRAGRAISKAAAETLKRVTLELGGKGANLIFADADEDAVARGVRSCFQNSGQSCNAPTRMLVERPIYDRAVEIARETAEATQVDNPRESGRHIGPVVNAVQFDKIQGLIETGIKEGAKLVAGGPGRPEALNRGFYVRPTVFADCDPSMTIMNEEIFGPVLSIMPFETEEQA…	K00128	ALDH; aldehyde dehydrogenase (NAD+) [EC:1.2.1.3]		26.622	26.6671	26.4169	26.2942	26.1304	26.2092	26.0406	26.0351	26.0298	26.0599	26.004	25.8386	26.3672	21.1408	25.814	26.5687	26.2113	26.0352	25.9675	24.4407	0.108893	0.0668709	0.00441356	0.0939642	2.34428	0.11219	0.0960712	0.0865492	0.0802322	0.0803253	-0.35737	-0.533457	-0.601113	-2.128	+	+	+		0.0167473	0.00228553	0.00410212	0.26899	-0.176087	-0.243743	-1.77063
DMKJLJHC_00143 Exodeoxyribonuclease III	MAFTLASWNINSVRLREALVCKLLSEEAPDVLCLQECKSPVEKIPTEAFRALGYTHMVARGQKGYNGVAILSKLPLQEVSAHDFADLGHARHVAAQLENGVTIHNFYVPAGGDIPDRAVNEKFGQKLDYLTQMRDHFAAERPAKSILVGDLNIAPREDDVWSHKQLLKIVSHTPIEVEHLNDVMQAGAWVDVTRQDIPEGQLYSWWSYRARDWDAADKGRRLDHVWATPDIATAAHGSRVLRDARGWEQPSDHAPVFASFDL	K01142	E3.1.11.2; exodeoxyribonuclease III [EC:3.1.11.2]		23.5607	23.518	23.6141	23.1135	22.8493	23.1453	23.2784	22.925	23.5955	23.0401	22.9107	22.8822	21.6858	22.3087	22.0481	23.5643	23.036	23.2663	22.9444	22.0142	0.0393426	0.13269	0.27386	0.0687128	0.255437	0.0139812	0.0106352	0.0126981	0.00986924	0.0149421	-0.528243	-0.297983	-0.6199	-1.55009	+		+	+	0.00570074	0.202389	0.00037843	0.00105915	0.23026	-0.0916567	-1.02184
DMKJLJHC_00144 Thioredoxin 1	MLELGGTQDATPANDLIKDVTEADFMAEVIEKSQTVPVIVDFWAPWCGPCKQLGPAIESEVVAAKGAVVLAKVNVDENQMIAGQLRVQSIPTVYAFWQGQPVDGFQGALPASEVKAFVAKVAEMGPGADNGLADALEAAEAMLAEGEAEDAAETFAAIVEEDPDLVEAHGGLIRARVAQGDLDAAGAALAAVPPKLSDAGPVEAARAQYDLAKQAQSAGPLDELKAKVEADATDHQARFDYAQALYAAGEPAAAVDQLLELFRRDREWDNEAAKTQLFTIFDALKPSDPIVQAGRRRLSSMIFA	K05838	ybbN; putative thioredoxin		25.0619	24.5002	24.9599	24.6292	24.4601	24.5861	25.3614	25.3553	25.132	24.7454	24.9316	24.9208	23.4468	22.2329	20.6219	24.8407	24.5585	25.2829	24.8659	22.1006	0.244354	0.0717245	0.106724	0.085355	1.15704	0.0338672	0.0305528	0.0513814	0.0373885	0.015864	-0.282183	0.442257	0.0252867	-2.74011				+	0.192171	0.0788917	0.896789	0.0305908	0.72444	0.30747	-2.45793
DMKJLJHC_00147 2-octaprenyl-6-methoxyphenol hydroxylase	MDNPVRAAIVSTMTYDTDILIVGGGLNGPTLALALASAGHRVTLVDAAPARARASDDFDGRAYALAIASQKLLSALGLWEALAPTAQPMMEVKAGDGHAGEGISPLMLHFDSRELDQSPVGYMLEDRFLYRALLEAMEASEAITLIHDTQVTAQEVEPGGVTATLSSGERLRARLLVGADGRRSGVAERAGILRDGWDYGQVALVTALEHAQPHHGVAHQVFMPSGPLAILPLTGNRSSIVWSESAEAARAIMALDDADFMAILRPRFGDFLGEITLAGARFSYPLNLTLARSYVSPRLALVGDAAHGVHPIAGQGLNLGLRDVAALAEVITEARRRGEDIGALDVLERYQGWRRFDSTTLALGMDSVNRLFSNDNPILRLGRDLGMGMVQAMPGLRRG…	K03185	ubiH; 2-octaprenyl-6-methoxyphenol hydroxylase [EC:1.14.13.-]		23.0325	22.4596	22.0897	22.2061	22.9161	23.0257	23.0023	23.0512	22.6406	22.7002	22.7932	22.8835	22.4087	21.4495	22.5829	22.5273	22.716	22.898	22.7923	22.147	0.387855	0.363284	0.183135	0.0748387	0.498332	0.00681365	0.00851927	0.00983722	0.00888184	0.0163832	0.188703	0.370723	0.265013	-0.38026					0.641928	0.288679	0.396448	0.442417	0.18202	0.07631	-0.568963
DMKJLJHC_00148 Glutamyl-tRNA(Gln) amidotransferase subunit A	MEWRLAGAAEQGRAIAAGELDPVEQVEAYLSAADASENIYARMTAQRARDEAMAAHQRAKSGRRYGALDGVALSWKDLIDTAGVGTEAGSRLLKGRVPEADAEALRVATLGGAVCLGKTHMTELAFSGLGVNPMTATPGNIHDPALAPGGSSSGAALSVSRGLAAAAIGSDTGGSVRVPAAWNDLVGLKTTHGRLSLQGIVPLCRRFDTLGPITRNVEDAAHVLALLEGRPVPDLRETSLRGKRLLVLEGLAFDQAREAPVQAFEAAVARLEKAGAIIERRGLSMVEAAVGLSGVLFSPEAYGEWKHEIEAAPDKMYPVILERFRTGRDVLASDYLAAWHALEGYRAEYQEQTAQYDAVLVPTAPILPPNTQKLLTDRSYFETENLLALRNTRIANVLG…	K02433	gatA; aspartyl-tRNA(Asn)/glutamyl-tRNA(Gln) amidotransferase subunit A [EC:6.3.5.6 6.3.5.7]		24.2992	24.517	24.3781	24.1453	24.4537	24.1444	24.2804	23.8307	24.2488	24.3829	24.3031	24.2158	23.2822	22.0214	21.9809	24.3981	24.2478	24.12	24.3006	22.4282	0.0900319	0.145596	0.20494	0.0682497	0.604127	0.0249205	0.0246333	0.0229472	0.025267	0.0199083	-0.15032	-0.278113	-0.0974967	-1.96994				+	0.282133	0.153741	0.289325	0.0103302	-0.127793	0.0528233	-1.81962
DMKJLJHC_00149 LL-diaminopimelate aminotransferase	MDFPERFSNLPEYAFPRLRELLDSHAPGGEPLAMSIGEPRHPMPAFVGEVLAQSVAEFGKYPANDGTPELLAAISDWLKHRYKVDIGPDRIMALNGTREGLFNAALALSPETKRGKKPVILIPNPFYQVYAVAAAAAGAEPVFVPASAETGFLPDYASLPTEVLDRVTIAYLCSPSNPQGRVASRAYLTDLLALAETHDFRVFADECYSEIWREAPPPGAAEVAAEIGTDPERVVIFHSLSKRSNLPGLRSSFVASGPRNIREIRRLRAYAGAPLPLPIQRVSERVWRDEAHVTENRRLYAEKYAIAGKIFSGIDGADLPQGGFFLWLPVADGEAAALKLWQKTGIRVLPGAYLARDVNGFNPGKEFIRVALVAPKEETQRALTELRDCLYG				24.9417	24.9442	24.7446	24.6419	24.7784	24.8594	24.549	24.2821	24.3333	24.6881	24.6736	24.7285	23.0721	21.5662	21.6637	24.8768	24.7599	24.3881	24.6967	22.1007	0.0934943	0.0897561	0.115659	0.0232517	0.68804	0.0347273	0.0351308	0.0276338	0.0332506	0.0158651	-0.11693	-0.488737	-0.180107	-2.77619		+		+	0.271041	0.00967988	0.0573523	0.00482061	-0.371807	-0.0631767	-2.65926
DMKJLJHC_00152 hypothetical protein	MKKFLALGLVLLVAACGGPKGPPDNLDDACAIIRERPQYFNAMRRTEARWGVPVAVQMATIHQESKFDGNAKTPYQFALGIIPLGRQSSAYGYSQALDGTWEEYREDTHRYGAKRNRISDATDFMGWYMDGTTQKLGISKSDARDQYLAYHEGRAGYARGSHRSKAWLLAVANRVQARAQMYDIQLESCRR				21.2024	21.3285	21.3402	19.6888	21.3433	20.1696	21.2224	20.6132	20.2853	21.1921	21.3365	21.1945	22.2777	22.1206	21.8483	21.2904	20.4006	20.707	21.2411	22.0822	0.0623929	0.69489	0.388261	0.0675075	0.177395	0.00289092	0.00171158	0.00215431	0.00303068	0.0156635	-0.889803	-0.583407	-0.0493067	0.79183				+	0.145621	0.103876	0.490357	0.00399119	0.306397	0.840497	1.68163
DMKJLJHC_00156 Free methionine-R-sulfoxide reductase	MSVDYEDLAKRIAALTAGETDEVALMATLACEIHHSDDRFDWTGFYRVTEPELLKIGPYQGGHGCLVIPFSRGVCGAAARERQTQLVADVEAFPGHIACASSTRSELVIPVFAKRGVIAVLDIDSDQPDAFTQRDADALEAILADVFGEL	K08968	msrC; L-methionine (R)-S-oxide reductase [EC:1.8.4.14]		21.6972	20.1952	21.5773	20.8004	19.6732	20.6461	21.1548	19.6336	20.574	21.4417	21.032	21.3494	21.9622	22.7354	21.8987	21.1565	20.3732	20.4541	21.2744	22.1988	0.681554	0.499002	0.626804	0.175472	0.38033	0.00263481	0.00167943	0.00180797	0.00310145	0.0169814	-0.78333	-0.702433	0.117823	1.04221					0.259912	0.343762	0.824473	0.13199	0.0808967	0.901153	1.82554
DMKJLJHC_00159 Pyridoxine 5-phosphate synthase	MPKSLRLGVNVDHVATIRNARGSAYPDPLRAALMAEAAGANGITAHLREDRRHIRDADIDALMAGLKVPLNFEMAATPEMQKIALGHRPHACCIVPEKREEVTTEGGLDVAGEVARLTDFVAPLVEAGIRVSMFIGHDPAQIEASAQIGAQVIELHTGLYCDLHAEGKFAERDHELEALRAGAAYAASLGLEVHAGHGLSFDTVGPIAAIKQVRELNIGHFLIAEAVFLGLDPAITHMRRLMEAARG	K03474	pdxJ; pyridoxine 5-phosphate synthase [EC:2.6.99.2]		23.8627	24.0724	24.2752	23.9326	24.0479	24.4732	24.1893	24.2714	24.1452	24.0464	23.8443	23.9859	23.6197	21.8577	22.2741	24.0701	24.1512	24.2019	23.9589	22.5838	0.168414	0.232493	0.0522872	0.0846982	0.751962	0.0198522	0.0230387	0.0242884	0.019938	0.0221768	0.08116	0.13187	-0.111193	-1.48623					0.709728	0.3499	0.451106	0.0525745	0.05071	-0.192353	-1.56739
DMKJLJHC_00162 Signal peptidase I	MAKKKTDGGIMETVKTIFWALLIAGVFRTLFFQPFWIPSGSMKDTLLIGDFLFVNKMAYGYSKYSCPFSACPISGRILSRAPHRGDVVVFRHPTQDVDFIKRLIGLPGDTIQVTGGHLLINGKPVPEKADGDFKEIMAPQGPQQLMPRCANAPVGEGDVCIKHRYIETLPNGVSHDILKITDSGYANNTPVFTVPAGEYFMMGDNRDNSEDSRFSQAVGGVGFVPAANLIGRADRIMFSSAGRSLFYFWTWRADRFFKAIH	K03100	lepB; signal peptidase I [EC:3.4.21.89]		24.7902	24.7213	24.9589	24.3012	24.3581	24.333	24.1605	24.1593	24.268	24.2512	24.1189	24.0768	22.2793	20.8349	21.3905	24.8235	24.3308	24.1959	24.149	21.5016	0.099835	0.0232953	0.0509448	0.0742928	0.594842	0.0334658	0.0260915	0.0241877	0.0227459	0.0104738	-0.49271	-0.627517	-0.6745	-3.32189	+	+	+	+	0.00244735	0.00137692	0.00155714	0.00146556	-0.134807	-0.18179	-2.82918
DMKJLJHC_00163 Ribonuclease 3	MKLSAEIKAFERRLGYDFTKPELLLRALTHSSISTTTRPDNQRLEFLGDRVLGLVMAEALFEADRAASEGQLAPRFNALVRKEACADVARQIDLGAVLKLGRSEMMTGGRRKLALLGDAMEAVIAAVYLDTGFDGARALILRLWGARLESVEQDARDPKTALQEWAQARGLQPPRYEITGREGPDHAPKFTIEVLLDNGARETAQAGSKRQGEMAAAKVLLARLKESE	K03685	rnc; ribonuclease III [EC:3.1.26.3]		20.9203	20.7426	20.8357	21.0503	20.7435	21.0821	21.1723	21.255	21.4706	19.0962	20.416	20.6587	22.1266	21.6248	22.2675	20.8328	20.9587	21.2993	20.0569	22.0063	0.0725819	0.152675	0.125741	0.686543	0.275819	0.00210525	0.00251999	0.00324801	0.00133377	0.0148607	0.125827	0.466467	-0.775903	1.17346		+		+	0.351899	0.0104675	0.187165	0.00434364	0.34064	-0.90173	1.04763
DMKJLJHC_00164 GTPase Era	MTEPTRAGFVALIGEPNAGKSTLLNAMVGAKVSIVTHKVQTTRARIRGVAMEGQSQIVFVDTPGIFRPRRRLDRAMVQAAWGGAADADTVVLLIEAHRGLTEGGKAIIEALRQREDLRVALAINKIDKVKADALLGLTAQLNDAYPFTKTFMISAEKGHGVADLKAWLAGEMPEGPWLYPEDQIADLPLRMIASEITREKLTLRLHEELPYQLTVETENWEEREDGSVRIDQLIYVARDGHKGIILGHKGETIKAISKAARLELIEFLDRPVHLFMQVKVRPNWLDEAERYSEMGLDFKDGN	K03595	era; GTPase		24.0825	23.9809	24.2302	24.2149	24.3033	24.1906	24.3471	24.2536	24.4961	24.006	23.8726	24.138	22.0091	22.2019	21.8501	24.0979	24.2363	24.3656	24.0055	22.0204	0.102385	0.0484098	0.0998875	0.10835	0.143814	0.0202384	0.0244373	0.0272058	0.0205931	0.0150063	0.13839	0.267717	-0.0923533	-2.07751				+	0.159035	0.0571675	0.430418	7.63621e-05	0.129327	-0.230743	-2.2159
DMKJLJHC_00168 L-amino acid N-acyltransferase MnaT	MIRDATPDDAAAIAEIYNDAVRHTTAIWNEIEIDAQNRSDWIADRQGAGYPVLVWEEAGRAVGYASFGPFRPHDGYHLSVEHSVYVHRDHRGGGKGAQMMAALIDRAREGGFHVMVGAIDASNEGSVRLHERLGFQHIGTMPQVGKKFGRWLDLALLQLVLDDRAQP	K03823	pat; phosphinothricin acetyltransferase [EC:2.3.1.183]		20.2716	20.4515	18.982	19.5492	21.5445	21.1885	22.1572	22.1719	22.1253	20.3253	20.5106	21.6652	21.7331	21.1033	20.9446	19.9017	20.7607	22.1515	20.8337	21.2604	0.654485	0.868945	0.0194545	0.592813	0.340512	0.00110408	0.0021969	0.00586341	0.00228508	0.00886112	0.85903	2.2498	0.931983	1.35867		+			0.326654	0.00828388	0.209832	0.0597698	1.39077	0.0729533	0.49964
DMKJLJHC_00169 3 beta-hydroxysteroid dehydrogenase/Delta 5-->4-isomerase	MARTILVTGITGFIAKRIAYDLLARGDTVRGTLRKAARGDEVRAAMHGLPPEALERLSFVEADLMDNRGWAAAMEGVDAVLHTASPFPLSKPKDEMDIISPAVEGTKRVLRAAQKAGVTRVVLTSSMEAVMHGVSSKPMTEADWSDPEAPSCSPYTRSKIFAERAAWSVVEDHPEMQLTVINPGLVCGTPMDRHTGSSVAVIERIVAGRDPMLPDLDLPVVDVADVSAAHIAALDHAESIGKRYICAERFISFRDMAAAIKVALPERRIAQKVAPKFLLSLLGLFDAQIALILPLIGKKMTLSHAAATRDLGITFVPADEAAVRTAQFIAAK			K00091	23.1562	23.1056	23.1274	23.4876	23.4799	23.3871	23.7228	23.6334	23.7104	23.3427	23.2288	23.3492	23.0423	21.3583	21.9986	23.1297	23.4515	23.6889	23.3069	22.1331	0.020722	0.0456921	0.0395132	0.055317	0.694005	0.0103452	0.0141848	0.0170196	0.0126887	0.0162256	0.32179	0.55914	0.177167	-0.996667	+	+	+		0.0008189	5.95466e-05	0.0132473	0.112205	0.23735	-0.144623	-1.31846
DMKJLJHC_00170 (2S)-methylsuccinyl-CoA dehydrogenase	MAHDGAEMPMTIILDDITSLSGACLPELEALVARATEALRGTVTRDGRVSATALETHQYQAHGVAWLATYHQALVQLHAWALRLSEAGTLGDMERLILQIGFGEYLAQIAGGLQMNQGEMVRLSDMGIDWTPSDAAATLIAQGNSNAARMALVALIRDVQGRSIFGQSGLDDELEMIREQFYRYAEDRVKPFAHEWHLKDELIPISVIEELAELGVFGLTIPEAYGGLGLSKASMAVVTEELSRGYIGVGSLGTRSEIAAELIICGGTEAQKEKWLPGLASGEILSTAVFTEPNTGSDLGALRTRAVKDGDDWLVTGNKTWITHAQRTHVMTLLARTDPESTDYKGLSMFLAEKEPGTDDTPFPTPGMTGGEIEVLGYRGMKEYELAFDGFKVRGENLL…	K14448	mcd; (2S)-methylsuccinyl-CoA dehydrogenase [EC:1.3.8.12]		23.2151	23.3184	22.7698	20.1534	19.7214	21.2238	21.7818	21.4418	21.8096	21.4625	19.5191	22.1863	22.0729	21.3694	21.9885	23.1011	20.3662	21.6777	21.056	21.8103	0.238018	0.63156	0.167195	1.12619	0.313669	0.0101418	0.00167126	0.00422216	0.00266574	0.0129725	-2.73491	-1.42337	-2.04513	-1.29084	+	+		+	0.00459139	0.00228809	0.0658703	0.00976165	1.31154	0.68978	1.44407
DMKJLJHC_00173 Succinyl-diaminopimelate desuccinylase	MTTDAIALSADLIRCPSVTPEEGGALVLLSELLSEAGFDCTRVDRAGTPNLFARWGEKGAARSFGFNGHTDVVPTGDTAAWSRDPFGGEIEGGILWGRGAQDMKTAVAAFAAAAIDHVRDTPPDGAIVLAITGDEEGPGRDGTRALLDYMSEQGEAMSVCLVGEPTCPEVMGEMIKIGRRGSLTFRIEAQGRQGHAAYPHRALNPLHALVDLLGKMTAEPLDTGTAHFQPSTLQVTTIDCGNPANNVIPARATATVNIRFNDAHSGASLIKWASDLAQTIARESGVTLTLNPDISGESFLTLPGPFVDLVAQAVADETGVVPELSTSGGTSDARFIKDHCPVVEFGLVGDRMHQIDEQVPIAQIATLKQIYARILKDYFA	K01439	dapE; succinyl-diaminopimelate desuccinylase [EC:3.5.1.18]		25.5687	25.3625	25.2552	25.1197	25.1927	25.1648	25.639	25.0246	25.2122	25.4443	25.3412	25.4631	21.9576	21.6633	20.6617	25.3955	25.159	25.2919	25.4162	21.4275	0.130109	0.0300623	0.257071	0.0535972	0.55473	0.0497498	0.0463276	0.0517033	0.0547499	0.00994976	-0.236417	-0.103533	0.02075	-3.96793				+	0.0664986	0.638069	0.844996	0.000596208	0.132883	0.257167	-3.73152
DMKJLJHC_00175 Ribonuclease R	MNNASQTPSRQQILDWLNDNPGHSAKRDIARAFGVKGPAKIELKRILREMQAEGLIEKRARKFHDPNSLPPVTVLRMLREDASGDQWAEPAEWEGEGAAPSVLFIPKKGEPALAEGDRILGRLTPVEDESYAYQARMIRKIGEAAHRVVGIFRKSAEGGRIMPIDKGISNEWQVPAAATLDAKDGELVEAEQTGPRGRMGLPKARVIEVLGDPSAPRAVSLIAIHQHGIPDDFPDAVVAEADAARPAKLEGREDLTDLNFVTIDPADARDRDDAVLVLPDDDPKNAGGHHLWVAIADVAHYVTPGSELDREARKRGNSSYFPDRVVPMLPDSLSGDLCSLHENVDRAVLAVKMTIDAQGRKIAHRFTRGMIRSIASLKYSQVQDAQDGNPDEKTEDLVE…	K12573	rnr; ribonuclease R [EC:3.1.-.-]		24.5985	24.6527	24.601	24.0925	23.6224	24.0816	24.1874	23.669	24.2804	24.2252	24.0644	23.9414	22.0497	21.8725	21.5606	24.6174	23.9322	24.0456	24.077	21.8276	0.0249698	0.219058	0.268971	0.116202	0.202209	0.0290113	0.0197929	0.0217942	0.0216387	0.0131293	-0.685227	-0.571767	-0.540417	-2.7898	+	+	+	+	0.0117341	0.0402028	0.00300794	4.19241e-05	0.11346	0.14481	-2.10457
DMKJLJHC_00178 Phosphoenolpyruvate carboxykinase (ATP)	MNNGHVNPAKRLEAQGIEGLGTVYYNLLEPALIEEAIKRGEGTLGKGGAFYCTTGAHTGRSPKDKHIVRTASVEDTVWWDNNNPMSPEAFDLLHADMLAHLQGRDMFVEDLYAGSDPAHRLDVRLVAELAWHALFLRTMLRRPERAELDSFDPEWTIINCPSFKADPARHGCRSETVIAFNFDKKVILIGNTAYAGENKKGVFTLLNYILPGKDVMAMHCSANHAIDDPDDAAVFFGLSGTGKTTLSADPSRILIGDDEHGWSEKGIFNFEGGCYAKTINLSKEAEPEIYATCSMFGTVVENMVFDPETKELDFTDSSITENMRCAYPLHYISNASDNALGGHPKNVIMLTCDAFGVLPPIARLTPAQAMYHFLSGFTSKTPGTEMGVIEPVPTFSTCF…	K01610	E4.1.1.49; phosphoenolpyruvate carboxykinase (ATP) [EC:4.1.1.49]		25.2893	25.348	25.2473	26.4969	26.6514	26.6335	26.3962	26.136	26.3127	26.6767	26.8257	26.8532	25.2737	21.3798	22.0255	25.2949	26.594	26.2816	26.7852	22.893	0.0413099	0.0690084	0.108459	0.0775364	1.70391	0.0463992	0.125254	0.10267	0.14141	0.0274763	1.29909	0.986737	1.49029	-2.40189	+	+	+		2.17589e-05	0.000274317	1.79079e-05	0.117057	-0.312353	0.191203	-3.70098
DMKJLJHC_00179 Transcriptional regulatory protein CreB	MSRIALVDDDRNILTSVSMTLEAEGYDVETYNDGQAAFDAFSKRLPDMAVLDIKMPRMDGMELLQKLRLKTAMPIIFLTSKDDEIDEVLGLRMGADDYVKKPFSQRLLVERIRALLRRQDAISTGEVATTEENKVMVRGALEMDPLRHAVTWKGKDVTLTVTEFLLLQALAQRPGFVKSRDQLMDVAYDDQVYVDDRTIDSHIKRLRKKMRTADDEFSAIETLYGIGYRYNEE	K14981	chvI; two-component system, OmpR family, response regulator ChvI		25.6674	25.9784	25.903	25.5294	25.6661	25.6613	25.3431	25.3094	25.42	25.5251	26.0023	25.5429	24.3888	22.3176	23.019	25.8496	25.6189	25.3575	25.6901	23.2418	0.132436	0.0633531	0.0462716	0.220878	0.860104	0.0681547	0.0637201	0.0541079	0.0661951	0.0349911	-0.230663	-0.492073	-0.159507	-2.6078		+		+	0.0904131	0.00770324	0.430537	0.0132858	-0.26141	0.0711567	-2.37714
DMKJLJHC_00180 Alkaline phosphatase synthesis sensor protein PhoR	MSIAGRIGLGRSRRTKSRPTKAGTDVIFGEDWVGPEDGVDEDLRRGRARRGMIALNRSPLARKIIIFNLLAMVVLVVGVLYLNPFRDTLVMQREAGLVNEAQLAADVFEAQLPAGAPVNLAAGDGIDPAATIAGIQLPDGSNLYLFDPSAALIGTSTMGKRAPAEQVEGLELDRRTTILTDLLGKIWGTMSRVIARSGDNATVNPLETVRQIVPSALAGKTQILSQKNAAGATIFAVATPVRQGDRVVGVLGLTSVAGQIDALVAIEREQVLQMFVIAIIVSIGLSLVLASTIANPLSDLAAAAEIGREKNARKMAPARVRIPDLTARPDEIGRLSGAMRGMVAALYDRIDANEQFAADVSHEIKNPLASLRSAVSSLRMVKKEEHRDKLLDVIDHDVR…	K14980	chvG; two-component system, OmpR family, sensor histidine kinase ChvG [EC:2.7.13.3]		23.1068	23.2988	23.152	23.0534	23.03	23.0087	22.8644	22.3834	22.8615	22.712	22.734	22.8904	21.9444	21.1615	21.3068	23.1859	23.0307	22.7031	22.7788	21.4709	0.081951	0.0182388	0.226023	0.0793936	0.340038	0.0107557	0.0105962	0.00859409	0.0087992	0.0102536	-0.155153	-0.48279	-0.40708	-1.71496		+	+	+	0.0592014	0.0468731	0.00725417	0.00227136	-0.327637	-0.251927	-1.55981
DMKJLJHC_00182 Nucleotide-binding protein YvcJ	MGVTRSDPATQQEGQRVVLVSGPSGAGRTTAIGALEDLGYEPIINLPLSLIPRLLSGHIGHPVALGVDVRGRDFSAAALIELIDTLTREPDLNLELLYLDAREDVLVRRYSETRRRHPLSPDAPPGSGIAQEVDILAPIKLRADVLIDTSEMSPHDLRAELGRFFDTGRIERLAVSVHSFSYKRGVPRGIDLMFDCRFLANPHWDPALRPLDGRDAAVATHVESDPRYAEFYAKVMDLLLFLLPAYVAEGKAHLSVGFGCTGGQHRSVMMTETVTKALAEAGWQVSKRHRELE	K06958	rapZ; RNase adapter protein RapZ		21.8202	21.1117	21.287	21.1938	21.5366	21.4994	21.7583	21.5639	21.4948	21.1786	21.3233	21.6183	21.798	21.3874	22.1149	21.4063	21.4099	21.6057	21.3734	21.7668	0.301304	0.153572	0.111534	0.182979	0.2978	0.00313274	0.00344545	0.00401641	0.0033218	0.0125874	0.00367	0.199383	-0.0328767	0.360503					0.98849	0.429695	0.901436	0.295153	0.195713	-0.0365467	0.356833
DMKJLJHC_00185 hypothetical protein	MDEHVEIAAAQAQSKAYDKRRLSYAGTFSNPFKVGTIRALEWVTAKTRLLRLIRKFEKRGAPVGQEFWPQALDIMGIDVTTPPEQIARIPKTGPLVVVANHPHGLVDGMVLAYLIGQVRDDYLILTRSLLTGIPEIEQYMLPVPFPHEANAREDSLKMRAACMAQLRRGGVVVLFPAGQVAHSATLFGPVIEQEWNPFTAKMLARSGASVVPIHFPGCNSRAYQIANRLSATVRQGLLLYEIRRALNKPQHPVIGRAKTAEEIAEPLKNPRKFLADLREETLKL				22.4815	22.4013	22.6181	22.6168	22.5251	23.0037	22.0517	22.502	21.9927	22.7404	22.6184	22.7503	22.2183	22.1055	22.1519	22.5003	22.7152	22.1821	22.703	22.1586	0.0895164	0.207391	0.227478	0.0599968	0.0463102	0.00668732	0.00851462	0.00598932	0.00834891	0.0165149	0.214917	-0.318137	0.202743	-0.341707				+	0.249663	0.139524	0.0563503	0.00868123	-0.533053	-0.0121733	-0.556623
DMKJLJHC_00186 3-hydroxybutyryl-CoA dehydrogenase	MGRLAAYGRVKRKKGQNMAIEKVGIVGAGQMGNGIAHVFALAGFEVLLNDIDGKALDKALATIGKNLDRQVSREKISQADRDAAMARISTTTDLTDLGPTDLVIEAATERETVKQQIFDALLPHLKPETILTSNTSSISITRLASRTDRPEKFMGFHFMNPVPVMQLVELIRGIATDKETYETLLGVVEKLGKTSASAEDFPAFIVNRILMPMINEAVYTLYEGVGNVRSIDESMKLGANHPMGPLELADFIGLDTCLAIMNVLHDGLADTKYRPCPLLTKYVEAGWLGRKSGRGFYDYRGETPVPTR	K00074	paaH; 3-hydroxybutyryl-CoA dehydrogenase [EC:1.1.1.157]		25.5911	25.7634	25.5773	26.0458	26.2399	26.0929	27.2854	27.2703	27.3838	26.5015	26.019	26.1169	22.5303	22.9331	24.3685	25.644	26.1262	27.3131	26.2125	23.2773	0.0846796	0.0826521	0.050318	0.208264	0.788931	0.0591009	0.0905684	0.209878	0.0950795	0.0358636	0.48223	1.6692	0.568537	-2.36664	+	+	+	+	0.00449733	1.79807e-05	0.0232441	0.0134978	1.18697	0.0863067	-2.84887
DMKJLJHC_00188 Electron transfer flavoprotein subunit alpha	MAVLLLGEVNNGELSLDATAKAVSAAKSLGDVTVLCAGASAAAAGEAASKIDGVAKVLVAEDASLGHRLAEPTAALIVSLAGDYSHIVAPATTDAKNVMPRVAALLDVMILSDVSGVVDADTFERPIYAGNAIQTVKSKDEKKVITFRTSTFDAAGDGGAASVETVGAADDAGLSSWVEDKVAESDRPELTSAKIVVSGGRGVGSEEDFKVIEALADKLGAAVGASRAAVDSGFAPNDWQVGQTGKVVAPELYIACGISGAIQHLAGMKDSKVIVAINKDEEAPIFQVADFGLVADLFDAVPELTEKL	K03522	fixB; electron transfer flavoprotein alpha subunit		26.9828	27.0596	26.9499	26.6439	26.658	26.738	27.0849	27.0907	27.2675	26.7735	26.6168	26.7924	26.3851	22.074	25.4212	26.9975	26.68	27.1477	26.7276	24.6268	0.0459522	0.0414515	0.0847405	0.0787088	1.84744	0.151022	0.132948	0.187137	0.135877	0.0913856	-0.317493	0.150237	-0.269873	-2.3707	+		+		0.00191611	0.0922343	0.0138337	0.143843	0.46773	0.04762	-2.0532
DMKJLJHC_00189 Electron transfer flavoprotein subunit beta	MKVLVPVKRVIDYNVKARVKADGSGVDLANVKMSMNPFDEIAVEEAIRLKEKGIVEEIIVVSIGVKQAQETLRTALAMGADRAILVVAADDVHQDIEPLAVAKILAKVVEAEDPKMVILGKQAIDNDMNATGQMLAALLGWGQATFASEVVVEGEAAKVTREVDGGLQTIEVKLPAIVTADLRLNEPRYASLPNIMKAKKKPLEEKTADDFGVDVSPRLEVVSVKEPETRQAGEIVPDVDTLVAKLKEKGVV	K03521	fixA; electron transfer flavoprotein beta subunit		26.8265	26.9597	27.0505	26.7017	26.7953	26.8737	27.3438	27.4536	27.4022	26.7095	26.8538	26.8206	26.7437	23.8466	26.2847	26.9456	26.7902	27.3999	26.7946	25.625	0.0919916	0.0703042	0.0448232	0.0616841	1.2714	0.145687	0.143509	0.222879	0.142338	0.182548	-0.15533	0.45429	-0.150963	-1.32057		+			0.130646	0.0032861	0.126167	0.216764	0.60962	0.00436667	-1.16524
DMKJLJHC_00196 N-acetylmannosamine kinase	MNRATQETGSTGMALPKMGSDHTAMRNHNERLVLSIIRHKGALAKSEIARLTGLSAQTVSVIMRALETEGLLLKCDPVRGKVGQPTVPMRLNPEGGYFLGLKVGRRRSELMLIDFLGQPRASRVARHDYPTPDDTVAFARRAVQEILAEMKPRRRARVFGMGIGAPFQMWDWGTALGLPPTAMSGWRSRDIRAELEAEFPWPVLLENDASAACNAELLHADEELPRHFIYAFLGFFVGGGLVMNASLVTGSRGNAGALASMPVPDGKGGQVQLLDVASLSGLEARLRAQGQDSEFLWESRENWSVPPYILDPWMEGAAKGLAHIAASAGALCDLEAVVIDGWMPDALRARLVAQTRDALAGMNHSGMIAPRVLEGHAGADARAIGAASLPLAARFLTEF…				24.2381	24.5198	24.6076	20.8406	19.9289	20.1065	19.6464	20.7412	20.2159	20.2234	18.799	19.0735	21.9785	21.401	22.1118	24.4552	20.292	20.2012	19.3653	21.8304	0.157609	0.394632	0.447056	0.617049	0.308495	0.0259259	0.00158748	0.0015172	0.000825793	0.0131552	-4.16318	-4.25401	-5.08989	-2.62474	+	+	+	+	0.000157316	0.000221992	0.000349222	0.000429907	-0.0908333	-0.92671	1.53844
DMKJLJHC_00197 Ribose import binding protein RbsB	MKKTLILGATALTMAASGAWAETTACLITKTDTNPFFVKMKEGAQAKAKELGIKLNTYAGKLDGDVESQIAAVESCIAAGAKGILITPSDSRALAPSVTQARKAGALVIALDTPFEPADTADATFATDNFKAGELIGEWAKAKMGDKAADAKIALLDLNPSQVSVDYLRDQGFMKGFGIDIKDPKKIGDEDDSRIVGHDVTNGNEEGGRTAMENLLQKDPGVNLVYTINEPAAAGAYEALKAVGLEKQALIVSVDGGCPGVENVKEGIIGATSMQFPLLMASKGVEAIAAFAKDGTKPTNSEGLDFFNTGVELVTDQPVDGIESITSEEGLKRCWG	K10552	frcB; fructose transport system substrate-binding protein		31.5712	31.5815	31.7119	28.8539	28.9803	28.9766	28.4326	28.739	28.4984	29.2793	29.1108	29.1601	28.6989	28.4603	28.2198	31.6215	28.9369	28.5567	29.1834	28.4597	0.0640585	0.058763	0.131719	0.0707262	0.195588	3.72415	0.635474	0.496934	0.745445	1.30228	-2.6846	-3.06488	-2.43815	-3.16185	+	+	+	+	1.64325e-06	7.76485e-06	3.50153e-06	2.65517e-05	-0.38028	0.24645	-0.477247
DMKJLJHC_00198 D-allose transport system permease protein AlsC	MTQTEPGGQSFERDLDKSDKSVAAFEARKRGPLGTIQHVLHGNPTMVPVIVLLISVAVFGLIAGGKFFSAFNLTLIMQQVSIIGILAAAQSLIILTAGIDLSVAAIMVLMSVIAGNLAVYHGVPAPLALLVAFVGGACAGLMNGFLVTKVKLPPFITTLGTWSIFFALNLWLSGAQSIRSQDIDSNAALLKFFGNTITVGNARLTYGSVLMVLVFLVLWYMLNKTAWGRHVYAVGDDKEAAELAGIRTDRTLLSIYALAGLVCAIAAWASIGRVGSISPQAFYEANLHSITAVVIGGISLFGGRGSIMGALFGALIVGVFQSGLRLADVDVLWQVFAIGWLIIIAVAIDQWIRKVSA	K10553	frcC; fructose transport system permease protein		27.4096	27.1753	27.0938	23.3839	23.6013	23.5957	22.5779	21.8887	22.1422	23.6154	23.8484	23.7133	23.5648	23.6259	22.1977	27.2262	23.527	22.2029	23.7257	23.1294	0.133859	0.101187	0.284601	0.0955435	0.659326	0.176971	0.0149463	0.00607622	0.0169627	0.0323699	-3.69925	-5.02329	-3.50049	-4.09676	+	+	+	+	6.30718e-06	2.27517e-05	7.25466e-06	0.000999416	-1.32404	0.198757	-0.397513
DMKJLJHC_00199 Ribose import ATP-binding protein RbsA	MDQKGVGMKREPILTARGLVKRYGRVTALDHCDFDLYPGEILAVIGDNGAGKSSLIKALSGAVQIDEGEIRLNDKPVHFKSPLEAQDAGIATVYQTLALSPALSIVDNMFVGRELRKPGVAGKWLRMLDKPAMRSFAREKLNDLGLMTIQNIDQPVETLSGGQRQGVAVARAAAFGSKVIIMDEPTAALGVKESRQVLKLIQELKSNGVPIILISHNMPHVFEVADRIHVHRLGKRLCVIDPKKHSMSDAVAYMTGAKLPDDLGEAA	K10554	frcA; fructose transport system ATP-binding protein		27.6861	27.6227	27.7628	24.5999	24.725	24.7469	23.992	24.3133	24.313	24.7538	24.8028	24.7157	22.6817	21.3671	21.4897	27.6906	24.6906	24.2061	24.7574	21.8462	0.0572654	0.0647705	0.151375	0.0356566	0.592917	0.244165	0.0334837	0.024359	0.034679	0.0132996	-2.99993	-3.48443	-2.93314	-5.84438	+	+	+	+	1.03185e-06	6.93173e-06	4.18942e-07	0.000156418	-0.484507	0.0667867	-2.84445
DMKJLJHC_00200 Crotonyl-CoA reductase	MALDHNTGIAPYDAPEKELYEIGEMPPLGYVPPKMYAWAIRRERHGEPEQSFEVEVVDTWEIDSQEVLVLVMAAGVNYNGVWAGLGVPISPFDGHKQPYHIAGSDASGIVWKVGDKVTRWKVGDEVVIHCNQDDGDDEECNGGDPMFSPSQRIWGYETPDGSFAQFTRVQAQQLMPRPKHLTWEESACYTLTLATAYRMLFGHHPHELKPGQNVLVWGASGGLGSYAIQLANTAGANAIGVISDESKRQFVMDQGAKGVINRKDFNCWGQLPTVNTPEYNEWLKEARKFGKAIWEITGKGVSVDMVFEHPGEATFPVSTLVVKKGGIVVICAGTSGFNCTFDVRYMWMHQKRLQGSHFANLKQASSANRLMVERRLDPCMSEVFPWAEIPQAHTMMLRN…	K14446	ccr; crotonyl-CoA carboxylase/reductase [EC:1.3.1.85]		23.6161	23.5513	23.4086	22.1403	21.8919	23.8087	21.5794	22.3583	21.2909	24.0474	22.6959	23.1142	24.9746	22.377	21.8879	23.5253	22.6136	21.7429	23.2858	23.0798	0.0866641	0.851104	0.450824	0.564903	1.35457	0.0136089	0.00793595	0.00441717	0.0125047	0.0312757	-0.911677	-1.78246	-0.239503	-0.445487		+			0.20627	0.00535985	0.585294	0.666673	-0.870783	0.672173	0.46619
DMKJLJHC_00201 Methylmalonyl-CoA mutase large subunit	MTQDATPAKDRPWLFRTYAGHSTAKASNALYRANLARGQTGLSVAFDLPTQTGYDSDHILSRGEVGKVGVPVCHLGDMRALFDEIPLDQMNTSMTINATAPWLLSLYIAVAEEQGADVRALQGTVQNDLVKEYLSRGTYICPPKPSLAMITDVAAYTREHLPKWNPMNVCSYHLQEAGATPEQELSFALATAIAVLDDLKGKVPPEAFPAMVGRISFFVNAGIRFVTELCKMRAFTELWDEITAERYGIEDAKYRRFRYGVQVNSLGLTEQQPENNVYRILIEMLAVTLSKNARARAVQLPAWNEALGLPRPWDQQWSLRMQQIMAYETDLLEFDDLFECNPAVTAKVEALKAGARAELEALEGMGGAIAAIDYMKARLVDSNAARLGRIEAEQTVVVG…	K14447	ecm; ethylmalonyl-CoA mutase [EC:5.4.99.63]		21.4387	21.6301	21.799	20.5766	18.9121	20.4353	20.0397	20.1617	20.4176	19.7733	18.8567	20.6421	22.1517	22.2032	22.0777	21.6226	19.9747	20.2063	19.7574	22.1442	0.147154	0.753575	0.15749	0.728949	0.051517	0.00363948	0.00127404	0.00152265	0.00108368	0.0163513	-1.64792	-1.41625	-1.86521	0.521623	+	+	+	+	0.0385807	0.000746164	0.0238608	0.00909434	0.231667	-0.217297	2.16954
DMKJLJHC_00202 ATP-dependent RecD-like DNA helicase	MTHSAIQFSDDQAEAWDAVAAALEEAGVDILEGHLQPEGGGSRVLSVIGKAGSGKTLLLAELYKALEAAGLDLVSGDFEGKRKRERRTLAILAPTNKAASVLRNRGVPATTIHRILYTPVYDPEYEQIAEWLTGQGSRPDITQLQITGLTEEALDRAKAFYDLQKSIPGALASAGLRGSDFIRGWKRREDPLDIGFVDEASMLDERQFDDLKEIFPTLVLFGDPAQLAPVNQSGEMVFERLPDKSKHVLHRIHRQAEDNPILDLAHMLGDESVGFEAFERAVQEAAARDDRVVWAERVECDLMARSPVLVWRNATRIRLIHAFRTAHSAPSDMMLPGEPLICDGIELPAKHRKKRIDLEARGLIKGAQVVYLGPGKKPGFSRLHVMGAEDPRLSAASIV…			K01144	21.9255	22.1062	21.5098	21.7813	21.1525	21.632	21.2487	21.5926	21.5013	21.4523	21.7243	21.8402	21.8392	21.7861	21.9738	21.8472	21.5219	21.4476	21.6723	21.8664	0.24968	0.268255	0.145469	0.162569	0.0789913	0.00425256	0.00372349	0.00359954	0.00408647	0.0134869	-0.325273	-0.399617	-0.174893	0.0191833					0.277724	0.122149	0.453125	0.922476	-0.0743433	0.15038	0.344457
DMKJLJHC_00205 Purine nucleoside phosphorylase 1	MSKSAELADLIRAKAGAEPPALGLILGSGLGHLAEEVEGVAIPYSDLPGFPHAGVSGHNPKLVIGTLEGVRVAVFGGRVHYYEHGNPAEMRLPLEILRELGCEQLLLTNAAGSLREDIAPGGLMMLSDHINFSGNNPLIGEPSDARFVPLTEAHDPQIRAGLAAAAKAEGIELPEGVYCWFSGPCFETPAEIRAARIFGADAVGMSTVPEVILARFLGLRVAAVSVITNMGAGMADEQISHEQTKAIAPMGAAKLERVLRRYLQQL	K03783	punA; purine-nucleoside phosphorylase [EC:2.4.2.1]		20.8971	21.0516	20.7773	21.4699	21.0863	21.3534	20.9367	19.7	20.9654	21.5233	21.6871	21.2304	21.664	21.2297	22.3804	20.9087	21.3032	20.534	21.4803	21.758	0.112294	0.160542	0.589873	0.188914	0.474467	0.0022189	0.00319976	0.00191095	0.00357722	0.0125115	0.394517	-0.37466	0.571573	0.849353	+		+		0.0465	0.427401	0.0212398	0.0694256	-0.769177	0.177057	0.454837
DMKJLJHC_00207 hypothetical protein	MEKTPKWIDVALIPLLNLLIAFVISGIVVLLIGENPIEAIRVMVDGSLGSPYGWGYTLYYATNFIFTGLAVAVAYHASQFNIGGEGQATLGGLGVALVLLMVPWPNWYLALIGAMIGGAVFGAAWAAIPAYLQAKRGSHIVITTIMFNFIAASLLNYMLVNVLRPRGSMDPATARFPATTHLPTFHDMPLIGQFFGKSVPANVSFFIAILACFLVWGLIWRTRLGFAIRAFGRSEPAARYAGISPVKIVMAAMLISGALAGLMATNNVMGEAHRLVLNSVEGAGFIGIAVALMGRNHPFGVFLAALLFGFLYQGGGELALETSIPRELITVIQALVILFTGAFDNMLRGPIEQFFVARAKARKEA	K02057	ABC.SS.P; simple sugar transport system permease protein		20.5402	19.2757	20.5821	19.3417	20.4249	21.4384	19.9325	20.153	19.951	20.2738	20.0258	20.0295	21.5779	21.7624	22.7234	20.1327	20.4017	20.0122	20.1097	22.0212	0.606208	0.856132	0.0998878	0.116048	0.50221	0.00129578	0.00171285	0.00133092	0.00138343	0.0150155	0.268983	-0.120497	-0.02299	1.88858				+	0.735235	0.795245	0.960515	0.0274588	-0.38948	-0.291973	1.6196
DMKJLJHC_00208 Galactose/methyl galactoside import ATP-binding protein MglA	MQADQNTTKAGRQATAAPAAKSVATPTGAPAIELKGISKAFGTVQANKDISIRVMPGTIHGIIGENGAGKSTLMSILYGFYKADAGEIWIKGKHTQIPDSQAAISAGIGMVFQHFKLVQNFTVLENIILGAEDGALLRPSLNKARRELKRLAEEYELNVDPDEKIEELSVGHQQRVEILKALYRQADILILDEPTGVLTPDEADHLFRILNHLKDEGKTIILITHKLREIMETTDTVSVMRRGEMTATVSTSETSPEHLAELMVGRKVLLNVAKTKANPGKTVLEIENLKVRDEDGVERLRGINLQIRAGEILGIAGVSGNGQSELLEVLGGFANGTGTIRLNGEELDLTGKHSDGQSRRAKGIAHVPEDRHHLGLILDFAAWENMVFGYHSDPAYQKN…	K02056	ABC.SS.A; simple sugar transport system ATP-binding protein [EC:3.6.3.17]		23.5605	23.6273	23.5423	24.0099	24.2478	24.322	23.5765	23.6804	23.6507	24.117	23.8763	24.3298	21.6896	21.9689	22.0613	23.5767	24.1932	23.6359	24.1077	21.9066	0.0365767	0.133127	0.0437014	0.185238	0.157997	0.0141022	0.0237195	0.0164055	0.0221048	0.0138685	0.616557	0.0591633	0.531027	-1.67008	+		+	+	0.00321491	0.215969	0.0164371	0.000129288	-0.557393	-0.08553	-2.28664
DMKJLJHC_00209 Membrane lipoprotein TmpC	MTLFKQFLGAAATLALSAGAALAEPAVIYDLGGKYDKSFNEAAYNGAKRWAEETGGKYKELEMQSEAQREQALRKLAESGANPIVMTGFAFGDTLNQVAPDYPDTKFAIIDMVVDQPNVESIVFKEEQGSYLVGLMAGMASKTGTVGFVGGMDIPLIRKFACGYVQGVKAANPDAKVIENMTGTTPAAWNDPVKGGEIAKAQISQGADVIYAAAGGTGIGVLQAATDGGALGIGVDSNQNYLHPGKILTSMLKRVDTAVYNAFQAGPNLKPGIKVMGLSDDGVGVALDDNNKSLVTPAMLKAVDQAKADIISGKIKVHDYMSDDSCPVE	K07335	bmpA; basic membrane protein A and related proteins		26.318	26.2934	26.4202	26.5434	26.6885	26.557	25.5857	25.9373	25.7537	26.6391	26.9722	26.6931	25.8507	21.4365	24.3828	26.3439	26.5963	25.7589	26.7681	23.89	0.0549038	0.0654292	0.143587	0.145995	1.83547	0.0960034	0.125454	0.071463	0.139751	0.0548389	0.252403	-0.58499	0.424283	-2.45386	+	+	+		0.0139282	0.00576222	0.0183514	0.131776	-0.837393	0.17188	-2.70627
DMKJLJHC_00213 hypothetical protein	MRKFLVVLDDTRECLNAMRFAAMRASHTGGGVMILSVIPPDEYQHWIGVAEIMRDEARERIEAHFEVFAKWMRDRQGVEPELLIREGEPATEILNVIQEHTDIGVLVLGAGTGKGGPGPLVSQMTKQAGSLPCPLTVVPGEMSKEKLEQIT				21.8709	21.9813	21.7908	21.1016	21.4974	21.6578	21.5174	20.0599	21.6016	20.2402	22.0752	22.043	21.5095	22.1805	21.9318	21.881	21.4189	21.0597	21.4528	21.8739	0.0781216	0.233764	0.707786	0.857527	0.276941	0.0043535	0.00346696	0.0027509	0.00350969	0.0135578	-0.4621	-0.82137	-0.428247	-0.0071					0.0568959	0.178171	0.520625	0.973836	-0.35927	0.0338533	0.455
DMKJLJHC_00214 Branched-chain-amino-acid aminotransferase	MAFGTNIRTWFEGEWHEGDIPVMRAADHGLWQGSSVFDGARLFDGLVPDLDLHCARVNRSADALMITPTLEPQTIVEIAREGLRKYPKGAAVYVRPMYWAVAGSDLGVAPMRGETRFALCLEEVAMPDPEAATTLTTTQFRRPVLADNVCNAKAGCLYPNNARMLVEAQAKGFGNALVQDAQGNVAESATANIFMARDGEIFTPIANGTFLAGITRARHIANLRSAGFKVHEAVLTLADFHAADEVFLSGNFAKVTPVAAFEDTRFEIGPITRAARESYWDWALGAPL	K00826	E2.6.1.42; branched-chain amino acid aminotransferase [EC:2.6.1.42]		24.2224	24.2966	24.4396	24.4518	24.4122	24.2996	24.6874	24.8896	24.7286	24.295	24.4762	24.2426	21.36	20.6553	21.0863	24.3195	24.3878	24.7685	24.338	21.0339	0.0901066	0.0644824	0.08725	0.100085	0.290068	0.0235996	0.0271446	0.035971	0.0259298	0.00757362	0.0683067	0.44897	0.01843	-3.28569		+		+	0.432508	0.00716922	0.855968	0.000106495	0.380663	-0.0498767	-3.35399
DMKJLJHC_00215 hypothetical protein	MPSPSLSSSHPRLLIVGGSGRLGRLIAAAWARAPEGPPVTPIWQARRDLGLGGPIFDPLGAPEAFARACAESDAVLFLAGRINGPSAALEINVALARAARAQALRAGVPLIMASSAAVYGRGAGLLSETAPCAPRNDYGRSKLAVEAVLEGMARGCALRIGNVAGADALLGAPAPPEGRKLHVFADGSAPRRSYIGPSALADAVAHLACLAVAQPETLPACLNLAQPGAVGMDELLSAAGESWSAQPAPPTAIAHVELDVTRAVNLGLVAPAPLDAQAMVEDMQRVKQEFQ				21.4554	21.1998	21.0486	20.8495	21.3684	21.3228	21.0035	21.6463	21.5552	21.0249	21.1948	21.1493	21.9568	21.6451	21.9541	21.2346	21.1802	21.4016	21.123	21.852	0.167904	0.234607	0.284003	0.0718109	0.146333	0.00278128	0.00293831	0.00348679	0.00279257	0.0133533	-0.05436	0.16705	-0.111573	0.617393				+	0.80305	0.513535	0.436299	0.0172441	0.22141	-0.0572133	0.671753
DMKJLJHC_00218 tRNA pseudouridine synthase A	MPRYAFQIEYDGGPFSGWQRQTDHPSVQGAIEAALARLEPGPHTIAAAGRTDAGVHATAQVAHVDLQKSWDPFRLTEAINHHLRPHPVAILACAEVPENFHARFSAGERRYLFRLVQRRAPMTFSRGQVWQVRNPLDIDAMRAGAAHLIGHHDFTTFRSTLCQAKSPVKTLDEITISEQEIPGGVEYHFRLRARSFLHNQVRSIVGTLERVGAGSWSPERVGSALEARDRAACGPVCPPQGLYLAGVGYPEDPFA	K06173	truA; tRNA pseudouridine38-40 synthase [EC:5.4.99.12]		21.2866	21.0455	21.2202	20.921	19.8188	19.0592	20.7675	20.8551	20.7833	20.9769	20.5274	20.8541	21.2969	22.8216	22.258	21.1841	19.933	20.802	20.7861	22.1255	0.101714	0.764337	0.0381002	0.189725	0.629464	0.00268564	0.0012378	0.00230093	0.00221099	0.0161411	-1.25109	-0.38215	-0.397987	0.941427		+			0.0834341	0.00762049	0.0591356	0.105066	0.868937	0.8531	2.19251
DMKJLJHC_00219 hypothetical protein	MGISNIADGITRRFEGLGSQVSETFFEPVIRVGVTGLSRAGKTVFITSLVANLLDRGRMPALSAASDITAAFLQPQPDDTVPRFDYESHLAALTGPEPHWPEGTRAVSELRLSFRIQSRGILGAVRGPRVVHLDIVDYPGEWLLDLGLMEKTYAQWSDEVLARLPNRPEGPGYLEMAEACDGTADFTEPQAKALAARFTAYLTAAREAGFSDCTPGRFLLPGEMAGSPALTFAPLPAGEAPRRSLRREMERRFDAYKREVVKPFFRDHFAKIDRQVVLVDVLGAIHAGPAALEDLRGAMADILSAFRPGRARWLTSLLGAHRVERILFAATKADHLHHSQHARLTAITGALLREARDRADFAGAKTQALSIAALRTTTEEVITHEGAELNAVRGRLASG…	K06918	uncharacterized protein		23.2954	23.4896	23.418	23.3794	23.5603	23.6106	23.2235	23.3211	23.4085	23.4042	23.5064	23.4463	21.6524	21.9413	21.1111	23.401	23.5168	23.3177	23.4523	21.5683	0.0801688	0.0992968	0.0755609	0.041941	0.3441	0.0124854	0.0148414	0.0131587	0.0140342	0.0109694	0.11578	-0.0833267	0.0512833	-1.83274				+	0.268784	0.345019	0.467704	0.0018381	-0.199107	-0.0644967	-1.94852
DMKJLJHC_00221 Phosphoribosylamine--glycine ligase	MNILVLGSGGREHALAWAIKQNPKCDRLIVAPGNAGIARIADCAVIDPNDSAAVLELCAANAVDFVVIGPEAPLAAGVADALREQGYLTFGPSAEAARLEASKAFTKEICDACGAPTAAYARFTDAEAAKAYVTAQGAPIVIKADGLAAGKGVIVAMTLQEALEGIDEIFGGAFGDAGAEVVIEEFMEGEEASLFILCDGENILNIGGAQDHKRVGEGDTGPNTGGMGAYSPAPVLTPEIEAKALAEIVRPTVAEMAKRGTPFQGVLYTGLMIKDGQPRLVEYNVRFGDPECQVLMLRLGAQVLDLLLACAEGRLGEMRAQWAPDHAMTVVMAAKGYPGAYKKGSVIAGLDAISQDSHQMVFHAGTASRDGTIVASGGRVLNVTARGASLAEARARAYA…	K01945	purD; phosphoribosylamine---glycine ligase [EC:6.3.4.13]		24.9621	24.8268	24.6176	23.5203	23.7499	23.8256	23.8629	23.9263	23.6182	23.8956	23.9339	23.8424	21.9368	21.6139	21.392	24.8022	23.6986	23.8025	23.8906	21.6476	0.141717	0.129837	0.132856	0.0375233	0.223679	0.0329756	0.0168344	0.0184138	0.0190169	0.0115892	-1.10358	-0.999713	-0.911537	-3.1546	+	+	+	+	0.00125087	0.00189362	0.000922549	7.27475e-05	0.10387	0.192047	-2.05101
DMKJLJHC_00222 Exodeoxyribonuclease 7 large subunit	MDLLDDESGSNAHDYTVSEISGAVKRVIEGEFGRVRVRGEVGRVSMPRSGHMYFDLKDDRSVIAAVSWKGQVARMEVRPEEGMEVIATGKLTTFPGQSKYQLIVDTVEPAGAGALMAMLEARRRALAAEGLFDPAHKRPIPWLPNVIGVVTSPSGAVIRDILHRLRDRFPRHVLIWPVAVQGQACAPDVARAIRGFNAIAPGGPVPRPDLIIVARGGGSIEDLWGFNEEAVVRAAFESEIPLISAVGHETDTTLIDHASDRRAPTPTAAAEMAVPVRAELASWLSEAQARMGRAARGRLEHRGQRLHDLSRGLGRPEALTQSARQSYDIWAERLKPALRTLVLRKNTRFAPLSARIEPRLLRQFMGNETQRLSGLAARLRPAPGTRLRRGQEQLDMLER…	K03601	xseA; exodeoxyribonuclease VII large subunit [EC:3.1.11.6]		23.2691	23.2069	23.1627	22.7269	22.7245	22.448	22.2638	22.4577	22.2078	22.5865	22.7154	22.8895	21.1362	21.9882	21.415	23.2129	22.6331	22.3097	22.7304	21.5131	0.0436538	0.130929	0.107061	0.124164	0.354682	0.0109592	0.00804392	0.00654319	0.00850917	0.0105581	-0.579773	-0.90318	-0.482473	-1.69978	+	+	+	+	0.00402604	0.000381726	0.00658711	0.00254399	-0.323407	0.0973	-1.12001
DMKJLJHC_00225 Signal recognition particle receptor FtsY	MSFFNKLKSRLTRSSSKLEKGLEDIVAENAAEPEASETPEPEAAPEPQTRSEPEQSEPPASEPVSLPDPTFPAPGYVPAPVTEPVEQENAQPAKAPLDIQPALPKADPVPRKPGLLGRMFGAEPKVVEPRRVLDDEMLESLEELLIASDMGVDTALRVSANLAEGRMGRRLSVTEIKELLAQEIARIMEPVAKPLPLFPKKPQVVLVVGVNGSGKTTTIGKLASQFRAAGKQVVIAAGDTFRAAAVEQLQVWGERAGVPVLTAPEGSDPASLAFDAMKKAEEDGADLLMIDTAGRLQNRADLMEELAKIVRVIRKRDPDAPHNTLLVLDATTGQNALQQVDVFRKISDVSGLVMTKLDGTAKGGVLVALADRFGLPIHAIGVGEQLDDLAPFDPEEFAQ…	K03110	ftsY; fused signal recognition particle receptor		24.5819	24.6461	24.5468	24.0206	23.9587	23.8613	24.3309	24.141	24.2461	23.9065	23.892	23.9875	22.0036	22.0579	21.863	24.5916	23.9469	24.2394	23.9286	21.9748	0.0411269	0.0655993	0.0776817	0.04201	0.0821414	0.0284978	0.0199959	0.0249266	0.0195245	0.0145399	-0.64475	-0.352267	-0.662987	-2.61681	+	+	+	+	0.000297486	0.00477911	9.03623e-05	2.26862e-06	0.292483	-0.0182367	-1.97206
DMKJLJHC_00234 Ribosomal protein L11 methyltransferase	MTTFTAFTTLADRDAAEALEERLEDLEPAPYGTGVFEIEDGSGRYEVSGYFLEEPDDVVLTLLAVAHGAQPFVISEIPETDWVAHVRRELAPVRAGRFFLYGSHDADKIPEDAVALRIDAAMAFGTGHHGTTSGCLSALDALASEGYHFHNSVDIGCGTAVLAMAAAKLWPEPVLASDIDPVAVETANANVALNDLAGRVSCVEAAGFHHPALEAAAPFDLIFANILKAPLIALAPDMAKNCSESGVVILSGLLNEQAEDVIAAYKAQGFVSKARKEFGEWTTLVMSRS	K02687	prmA; ribosomal protein L11 methyltransferase [EC:2.1.1.-]		23.0068	22.9723	23.2272	22.2785	22.3442	21.7936	22.4998	22.6543	22.7037	22.5585	22.8947	22.4174	21.326	21.3136	21.7959	23.0688	22.1388	22.6193	22.6235	21.4785	0.1129	0.245515	0.0868583	0.200233	0.224468	0.00991705	0.00571015	0.00810908	0.00790124	0.0103074	-0.92998	-0.449473	-0.44525	-1.59027	+	+		+	0.00823789	0.0111396	0.0519434	0.000861806	0.480507	0.48473	-0.660293
DMKJLJHC_00237 hypothetical protein	MRQIFIAATLLAGTALPLHAQDTHYPLTLTNCGYEISFDAAPDSAVTIGQSATEILYSLGLAPKVSGTSVWFNPVLPEFAEVNAGIERLADNDPSFESVVAKKPGLVAVQYEWHVGPDGSVGTREMFHDIGIPTYILPADCDTKDNSTGGDGTRTGAFETASVYKGIRELAEIFDVQAKGAALVSDLQATEARAIARAKALDLPKDLSAVFWFSSPELQTDPYVAGRLGAPGYMMSKLGIENVIKSDEEWPTVGWESIARADPDVIVIAYMDRRRYPADDVDKKLEFLRSDPVASQMTAVREGRIVQMDAHAMSATMRSIYGLETLSDALSKMSFQ	K02016	ABC.FEV.S; iron complex transport system substrate-binding protein		23.8047	23.6799	24.3448	25.4358	25.5408	25.4725	25.6179	26.0472	25.9695	25.3069	25.2998	25.4166	25.5244	22.3401	25.1405	23.9431	25.483	25.8782	25.3411	24.335	0.288532	0.0435168	0.186795	0.0534818	1.4193	0.01818	0.057992	0.0776269	0.0519728	0.0746532	1.53991	1.93511	1.39799	0.391877	+	+	+		0.00172248	0.00134816	0.00252903	0.721446	0.3952	-0.141917	-1.14803
DMKJLJHC_00240 Primosomal protein N	MSEPGWFEEGARLSVLTAEPIGKPLDYRAPEGGCWEGAFVEVPLGPRRVLGVVWGPGDGDFDMAKLRAANRVFDVAPMRTELRDFLVKMADYTMTPLPQVLRLATRAPGLGDPPGMRKIYRLGDHEPARMTDARARVLEVLEAHGGAGYHLGELAQLAGVTTQVVKGLVKSGAVIEAEVPRDLPFARLDPDRPGKALSQAQAQAAQALRASAGGYSTTLLKGVTGSGKTEVYLEAVAQCLAQGRQALVLLPEIALSSEFLARVEARFGAQPGEWHSGVTQSERRRLWKACGSGEVQLVVGARSALFLPFRDLGLIVVDEEHDSSYKQEEGVLYNARDMAVLRAAQAGSQVVLASATPSLESWANAQAGKYQRLDLGARFGTAEMPDMGTIDMRDEALEA…	K04066	priA; primosomal protein N' (replication factor Y) (superfamily II helicase) [EC:3.6.4.-]		20.771	21.1914	21.0105	20.717	19.4664	20.5624	20.944	20.2314	20.7143	20.1252	21.3067	20.9998	20.5979	20.9662	20.679	20.991	20.2486	20.6299	20.8106	20.7477	0.172204	0.556697	0.296991	0.500585	0.158008	0.00234912	0.00154042	0.00204227	0.00224876	0.00621096	-0.742393	-0.361047	-0.180407	-0.24328					0.145946	0.211145	0.655024	0.214968	0.381347	0.561987	0.499113
DMKJLJHC_00241 Transaldolase	MKFFVDTADTAAIKELNDLGMVDGVTTNPSLILKSGRDILEVTKEICDMVAGPVSAEVVATEAKQMIEEGNKLAKIAPNITIKVPLTWDGLTACKAFASEGHMVNVTLCFSAAQALIAAKAGATFISPFIGRLDDINLDGMQLIEDIRTIYDNYDYKTEILAASIRSVNHITDAARIGADVITAPPNVIKAMANHPLTDKGLAQFLKDWDATGQKIV	K00616	E2.2.1.2; transaldolase [EC:2.2.1.2]		27.4267	27.5018	27.6909	27.158	27.1256	27.2	27.2568	27.4306	27.301	27.4347	27.0336	27.1948	26.5534	24.4744	25.9722	27.5398	27.1612	27.3295	27.221	25.6667	0.111165	0.03046	0.0737593	0.164788	0.87583	0.219939	0.18559	0.212265	0.191287	0.187897	-0.378587	-0.21034	-0.318783	-1.87314	+			+	0.00969712	0.0896386	0.0859173	0.0399217	0.168247	0.0598033	-1.49456
DMKJLJHC_00247 Isoleucine--tRNA ligase	MSSDKTSTTTAPDYRGTVFLPQTDFPMRAGLPAREPEWLERWEKIGIYDRLREKAATGSRSPFTLHDGPPYANGHLHIGHALNKTIKDMIVRSHQMMGRDARYVPGWDCHGLPIEWKIEEQYRKKGLDKDAVDIVDFRQECRKFAEGWVDIQREEFKRLGITGNWDDPYLTMNFHAEAVIAEEFMKFLMNGTLYQGSKPVMWSPVEKTALAEAEVEYHDHTSHTIWVRFKVRRGGNAQMPTEDAAEYDDADQALLADQLHDATVVIWTTTPWTIPQNRAVSFNPKISYGLYRVDALAEGSTATEGETLLLADALAEAVMDQAKVAEHSRLRDVSSWELEGLTLAHPYAGIEGAQGEWDYDVPMLPGDHVTDEAGTGFVHTAPSHGDDDYQMGLKFGLQM…	K01870	IARS; isoleucyl-tRNA synthetase [EC:6.1.1.5]		26.3255	26.3667	26.3769	25.8732	25.8199	25.6471	26.1442	26.2361	26.2871	25.8767	25.9761	26.104	22.355	21.4214	21.8792	26.3563	25.7801	26.2225	25.9856	21.8852	0.0222074	0.0965017	0.0591335	0.0930348	0.381168	0.096838	0.0712507	0.0985473	0.0812426	0.0136642	-0.576267	-0.133857	-0.370753	-4.47115	+	+	+	+	0.00118844	0.0400643	0.00539228	7.78646e-05	0.44241	0.205513	-3.89488
DMKJLJHC_00248 hypothetical protein	MSDQAQISDKDVQALFTRASGDYLFARWGRPIVPVVFGVEAGTLATVKGAVEAVAALSGHKLAETDPELGANLMIFFFRDWQELLEVPNLDQLVEGLHDLVMRLDGQDATQYRVFRFDAEGAIRACFAFVRMSAALDEVPAEVIALQQAVQSIVLWSDTAFTERSPLANVQGVTVLRPDIAAVIAAGYEPTLPAVARDPAHALRLAARANLRQQEAERAVQALSREVGEAGHEDEEAGPDGA				21.6936	21.922	22.3067	21.5154	20.9766	21.8173	21.7349	22.338	21.5053	21.6749	21.4457	21.4106	22.884	21.7926	21.7535	21.9741	21.4364	21.8594	21.5104	22.1434	0.252983	0.347715	0.351171	0.117216	0.523958	0.00464362	0.00350925	0.00478872	0.00365277	0.016342	-0.537687	-0.11471	-0.463677	0.16928					0.151731	0.726821	0.0783578	0.701831	0.422977	0.07401	0.706967
DMKJLJHC_00250 Biopolymer transport protein ExbB	MDHSSLAMAQEIDFSLLALFVRASFIVKLVMIILVVASFWSWAIIIRKFIAYRAAKTEAEQFDRAFWSGEPLDELFDQIGPTPSGASQKIFAAGMMEWRRSHRQDGALIAGAQARIERSMDVAILKATEGLNYGLNFLATVGSISPFVGLFGTVWGIKVAFEEIAISQNSSLAVVAPGISEALVATALGLLAAIPAVIFYNKLSSDADRIASNYEAFADEFTTILSRQLDG	K03562	tolQ; biopolymer transport protein TolQ		24.2784	24.2208	24.2764	24.5999	24.7651	24.5929	24.6655	24.4901	24.4617	24.5293	24.4772	24.2954	22.6855	22.3226	22.5893	24.2586	24.6526	24.5391	24.434	22.5325	0.0267017	0.0795559	0.0901401	0.100294	0.153503	0.0226228	0.0326132	0.0306827	0.0277142	0.0214008	0.39408	0.280547	0.175427	-1.72609	+	+		+	0.00266815	0.013475	0.0751381	9.69383e-05	-0.113533	-0.218653	-2.12017
DMKJLJHC_00252 hypothetical protein	MNRPEKIGFYASGALHLAVIVLAITGTEWLRPTPQTPEVISQVAVMSEQDFNAMMASAPKDAPQPTPDPKAPIAPTPPNESAPPETPAPEAQAQPEPKPDALADPAAQADAKPDVSNIQEPPAQADVSDTPPVMAPPVEVPSDTVSPEISPQPKPKQVPRVAPTPAPEPPPDAKVSETAKPAETPKPEATPQPVPDKPKQAEAPPEATSEIATEANKTDTPETSAPQASPRPASKPKPPAPKVAQPDTPAPDKPDTPKTDTAAADTPKPQPPAPKEPTKPDSQKAVTDALAAALGGAGTGGTGSAPTGPPITAGEKDALIVDVKRCWNVGALSSDALRTTVTLSVQMQPDGHPIISSIKLVGSSGGSGSAVDQAFEAGKRAIVRCGADGFPLPPEKYAR…			K03646	21.1963	21.2142	21.0209	20.7534	20.8819	20.8388	20.7884	20.8778	20.7405	21.0638	21.0117	20.6225	22.045	20.7896	22.573	21.1438	20.8247	20.8022	20.8993	21.8025	0.0872477	0.0533811	0.0569294	0.196914	0.747974	0.00261166	0.00229656	0.00230136	0.00239147	0.0129034	-0.31909	-0.341583	-0.244487	0.65873	+	+			0.0115834	0.00975611	0.183687	0.283717	-0.0224933	0.0746033	0.97782
DMKJLJHC_00253 Dipeptidyl-peptidase 5	MKRFVLAMMMALLAGPMAAFAQSQEPLHITITDGVIEPLPFAMAGFLPESPDAAQMAQQISKVISDDLTGTGLFREIPKSAYVQKIDTFDTPVNYSDWQAINAQALVVGSVGMSGGKLVVKFRLFDVFSGQQMGDGQQLAASPASWRRLAHKVSDVIYSRITGEGPYFDSRVVFVSESGPKNDRQKRLAIMDYDGANVSYLTDASTIVLAPRFSRDGNKVLYTTFETGFPRIKMLDVATASARLLPDVPGTMTFAPRFSPDGSKIVYSLEQNGNTDLWLMDVASGETQRLTTSPSIETSPSFSPDGKQIVFESDRSGTQQLYIMSASGGDATRISFGDGRYSTPVWSPRGDMIAFTKQNAGRFHIGVMRTDGSEERLLTSSFLDEGPTWSPNGRVIMFT…	K03641	tolB; TolB protein		25.4625	25.5138	25.4708	25.6428	25.564	25.5581	25.6799	25.7772	25.6341	25.6323	25.7513	25.5827	26.025	20.6921	25.2039	25.4824	25.5883	25.6971	25.6554	23.9737	0.0224851	0.0386292	0.0596627	0.0707306	2.3445	0.0528385	0.0623825	0.0684658	0.0646246	0.058113	0.105953	0.214693	0.173077	-1.50871	+	+	+		0.0285056	0.00889194	0.0299916	0.414289	0.10874	0.0671233	-1.61466
DMKJLJHC_00254 Outer membrane lipoprotein Omp16	MKFAAKAALVVAILGLAACSNPDKYGSGAVGPGGTLGPGGAGMNGGMGGVNDPNSPAYFSQTIGDMVHFQVDQSTLTDTARGILTQQASWLVSHPSYTAIIEGHADEQGTREYNLALGARRANAAQEFLISQGVAANRLRTVSYGKERPLAVCSSEECYAKNRRAVTVISQSAVGS	K03640	pal; peptidoglycan-associated lipoprotein		25.4888	25.3407	25.2212	25.1033	25.4771	25.5121	25.0688	25.0301	25.319	25.2745	25.0714	25.1209	22.6977	21.1995	22.7355	25.3502	25.3642	25.1393	25.1556	22.2109	0.109471	0.185035	0.12806	0.0864544	0.715353	0.0482135	0.0534052	0.046513	0.0457017	0.017125	0.0139467	-0.210903	-0.194607	-3.13931				+	0.931315	0.151372	0.119761	0.0035783	-0.22485	-0.208553	-3.15326
DMKJLJHC_00255 Cell division coordinator CpoB	MLRAMTLSAALLFSAAIPSFAQDASRTQTLADIKTELGQVQGEIDGLRSELKASGAAGLQRAGGSSALERMDSMELSLSHLTDRVEELENKINRVVADGTNRVGDLEYRVCEMEKGCDISKLGATKPLGGGDASTTPSVNAPASDSATDSPDLAINEKSDFEAGKAAYEKGDYASAADLLATFKETYPGSPLMGDAMYYRGDALSKEGDTANAARAWLAGFSADPTGKRAGDNLLALGKALGQLGQTSEACTTLGQVGTRFPGSSAAMEAQTARQNLNCQ				21.5592	21.5488	21.7195	21.9364	22.0646	21.8232	21.9028	22.2758	22.1102	22.1451	21.7997	22.4862	22.3672	21.7282	23.0299	21.6092	21.9414	22.0963	22.1437	22.3751	0.078132	0.0986399	0.1526	0.280248	0.531434	0.0036058	0.00498	0.00564324	0.00566563	0.0191893	0.332227	0.487103	0.534497	0.76593	+	+			0.0202303	0.0158887	0.0601656	0.113944	0.154877	0.20227	0.433703
DMKJLJHC_00257 ATP-dependent zinc metalloprotease FtsH	MGNARNLAFWAVLFLLILALFNLFGDGQSNMNSSQATYSEFIDAVDKGEVKSAQLDGENVRYQLADGTNFTTIKPLEDPIAEKLISKGVSVRVVKQAQSGFMSLLGVWLPFLVLIGIWIFFMNRMQGGGKGGAMGFGKSKAKLLTEKHGRVTFDDVAGIDEAKEELEEIVEFLRNPQKFSRLGGKIPKGGLLVGPPGTGKTLLARAIAGEAGVPFFTISGSDFVEMFVGVGASRVRDMFEQAKKNAPCIVFIDEIDAVGRARGVGIGGGNDEREQTLNQLLVEMDGFEANEGIIIIAATNRKDVLDPALLRPGRFDRTIHVPNPDIKGREKILTVHARKVPVGPDVDLRTIARGTPGFSGADLMNLVNEAALMAARIGRRFVAMEDFEQAKDKVMLGVE…	K03798	ftsH; cell division protease FtsH [EC:3.4.24.-]		26.2452	26.1145	26.2502	25.4962	25.7172	25.572	25.7367	25.8147	25.8063	25.5721	25.3526	25.3569	22.8985	21.9157	23.359	26.2033	25.5952	25.7859	25.4272	22.7244	0.0628354	0.0917096	0.034984	0.102508	0.601942	0.087091	0.0626788	0.072814	0.0551678	0.0244468	-0.608143	-0.417407	-0.776113	-3.47886	+	+	+	+	0.00150362	0.00120061	0.000798964	0.00124563	0.190737	-0.16797	-2.87071
DMKJLJHC_00258 Trans-aconitate 2-methyltransferase	MSDGIKDWNPDSYARFRDVRLRPALDLLAQIPTLPERGKVVDLGCGSGAVAEALSTRFPKRKLVGVDQSEAMLQKAASTGAYRRLDQDDISRWEPNKPPALIFSNAALQWVPNHAALLPRLAGALRPGGVLAVQMPAQQRAPSHRILRELAQEMFPDRFDFTGWEPPVAATVDYAQILRKLGRYDLWTSEYLHQLPIAEDGHPVRLFTQSTAMRPYLTQLSDTEQAAFIRRYETALQTVYPVQADGSVLLPFRRLFLVLQREA	K00598	tam; trans-aconitate 2-methyltransferase [EC:2.1.1.144]		21.0053	21.2814	21.039	21.3982	20.6947	21.3172	21.0817	20.7808	20.2421	20.8973	20.8794	20.1526	21.4613	21.08	22.0211	21.1086	21.1367	20.7015	20.6431	21.5208	0.122999	0.314304	0.347321	0.346913	0.386534	0.00254866	0.00285098	0.00214615	0.00200235	0.0106143	0.0281233	-0.407087	-0.465463	0.41222					0.911875	0.193208	0.148225	0.224033	-0.43521	-0.493587	0.384097
DMKJLJHC_00261 Bifunctional protein FolD protein	MSASIIDGKAFAAGVREKVAGHVARLREEHGIKPGLAVVLVGEDPASEVYVRNKGKQTLEAGMNSYEHKLPDTTPEADLLALVARLNADPAVHGILVQLPLPDHIDAEKVINAIEPAKDVDGFHILNVGLLGTGQKAMVPCTPLGSLMMLRDQLGSLSGLNAVVVGRSNIVGKPMAQLLLRESCTVTIAHSRTKDLADVCRGADILVAAVGRARMIPGDWIKPGATVIDVGINRIPAPEKGEGKTRLVGDVDFESAVEVAGAITPVPGGVGPMTIACLLANTVTACYRAHNLPEPEGLTA	K01491	folD; methylenetetrahydrofolate dehydrogenase (NADP+) / methenyltetrahydrofolate cyclohydrolase [EC:1.5.1.5 3.5.4.9]		25.9197	25.8109	26.0091	25.461	25.4343	25.3253	25.5539	25.5022	25.8354	25.5017	25.3703	25.2697	23.4361	22.4105	21.6338	25.9132	25.4069	25.6305	25.3806	22.4935	0.0810505	0.0586788	0.146415	0.0950017	0.738083	0.0712287	0.0550101	0.0653781	0.0534137	0.0208303	-0.50636	-0.282753	-0.532667	-3.41975	+		+	+	0.00201749	0.0752154	0.00380679	0.00286816	0.223607	-0.0263067	-2.91339
DMKJLJHC_00262 Cell division topological specificity factor	MSLFGFSLKPRRPKSAQMAKDRLQILLAHERGKGSTEPDYLPAMQNDILAVIRKYMKIEDNDVDIRMESKDDISSLEINIELPTHKSDAAGAKSGPKSAAR	K03608	minE; cell division topological specificity factor		22.3614	22.7945	22.2826	20.0562	20.2812	20.3729	20.4811	21.1493	20.1085	19.559	20.4958	20.3754	21.7241	22.8087	21.3871	22.4795	20.2368	20.5796	20.1434	21.9733	0.225059	0.133086	0.430574	0.416169	0.606529	0.00659164	0.00152786	0.00197233	0.00141614	0.0145245	-2.24273	-1.89984	-2.33609	-0.506203	+	+	+		0.000264976	0.00522409	0.00221245	0.330549	0.342887	-0.0933667	1.73652
DMKJLJHC_00263 Septum site-determining protein MinD	MTQLKEESARGRVIVITSGKGGVGKTTSAAAISAAIAKRGHKVVVIDFDVGLRNLDMIMGCERRVVFDFINVVQGDARLSQALIKDKRVETLSILPTSQTRDKDALTNEGVEKVLEELRDEFDYIICDSPAGIERGAQMAMYYADEAVVVTNPEVSSVRDSDRVLGLLASKTRRAEKGETPVKSQVLLTRHDQGRIDRGEMMTVEDVLELLAVPLLGIVPESPAVLRASNVGMPVVLDETPSSAAAAYEDAVARLLGEDVPMRIGTDKRPGLLGRFFGRSA	K03609	minD; septum site-determining protein MinD		25.7204	25.3694	25.6543	25.4562	25.4217	25.4406	25.434	25.5226	25.4626	25.1451	25.2811	25.2651	24.81	22.1794	22.575	25.5814	25.4395	25.473	25.2304	23.1881	0.152288	0.0141347	0.0369212	0.0606828	1.15814	0.0565924	0.0562682	0.0586182	0.0481345	0.0337131	-0.141887	-0.10836	-0.350957	-2.39328			+	+	0.259753	0.383473	0.038871	0.0442278	0.0335267	-0.20907	-2.25139
DMKJLJHC_00264 Septum site-determining protein MinC	MQTPSSEDRSASDPVSVRPFHFRGLFLTAVALRIETTVFDESFYSRLDAQLAQAPQILDDAPIVLDFALVPELDQPGTIRDLIDNLFQRDLLIFGAQNATELQLSTVRGYGIIPIKVGRETALPAARAKAKRAEAKAAAPAPASTNVTVTSSVRSGQMVVAEHGDLTIVGSVASGAEIVAAGSIHVYGTLRGRAIAGAHGDESARIYCRSQQAELMAIAGLYKTSETIPPELRKQGVQVFLDGDKLCVEAFE	K03610	minC; septum site-determining protein MinC		22.3261	22.1891	22.2933	22.0458	22.1719	21.9898	21.7699	21.7648	21.8529	21.7533	21.4765	21.4503	21.9541	21.8503	20.5966	22.2695	22.0691	21.7959	21.56	21.467	0.0584057	0.0761674	0.0403704	0.137066	0.616922	0.00569861	0.00544105	0.00458248	0.00378057	0.0102255	-0.200323	-0.473583	-0.709427	-0.802487	+	+	+		0.0419039	0.000704177	0.00253398	0.140997	-0.27326	-0.509103	-0.602163
DMKJLJHC_00274 Outer membrane lipoprotein Omp16	MNVQRYPMRKTALLLTVGLALAACSANNSFQNGEAGDGIGTKSTGFGSANAQNTAVMSGDQTYAINLTRKFASEVPNTVNFAFNSSALSPQARSALARQASWIRQFPQIRFRVYGYTDLVGSNAYNKALGMRRARAVVQFLETQGISRQRLEAVVSYGETRPLVYTPAPNEANRRAVTEVSGFISGGKPMPMDGKYAEVVYNEYINSAKPEQTIVIKGKDGGGGG				24.1822	24.3966	24.6327	24.794	24.784	25.1496	24.8533	24.804	24.7424	25.0582	24.9248	24.9814	23.9202	21.6614	20.8317	24.4038	24.9092	24.7999	24.9881	22.1378	0.183995	0.170056	0.0453943	0.0546583	1.30511	0.0250189	0.0389604	0.0367619	0.0406927	0.0162788	0.50539	0.396093	0.584333	-2.26601	+	+	+		0.04627	0.041728	0.0125925	0.0718733	-0.109297	0.0789433	-2.7714
DMKJLJHC_00275 Type II secretion system protein D	MEFRTLIKACLIGTAIAFASFPMAQADTLKIMSGTSQAPLNVPMNRAVVVESDVPFSELSIANPGIADVQTLSDKSIYVLGKLPGRTTMTILGKGGTLISNVDVQVTPDIAEFKERLKQILPGENIDVRTANDGIVLSGTVSSAQKLDRALDLAKRYAPDRVSNLLSVSGTQQVMLKVRFAEMQRSVAKSLDSSIGLGVTNRGSFTGGIGNGPSVGGAGSAAQNGGGLGFSLGRGTFQMNLLLEALESKGVVRTLAEPNLTALSGQQADFLAGGEYPIPVVDDKGTTIQYKPFGVELKFTPRVVDGNIINLEIGASVSSIDTATSVTQNGFNVNAFKKRATSTTVEMRDGESFAIAGLLQDDFTDASSQIPWLGDVPVLGALFRSADFQRKQSELVIIV…	K02280	cpaC; pilus assembly protein CpaC		26.3154	25.9187	26.2444	26.637	26.5828	26.5057	25.6541	25.615	25.6934	26.4126	26.6634	26.3494	21.0288	21.6824	27.6551	26.1595	26.5752	25.6542	26.4751	23.4554	0.172692	0.0538555	0.0320393	0.13562	2.9816	0.0844874	0.123632	0.0664606	0.114065	0.0405762	0.41565	-0.505337	0.315627	-2.70408	+	+			0.0313903	0.0152368	0.111855	0.2696	-0.920987	-0.100023	-3.11973
DMKJLJHC_00282 Decaprenyl-phosphate phosphoribosyltransferase	MRQTRPLVLDVDGTFLRTDLLFEAFWAGLGRAPLPTLKTALRHITHPARLKAELAAQVDLRLDLMPVTPSVAQAVSQAQEAGREVVLASASNEGQVRALAAAHGLSGQVFASDGDTNLKGEAKAQALIAAYGERGFDYAGNEAADLAIWRHAERALVVGHVPQATSLPRRDMLEGGWSWRALLKALRPHQWVKNVLLVLPLIAAHRFDLDTLLPIVLGMIAFSFAASSIYIVNDLLDLEADRLHPTKCRRPFAAGTVPIRIGMATGLGLALASLALAGALNLGFFGIVLLYMLTSLAYSLKLKRMRWVDIATLATLYTIRVVAGAAAGEVDVSIYMLIFIFPVFIALGCVKRLTELTLATSDARLPGRGYGRADRGDLLNVAGLGVFGALLVFFLYSVS…				22.31	22.3273	22.076	22.0966	22.1268	21.9701	19.9753	19.8507	19.4905	22.2992	22.2047	22.0819	21.094	21.3247	21.5165	22.2378	22.0645	19.7722	22.1952	21.3118	0.11461	0.0678505	0.205542	0.0889589	0.172719	0.00557487	0.00542358	0.00112696	0.00587181	0.00918249	-0.17329	-2.46561	-0.04255	-0.92603		+		+	0.139595	0.000120802	0.699597	0.0032107	-2.29232	0.13074	-0.75274
DMKJLJHC_00283 putative oxidoreductase	MKNSWIILGATSGIARALIRKLAEQGHTLFLAGRNMPELEAIAADCRLRGAPAAEIMRFDARDHSNYAELIAQLEAQEGILNCAVFTGSMPEQDVVDANPQMIEGVMADSYTGPATFLSLLAPLMEARGSGAIAGIGSVAGDRGRLGNYVYGASKAAFATYLSGLRNRLGRSGVHVMTVKPGPVDTPMTRGMELPLMTTPDAVADDILQGLARKRNVLYTRKIWQLVMGIIRLIPEPIFKKMSI				19.9246	20.9293	20.1004	21.6853	20.6148	21.5816	21.7993	21.672	21.6668	21.763	21.7551	21.7471	22.4692	21.6485	22.3204	20.3181	21.2939	21.7127	21.755	22.146	0.438101	0.482065	0.0612562	0.00649121	0.357008	0.00147348	0.00317916	0.00432574	0.0043277	0.0163719	0.975823	1.39462	1.43696	1.82794		+	+	+	0.101507	0.0111728	0.00974805	0.0102279	0.4188	0.461137	0.85212
DMKJLJHC_00286 putative aminotransferase	MLTNDQLDKWDRENFFHPSTHLAQHARGETPTRIVTGGKGVYIEDRDGNKLLDAFAGLYCVNVGYGRSEIAEAIAEQAKELAYYHAYVGHGTEASITLAHMVLERAPANMSKVYFGLSGSDANETNIKLIWYYNNILGRPEKKKIISRWRGYHGSGVMTGSLTGLAAFHNKFDLPRAPILHTEAPYYFRRPKADMTEAQFTAHCAAELEALIEREGADTIAAFIGEPVLGTGGIVPPPEGYWAAIQAVLDKHDILLVADEVVTGFGRLGSMFGSDHYGMKPDLITIAKGLTSAYAPLSGSIVGDKMWKVLEQGTDENGPIGHGWTYSAHPIGAAAGVANLKLIDQLGLVGNAGSTGKYFNDAMKAALGDHVHVGDVRGEGLMCAVEFVKDREQRTFFDA…	K15785	doeD; L-2,4-diaminobutyrate transaminase [EC:2.6.1.76]		28.5003	28.4829	28.4248	26.3141	26.606	26.8635	26.6781	26.5631	26.4844	26.9054	26.6714	26.7525	25.7776	24.0243	25.4327	28.4693	26.5945	26.5752	26.7764	25.0782	0.0322953	0.224425	0.079556	0.0970139	0.75841	0.418906	0.125303	0.125843	0.140558	0.12496	-1.8748	-1.8941	-1.69288	-3.39114	+	+	+	+	0.000305827	6.29063e-06	1.97216e-05	0.00321092	-0.0193	0.18192	-1.51634
DMKJLJHC_00287 Succinate-semialdehyde dehydrogenase [NADP(+)] GabD	MLDTAMSARPDISDKRLLRSFSYVNGKWVAADEGAVIAVTNPADGARLGDVAALSGAQSRAAVDAAQAAYLDWSMTLPQERSTLLRRWFDLIIAAKEDLARIMVLEQGKPLSEALGEIDYAASFIEYYAEEAKRPNIEGVTSHLPDAEVELWLEPVGVVGLVTPWNFPSAMLTRKAAAALAAGCTVVAHPSSETPFSALALAELAERAGFGPGVFNVITGHAPEIVEPWTKDARVRTLSFTGSTEIGRLLYRQSADTVKRLVLELGGHAPVIVFKGADLDRAVAETIKAKFATSGQDCLGANRIYVERPVYAEFCRRFTEATQALSVGIGMDDPDIGPLMNEKAVAKQEEHVADALAKGATLACGGKRLDRGPLFYAPTVLTDVPDDALIMREETFGPV…	K15786	doeC; aspartate-semialdehyde dehydrogenase [EC:1.2.1.-]		26.6709	26.7392	26.7033	23.8851	23.6457	23.8185	23.9897	24.0516	24.3111	23.8391	24.0553	23.9895	22.115	21.8659	22.2164	26.7045	23.7831	24.1175	23.9613	22.0657	0.027895	0.100894	0.139207	0.0904853	0.147288	0.123265	0.0178501	0.0229068	0.0199719	0.0154859	-2.92135	-2.58701	-2.74313	-4.63871	+	+	+	+	2.46227e-06	1.34708e-05	2.12106e-06	1.6303e-06	0.334343	0.178223	-1.71736
DMKJLJHC_00289 putative succinyl-CoA:3-ketoacid coenzyme A transferase subunit B	MAWDRDQMAARAAQELQDGTYVNLGIGIPTLVPNHIPEGVNVTLQSENGMLGMGPFPYEGEEDPDLINAGKQTITELPNTAYFDSSMSFGMIRGGKIAMAILGAMEVAENGDLANWMIPGKLVKGMGGAMDLVAGVKRVVVVMDHTNKHGESKLLKACTLPLTGTGVVNRIITNLGVLDVVEGGLKIVETADGVSEDEIRAATEATIVN	K01029	E2.8.3.5B; 3-oxoacid CoA-transferase subunit B [EC:2.8.3.5]		26.2009	26.152	26.2775	25.4224	25.6264	25.4502	26.2293	26.3966	26.1417	25.7024	26.1011	25.8056	25.8234	20.8199	21.3139	26.2101	25.4997	26.2559	25.8697	22.6524	0.0516493	0.0903197	0.105751	0.16896	2.2513	0.0875048	0.0586649	0.100855	0.0749711	0.0232558	-0.710463	0.0457433	-0.340447	-3.55775	+				0.000643247	0.611792	0.0527086	0.0891831	0.756207	0.370017	-2.84729
DMKJLJHC_00290 putative succinyl-CoA:3-ketoacid coenzyme A transferase subunit A	MNKVYGSAKEALDGLLFDGMLIAAGGFGLCGIPELLIDALVEDGVKDITVASNNCGVDGFGLGKLLDTKQIKKMMSSYVGENAEFMRQYLSGELELEFNPQGTLAERMRAAGHGIPGFYTKTGVGTQIAEGKEEKQFGGETYILEEGIFADLSIVKAWKADETGNAIFRKTARNFNPPAAMCGKTCVMEVEEIVPVGSLDPDQIHLPGIYVHRLIQGDHEKRIEKVTTRKKEG	K01028	E2.8.3.5A; 3-oxoacid CoA-transferase subunit A [EC:2.8.3.5]		25.811	25.9146	25.8693	25.2989	25.3772	25.375	26.0149	26.0304	26.0657	25.3875	25.5294	25.5329	25.2977	21.0078	25.0068	25.865	25.3504	26.037	25.4833	23.7708	0.0424081	0.0363943	0.0212455	0.0677322	1.9573	0.0688845	0.0528982	0.0866584	0.0573543	0.0504893	-0.51456	0.17206	-0.381697	-2.09418	+	+	+		0.000200726	0.0068383	0.0025047	0.204888	0.68662	0.132863	-1.57962
DMKJLJHC_00291 DNA topoisomerase 1	MAVVVVESPAKAKTINKYLGSDYTVLASFGHVRDLPPKDGSVDTDNDFDMKWEVASDSKKHIKAITDALKDDDTLILATDPDREGEAISWHLQEALEKKLKGKNVSRVTFNAITKTAILEAMKHPRQVDAPLVEAYLARRALDYLVGFNLSPVLWRKLPGAKSAGRVQSVCLRLIVEREMEIEAFDAREYWSVVARLETPRGQDFEARLSVLGGKKLEKYDLANETAAEMAVQAVSARALKVTSVEAKPASRNPYPPFMTSTLQQEASRKFGMGAKAAMSAAQRLYEAGHITYMRTDGIDMAPEAVTAAREAIKDKFGAKYVPDSPRIYKNKAKNAQEAHECIRPTDMAKSPDQLKLADDQFKLYDLIWKRTIASQMEAARFERTTVLIGSDDNQVELR…	K03168	topA; DNA topoisomerase I [EC:5.99.1.2]		24.7687	24.5519	24.7115	24.5065	24.5212	24.508	24.4076	24.1199	24.481	24.4408	24.6585	24.5661	21.1546	21.9174	22.3415	24.6774	24.5119	24.3361	24.5551	21.8045	0.0917294	0.00659788	0.155827	0.0892322	0.491084	0.0302428	0.0295825	0.0266562	0.0301415	0.0129207	-0.165443	-0.341217	-0.122257	-2.87289				+	0.0637025	0.0558832	0.24804	0.00124358	-0.175773	0.0431867	-2.70744
DMKJLJHC_00293 Metalloprotease TldD	MSQPDRFSPFETALDRDTALRHLRAATAGADDGELFLEQRRSESLVFDDGRIKTASYDASEGFGLRAVKGEVAGYSHSTEISETALARAVETARLAVGEGGGTMSAPPKGTNRHLYSDTDPVSGTPFAAKIDILREIDAYARDLDARVVQVSASMAASLQEVFILRPEGELVSDIRPMARLNVAVIVEEAGKRESGNAGGGGRFGLTGLIDPTAWKPVVAEALRIALVNLSAEPAPAGVMDVVLGPGWPGVLLHEAVGHGLEGDFNRKKTSAFAGLLGQQVAARGVTVLDDGTIPDRRGSITIDDEGTPSGKNVLIEDGVLVGYMQDRQNARLMGVEPTGNGRRESFAHTPMPRMTNTYMLGGEADPASILADLSDGIYAVGFGGGQVDITNGKFVFNC…	K03568	tldD; TldD protein		25.1157	25.0481	25.2446	25.1149	25.2954	25.0804	25.3021	25.0813	24.9691	25.2621	25.2493	25.184	23.3327	20.4853	23.133	25.1361	25.1636	25.1175	25.2318	22.317	0.0815235	0.0942839	0.138322	0.0341814	1.29776	0.0415646	0.0464728	0.0458142	0.0481808	0.0184318	0.0274333	-0.01866	0.0956833	-2.81914				+	0.771146	0.87742	0.200583	0.0374357	-0.0460933	0.06825	-2.84657
DMKJLJHC_00294 Cytochrome c oxidase subunit 2	MGIMRFASISRGLAAAVTFIGLHALTVVQAQAQDMIKGLPVIGKPHLGGVGFQPASSSLAEDQQWLDHMLLVIIALICVFVFALIFYALLRFNSRANPTPRSFTHNTPIEITWTLVPVAILVVIGAFSLPALWNQQEIPEGDITVKVTGYQWYWGYEYPDEDVSFDAIMLTKDELADHGYAPDEYLLAADNAMVVPVGKTVVVQVTGADVIHSWTVPAFAVKQDAVPGRIAQLWFKADQEGVYFGQCSELCGTNHAYMPIVVKVVSPEVYANWLERAKNDFASVEADGVVQVAQN	K02275	coxB; cytochrome c oxidase subunit II [EC:1.9.3.1]		23.6837	23.4313	23.581	23.7583	24.2361	23.8976	24.5442	23.7545	24.0263	24.5194	24.3187	24.1175	21.7536	21.232	21.566	23.5653	23.964	24.1083	24.3185	21.5172	0.103604	0.20063	0.327579	0.164075	0.215727	0.0139915	0.0202345	0.0227627	0.0255827	0.0105879	0.398667	0.543017	0.7532	-2.04812			+	+	0.0669893	0.0890979	0.00536567	0.00026733	0.14435	0.354533	-2.44678
DMKJLJHC_00299 hypothetical protein	MARFIFPLLLGVVGCAILISLGVWQVQRLEWKRAMLAEISAKIDGVPQELPPEGTDTEALKYEPVEIAGGTTGQEILVLSGQKGVGAGYRVIDAFETGDGRSILLDRGFLPEADKGQPRPPTALIVTGNLHWPRESDAYTPEPDPKTGLWFARDVPAMAKQLGTEPVMVVARHVEGDAQGISPEPVTISGIPNDHLGYAITWFLLAIVWAGMTIFLLWRIRRQPI	K14998	SURF1; surfeit locus 1 family protein		20.0249	20.2116	19.4237	20.2075	20.3211	20.1163	20.1692	20.4619	20.6918	20.274	20.1275	20.2236	21.9093	21.5154	21.2193	19.8867	20.215	20.441	20.2084	21.548	0.336167	0.0837915	0.213872	0.0607554	0.28266	0.00109267	0.00150497	0.00179161	0.00148141	0.0108162	0.328283	0.5543	0.3217	1.66129				+	0.251288	0.120521	0.253754	0.00588881	0.226017	-0.00658333	1.33301
DMKJLJHC_00300 Threonine synthase	MRYVSTRGQAPVLNFGDAMLTGLARDGGLYVPETVPQMSRDEIAALAGLSYEEVAFRVMKPFVSETFSEEELRGAITRAYAGFGHVARAPMVQLAPNHFLLELFHGPTLAFKDFAMQVIGQLFQIELERRQQKITIVGATSGDTGSAAIEAFRGLDNVDVFILFPHGRVSEVQRRQMTTPIESNVHALAMDGDFDDCQAKLKDMFNDFTFRDEVGLAGVNSINFARVLAQIVYYFTAAVSLGAPERKISFTVPTGNFGDIFAGFLAREMGLPIERLVIATNQNDILHRCLERGDYTKQGVTPSISPSMDIEVSSNFERALYWAYGKDGTAIAALMDELKTEGSFTVSQNAIGALRAVYDSGMASEARTLAEIADSLKETGELLCPHSAIAVSVGKQALA…	K01733	thrC; threonine synthase [EC:4.2.3.1]		26.273	26.3135	26.2234	25.8865	25.9363	25.8798	25.9809	26.0347	25.8647	26.2114	26.2742	26.1562	26.0312	22.234	23.6104	26.27	25.9008	25.9601	26.2139	23.9585	0.0368094	0.0251833	0.0709556	0.048199	1.56963	0.0912107	0.077472	0.0821581	0.095174	0.0575071	-0.369127	-0.3099	-0.0560533	-2.31144	+	+			0.000304699	0.00538884	0.261256	0.105783	0.0592267	0.313073	-1.94231
DMKJLJHC_00301 putative zinc protease	MIEMTTLKNGLRVVTEKMPGLVSASLGIWVTAGGRHERPEQNGIAHFLEHMAFKGTKTRSALQIAEAIEDVGGYINAYTSREMTAYYARVLEADVPLALDVISDILLNPVFDQREIEVERGVILQEIGQSLDTPDDVIFDWLQEAAYPNQPMGRTILGPAERVRGFGRDDLSGFVREHYGPDQMILSAAGTVDHADIVKRAETIFGDMTPSLNPAPERSVWSGHERREVKTLEQAHFALGFEAPSYRDADLYTVQVYSTAMGGGMSSRLFQKIREERGLCYTIFSQAGAYEDTGMFTIYAGTSGDEIRGLSDLTIDEMKRAADDMSEAEVARARAQLKAGMLMGLEGASARAERMARSLHVWGRVPDIEEAAARVDGVTVEAVRSFAGRLAGSGRTALA…				23.9914	24.112	23.8321	23.6391	23.6889	23.0152	23.3973	23.5493	23.6726	23.4819	23.462	23.7583	21.9562	22.1778	21.1678	23.9785	23.4477	23.5397	23.5674	21.7673	0.114618	0.306518	0.112604	0.135225	0.433441	0.0186313	0.0141476	0.0153482	0.0151995	0.0125917	-0.530763	-0.43876	-0.411123	-2.21124		+	+	+	0.0835144	0.0181195	0.0305031	0.00222174	0.0920033	0.11964	-1.68047
DMKJLJHC_00303 Aspartate kinase	MPKGVSMPILVMKFGGTSVADLDRIANAAAKVQREVERGYDVIVIVSAMSGRTNELVNWVETTSPLYDAREYDAVVSSGENVTAGLMAMRLQEMGVSARSWQGWQVPINTTSAHGAARFESIPRDNLDAKFSEGFKVAVIAGFQGLSPEGRITTLGRGGSDTTAVAFAAAFEAERCDIYTDVDGIYTTDPRVSDKARKLDRIAFEEMLELASLGAKVLQTRSVELAMRYKVPLRVLSSFEETDDNSGTLVCDEDQIMESKVVSGVAFSRDEAKMTLVTVEDRPGIASAIFGPLADAGVNVDMIVQNISEHQAQHAEKVTDMTFSCPINQVARARKAMEDARAAGLISFDDLVVDQDVAKISVVGIGMRSHAGVAAQMFKALAAENVNIKVIATSEIKIS…	K00928	lysC; aspartate kinase [EC:2.7.2.4]		25.3282	25.5399	25.1676	25.0716	25.1018	25.041	25.0105	25.2247	24.987	25.1998	25.1408	24.9283	24.2405	21.5572	23.8841	25.3452	25.0715	25.074	25.0896	23.2273	0.152447	0.0248543	0.106945	0.116595	1.18988	0.0480466	0.0435988	0.0444558	0.0436579	0.0346405	-0.273743	-0.27116	-0.255607	-2.11795					0.0663148	0.10854	0.132747	0.0669912	0.00258333	0.0181367	-1.84421
DMKJLJHC_00304 Phosphoenolpyruvate-dependent phosphotransferase system	MVEYSDSDSRTLLKRLRDTLATDGDGQDRLNRITHLIADSLGTQVCSIYLFRDPETLELCATEGLNPAAVHRTRMRLGEGLVGRVARSGRPINSADAPSEPGFRYMEETGEEIYSSFVGVPIQRVGEKLGVLVVQSKEKRSFTEDELYGLDVVAMVLAEMTELGAFVGGENAEIGTTHRFPVMFRGATGQEGAAEGRVWLHEPRVVVTNPVGEDPETEQERLETGISDLRERIDEMLAQTAIIDKDQRQVLETFRMLAASKGWKRRMSEDIAAGLSAEAAVEKEQSSARARMQMAPDPYLRERLNDLDDLSNRLLRILTGQGTDTGAELPDNPVLVARNIGPAELLDYDRKLKGVVLEEGSVGSHAAIVARALSIPLVIHAGRITSEALNGDPILVDGD…	K08484	PTS-EI.PTSP; phosphotransferase system, enzyme I, PtsP [EC:2.7.3.9]		23.731	23.5411	23.5244	23.2921	22.7173	23.0657	22.1813	21.8947	22.4219	23.3065	23.1475	23.3853	20.908	20.6738	21.1593	23.5988	23.025	22.166	23.2798	20.9137	0.0936817	0.236416	0.215464	0.0989376	0.198262	0.0143203	0.0105543	0.00592256	0.0124522	0.00696855	-0.57383	-1.43287	-0.319073	-2.68511	+	+	+	+	0.0331791	0.000993598	0.0296056	6.52607e-05	-0.859037	0.254757	-2.11128
DMKJLJHC_00305 hypothetical protein	MAEILPPVSDPYLLSQIDALAKRHREASGVVMQLIGYIGGSAEGLLGKLPAPVRNGLDGATERALMGAMGAAERSRGIVSDRPDWVNRTLTTMMGAAGGAGGLGSSLAELPFTVTMLLRAIQGIAAEHGFDPASREVRLECLRVFASAGPLTRDDGMDLSFLTARTTITGPSLRSLVAKVAPRLSAVLGQKLAAQAAPILGAAAGAAVNYSFTSYYQEIARVHFDLKRLARESGTDEGLLREELVARLQG				21.2257	19.5795	20.7263	21.3773	21.5771	21.6138	21.9593	21.8455	21.8294	20.186	21.1607	21.3572	21.8692	20.4802	21.3767	20.5105	21.5227	21.878	20.9013	21.242	0.689173	0.103941	0.0578023	0.512087	0.574999	0.00168368	0.00372568	0.00485104	0.00239474	0.00874917	1.01228	1.36757	0.39083	0.731547		+			0.109191	0.048986	0.554795	0.313246	0.35529	-0.621453	-0.280737
DMKJLJHC_00309 S-methyl-5-thioadenosine phosphorylase	MDRMIGVIGGSGLYDIAGLEEPAWVSLETPWGAPSDQILTGRLSGVKVAFLPRHGRGHVHTPSSVPYRANIDALKQLGVTDVVAVSAVGSLKKAYAPGDFLIVDQYIDRTFAREKSFFGPGLVGHVSVAHPVCADLAALCAQAAKSTGLTVHEGGTYVAMEGPQFSTKAESELYRSWGADVIGMTGMPEAKLAREAELHYACIAMITDYDCWHPDHDAVDVAQVIAVAQKNAAKARDLLTALPELIAGPQERCATGCGAALDSAVMTAPGKRDPEMIHRLQTVAGRVL	K00772	mtaP; 5'-methylthioadenosine phosphorylase [EC:2.4.2.28]		23.9392	23.8291	24.0805	24.2094	24.1175	24.2376	24.1185	24.3129	24.1466	24.3122	24.0872	23.9665	21.6495	21.9307	21.5125	23.9496	24.1882	24.1927	24.1219	21.6976	0.102896	0.0512766	0.0858009	0.143246	0.174067	0.0182618	0.0236362	0.0241329	0.0223238	0.0119979	0.23857	0.24307	0.172333	-2.25203	+			+	0.0426132	0.0622556	0.239183	9.49262e-05	0.0045	-0.0662367	-2.4906
DMKJLJHC_00310 Adenine phosphoribosyltransferase	MSPQSKTVKDYIRTIADFPHEGILFRDVTTLFADPRGFRMAIDQLLHPWAGQQIDKVVGLEARGFILGGAIAHQLSKGFVPIRKKGKLPGQTISQAYTLEYGEAVMEMHEDAIQPGEKVLLVDDLLATGGTAQAGIQLLERVGGEIVGCSFIVDLPELGGRRLLESLGMNVSVLCEFDGA	K00759	APRT; adenine phosphoribosyltransferase [EC:2.4.2.7]		22.9027	22.873	22.871	21.9241	22.168	22.2316	22.4772	22.2893	22.0271	22.3429	22.1403	22.3921	22.8214	21.8007	20.9208	22.8822	22.1079	22.2645	22.2918	21.8476	0.0144784	0.132562	0.184566	0.108983	0.776606	0.00871434	0.00558921	0.00634135	0.00627809	0.013313	-0.774343	-0.6177	-0.590483	-1.0346	+	+	+		0.00119833	0.00918141	0.00161175	0.132712	0.156643	0.18386	-0.26026
DMKJLJHC_00311 putative FAD-linked oxidoreductase	MLSPADDALATRLAEAVPGLRIGAPEPRHLEEPRGRYHGLGGLLVRPRSTQEVAAIVALCHAHRVAIVPYGGGTGLVGGQILESGPPPVLLSLEAMRSVRAVTRHVLEIEAGASLQDAHDAAEAEGRLFPLTIASQGSAQIGGVLATNAGGVNVLRYGNARELCLGVEAVLADGTVISGLKHLRKDNTGYDLKDLLIGSEGSLGIITAATLRLHPRPAAQGTAMMVVRDPTAALSLLELAEARMPGCVSAFELISGQGLGFLRDVGPEVHQPFAQPPEWMVLIEIGLPDGIAPEEALTDLFEAAGELVQDGVIASSQGQRNQMWTLRESLPEANKRIGSISSHDISLPLPKLAEFIDTARARIAALGDMRINCFGHVGDGNLHFNVFPAKGRERSEYEA…				23.231	23.0736	23.04	22.9499	22.873	22.6587	23.1304	23.064	22.7646	22.4377	22.7616	22.6512	21.2865	21.663	21.702	23.1149	22.8272	22.9864	22.6168	21.5505	0.0832445	0.123196	0.159101	0.134452	0.187355	0.010239	0.0092019	0.0104585	0.00786477	0.010835	-0.28767	-0.128497	-0.498017	-1.56435			+	+	0.05211	0.368771	0.0112139	0.000418259	0.159173	-0.210347	-1.27668
DMKJLJHC_00314 Efflux pump membrane transporter BepE	MNISEIFIRRPVLSMVLGAFMLLIGAQAYFNLPVRQYPEVEETVVTITTAYPGASPELIQGFITSPIAAAVATTENVDYVTTQSRPSASVISVHMKLGSNSDAAMTEVLSKVQQVKGELPPEAKDPVIVKGTGQQFALMYLAAQNPNMTPEQLTEYLNRVIKPRMSTIPGVAQTQIIGASDYAMRVWLDPDKLAARQVTASEVLNAIRASNFLSAPGKTKNEYVTQSITLQSTLQTPEAFGKLPIRSNGDEVVRLRDVAKIELSKAADNEIVTFEGTQGTFIGVFPTPSANPLDTAAAVTKELPSINASLPEGMKIDLVYDSTETISASIHEVFKTIGEAVAIVVVVILLFLGSFRSVAMPIVTIPLSLIGVLGVLMALGYSINLLTLLAMVLAIGLVV…	K18138	acrB; multidrug efflux pump		26.362	26.324	26.4139	26.9095	26.4031	26.6466	27.1981	27.1439	27.1025	26.7804	26.4288	27.0276	21.6343	21.8268	23.4196	26.3666	26.6531	27.1481	26.7456	22.2935	0.036871	0.206799	0.039134	0.245709	0.800095	0.0975307	0.130494	0.187195	0.137585	0.0181345	0.28646	0.78151	0.378973	-4.07309		+		+	0.126023	3.30835e-05	0.0972064	0.00198061	0.49505	0.0925133	-4.35955
DMKJLJHC_00315 Toluene efflux pump periplasmic linker protein TtgA	MIKRLLIAIVVLILVVGGIVGFNLFRTKMIGQFFANMKPPTVAVSVSEVKERSWTPGLEAIGTASAARGTDLAVETGGTVKEIDFKSNDAVKQGQLLIQIDDSSERADLQASKAALELAETNLTRARQLSQRGVSATSNLDQAEATAQEARASVAKLEAVLQKKRLTAPFSGVIGIPQVEVGQYVATGTAFATLQDSDHMRVDFTLSEQQARKAKVGQTVEITTEDGTLKLEGKITGVEPKIDPNSRLVTLRADVENDDHRLSPGQFTHVRVVLPTEQGVIALPQTVVSSSLYGDSVYVVREKTPEGADAPQLTADQVFVTLGRRSGTLIEVTKGLKAGDLVVNAGQNKLTPGAPVKIDNTISPDPNAPTTEQVNADAGTGSAPAKDTAGSDQKDATSD…	K03585	acrA; membrane fusion protein, multidrug efflux system		26.8988	26.9827	26.9584	27.4453	27.461	27.4307	28.0557	28.0707	27.9009	27.3599	27.3428	27.4046	27.3181	22.352	26.7761	26.9466	27.4457	28.0091	27.3691	25.4821	0.035229	0.0123726	0.0767402	0.0260538	2.22433	0.145795	0.226038	0.339994	0.211967	0.165327	0.49902	1.06246	0.422477	-1.4646	+	+	+		4.61514e-05	5.8606e-05	0.0001675	0.404526	0.563443	-0.0765433	-1.96362
DMKJLJHC_00317 Glycine betaine transport ATP-binding protein OpuAA	MTDSTTQSAETRSGVEIRDLYKIFGSNPKRYIDAVKNGMTKTELNDKHNHVLGLQNINLELPPGQISVIMGLSGSGKSTLIRHINGLIMPTAGQILYNGRDVVQMNEQELREFRRHETAMVFQKFALLPHRTVLQNVSYGLDVQGIARSKSEPIARKWIERVGLAGYEDNYPAQLSGGMQQRVGLARALANDADILLMDEAFSALDPLIRMDMQKVLLDLQSELKKTIIFITHDLDEALRLGDKIAILRDGALSQVGTGQEIVLNPANDYIAEFVREVNRGRVIKAETVATPLPEGDAPLPELKIKGSSTLEKAARRLAEHDQRKATVVARDGRPIGTIDMHTMLTAMVTPATVDDEDAA	K02000	proV; glycine betaine/proline transport system ATP-binding protein [EC:3.6.3.32]		23.8018	23.8415	23.9672	25.7317	25.8973	25.9141	25.251	25.4046	25.1555	25.6504	26.0044	25.7854	21.3798	22.1233	22.9838	23.8702	25.8477	25.2704	25.8134	22.1623	0.0704828	0.082314	0.102605	0.145866	0.655407	0.0172837	0.0746694	0.0509364	0.0721004	0.0165581	1.97751	1.40019	1.94318	-1.70785	+	+	+	+	1.33928e-05	9.12871e-05	7.08155e-05	0.0215041	-0.577323	-0.03433	-3.68536
DMKJLJHC_00318 Glycine betaine/carnitine transport permease protein GbuB	MASCWGLPEMLCDFPALPNKDMRHMRMWIDDGFRGIVRHFSAQIDAAMQPLQWFLNTLENLFTNTPWIVILLAILAVVWLGSRSVKIVIGSIIGMCLIGVFGLWEDTMTTLAMVTVATLIAIILGLPIGIVMARSNRMQSVMTPVLDVMQTMPSFVYLIPVVVIFGIGKVPGVIAVVIYAVPPMIRLTNLGIRLVDKEVIEAADAFGANPRQKLWGVQLPLSLPTIMAGVNQTIMMALAMVVVASMVGVGGLGKNVLQAINNQFFTIGFLNGFALVAIAIIFDRTSQAFGKRLQKHSEVGHD	K02001	proW; glycine betaine/proline transport system permease protein		22.067	22.2434	22.1744	23.5314	23.7678	23.9707	22.952	23.1211	22.7646	24.1716	23.6686	23.6153	21.7358	22.57	22.4185	22.1616	23.7566	22.9459	23.8185	22.2415	0.0725711	0.179538	0.145593	0.250625	0.362845	0.00528818	0.0175254	0.0101692	0.0180892	0.0174915	1.59501	0.784267	1.65687	0.0798333	+	+	+		0.000310506	0.0024193	0.000850942	0.775498	-0.81074	0.06186	-1.51517
DMKJLJHC_00319 hypothetical protein	MKKSTLASLFLALPLSVLAAPAAFAADGECGSVTEAEMNWASAGVAAWVDKIILENGYGCDVTLITGDTMPTFTSMDEKGEPDIAPELWVNAVKLSLDKAVSEGRLVIAANILKDGGVEGWWIPKYIAEEHPDIKTVEDALKHPDLFPDPEDPSKGGIYNCPAGWNCQISTANLYRAYDAKAKGFELVDTGSAAGLDGSIANAYERKQGWLGYYWAPTAILGKYPMVRLDAGPNDKENWDTCTSQPDCANPVPNSYPTSDVYTVVTKAFSEKNPIAMGYLKKREWSNEIVGKFLAWQSDNQGTNEDTAYHFLETYPDVWKAWLSPEVAKKVEDAL	K02002	proX; glycine betaine/proline transport system substrate-binding protein		26.0606	26.0681	26.2241	27.545	27.8062	27.674	27.1198	27.3489	27.3383	28.029	27.8341	27.8419	26.7626	21.7442	25.6191	26.1176	27.6751	27.269	27.9016	24.7086	0.075344	0.106617	0.105596	0.0900948	2.14752	0.0820687	0.264994	0.203555	0.306599	0.0967189	1.55746	1.15141	1.78403	-1.40901	+	+	+		7.23535e-05	0.000231759	2.77717e-05	0.406252	-0.406043	0.226573	-2.96647
DMKJLJHC_00323 Ectoine hydrolase	MTIANPPFSQPEYQRRITLVRQAMVERGIEVLFVTNPSNQFWLTGYDGWSFYTHQGVILPLEGEPFWWGRFMDANGARRTVWMPEDNILYYNDIMVQSDVSHPMEDLASRLRIMGYGAARIGVEKETYFYTARAHEVLVEGLPEAELLDASVLVNWQRLIKSEEELNFMRRAARISELVIARAIDLIEPGMRKHDLVGELYRTAVQGEEDSWGDYPAIVPMLPSGADASAPHLTWNGEAFKSGEATFIEQSGCYRRYHSPLCRTVFLGKPPQHVIDASEALTEGLNAGIEVARAGNRACDIARALNTELLKVGIERPNRAGYAVGCSYPPDWGEHTVSIRDTDETVLEPGMTFHFMPGLWMDDWGMETTETILIREDGPAEPLSHIERKLFVKA	K15783	doeA; ectoine hydrolase [EC:3.5.4.44]		24.3279	24.3297	24.1491	24.1717	24.5228	24.4528	24.2313	24.4017	24.1768	24.2588	24.4622	24.449	23.5749	22.7437	22.6024	24.2689	24.3824	24.2699	24.39	22.9737	0.0846909	0.151714	0.0957529	0.0929083	0.428996	0.0227853	0.0270431	0.0254606	0.0268821	0.0290567	0.11356	0.00106333	0.121123	-1.29521				+	0.407645	0.991178	0.244696	0.0138188	-0.112497	0.00756333	-1.40877
DMKJLJHC_00329 Cytochrome bd-II ubiquinol oxidase subunit 1	MILSDIPTLDLARAQFAFVVSAHIIFPALSIGSASFLAVLETLRKITGKDVYLRIFEFWKHIFAVVFGMGVVSGVVMSYEFGLNWAVFSDKAGPVLGPLMGYEVMTAFFLEAGFLGIMLFGRDRVRPIIYYIAVLMVAIGTLISAFWILAANSWMQTPVGFSVNELGQFIPEDWWQIIFNPSLPYRLVHMVLAAYLTTALVVAGVGAWHHLRGTADDAVRVMFRMAVAMILVTAPIQILAGDQQGLNTLKHQPAKIAAMEGHWKTEKGAPFILFGWPEQDKERTAYKIEIPYASSLILTHSLEGEVPGLGDFPVDERPPMLVVFWTFRIMVGLGALFAVIGFWGGWLMLRKKLHEPGWFHRAALVVSPGGFLAIIMGWFTTEFGRQPFTVYGHLMTKDS…	K00425	cydA; cytochrome bd ubiquinol oxidase subunit I [EC:7.1.1.7]		23.5405	23.2216	22.9551	23.6287	23.6456	23.7345	22.0107	22.8801	20.9198	23.8384	23.5861	23.754	22.341	21.9821	22.2644	23.239	23.6696	21.9368	23.7262	22.1959	0.239321	0.0464099	0.802018	0.10484	0.154329	0.0111595	0.0164994	0.00505287	0.0169678	0.0169473	0.430547	-1.30219	0.487117	-1.04319				+	0.0669314	0.092621	0.0577848	0.00660305	-1.73274	0.05657	-1.47374
DMKJLJHC_00333 hypothetical protein	MGFPGTWMTESESMVYRVVPKCACSSIGQIMYYSDHGRYFDGDIHDSTSGLHKWAQPESQAPITENVTGHKSYAFTCVRNPYGRILSSFFDKIAGIQRNGKRYRGNLVPKLVQKYGIEVGSPEDNFDFDQIASFRRFLLFARDTIRWRRPMDPDIHWSAMSGHISTFIVNGGRYDNIFFTEKFNEGMKSVLDDIETPVKIDIESVPRFNESEGHGPKRAHKISEYFDDLSRHLVWEIYKKDFQLFQYDFDDPDNKMPIGEVDLDEVHAKLGD				24.1658	24.3011	24.3108	23.8782	23.8235	24.1368	24.3605	23.8392	24.4887	24.0594	23.8262	23.7704	22.8189	22.7459	22.6862	24.2592	23.9462	24.2295	23.8853	22.7503	0.0662172	0.136643	0.280878	0.125156	0.0542741	0.0226336	0.0199859	0.0247567	0.018947	0.0248895	-0.313077	-0.0297433	-0.37391	-1.5089	+		+	+	0.0434206	0.89116	0.0202165	1.53835e-05	0.283333	-0.0608333	-1.19583
DMKJLJHC_00334 hypothetical protein	MARIAFILLTHKDPQGVIAQAQRLTETGDFVSIHYDASAKASEFAQLRAALSDNPNVTFARKRLKCGWGEWSLVAATLEALKAAEEDFPRATHFYMLSGDCMPVKTARYAHDFLDAEDADYIESFDFFSSGWIKTGLKEDRLIYRHWFNERTQPKRFYASYRAQQRLKMAREVPADIQMMIGSQWWCLRRRTIEWVLDFIRSRPDVMKFFRTTWIPDETFFQTIVRHVVPEAEIHARTLTFLMFTDYGMPANFYNDHYDLLLSQDYLFARKISPEARELRNRLGALWAQEDVQFAISNEGRALHKFLTGRGRIGRRFAPRFWEAESTLGRERTLFIVACKKWHVAKRLVAELSARDSSIHAMEYVFDEMCELPDLGGIEKTKDKRNRHRRVLMRMLFEH…				21.791	21.985	21.6923	22.0775	22.447	21.99	21.7405	21.8781	22.0444	22.3419	21.7398	22.5888	21.509	20.9891	21.7225	21.8228	22.1715	21.8877	22.2235	21.4068	0.121595	0.198048	0.124272	0.356558	0.308	0.00418118	0.00584112	0.00488352	0.00598805	0.00980816	0.348737	0.06491	0.400757	-0.415907					0.101094	0.625449	0.206912	0.150338	-0.283827	0.05202	-0.764643
DMKJLJHC_00335 Purine nucleoside phosphoramidase	MAYSYDDQNIFAKILRGEIPNNTILETEHTLAFRDIAPKAPEHVLVIPKGPYVSFDHFCNAASDAEILDFHRTAGRICTALGVEPGEGGDGYRAITNAGENGVQEVPHFHLHILAGRPLGPMVVMR			K02503	21.6322	21.5036	21.583	19.6249	20.4892	20.0775	20.5059	19.964	20.0642	20.2312	20.0296	19.6129	21.5678	22.4467	21.581	21.5729	20.0638	20.178	19.9579	21.8652	0.0529767	0.353009	0.2354	0.257432	0.411255	0.00351633	0.00135529	0.00149306	0.00124527	0.0134757	-1.50907	-1.3949	-1.61503	0.29224	+	+	+		0.00393363	0.00121883	0.000965271	0.375315	0.11417	-0.10596	1.80131
DMKJLJHC_00341 3-oxoacyl-[acyl-carrier-protein] reductase FabG	MKRALITGGAKRLGRAMALYLAGRGIDVAIHYNGSAEAAEATAKEARALGVRASVVQADLLEEAATATLIARASESLGGPLDILINNASIFEYDTIHSATRESWDRHFDSNLRAPFVLIQDFAQQAPKAEMRDGEPRARALVLNMLDQRVRKLTPEFMTYTLAKMGLWTLTRTAAQALAPDIRVNAIGPGPTLQGARQSEEHFTRQRAATILERGANPEDICAALGYFLEAPAVTGQLICADGGQHLGWQTPDVLGPE				22.5856	22.619	22.5215	22.8623	22.8222	23.0222	23.7847	23.5395	23.4646	22.6718	22.6099	22.8262	22.4916	21.4993	21.8439	22.5753	22.9022	23.5963	22.7026	21.9449	0.0404697	0.086376	0.136676	0.0909705	0.411332	0.00704452	0.00969335	0.0159616	0.0083467	0.0142419	0.326897	1.02094	0.127287	-0.630413	+	+			0.00835992	0.000534756	0.144893	0.0972122	0.69404	-0.19961	-0.95731
DMKJLJHC_00344 putative protease SohB	MRHLLPGPRLHGRRRASTSVNMKLIQRLPFVKKPPFVAVIRLQGAIGISRPGAQGLSDAAMAPLIERAFARGKPAAVALLINSPGGSPVQSALIASRIRRLADEKGIHVHAFVEDVAASGGYWLACAADEIWADTTSVVGSIGVISSGFGLDQFIGRHGIERRVHTAGGSKSFMDPFRPEKEEDIARLKRLLEDMHDSFKDYVRARRGAKLAGDRDLFTGDIWTGRQALAEATGLIDGIGHAVPKLKELYGKNVRTVAYAPKRSIFRRFGASLGTEMGAGASGALIDVAEDRALWARYGL			K04774	21.1106	21.113	21.6103	21.8991	21.6979	21.3469	21.7596	20.0976	21.8983	21.6543	21.1109	21.2795	23.3009	22.9108	21.2964	21.278	21.648	21.2518	21.3482	22.5027	0.235002	0.228165	0.818153	0.22709	0.86774	0.00286619	0.00406355	0.00314287	0.00326438	0.0209639	0.37001	-0.0261533	0.0702567	1.22472					0.18538	0.967425	0.77626	0.126308	-0.396163	-0.299753	0.85471
DMKJLJHC_00346 NADP-reducing hydrogenase subunit HndC	MKIWVPADAAAKACGADAVAAMIAHQAAQQGREVQIIRNGTRGMIWLEPLVEIEMDGVRIGFGPMVPGDVPALFASPESHPKAVGPVEEIPFFARQTRLSFARCGRIDPLSLEDYAEAEGWQGLTRALELGPQAAIETITTSGLRGRGGAGFPTGIKWKTVADAEASQKYIVCNADEGDSGSFADRMLMEGDPYCLIEGMAIAGLCVGATKGFVYIRSEYPDAIRVMEAAIARARSAGHIGPALMGQGPAFDLEVRVGAGAYICGEETSLLNSLEGKRGMVRAKPPLPALEGAFGLPTVVNNVLSLGAVPWILTHGGAAYAEFGLGRSRGTIPLQIAGNVAHGGLFETGFGLSLGTLINDIAGGTASGRPFKAVQVGGPLGAYHGEDDFDLDICYEAFA…	K00124	fdoH; formate dehydrogenase iron-sulfur subunit		21.821	19.0151	22.1444	22.7491	22.0543	22.3808	23.2388	23.3324	23.5339	20.1039	22.1243	22.399	21.6208	22.2776	22.1932	20.9935	22.3947	23.3683	21.5424	22.0306	1.40512	0.283813	0.123127	1.02333	0.291757	0.00235325	0.00681858	0.0136288	0.0037347	0.0151127	1.40122	2.37483	0.548917	1.03705					0.239032	0.0759007	0.678285	0.364575	0.973613	-0.8523	-0.364167
DMKJLJHC_00347 Putative formate dehydrogenase	MRDFIIPTKDMGTPAKTGAPVTVQIDGMAVTVPEGTSVMRAAAEAGISVPKLCATDMLDAYGSCRLCVVEIEGMRGTPASCTTPVREGMVVRTQTEQLGRLRRGVMELYISDHPLDCLTCAANGDCELQDMAGAVGLRDVRYETGENHFETRAGDAPNPSYIARDDSNPYFFYDPEKCIVCMRCVRACEEVQGTFALTTLGRGFDARIGTGTENFLNSDCVSCGACVQACPTATLQEKTVDEIGTPEHSVVTTCAYCGVGCSFEAQMRGDTLVRMVPWKEGKANRGHSCVKGRFAWGYANHGDRILNPMIRDTITDPWREVSWEEALAFAASGIKRAQEKHGRNSVGVITSSRCTNEETYLVQKLARAVMGTNNTDTCARVCHSPTGYGLKQTFGTSAG…	K00123	fdoG; formate dehydrogenase major subunit [EC:1.17.1.9]		20.8638	20.9417	20.8874	20.9255	21.1069	20.9732	21.4187	21.6512	21.7308	19.9066	20.6502	20.8397	21.8501	21.7704	20.9887	20.8976	21.0019	21.6003	20.4655	21.5364	0.0326181	0.076799	0.132401	0.402706	0.388664	0.00220197	0.00259659	0.00400145	0.00177038	0.0107297	0.104223	0.702627	-0.432157	0.638763		+			0.15206	0.00188488	0.204906	0.0814848	0.598403	-0.53638	0.53454
DMKJLJHC_00350 Succinyl-diaminopimelate desuccinylase	MTLDDRLKSEIEHRRDALIALTQALIAIPTLNPPGRNYLEICEYLADHLGARGFTTELIRATGTPGDSERYPRWNMIARIEGTRPGECVHFNAHHDVVELGHGWTRDPFGGEIEGDRIYGRGACDMKGGLAASVIAAEAFLAICPDFAGSIEISATADEETGGYGGVAYLAEQGRFDPDRVQHVIIPEPLHKDQICLGHRGVWWAEIETHGRIAHGSMPFLGDSAIRHMGAVLAEMEETLFPLLLNKRTEMPVIPEGARASTLNINSIHGGEPEQEEGFTGLPAPCVADRCRIVIDRRFLIEEDIGAVKSEISALMERVKERRPSFTYEIRDLFEVQPSMTDREAPIVRSTAAAIEAVLGREASYVVSPGTYDQKHIDRIGRLKNCIAYGPGLLELAHQ…	K01439	dapE; succinyl-diaminopimelate desuccinylase [EC:3.5.1.18]		20.4614	20.3685	20.1933	20.9272	20.5562	20.1748	20.5822	19.7928	20.0175	20.6322	20.9157	20.8415	22.4228	21.9154	21.7802	20.3411	20.5527	20.1308	20.7964	22.0395	0.111169	0.3072	0.33206	0.120037	0.27664	0.00149716	0.00190195	0.00144503	0.00222686	0.0152064	0.211653	-0.210233	0.455367	1.6984			+	+	0.411396	0.443681	0.0170145	0.00128908	-0.421887	0.243713	1.48675
DMKJLJHC_00354 Glutaredoxin 4	MSAQDQIKKQVTENDVVLFMKGTKDMPQCGFSSRVAGVLNFMGVTFQDVNVLADSEIRQGIKDYSDWPTIPQLYVKGEFVGGCDIITEMTLSGELDQLFESKGVTYNKEAAEQIRAANA	K07390	grxD; monothiol glutaredoxin		21.0115	21.1668	20.6517	19.9981	18.8379	19.6606	19.8854	20.4927	19.0904	20.1805	20.097	19.9896	21.7206	21.4996	21.7302	20.9433	19.4989	19.8229	20.089	21.6501	0.215757	0.487237	0.574202	0.0781637	0.106489	0.00227281	0.000916125	0.00116725	0.00136379	0.0116096	-1.44446	-1.12046	-0.854273	0.706797	+		+	+	0.0185621	0.0611173	0.0062348	0.01421	0.324	0.590183	2.15125
DMKJLJHC_00356 Phosphoribosylformylglycinamidine synthase subunit PurL	MDEPQITPDLIQAHGLKPDEYESILEIIGRSPNFTELGIFSAMWNEHCSYKSSKKWLRTLHTEGPQVICGPGENAGIVDIGDNQAVVFKMESHNHPSYIEPHQGAATGVGGILRDVFTMGARPIAAMDSLSFGMPDHPKTSHVVKGVVEGVGSYGNCFGVPNVGGEVRFHPSYNGNCLVNAFAAGLIDADKIFYSAASGIGMPVVYLGAKTGRDGVGGATMASAEFDDTIEDKRPTVQVGDPFTEKCLLEACLELMASGAVISIQDMGAAGLTCSAVEMGDKGGLGIKLNLNAVPQREANMTAYEMMLSESQERMLMVLKPEKEAEARAIFEKWDLDFAIVGETIAEDRFLIVHNDEVKADLPLSKLASTAPEYDRPWVETPAAGPAEDLPSIGPIAAL…	K01952	purL; phosphoribosylformylglycinamidine synthase [EC:6.3.5.3]		26.355	26.2302	26.2687	25.5996	25.326	25.6662	25.2384	25.1842	25.0808	25.5008	26.0421	25.4927	24.3803	22.8875	24.1425	26.2846	25.5306	25.1678	25.6786	23.8034	0.0521727	0.147219	0.0653528	0.257113	0.654871	0.0921431	0.0599358	0.0474404	0.0656685	0.0516454	-0.754057	-1.11686	-0.606093	-2.48121	+	+	+	+	0.00240659	4.62752e-05	0.0308722	0.00591999	-0.362803	0.147963	-1.72716
DMKJLJHC_00358 HTH-type transcriptional regulator CynR	MDWDKLRIFHAVADAGSLTHAGDALHLSQSAVSRQIRALEEGLGTTLFHRHARGLILTEQGELLFEATSSMAKKLESASARIRDSEEEVFGELRVTTATGFGTLWLAPRLTKLYAKYPDLKIDLMLEERVLDLPMREADVAIRMKEPTQADLIRKRLLNIRMRLYATAQYLKSFGTPEKIEDLQNHRMICQTPSTPQVQAGAQLGQQVLAYDQASTLTVNNYFGVLQGVLNHIGIGILPDYLTADFPEIIRVLPDVESVEVPVFLAYPEELRSSRRVTAFRDFIQEEILAYRRFQSERKTED				23.5156	23.4131	23.5796	23.6987	23.5199	23.49	23.6467	23.6571	23.6447	23.6738	23.3149	23.2994	22.3679	22.0622	21.3314	23.5028	23.5695	23.6495	23.4294	21.9205	0.0685502	0.0921553	0.0054298	0.172955	0.434873	0.0133977	0.0153937	0.0165614	0.0138128	0.0140026	0.0667567	0.14674	-0.0733967	-1.58227		+		+	0.457263	0.0392464	0.606647	0.00706691	0.0799833	-0.140153	-1.64902
DMKJLJHC_00359 hypothetical protein	MGRQEISLSDRFDLTKSPVLLNGTQALVRLVLAQTARDKAAGLETAGYVTGYRGSPLGAVDLQMARAKSVLEQSNVLFQPGLNEDLAATALWGAQQAEMRGEGKYDGVFGLWYGKGPGVDRSGDVMRHANMAGSSPHGGVLMAMGDDHTGESSTVLHQSDWAMVDAYMPVLSPAGVQEILDLGLYGYALSRFAGVWVGLKTMKDTVEATAVVDGDPHRLRFETPDFTMPEGGLNIRPGDTPVAQEARMIDYKRFAAEAFARANRIDKRVWGQAGAKIGMVAAGKNWLDLSHALSLLGIDEAEAERLGITTYKVAQTWPLDMTSFHEWAEGLDLIIVVEEKRKLIEVQVKEAIFDDRRGRRVYGWHKGDTWEHGRQVELFPTRYALDPVMIAQKLGDILI…	K04090	E1.2.7.8; indolepyruvate ferredoxin oxidoreductase [EC:1.2.7.8]		23.2908	23.9558	23.8743	27.5504	27.7292	27.3604	27.6442	27.5313	27.6079	27.1771	27.5563	27.7556	24.3834	21.719	25.1797	23.707	27.5466	27.5945	27.4964	23.7607	0.296139	0.150594	0.0470617	0.239956	1.47986	0.0154348	0.242424	0.255071	0.231511	0.0501388	3.83968	3.88754	3.7894	0.0537633	+	+	+		8.20174e-05	5.20562e-05	0.00014849	0.962235	0.0478667	-0.0502733	-3.78591
DMKJLJHC_00361 Glutamate racemase	MAVGVFDSGLGGLTVYDACARRLPDVPFCYFGDNAHAPYGVRDADDIFNLTCAGVERLWDEGCDLVILACNTASAAALRRMQESWIPEGKRVLGVFVPMIEALTERKWGDNSPPREVAVKHVALFATPATVASRAFQRELAFRAIGVDVEAQPCGGLVDAIEDGDEILAEALVKSHVEALKRRMPRPEAAILGCTHYPFMQTIFQQALGADVSVYSQANLVAESLADYLTRHPEFEGPGRESKFLTTGDPASVSSHATQFLRHSIRFDPA	K01776	murI; glutamate racemase [EC:5.1.1.3]		23.0106	22.555	22.5538	22.6075	22.767	22.6991	22.7463	22.8343	22.576	22.878	22.9414	22.7879	21.8906	22.3378	21.6116	22.7065	22.6912	22.7189	22.8691	21.9467	0.215074	0.0653594	0.107225	0.0629775	0.299088	0.00771472	0.00837415	0.00868858	0.00936779	0.014259	-0.01527	0.0124067	0.162677	-0.759787				+	0.928086	0.945304	0.362645	0.0433841	0.0276767	0.177947	-0.744517
DMKJLJHC_00362 N-acetyl-gamma-glutamyl-phosphate reductase	MSSKIAILGASGYTGAELVRLIATHPQMEIVALSGERKAGMAMGDVFPHLRHLDLPGLVKIEDIDFSGVDLAFCALPHATSQAVIKELPRDLKIVDLSADFRLRDPAEYEKWYGQPHAAVEMQKEAVYGLTEFYRDAIRSARLVAGTGCNAAAGQYAIRPLIEAGVIDLDEIILDLKNGVSGAGRSLKENLLHAELSGGTYPYSAGGKHRHLGEFDQEFSALAGRPVLVQFTPHLAPFNRGILATAYVKGAPEAVHEALAARYASERFLEVLPFGALPSTRSVGGSNFVHIGVSGDRIPGRATVAVALDNLCKGSSGQAMQNANLMLGYDETEGLMLAPVFP	K00145	argC; N-acetyl-gamma-glutamyl-phosphate reductase [EC:1.2.1.38]		25.8219	25.8352	25.9185	25.9362	26.0733	26.0914	26.3952	26.5081	26.4229	26.1576	26.2284	26.0553	25.0083	21.4976	21.1929	25.8585	26.0336	26.4421	26.1471	22.5663	0.0427556	0.0693112	0.0480353	0.0710592	1.73123	0.0685772	0.0849398	0.114747	0.0908647	0.0219082	0.175113	0.583557	0.288573	-3.29224	+	+	+		0.0383665	0.00021253	0.00792345	0.0547397	0.408443	0.11346	-3.46735
DMKJLJHC_00370 putative acyl-CoA thioester hydrolase	MHDLSPEGMELTLRTLAMPADTNAAGDIFGGWVMSQMDLAAAIAANERSGGRTVTVAANEIVFKKPVKVGDTLCVYTSVERVGRSSITIAIEAWARRKYTLLREKVTEAHFTMVAVGEDGKPRAIAPDPVTAKSE	K10806	yciA; acyl-CoA thioesterase YciA [EC:3.1.2.-]		19.5785	19.855	19.4831	20.1451	20.5045	20.2493	20.5427	20.7982	20.4072	20.1901	20.7607	21.2802	22.013	21.0656	21.6254	19.6389	20.2997	20.5827	20.7437	21.568	0.157702	0.151008	0.162119	0.445174	0.388908	0.000920195	0.00159594	0.00197651	0.0021469	0.0109672	0.660797	0.943847	1.10482	1.92913	+	+	+	+	0.0128475	0.00412433	0.0297011	0.00288852	0.28305	0.444027	1.26834
DMKJLJHC_00371 Chaperone protein ClpB	MNMEKFTERSRGFLQAAQTIAMREGHQRVVPEHLLKALMDDDQGLSSNLIARAGGDAKRVAEAVDLAVGKLPKVSGGDGQVYVEQSLVRVLDEAEKLAKKASDSFVPVERVLMALAMVNTRAKDALDAGAVSAQKLNGAINDLRKGRTADSASAEDGYEALKKYARDLTEAAEQGKIDPIIGRDEEIRRAMQVLSRRTKNNPVLIGEPGVGKTAIAEGLALRIIDGDVPESLRNKKLLALDMGALIAGAKYRGEFEERLKSILKEIEAAAGEIILFIDEMHTLVGAGKSEGAMDAANLIKPALARGELHCVGATTLDEYRKYVEKDAALARRFQPVMVEEPTVEDTISILRGIKEKYELHHGVRISDSALVAAAQLSHRYITDRFLPDKAIDLVDEAAS…	K03695	clpB; ATP-dependent Clp protease ATP-binding subunit ClpB		23.3321	23.0342	23.0605	24.0132	23.6114	23.9988	24.3024	24.4318	24.3299	23.5949	23.6785	24.0953	21.8265	22.0167	21.2388	23.1423	23.8745	24.3547	23.7896	21.694	0.134664	0.186098	0.0556495	0.21886	0.331125	0.0104355	0.0190173	0.0270016	0.0177304	0.011968	0.732217	1.21244	0.64731	-1.44829	+	+	+	+	0.0107574	0.000298386	0.0235354	0.00459376	0.480227	-0.0849067	-2.18051
DMKJLJHC_00373 Orotidine 5-phosphate decarboxylase	MTSLTSPADDRLIVALDVPNAVQGLELAAKLGDAVSFYKIGLGMLTGGGLALANELKDEHGKRIFLDMKLFDIGATVENAVRGLAQFDLDFLTVHGDPYVVKAAKEGASGRATKILAVTILTSLDRSDLDGALIKPGDIADLVAERAGRALEAGADGVIASPQEAALIRALPQAEGKLIVTPGVRPLGADLGDQKRIATPASAVAAGADHIVVGRPVHRAADPRATAQAIVAELRSPQARRIHG	K01591	pyrF; orotidine-5'-phosphate decarboxylase [EC:4.1.1.23]		23.9458	23.9307	24.0286	23.3202	22.9476	23.5723	23.4842	23.0971	23.3986	23.5017	23.3088	20.066	22.3664	21.0553	20.9657	23.9684	23.28	23.3266	22.2922	21.4625	0.0430323	0.256625	0.166006	1.57611	0.640202	0.0185009	0.0125949	0.0132405	0.00627986	0.0101935	-0.68835	-0.64173	-1.67621	-2.50592	+	+		+	0.0201011	0.00612007	0.20715	0.00524798	0.04662	-0.987857	-1.81757
DMKJLJHC_00377 Modulator of FtsH protease HflK	MNIIDMLGGGDIVMIAIAAFLILCVFLGVRIVPQSQKFVVERFGRLRCVLGPGINFIVPFLDRVPHKISILERQLPNAMQDGITADNVLVKVETSVFYRITEPEKTVYRIRDVDAAIATTVAGIVRSEIGVLELDEVQSNRAQLISKVREQVAAMVDDWGIEVTRAEVLDVNLDEATRAAMLQQLNAERARRATVTEAEGRKRAVELNAEAQLFQAQKEAEARRVSADAEAYATEVVAAAISKNGLEAAQYQVALKQVDAIAKVAMGEGKQTVILPAAALESFTNAFSLLGKK				24.2025	23.9592	24.2274	24.5711	24.6373	24.5917	24.4175	24.5966	24.6276	24.5442	24.5165	24.5434	23.711	22.5696	22.2544	24.1297	24.6	24.5472	24.5347	22.845	0.12099	0.0276331	0.0925808	0.0128903	0.625754	0.0206895	0.0314455	0.0308557	0.029718	0.0265776	0.47036	0.41754	0.405023	-1.28466	+	+	+	+	0.00584674	0.0179027	0.00925636	0.0463692	-0.05282	-0.0653367	-1.75502
DMKJLJHC_00379 Methionine--tRNA ligase	MARHLITSAIPYINGIKHLGNLVGSQLPADLFARYQRARGHEVMFICATDEHGTPAELAASKAGKPVAEYCAEMHEVQARIAEGFRLSFDHFGRSSSEQNRKLTQHFAVQLHNEGLLREVSETQMYSPTDGRFLPDRYIEGTCPNCGFEDARGDQCDNCTKQLDPVDLINPRSVISGATDLEMRETKHLFLRQSTLKDKLDAWISSKADWPLLTTSIAKKWLHDGDGLQDRGITRDLSWGVPAQFEGAPWSGMDGKVFYVWFDAPIEYLAATQEWADKTGGDWARWWRTDRGAEDVTYTQFMGKDNVPFHTIGFPATILGSNEPWKLVDYIKSFNYLNYDGGQFSTSRGRGVFMDQALELLPADYWRWWLLSHAPESADAEFTWENFQVSANKDLADVL…	K01874	MARS; methionyl-tRNA synthetase [EC:6.1.1.10]		27.346	27.325	27.3119	26.393	26.3092	26.3894	26.2216	26.0204	26.007	26.1873	26.3058	26.4101	25.3849	20.8653	22.8912	27.3276	26.3639	26.083	26.3011	23.0472	0.0140627	0.0387211	0.0981724	0.0910155	1.84843	0.189861	0.10679	0.089465	0.1011	0.0305755	-0.963767	-1.24465	-1.02658	-4.28048	+	+	+	+	4.97702e-06	5.92062e-05	9.46043e-05	0.0306487	-0.280883	-0.0628133	-3.31671
DMKJLJHC_00381 50S ribosomal protein L31	MKAETHPDYHTITIKMTDGTEYQTRTTWGAEGDTMTLDIDPTSHPAWNGGSSRLMDTGGRVSKFKNKYAGLGF	K02909	RP-L31; large subunit ribosomal protein L31		20.326	20.357	21.292	19.0525	20.2271	20.7058	19.2992	19.9885	20.3246	19.9639	20.2626	19.2152	21.9857	20.6298	21.2594	20.6583	19.9951	19.8708	19.8139	21.2917	0.448273	0.694629	0.426808	0.440569	0.554026	0.00186542	0.00129224	0.00120668	0.00112697	0.00905545	-0.663233	-0.78756	-0.844467	0.633303					0.319941	0.146336	0.130227	0.277236	-0.124327	-0.181233	1.29654
DMKJLJHC_00382 50S ribosomal protein L19	MNLIAQIEAEQISELGKTIPDFKAGDTVRVGYKVTEGTRSRVQMYEGVCIARKGGDTLAASFTVRKISFGEGVERVFPLYSTNIDSIEVVRRGRVRRAKLYYLRTRRGKSARIAEDTTYKPKAEA	K02884	RP-L19; large subunit ribosomal protein L19		26.7915	26.8069	26.7128	25.6342	25.8161	25.7295	25.9726	26.0885	26.0411	25.3118	25.5385	25.2851	25.6495	24.286	25.0533	26.7704	25.7266	26.0341	25.3785	24.9963	0.0412068	0.0742966	0.0475619	0.113701	0.558093	0.129029	0.0686566	0.0864816	0.0533355	0.118062	-1.04383	-0.736333	-1.39195	-1.77413	+	+	+	+	6.4399e-05	7.81109e-05	8.33682e-05	0.0109606	0.307493	-0.34812	-0.730307
DMKJLJHC_00387 30S ribosomal protein S16	MAMKIRLARGGSKKRPFYSIVACDSRMPRDGRFLEKLGTYNPLLPKDSEERVKMDMERVKYWLEKGAQPTDRIARFLEASGDLEKKSRANMKKAVPGKKATERAEQKAAKEAEAKAASEAPAEEASAE	K02959	RP-S16; small subunit ribosomal protein S16		25.0244	25.2393	25.2054	24.2535	24.2544	24.3374	24.5678	24.5757	24.5456	24.0788	23.9913	23.9382	24.7939	21.436	24.3198	25.1564	24.2818	24.5631	24.0028	23.5166	0.0943585	0.0393638	0.0127368	0.0579597	1.48387	0.0421519	0.0252203	0.0311965	0.0205538	0.0423325	-0.874607	-0.59331	-1.15361	-1.63981	+	+	+		0.000267792	0.000914915	0.000123542	0.193846	0.281297	-0.279003	-0.765203
DMKJLJHC_00390 Signal recognition particle protein	MFESLSERLGGVFDRLTKQGALSPDDVRTALREVRVALLEADVSLPVARQFVKSVEGKATGAAVTKSVTPGQQVVKIVHDELIAMLAGEGPADALKIDNPPAPILMVGLQGSGKTTTTAKLAKRLKDRDGKRVLMASLDTNRPAAMEQLQILGTQIGVDTLPIIKGESAVQIAKRAKQQASFGGYDVYMLDTAGRLHIDEVLMDEVQAVRDIANPRETLLVVDGLTGQDAVNVATEFDEKVGVSGVVLTRMDGDGRGGAALSMRAVTGKPIRFVGLGEKMDALETFEAERIAGRILGMGDIVALVERAQETLEKEQAERMAKRFQKGLFNMNDMKGQLDQMLKMGGMQGVMGMMPGMAKYAKQAEDAGLNDKTITHQIALINSMTKKERANPQLLQASR…	K03106	SRP54; signal recognition particle subunit SRP54 [EC:3.6.5.4]		24.8928	24.9642	25.0307	23.9458	23.5705	23.5368	25.0571	24.8444	24.9566	23.4491	23.2233	23.4002	22.5163	21.9668	21.303	24.9626	23.6844	24.9527	23.3575	21.9287	0.056318	0.185394	0.0868948	0.0969774	0.496093	0.0368533	0.0166693	0.0408692	0.0131418	0.0140825	-1.27819	-0.00988	-1.60504	-3.03386	+		+	+	0.000734848	0.899181	3.51737e-05	0.00100753	1.26831	-0.32685	-1.75567
DMKJLJHC_00391 FMN-dependent NADH-azoreductase	MTKILRIDSSIKGDASITKRLTDKVVHQIDGDVISRDATQIPAIDGAWIGAAYTPADQRSDAQKELLAQSDELIAELKSADVLVIGCGVYNFGVTGPLKAWIDQICRVGETFHYTDAGPEGLAGEKRVIITYASGGVPVGSAFDFATPYIKQVLGFIGIHNVTIVAAEGVALDEAAAIAKAEVQIVELAA	K01118	acpD; FMN-dependent NADH-azoreductase [EC:1.7.1.17]		19.0053	20.9003	21.6529	19.5451	19.2251	20.5565	26.9337	27.045	27.134	20.9387	20.0106	19.6125	21.5134	21.7111	22.5282	20.5195	19.7756	27.0376	20.1873	21.9176	1.11389	0.567449	0.0819327	0.555645	0.439263	0.00169427	0.00110984	0.173383	0.00145987	0.0139743	-0.743907	6.51806	-0.332247	1.39806		+			0.447401	0.00117576	0.724999	0.174032	7.26196	0.41166	2.14197
DMKJLJHC_00392 HTH-type transcriptional regulator DmlR	MMGFDSWDEIRTAFQVARVGTVSGAAEVLGVHHATVIRHVDALEDKLGAKLFQRHPRGYTPTEAGQQLLSVGQATEDQFAQLSARIAGAGEEVSGELIVTSLTSVSVLVLPAMERLLGEYPGLRLSYLTDHRVFRLEYGEAHVAIRAGNRPTEPDNVVQSLGSMQNALYASHAYVERYGVPRSKEELAQHRFVSIDNRESRAPFYRWLSENVPDEQVVFRANDHEAQVAAIKEGLGVGFLTVPMGRGDPKLEEIVKPYDTWNTDLWLVTHVDLHRTPKVQAAVKAIKEQAARSEGLVAH				23.6442	23.9102	24.1145	23.9741	23.9518	24.0707	24.5399	24.5421	24.6777	23.925	24.0073	23.7806	21.6577	22.312	21.2253	23.8896	23.9989	24.5866	23.9043	21.7317	0.192563	0.0516047	0.0644337	0.0937002	0.44674	0.0175182	0.0207297	0.0317088	0.0191974	0.0122848	0.109247	0.696927	0.01464	-2.15796		+		+	0.481615	0.00831633	0.927631	0.00329569	0.58768	-0.0946067	-2.26721
DMKJLJHC_00396 Glucans biosynthesis protein G	MSSSRSVRKAHPSRRAFLGAGTALGLLAATGVPVRAQDSAQPAPAAPATPPAAEPAAPAAPQKTPFSFDALSAEMQNEAKGDPVPPATSDADFLSKLTYDTYRLIRYNPDKAIFSDIKNSLFQLQAFHLGWLFKEPVQMFSVEDGQATPMIFNTDDFIYEREARKIVPEHADLPGVAGFRLHNPINRPDVMDELAAFQGASYFRALGRGSAYGLSARGLAVNTGLAVAEEFPRFTRFWIETPTPGSDTITVYAAMNSASLTGAYRFVITPGDATAMDVTARLYIRADIQQLGVAPLTSMYLYGPRNRSDFDDYRPKVHDSDGLGIEQGDGDLIWRPLQNPGKIASSYFSQNAPHSFGLYQRDRNFDDYQDASAHYERRPSARVTPASDWGKGMVRLVEI…	K03670	mdoG; periplasmic glucans biosynthesis protein		25.997	25.7526	25.9749	25.4739	25.6891	25.4703	25.8597	25.9746	25.8306	25.5274	25.436	25.4882	25.324	21.3072	20.8128	25.9082	25.5444	25.8883	25.4839	22.4813	0.110353	0.102288	0.0621551	0.0374283	2.0202	0.0709797	0.0605132	0.0781699	0.0573794	0.0206554	-0.363753	-0.0198933	-0.42429	-3.42686	+		+		0.0268092	0.835094	0.00674775	0.0747321	0.34386	-0.0605367	-3.06311
DMKJLJHC_00397 Na(+)/H(+) antiporter subunit A	MSPALIAALPFLGAALPSLLIRTGRNNAAGVSAVITGLALLGLLLHLPTILAGGVVETRIDWLPWLGLNLNFWIDGLGMLFATMILGIGLLVILYARYYLSNKDPVGQFYTYLLLFQGAMVGIVLSDNILLLLVFWELTSLTSFLLIGYWKHLPAGRQGARMALTVTGLGGLSMIAGMLILGQIAGSYDISEILRHKDAIQASPLYIPALLLILGGAFTKSAQFPFHFWLPHAMAAPTPVSAYLHSATMVKAGLFLMARLWPVLSGTPEWFYIVSTVGLITMLIAAYIAIFKHDMKALLAFSTVSHLGLITFMLGLGTQAGALAAVFHIINHATFKAALFMSAGIVDHEAGTRDLTRVGGLRKLMPITFAISTIAALSMAGIPFFNGFLSKEMMLEAAA…	K05559	phaA; multicomponent K+:H+ antiporter subunit A		22.6466	22.839	22.3701	23.2026	22.263	23.0644	22.4424	22.8979	20.0289	22.8402	23.1256	23.1923	22.2967	21.132	21.7559	22.6186	22.8433	21.7897	23.0527	21.7282	0.19242	0.414218	1.25889	0.152703	0.475874	0.00725873	0.0093056	0.00456303	0.0106388	0.0122552	0.224783	-0.828827	0.434133	-0.89037					0.524741	0.409451	0.0668148	0.0702126	-1.05361	0.20935	-1.11515
DMKJLJHC_00399 Na(+)/H(+) antiporter subunit D	MMEHWIIAPVVLPAILAPLIVLWMRYDLVTQRVASVVGMLALLTLAIALLVSASGNPPEVYRLGGWEPPYGIVLVLDRLSALMLLLNAILGLVVVLYAIGSGWDRRGWHFHSLMQFQMMGINGAFLTGDAFNLFVFFEVLLIASYGLMIHSGGKARLKSGVQYVVYNLAGSTLFLFALGTIYAVAGTLSMADLATKVAQMPAGDSALIRVGAVLLLLVFAVKAALVPLQFWLPATYSNAPGPVAALFAIMTKVGVYAIVRVYTLIFPITGTTDTLIHDILVPAACVTLVVGMVGVFGARDMGRAVTYAVIGSIGTMVLAFSQFTQGATSAGLYYMVHSTLAAAALFLIADLVRERRGRWGLALRDAPLMHNHGLLAALFFVAAIAMAGMPPLSGFLGKL…	K05561	phaD; multicomponent K+:H+ antiporter subunit D		21.7047	21.8602	21.6106	19.9725	21.8643	20.2099	19.5886	20.7823	19.9613	22.1685	21.8596	22.2023	22.1244	22.0375	20.9419	21.7252	20.6823	20.1107	22.0768	21.7013	0.102907	0.841436	0.498689	0.154179	0.538138	0.0039077	0.00208062	0.00142501	0.00540899	0.012029	-1.04291	-1.61445	0.35162	-0.02386		+			0.156863	0.0109571	0.0550801	0.953846	-0.571543	1.39453	1.01905
DMKJLJHC_00403 Lipid A export ATP-binding/permease protein MsbA	MTDETVETTPGRLGALKGLLNNSLISRLLREGMNEQGWLYAIAIFAMLVVALTSAATAWVMQRIIDALGHPENHAGVAMVSITVMVIFTVKGIANYTQVVFMSRAGNRIVARQQIRLYQKLMRQGVGFFNINESSDLLMRVTQSAQAARSLIEVVVTSMVRDLLTLFGLICVMVYQQPLLSSVMLIIGPLTMIGLRYILRHVRVIMEKEMASLSEIIKVIQETSGGIQIIKIFSLEKRMNRRMEGAVKQVETRSNAVARLEAITSPLMETLSGFAIAGVVYLSAFGAFGSEATTPGQLMSFVTALLMAYEPAKRLSRMRVTIESKMVGVRIMFELLDQPETISEAENATILPPGPGKMEMRNLGFAYAKDKRVLRDVNLTFEPGKTTALVGPSGAGKST…	K06147	ABCB-BAC; ATP-binding cassette, subfamily B, bacterial		22.5015	22.4882	22.3433	22.2346	22.4262	21.79	21.7261	21.6263	20.0874	22.1612	22.4422	22.4401	21.2602	22.3878	20.9791	22.4443	22.1503	21.1466	22.3478	21.5424	0.0716617	0.266506	0.750051	0.131998	0.608748	0.00643295	0.00575588	0.00292175	0.00652692	0.0107742	-0.294043	-1.29775	-0.0964967	-0.901947					0.206331	0.0715315	0.414959	0.105905	-1.00371	0.197547	-0.607903
DMKJLJHC_00404 Tryptophan synthase alpha chain	MTRIDAKFAALKAEGKKAFVSYIMAGDPDLERSLAVMKGLPGAGVDIIELGVPFTDPMADGATIQLAGQRALDGGQTLRKTLEMAAAFRESDDTTPIVLMGYYNPIYSHGVEAFLADAKAAGIDGLIVVDLPPEEDDELCIPAQAAGINFIRLATPTTDDARLPKVLQNTSGFVYYVSVTGITGSQAAQAAEVGPEVSRIKSQTDLPVVVGFGINTPEAARTIAGVADGCVVGSAIVQQIASGKSRDDVLAFVAGLASGAHSA	K01695	trpA; tryptophan synthase alpha chain [EC:4.2.1.20]		25.0741	25.0186	24.9905	24.7722	24.5811	24.5734	25.084	25.1994	24.8972	24.8867	25.192	24.8469	25.0819	21.9731	22.4839	25.0277	24.6422	25.0602	24.9752	23.1796	0.0347102	0.0919748	0.124543	0.154175	1.36119	0.0385557	0.032379	0.0440313	0.0403306	0.0335157	-0.385483	0.0324867	-0.0524867	-1.84808	+				0.00517203	0.740274	0.663036	0.127352	0.41797	0.332997	-1.4626
DMKJLJHC_00405 Ribosome-binding ATPase YchF	MGFKMGIVGLPNVGKSTLFNALTKTAAAQAANFPFCTIEPNVGEVAVPDARLEALAAIAGSKEIIPTRMTFVDIAGLVKGASKGEGLGNQFLANIRETDAIAHVLRCFEDDDVTHVEGRVEPVADAETIETELMIADLESLEKRIANLARKIKSGDKEAKDAVRLLEQAKEALEAGRPARTIEVAEEDRKAWAMLQLLTAKPVLYVCNVEEANAAKGNSKSDAVAKMAAAQGAGTVVISAKIEEEISQLDADEAEMFLDEMGLEEAGLDRLIRAGYELLGLQTYFTVGPKEARAWTIRHGTLAPAAAGVIHGDFERGFIRAETIAYDDYIAGKGEAGAKEAGKFRVEGKTYEVKDGDVLHFLFNS	K06942	ychF; ribosome-binding ATPase		25.8641	25.7303	25.615	25.2207	25.123	24.953	24.5609	24.7609	24.6976	24.9115	24.8773	24.7222	24.2782	22.4557	22.3252	25.7365	25.0989	24.6731	24.837	23.0197	0.101826	0.110642	0.0834823	0.0823555	0.891523	0.0630146	0.044436	0.03367	0.036645	0.0299986	-0.637557	-1.06332	-0.899487	-2.71677	+	+	+	+	0.00389133	0.000335379	0.000628932	0.0128299	-0.425767	-0.26193	-2.07921
DMKJLJHC_00408 Putative acyl-CoA dehydrogenase AidB	MTTPAPRSDLPTHLVENQPPARGDIDLWQNDVALREAVARAEGRSAPLAEYGAHLGLAESRDAAHEANRHSPELVLFDAGGRRLDEVRFHPAYHRSLKAGITAGYSAVAWEGKPGGHATHAAMVYLNSQVEPGSCCPMTMSYAAFPALSATPALAELWQPKLISRSYDPRILPMSEKTGVTLGMAMTEKQGGSDVRANTTRAERAGDHYRLTGHKWFCSAPMSDGFLTLAQTDEGLSCFLVPRWLEDGRNPIRIQRLKDKLGNRSNASAEIEYEGALAYLLGEPGRGVATIIEMVTHTRLDTAMAPAGLMRAALCEAHHWVSHRAAFQRRLIDQPLMRAVLADLALDWEGALALGMRVAQAFDGANAEDRAFARIGVALAKYLGNKRCPQVTYEAMECL…	K09456	aidB; putative acyl-CoA dehydrogenase		22.3933	22.6527	22.8228	23.2177	23.0305	23.2466	23.5796	23.5226	23.1753	23.0364	23.3324	22.9752	21.9484	21.9522	21.9742	22.6229	23.165	23.4259	23.1147	21.9582	0.176629	0.0957729	0.178657	0.155976	0.0113764	0.0072808	0.0116294	0.0141832	0.0111056	0.0143739	0.542013	0.80291	0.491707	-0.664693	+	+	+	+	0.018859	0.0106606	0.0419269	0.00604217	0.260897	-0.0503067	-1.20671
DMKJLJHC_00410 General stress protein 69	MRKIELGSSGIEVSEICLGSMTWGTQNTEAEGHAQIDMALDHGIDFIDTAEMYPVNPVSAETLGATETIIGTYLAKRGKRDDLVIATKLTGEGSHAIEGGVPISPERIRAGVDASLKRLQTDYIDFYQFHWPNRGSYHFRKAWRFDPSTQPPRAEVEADMQACLETLQELIDAGKIRHAGLSNETAWGTSEWLRLAKAGAGPRMQTIQNEYSLMCRYFDLDLAELCHHERVTLLAYSPLAAGILTGKYSGDVTPPLSRRSYVASLGGRANPRAFDIADAYIAQAREFDLNPITMAIAWVMSRPFPVIPIIGATSLEQLKPNLDAAGVTLPKELLDKIAVLHHDMPTPY				26.743	26.7677	26.6655	25.7506	26.02	25.9934	25.6875	25.7128	25.6293	25.8827	25.8814	25.7689	25.8517	21.2458	24.3372	26.7254	25.9213	25.6765	25.8443	23.8116	0.0435794	0.121196	0.0349673	0.0533445	1.91672	0.125068	0.0785796	0.0674976	0.073663	0.0519372	-0.804087	-1.04891	-0.88112	-2.91385	+	+	+		0.000908219	1.19641e-05	5.49023e-05	0.098051	-0.24482	-0.0770333	-2.10977
DMKJLJHC_00416 hypothetical protein	MTFMNRQTIAAVLLASSSLVLSVPAFAQDSATGDAQSQTSTPSPAPGMPGGKLFGFDRTGLDTNGDGKISLAEIQAKRAAEAKSLDANGDGKISEQELMDFEMAKAKTRIEARVKARFAARDLNGDGELSAAELMVHPLPTRVFERMDRDGDGALSPEEIKAARKMMHERMGKYGHHHGKMDRKHHGKMEHHGKMGGKMGGQMDGQDGGMATPPAPPAPQN				20.4033	19.9805	20.8273	21.2908	21.1823	21.0496	22.1831	21.8368	21.6589	21.0021	21.1476	21.5856	21.386	22.4619	22.0163	20.4037	21.1742	21.8929	21.2451	21.9547	0.345705	0.0986382	0.21763	0.247963	0.44141	0.00156359	0.00292611	0.00490141	0.00303914	0.014339	0.770523	1.48923	0.84138	1.55103	+	+	+	+	0.0387388	0.00671821	0.0489681	0.0173611	0.71871	0.0708567	0.780503
DMKJLJHC_00423 hypothetical protein	MGDRVQHVIIGLLAGLFFWALQSDSFGGLSLSPRAVFGLGVAGVAFFGACLAMLGEIGLRRAALGAAGIAIAPSVLGWWAAGALDPARSVAAQMPAGVLALFVLGAVPIPFAVAYVQEGRRCLGNYPVLFAQSWMIVVRYGAAWLFVALVWLLLYLSSELLESVGINLLKELFRNTALALGLSGAILGLAMAVVTEREDMISPFLLLRLLRLLLPVVLVVVVVFLIGLALRLGREGVPGLSIGQTLIAMALAAITMISVAVERDDSEAVATRLLRNAAKALAVVLPVLVAVAVWSLAHRVAQIGWTPALVGQTVVLCALAGYGLGYGGSVLTGRGWMARIRRVNIAMAGGLIAAAVLWLTPLIDANTIAAQSQLARYAAGQVPASRLPLYRMGRDWGRP…				20.1444	20.376	20.5169	21.1071	20.9227	21.2039	20.9307	20.8648	19.8531	20.769	20.7316	20.6857	22.1993	21.6733	22.0856	20.3458	21.0779	20.5495	20.7288	21.9861	0.153555	0.116617	0.493179	0.0340835	0.226003	0.00150207	0.0027371	0.00193157	0.00212485	0.0146538	0.7321	0.203723	0.382993	1.64028	+		+	+	0.00580899	0.606739	0.0262097	0.0010554	-0.528377	-0.349107	0.908177
DMKJLJHC_00430 Lysine--tRNA ligase	MTSFRDAAMNSKAWPFEEARRLLKRYEKKDPEKGYVLFETGYGPSGLPHIGTFGEVARTTMIRRAFEAISDIPTRLICFSDDMDGMRKVPGNVPNQDMLRTHEQKPLTSVPDPFGEFESFGDHNNAMLRRFLDTFGFEYEFASATEYYKSGKFDAMLLRAAEKYDEIMAIMLKSLREERQQTYSCFLPIHPETGRVLYVPMKEVNAKDGTVTFDDEDGREWTLPVTGGNVKLQWKPDFGMRWAALDVDFEMYGKDHSTNTPIYDGICRVLGGRAPEHFTYELFLDANGEKISKSKGNGLSIDEWLTYASTESLSYFMYLKPKTAKRMHFDVIPKAVDEYHQQLRAYPDQDADKQANNPVWHIHGGKVPESRMVVPFSMLLNLASVAGATDKDGLWGFIK…	K04566	lysK; lysyl-tRNA synthetase, class I [EC:6.1.1.6]		25.9618	26.0069	26.0088	24.6807	24.7332	24.5452	24.8341	24.1734	24.7401	24.7453	24.7839	24.9767	23.8078	21.7677	24.6655	25.9925	24.653	24.5825	24.8353	23.4137	0.0217085	0.079223	0.291841	0.101214	1.21542	0.0752518	0.0326221	0.0316209	0.0366028	0.039419	-1.33947	-1.40995	-1.15719	-2.57881	+	+	+	+	2.09518e-05	0.00242508	9.35415e-05	0.0399368	-0.0704767	0.182283	-1.23934
DMKJLJHC_00431 hypothetical protein	MNVAITQGLDLTPPAFKDGLDQWSSENGTPGSTTYANAINAAFVPADADFGGCMELIKTQSTQKVRAMVRTPILPGTYLRISARIKALSGNLPSVRAAGYAVKSNNAHVGGLVETGPTVALQSYGEVVEVSAIVGAGNRTGVDMPWGLGPDYGYLGIDLTGANGGVVRIDDIQVEDVTDAFLREMLEWVDVRDFGAIGDGVTDDRAAFVAADQAADGRTIMVSEGHYRIGSSLSLKAPVRFVGTLTMPVAASLALLASFDFPTYADAFGDEEAGFKKALQALFGYTDHNVLDLRGRRVEITAPIRISEIAPDLSTFSNRRILQNGQLNVIEGSAWNDEVVTSQATYAIAQPLQMTNVANIANIPVGAHVTGSGVGREVYVTSKNVGAGTLYLSQPLYGG…				21.1893	20.0535	19.6928	20.2907	20.4038	20.6104	21.9048	20.8318	20.2794	20.2065	20.2796	20.568	21.4849	21.3306	21.6718	20.3118	20.435	21.0053	20.3514	21.4958	0.637671	0.132377	0.674805	0.156089	0.139506	0.00146714	0.00175289	0.00264926	0.00163572	0.0104317	0.12313	0.693487	0.0395	1.18392					0.802401	0.35039	0.936278	0.0623074	0.570357	-0.08363	1.06079
DMKJLJHC_00432 Acetyl-coenzyme A synthetase	MTAQDQAHHIPAKKDIPEGFENAHADAAKYREMYRESMEDPEGFWAREGKRLDWITPYTKVKNTDFTYGNVSIKWFEDGVLNASVNCVDRHLATRADQTAIIFEPDSPDAPAQHITYRELSEKVNRFANVLLSQGVMRGDRVVIYLPMIPEAAYAMLACTRIGAVHSIVFAGFSPDALANRINDSGAKLVITADGAPRGGRSTALKANADKALLHCSDKVRCLVVKHTGDQTTWVEGRDVDVKALMETASPDCPPRPMNAEDPLFILYTSGSTGKPKGVVHTTGGYLVYAAMTHQYTFDYHDGDVFWCTADVGWVTGHSYIVYGPLANGATTLMFEGVPTYPDAGRFWAVCEKHKVNQFYTAPTAIRALMGQGAEWVEKYDLSSLKVLGTVGEPINPEA…	K01895	ACSS; acetyl-CoA synthetase [EC:6.2.1.1]		28.105	28.187	27.9722	27.4359	27.2764	28.3305	26.0524	26.3378	25.7248	28.2684	27.4982	27.633	28.2108	22.0048	27.259	28.0881	27.681	26.0383	27.7998	25.8249	0.0884986	0.463911	0.25049	0.335853	2.72898	0.32163	0.266079	0.0867379	0.285711	0.209671	-0.407143	-2.04977	-0.28826	-2.26325		+			0.289755	0.000400563	0.305614	0.30615	-1.64262	0.118883	-1.85611
DMKJLJHC_00434 hypothetical protein	MADTSSSNAYWKANIRMIQISLVIWFVVSFGFGILLRPMLSGIKFGGTDLSFWFAQQGSILVFLVLIFVYAWRMNKLDREYGVEE				21.2355	21.1353	20.9603	20.9302	20.8514	22.4407	20.4744	20.655	20.3656	22.9446	21.4024	21.3365	22.0384	21.6273	21.2271	21.1104	21.4074	20.4983	21.8945	21.6309	0.113723	0.731337	0.119353	0.743015	0.331209	0.00255189	0.00343942	0.00186424	0.00476699	0.0114562	0.297003	-0.612077	0.784097	0.52052		+			0.600706	0.00629452	0.214179	0.10341	-0.90908	0.487093	0.223517
DMKJLJHC_00435 Cation/acetate symporter ActP	MDQFTLNLLVVGATFVLYIGIAIWARAGSTSEFYAAGRGVHPVVNGMATGADWMSAASFISMAGIIAFGGYDTSAYLMGWTGGYVLLAMLLAPYLRKFGKYTVPEFIGDRFYSQTARTVAVICLIVASITYVIGQMTGVGVAFSRFLEVDNTTGLFIGAAIVFLYAVLGGMKGITYTQVAQYIVLIIAYTIPAIFIALQLTGNPIPALGLFSTDTSTSQPLLSTLNGLVTDLGFQSYTGQHDTTLNLFLFTMTLMIGTAGLPHVIVRFFTVPKVADARSSAGWALVFIALLYLTAPAVGAMARLNLINTFYPEGVSQPAIELSAIDNDANLAWVRNWAKTGLLTFDDKNGDGRIEYNAYNDPTDGKPANELTVNRDIITLANPEIANLPGWVIALVAAG…	K14393	actP; cation/acetate symporter		25.9032	25.9532	25.9639	25.8719	25.7309	26.9024	23.8847	24.4903	23.5126	27.0821	26.2028	26.2997	25.6251	22.0624	23.2415	25.9401	26.1684	23.9625	26.5282	23.643	0.0264617	0.52221	0.402916	0.393659	1.48191	0.0725661	0.0932584	0.0205743	0.118341	0.0462098	0.22834	-1.97755	0.58816	-2.29708		+			0.570275	0.00228092	0.102699	0.0935043	-2.20589	0.35982	-2.52542
DMKJLJHC_00436 Hypoxic response protein 1	MSADPTPILAFLETVHPYDTLPRNELEAVASSFRRREVKAGACIYTYGRPLEGIYLIERGAVEITDSNGALVSILGPRNTFGERGLMRDGLAATRATASAETVLLVLPPEPFRALLHDVPSFARFFNRARSSEPRSPSITTMKIADLMTRKPISCAPDATVAEAARLMRDQQISSLVVIGADGALRGILTQRDLTNKVLAEGRLPETQVQAVMTADPVTLGPDALGSDLLNVMLEKRIGHLPIMDQGRFVGMVTQTDLTRFQAVSSAVLIRDVAGAVDVADMAAVTARIPQLLMQLVGGHHTHEVVTRLITDIADAVTRRLLAMAEAELGAPPVPYLWMACGSQGRREQTGVSDQDNCLILDDAVRAQDMDYFHALARLVSDGLNACGYVYCPGNMMAT…	K07182	CBS domain-containing protein		23.6294	24.0441	23.9267	23.7837	23.4434	24.7076	23.9131	23.1712	23.3346	24.724	24.059	23.9583	21.9238	22.9709	21.719	23.8667	23.9782	23.4729	24.2471	22.2046	0.174506	0.53413	0.318284	0.339695	0.548285	0.0172425	0.0204353	0.0146536	0.0243469	0.0170501	0.11149	-0.393813	0.380347	-1.66217				+	0.792935	0.199735	0.231768	0.0150321	-0.505303	0.268857	-1.77366
DMKJLJHC_00439 DNA polymerase III PolC-type	MSGARFSLRLRVLLLFAALAVGVLAALAGGLILGYTREPAPDLRSPMLAGGIAAGFVSLGLIAGLWLFFDTHLVKPVERLAGLLRAHGAADAGAQIETRDAPFLGDLTPAAGAMAQTLSETRHALNTVVARETTRLAEEKERLEALLADVPVGVLLCTAEHQIAFYNGAAVDLLGSAHAPGLDRRVFEYLTAGPISHAYERLGMTQDPEAATDLLCATVDGGLVLAARMRRLAVPQDAQAGGHPGYVLTLRDVSGDMASHHARTQLIDELFERIRRPAAALQSLIDVLTGPDEAGTDPARAPIQVAARSEARQLSDAIHDVFARHEATRADWWPLSMIRASDLGQAVAARVEAEGGALLPVSAALMLRCEGFELVALLANLARHLRPRDNLRLEIMQEG…	K02342	dnaQ; DNA polymerase III subunit epsilon [EC:2.7.7.7]		21.435	21.5829	21.4008	21.0475	20.2352	22.2795	19.6101	19.9593	20.0163	22.5248	21.7645	21.3472	21.3668	21.3644	21.6149	21.4729	21.1874	19.8619	21.8788	21.4487	0.0790497	0.840409	0.179551	0.487496	0.117535	0.0032808	0.00295289	0.00119928	0.0047155	0.0100968	-0.285517	-1.61098	0.405947	-0.0241967		+			0.657374	0.000314191	0.309678	0.820981	-1.32547	0.691463	0.26132
DMKJLJHC_00441 putative FAD-linked oxidoreductase	MEMPDPKAAILARKPEIVARLRDVLPADAVIDDPAETRAYECDALSAYRCQPLVVVLPRSTAEVAAALSLLHEMGVPVVPRGAGTSLAGGSMPQADSVVLGLARMNAVLETDYTNRLIRVQAGRTNLSVTGAVESDGWFYAPDPSSQLACAISGNIAMNSGGAHCLKYGVTTNNLLGVTLVTMAGEVIEIGGTGSLDAPGLDLLGLVCGSEGQLGVVTEATLKILPKPEGARPVLIGFSANEIAGACVADIIRAGILPVAIEFMDRPCIRATEAFCGAGYPDCAALLIVECEGSAAEIDEQIGLIREIAARHDPVEFREAQSPEEAARIWLGRKSAFGAMGQLGDYMCLDGTIPVSELPHVLRGIEALSAQYGLEVANVFHAGDGNMHPLILYDANAPG…	K00104	glcD; glycolate oxidase [EC:1.1.3.15]		21.8108	21.6704	22.1016	21.0117	20.9205	21.3513	20.811	20.989	20.9972	21.7487	20.1748	20.0077	21.6746	21.8487	22.3614	21.8609	21.0945	20.9324	20.6438	21.9616	0.179587	0.185371	0.0859027	0.784321	0.291499	0.0042933	0.00276882	0.00251871	0.00200322	0.0144071	-0.766417	-0.9285	-1.21718	0.100643	+	+			0.0137013	0.00273681	0.0991608	0.698954	-0.162083	-0.450767	0.86706
DMKJLJHC_00443 Lactate utilization protein A	MQTNFTPEQLEDPGIARSNSILRACVHCGFCTATCPSYQVLGDELDSPRGRIYLIKDMLENDRPADAKTVKHLDRCLSCLACVSTCPSGVDYMHLIDHARAHVEKTYKRPLMDRLLRATLARILPYPGRFRLAMGGAKLARPFARFLPDRRLRAMLEMAPKVIPPVSRNDDPQVFAPEGRKRYRVALQTGCAQRALNTDINDATIRLLRRLGCEVVIPKGLGCCGALAHHMGREGESHAQALANIRAYLAEPELDAVIINTSGCGTTVKDYGEMLRHGPHAQEAAKVAELACDISEFVARIGLPERQNPKAEPGALRVAYHAACSLQHGQQIKAAPKDLLRQAGFEVVEPADSHLCCGSAGTYNLLQPEIAQELRKRKVATLEAKAPQVIAAGNIGCMM…	K11473	glcF; glycolate oxidase iron-sulfur subunit		21.0548	20.7946	20.9484	20.987	20.5787	20.8708	20.45	20.8376	20.6923	20.9308	20.7019	20.7506	22.9692	20.726	20.9608	20.9326	20.8122	20.66	20.7944	21.552	0.106812	0.171761	0.159881	0.0984958	1.00669	0.00225599	0.0022767	0.00208524	0.00222376	0.0108464	-0.120417	-0.27265	-0.13818	0.619407					0.447213	0.115409	0.24983	0.43569	-0.152233	-0.0177633	0.739823
DMKJLJHC_00447 Aspartate-semialdehyde dehydrogenase 2	MGYKVVVAGATGNVGREMLNILAERQFPVDELVALASRRSLGTEVSFGDKTLKTKDLEGFDFTGYDIALFAIGSDATKKYAPIAASQGCVVIDNSSLYRYDPDVPLVVPEVNPEAVDGYTKKNIIANPNCSTAQMVVALKPLHDRARIKRVVVSTYQSVSGSGKAAIDELWNQTKGMYVPGQEVEPSVYPKQIAFNVIPHIDVFLDDGSTKEEWKMVAETKKIVDKSIKLTATCVRVPVFVGHAESINIEFEEFLDEDEARDILREAPGIMVIDKREDGGYITPVECVGDFATFISRIRQDSTIENGLNLWCVSDNLRKGAALNAVQIAETLGNRCLKKG	K00133	asd; aspartate-semialdehyde dehydrogenase [EC:1.2.1.11]		27.2507	27.0396	27.219	26.3735	26.5576	26.5891	26.4473	26.792	26.642	26.6615	26.7918	26.7691	26.2651	23.5315	24.6095	27.1698	26.5067	26.6271	26.7408	24.802	0.0929611	0.0950716	0.141127	0.0568222	1.12425	0.170179	0.117904	0.13045	0.137129	0.103188	-0.66304	-0.54266	-0.42894	-2.36775	+	+	+	+	0.0021322	0.0104873	0.00509773	0.0412137	0.12038	0.2341	-1.70471
DMKJLJHC_00448 hypothetical protein	MTRLGFLIARSLRREAPLAALSVSQDALLAELRGKSVALVGNARALAKTTQGAQIDAHDVVIRINRAPMPNAQSHGTRTDWLGLATRLPQADRSRIAPARILWMSHKRKRLDWQSATSPGFYLHPLSAYHALKSRLGAQPTTGAMLIDMLAGSALARLDLYGFDFFASRSLSGSRSAENVPHDFAAEAQMVEALIARDSRIIRN			K08309	21.6137	21.6628	21.735	20.9947	21.5203	19.4812	20.484	19.5203	21.5155	21.2826	21.1194	19.9966	21.5788	22.1944	21.4206	21.6705	20.6654	20.5066	20.7996	21.7313	0.0498227	0.864408	0.814669	0.571645	0.333769	0.00376239	0.00205648	0.00187495	0.00223168	0.0122813	-1.00507	-1.1639	-0.87094	0.0607667					0.176013	0.113927	0.0983659	0.811547	-0.15883	0.13413	1.06584
DMKJLJHC_00449 D-inositol 3-phosphate glycosyltransferase	MKQIDVIAPNLKRRLSGVTATVVRLVPLQARMIGIVATGPGLPEHLPHVPVWRLPFLPRRTRVWHARRNTEMLLGLVLRDLLRMRLRLLFTSASQRQHSGYTKWLIGKMDRIVATSSRTASYLEREADVILHGIDTQSFTPPPDRKALRAQLGLPTKGLLVGCYGRIRAQKGTDAFVDAMIAALPSRPGVTAVVMGRAVGEHARFLGGLKEKVAQAGLAGRILFQPEVDVDQMADWYRVLDLYVAPQRWEGFGLTPIEAMACGVPVVATRVGAFEEIVTPETGALVAPGKPQALAEAAAMFLDDPDRLDAAREAARLRAQSAFAIEREAEALVAIYREMLA	K12989	lpcC; mannosyltransferase [EC:2.4.1.-]		22.3723	22.0577	22.2218	21.7267	20.8059	21.7501	19.4182	20.6588	19.9239	22.5006	21.8936	20.4013	21.6196	21.9055	21.9485	22.2173	21.4276	20.0003	21.5985	21.8245	0.128488	0.439712	0.50934	0.882051	0.145936	0.0054962	0.00348786	0.00132003	0.00388265	0.0131014	-0.78969	-2.21696	-0.61881	-0.392763		+		+	0.0713719	0.00395801	0.38179	0.0460835	-1.42727	0.17088	0.396927
DMKJLJHC_00452 hypothetical protein	MRITLTAALFLGACPALADTIEAPATISSVTLFPQGAQVVRQVQITGPSGTNEVLVPGLPKGTDISSLRVSGDGVSVGAVSLIDGRAPALAKVDSAPIKAARERLAQAREALANAKDQVAAIEAKAQAARDQITFLKGAGTQVSDPSQLQAIAQVVGDQILAASERAIAAEADARRAREALDPQEKAVKQAQAALDALENPAKDHDVLRAMVQGSGTLTITSFVDNAGWQPTYDLRLDRAAGKLDMTRYVSVHQSSGEDWRDVDLTLSTARPGAQSAPSEVYPRQVSSGPPRPVMPLAKSNARVADMAGAPAPMMEAAFSGTAELQMQGETVTYHYPSKVDLRDGVDDLRLKLDDKVLPVEVIAEAAPLSDPQAYRVAEGKNATGEILLPGPATLFVGG…				26.527	26.5431	26.3509	26.6939	26.6607	26.7007	27.5655	27.3831	27.4329	26.4535	26.7993	26.8327	27.457	21.1249	26.0928	26.4736	26.6851	27.4605	26.6952	24.8916	0.0870778	0.0174681	0.0769771	0.171416	2.72102	0.10504	0.133422	0.232449	0.132859	0.109798	0.211457	0.98687	0.221537	-1.58207	+	+			0.028118	0.000275688	0.178536	0.457331	0.775413	0.01008	-1.79353
DMKJLJHC_00454 Carbonic anhydrase 1	MREHVKPLPTYLVSRYQGWHATSYAENRAWYRRLADEGQRPRSMIIACCDSRVHVSSMFGADQGEFFIHRNIANLVPAFTPDGDHHGTSAAVEYAVQSLKVAHLIVLGHSNCGGVAGCHAMCAGQAPDLEEKSSFTGTWLNILRPGYERVLERAPADPVTELEREAVKVSLENLMTFPFVREALDAERMTLHGLRHEIGEGTLEQYVSSSDQFEPL	K01673	cynT; carbonic anhydrase [EC:4.2.1.1]		25.8405	25.9725	25.8934	25.3614	25.5001	25.4416	25.8045	25.6806	25.7409	25.5805	25.4277	25.5319	21.1744	21.074	21.6561	25.9021	25.4343	25.742	25.5134	21.3015	0.0542707	0.0568623	0.0505961	0.0637475	0.254066	0.0706833	0.0560679	0.0706312	0.0585634	0.00911731	-0.467793	-0.160163	-0.388787	-4.60067	+	+	+	+	0.00109107	0.0379268	0.00278131	1.5092e-05	0.30763	0.0790067	-4.13287
DMKJLJHC_00456 Peptidase B	MPDFEFLAARPEMRFAEAGGASRLLHLVSPDTLAARLDALPKAQADFAKAQGFGAGAGALCLLPGPEGVAAALLGVGDAQARSRDRFALAKAVPLLAEGAWALADIPPDLDLHALCLGWLLAGYRFERYAKSAPPKARLVCPEGVDRAQLEAMAEAEALTRDLINTPASDMSPDALEAAVHLLAKRHEAQVSVIAGEDLLAQNFPMIHAVGRAAASAPRLIDLRWGDAGPALTLVGKGVCFDTGGLNLKPGASMGLMKKDMGGAATVLGLAHMIMQTGAKIRLRVLIPAVENAVAGNSFRPGDILRSRKGLSVEVNNTDAEGRLVLADALALADEDKPDLMICMATLTGAARVALGPDLPPFYTDDDPLAQALMQAGTAQADPLWRMPFWAPYESKIEP…	K01255	CARP; leucyl aminopeptidase [EC:3.4.11.1]		24.9347	24.8635	24.6854	24.7975	24.8538	24.9318	24.486	24.7403	24.7326	24.8426	24.8309	24.868	21.8515	22.631	22.4262	24.8279	24.861	24.653	24.8472	22.3029	0.104845	0.0550667	0.118098	0.015455	0.329933	0.0335678	0.0376811	0.033203	0.0369053	0.0182524	0.0331633	-0.174867	0.01933	-2.52497				+	0.712302	0.19242	0.809176	0.000498419	-0.20803	-0.0138333	-2.55813
DMKJLJHC_00460 S-(hydroxymethyl)glutathione dehydrogenase	MRTRAAVALEAGKPLEIMEVELEGPKAGEVLVEIKATGLCHTDEFTRSGADPEGLFPSILGHEGAGIVLEVGEGVTTLKPGDHVIPLYTPECRECPSCLSGKTNLCTAIRGTQGQGLMPDGTTRFKMLDGTPIYHYMGCSTFANHTVMPEIALAKVREDAPFDKICYIGCGVTTGIGAVINTAGVEIGSSAVVFGLGGIGLNVIQGLRMAGADMIIGVDLNDDKEAMARKFGMTQFVNPSKIEGTVVEEIVNMTKKGADQIGGVDYSFDATGNVKVMRDALECSHRGWGVSVIIGVAPAGAEISTRPFQLVTGRVWKGTAFGGAKGRTDVPKFVDWYMDGKIEIDEMITHKLTLDQINEGFDLMHAGKSIRAVVEY	K00121	frmA; S-(hydroxymethyl)glutathione dehydrogenase / alcohol dehydrogenase [EC:1.1.1.284 1.1.1.1]		25.9871	25.6017	25.8702	26.1675	26.0471	25.8973	26.0434	26.1582	26.3189	25.868	26.1285	26.1522	25.3657	21.7772	24.3352	25.8197	26.0373	26.1735	26.0496	23.826	0.161377	0.110517	0.112991	0.128786	1.50857	0.0667562	0.0851577	0.0952542	0.084926	0.0524611	0.217637	0.35378	0.229887	-1.99363					0.190692	0.0640026	0.190459	0.136663	0.136143	0.01225	-2.21127
DMKJLJHC_00461 1-(5-phosphoribosyl)-5-[(5-phosphoribosylamino)methylideneamino] imidazole-4-carboxamide isomerase	MILYPAIDLKDGQCVRLLHGEMDKATVFGDDPAAQAASFEAAGCEWVHLVDLNGAFAGEPVNAAAVEAILSRISVPAQLGGGIRDMATIERWLSKGLARVILGTVAVENPALVREAARAFPGQVAVGIDARNGRVATKGWAEETDVMVTDLARSFEDAGVAAIIYTDILRDGAMGGPNIAATEALARAVDIPVIASGGVSSLPDLITLRDTGVIAGAISGRAIYDGALDLQAALSALKA	K01814	hisA; phosphoribosylformimino-5-aminoimidazole carboxamide ribotide isomerase [EC:5.3.1.16]		24.0055	24.0249	24.1923	22.8602	23.1736	22.992	22.7254	22.6907	22.8166	23.2051	22.9539	22.7679	22.8205	21.1584	22.0377	24.0742	23.0086	22.7442	22.9756	22.0056	0.0838586	0.128504	0.0530889	0.179153	0.67891	0.0199092	0.010435	0.00884262	0.0100855	0.014853	-1.0656	-1.32999	-1.09857	-2.06865	+	+	+	+	0.000602686	4.56686e-05	0.00141978	0.012882	-0.264383	-0.03297	-1.00305
DMKJLJHC_00462 hypothetical protein	MKSIMLAAAALALSAGAALAADPIEGTWKTQPDDGAYAFVKIAPCGANFCGDIVKTFKGGAEFKSPNIGKQIVINMAPKGGGKYEGKVWRPANNKIYMGKITVQGNAMALAGCVAGGLFCKSQDWQRVQ				23.7962	24.0033	23.7257	24.3537	24.5185	24.6852	24.7573	24.8318	24.5193	24.5216	24.3896	24.2989	25.0662	21.8721	24.805	23.8417	24.5191	24.7028	24.4034	23.9145	0.117802	0.135335	0.133258	0.0914599	1.44808	0.0169459	0.02973	0.0343703	0.0271324	0.0557765	0.67739	0.86113	0.561667	0.0727467	+	+	+		0.00592856	0.00238114	0.00598112	0.946947	0.18374	-0.115723	-0.604643
DMKJLJHC_00464 Histidine biosynthesis bifunctional protein HisB	MRKAKITRTTAETEISVEINLDGTGSYDNQTGVGFFDHMLDQLSRHSLIDMVVRAKGDLHIDDHHTVEDTGIALGQALVQALGDKRGIRRYGHFALAMDDAQVHCALDLSARPFLVWNCDMPTAKIGTFDTELVREFFQALATHGGITLHVDRVHGLNAHHIAEAAFKSVARSLRMAVEPDPRMADSLPSTKGAL	K01693	hisB; imidazoleglycerol-phosphate dehydratase [EC:4.2.1.19]		21.3263	21.475	21.8715	21.6353	21.8395	21.4686	21.7627	21.6488	20.0508	21.57	21.7156	22.3477	21.9737	22.7433	22.5637	21.5576	21.6478	21.1541	21.8778	22.4269	0.230156	0.151706	0.781526	0.33758	0.328756	0.00347917	0.00406302	0.002937	0.00471199	0.0198906	0.09021	-0.403503	0.320173	0.86929				+	0.667559	0.522264	0.329909	0.0375356	-0.493713	0.229963	0.77908
DMKJLJHC_00470 2,3-cyclic-nucleotide 2-phosphodiesterase/3-nucleotidase	MEGTHKHVQQTEFDTERVTLRLRVLETTDLHGHVRAYDYFSDTHREGAGLAALAHEIAQARDQAQNSLLFDVGDFMQGTPLTQLWIEGNRTDSSALNPMISAMNTMGYDAGTLGNHEFDFGAEHLTQVLATAQFPIVGANIAFTRSRPQSPLAQRLTPWTILEREMYDLDGRTHRLRIGVIGFLTAQSRDWVSLKTGNRVSVAAPIAVARAEIARLRACQPDIVIALAHTGIAPAPKPPGNAVPTRDDAALALAEIDGIDVVLAGHDHLPFPGPHGPSGTGIDPIRGTLHGKPALNAGAYGTHLGVLDLTLQQVEGRWQITDHRAELRQPSGIESPAVVAVSDRAHHSALAHIRRRIGSLDTPLHSFFALLGPDPSVCLIHQVKLRHGRIALAGLPEAH…	K01119	cpdB; 2',3'-cyclic-nucleotide 2'-phosphodiesterase / 3'-nucleotidase [EC:3.1.4.16 3.1.3.6]		21.0531	21.3469	21.4943	21.4546	21.7027	21.1398	19.7523	20.6069	19.5104	21.2206	21.4034	21.497	21.8149	21.7496	21.5833	21.2981	21.4324	19.9565	21.3737	21.7159	0.183405	0.230338	0.47034	0.114774	0.0975093	0.00290648	0.00349948	0.00128058	0.0033225	0.0121516	0.13427	-1.34158	0.07558	0.41782		+		+	0.554108	0.0198054	0.647186	0.0466448	-1.47585	-0.05869	0.28355
DMKJLJHC_00471 NADH pyrophosphatase	MSDQSHTLPIDLEQAPAFAGISGLERRAELRRDTARLGALRELAQTRILPLWWGRPLICETGLGLLAHDHAFFAEQDGPEIFLGEAEGVFYFARDVSDFEPEGPAPDSTVFFDPSEQHHPSLPVSHVFSELRGAMARLDVLEAELAATARGMFEWHRLHGFCAACGSASEIADAGWVRVCPACKRHHFPRTDPVVIMLITKGNSLLLGRSPHWPEGMYSTLAGFMEPGETVEKAVRREVAEETGVVVGPVHFVTSQPWPFPSSLMLGCHGEALSTEITVDPEEIEDALWITRERLLEVVAGRDKVISPPRVGAIAGWLMRQWLADRLD	K03426	E3.6.1.22; NAD+ diphosphatase [EC:3.6.1.22]		22.2894	22.7051	22.4418	20.0762	22.1239	22.2279	22.084	22.6978	22.3536	22.0802	21.4282	21.8788	21.9165	22.0492	21.3575	22.4788	21.476	22.3785	21.7958	21.7744	0.171724	0.99069	0.251203	0.272569	0.299717	0.0065885	0.00360686	0.0068625	0.00445161	0.0126541	-1.00281	-0.100317	-0.68304	-0.704397			+	+	0.231219	0.665308	0.0400028	0.044838	0.90249	0.319767	0.29841
DMKJLJHC_00473 P-protein	MENRQKAGRIAFQGALGAYSHQACRDARPDLEPVPCRSFEDVIEAVRQDAADLAMLPVENTTYGRVADIHRLLPESGLRILDEAFVRVHISLMAMPGVQIEELTKVRAHLVLLPQAASFLARYGIRGEAAADSAGAAEELAVAQTRDVGVLASDMAAETHGLQILARHIEDNAHNTTRFLIMGKQADHSRRGAQMMTTFVFRVRNIPAALYKAMGGFATNGVNMTKLESYMVGGNFTATQFYADVEGHPDDPALGRALEELEYFTDYLEILGVYPADPKRIS	K04518	pheA2; prephenate dehydratase [EC:4.2.1.51]		23.3768	23.4992	23.8225	23.8064	23.7104	24.0326	23.7371	24.1815	23.7921	24.0166	23.812	24.1201	21.6098	21.0034	21.847	23.5662	23.8498	23.9036	23.9829	21.4868	0.188022	0.135047	0.197796	0.128052	0.355232	0.0139997	0.0186943	0.0197504	0.020273	0.0103668	0.283607	0.337387	0.416743	-2.07941				+	0.158208	0.15531	0.0606341	0.00185639	0.05378	0.133137	-2.36301
DMKJLJHC_00474 Cytochrome c-552	MFNTMTLTKTAGAVLSAFLFFLLTAWASSALYHVGEAEDHSGGEHEEMAKGPTMSAAPGDLLAQTDDAGAAASTDAAVVVDLGNGDAAKGAKVFGKCKACHSLEDKNGVGPHLDGVVDRAVASVDGFNYSDALKEHGGQWTIEALNSWLENPKDYIPGNRMSFAGLKSAEDRNDVIAYLQENSQ	K08738	CYC; cytochrome c		20.7369	20.1205	20.5199	22.6981	22.5253	22.5307	22.4893	23.2069	22.5835	22.7202	22.8544	22.7485	22.1185	22.0337	21.1253	20.4591	22.5847	22.7599	22.7744	21.7592	0.255306	0.0802135	0.31841	0.0577457	0.449529	0.00162478	0.0077782	0.00893942	0.00877228	0.0125212	2.12559	2.30084	2.31529	1.30008	+	+	+	+	0.000357751	0.0013412	0.000234948	0.0236605	0.175243	0.189697	-0.82551
DMKJLJHC_00475 putative ABC transporter-binding protein	MVQVRVAVSSFDADIQRKALALFAGAMIWAGFAFAAHAQEATSDAAQPAASTPAPDASDVITTYGIATLGDLKYPADFANLDYVNPDAPKGGEISEWAPGGFDNYNPYSIQGRAAALSSAPLEPMMEGTADTVGELYCLLCKSLEYPKSRDWVIFTLRDGIKFSDGSPLTAQDVVFSYEQLRDKGLSSFRQVIAQQVQSAEVIDPTHVKYTFKPGYPRRDLIQVVGSLPVFSEAQFKKDNLDLSQTTSVPFIGSGPYMFDSTKGNRSITWKRNPDYWGKDLPINKGRANFDRIRIEYFGDYQSAFEGFKSGTYTFRNEASSISWATGYNFPAIEKGEVVKASLPNGNVASGQGFIINLREPKFQDIRVRKALELMFNFEWSNETLFYGIYDRVESFWQN…	K13893	yejA; microcin C transport system substrate-binding protein		25.0088	24.8511	24.8908	25.0875	25.0484	25.1332	24.7041	24.6221	24.7901	25.0503	25.0569	24.9789	21.1529	21.957	22.0344	24.9169	25.0897	24.7054	25.0287	21.7148	0.0669927	0.0346596	0.0685919	0.0353565	0.39855	0.0357057	0.0441539	0.0344326	0.0418536	0.0121419	0.17279	-0.21148	0.11178	-3.20213	+	+		+	0.0316833	0.0355503	0.105203	0.000361204	-0.38427	-0.06101	-3.37492
DMKJLJHC_00476 Inner membrane ABC transporter permease protein YejB	MGAYILRRLLMVIPTLFGIMIINFTLTQFVPGGPIEQVIARVQGEADSMRNISGGGDAGSQNQGGVEDSGYQGARGISPELLNQLEVQMGYARIVCDTGFTGTPDLKNPACHKEKIPGWERFFIMMKSYATIDFGKSFFRNESVVHLVLDKMPVSITLGLWSTLLAYIISIPLGIRKAVRDGTRFDTWTSGAIIVGYAIPGFLFAVMLMVLFAGGSYWKIFPLRGLTSDDFDQLSLVGKALDYLWHIALPVAATTIASFATMTLLTKNSFLEEINKQYVITARAKGLSEKKVLYGHVFRNAMLIVIAGFPAQFLGIFFGASIIVETIFSLDGLGLLGFQAAVERDYPVIFGTLYMFGLISLVVNILSDLMYVFVDPRIDFEKRSG	K13894	yejB; microcin C transport system permease protein		20.0793	20.5039	19.2676	20.1188	20.2214	19.8384	20.6887	20.9639	20.3661	19.9373	20.4218	20.401	20.9185	21.4983	22.6931	19.9503	20.0595	20.6729	20.2534	21.7033	0.512903	0.161886	0.244327	0.223656	0.738832	0.00114189	0.00135125	0.00210406	0.00152835	0.0120456	0.109273	0.722653	0.303133	1.75303					0.788134	0.14643	0.486301	0.0510364	0.61338	0.19386	1.64376
DMKJLJHC_00478 Glutathione import ATP-binding protein GsiA	MKPVLEVENLRVSFASEGRVSQAVKGVSFTVGDGETVALVGESGSGKSVTALSTVALLGGSARLEGSIRYAGREMVGASERELMATRGNDISFIFQEPMTSLNPLHTLEKQLAESLALHQGLRGAAAKARVIELLQKVGIPDPETRLDDYPHQLSGGQRQRVMIAMALANGPDLLIADEPTTALDVTIQAQILDLLADLKRDMGMSLLFISHDLGVVRRIADRVCVMQNGEIVEQGPTEEIFANPRHPYTRKLLAAEPTGQADPVPEGAAELVRTENLKIWFPIQRGLLRRTIGHVKAVNDASLSVRAGETLGIVGESGSGKTTLALAIMRLIQSEGPILYEGADISQWQASRLRALRRDMQIVFQDPFGSLSPRLTVEQIIAEGLTVHGVEKGRNRRE…	K13896	yejF; microcin C transport system ATP-binding protein		23.3924	23.6448	23.2661	23.2608	23.3351	23.4906	23.0604	22.3039	22.817	23.176	23.1252	23.2704	22.5804	21.8527	23.2966	23.4345	23.3622	22.7271	23.1905	22.5766	0.157426	0.0957193	0.315325	0.0601832	0.589456	0.0127783	0.013333	0.00873843	0.0117053	0.022065	-0.0722933	-0.707347	-0.243943	-0.857913		+			0.608521	0.0469465	0.110071	0.117639	-0.635053	-0.17165	-0.78562
DMKJLJHC_00482 Thiamine-binding periplasmic protein	MKPTLMLAGALSLIATIAAAQDKPVLTVYAPDYFTSEWGPGPAIEKGFEARCDCTLKFVAGDVLPRVMLEGDKTKADVVIGLNTDVTAKARATGLFAPHNEDTSDLTMPVKWTDPIFLPFDWSDLAFVYDKTKLKNPPHSFQELLDAPDDAYKIVIEDPRSSIAGLSLLLWVKDIYGDKASEAWAKLAPKVLTVTPGWSEAYGMFTDGEADMVLSYVTSPAYHIMAEKDDSKVAAIFPEGHYFTPELAAQLKTSKHPKLAQAFMDYILSPEFQKMIVTANWSFPSKLPHDQLPEVFRDLPMPDKTLYLPEAEAEKLRGPALDEWQRAFAR	K02064	thiB; thiamine transport system substrate-binding protein		26.4468	26.0966	26.204	21.7345	20.1998	20.9598	21.9531	20.2998	20.3015	22.0117	21.2724	21.2831	21.0342	22.1259	21.4791	26.2491	20.9647	20.8515	21.5224	21.5464	0.146496	0.626585	0.778973	0.346006	0.448204	0.0899018	0.00253055	0.00238129	0.00368329	0.0108041	-5.28443	-5.39764	-4.7267	-4.70275	+	+	+	+	0.000314109	0.000650077	5.86568e-05	0.000146668	-0.11321	0.557727	0.58168
DMKJLJHC_00485 Proton/glutamate-aspartate symporter	MTSTSSPTPDGGRRKMTLTTQIMLAMGLGIIVGVIFNMIGSEFINTHIVGGLFAMIGKMFVNALKMLVVPLVFFSLICGVTGIGDIRVLGRVGGKSFGLYMLTTAVAIAVAIVIASLIGPGKGFDMAGIDTSGISGKQAPSVWDVFAGIVPTNPVAAFANGEMLQIIFYTIILGIAVLMLGHESKGFVKAAEYMNEVMMKIVAIVMAFAPIGVFALIAKTFTEQGIDLFLPVLAYVLTLVFALLLHLFGTLMLFLKMFSGLNPITFMKKIRPAQVFAFSTASSNATIPVTLRCVTERMGAKNSVASFCVPFGATINMDGTAIMQGVATVFLANVYGIDLGLGGYLTVIAMAVLASIGTAGVPGVGLVMLTMVLSQVGLPIEGIALILGVDRLMDMIRTA…				23.2382	23.0424	22.676	23.7527	23.5526	24.0224	22.8285	23.2789	22.6051	23.7633	23.9053	23.9564	21.5978	22.1824	23.2831	22.9856	23.7759	22.9042	23.875	22.3544	0.233025	0.192497	0.280266	0.0816771	0.698666	0.00936134	0.0177612	0.00987936	0.018812	0.0189164	0.790343	-0.0813967	0.88945	-0.63113	+		+		0.0208727	0.767931	0.00701116	0.292247	-0.87174	0.0991067	-1.42147
DMKJLJHC_00486 Chorismate synthase	MSFNSFGHLFRVTTWGESHGPALGATVDGCPPGIEIEPAFIQQFLDRRRPGQSKETTQRKEPDEVRILSGTFEGRTTGTPIQLMIENTNQRSKDYGEIAQQFRPGHADITYHQKYGVRDYRGGGRSSARETAARVAAGGVAQAVLRKLVPGLKITGYMVQMGEKHLDRSRFDRAAILQNPFFLPDAGAVEEWSEYLAAIRKGQSSVGAAIEVVAEGCPPGLGAPVYGKIDTELAAAMMSINAVKGVEIGEGMGAAALTGIENADEMVMGPDGVEYLSNHAGGILGGITTGQPITVRFAVKPTSSILTPRRSVNTRGEEVEVITKGRHDPCVGIRAVPVAEAMMACVILDHLLMDRAQTGGQRGEIG	K01736	aroC; chorismate synthase [EC:4.2.3.5]		24.393	24.2685	24.1414	23.507	23.8098	23.7542	23.6482	23.5305	23.809	23.7489	23.7541	23.7552	24.0206	22.1751	21.7753	24.2676	23.6903	23.6626	23.7527	22.657	0.102725	0.131608	0.114146	0.00276282	0.977941	0.0227658	0.0167384	0.0167124	0.0172833	0.0233307	-0.57731	-0.60505	-0.51491	-1.61062	+	+	+		0.00810064	0.00508323	0.0020938	0.0814587	-0.02774	0.0624	-1.03331
DMKJLJHC_00489 Prolipoprotein diacylglyceryl transferase	MLPLAIPFPQFDPVALTIPGLGLPIRWYALAYIAGLVLGWRIIVALMKRPGLWPAGQAPIRPNKVEDLLTAVIIGVILGGRLGFVLFYEPAWYLSHPLDVFKVWQGGMSFHGGFLGTLVAGWWFARRNDASKLQIADAMALVAPIGLFLGRIANFIKPELWGRPTDVPWGVIFPGPEAQDCMGIAGQVDGMCARHPSQLYEAGLEGLVLGLILWGLMRYGRSLKRPGLSLGVFVTGYGCARAFVELFRQGDPQFVTPGNPFGHVIRFTDGFGLTMGQVLSIPMILVGLFFIIRALRAPKGA	K13292	lgt; phosphatidylglycerol---prolipoprotein diacylglyceryl transferase [EC:2.5.1.145]		19.8666	20.7725	21.3626	21.3646	21.54	21.3865	20.2159	20.2246	20.63	20.1601	21.4096	20.1835	21.8883	21.4966	21.572	20.6672	21.4304	20.3568	20.5844	21.6523	0.615276	0.0780288	0.1932	0.583597	0.169703	0.00187693	0.0034946	0.00169006	0.00192247	0.0116274	0.763153	-0.3104	-0.08283	0.9851					0.156806	0.533432	0.896811	0.0944537	-1.07355	-0.845983	0.221947
DMKJLJHC_00494 Oligoendopeptidase F, plasmid	MTLTPRRPVFDANATGGAFGDLPDWDLSDLYAAPDAPELVADMSWLETHCAEFARDYEGKLADLDAAGMAECIARYEAIDEKAGRIMSYVGLRYYQNTGDVARVKQMADAQDKITGYTTPLVFFSLEFNRIEDAHYETVFADPRVSRYKPVFDRMRAMKPYQLSDELEKFLHDQSVVGAAAWNRLFDETTAALEFDVLGETLSLEATTTLLSDHDRARREAAAHALARVFKDNIRTFSRIHNTLAKEKDIEDRWRKMPTPQTGRHLSNDVEAEVVQALRDAVVAAYPRLSHRYYALKAKWLGLDTLQVWDRNAPLPTEAPREIQWDEAKSTVLDAYAGFDPRMAEIAQPFFEKGWIDAGVKPGKAPGAFAHPTVTSAHPYVMLNYLGKPRDVMTLAHEL…	K08602	pepF; oligoendopeptidase F [EC:3.4.24.-]		27.4314	27.4563	27.5025	27.2441	27.2977	27.183	26.534	26.521	26.6454	27.2477	27.1966	27.2367	26.0418	23.1453	25.0012	27.4634	27.2416	26.5668	27.227	24.7294	0.0294486	0.0468672	0.0558193	0.02198	1.198	0.208595	0.196224	0.125112	0.192081	0.0981255	-0.2218	-0.896587	-0.236403	-2.73398	+	+	+	+	0.00478164	3.62248e-05	0.000809414	0.0320839	-0.674787	-0.0146033	-2.51218
DMKJLJHC_00495 hypothetical protein	MTDYFNEMFDGGKVRPPYNGLDGWTREMPAEFRAMKQAEAEALFRRIGITFAVYGEGGDPDRLIPFDMFPRVFTQMEWRKLERGIKQRARALNAFLLDVYGRGEIVRAGRIPARLVYQNDAYERAVSGFVPPRGIYSHIVGIDLVRTGPDQFYVLEDNCRTPSGVSYMLENREIMMRMFPNLFRENRIEPVDGYADALRRTMASVAPAKCDAEPTIAILTPGHFNSAYYEHSFLADLMGVELVEGADLFVEGGFCWMRTTEGPKKLDVIYRRIDDAFLDPLCFRPDSMLGVPGLMDVYRSGGVTICSAPGAGVADDKAIYTYVPEMVRFYLGEEPLLENVPTWQCAKKDDCKYVLEHLPELVIKEVHGSGGYGMLVGPKSTKEQIEAFRHKIIDDPDNY…				23.5066	23.3772	23.4953	23.7522	23.7081	23.7623	23.1732	23.2923	23.4991	23.7808	23.6334	23.6212	24.1665	20.824	21.9396	23.4597	23.7409	23.3216	23.6785	22.31	0.058556	0.0235409	0.134641	0.0725073	1.38949	0.0130039	0.017335	0.013194	0.0164162	0.0183433	0.281147	-0.138157	0.21876	-1.14967	+		+		0.00324441	0.254067	0.0293928	0.307285	-0.419303	-0.0623867	-1.43081
DMKJLJHC_00496 hypothetical protein	MLSRTAENLFWIARYMERAETMSRLLEVGARISLTPSAGHGYRSEWESLLQASGTAEGFAEKYGDPVQRNIESYLFFDRDNPSSVISCIERARENARIVRTAITGQVWDTLNTAFQDIRQLERKPRSEMETSDLCDWVNRQSSLLRGTMDSSMLRNDGFSFMNLGYALERADNTARLIDVKYFVLLPSVSMVGSGFDNYQWQVLLRAMQSHRAFHWAYGGEITAAKIVDFLILNPSSPRSLMSAAQKAMRHIDSLSRFYNQPSGPAQERVRGLVDALKATRVPEIFDEGMHEFLTRFIHDIGDLTALVQRTYLTGEAQ				23.3784	23.3506	23.4283	23.8074	23.599	23.6057	23.4621	23.4824	23.4887	23.8511	23.6539	23.563	22.5891	21.4464	21.9677	23.3857	23.6707	23.4777	23.6893	22.0011	0.0321553	0.0967235	0.0113342	0.120246	0.46711	0.0123539	0.0165123	0.0147025	0.0165404	0.0148068	0.284977	0.092	0.303607	-1.38469	+	+	+	+	0.0167627	0.0188412	0.0260664	0.0138919	-0.192977	0.01863	-1.66966
DMKJLJHC_00498 hypothetical protein	MTYCVGLLLNAGMVLLSDTRTNGGLDNIATYRKMFTFVEPGERVVAIMTAGSLSVTQTTLARLREEIDAPEADGNSSIMQAPTMLKVAEIIGNTLAGVRKDIVSRMDAERISTSASMIVAGQRAGGEMRMFLIYPEGNFIEATEDTPFLQIGEHKYGKPILDRVVRSETGLEDAQKAVLLSMDSTLRSNLSVGMPLDLAVIRNNDCKISMQRRIEAGDTDFAEMSEAWSTALRDSFTQIQL	K07395	putative proteasome-type protease		21.9606	21.9779	22.3217	20.1137	19.6428	19.9993	19.7228	19.2352	20.3026	21.3431	21.0587	20.0065	22.5193	21.6375	22.3004	22.0867	19.9186	19.7535	20.8028	22.1524	0.166312	0.200531	0.436317	0.574894	0.37493	0.00502075	0.00122551	0.00111247	0.00223663	0.0164443	-2.16812	-2.33323	-1.28399	0.0656367	+	+	+		0.000298212	0.00211561	0.0386228	0.832053	-0.16511	0.88413	2.23376
DMKJLJHC_00499 Lysophospholipase L2	METAPLFDVIARGPEGGAAYWLKTEDGYRIRMGHWPAPSDARGTVFLLCGRTEYIEKYGPAAVEFAARGYGMLAIDWRGQGLADRVLPKDPMKGHVGGILDYQLDLKAVIAAAKELGLPEPFHFVGHSMGGAIGLRHIMTPGHVFASAAFSAPMWGIKAPAPLHPFRILLAQLFGDSFMAESFAPGMTDETYVYRSSFNENRLTRDPAMWSWLISQAAAEPALTIGGATIHWVAESLLECEALSALPSPDLPCYCALGGEEKIVHTPAVHDRMARWPNAAFDVMPGSEHEIMMEVPTTRTKFYDRCAEMFDAAGGRDAGVRAESA	K01048	pldB; lysophospholipase [EC:3.1.1.5]		21.1307	21.4476	21.5116	22.1055	22.5872	22.56	22.5192	22.5344	22.4599	22.3974	22.0656	22.1945	21.1183	22.539	22.3709	21.3633	22.4176	22.5045	22.2192	22.0094	0.166508	0.220921	0.0321448	0.136559	0.633834	0.00304084	0.00692741	0.00748876	0.00597002	0.0148926	1.05425	1.14116	0.855847	0.646077	+	+	+		0.00573263	0.000680651	0.00492644	0.235705	0.08691	-0.1984	-0.40817
DMKJLJHC_00500 hypothetical protein	MSEVIDQAVAALKQKLPDGFSSTAKFVIKDEGSIIVDESGVRPGDDEAEVVLTADRETFEGMLNGDVNPTSAFMSGKLSVDGSMGLAMQLGAALA				23.2059	20.1445	18.7966	21.6703	22.3983	22.3463	22.2034	22.5669	22.4868	22.6063	21.9153	22.2694	21.7081	21.9833	23.0317	20.7157	22.1383	22.419	22.2637	22.2411	1.84484	0.331603	0.155918	0.282141	0.570258	0.00194108	0.00570821	0.00705817	0.00615713	0.0174869	1.42258	1.70334	1.54798	1.52536					0.343564	0.263109	0.305875	0.326497	0.280753	0.1254	0.10278
DMKJLJHC_00502 hypothetical protein	MQTGRITAVLGPTNTGKTHYAIERMLAHRTGVIGLPLRLLAREVYDRIVAQRGPSVVALVTGEERIVPERTQYWVATTEAMPTNIGADFLAIDEIQLCGDPERGHVFTDRLLHARGLHETLFLGSETMRGAIAALVPKVQFSKRERFSELTYAGSKKISRMKPRSAIVGFSVENTYAMAELIRRQKGGCAVVMGALSPRTRNAQVAMYQNGDVDYLVATDAIGMGLNLDIDHVAFSATSKFDGRRMRPLFPYELAQIAGRAGRHTTDGTFGVTGEASPLQPEIVDAIENHRFAPLQRLQWRNDRLEFGTLDRLIGALEARPEPRDGGEWLTKGREADDLRALKVLGEDPEVRDRVSRPSDVQLLWDVCRIPDFRSISEAEHATLLARIFGFLQSGRGVP…	K17675	SUPV3L1; ATP-dependent RNA helicase SUPV3L1/SUV3 [EC:3.6.4.13]		25.9539	25.9027	25.8939	25.0807	25.2558	25.2608	25.4251	25.1983	25.549	25.1897	25.2553	25.2906	20.8639	20.9674	23.0232	25.9168	25.1991	25.3908	25.2452	21.6182	0.0264507	0.0837416	0.145216	0.04181	0.994414	0.0714062	0.0476332	0.0553706	0.0486299	0.0113553	-0.71768	-0.52603	-0.671623	-4.29867	+	+	+	+	0.000320158	0.00728242	4.33806e-05	0.00362941	0.19165	0.0460567	-3.58099
DMKJLJHC_00512 3-mercaptopyruvate sulfurtransferase	MDNPKTLVSTDWLAAHLNDPDLRVLDGSWFLPQMGRDAKATYAAKHIPGARFFDIDDISDNRSQLPHMAPPTEKFISRLRAMGVGDGHQVVIYDQLGIFSAPRVWWLFRLMGKTDVAVLDGGLPKWEAEGHPLEDLPPMVRDRHMTVQRQSGLVKDVTQVAHASKLGDFEIIDARPADRFAGLGEEPREGLRKGHIPGSRNLPFGQLLTAEGTFKSPDAIKALFEQANVDLSKPVITTCGSGVSAATLALALELIGKTDWSLYDGSWSEWGMYNDLKVATGEA	K01011	TST; thiosulfate/3-mercaptopyruvate sulfurtransferase [EC:2.8.1.1 2.8.1.2]		24.5801	24.6301	24.9956	24.672	24.7983	24.8636	24.8385	25.1912	24.9836	24.8514	24.7699	24.6367	22.8458	20.8943	20.967	24.7353	24.7779	25.0044	24.7527	21.569	0.185189	0.0795397	0.144726	0.088497	0.903319	0.0314817	0.0355725	0.042362	0.0345654	0.010975	0.0426533	0.269157	0.0174	-3.16626				+	0.779627	0.180646	0.91035	0.00830311	0.226503	-0.0252533	-3.20892
DMKJLJHC_00513 Aromatic-amino-acid aminotransferase	MLNNLKPQAPDKILALMEEYRADERDQKVDLGVGVYKDAEGVTPIMSAIHKAEKQVWETETTKKYAGLAGQPEFHAAMAEMVLGKGYPADRLSCLSTVGGTGACRMGFELARMANPDTTIWVSDPTWPNHLSILNFMGQAFKTYSYFDAETRAVDFDAMLSDLKAVKSGDIVLLHGCCHNPTGANLTLEQWGQVADLLEESGAIPMIDLAYQGFGDGLEEDAAGTRLIAQRLPEVLIAASCSKNFGIYRERTGCLMVLGDAATQKTTQGSLAYLNRQTYSFPPYHGQALVTRVLTDPALRAEWEAELEEVRTGMLALRQQLADELRRLSNSDRFDFVAEHRGMFSRLGATPEQVAKMKAENGIYMVGDSRINIAGLNKNSVPLLARALLDAGV	K00832	tyrB; aromatic-amino-acid transaminase [EC:2.6.1.57]		27.0657	27.0342	27.0103	26.8793	26.9311	26.9328	27.0867	27.1742	27.0597	27.0328	27.1329	27.0459	27.2762	26.9778	26.9474	27.0367	26.9144	27.1069	27.0705	27.0671	0.0226785	0.0248125	0.0488523	0.0444335	0.148366	0.155191	0.156409	0.181914	0.172339	0.496025	-0.122317	0.0701167	0.03379	0.0303933	+				0.00676337	0.139424	0.392357	0.788807	0.192433	0.156107	0.15271
DMKJLJHC_00514 putative HTH-type transcriptional regulator YusO	MPEHTLGFLLHDATRLIRRRFEARAHELGLTTAQWRLLVQLKREGPLAQAQLAELLEIEPISVSRLVDRMEEANWVLRKQDSHDRRVKLVHPSPKAISVFEQARCIADATYEKALRGVSKHSAERLTRTLHQVIDNLSDDEARIEGREEKDE				22.9573	23.0025	22.9096	21.4655	21.3963	20.1597	21.904	21.7172	22.1535	21.1995	21.2107	20.9625	21.4371	21.9395	21.0116	22.9565	21.0072	21.9249	21.1242	21.4627	0.0379144	0.599912	0.178717	0.114454	0.379254	0.00917459	0.00260621	0.00501123	0.00279486	0.0101957	-1.94929	-1.03158	-1.83229	-1.49374	+	+	+	+	0.0101371	0.00133317	2.77232e-05	0.00518228	0.917707	0.117	0.455547
DMKJLJHC_00515 putative multidrug resistance protein EmrK	MSNDQDTKTSPDSEAPAKKARKKGPKFWLLILVPALIVIGGAWFWLSAGGSESTQNANFQMARIPIATQISGRVTKVFVTENEHVKKGAPLFEIDKKPYELALAKAEASLASAKLDIEQLRASYKAALAEEKQAADNAQYQANQLKRQESLTKSGAATQTSLDAQRTQTRAAEDTLAAAQQKVASAKVALNGDPEISVEEHPMVQAAIAAVNDAKYNLSQTELRAPSDGIIYQASSFKPGEMVSAGASLFTLVDTSDVWVIANFKETELTDMQAGQSATVVFDAFPSRTYHATLEAIGAGTGAEFSLLPAQNATGNWVKVTQRVPVRLRLSEGSNLEGLRTGLSADVTVDTNSKPLYQKILSQSSGAEAATAPASQDK	K03543	emrA; membrane fusion protein, multidrug efflux system		23.2954	23.1755	23.106	24.4792	24.0656	24.3104	25.697	25.857	25.7269	23.6035	22.9486	23.0187	22.7266	22.6591	21.6714	23.1923	24.2851	25.7603	23.1903	22.3524	0.078239	0.169792	0.0694409	0.293625	0.482349	0.0108039	0.0252784	0.0715329	0.0117033	0.0188895	1.09276	2.56796	-0.00205	-0.839943	+	+			0.00116863	4.10814e-06	0.992845	0.0719123	1.4752	-1.09481	-1.9327
DMKJLJHC_00521 Penicillin-binding protein 2D	MTQKGGRRGPLVADKRYSSSKQAPGKPNTPKPRKPRGKKPQRPKRNHGLFTGAVIGLANAIWRLIWGGFWRFTMVIALVVVGTSLYFYSTLPDYTKLLDGRTRGSVTMLDDQNKVFAWRGETFGGQIDAKNVSPFLRDAVIATEDKRFYHHFGISPRGIASAIAINLRAGRGPFEGNGGSTITQQVAKLLCLGVKFNPKEWKNEAAYESDCRSGGLKRKIKEVPYAFALELKYTKDQILSIYLNRAYLGAGARGFEAASERYFGISAANVDPQQAAMLAGLLKAPSYFAPTNNLERSQARAQTVLDLMHEQGYLTDRQYLDAKNNPATLSKAAQQRAGGYFADWLMDTIPDFLSRDTTEDVVIHTTLDQRIQAAAEDAMQSVFTNKVSKNSEAQAAIVV…				25.6329	25.7518	25.6751	24.2086	24.2925	24.4951	21.0618	19.5942	22.9302	24.6068	24.057	24.381	21.3886	20.7486	21.8227	25.6866	24.3321	21.1954	24.3483	21.3199	0.049214	0.12029	1.36517	0.225666	0.441161	0.0608733	0.0261154	0.00302235	0.0261155	0.00923481	-1.35451	-4.49117	-1.33832	-4.36663	+	+	+	+	0.000123339	0.00966507	0.0012082	0.000154818	-3.13666	0.0161867	-3.01213
DMKJLJHC_00522 putative phospholipid-binding protein MlaC	MPMSMTPMKTPRCNRRRALGLGAAGLAAALLPGPALALNDAQARALIQQAVNDVNAAISSGRTGPALYAMFEQIFAKYADVNVIGRSALGVAARQASPAQLAAFTKAYQGYLARKYGKRFREFIGATFKVEGARPIKSFYEVKTLASLRGQAPFEVLWQVSDRSGRDKFFNLIVEGVNMLASERAEIGAMLDRRRGNIDALIADLKTAG	K07323	mlaC; phospholipid transport system substrate-binding protein		23.0966	23.0839	23.2277	23.4042	23.5252	23.4041	23.4649	23.5881	23.5791	23.3194	23.2141	23.2666	22.172	21.6284	21.5175	23.1361	23.4445	23.544	23.2667	21.7727	0.0650171	0.0570565	0.0560772	0.0429682	0.286007	0.0103907	0.0141156	0.0153937	0.0123398	0.0126389	0.308397	0.407943	0.1306	-1.36341	+	+		+	0.00727222	0.00255444	0.0768252	0.00277121	0.0995467	-0.177797	-1.6718
DMKJLJHC_00526 Cystathionine beta-lyase PatB	MTAPNFDEMIDRVGTHSNKWDGMEERYGVSPQNGISMWVADMDFRPPACVQRAVESMAEHGVYGYWGGMEEYNAAIAWWMQTRHGWSVDPDWIFTTHGLVNGVAVSIEAYTDPGDAVVLMTPVYHAFARVTKAAGREVRECPLVRENGRYEMDFDAWDALMTGNEKMLILCSPHNPGGRVWTKAELEATAAFARKHGLVLVSDEIHHDLVMPGQTHLPMSVACPDQPVVMMSATTKTFNIAGAHIGNVIISDPALRAKFAARMTALGISPNSFGIAMATAAYSPEGAEWVDALCAYLDGNRKVFDDGIAAIPGLAVMPLEATYLAWVDFAGTGMSPEEFIARVERDASIAANHGHTFGAGGETFLRFNLATPRARVEEAVSRLRAAFADLQ	K14155	patB; cysteine-S-conjugate beta-lyase [EC:4.4.1.13]		24.0642	24.2112	24.1632	23.8799	24.2742	23.8886	23.8162	23.8998	23.7004	24.0228	24.0575	24.1917	24.1626	22.1923	24.296	24.1462	24.0142	23.8054	24.0907	23.5503	0.0611904	0.183845	0.0817415	0.0728354	0.961794	0.0209281	0.0209517	0.0184518	0.0218458	0.0433344	-0.131973	-0.34078	-0.0555033	-0.595907		+			0.389973	0.00917235	0.455658	0.431236	-0.208807	0.07647	-0.463933
DMKJLJHC_00530 hypothetical protein	MRKLLLTGAAIAALTIPAHAGDLAFVLGNSNYDRIGAVKGADGVAGAQSNLQAAGFAVLSAKDADAGDIRTKFRDFVDEAAQADTVAVTLSGRFVHTRAETYFLPVDVRDQSLPEAVSEALPLSAVLSVLAAHPGHAVLVLGADKAAEDPSGLTRPGIGTLDIPQGVSVLRGTPQQVVALLKSDFAQPGQALAAAASSAGLSQSGYLPDDLSLVSSDAMVQKPAKPAPAPAADPSAAYWDLARTQDTVDAYQLYLNRYPDGPHADDARTRITALKAQPAQQASAAEDALGLTRDQRREVQQYLTILDYDPKGVDGVFGPGSRAAIARWQRANGFEDTSYLTRDQLTRLSGQGEKRSAELDAQAKARQAEIDKQDRSYWEQTGKAGDEPGLRAYLKKYPD…				23.7425	23.7839	23.6828	24.3148	24.2002	24.2534	23.5348	23.5304	23.6368	24.1542	24.0364	24.0825	21.6999	21.7671	21.9682	23.7364	24.2561	23.5673	24.091	21.8118	0.0414801	0.04681	0.0491343	0.0484766	0.113966	0.0157531	0.0247761	0.0156445	0.0218506	0.012986	0.519717	-0.169077	0.35462	-1.92465	+	+	+	+	0.00029998	0.0205006	0.00141542	2.3341e-05	-0.688793	-0.165097	-2.44437
DMKJLJHC_00532 High-affinity branched-chain amino acid transport ATP-binding protein LivF	MRDETGGDTALLEVNNIEVIYNHVILVLKGVSLSVPKGGITALLGGNGAGKTTTLKAISSLLGSERGEVTKGSILYRGERVEGGAPAELVRKGVIQVMEGRHCFEHLTVEENLLTGAYTRRDGRAAIQSDLEMVYTYFPRLRERRKSQAGYTSGGEQQMVAMGRALMSRPEMILLDEPSMGLAPQLVEQIFQIVKAVNESEGVTFLLAEQNTNVALRYAHYGYILESGRIVMDGPAADLRENPDVKEFYLGMGDDGRKSFRDVRSYRRRKRWLA	K01996	livF; branched-chain amino acid transport system ATP-binding protein		19.1047	19.7769	20.4404	18.9945	20.478	19.9225	20.2621	20.4652	20.3805	19.5934	20.1702	20.1395	21.2369	21.9193	21.7731	19.774	19.7983	20.3693	19.9677	21.6431	0.545293	0.611973	0.0832921	0.264952	0.293367	0.00101056	0.00112745	0.00170472	0.00125378	0.0115532	0.0243067	0.595277	0.193707	1.86908				+	0.968558	0.201675	0.674787	0.0129618	0.57097	0.1694	1.84478
DMKJLJHC_00533 hypothetical protein	MKKTLTAWVAAAITLTSAPAFANLVVPNLSYRTGAYAANGIPYADGFNDYFTLLNERDGGIGGEKVQSPECETAYNTEKGVECYESTKGTGALVYNPLSTGITYQLIPKMSADGITLYTPGYGRTSAANGKVFKWVFNFPANYWDGASVAIKYILDQEGGDIKGKTVALVYHNSAYGKEPIRTLEELAKKHGFTLKAIPVDHPGQEQKSQWLQIRREKPDYVLMWGWGVMNQVAIQEAVNIRYPMDHFIGVWWSGSENDVAPAGDKASGYKSLSFHGTGGGYPVYDDLKKYVVDTGKASGAGDQIGTMLYSRGMYAAMIISEAIRKAQEMTGKSDVNAAEVRDGFENLDLTEARLEELGLPNFAQPIKASCENHGGPGSAKVFQWDAAAKKWNEASDWI…	K01999	livK; branched-chain amino acid transport system substrate-binding protein		26.4647	26.5673	26.5235	27.6976	27.8257	27.7891	27.8823	27.8879	27.871	27.8818	27.8586	27.7786	27.5818	21.3605	26.9296	26.5185	27.7708	27.8804	27.8397	25.2906	0.042031	0.0538681	0.00700412	0.0441905	2.79176	0.108359	0.283179	0.310976	0.293709	0.144784	1.2523	1.36188	1.32115	-1.2279	+	+	+		1.31612e-05	1.4328e-06	6.76325e-06	0.567676	0.109587	0.06885	-2.48019
DMKJLJHC_00538 Long-chain-fatty-acid--CoA ligase FadD15	MPQWARRNRLFARGRCRATGAREDNLADAVATGQDTARSIPALLARNAARYGALPAYREKEFGIWQSWTWAQSAQEIRALALGMLNLGVERGDHVAIIGRNRPAHYWAIVASQMCGAVPVALYQDAAAEEMAYVMEHCGARFVVAGDQEQVDKVLEIEDQIQPLTHVMYTDKRGMRKYDHARMNALADVQAEGRAAQQRLGAELDRRIAELDYDSTCVMLYTSGTTGKPKGVVLSNRNIIETAKASSEFDRLNRNDEVLAYLPLAWVGDFIFSVGQAYWTGFTVNCPESPDTMMTDLREIGPTYFFAPPRVFEQQLTTVMIRMEDAGRVKKWLFDHFMSVARAVGPDILDGKPVGLGKRLSYWLGDLLVYGPLKNTLGYSRIRVGYTAGEAIGPEIFSF…	K01897	ACSL; long-chain acyl-CoA synthetase [EC:6.2.1.3]		22.0625	20.4749	20.6327	23.0806	22.9326	22.6185	23.9397	23.5551	23.6838	23.1411	22.9005	22.9916	21.2464	22.6144	22.4974	21.0567	22.8772	23.7262	23.0111	22.1194	0.714111	0.19267	0.15984	0.0991564	0.619123	0.00245861	0.00952678	0.0174654	0.0103363	0.0160725	1.82055	2.66949	1.95438	1.06271	+	+	+		0.0253308	0.00670285	0.01856	0.187007	0.848937	0.133833	-0.757843
DMKJLJHC_00541 Lipoprotein E	MNYKALLAASAAVLTLAAPQSFAQDAKAPAPNDLLNATLWMQNSVEYKAVTMGLFQLAKIRLDEALADKKWTAVPDKEGAGYEDKPIAIIADLDETLLDNNGYQASLVTRGTSFSSKEWTDWVNAEDTKATAGAVDFLKYADSKGVKIFYVTNRTKDEEKGTRANLEKLGFPMGGNVDTLLTKNEQDGWGSAKENRIAYVAKDYRVALLMGDNLGDFSDVAKGTVEERHAFLDKTKDNWGKTWIMFPNPEYGSWESAAFGGDWSKSEEQRRQDKIDALKPWTPTK				26.2866	26.2403	26.483	26.8781	27.2432	27.0341	26.0062	26.2551	26.2196	27.0938	26.8249	26.7364	26.2338	21.8262	25.0525	26.3366	27.0518	26.1603	26.885	24.3708	0.105234	0.149578	0.109909	0.151971	1.86284	0.095524	0.172033	0.0943897	0.151543	0.0765306	0.715153	-0.176333	0.548377	-1.9658	+		+		0.00522426	0.176591	0.0137464	0.210471	-0.891487	-0.166777	-2.68096
DMKJLJHC_00544 GTP pyrophosphokinase rsh	MIDVEDLIALVRNYNPRTNADLIRRAYAYGHEMHEGQFRHSGEPYFTHPVAVAAILTEQRLDDATIITALLHDTIEDTRSTYSEVTELFGEEIAELVDGVTKLTNLQLSNAASKQAENFRKLFMAMSKDLRVILVKLADRLHNMRTIRSMRPEKQAQKARETMEIYAPLAGRMGMQWMREELEDLAFKVLNPEARTSIIRRFVGMQKDSGDVIPKITADIRALLEDEGIDADVFGRAKRPYSIWRKMEEKQLTFSRLSDIYGFRVITRSEMDCYRVLGLIHHRWRVVPTRFKDYISQPKTNGYRSIHTTVSGRDGKRVEVQIRTRQMHEVAEAGVAAHWSYRDGERAQNPFAVDPAKWLASLNERFSDGDGDADHDEFLENVKLEMYSDQVFCFTPKGD…	K00951	relA; GTP pyrophosphokinase [EC:2.7.6.5]	K00951/K01139	23.9879	23.9712	24.0546	24.0292	23.9506	23.8381	23.7205	23.6494	23.7125	23.8903	23.9533	23.9554	21.0061	21.6118	20.9853	24.0045	23.9393	23.6941	23.933	21.201	0.0360329	0.078432	0.0317715	0.0302083	0.290536	0.0189706	0.0198911	0.0170818	0.0195839	0.00850422	-0.0652367	-0.3104	-0.0715133	-2.80349		+		+	0.345337	0.000795973	0.097885	0.000172079	-0.245163	-0.00627667	-2.73825
DMKJLJHC_00547 hypothetical protein	MFYKDERLALFIDGSNLYAAAKALGFDIDYKLLRHEFERRGKLLRAFYYTALLENEEYSPIRPLVDWLNYNGYAMVTKPAKEYTDSMGRRKVKGNMDIELAVDAMELAPRLDHIVLFSGDGDFRPLVESLQRQGCRVSVVSTIRSQPPMIADELRRQADNFIELEALRDVIGRPPREPREDELEAGN				23.6274	23.8005	23.9108	23.1984	23.3661	23.4675	23.6028	23.8228	23.7706	23.5592	23.3452	23.4853	21.9569	20.9542	21.9188	23.7796	23.344	23.7321	23.4632	21.61	0.116605	0.110967	0.0938791	0.0887581	0.46394	0.0162313	0.0131662	0.0175367	0.0141407	0.011291	-0.435547	-0.0475033	-0.316343	-2.16959	+		+	+	0.0186725	0.676839	0.0379211	0.00303628	0.388043	0.119203	-1.73404
DMKJLJHC_00550 hypothetical protein	MMRATIFAISAMLALAACDPANQQPKLGPDGLPLQKVYTITSRDAQVIPERVLESVNSLRSARGAPPLTLNADLTTAALAHSKDMAAQNRPWHWGSDGSSPLSRAQRAGYTGNVLGENISETYETEMETLSAWMNVPDTRDVILNPAATQMGFSWYQEPTGKIWWTMVIGN				23.9675	23.9528	23.6166	22.8977	22.9244	22.826	22.9826	23.2447	22.9358	22.9033	23.01	22.9586	23.4285	22.4731	21.8228	23.8456	22.8827	23.0543	22.9573	22.5748	0.162043	0.041534	0.135936	0.0435656	0.65946	0.0169918	0.00956299	0.0109633	0.00995832	0.0220385	-0.962907	-0.791267	-0.888287	-1.2708	+	+	+		0.00123899	0.0061259	0.00170235	0.0571904	0.17164	0.07462	-0.30789
DMKJLJHC_00553 Putative multidrug export ATP-binding/permease protein	MIDAFEKADGPPPQRLGAFFRWCLKGAGGVVTVSGLASILAGAMEVVSAWLLGQVIDAALGSAPGEVLSRNIGLLVLFVCFYLLIRPAAFAVSSATTNLLIAPNILPLVLSRLHRWTMGQSVTFFDNDFAGRIAQKQMQTARAVTDTVSEIVNTALFALASILGSVLLLLGVDLWGALALVLWTIGLGFIIRAFLPHIRGRSRKRAAARAMVTGQVVDTVTNIKTVKLFAHAEYEDRAALAAMARFRGTTIRFGQVQSLYRTVQMAYSGLLPVVLVGGAIVLWTQGETTAGDIATSGAIAIRLAQMSGWVSNALMSLWTNIGEVEDGMHTLARMHDLEDAPDARDLGAVAGAIRFDQVGFAYGRKTGGVERLDLNIADGERIGIVGASGAGKSTLVALL…	K06147	ABCB-BAC; ATP-binding cassette, subfamily B, bacterial		21.3192	20.7183	21.0926	21.4742	21.5891	21.5204	21.345	21.5816	21.242	21.6774	21.1971	21.6808	20.5652	21.7442	21.2586	21.0434	21.5279	21.3895	21.5184	21.1893	0.247801	0.0472039	0.142183	0.227209	0.483817	0.002436	0.00373897	0.00345762	0.00367315	0.00843541	0.484527	0.346163	0.475087	0.145967					0.0531858	0.161769	0.116323	0.72343	-0.138363	-0.00944	-0.33856
DMKJLJHC_00556 33 kDa chaperonin	MSKLSQIAWDDTVLPFQLDRSDIRGRVARLDGVLEEVLSQHDYPRIVEMLVAEVALLTAMIGQTIKLRWKLSIQVRGDGPIRIIATDYYAPTADGAPARIRGWASYDAEALDETADPFSQIGQGYFAILIDQGQGTTPYQGITPLAGGSLSACAEAYFAQSEQLATRFELSFGRSILPGQGESWRAGGVMLQHMPPASPLHIAPEGSGEEGLLNPEDLLDGEEGENWVRANVLLDTVEDMELIGPTVQPTDLLVRLFHEEKPRVFDPQRVEFGCTCSADRVRQSLSIYSARDIGHMTTDDGKVTADCQFCGAHYEFDPETLGFEAVKNADGTPREESDD	K04083	hslO; molecular chaperone Hsp33		21.9742	22.722	22.4337	22.2512	22.3491	22.182	22.1412	22.7642	22.7087	21.5209	22.3491	22.3011	21.6514	21.7776	21.9059	22.3766	22.2608	22.538	22.057	21.7783	0.307953	0.0685538	0.281533	0.379604	0.103876	0.006138	0.006214	0.00766501	0.0053354	0.0126883	-0.115843	0.16142	-0.31959	-0.598317					0.630976	0.613392	0.407488	0.0598255	0.277263	-0.203747	-0.482473
DMKJLJHC_00560 L-threonine dehydratase biosynthetic IlvA	MSEFALSAQSATRALRALFEPTPLQRNAHLSKRFGADIWLKREDLTPVRSYKLRGAFTAMRKLRESNPGADHFVCASAGNHAQGVAFACRHFGVRGTIFMPVTTPQQKIDKTKTFGGDSIEVVLTGDYFDDTLAAAQAFCRESKADFLAPFDDASVIEGQASVAVELLEQMGDTPPDLVILPVGGGGLAAGVTRYLRDMAPETAFRFVEPAGGASLTAAVAQGAPVALPQVNSFVDGAAVAKIGEIPFQNLGWVSPEQVMRAPEDRICLTMLEMLNVEGIVLEPAGALSLDVLPELRDQIAGKRVVCITSGGNFDFERLPDVKERAQRYSGLKKYFILRLPQRPGALRDFLEMLGPQDDIARFEYLKKSARNFGSVLIGIETKQATNFPTLFGKLDAAG…	K01754	E4.3.1.19; threonine dehydratase [EC:4.3.1.19]		22.4516	22.2521	21.8766	22.2819	19.6161	22.1875	22.3152	22.6165	22.6013	22.3097	22.3814	22.4511	21.306	21.2597	21.543	22.1934	21.3618	22.511	22.3807	21.3696	0.23838	1.23505	0.138581	0.0577486	0.124082	0.00540614	0.00333246	0.00752281	0.00667739	0.00955798	-0.831607	0.317573	0.18727	-0.82387				+	0.402728	0.178687	0.341006	0.0122962	1.14918	1.01888	0.00773667
DMKJLJHC_00561 hypothetical protein	MTAWAIFRHAFRQVTHNLPAVARVSLVPWALGVLLLFAGILGAGMMSASGTGFRMGAGGVFLVIVGYIFFAALFTSIAVNWHRFVLLNEPVTWWPRFHGGRILRYFGRSLSIGIGLGLVFGIALGIAIALSHDGTSGGLVTATVMMIVASVVLGPVAWRCFASLPGAAVDGYSLWKVLDMTRGTWGTMFLLTLIYIGFSILIWLIGMILAALGAKVFLFLIVKILWDLAVGWFTMMLVLSILTTIYGHYVEGRELV			K01548	21.9825	21.393	21.2323	21.7133	21.4727	20.4037	19.7795	20.2157	20.4074	20.0684	21.6265	21.5787	21.9572	21.8727	21.9722	21.5359	21.1966	20.1342	21.0912	21.9341	0.322512	0.569166	0.262738	0.723492	0.0438169	0.00342738	0.00297178	0.00144836	0.00273169	0.0141349	-0.339377	-1.40179	-0.44473	0.39811		+			0.50384	0.00886869	0.471641	0.158716	-1.06241	-0.105353	0.737487
DMKJLJHC_00562 Argininosuccinate synthase	MSAPKKVVLAYSGGLDTSIILKWLQTEYGCEVVTFTADLGQGEELDPARKKAELLGIKPENIFIEDVREEFVRDFVFPMFRANAVYEGLYLLGTSIARPLISKRLVEIARETGADAVAHGATGKGNDQVRFELAAYALDPAIKVIAPWREWDLSSRTKLLEFAEANQIPIAKDKRGEAPFSVDANLLHTSSEGKVLENPADMAPDYVYQRTNDPLSEAPDEPEYVEIGFERGDAVSINGQTLSPATILTQLNALGKTHGIGRLDFVENRFVGMKSRGVYETPGGAILLEAHRGIEQITLDSGAGHLKDSIMPRYAELIYNGFWFSPEREALQALIDKTQEYVTGTVKLMLFKGSARTVARWSDHSLYSEAHVTFEEDAGAYDQKDAAGFINLNALRLKL…	K01940	argG; argininosuccinate synthase [EC:6.3.4.5]		27.9577	28.0653	27.9752	27.3351	27.4956	27.3847	27.7607	27.4698	27.6752	27.4077	27.4038	27.3603	25.6087	23.7939	25.8583	27.9994	27.4051	27.6352	27.3906	25.087	0.0471335	0.0671225	0.122081	0.0215079	0.920003	0.302449	0.219775	0.262376	0.215145	0.125725	-0.59426	-0.364157	-0.6088	-2.9124	+	+	+	+	0.000511378	0.0170263	7.68064e-05	0.011066	0.230103	-0.01454	-2.31814
DMKJLJHC_00564 Ubiquinone biosynthesis O-methyltransferase	MAEAANSIDPDEVAKFEAMAAEWWDPNGKFKPLHMLNPCRLDYLTGQIATQFNRDLTGTRPFEGLRLLDIGCGGGLLSEPMARLGADVVGADAASGNIPVAQLHAEQSGLEIDYRCCAAEDLAAAGETFDVVLAMEIIEHVSDPQGFADTISQLLKPGGVMICSTLNRNPKSYMMAIFGAERVMRWLPVGTHEWSKFITPDELYELSRKAGLSPVDRRGMVFNPLSWRWSLSERDLSVNYAIAAVKP	K00568	ubiG; 2-polyprenyl-6-hydroxyphenyl methylase / 3-demethylubiquinone-9 3-methyltransferase [EC:2.1.1.222 2.1.1.64]		21.9602	21.8776	22.3116	19.4678	22.1351	21.9323	22.2472	21.882	21.8756	21.3822	21.7841	21.6807	22.1378	22.1729	22.3185	22.0498	21.1784	22.0016	21.6157	22.2098	0.188156	1.2124	0.173676	0.170379	0.0782488	0.00489389	0.00293463	0.00528494	0.00392919	0.0171114	-0.8714	-0.0481933	-0.434167	0.159927					0.372003	0.803263	0.0728479	0.329274	0.823207	0.437233	1.03133
DMKJLJHC_00565 Proline iminopeptidase	MGDGHVIYVEQSGHPQGQPVVVCHGGPGGGCSPTMRRFFDPAHYRIILFDQRGCGLSRPHASVEANTTWHLIADMERIRETLDIPAWIVFGGSWGATLALLYAQTHPDRAEALVLRGVFLATQAELDWFYGGGAGRFYPDLWANFLRPIPEDEHGDLIGAYHKRLFCGDYVKEARYGRHWAMWENALASVRFDGPPGEASPDYARAFSRLENHYFQNKAFLEVDGQILRDRKRIEHIPTTIVQGRLDMICPPVSAYRLAQDWPRADLQLVSAAGHALSEPGITRGLVHAMDTLRS	K01259	pip; proline iminopeptidase [EC:3.4.11.5]		19.6925	20.0725	19.5484	20.1768	20.0715	20.0802	20.2212	20.4769	20.2537	19.4873	19.6923	20.8336	21.751	20.7715	21.9353	19.7711	20.1095	20.3173	20.0044	21.486	0.221063	0.0477388	0.113677	0.592294	0.510757	0.00100854	0.00139884	0.00164437	0.00128609	0.010361	0.338363	0.54616	0.233297	1.71484		+		+	0.101817	0.0359686	0.629322	0.0120857	0.207797	-0.105067	1.37647
DMKJLJHC_00567 Ribosome maturation factor RimP	MTDLIAKTAIDRRLADIVIPVIEGLGFELVRLRLQGGKTATLQIMADRPEGGIVVDDCAKISTAVSATLDVEDPIEDNYTLEVSSPGIDRPLTRLKDFEMWQDHEAKIETDEMIDGRKRFKGMLRGIEGSEILIEIENQGEQVVIGLQFDWLSDAKLVLTDELITEMLRQKKAEGLINEDEFDEIDESPDEET	K09748	rimP; ribosome maturation factor RimP		19.4607	22.06	23.3274	20.9141	20.1362	20.0647	20.2664	20.5005	20.8709	21.2873	21.1644	21.2363	21.4933	22.1202	22.3975	21.616	20.3716	20.546	21.2293	22.0037	1.60952	0.384687	0.248878	0.0503935	0.378205	0.00362302	0.0016776	0.0019268	0.00300608	0.0148337	-1.24439	-1.07008	-0.386727	0.38764					0.347522	0.405386	0.751216	0.756857	0.174303	0.85766	1.63203
DMKJLJHC_00568 Transcription termination/antitermination protein NusA	MAITSANQLELLQTAEAVAREKMIDPELVIEAMEDSLARAAKSRYGAEMDIRVSIDRKTGRATFTRVRTVVDDDLLENYQAELTVAQAKQYLDAPAVGDEIVDEVPPVDLGRIAAQSAKQVILQRVREAERDRQYEEFKDRAGTILNGVVKREEYGNIIVDIGRGEAILRRNEKIGRESYRPNDRIRAYVKDVRREARGPQVFLSRTDPQFMAELFKMEVPEIYDGIIEIKAVARDPGSRAKIGVISYDNSIDPVGACVGMRGSRVQAVVGELQGEKIDIIPWNEDQATFLVNALQPAEVSKVVIDEEAGKIEVVVPDEQLSLAIGRRGQNVRLASQLTGLDIDILTEAEESQRRQAEFALRTKLFVDSLDLDEFFAQLLVAEGFTSLEEVAYVDMEEL…	K02600	nusA; N utilization substance protein A		26.8743	26.6717	26.8492	26.3903	26.2712	26.2092	26.6668	26.6959	26.5829	26.0696	26.162	26.3198	24.6291	21.5003	24.4939	26.7984	26.2902	26.6485	26.1838	23.5411	0.0901923	0.0751471	0.0479075	0.103293	1.44414	0.131559	0.101476	0.132404	0.0932076	0.0430582	-0.508177	-0.14987	-0.614613	-3.25733	+		+	+	0.00360644	0.106582	0.00317215	0.0334187	0.358307	-0.106437	-2.74916
DMKJLJHC_00569 hypothetical protein	MSRGGRVKENDDPERRCIVTGDVQPKAGLVRFVLGPDGLIYPDVAEKLPGRGIWVTCERGTIETAIKKGLFARAAKAPAETPENLVEMVETALASRVVELISLVRKSGKAVIGFEKVKGWLAEGRAKVLLQASDGSDRGKGKLWTPEGGRWFGCLTSQELGLAFGRDRAIHGALAAGGLTPRVIEDASRLAGLRKQDGGQTAMKDTKTA	K07742	ylxR; uncharacterized protein		21.6566	21.4951	21.9873	20.5456	21.8203	19.6596	22.3468	20.2926	20.1513	21.9216	19.8887	19.6709	22.3006	22.1142	21.9691	21.713	20.6752	20.9302	20.4937	22.128	0.204847	0.886862	1.00333	1.01356	0.13568	0.00387491	0.00207042	0.00251484	0.00180536	0.0161687	-1.03784	-0.782793	-1.21929	0.414993					0.182147	0.340493	0.170731	0.0752833	0.255043	-0.181457	1.45283
DMKJLJHC_00570 Translation initiation factor IF-2	MSDTDGKKTLGLGAASRPGQVKQSFSHGRTKNVVVETKGKKRVVNKPSAGAGKGPGGGKPAGGDPSRRPAGISDAEMERRMKALQAAKAREVDEAKAREADEKAREEERERRRAEMEAKEREDREREDALKAKAEEDERKKREAELRDKKKEEIRKGGPKKDEVPDQAAVEAAAARAETKGVVASGPRKTDRERDTRNERDNRAGKGKTDGGGNRRTGKLSLNEALGAGEGRQRSMAAMKRKQERQRQKAMGGATRAEKQVRDVQLPETIVVSELANRMAERSADVVKSLMNMGMMVTANQPIDADTAELVIEEFGHRTVRVSDSDVEQVIDQVDDKPEDMQTRPPIVTIMGHVDHGKTSLLDAIRKANVVSGEAGGITQHIGAYQVTTESGAVLSFLD…	K02519	infB; translation initiation factor IF-2		27.6032	27.6079	27.5393	26.7035	26.5053	26.698	26.6816	26.5579	26.7017	26.614	26.6753	26.7249	25.0163	23.8529	24.8904	27.5835	26.6356	26.6471	26.6714	24.5865	0.0312696	0.0921673	0.0636101	0.0453792	0.521289	0.226699	0.128921	0.13227	0.130689	0.0888723	-0.947893	-0.936393	-0.912053	-2.99695	+	+	+	+	0.000161021	4.83186e-05	1.97537e-05	0.00125338	0.0115	0.03584	-2.04906
DMKJLJHC_00573 Arginine biosynthesis bifunctional protein ArgJ	MAKKKKADKDDKLKAKVKKLRTKAKALKAELAAVAPAKIKSKTLAVSPLAPKSFPDLPQIGGVEFASAAAGVRYAGRTDVMLARVAPGSAIAGVFTTSSTRAACVLDCQAKLAMRVPQDAGAAIIVNSGNANAFTGQAGQSAVDAVTGAVAEALDMPASRVFSSSTGVIGEPLPYEKIVEAVTGLKDSLSPAGIEDAARAIMTTDTYPKGAMAEIEGDGGTIRIAGIAKGSGMIAPNMATMLVYLFTDARISADRLQKMLSRQVDDTFNAITVDSDTSTSDALIVAATCQSKAAEISDLRSAEAKAFEAALRSVMMDLAHQVVRDGEGATKFVEIRVTRAASKEDAHKVAMSIANSPLVKTAIAGEDANWGRVVAAVGKSGAQADRDKLKISFGDMVLA…	K00620	argJ; glutamate N-acetyltransferase / amino-acid N-acetyltransferase [EC:2.3.1.35 2.3.1.1]		25.7726	25.5964	25.817	24.8374	24.88	24.8879	25.0342	24.9839	25.0114	24.8181	25.0511	24.9482	24.9793	21.4354	21.4157	25.7287	24.8684	25.0098	24.9391	22.6101	0.0952578	0.0221761	0.02056	0.0953096	1.67527	0.0626751	0.0378751	0.0425201	0.0393337	0.0225843	-0.86024	-0.718847	-0.789543	-3.11855	+	+	+		0.000240199	0.000477034	0.00115795	0.0582874	0.141393	0.0706967	-2.25831
DMKJLJHC_00574 putative parvulin-type peptidyl-prolyl cis-trans isomerase	MKSYLASAAVIALIGGAAMADDAKAPAAASDAPKADAAQSDAAAKPRTDLKANTVVATVNGQDITLGQMITVRDGLPAQYQSIPADKLFDGVLNQLIQQTALAEIGEKRMTQRDKIALEVQKRAYLAGSLLNYTADKAVTDAALKKAYEAKYADAKPTKEYHAAHIIVKTKDEAEKIKKEIDGGADFAAEAKKYSTDGSASNGGDLGWFKLDAMVKPFADALTDMKDGQIKGPIQTQYGWHVVKLIGTKMVDAPKLADVKDKLADEIRQAAVEKRVTDVVDAAKIDKMTKGIDPSVLNDQSILDK	K03769	ppiC; peptidyl-prolyl cis-trans isomerase C [EC:5.2.1.8]		26.0364	25.9221	26.1416	25.7342	25.463	25.7154	25.9056	25.9973	25.8104	25.6831	25.7604	25.5673	25.3978	21.4742	22.4574	26.0333	25.6375	25.9044	25.6703	23.1098	0.0896279	0.123645	0.0762696	0.0793825	1.66693	0.0774127	0.0645473	0.0790502	0.0652922	0.0319323	-0.39581	-0.1289	-0.363077	-2.92353	+		+		0.0214773	0.196316	0.01276	0.0684508	0.26691	0.0327333	-2.52772
DMKJLJHC_00575 Protein translocase subunit SecA	MLGIGTVAKKVFGTSNDRQVKSVRPLVAKINALEAEYEALSDDAIIEKTREFQRRVQDEGESLDSILPEAFANCREGARRALGLRAFDVQLIGGIFLHQGNIAEMKTGEGKTLVATFPAYLNALAGKGVHVVTVNDYLARRDADWMGKVYAALGMTCGVVVPFQPDAEKRDAYAADVTYSTNNELGFDYLRDNMRTSVEEMAQRGHFFAIVDEVDSILIDEARTPLIISGPSDDRSDLYKTLNVYIPQLEEGDYEVNEKDRNATFTEEGNEHLEQILLAAGILPEGQSLYDPESTTIVHHANQALRAHKLFFKDQNYVVKDGEIMLVDEFTGRMMKGRRLSDGLHQAIEAKEGVEIKPENVTLASVTFQNYFRLYEKLGGMTGTAATEADEFSEIYSLG…	K03070	secA; preprotein translocase subunit SecA		28.1548	27.9637	28.0191	27.2848	27.0562	27.297	27.0801	27.0029	27.0279	27.2666	27.2874	27.4071	24.3627	21.8927	23.4411	28.0459	27.2127	27.037	27.3204	23.2322	0.0802747	0.110751	0.0321542	0.0618873	1.01914	0.31235	0.192329	0.173312	0.204924	0.0347585	-0.83319	-1.00889	-0.725497	-4.81371	+	+	+	+	0.000998187	7.90162e-05	0.000536156	0.00264148	-0.1757	0.107693	-3.98052
DMKJLJHC_00578 Chaperone protein DnaJ	MAKRDYYDILGVAKGASADEIKKGYRTKAKELHPDRNKDNPEAEAQFKEANEAYDVLKDPEKKAAYDRFGHAAFEGGMGGGARPGAGYGGGAGQGDFASAFSDVFEDLFGDFMGGRPGGGGGRSRAQRGSDLRYNLRISLEEAFAGTQKTITVPSSAACTSCNGTGAEGGAEPQTCPTCSGMGKVRAQNGFFTVERTCPTCGGQGQVVKNPCRACHGAGRVEVERQLQVNIPPGVETGTRIRHANEGEAGLRGGPSGDLYIFIEVSAHALFERDNVDLHCRVPVSMATAALGGEVEVPTIDGGRSRVKIPSGSQSGRQMRLRGKGMPALRGGGVGDMFIELAVETPVNLTGRQKEILREFQEIEAENNPEGASFFRKVKSFWDGMTQ	K03686	dnaJ; molecular chaperone DnaJ		22.9405	23.1215	23.124	22.6065	23.0564	22.9227	23.0515	22.8152	23.0464	22.7185	22.6194	22.6323	22.2686	21.2691	22.4694	23.062	22.8619	22.971	22.6567	22.0024	0.0859455	0.18863	0.110182	0.043991	0.524965	0.00987076	0.00942589	0.0103481	0.00808521	0.0148203	-0.20013	-0.0909633	-0.405293	-1.05964			+	+	0.243877	0.409359	0.00403669	0.0479702	0.109167	-0.205163	-0.85951
DMKJLJHC_00579 Chaperone protein DnaK	MAKVIGIDLGTTNSCVAIMDGAQARVIENSEGARTTPSIVAYTDDERLVGQPAKRQAVTNPTNTVFAVKRLVGRRTTDAEVEKDRKLVPYDIVDGGNGDAWVQVRGEKFSPAQVSAVILQKMKETAESYLGEEVTQAVITVPAYFNDAQRQATKDAGKIAGLEVLRIINEPTAAALAYGLDKKETKTIAVYDLGGGTFDITILEIDDGLFEVKSTNGDTFLGGEDFDMRIVNYLADEFKKEHGVDLTKDKMALQRLKEAAEKAKIELSSSSQTEINQPFISMGKDGTPLHMVMKLTRAKLESLVNDLIKASMKPCAAALKDAGVTKDEIDEIVLVGGMTRMPKVVAEVTSFFGKEPNKGVNPDEVVAMGAAIQAGVLQGDVKDVVLLDVTPLSLGIETL…	K04043	dnaK; molecular chaperone DnaK		29.2097	29.2292	29.2094	28.4642	28.4376	28.4903	28.667	28.6959	28.6267	28.4345	28.4189	28.4947	27.6314	24.7233	26.5773	29.2161	28.464	28.6632	28.4494	26.3107	0.00923815	0.0215067	0.0283873	0.0326526	1.20211	0.702932	0.457865	0.535024	0.448177	0.293616	-0.75206	-0.55288	-0.766733	-2.90543	+	+	+	+	1.40299e-06	1.26268e-05	5.71795e-06	0.0268297	0.19918	-0.0146733	-2.15337
DMKJLJHC_00581 Glutathione S-transferase	MYTVIGTVGSRTLRVLWMLEELGLEYEHVQAAPRSEDVVAINPAGKVPVLIVEGTPITDSTAILTYLADAHGRFTHRAGTLERARQDSLTQFLLDEFDSNLWTAARHSFILPEELRLSGIKESLRWEFERSQRTLIRRMGGGDFVMGGEMTVPDILLGHCLEWAVMAKFPIISESLTAYHQRMRARPAFKRAVARREASGSQDAGS	K00799	GST; glutathione S-transferase [EC:2.5.1.18]		24.4296	24.3661	24.4671	23.6896	23.8199	24.2997	24.6112	23.8787	24.251	23.8311	24.1424	24.106	21.4889	21.5688	20.8595	24.4209	23.9364	24.247	24.0265	21.3057	0.041686	0.262366	0.299076	0.138932	0.317194	0.0253172	0.0198509	0.0250586	0.0208946	0.00914419	-0.484517	-0.173917	-0.39441	-3.11517			+	+	0.0613728	0.461065	0.0183745	0.000161147	0.3106	0.0901067	-2.63065
DMKJLJHC_00583 hypothetical protein	MPVLLSIGHGFSAQALTPLLLARGWRVIGTTRSPEKAAILRDQGVEPVIWEGGDLPLEGVTHLMSSVPPGADGDPVLNAASEQIAQASAQFDWIGYLSTVGVYGDHAGGWVDEATPLTPSTRRGQARVEAEAAWGALASAHRLPLHYFRLAGIYGPGRGPFEKVRRGTARRVIKPGQVFSRIHVADIAQVLLASIDRPDPGAIYNVCDDDPAPPQDVIGYAAELLGVPQPPEVDFETAEMSPMARSFYAESKRVRNDKIKQDLGVELLYPDYRVGLRALLDQAG				20.4701	20.6681	20.5966	20.0571	21.3272	20.4476	20.531	21.4999	20.8498	20.4838	19.8146	19.4125	22.3793	21.8603	21.8938	20.5783	20.6106	20.9602	19.9036	22.0445	0.0818727	0.531185	0.403202	0.441859	0.237138	0.00176471	0.00197982	0.00256767	0.00119928	0.0152591	0.03234	0.381923	-0.674683	1.46618				+	0.936274	0.259506	0.100972	0.00116929	0.349583	-0.707023	1.43384
DMKJLJHC_00584 Adenine deaminase	MELENKIKSWPESAARLIAVAAGRDTADLVIRNGIWVNVHTRETLEGYDIAVANGRFAAIAPDLSGAIGPDTEVIEAEGRFMVPGLCDAHMHVESGMLTPAEFAAAVIPHGTTSMFTDPHEIANVLGLAGVKMMHDEALMQPVNIFTQMPSCAPSAPGLETTGFEITPEDVAEAMQWPGIIGLGEMMNFPGVVAGDAQMLAEIAATQNAGKTVGGHYASPDLGAPFRAYAAGGPADDHEGTCEADAIARVRNGMRSMMRLGSAWYDVETQITAVTEKGLDPRNFILCTDDCHSGTLVNDGHMNRVYRHAVECGCDPLVALQMCTINTASHFGLERELGSITPGRRADLILTSDLKTLPVEHVIARGKTVAKNGKLLAECPHFDWPEEARDTVHLGRELT…	K01486	ade; adenine deaminase [EC:3.5.4.2]		24.5075	24.4669	24.4733	24.5386	24.5577	24.4715	24.6356	24.8989	24.8123	24.5967	24.5019	24.5728	24.7434	21.329	22.3125	24.4826	24.5226	24.7823	24.5571	22.795	0.0178471	0.0369851	0.109577	0.0402928	1.43507	0.0264233	0.0298022	0.0363164	0.0301839	0.0256721	0.04001	0.299707	0.07455	-1.68759		+			0.240312	0.0188145	0.0749716	0.17166	0.259697	0.03454	-1.7276
DMKJLJHC_00585 AMP nucleosidase	MNEPLTTQTPEMCDPEQFTDAAAAVARLEALYEEATAFLLGKFNETLSSQRASARFRAFYPEVRITVPSHVKGDSRISFGHVPIPGTYAATITRPDLFRNYLTQQLGLLIKNHGVPVQVGPSTTPMPVHFAVASNPDVAVPQEGVLDFSLRDVFDVPDLMTMNDDIVNGAAGPNPDGSGHLAPFTAQRVDYSLARLSHYTATLPEHFQNHVLFTNYQFYVDEFEAVARRLLSDPALGYTSFVAPGNQEISDPQAEIPGLAKMPQMPAYHLKRPDGQGITLVNIGVGPSNAKTATDHIAVLRPHAWLMVGHCAGLRNSQNLGDFVLAHAYLREDKVLDDDLPVWVPIPALAEVQVALQEAVAEVTQLEGYELKRVMRTGTVATLDNRNWELRDHSGPVHR…	K01241	amn; AMP nucleosidase [EC:3.2.2.4]		26.184	26.1375	26.0642	26.3148	26.1241	26.1893	26.3484	26.4322	26.4203	26.2157	26.1936	26.3975	25.8629	21.3011	24.8768	26.1286	26.2094	26.4003	26.2689	24.0136	0.0493343	0.079128	0.0370046	0.0913777	1.95982	0.0826954	0.0959437	0.111474	0.0988717	0.0597444	0.0807833	0.271733	0.140333	-2.11498		+			0.287718	0.00337838	0.128578	0.201782	0.19095	0.05955	-2.19576
DMKJLJHC_00586 DNA-binding protein HU	MSKPMTKTQLVAALAEAMDADKKTATVALDAITDVITKEVAAGGAVTLPGIGKVYCRERPERMVRNPATGEQMQKPADKQVKVTVAKALKDSVNA	K03530	hupB; DNA-binding protein HU-beta		27.5003	27.3629	27.4328	24.458	24.4913	24.9256	24.3528	24.7531	24.199	24.7849	24.6344	24.7083	26.1008	22.147	25.3344	27.432	24.6249	24.435	24.7092	24.5274	0.0560715	0.213008	0.23353	0.0614569	1.71202	0.204103	0.0319931	0.028546	0.0335392	0.0853025	-2.80706	-2.99703	-2.72279	-2.90461	+	+	+		5.5719e-05	6.05537e-05	1.30321e-06	0.0745127	-0.189973	0.0842667	-0.0975533
DMKJLJHC_00588 Membrane-bound lytic murein transglycosylase B	MPLADPVPATDAATEARFETWLAGFKSRALANGITDATWRRAMADVSYNPKVIERDRYQSEFTKSIWDYLDSAVSPERVATGKQMLREYGPALNAIERKYGVDKEVVVAIWGMESRYGEYRGTTAIIPALATLAYDGRRGEFFSKQLIAALKIIQNGDVDEQHMTGSWAGAMGHTQFIPTSYEAYAVDFNGDGKRDIWSNDPTDALASTAAYLARSGWTKGQPWGVEVVLPQGFNYGLTGKGTTKSPAAWAALGVRSAEGGRIANYGPASILVPAGAKGPAFMIFGNFRAISRYNAADSYVIGVGHLSDRLKGKGPFVQDWPRTGKPLSASQKVELQERLTAAGYDTDGTDGKIGPNTSKAIVAYQRAKGLAPDGYATLELLQTLR			K08305	25.3339	25.3926	25.3625	25.6757	25.539	25.6013	25.4538	25.2088	25.1847	25.5841	26.0281	25.9118	22.9519	21.1965	22.0766	25.363	25.6053	25.2824	25.8413	22.075	0.0239912	0.0558962	0.121573	0.188009	0.716644	0.0486422	0.0631221	0.0513634	0.073511	0.0155854	0.242337	-0.08057	0.478333	-3.28799	+		+	+	0.0048831	0.409862	0.0233944	0.00291516	-0.322907	0.235997	-3.53033
DMKJLJHC_00591 2,3,4,5-tetrahydropyridine-2,6-dicarboxylate N-succinyltransferase	MSNAALETAIEAAWDARDTITPATTGETREAIEDTLNALDSGTLRVAERQDNGDWKVNQWAKKAVLLGFRLKDMEIQDGGPQGGGWWDKVDSKFAGWGENQWKAAGFRAVPNCIVRRSAFIAKGVVLMPSFVNLGAYVDEGTMVDTWATVGSCAQIGKGVHLSGGVGIGGVLEPMQAGPTIIEDGCFIGARSEVVEGVIVREGSVLGMGVYLGQSTKIFDRETGNVSYGEIPAGSVVVSGSLPSTGGVNLYCAVIVKKVDAKTRSKTSINELLRD	K00674	dapD; 2,3,4,5-tetrahydropyridine-2,6-dicarboxylate N-succinyltransferase [EC:2.3.1.117]		25.6855	26.0028	25.9251	25.366	25.6251	25.4059	25.3303	25.4792	25.3865	25.4432	25.3056	25.2962	25.156	23.2184	24.676	25.8711	25.4656	25.3987	25.3484	24.3501	0.135037	0.113929	0.0614219	0.0671957	0.823896	0.0691797	0.0572974	0.0556735	0.0522344	0.0754402	-0.405477	-0.47246	-0.522767	-1.52099	+	+	+		0.0315053	0.0107899	0.00803531	0.0615609	-0.0669833	-0.11729	-1.11552
DMKJLJHC_00592 hypothetical protein	MRDDRRHAFRDSQEDAAAADRIPDTPQTRAPAYRLAFTDTDFLMRDELRPVRLQLELLKPELIMDERGIESTIVMFGGARIPAPENKDQARTPYLAELTRFYEEARKFAQIMTEHSMQNYGRENVICTGGGPGVMEAGNRGAHEAGGQSIGLNIVLPHEQAPNEFVTPDLSFNFHYFAIRKMHFLMRAKAVTVFPGGFGTLDEMFEALTLIQTKRMDKIPFILFGKEFWSEIINWERLKEAGTISPEDLDLVSFVDTADEAVKIIDSWDYESC	K06966	ppnN; pyrimidine/purine-5'-nucleotide nucleosidase [EC:3.2.2.10 3.2.2.-]		23.0341	23.2847	23.6064	23.5927	23.6839	23.8128	23.8982	23.4364	23.7492	23.6586	23.1597	23.6011	20.8605	21.1857	22.4113	23.3084	23.6965	23.6946	23.4731	21.4858	0.234215	0.0902922	0.192416	0.222885	0.667732	0.0117092	0.01681	0.0170874	0.0142381	0.0103602	0.388077	0.386187	0.164693	-1.82257				+	0.0940689	0.145936	0.511142	0.0219161	-0.00189	-0.223383	-2.21064
DMKJLJHC_00596 hypothetical protein	MNNMCLRIATVAALTFGVSQSVAAQESTNRVAAETDWSVFVDDGPKECWGVSKPKKTVNTKDGKVVQVRRGDILLFVTYRPGKAPEISFRGGYPFEDGSTVDLEVGGTTFTLFTDGEGAWAGSPEEDAKVIAALKAGSDVSLTGHSSRGTQTKDTFSLMGFTAATDEAQSRCK				24.3705	24.5044	24.5948	23.9903	24.0396	23.8875	23.4906	23.8097	23.3952	23.9134	24.0842	23.8774	24.1393	22.012	23.764	24.4899	23.9725	23.5652	23.9583	23.3051	0.0921294	0.063347	0.177255	0.0901965	0.927107	0.0265578	0.0203539	0.015621	0.0199302	0.0365605	-0.51743	-0.924753	-0.531597	-1.18483	+	+	+		0.00281715	0.00281438	0.00431021	0.146497	-0.407323	-0.0141667	-0.667397
DMKJLJHC_00597 hypothetical protein	MTAVPMIELWRGGIRESVHTGHAVVFGPGGIELAWGDPEAVIFPRSSVKMIQALPLLESGAADAAGLSESHLAFACASHSGAALHRDSAAQWLAHLGLHEQDLRCGAHMPQDPDEKKRLTCSDEAPCQLHNNCSGKHVGFLTLNQHIGGGSEYVEVSHPIQQSIKTTFEEVTDVTSPGFGIDGCSAPNFATTVTGLARAMQLFAAANPEGSTRERAAARLTRAMASFPELVAGEGRACTELMRAMGGRVAVKTGAEAVYVAILPEQKRGIALKIVDGGTRGAEAAITALLIRLGVLDRNHPVVEKRLSGAQKNWRGLITGEMRLAPGFG				23.8351	24.0142	24.0283	23.7991	23.8087	24.0474	24.6623	24.527	24.3065	23.7223	24.2144	24.0724	22.2921	22.4793	21.2206	23.9592	23.885	24.4986	24.0031	21.9973	0.0879536	0.114833	0.146635	0.206802	0.554508	0.0183838	0.019157	0.0298329	0.0205582	0.0147688	-0.07416	0.539373	0.0438667	-1.96186		+		+	0.508556	0.0111517	0.796184	0.00780711	0.613533	0.118027	-1.8877
DMKJLJHC_00601 Flagellin	MSSILTNNGAMVALQTLKGINSGLATTQSEISTGKSVASAKDNAAVWAISKVMESDVKGFDGISGSLALGESTVAVARQASETVTDLLTDIKGKIVAAQEENVDRGKIQTDIVALTDQIKSVVGAAQFNGLNLIDGSSSDDMNVLSSLDRDASGNVNASKIQVSRQNLSVTTPVTAQNFATGDLGANAPDYLSGGGTTQSSTNDALTAAATAANGGGTETITVGQVAEGIGYEIVLDGLDIKTADGSTANGTRTFQYVASDSDGTADVTRNLLSQMNSFFSAATDGSYTAVLGANANEITITNNSGTDVDVGLRATSGGTAGSDVSTGGLGALANIDVTSDAGATGALSSIDALIEKATDSAAAFGSAEGRIQTQADFIADLSGSMKAGIGALVDANME…	K02406	fliC; flagellin		19.2602	19.7168	19.5516	24.9028	24.0719	23.69	26.6213	26.4755	26.4357	23.2328	23.6047	24.2151	26.2939	21.954	25.4538	19.5095	24.2216	26.5108	23.6842	24.5672	0.188751	0.506329	0.0797651	0.404943	1.87938	0.000841286	0.02419	0.120351	0.0164815	0.0876923	4.71207	7.00133	4.17469	5.05773	+	+	+	+	0.000248424	1.09752e-06	0.000189469	0.0193215	2.28926	-0.53738	0.34566
DMKJLJHC_00606 putative protein kinase UbiB	MRGPHNIWRLIRTGATFVRSRAMHQALEAIDAPPRLRAVAYALSWPFAWLGYKGDESLPPVTRAITALGPAYIKFGQVLSTRPDVVGEELADQLRVLQDKLPPFDTAIAKRMVEQELGTPADTLFMSFSEPVAAASIAQVHAARRADTGEKVAVKVLRPGIERAFRRDLDAFHFAAGMIERLSPASRRLRPTEVVKHFESVVLGELDLRLESAAASQFGANTTQDAGFKVPQPVWHLSARRVMVLDWAEGLPMGDRPALIAAGHDVETLGAHVLQIFLNHALRDGYFHADMHHGNLKVAENGDILAYDFGIMGQIDVYTRRVYAEILMGFIQRDYKRVAEVHFEAGYVPADQDVEEFALALRAVGEPIFGMDAAHISMARLLSYLFEVTERFGMPTRTE…	K03688	ubiB; ubiquinone biosynthesis protein		23.6849	23.3873	23.6187	23.6689	23.4904	23.1723	22.7077	21.4689	22.5232	23.1037	23.4701	23.171	21.1225	22.4098	21.6404	23.5636	23.4439	22.2332	23.2483	21.7242	0.127563	0.205399	0.545726	0.159234	0.528892	0.0139751	0.01411	0.00620532	0.0121836	0.0122216	-0.11974	-1.33039	-0.31534	-1.83941		+		+	0.522298	0.0283806	0.0941364	0.00876694	-1.21065	-0.1956	-1.71967
DMKJLJHC_00607 Ubiquinone/menaquinone biosynthesis C-methyltransferase UbiE	MSAEKSKTTHFGYQTVDEDAKAGMVHGVFSRVASKYDIMNDLMSVGIHRVWKDAMMDWLVPRSGQKLLDVAGGTGDVAFRFLNRAGSAHATVCDMTESMLVEGRKRAEAESMAESLDWVVGDAMALPFADNSFDAYTISFGIRNVTRIPDALSEAYRVLRPGGRLMVLEFSQIPNELMQKAYDLYSFNVIPKMGELVAGDRDSYQYLVESIRKFPDQERFAGLIRDAGFGNVSYRNLSFGIAALHSGWKL	K03183	ubiE; demethylmenaquinone methyltransferase / 2-methoxy-6-polyprenyl-1,4-benzoquinol methylase [EC:2.1.1.163 2.1.1.201]		23.6202	23.5917	23.9914	23.117	23.47	23.4451	23.2411	22.9576	23.1511	22.9802	23.0333	23.2015	22.16	22.477	21.9353	23.7344	23.344	23.1166	23.0717	22.1908	0.182051	0.160821	0.118286	0.0943348	0.222231	0.0157315	0.0131663	0.0114463	0.0107797	0.0168876	-0.390397	-0.61787	-0.66275	-1.54366		+	+	+	0.0854572	0.0158014	0.0102519	0.00160898	-0.227473	-0.272353	-1.15327
DMKJLJHC_00609 putative enoyl-CoA hydratase echA8	MAYQTLIVEIEDYVALIRLNRPDALNALNAQLLGELADALKSADENDKVRCIVITGSEKAFAAGADIKEMAEKSFVDMFSSDYFANESEAITRTRKPVIAAVSGYALGGGCELALMCDFIICSESAKFGQPEINLGVIAGIGGTQRLTRFVGKAKAMDMHLTGRFMDAAEAERSGLVSRVVPNAKLIAEAKAAASKIAEKSTLATIAAKEAVNRSYETTLREGILFERRVFHALFATEDQKEGMAAFLEKREPQFRDK	K01715	crt; enoyl-CoA hydratase [EC:4.2.1.17]		25.195	25.1443	25.1313	25.1682	25.5275	25.4576	26.1838	25.9263	26.1069	25.7134	25.9145	25.5482	23.9745	21.9477	22.6748	25.1569	25.3844	26.0723	25.7253	22.8657	0.0275064	0.155553	0.107947	0.149792	0.838374	0.042167	0.0541612	0.0888055	0.0678333	0.0269609	0.22755	0.915437	0.568463	-2.29122		+	+	+	0.111301	0.000313276	0.00617558	0.0181029	0.687887	0.340913	-2.51877
DMKJLJHC_00610 30S ribosomal protein S20	MANTPQSKKRARQNERRQDINKARRSRIRTYLRKVEEAIASGDQAAATAALRAAQPELMRGVTKGVVHKNTAARKMSRLSSRVKALSA	K02968	RP-S20; small subunit ribosomal protein S20		24.8322	24.9602	24.7214	22.0072	21.3956	22.2088	22.9644	22.2022	22.1294	21.947	21.3487	21.0076	22.0459	21.7977	21.8461	24.8379	21.8705	22.432	21.4344	21.8966	0.0976056	0.345761	0.377636	0.388275	0.107446	0.0338034	0.00474134	0.00712191	0.00346532	0.0137723	-2.9674	-2.40593	-3.40352	-2.94137	+	+	+	+	0.000307157	0.000951261	0.000274402	8.82603e-06	0.561467	-0.436127	0.0260267
DMKJLJHC_00612 DNA polymerase III subunit beta	MKFSIERAVLLKAVSQAQSVVERRNTIPILANVLIEAEGDTVQFRATDLDIEVVDKANAQVERAGATTVSALMLHEIVRKLPDGALVSIADDPAAGRLSVQAGRSSFNLATLPKEDFPVMASSEYAANFVAKAGVLKRLFDKSKFAISTEETRYYLNGVYMHVATGEEGQMLRCVATDGHRLARIDAALPEGASEMPGVIVPRKTVGELRKLLDDEDQDIAVSVSETKVRFATPVITLTSKVIDGTFPDYTRVIPVGNTRQLEVDAKEFAKAVDRVATVSSERSRAVKLTLEADKLVLSVNAPDAGAAEEELVVAYNDEPLEIGFNAKYLQEIADQVDRENAVFLFNSSGDPTLMREGGDTSAVYVVMPMRV	K02338	dnaN; DNA polymerase III subunit beta [EC:2.7.7.7]		26.7992	26.5901	26.6827	26.4804	26.3337	26.7149	26.9606	27.0256	26.904	26.4634	26.8809	26.7993	26.9902	23.5974	25.85	26.6907	26.5097	26.9634	26.7145	25.4792	0.0855703	0.156976	0.0496667	0.180673	1.4097	0.122092	0.118147	0.164695	0.134654	0.165002	-0.18098	0.272733	0.02387	-1.21146		+			0.22552	0.0175657	0.874101	0.291828	0.453713	0.20485	-1.03048
DMKJLJHC_00616 DNA gyrase subunit B	MAENIPNNNSYGANSIKVLKGLEAVRKRPGMYIGDTDDGSGLHHMVYEVVDNGIDEALAGHADYVTVKIHADSSVSVRDNGRGIPVDMHEEEGVSAAEVIMTQLHAGGKFNNTDTDGNAYKVSGGLHGVGVSVVNALSDWLELTVWRDDKIYQARFEHGECVEHVHVVGDAPGEKGTQVRFMASNKETDPEEGTFSNLDYSFTTLEKRLRELAFLNSGVRILIEDERPAEPLHVELHYDGGVREFVKYLDRSKTSVMPEPIYMVGEVRGIGVEVALWWNDSYHETVLPFTNNIPQRDGGTHMAGFRAALTRTITKYAQESGIAKREKVDFTGDDAREGLTCVLSVKAPDPKFSSQTKDKLVSSEVRPAVENLVNQKLAEWFEENPTEAKQIVGKIVEAA…	K02470	gyrB; DNA gyrase subunit B [EC:5.99.1.3]		27.139	27.0153	27.1484	26.7223	26.384	26.5819	26.2297	25.9406	26.028	26.5968	26.8874	26.737	22.629	19.6252	23.3794	27.1009	26.5627	26.0661	26.7404	21.8779	0.0606415	0.138798	0.121049	0.118673	1.62207	0.162247	0.122573	0.0884221	0.137087	0.0135949	-0.538157	-1.03482	-0.360517	-5.22303	+	+	+	+	0.00736116	0.000415522	0.018687	0.0104133	-0.49666	0.17764	-4.68488
DMKJLJHC_00617 Biotin synthase	MDLLFRAHGVHRANFHPNRIQCAKLLSIKTGGCPEDCAYCAQSARNGSALSASKLMEVERVLTEARRAKAAGATRYCMGAAWRSPKQRDMPAVIAMVEGVKAMGLETCMTLGMLDDEQVMQLKQAGLDYYNHNIDTSEGFYSSIVSTRSFADRINTLERVRQAGINVCSGGILGMGETKDDRISMIQTLADLPEPPKSIPINLLIPMPGTPMADAPPLDPFELVRAIATARILAPSSYVRLSAGRSAMSDELQAMCFFAGANSIFVGDTLLTAGNPEDSKDAKLFARLGLKPEALQETADQP	K01012	bioB; biotin synthase [EC:2.8.1.6]		21.711	21.7426	21.6248	19.9132	20.5819	20.0969	20.5607	19.9248	20.0679	19.7834	20.7924	20.1444	21.8466	21.9894	21.9937	21.6928	20.1973	20.1845	20.2401	21.9433	0.0497756	0.282068	0.272395	0.417466	0.0683526	0.00382107	0.00148668	0.00149976	0.0015143	0.0142255	-1.49548	-1.50834	-1.45274	0.25045	+	+	+	+	0.00179346	0.00152805	0.00812124	0.0138196	-0.01286	0.0427433	1.74593
DMKJLJHC_00619 ATP-dependent dethiobiotin synthetase BioD 1	MTSPIVVTGTDTDIGKTVFSAALTLALQASYWKPVQAGLDEETDSETVARLTGRPTLPEAWRLRTPASPHLAAQLDGVEIGPLELPQVTGSLVIEGAGGALVPLNGPRLYADQMAEWGAPVIVVARTTLGTINHSLLTVEALRARDVPLVGIAFVGDEMADSQDTICRIATLPMLGRLPLISDLTIQTLRDAAQRLDLDRIAGALQ	K01935	bioD; dethiobiotin synthetase [EC:6.3.3.3]		21.8075	21.5478	21.6618	20.0148	20.051	20.578	20.1359	21.0331	20.2156	21.7578	21.1184	20.3515	22.6175	21.6911	22.1684	21.6724	20.2146	20.4615	21.0759	22.159	0.106292	0.257399	0.405464	0.574935	0.378248	0.00376729	0.00150456	0.00181728	0.00270284	0.01652	-1.45778	-1.21084	-0.59647	0.486633	+	+			0.00177601	0.0150335	0.222566	0.154726	0.246937	0.86131	1.94441
DMKJLJHC_00620 Adenosylmethionine-8-amino-7-oxononanoate aminotransferase	MTDIAFEQAHVWHPYTERALPQRLHKIVAAEGIWLTCDDGRRMIDAMSSWWAVAFGHAPAPLVQALKDQAEILPHVMFAGLTHQPVIDLTRHLVAAMPAGLDQIFYSDSGSVSVEVAVKMATQSQVNRGNPHRTDFATARGGYHGDTWKAMSLSDPETGMHTQFGRALQAQHFVSRPPIPYDALWSEDPARNGLAEVETLFRTHGDRIAAFIIEPIVQGAGGMHFHHPGYLRGLRALCDHFGIHLIFDEIATGFSRTGADFAMETAGVTPDILCLGKALTGGLMTLAATITTKELAANVGALMHGPTFMANPLACAVASAAMDLWKGRDWSARARAIETQLAIELAPARAITGVRDLRTLGAIGVIEMDAPLPVERVHRVCVESGVWLRPLGRLLYAMP…	K00833	bioA; adenosylmethionine---8-amino-7-oxononanoate aminotransferase [EC:2.6.1.62]		21.3505	21.1872	21.8201	20.6563	19.9073	20.1555	20.0321	20.5024	21.1161	19.5545	20.0365	19.7608	22.3939	22.5404	21.0068	21.4526	20.2397	20.5502	19.7839	21.9804	0.268272	0.311552	0.443827	0.197489	0.691011	0.00323491	0.00153098	0.00193245	0.00110381	0.0145959	-1.21287	-0.902397	-1.66865	0.52779	+		+		0.0140088	0.0696321	0.00209631	0.370929	0.310473	-0.45578	1.74066
DMKJLJHC_00630 Hydroxypyruvate reductase	MKVHILDDWFDTLRHLPCFKILDGHDVTVWTDHEPDEAALAVRLADADCVVLFRERTKVTRGLLERLPNLRLISQRGTWPHVDVEACSARGVLLCSNTGGDGANFAAAELSFALMLAAMRQLPQQMASVKSGNWQMGVGRGLRGRVLGLYGYGRIGRAVADYARAFGMEVIWWASEAGRARAMADGATVAESRAAFFAQSDIVSLHLRLTPETRGIVTAEDLAQMSPRSVLVNTSRAGLIAPGVLLGALKAGRPGQVAVDVFDREPETNAADPLLAHPNLIATPHIGYVTEDEFDKQFSDIFAQVKAYAEGAPIHMVNPSAAAR	K00058	serA; D-3-phosphoglycerate dehydrogenase / 2-oxoglutarate reductase [EC:1.1.1.95 1.1.1.399]		21.4879	21.5644	21.5855	21.3722	21.8727	20.0095	22.5947	21.2815	21.9398	21.2646	21.1561	21.7965	22.2189	22.3471	21.6579	21.5459	21.0848	21.9387	21.4057	22.0746	0.041944	0.787363	0.536124	0.279815	0.299276	0.00345115	0.00275024	0.00505928	0.00339711	0.0155815	-0.46112	0.392753	-0.140187	0.528707					0.454685	0.360021	0.522112	0.0686371	0.853873	0.320933	0.989827
DMKJLJHC_00646 hypothetical protein	MKRVLIGAVAALALGTGAALADGYPSKEIQGVIQWGAGGSTDTVMRSVTPHAEKTLGGTVVMQNMTGGVGAIALNSVASKPADGYTLLMGAENPLLYKVMGLGQKDYSDFTPVDILARGTAVLVARPGVPFDDYKSMIAYIKAHPDEVRFGATGPGGLPSVVTAMMDSVEGKLPVISVPYDGDGPALTALQGGAIDVMPAVLGAALESIRAGKMKPLAVFEEKPNPLLPKVPAVVSFNEGYAKYLPWGPFFGVFVKKGTPEDIVAKLSAAYKAGAESPDFQKLMDGRGYTIMNISGPEAEDFLSKWQSNTTWLLQDAGLTKASPEKFGIPKPGN				26.343	26.4217	26.5204	25.9284	26.1694	25.9639	25.5949	25.9303	25.7464	26.2585	26.0311	26.2339	26.0677	22.0439	23.6569	26.4284	26.0206	25.7572	26.1745	23.9228	0.0725892	0.106225	0.137106	0.101909	1.65347	0.101795	0.0841742	0.0713808	0.0926063	0.0561012	-0.407813	-0.671157	-0.2539	-2.50554	+	+	+		0.0109672	0.00361414	0.0454764	0.0989843	-0.263343	0.153913	-2.09773
DMKJLJHC_00647 hypothetical protein	MSTHIDPDQHDGTSDATPGGYEKQRRPGEAIFALFMLLASLGLLWSAYGIAGFSSLSSPGAIPMATTAVMVIAAATVLIQTVKRPRVPGETFVKNILPGVVVLFVALLVCYGALLEPLGFLPTSAIFLIIAFKVLWRRNWLVTLGVAAFSLLLIWLIFRIVFTVLIPEGIVPEAEIIQFFRNLLSGGTA			K07794	20.894	21.6102	20.7488	19.2632	18.9237	20.0342	18.9466	20.3009	21.0532	20.2972	20.8953	20.2505	21.0954	21.9294	21.4848	21.0843	19.407	20.1002	20.481	21.5032	0.376534	0.464596	0.871631	0.293581	0.340706	0.00250616	0.000859625	0.00141468	0.00178949	0.0104856	-1.6773	-0.984107	-0.603343	0.418887	+				0.0165869	0.216584	0.148455	0.308182	0.69319	1.07395	2.09618
DMKJLJHC_00650 4-hydroxyphenylpyruvate dioxygenase	MKTSIATVSISGNLQEKLEAIAAAGFDGIEIFEQDFLTDDRSPAEIGRIIRDHGLEITLFQPFRDFEGLPASLRSKAFDRAERKFDVMQELGCDLALFCSSVHPEALGGIDRAAADFNELGARAAARGLRVGYEALAWGKHVNDHRDAWEIVRRADHPAIGLILDSFHTLSRGIDPETIRRIPGDRIFFVQLADAPLIDMDLLYWSRHFRNMPGEGDLDVTAFTRAVMATGYSGPISLEIFNDQFRGGRPATIAQDGYRSLVNLMDDIRRKEPGLAPDLAPMPARVSVSGTAFLEFASRADEAEALRDVLRGLGFSRVGRHRSKDLGLWRQGDIRFLINEEDRDFAATAYNVHGTSICDIGLTVSSASDTIARATALGADMFDQPLSPVQVDIPAIRGL…	K00457	HPD; 4-hydroxyphenylpyruvate dioxygenase [EC:1.13.11.27]		23.9229	24.091	24.1033	22.6874	22.3312	20.4717	20.1915	19.8089	21.9134	22.6101	23.1588	22.8558	22.4996	20.9873	21.9342	24.0391	21.8301	20.6379	22.8749	21.807	0.0823191	0.971496	0.915329	0.224376	0.623913	0.0194304	0.00461024	0.00205366	0.00940522	0.0129433	-2.209	-3.40115	-1.1642	-2.23209	+	+	+	+	0.0327701	0.00636728	0.00232756	0.00740641	-1.19215	1.0448	-0.0230867
DMKJLJHC_00655 Vitamin B12-binding protein	MTRKALLVAGCIVASLASGGVRAEPTQYPLEIENCGQTVTFDHAPQHAVALGQNTAEIMLLLGLQDRMAATAFWPNKVLPQLAEANAKVDVLSVEFPTLESILAKKPDFVAAMLVTLLGPDSKVAKRTDFSDLGIPTYLSPSACSTEKMAGNIFGSRDELWSMDLVYQEIDDLSRIFDVQDRGQALIADFKAREATLRAKFAKRPDLTFLFWFSSLSPTEDAYLGGGNGPSGYIANILGGSNAIKTKADWPSVGWEGIIASNPTVIVAAQVDRKRWTLDSAAKKIEFLKSDPTVSQMSAVQAGRIVVMSGAAMNPSIRTLYGAEEVAAQLDKLDLPQ	K02016	ABC.FEV.S; iron complex transport system substrate-binding protein		23.4721	23.3728	23.7161	23.9923	23.7951	23.9424	23.488	23.6731	23.6424	23.7509	24.282	24.1492	21.3302	21.6955	21.2484	23.5203	23.91	23.6012	24.0607	21.4247	0.144233	0.0837198	0.0810083	0.225656	0.194387	0.0135617	0.0194906	0.0160159	0.0213961	0.00993036	0.389637	0.0808633	0.54039	-2.0956	+		+	+	0.0298177	0.527406	0.0462279	0.000255518	-0.308773	0.150753	-2.48524
DMKJLJHC_00656 hypothetical protein	MSDLVPIFDGHNDFLLRLLHDRAARETTWLTQTGEGQLDLPRMKAGGFAGGFFAVYIPSPKAHDAPDLQSLLREPPFALPLPEPVPYEHALPIAMEMAGHLLWMERSGHLSICRTVADIRAAMAAGRIAAILHMEGAEAIGPDLDALHVWHAMGLRSLGPVWSRPTAFGHGVPFAFPSTPDTGDGLTPAGKDLVRACNQLGIMIDLSHLNEKGFNDVAALSDAPLIATHSNAHALCRSSRNLTDRQLAMIRDSDGMVGLNYALSFLREDGAAQPFSGFDPMLRHLDHLIEMLGEDRVGLGSDFDGAEIPPDLGDASGLPRLLDAMRAHGYDAALIAKLAHENWLAALGRVWKE	K01273	DPEP; membrane dipeptidase [EC:3.4.13.19]		21.7426	21.2704	21.8585	21.096	21.9762	21.7482	21.5419	19.5391	18.7054	22.4474	22.4355	21.7834	21.7846	21.9275	21.2196	21.6238	21.6068	19.9288	22.2221	21.6439	0.254384	0.372995	1.19032	0.310217	0.305637	0.00364266	0.00394915	0.00125619	0.00598222	0.0115599	-0.0170467	-1.69503	0.598273	0.0200933					0.959976	0.120253	0.102607	0.946462	-1.67799	0.61532	0.03714
DMKJLJHC_00660 hypothetical protein	MTEKTTIKEIESRLTDDRADLASTLADLAGRIAPDYLSDQMSAMVHDYARPVAKKAEETVRSNPVAFAVAGAGLAWLLLSSRKDKPASDGVRAPLDALAADDLVTEDWLDEIDELRETASDRMHQLELDSRSTLDKTRDFATERAEMVSQFASDLRDTLNTGLHDLSEDARARVVRAREAAYSARLRVQSGVKSAGQSSSQMVKDHPVITAALGIAIGAAIVSVMPKPEFNRRSLGPRANRLIDEAQAAFAEEKRRARRLAGEVGDEMKRAAGSVADTARDEAYKTAQDISDQAISAGKDLSERLAQQLADEATRAIHDVGEHLRDGAKKATATSDKTH			K06958	22.2802	22.0802	22.1928	22.9468	22.3936	23.1418	22.7603	22.6526	22.7257	22.7589	22.5921	22.7056	21.5525	21.6514	22.1062	22.1844	22.8274	22.7129	22.6856	21.77	0.0818749	0.316912	0.0449075	0.0695479	0.241111	0.00537237	0.00920324	0.00865256	0.00824846	0.012616	0.642987	0.52847	0.50115	-0.414357	+	+	+		0.0499156	0.00132178	0.00273469	0.0828203	-0.114517	-0.141837	-1.05734
DMKJLJHC_00663 Cardiolipin synthase B	MDRLRRAGIQPASRTKLLLTAAEAYPVLEAAFLDAREEIHVSFRVFDLETKLFSARGRHVGKTWFDLIVHVLARGLRVQVDLCDFDPCARPDLHRGTWRSMRMLAAARELAGPRAQLTTRALLHPARSGIAVRLAFWPLVMSKLSKHAQWLNEQPEKSRATLLRDMPGLAPHLVPSGQGRYARRLSGLPHLFPATHHQKIALFDAKKLYIGGLDLDNRRYDTPDHERRGERTWHDVQLLMTGPVAREAKAHLETYHEACAGQADAPPPRRLLRTIARRRKRAPFAIGPKSYRFEIVTAHGMLVARAQKLIYLETQFFRSTALAKQLAKAARGTPGLQMILLLPAAPEELAFEHSSDLDVRYGEFLQARALKIVREAFGDRLFVGCPGQPRSARRPAQQE…			K01115	20.429	20.48	20.4972	19.4687	20.2209	20.2279	20.4255	20.2277	20.0373	20.614	20.3918	19.8924	21.1183	21.3384	21.1838	20.4687	19.9725	20.2302	20.2994	21.2135	0.0289514	0.356268	0.158491	0.301785	0.0922633	0.00163567	0.00127213	0.00154805	0.00157788	0.00857803	-0.496233	-0.238533	-0.169307	0.744787				+	0.121091	0.104384	0.473844	0.000403305	0.2577	0.326927	1.24102
DMKJLJHC_00666 putative transcriptional regulatory protein pdtaR	MPEDIAGTIGANLPYLRRYARALTGSQDSGDRFAAATLEAILEDTSPFEDNDPKLGLFHAFHLVWASAGSPLGEPDNRMSASAQDHMASLTPNTREALLLHSIEGFRIEEIATIMQVDSDEAQDLIDIALREMEASIAGKIMIIEDEAIIAMDIRAIVEDMGHTITGVARTRTEAVELAAKEKPDLILADIQLADNSSGIDAVNDILAQFGNDLPVVFITAFPERLLTGERPEPAFLITKPYTEAQVQSAVSQAMFFSSTESLAA				23.3703	24.0063	24.2282	24.4662	24.4476	24.3494	24.4404	24.5232	24.3008	24.7321	24.5262	24.4094	24.7648	22.692	21.0666	23.8683	24.4211	24.4214	24.5559	22.8411	0.363594	0.051226	0.0917886	0.13337	1.51343	0.0172606	0.0277769	0.0282798	0.0301579	0.0265065	0.55281	0.55319	0.687637	-1.02711					0.100304	0.105282	0.0659875	0.403536	0.00038	0.134827	-1.57992
DMKJLJHC_00667 Xylulose kinase	MYIGLDLGTSGLKALLIDDAQTVLAEASAPLSVTRPADGWSEQAPADWIAAAEQALEALSVHDLSGVRGIGLSGQMHGAVLLDASDTVLRPCILWNDTRAYQEAKALDADPKFREITGNIVFPGFTAPKLVWVARHEPELFSKVAKVLLPKDYLRLWLTGEHVAEMSDAAGTSWFDTGARDWSDALLAKTGLSRAQMPRLVEGSAISGALRPELSARFGIGKGAVVAGGGGDNAASGIGVGVVKAGQAFVSLGTSGVLFAANDGYQPDPETAVHTFCHAVPGSWHQMGVILAASDALNWFAKLIGTDAETLTSGLGALRAPSKTLFLPYLGGERTPLNDAAIRGAFIGLEHATDREAATRAVLEGVSFAFRDCRDALAATGTQIESLLAVGGGSRSDYW…	K00854	xylB; xylulokinase [EC:2.7.1.17]		25.7937	25.6521	25.6283	24.9101	24.9059	24.901	25.6745	25.536	25.5687	25.1408	25.0229	24.9019	23.9612	22.1676	22.3483	25.6914	24.9056	25.5931	25.0219	22.8257	0.0729899	0.00373196	0.05909	0.097521	0.806295	0.0610752	0.038865	0.0637048	0.0416556	0.0262244	-0.785713	-0.0982833	-0.669493	-2.86565	+		+	+	0.000109126	0.212958	0.00147701	0.00745985	0.68743	0.11622	-2.07994
DMKJLJHC_00668 L-glyceraldehyde 3-phosphate reductase	MSYRPADERYSNMVYRRCGRSGLKLPAVSLGLWHNFGEDTPHRTKREICRTAFDHGITHFDLANNYGPPPGSAETAFGEILRTDFAGYRDELIISSKAGYLMWDGPYGEWGSRKYLISSCDQSLKRMGLDYVDIFYSHRFDPDTPLEETMGALEHIWRSGRALYIGISSYNTQRTREAADILREMGVPLLIHQPSYNMLNRWVERDGLTDTLDDLGVGSIAFTPLAQGMLTRKYLGGIPEGARAAQGKSLNPDMLTPEALAKIRALDEIAQARGQTLAQMAIAWVLRGGRITSALIGASKPEQVIDCAGAVSNLEFTQAELDAIDSHAQDEGINLWARSSETE	K19265	gpr; L-glyceraldehyde 3-phosphate reductase [EC:1.1.1.-]		24.7217	24.6969	24.6582	24.0592	24.3249	24.3282	24.9466	24.8072	25.0288	24.5271	24.4748	24.3209	23.1207	21.8022	22.1039	24.6923	24.2374	24.9275	24.4409	22.3422	0.0260999	0.126028	0.0914662	0.0875424	0.564062	0.0305571	0.0244569	0.0401627	0.0278477	0.0187573	-0.45486	0.23525	-0.251367	-2.35003	+	+	+	+	0.00750041	0.0249475	0.0176688	0.00416567	0.69011	0.203493	-1.89517
DMKJLJHC_00670 Translocation and assembly module TamB	MKHFLLILALAFAPLAGFAQDTTSSAKDAGAGAATDAQTQRDRSYLTGLLEDSLSGAGRTVRLDGFKGALSSRATFTSLSISDDQGAWITIKNGAISWNRTALLRGRIEIDELSAEEIDLPRLPSASSTSADAPSPEAKPFSLPDLPVAVNIGKIDAKKVVIGKPVIGEDMTVKLNGSLSLAGGEGKAKLDINRIDGKKGVFSLTSSYDNSTKVLGLDLLVDEGKNGLISRLAGIPGQPALTLAVSGDGPLSKFSADVVLSTDGARRLAGKVVVNQSVPKGAPEGSAPETGFSAAFSGDVTPLLPPDYHEFFGKEASFVVEGARTASGQTRLSTLDIKSRALDLQGSADIGADNLPTKFDLTGQLGLGDGQEVLLPISGTKTWVQSGNIKLTYDKANGD…	K09800	tamB; translocation and assembly module TamB		25.3377	25.3001	25.3718	25.4865	25.3113	25.6729	24.9359	25.1266	24.9602	25.4091	25.0466	25.1882	21.778	21.3969	22.0763	25.3365	25.4902	25.0075	25.2147	21.7504	0.029266	0.147622	0.0847397	0.149159	0.278051	0.0477583	0.0582818	0.0424531	0.0476111	0.0124452	0.153693	-0.328983	-0.121873	-3.58614		+		+	0.222163	0.00656288	0.32019	5.43125e-05	-0.482677	-0.275567	-3.73984
DMKJLJHC_00671 Translocation and assembly module TamA	MSSKHFKQLTLGMALGAVSAWPVSAYDLTFNTPGASKSLRDSITGASLLESSSSDKSKDAQEIFAAARADYNRIVSTLFSEGYYSGVVSIKLDGREAASISPLDAPSSIKNVVVSVTPGPDFHFSRASIGPVAPESDLPEGFATGKVAKSGVIVQAASSAVSGWRDDGHAKAKVADQSIVADHRKDTIAADIRMAPGPLVHFGTLDVSGNTRLRTKRLREIAGFPTGKVFDPKELDQMQARLRRTGIFSSVAVTEAPTLGPDNSMDVGLAVVEQKKRKIGVGAEINSDDGLGLNASWLHRNLFGGGERFTIDGAVSGIGGSTGGGLDYSLGTRLERPATFNPDTSAYLEAQAARKDQEDYTQNGFNIGFGVSRIFNDKLTADTAIKYGWSKVTDDAGTT…	K07278	tamA; translocation and assembly module TamA		25.8589	25.9435	25.7609	25.8314	25.8712	25.6237	25.5422	25.721	25.7815	25.6322	25.7204	25.7954	25.64	21.4406	24.3913	25.8544	25.7755	25.6816	25.716	23.824	0.0746057	0.108517	0.101586	0.0667036	1.76072	0.0683837	0.0710226	0.0677349	0.0673959	0.0523865	-0.0789733	-0.172853	-0.13841	-2.03044					0.444153	0.124449	0.122126	0.178563	-0.09388	-0.0594367	-1.95146
DMKJLJHC_00672 Protein-export protein SecB	MSDEVNGAEGAEQQLRMNILAQFVRDMSFENNVALKGLQAGDISPEMQVQVSLDAKKRSQDNQYEVISKFKITATNKTDNTTLYLMELDYGGIFHIEGVPEDQLHPFLLIECPRQLFPFVRRIVSDVTRDGGFPPFNLEIVDFVGLYRNELARRQQAEAEV	K03071	secB; preprotein translocase subunit SecB		25.2098	25.4563	25.0137	24.4315	24.5577	24.6757	24.2719	24.5647	24.3514	24.6709	24.6878	24.5438	25.132	21.5858	23.797	25.2266	24.5549	24.396	24.6342	23.5049	0.181096	0.0997128	0.123622	0.0642732	1.46238	0.0442551	0.0304779	0.0277846	0.0318395	0.0419926	-0.671677	-0.830657	-0.592443	-1.72169	+	+	+		0.0100703	0.00585605	0.0120616	0.173805	-0.15898	0.0792333	-1.05001
DMKJLJHC_00674 hypothetical protein	MSGAVIQLIVLAAIAIFLIFKLKNVLGTREGFEKPATPLEEPIPQAKRDFEVIEGGPDPDIVDHVDEGSTAAIALSAMKRVEPQFSVSEFLKGARGAYEMILMAFERGDIEQIKPFLSAEVYEAFEGAVAARKEQGLDVHAEFLGLRELVLSGADFDHATNDSEITVRFGGELISVARNAQGEIVEGDPKVARKQRDIWTFARRMGSDDPNWQLVATGG				22.982	22.9318	23.0278	23.2271	23.2041	23.3359	23.859	23.989	23.6411	23.3378	22.9995	23.1331	21.8615	21.5822	21.6536	22.9805	23.2557	23.8297	23.1568	21.6991	0.0392101	0.0574977	0.143548	0.139126	0.11848	0.00932882	0.0123845	0.0187647	0.011435	0.0120108	0.275167	0.849157	0.176273	-1.28141	+	+		+	0.00501939	0.00128066	0.159683	0.000130792	0.57399	-0.0988933	-1.55658
DMKJLJHC_00677 hypothetical protein	MHRILLLLVLVALSACAPRGRLAYLNHPDPAAREIYVGTTRAPDLETGNPFGWGRSLDLRLARFAVATPPDHTIGKIDYPKAGERADPGTQFMISSAQIDMKQSLFRADLHAALQRNGGQAVVFVHGFNNDFSEGLYRMAQLGTDFNIPGVLVHYSWPSRANVLGYAYDRDSVLFARDGLVHLLDELKASGATHIMLIGHSLGAELTMEALRQEALARDQSLLSRLNGVILVSPDIAVDVFKTQVRTIGKLPQPFVIFTSQKDRALRLSARLTGQSDRLGNLENVDRLAQYRITVINTAAFNTGDGHFNVADSPALIRILDRAGNIAKVLEGDQKGRTSLASGVVLTVENATQIVLRAQSGG				21.5745	21.1909	21.1135	20.553	20.4923	20.5285	20.5128	20.5381	20.4732	21.0204	20.284	20.7988	21.758	21.5493	21.3034	21.293	20.5246	20.508	20.7011	21.5369	0.201595	0.0249423	0.0267207	0.30847	0.185764	0.00289613	0.00186522	0.00187681	0.00208442	0.0107334	-0.76838	-0.784947	-0.591897	0.24393	+	+			0.00588762	0.0054747	0.085582	0.27669	-0.0165667	0.176483	1.01231
DMKJLJHC_00678 ATP-dependent protease ATPase subunit HslU	MTDLTPREIVSELDRFIIGQKEAKRAVAVALRNRWRRHKLSDEMREEVYPKNILMIGPTGVGKTEISRRLAKLAKAPFLKVEATKFTEVGYVGRDVEQIIRDLTDVAMVQTRDQMREEVKARAHKAAEERVISALAGTDAREGTREMFRKKLRDGELDDKEIEVEVADASGGMPLGMMGGQPGMEQQMQGLQDLFKAFGSNRTSKRKMSVAESYEILISDEADKLLDDEKVKEAALEVVQHSGIVFIDEIDKVTARADARGADVSREGVQRDLLPLIEGTTVSTKHGPVKTDHILFIASGAFHVAKPSDLLPELQGRLPIRVELRALTEADFTRILSETDNALTRQYMALMQTEQVTVEFTQDGIEALARIAAEVNQSVENIGARRLYTVIERVFEELA…	K03667	hslU; ATP-dependent HslUV protease ATP-binding subunit HslU		25.4896	25.6037	25.3847	25.6902	25.6449	25.5704	25.6637	25.6876	25.704	25.4817	25.5604	25.5272	25.5176	23	23.5326	25.4926	25.6352	25.6851	25.5231	24.0167	0.0894534	0.0493815	0.0165471	0.0322349	1.08332	0.0532163	0.0644412	0.0678998	0.0589602	0.0598731	0.142517	0.192437	0.0304533	-1.47594		+			0.119823	0.0402753	0.674072	0.12724	0.04992	-0.112063	-1.61846
DMKJLJHC_00680 ATP-dependent protease subunit HslV	MADDKFPGWHGTTIIGIRKGGKVVVAGDGQVSLGQTVIKGSARKVRRLSPGGHDIVAGFAGSTADAFTLLERLEKKLEASPGQLMRGCVELAKDWRMDKYLRNLEAMLIVTDGKDLYVLTGAGDVLEPEHDIAAIGSGGNFALAAARGLMETDLDAEAVARKAMAIASDICVYTNGNLTVETVGG	K01419	hslV; ATP-dependent HslUV protease, peptidase subunit HslV [EC:3.4.25.2]		22.6495	22.5305	22.9085	22.9048	22.9973	22.9823	23.4935	23.8512	23.7499	23.053	23.1439	23.1262	22.3063	22.005	21.9975	22.6962	22.9615	23.6982	23.1077	22.1029	0.157805	0.0405584	0.15053	0.039365	0.143848	0.0076598	0.0100995	0.0171301	0.0110523	0.01589	0.26531	1.00205	0.411543	-0.59324		+	+	+	0.0826828	0.00289339	0.0231985	0.0171165	0.73674	0.146233	-0.85855
DMKJLJHC_00682 Thioredoxin	MATVAVTDATFDQEVRQSDVPVVVDFWAEWCGPCRTIGPSLEELSEELSGKIKVVKINVDENPESPATLGVRGIPALFLFKNGEVVSNKVGAAPKAALQTWIESEI	K03671	trxA; thioredoxin 1		24.121	23.5623	24.1542	23.9005	23.9322	23.6822	24.3596	24.7848	24.2828	24.1261	23.7952	24.0256	24.7823	22.0566	24.921	23.9458	23.8383	24.4757	23.9823	23.92	0.271533	0.111148	0.220798	0.138525	1.3188	0.0182143	0.018546	0.029364	0.0202647	0.0559905	-0.10756	0.529873	0.0364767	-0.02587					0.631505	0.0989577	0.873829	0.979624	0.637433	0.144037	0.08169
DMKJLJHC_00683 ATP-dependent helicase/nuclease subunit A	MSPNDATERQIQASMPKDSVWLSANAGSGKTKVLTDRVARMLLNGTEPQRILCLTYTKAAAAEMQNRLLALLGGWAMMAETELRKKLEALGEEGSISAERLNEARRLFAKAIETPGGLKIQTIHAFCASLLRRFPLEAQVPHGFSEMDDRAGDLMREDILEAIASGEERPVLDALLMAYSAEDLGKICREISQYRDLFLPERSRAEIFGHYGLPETFTRAALLAQVFEPGDLELVRSVAPACLGSGPNDQKVGRVFAGIETLDLTALAQLADVMNLKKGASVPFGPKGDKLLTQGLQKKLEPGVFEALKDLAERVAEAREPRLALAAAERSELLHAFARAYLPRIDRYKAQRGWLDFDDLIQRAAALLSNPSVAQWVLFKLDGGIDHILVDEAQDTSPG…	K16898	addA; ATP-dependent helicase/nuclease subunit A [EC:3.1.-.- 3.6.4.12]		23.3914	23.503	23.546	23.4791	23.2342	23.4331	22.6887	22.9233	22.5389	23.4278	23.3115	23.5503	22.4761	21.3582	21.4268	23.4801	23.3822	22.717	23.4298	21.7537	0.0651714	0.106272	0.158196	0.0975048	0.511586	0.0131893	0.0135191	0.00867713	0.0138174	0.0124741	-0.0979667	-0.76318	-0.0503033	-1.72641		+		+	0.328712	0.00322892	0.576871	0.00907608	-0.665213	0.0476633	-1.62844
DMKJLJHC_00684 hypothetical protein	MSVFAVPIGVDFPEALVAGLVERMADQPPEAMARVQLYLNSGRMLRRVREVFLSEGARYLPRLRLVSDLGQDPLAGLPLAVSGLRRKLELAQLVEQLTRAIPAFEAGSSHIQLAESLSSLIAEMQSEGVHPDDLETIEMSENHAEHWRRSLEFIKIVARYFEGDAGLDAEARQRLVVEEIARSWAHTPPEDPVIVAGSTGSRGATAAFMRAVCGLEDGMVVLPGFDRDMTDLAWNSLFSGKFPIEDHPQYRFRGLLDSLGLTPGDVRDWTGAVPNAAARNKLVSLALRPAPVTDQWRIEGRDLGDLRQVCAGLSLIEARDPRHEALSIALRMREGLETGRSVALITPDRLLARRVTAALDRWGIIPDDSAGQPLQLTAPGRLLRHVADLRGAALTIADL…			K16899	22.4885	22.4795	22.4925	22.2034	22.1097	22.2827	21.6816	20.5186	21.6448	22.1689	21.9711	22.2403	21.9216	21.9601	21.3593	22.4868	22.1986	21.2817	22.1268	21.747	0.00539706	0.0706999	0.539798	0.113874	0.274602	0.00662523	0.00595188	0.00320852	0.00559964	0.0124162	-0.288223	-1.20516	-0.360053	-0.739797	+	+	+	+	0.00453937	0.0342747	0.0111042	0.0189524	-0.91694	-0.07183	-0.451573
DMKJLJHC_00690 SCO1 protein	MKTATIAFAASAVVILGLGATWLSISARQSEDVFAKCRSSVVAGGAGQIGGPFTLTDENGREVTDKDVITEPSLLYFGYTYCPDVCPLDNARNANAIEQLEAKGYSATPIFISVDPARDTPEVLREFTDIMHPKMIGLTGTPEQINKVSKEYRTYYKVQNPGDPYTLIDHSTQSYLVLPKVGFVEYFNRDAKPEQMADRMACFIDAWKSSGSGN	K07152	SCO1_2; protein SCO1/2		22.2782	22.423	22.4623	22.2154	22.4346	21.9973	22.6364	23.0125	23.0262	22.2045	22.1643	22.4181	20.9227	22.453	21.1639	22.3879	22.2158	22.8917	22.2623	21.5132	0.0791698	0.178519	0.180581	0.111369	0.671768	0.006186	0.00602311	0.00979436	0.00615108	0.0105586	-0.172097	0.503843	-0.125587	-0.874633		+			0.280666	0.0224808	0.263516	0.141452	0.67594	0.04651	-0.702537
DMKJLJHC_00691 Photosynthetic apparatus regulatory protein RegA	MADDLTAELGPDRSLLLVDDDISFLTRLARAMEKRGFAPQTAETVAAGRAIVQSQAPAYAVIDLRLEDGSGLDVVELLREKRADARIVVLTGYGAIATAVAAVKMGATDYLAKPADATDITNALLARGEEAPPPPENPMSADRVRWEHIQRVYELCDRNVSETARRLNMHRRTLQRILAKRSPR	K15012	regA; two-component system, response regulator RegA		23.1312	23.3287	23.4486	23.4074	23.4087	23.303	23.7716	24.0586	23.8154	23.1474	23.5333	23.5146	22.4325	22.3338	22.3932	23.3028	23.373	23.8819	23.3984	22.3865	0.13088	0.0495427	0.126246	0.177654	0.0405803	0.0116638	0.0134339	0.0194558	0.0135198	0.0193416	0.07024	0.579067	0.09562	-0.916307		+		+	0.517004	0.0107943	0.573117	0.000697349	0.508827	0.02538	-0.986547
DMKJLJHC_00692 Trans-acting regulatory protein HvrA	MNLETMSLDELKALQKNVEKAIASCEARKKKEALDQLEKAARDMGYSLSELTSAGGVKPRRAVAPKYANPANPSETWSGRGRKPRWVQAALDQGKSLDDLKI	K03746	hns; DNA-binding protein H-NS		23.6842	23.6458	23.676	22.9306	22.8874	22.9519	23.1899	23.3746	22.9766	23.0576	23.0759	23.2342	21.3285	21.1644	21.0061	23.6687	22.9233	23.1804	23.1226	21.1663	0.0165032	0.0268483	0.162659	0.0793223	0.131639	0.0150304	0.00983564	0.0119639	0.0111668	0.00830204	-0.74539	-0.48829	-0.546087	-2.50232	+	+	+	+	4.76471e-06	0.0134379	0.000676425	1.1742e-05	0.2571	0.199303	-1.75693
DMKJLJHC_00695 Adenosylhomocysteinase	MADYIVKDIGLAEFGRKELEIAETEMPGLMACRAEFGQSKPLKGARIVGSLHMTIQTAVLIETLVELGADVRWASCNIYSTQDHAAAAIAAGGTPVFAIKGQSLTEHWDYLDRSFQFPEGANMILDDGGDATLYVLLGARVEAGETDLIEVPTSEEEEVIFKQIKKRMAETPGWFTKTREAIQGVSEETTTGVHRLYDLHKKGQLPFPAINVNDSVTKSKFDNKYGCKESLVDGIRRATDVMMAGKVAVVCGYGDVGKGCAASLLGAGARVKVTEVDPICALQAAMDGFEVVLLEDVVDSADIFITTTGNRDIIRIEHMRAMKNMAIVGNIGHFDNEIQVANLRNHKWTNIKEQVDMIEMPSGNRIILLSEGRLLNLGNATGHPSFVMSASFTNQVLAQ…	K01251	E3.3.1.1; adenosylhomocysteinase [EC:3.3.1.1]		27.2188	27.2711	27.0596	27.0144	26.978	26.9783	27.2228	27.2425	27.06	26.9154	27.1045	26.9459	26.7679	23.5561	26.6319	27.1832	26.9902	27.1751	26.9886	25.652	0.0899601	0.0170698	0.0817546	0.0829025	1.48301	0.171772	0.164846	0.190724	0.162824	0.185991	-0.192973	-0.00810333	-0.1946	-1.53123	+				0.0407209	0.929425	0.0876817	0.218709	0.18487	-0.00162667	-1.33826
DMKJLJHC_00697 hypothetical protein	MGKRDELIAKYADDLKSKCGMTPDMDLLTKVTIACGPAIYNADASTVAGSDKSELETVKDNFLVKKLGLSDSPALMDAIDAVIETYGRSERNKYRAVIYYMLTKHFGKESVYA				25.2865	24.9734	24.8961	25.2367	25.6379	25.3955	25.4647	25.1898	25.3182	25.7179	26.0312	25.666	22.1621	25.0125	22.6276	25.052	25.4234	25.3242	25.805	23.2674	0.168784	0.164997	0.112311	0.161341	1.24851	0.0392099	0.0556428	0.0528734	0.0716861	0.0356179	0.37138	0.272227	0.75306	-1.78459			+		0.090095	0.130395	0.01033	0.11569	-0.0991533	0.38168	-2.15597
DMKJLJHC_00699 hypothetical protein	MARVNSAAVGAFCVSLISAPAAFADVTPEQVWTAWQKGYESYGYKVTTGSKDRSGDTYTISDVTLENTSGESSFTLTVPSIKLHDNGDGTVDATMSEKMNGVATTDMGEDGPVQLDMVLTQQDSKITVSGTPEDMIYDIDSPKMTVEMDQDKAGKTAKPVKVFVSLEGTKGTYEMKQSGGQDITSNVTTKLVRMSASGADPETSGTFNLSGSVADVSYNGSFVLPEGVSMEELDTALNAGAKIDFQATYGASDFSLSADANEGPVSVKTSAQSGALTAVMTQDSVQYGATAEGSKLNMTSQKLPFPVTAGLDEIVTNFLIPVSKSDTAQPFKAKIALKGLTVSDDIWNMFDPDKKLPRDPASLVVDLSGKAMLTADLFSKAAAKMSSPPIEMQSADINA…				26.8849	26.6468	26.8327	26.8316	26.7949	26.7551	26.6808	26.9535	26.9146	26.8664	26.9922	27.0214	26.7265	21.5753	26.319	26.7881	26.7938	26.8496	26.96	24.8736	0.102207	0.031252	0.120411	0.0672131	2.33817	0.130625	0.143868	0.152206	0.159627	0.108438	0.00571	0.06149	0.17185	-1.91455					0.943401	0.611218	0.117888	0.311703	0.05578	0.16614	-1.92026
DMKJLJHC_00700 Metalloprotease PmbA	MTDISLPKLTETLLSAARRAGAKEADAIAVDGRSVAIDVRAGVLEQAERAEGVEIGLRVLIDGRQACVSASDVSERTIAQMAERAVAMAREAPQDRYIGLADPDQLIRDWDAAALELADPAEEPAAAALQEDAQAAEAAALGVAGVEQVQSASAAYNYRRMHLAASNGFSGGYSRSSRSISAVAISGEGLGMERDWAAESRIFQSDLPSAREIGQLAGERAVARSKPRRPKTGAYPVLLDERISGSLIGHLLAAVNGQAITRGASWLRDAMDQPVLPDALSLFEEPHRKRVSGSRPFDAEGLPTARRAIVENGVLRSWTLDLATARKLGLQSTACAGRGTSSPPSPGVGNVSLTQGTLSREALLAEMGTGLLVTSFIGATINPNTGDYSRGASGFWVEN…	K03592	pmbA; PmbA protein		25.4659	25.6482	25.3481	25.7075	25.7145	25.5713	25.684	25.6564	25.6269	25.6173	25.694	25.5684	26.2149	21.4602	25.4485	25.4874	25.6644	25.6558	25.6265	24.3745	0.123464	0.0659255	0.0233074	0.0516906	2.08434	0.0530234	0.0657623	0.066535	0.0633434	0.0767268	0.177033	0.168383	0.139147	-1.11288					0.14816	0.130952	0.215456	0.492933	-0.00865	-0.0378867	-1.28991
DMKJLJHC_00709 hypothetical protein	MTLLRLIPFPLCLLALAACSDPEKIARYPITPPAVSKDMANRLGTAELRQISLPDYASSQEISFQTPDGALRSNPNNLWADDPARSMTLALARQISEMSGATVLSDPWPLSDPPRRRIDVRVEQLLPGADQMLHVSGLYVVSPTGFDAGGDTVRRFNFTVPIAGAEADGGAQPAAIVAAQGKAVTELARRIAGLR	K09857	uncharacterized protein		22.8855	22.817	22.7021	22.5677	22.5002	22.3187	22.4831	22.8143	22.5456	22.4539	22.2797	22.4788	20.9201	21.5173	21.6987	22.8016	22.4622	22.6143	22.4042	21.3787	0.0756693	0.105172	0.143643	0.0885607	0.332626	0.00824042	0.00714502	0.00808134	0.00678683	0.00961857	-0.339377	-0.187223	-0.397397	-1.42287	+		+	+	0.0207565	0.17826	0.00849412	0.00413178	0.152153	-0.05802	-1.0835
DMKJLJHC_00710 Paraquat-inducible protein B	MTETPDPGPAKLKTSAAKRPIWSRLSIIWIVPLLALVVTLGVAWKSFADRGELIHIDFKDATGVEVGTPLKFRDVQVGKVESVGFTSDLTQVRLGVRVDNDVAPYVDSDAKFWLVRPEVSARGIENLGTVLSGTYLEGFWTNKPSGARTQFTGLERPPLSPDPSKGTIIELRAQDAGGIVDGAPILYHGITVGHLQNLRLNKDGSGVIVDAFIEAPHNKLLTTQTRFWNTSGFSVKFDTSGLSLDVRSLATLVQGGVEFDTFTSGGDVVKNQDTFRLYDSQDVAKNSVFESDQVDPPRYTLLFDDPVQGLEVGSKVQVRGVEAGEVTALAIKVSTDSTGQSYAQQQVTIALSPDRLGLARDSDEKQTTQFIESQVVNGLRARIASVGLLGGTKIIELTD…	K06192	pqiB; paraquat-inducible protein B		25.3573	25.305	25.4457	25.5318	25.3607	25.393	25.5166	25.4896	25.5807	25.4387	25.4549	25.5364	22.0866	21.683	21.7749	25.3693	25.4285	25.529	25.4767	21.8482	0.0580482	0.0742282	0.0382359	0.0427326	0.172741	0.0488571	0.055841	0.0609359	0.0570931	0.013318	0.0591567	0.159623	0.10733	-3.52117		+		+	0.424798	0.031446	0.102978	1.06657e-05	0.100467	0.0481733	-3.58032
DMKJLJHC_00719 dTDP-glucose 4,6-dehydratase 2	MKILVTGGAGFIGSAVVRLAITRGHAIVNLDALTYAACLDNVASVADHPDYHFEQADIRDRVALDAVFARHQPDAVMHLAAESHVDRSIDGPGTFIETNITGTYNMLEAARAYWEIRSRPDTFRFHHISTDEVFGSLPNDPAQRFTETTPYDPRSPYSASKASSDHLVRAWHETYGLPVVLTNCSNNYGPFHFPEKLIPVIILNALAGKPLPIYGDGSNIRDWLYVEDHADALLRVLEAGAPGRSYAIGGENEHSNLELVQMLCAILDQKRPKADGSYTEQIQFVTDRPGHDARYAIDPTRIRAELGWRPSVTLAEGLEKTVQWYLDNESWWRALQNRAGVGKRLGVGG	K01710	E4.2.1.46; dTDP-glucose 4,6-dehydratase [EC:4.2.1.46]		21.5093	21.3321	21.562	21.7723	21.2982	21.5514	21.5127	21.6728	21.5743	21.5721	21.5848	21.5721	21.3892	21.4619	21.6309	21.4678	21.5406	21.5866	21.5763	21.494	0.0983386	0.193728	0.0659429	0.00600337	0.101248	0.00326926	0.0037721	0.00396372	0.00382349	0.0104187	0.0728067	0.11879	0.10851	0.0261667					0.660263	0.228941	0.194326	0.80613	0.0459833	0.0357033	-0.04664
DMKJLJHC_00720 dTDP-4-dehydrorhamnose reductase	MILVFGKTGQVATQLQRQAAVTAFGRDAADLSDPAGCAAAIRAHAPRCVINAAAYTAVDRAEEDEDLATVINGAAPTAMAQACAALDIPFLHISTDYVFDGSGSQPWAPEDTTRPLNAYGRSKRAGETGIMAAGGRHAILRTSWVVSAHGQNFVKTMLRLSETRDALSIVDDQIGGPTPAAEIAATLLRMAEAMCAGHAGGVYHYGGAPWVSWKDFAAEIFARAGRDAALTGIPSVEYPTPATRPLNSRLDGTALQEAFGIAPPDWRTGLDDILSELEVLA	K00067	rfbD; dTDP-4-dehydrorhamnose reductase [EC:1.1.1.133]		20.2734	20.2322	19.9382	20.54	20.4142	20.4738	20.5139	20.5233	20.3336	20.5688	19.1368	21.1883	22.7718	21.8928	21.3814	20.148	20.476	20.457	20.298	22.0153	0.149274	0.0513775	0.0872942	0.859161	0.574232	0.00130958	0.00180344	0.00181155	0.00157629	0.014954	0.328047	0.309023	0.150007	1.86737	+			+	0.0424441	0.0648541	0.819761	0.0112379	-0.0190233	-0.17804	1.53933
DMKJLJHC_00721 Glucose-1-phosphate thymidylyltransferase 1	MTRRKGIILAGGTGTRLFPITIGISKQLLPIYDKPMIYYPLSTLMLAGIREIAVITTPQDQEQFQRTLGDGSQWGISLTYIVQPAPEGLAQAYLLAEDFLDGAPSAMVLGDNIFFGHGLPELLHLADRNTAGGTVFGYHVADPERYGVVDFDANGQARAIIEKPEIPPSSYAVTGLYFLDETASERARSVTPSERGELEITTLLEMYLADGALAVERMGRGYAWLDTGTHASLLDAGNFVRTLSQRQGLQSGSPDEIAFASGWISADALAEHAEQFGKNSYGAYLRRLLDENQP	K00973	E2.7.7.24; glucose-1-phosphate thymidylyltransferase [EC:2.7.7.24]		22.8026	22.5872	22.6518	22.7047	23.009	22.7484	22.8558	22.3716	22.9816	23.1817	23.0909	22.9714	20.9424	21.5555	21.6608	22.6805	22.8207	22.7363	23.0813	21.3863	0.0902334	0.134319	0.262988	0.08612	0.31678	0.00757732	0.00916069	0.00879433	0.0108521	0.00966924	0.14017	0.0557867	0.400803	-1.29426			+	+	0.28776	0.79068	0.0104635	0.0051334	-0.0843833	0.260633	-1.43443
DMKJLJHC_00724 hypothetical protein	MTSDNNNDASPKQGTTPPAQTKSAQVGEQNQDPKGIKKNPGPKFVETRSLARPARMRKRHWGVLISFCAIVLFPLFVVSVYLWGVADDRYASTVGFTVRTADEKAPSSLLGGLASFTGGSSSPDSAVLYQFIRSQALAAEVDKKLHLRDYYSSYWSSDPVFALQPNATIEDLTDYWGRIVRVTYNSSTGLIQVEVTAFTPDMAQKIAKEIVAESQTMVNGLNDSAREDAIRYANSDLKVAEDRLRTAREKLTEFRTRTQIIDLQSDIEGRMGVTNSLQQELAQDMVSLDELSASTSADDPRVAQAKRRIDAIRQRIANERQSLATTIVPGTGKDYPALMSEFEGLTVDLKFAEQVHLSALSARDLAYDNAQRQTRYLATFIKPTLADSAEYPQRSLLFG…	K10107	ABC-2.CPSE.P1; capsular polysaccharide transport system permease protein		23.7465	23.7098	23.6982	23.6179	23.6221	23.5539	23.5139	23.4743	23.2667	23.2395	23.7771	23.62	22.7535	22.0144	20.9374	23.7182	23.598	23.4183	23.5455	21.9018	0.0206162	0.0311916	0.108402	0.225667	0.74569	0.015555	0.0157001	0.0141091	0.014971	0.0138219	-0.120203	-0.299853	-0.172633	-1.8164	+	+		+	0.0104446	0.0184124	0.341954	0.0262093	-0.17965	-0.05243	-1.6962
DMKJLJHC_00727 UDP-galactopyranose mutase	MNILLVGAGLSGAVIGRKLAEAGHTITIVDSRAHVGGNCHTKRDAETGVMVHVYGPHIFHTDDEEVWDYVNSFETFQPYKNRVKTTSRDQVFSLPINLHTINQFYNRTMRPDEARAFIEQQADTSITDPQNFEEQAMRFVGADLYEAFFKGYTIKQWGVSPTELPAAILKRLPVRFNYDDNYFFHRFQGMPENGYTQMIERILDHPGITVQLETRFTREMGEPYDHVFYSGPLDGYFDYERGRLGYRTLDFERFTYEGDYQGCAVMNYGEESVPYTRITEHKHFSPWESHEGSVCYREFSRACEPDDIPYYPIRQVKEKALLADYVAMAETALDVTFVGRLGTYRYLDMDVTIREALDTSRTFLESVETGATMPAFCVAPL	K01854	glf; UDP-galactopyranose mutase [EC:5.4.99.9]		26.7159	26.6575	26.6141	26.2697	26.2573	26.2501	26.1975	26.3892	26.5132	26.3499	26.1728	26.3819	24.431	21.7147	22.5762	26.6625	26.259	26.3666	26.3016	22.9073	0.0417134	0.00812445	0.129885	0.09199	1.13337	0.119732	0.0993046	0.108902	0.101134	0.0277508	-0.403473	-0.295883	-0.360957	-3.75519	+	+	+	+	0.000177985	0.0373897	0.00721149	0.00942992	0.10759	0.0425167	-3.35171
DMKJLJHC_00731 UDP-glucose 6-dehydrogenase	MRIVVIGTGYVGLVSGVCFSDFGHDVVCVDKDARKIDMLRSGKVPIFEPGLDRLMIRNVEAGRLTFTLDLDEAMEGAEAVFIAVGTPTRRGDGHADLTYVMAAAEEVAQKAKDYIVIVTKSTVPVGTNRKVREVVAAANPALDFDVASNPEFLREGAAIDDFMKPDRVVVGVETDRAAKVMAEIYRPLYLREFPIVTTDLESAEMIKYAANAFLATKITFINEIAALCEKVGADVKEVSKGMGLDNRIGKNFLHAGPGFGGSCFPKDTKALARIGQENASPMRITEAVISINEQVKRRMVDKLLDLCDGTFNGKVIAIMGVTFKPNTDDMRDAPSLTVVPALLGGGATVRVVDPQGRHEGEQLLPRVDWIEDPYAASQEADLIVILTEWNEFRALDLGR…	K00012	UGDH; UDPglucose 6-dehydrogenase [EC:1.1.1.22]		24.9565	24.4981	24.5485	24.9464	25.1876	25.0132	24.828	25.1873	25.0546	25.0116	25.1707	25.0894	23.1538	22.4451	22.9386	24.6677	25.049	25.0233	25.0906	22.8458	0.205255	0.101698	0.148329	0.0649617	0.296658	0.0300409	0.0429265	0.0429193	0.0436881	0.0265929	0.381343	0.3556	0.422897	-1.82186			+	+	0.0781448	0.118011	0.0499223	0.00203279	-0.0257433	0.0415533	-2.20321
DMKJLJHC_00733 Lipopolysaccharide assembly protein B	MIWTVIKIAVFLVIVSAVTLEFSHLADMSGGLRLSSMGMEFTLGPLQAVIAVILLFLAVWLVIKVVGLFVAFLRFLAGDETAISRYFDRNRERKGYEALAEGMMASASGEGRLAMSKAAKAQRYLQRPELTNLLTAQAAEQMGDTKKASEVYKRLLADDRTRFVGVRGLMRQKLAEGDTDTALQLAKKAYALKPRHREVQDTLLKLQTERGDWKGARSVLQSKMRQGELPRDVHKRRDAVMALQEAKGVMAEGASIEAREAAITAAKASPDLIPAVVMAARSYIDKDKPRAAERLLRKAWSSQPHPDLAAVYAEVAPDEDPAKRLKRFGKLLELRPDHEESRLLRAELNIAAEDFPAARRALGDLVETHPTARVLAIMAAVERGEGADDAVVRGWLARA…	K02498	hemY; HemY protein		26.2243	26.4252	26.1656	26.5403	26.3885	26.4504	26.7728	26.7576	26.7876	26.445	26.654	26.4891	25.7898	21.9514	25.4203	26.2717	26.4597	26.7727	26.5294	24.3871	0.111168	0.0623106	0.0122274	0.089977	1.72894	0.091321	0.114124	0.144298	0.118433	0.0774009	0.187987	0.500933	0.257637	-1.88457		+			0.105293	0.00317988	0.0634663	0.198791	0.312947	0.06965	-2.07256
DMKJLJHC_00734 hypothetical protein	MTKPRTRKPKSEAQATDGVEGVETQNADISTETQGADVPTGVDETETVPSKQPVSENVTSSDEAALEGAAAESTSETETSEEAAPEADPMEVQTVPKLETSGEEAGEEPSSEQAYPHDRPSETAQSAPLPPEARVIEVRRAGTLPLIFGGILAAVIGAGAVIVAIPNLPPSLSGWLPAAKTPQISDEMDSKFAAQAKKIDALSSDLAALKSQAAPAPDMSGVQTSLDQIGSEVRANKSALEALQSQVKGIGASGGAADAETQAKFEAAAKAAQERIAQAEQQAQKLRDQSEAAAKAAMAQAAAARMKAALDAGVPLAPARADLQAAGIAVPEALSGDVPTQQALQQSFPDAARKALAAARKADSGSSFASKLGAFLLTETGARSLTARQGDSADAVLSR…				26.5426	26.5679	26.636	26.0644	26.3008	26.2812	26.8566	26.8978	26.883	26.3533	26.2126	26.1473	25.7774	21.0917	24.8943	26.5822	26.2155	26.8791	26.2378	23.9211	0.0394641	0.107136	0.0170332	0.0859295	2.03294	0.113246	0.0963497	0.155351	0.0967591	0.0560351	-0.366703	0.296973	-0.344407	-2.66103	+	+	+		0.0104797	0.000614721	0.0067401	0.137863	0.663677	0.0222967	-2.29433
DMKJLJHC_00738 hypothetical protein	MYFAVICRDKPGALQIRKDNREAHLAYIAETGVVFMAGPFIEDGEMRGSLVILEVADLAAAQDWAANDPYAKAGLFAESSVQEWKKVIG	K09780	uncharacterized protein		23.5694	23.4131	23.6827	21.2427	21.4697	21.4873	21.2069	20.5347	20.062	21.4503	20.4736	21.5342	20.5184	21.7485	22.3738	23.5551	21.3999	20.6012	21.1527	21.5469	0.110521	0.111369	0.469739	0.481389	0.770763	0.0138925	0.00342153	0.00200201	0.00285057	0.0108081	-2.15519	-2.95389	-2.4024	-2.00818	+	+	+	+	4.14012e-05	0.000979627	0.00234029	0.0218226	-0.798693	-0.24721	0.147017
DMKJLJHC_00739 hypothetical protein	MRYWLFKSEPNKWSWDMQVAKGEQGEEWDGIRNYLARNNMREMEIGDRGFFYHSNIGKEVVGIVEVCALSHPDSTTDDPRWDCVDIKAVKPLKRPVTLAEVKADPRLSEMSLVTSMRLSVQPVTPEEWRIVCALGDVDPD				22.2949	22.7931	22.6751	21.528	21.8109	21.5696	21.4367	21.3799	21.7744	21.8489	21.414	21.5604	21.998	21.945	22.1291	22.5877	21.6362	21.5304	21.6078	22.024	0.212602	0.124699	0.174135	0.180671	0.0773755	0.00710508	0.0040304	0.00381217	0.00390778	0.0150446	-0.951527	-1.05734	-0.97992	-0.563653	+	+	+	+	0.00547147	0.00553875	0.00766744	0.0243774	-0.105813	-0.0283933	0.387873
DMKJLJHC_00740 Phosphate-binding protein PstS	MKTVTFTASALAIIAVSGTAAFARDNVQVAGSSTVLPYASIVAEAFGENFDFPTPVVESGGSSAGLKRFCEGVGTNTIDIANASRKIRDKEIKTCADNGVKDIMEVRIGYDGIVFASQKDGPAFTAFEPADLYNALGAKVLKDGALVDNPYTKWNEFNADLPDADINAFIPGTKHGTREVFEEKVLLKGCEDTGAMKAMVDAGMSEKDAEAGCMKVRTDGKSVDIDGDYTETLARLGSNPNGVGVFGLAFYENNTDTLKVATMSGVAPSTETIASGDYPVSRPLYFYVKKAHIGEIPGLKEYAEFFVSDDIAGPDGPLAQYGLVSDPELAKTQQAVADEVTMGSGM	K02040	pstS; phosphate transport system substrate-binding protein		25.6428	25.5791	25.8097	26.859	27.0509	26.8476	26.673	27.1887	26.9374	26.8171	26.5296	26.5597	26.361	22.5908	22.5664	25.6772	26.9192	26.933	26.6355	23.8394	0.0972518	0.093285	0.210532	0.129023	1.78307	0.0604791	0.156923	0.161266	0.127475	0.0529483	1.24195	1.25583	0.958293	-1.83783	+	+	+		0.00020001	0.00156248	0.00110526	0.219237	0.01388	-0.283657	-3.07978
DMKJLJHC_00742 Phosphate transport system permease protein PstA	MSDATHPAAHRSPARSLHQLDARTKRRNASERRFKMMGIVAIGIGLAFLVLLLSTIVINGSSAFQQTFIKVPVYLDPAKLDKNGNRDPKDLKKATTFTYAPLVQKGLLEVVQKAGFGSDLSKSDMKNLISASAASQVRDRVLADPSLIGKTVDFEIFASSRVDGYLKGRVHRDEIALDKNISVAQLDLVDSLRKDGALHKGFNWTFIFGADASDSRAEQAGIGIAMLGSFYMMLVVLVLALPIGVAASIYLEEFAKKNRFTDLIEVNISNLAAVPSIVFGILGLAAFIQFAHLPQSAPLVGGLVLTLMTLPTIIISTRAALKAVPPSIRDAALGVGASKMQSVFHHVLPLAMPGILTGTIIGLAQALGETAPLLLIGMVGYVATNTPEGFWDGFVSPNS…	K02038	pstA; phosphate transport system permease protein		19.6343	18.3975	20.2617	19.5402	19.8634	19.5288	18.8499	19.4656	19.0109	19.6191	19.7308	19.4201	22.4988	21.9297	22.3349	19.4312	19.6442	19.1088	19.59	22.2545	0.774486	0.155096	0.260732	0.128527	0.239166	0.000796816	0.0010132	0.000711557	0.000964992	0.0176502	0.212997	-0.322367	0.158853	2.82332				+	0.722327	0.606675	0.788969	0.00789619	-0.535363	-0.0541433	2.61032
DMKJLJHC_00743 Phosphate import ATP-binding protein PstB	MNDMTLTERAVNATDCKITARNVQVYYGETHAIKDVDVDILDKTVTAFIGPSGCGKSTFLRCLNRMNDTIDICRVKGEILLDGEDIYDKRVDPVQLRAKVGMVFQKPNPFPKSIYDNVAYGPKIHGLTRNRAELDEIVEASLRKAALWGEVKDRLQAPGTGLSGGQQQRLCIARAIATSPEVLLMDEPCSALDPIATAQVEELIDELRTNFSVVIVTHSMQQAARVSQKTAFFHLGNLVEYDETDQIFTNPTDPRTESYITGRIG	K02036	pstB; phosphate transport system ATP-binding protein [EC:7.3.2.1]		21.7854	21.9229	22.0894	21.7807	22.1676	19.1931	22.0146	22.2286	22.0625	21.8462	21.8657	21.7207	22.3396	21.0011	20.3194	21.9325	21.0471	22.1019	21.8109	21.22	0.12428	1.32048	0.0917023	0.0642412	0.839137	0.00451176	0.00267929	0.00566543	0.00449847	0.00861674	-0.88544	0.169393	-0.121673	-0.712527					0.398565	0.195834	0.286108	0.300595	1.05483	0.763767	0.172913
DMKJLJHC_00744 Phosphate-specific transport system accessory protein PhoU	MSDHILSAFDRDLEAVQALVVKMGGLVEEQILNCAKALETRDDELAQEVRNRDKAVDALEEKINEEAARLIALRAPAARDLRMALSVIKISASLERVGDYAKNIGKRSQVLMDSPAINGTPAAIRRMAQATEAMLKDALDSYIQRDADLARDVRARDLEVDQMYNALFREFLTYMLEDPRNITPCMHLHFIAKNIERMGDHATSIAEQVIYLVTGEMPDDARPKSSSVIETEV	K02039	phoU; phosphate transport system protein		23.1151	22.7735	22.7769	22.9217	22.5429	22.6603	20.7601	22.8217	22.4905	23.0654	22.8767	22.6976	22.0161	21.7011	22.0552	22.8885	22.7083	22.0241	22.8799	21.9241	0.16026	0.15834	0.903951	0.150167	0.158491	0.00875235	0.00847398	0.00536783	0.00943785	0.0140378	-0.18023	-0.864433	-0.00863	-0.964407				+	0.321133	0.2538	0.958348	0.0037637	-0.684203	0.1716	-0.784177
DMKJLJHC_00746 NADP-dependent malic enzyme	MPTKNRITPEEALAYHLEPRPGKYDIVASTAMTSQRDLSLAYSPGVAVPVEAIAKNPELAYDYTVKGNMVAVISNGSAILGLGNLGALASKPVMEGKAVLFKRFADVNAIDIELDTEDPEQIINAVKLMGPTFGGINLEDIKAPECFIIEQRLKEMMDIPVFHDDQHGTAVICAAGLINALELSGKKISDCRIVLNGAGAAGIACLELVKAMGAKHDNCIMCDTKGVIYQGRTEGMNQWKSAHAAVTEARTLEDAMMGADVFLGVSAKGAVTEEMVKSMADNPVIFAMANPDPEITPEEAHAVRPDAIVATGRSDYPNQVNNVLGFPYLFRGALDIHARAINDEMKIACARALAELAREDVPDEVAMAYGRKLTFGRDYIIPTPFDPRLIHVIPPAVAK…	K00029	E1.1.1.40; malate dehydrogenase (oxaloacetate-decarboxylating)(NADP+) [EC:1.1.1.40]		26.9439	26.4791	26.8909	27.2365	26.8754	27.1551	26.8436	26.6632	26.8045	27.2027	27.3596	27.3327	23.2392	22.9045	21.9891	26.7713	27.089	26.7704	27.2983	22.7109	0.207753	0.154676	0.0775151	0.0685245	0.528373	0.129109	0.176528	0.144076	0.201815	0.024219	0.317713	-0.000853333	0.52703	-4.06035			+	+	0.157805	0.995918	0.0271009	0.000537867	-0.318567	0.209317	-4.37807
DMKJLJHC_00747 DNA mismatch repair protein MutS	MTKPTVTPMMEQYLGIKEANPGALLFYRMGDFYEMFFEDAVDAAAALDIALTKRGKHLDQDIPMCGVPVHAAEGYLLTLIRKGFRVAIAEQMEDPAEAKKRGSKSVVKRDVVRLVTPGTLTEESLLEARRHNFLAAWADVRDSGALAWVDISTGEFRVMACPLTRLGPELARLAPREVLASDAKADDCAEIVSDMRAALTPIARASFDSQSAEKRLCALYSVSSLDAFGTFSRAEIAAMGAIVDYLDITQKGKLPLLRPPIHEESGASVQIDAATRRNLELTQALSGGREGSLLSAIDRTVTAGGARLLERRISAPSRNLPQIHMRHDCVRFMLEQGRLREDLRASLKRCPDMDRALSRLALDRGGPRDMAAIRNGLAQAGQIADQLANIDAPALLKSA…	K03555	mutS; DNA mismatch repair protein MutS		23.7717	23.4423	23.6635	23.4434	23.1297	23.2542	22.8873	23.0157	23.1389	23.4118	23.3206	23.4939	20.5068	21.9288	21.6531	23.6258	23.2758	23.014	23.4088	21.3629	0.13711	0.128984	0.10269	0.0707745	0.615734	0.0145909	0.0125579	0.0106605	0.013617	0.00951367	-0.350063	-0.611887	-0.217077	-2.26297		+		+	0.0581919	0.00722324	0.117504	0.00711388	-0.261823	0.132987	-1.91291
DMKJLJHC_00748 Protein GrpE	MSEKKDEIAEDQAEMNEAFEDIMAEEVDELEALRAERDDMRDRFMRALADAENARKRADKERQEASNYGGTRLARDMLPVFDALQRALDAVTEEQRAQNGALIDGIELTQRELINVFSRHGITTLAPEVGERFDPQLHEAMFEAPVQGTKAGDIIQIMEHGFMIHDRLLRPAKVGVSSMPKS	K03687	GRPE; molecular chaperone GrpE		20.8524	21.1826	19.2974	20.0974	20.2695	19.5988	20.0891	20.2168	21.0521	20.8805	19.9739	20.1702	21.9202	21.5658	20.9577	20.4441	19.9885	20.4527	20.3415	21.4812	0.821997	0.284422	0.427027	0.38944	0.397488	0.00160801	0.00128636	0.00180614	0.00162463	0.0103271	-0.455577	0.00853667	-0.102583	1.03711					0.499991	0.990225	0.881008	0.18347	0.464113	0.352993	1.49269
DMKJLJHC_00749 Heat-inducible transcription repressor HrcA	MADKTEILSEMNDRSREVFRRVVEGYLNSGDPIGSRTLTRQMSEKLSAATIRNVMQDLEYLGLLDSPHASAGRIPTQMGLRMFVDGVMEISHIGNEDRAALDATMGANSGNVGSILDRVSSALSGMTHGASLVLAPKQEAPIRHIEFVSLAPDRALVVLVFADGQVENRVFTPPIGQTPSSMREAANFLNAMAEGRTLSELGAHIQHQIANRRQEIDTLAAALIDSGLAAWEDKGERTERLIVRGRANLLDSEDDLDRIRSLFDDLERKRDIAEFLNLAEDGEGVRIFIGSENKLFSLSGSSLVVSPYMNADRKIIGAVGVIGPTRLNYGRIVPIVDYTAQLVGRMISGQSKG	K03705	hrcA; heat-inducible transcriptional repressor		21.5218	20.543	19.838	21.8155	20.2585	20.2798	21.5889	21.8967	21.4788	19.4479	21.4398	21.1364	22.5742	21.4011	21.6483	20.6343	20.7846	21.6548	20.6747	21.8745	0.690415	0.728983	0.176855	0.876293	0.504935	0.00183458	0.00223357	0.00415561	0.00204667	0.0135634	0.150303	1.02051	0.0404167	1.24022					0.842685	0.112855	0.961595	0.109624	0.87021	-0.109887	1.08992
DMKJLJHC_00750 Ribonuclease PH	MRPSGRDLSDLRTISIETGVTKHAEGSCLIKMGDTHVLCTATIEDRAPSFLKGSGLGWVTAEYGMLPRATNTRNRREAASGKQGGRTVEIQRLIGRALRAGVDRSALGERQIVVDCDVLQADGGTRCASITGGWVALRLACNKLMKSGACLSDPLPDHVAAISCGIYAGQPVADLDYAEDSEAGTDGNFIMTGRGKIIEVQMSAEGATFSREQMNKLMDLAEAGVAQLVEAQKAAIA	K00989	rph; ribonuclease PH [EC:2.7.7.56]		23.6846	23.5145	23.0717	22.9108	23.1282	23.4643	23.4512	23.5579	23.3026	23.0965	23.2467	22.9948	21.579	21.3042	22.1986	23.4236	23.1678	23.4372	23.1127	21.6939	0.258361	0.227682	0.104703	0.103466	0.374076	0.0126824	0.011652	0.0142955	0.0110904	0.0119676	-0.255847	0.01363	-0.310933	-1.72968				+	0.352689	0.948192	0.189258	0.00576648	0.269477	-0.0550867	-1.47383
DMKJLJHC_00754 Chromosome-partitioning protein ParB	MAEKRNERRGLGRGLSALMADVDLTPASEEEAPRRAEQFIPIERLEPNPDQPRRDFEPGALEELSASIREKGVIQPLIVRAHPKKPDHFEIVAGERRWRAAQMAQLHELPVIVRVFDDTEVLEVAIIENIQRAELNPLEEAQAYRQLMERFGHTQEKLAEALSKSRSHIANLMRLLQLPDEVREYLREGKLSAGHARAMITASDPVALARQAVAKSLSVRDVERLAKKPSEKTERAPRPKPQKDADTRALEGDLSATIGMKVAIDHSDQGSGKVSIAYSDLDELDRLCQLLSGGR	K03497	parB; chromosome partitioning protein, ParB family		24.0486	24.1166	23.7059	23.9931	24.3047	24.438	24.3059	24.3477	24.2763	24.2853	24.2244	24.1946	22.7408	20.8911	23.046	23.957	24.2453	24.31	24.2348	22.226	0.179756	0.186439	0.0292914	0.0377494	0.952091	0.0183562	0.0245902	0.0261773	0.0241399	0.0173047	0.28822	0.35295	0.277737	-1.73108					0.19063	0.0518707	0.0992637	0.0648941	0.06473	-0.0104833	-2.0193
DMKJLJHC_00755 Chromosome partitioning protein ParA	MSDPIRANEARIITIANQKGGVGKTTTAINLAAALAETGEKVLLIDLDPQGNASTGLGIEADDRDVSTYELLLEDAPIGSVVRATEVENLFLCPATTDLSSADMELVSTEKRSFLLHDALRHTDIDSFEFTYILIDCPPSLSLLTVNAMVAAHSVLVPLQAEFFALEGLSQLMLTIREIRQSANRSLRIEGIVLTMYDVRNNLSQQVEADARNTLGELVFRTMIPRNVRISEAPSYAQPVLSYDGSSRGAVAYRALAQELVARHKAAKKGV	K03496	parA; chromosome partitioning protein		23.3881	23.5753	23.5278	23.7926	23.8406	23.8394	23.5207	24.335	23.7328	24.006	23.43	23.5957	21.7445	22.4503	21.9699	23.4971	23.8242	23.8629	23.6772	22.0549	0.0794512	0.022333	0.344923	0.242127	0.294371	0.013345	0.0183659	0.0192012	0.0164019	0.0153696	0.327137	0.365797	0.180147	-1.44219	+			+	0.00497376	0.217676	0.374007	0.00259758	0.03866	-0.14699	-1.76933
DMKJLJHC_00758 tRNA modification GTPase MnmE	MDTIYALATARGKAGVAVIRVSGPQAWEAARALAGELPRPRVAALRRLHLGAEALDEAVVLIFEEGASFTGDAVAELHVHGSVATVSAVLSALAQQPGLRLAEPGEFTRRALENERLDLSQVEGLSDLIEAETEAQRKQALKVLSGAVGAYVESWRADLVRAAALIEATIDFADEDVPVDVSPEVTELIDRVSYGLRDELRRIDAAERVRDGFEVAIVGSPNAGKSTLLNALAGREAAITSEIAGTTRDVIELRMDIAGLAVTLLDTAGLRETDDVVEAIGVKRALQRAGESDLRIFLLDGGDVPLIDPLPDDIIVHGKADLFEGNDFAVSGKTGQGLDRLISELASRLSQRAEGAGVMTRERHRVAIRQAFEALESARNEVLRGSDRSELAAESLRQA…	K03650	mnmE; tRNA modification GTPase [EC:3.6.-.-]		22.0406	22.1769	22.1003	21.886	22.0191	22.0175	22.5977	21.2427	21.9273	20.0734	22.322	21.6916	23.2443	21.8461	21.7354	22.1059	21.9742	21.9226	21.3623	22.2753	0.0557817	0.0623914	0.553215	0.947068	0.686714	0.00508794	0.00509461	0.00500305	0.00329644	0.0179063	-0.131707	-0.183373	-0.74359	0.169337					0.0900532	0.665196	0.329826	0.745671	-0.0516667	-0.611883	0.301043
DMKJLJHC_00759 Transcription termination factor Rho	MSETRLNLADLKIRSPKELLALAEEWEIENASTMRKGEMMFSILKEHAEDDWVIGGDGVLEVLQDGFGFLRSPEANYLPGPDDIYVSPDMIRQHSLRTGDTVEGVIRAPGESERYFALTKAERINFEEPERARHKVAFDNLTPLYPDERLKMEIEDPTIRDRSARIIDLVSPIGKGQRSLIVAPPRTGKTVLLQNIANSIEKNHPECYLIVLLIDERPEEVTDMQRSVKGEVISSTFDEPATRHVAVSEMVIEKAKRLVEHKRDVVILLDSITRLGRAFNTVVPSSGKVLTGGVDANALQRPKRFFGAARNIEEGGSLTIIATALIDTGSRMDEVIFEEFKGTGNSEIVLDRKVADKRVFPAMDILKSGTRKEELLVDQKDLQKTFLLRRILNPMGTTD…	K03628	rho; transcription termination factor Rho		26.8884	26.799	27.0024	26.3983	26.1636	26.0963	25.9637	25.9955	25.9848	26.3451	26.1476	26.3837	26.1556	22.8192	26.0039	26.8966	26.2194	25.9813	26.2921	24.9929	0.0832461	0.129442	0.0131859	0.103407	1.53832	0.140824	0.0966132	0.0833778	0.100474	0.117786	-0.677203	-0.915263	-0.604487	-1.9037	+	+	+		0.00339522	0.000104884	0.00299171	0.155458	-0.23806	0.0727167	-1.2265
DMKJLJHC_00760 hypothetical protein;DMKJLJHC_05990 hypothetical protein	MTDFLSNWYPWIKAFHVIAIITWMAGIFYLPRLFVYHVEGLKKQGVPRGSDMDLLFQHQERLLLRAIMNPSMIAAWVFGLMLVATPGIVDWSSIWPWTKALAVLGMTWFHMWCAKERKALAAGTSTKTGRQYRMMNEVPTVLMLVIVISVFVKF	K08973	putative membrane protein		21.2076	21.3417	20.7429	20.1574	20.0506	20.7178	21.0974	19.9583	20.7168	20.2591	20.2433	18.856	23.206	22.818	20.5828	21.0974	20.3086	20.5908	19.7861	22.2022	0.256583	0.292597	0.473502	0.657714	1.15606	0.00252895	0.00160585	0.00198771	0.00110551	0.0170226	-0.788803	-0.506537	-1.31124	1.10486	+				0.045629	0.254244	0.0583918	0.257467	0.282267	-0.52244	1.89367
DMKJLJHC_00762 Shikimate dehydrogenase (NADP(+))	MSDHPRIPVAGVIGSPIAHSRSPALFRHWLNSYGIAGHYVPLDVNQADLETVLRTLPRMGFVGVNITIPHKERALEIADVVSDRAALIGAANTLILRADGKIHADNTDGYGFIANLNQHAPNWVAGAGPAAVLGAGGAARAIVASLLETGAPEIRISNRTRARAEALRTEFGARVVVYDWVQAGNMIEGANTVVNTTSLGMTGKADFRVPLDALSPGTTCCDLVYSPLRTRFLVDAEEAGCVVVDGLGMLLHQAVPGFERWFGQRPEVTDALRDAVLSA	K00014	aroE; shikimate dehydrogenase [EC:1.1.1.25]		22.2397	22.5015	22.3358	22.5255	22.1234	22.6063	22.283	22.1885	22.4244	22.2692	22.3724	22.5397	21.9331	21.7124	21.7379	22.359	22.4184	22.2986	22.3938	21.7945	0.108143	0.211211	0.096896	0.111429	0.0985676	0.00606349	0.00693149	0.00649306	0.0067381	0.0128315	0.05942	-0.06035	0.0347767	-0.56451				+	0.741114	0.588257	0.767288	0.00548472	-0.11977	-0.0246433	-0.62393
DMKJLJHC_00765 Quinolinate synthase A	MLDLTKMRSTLAGQYDLAPSMRLAEDMADTHAKMARVMPLADFARYAPYIRAINALKREKNAVILAHNYMTPDIYHGVADVVGDSLQLAIEATKVEAEIIVQGGVHFMAETSKILNPAKTVLIPDMQAGCSLAESITADGIAEMRAKYPGAPVVSYVNTTAEVKAASDICCTSSNAAQIVGALDSDVVIMTPDQYLAQNVAREVPQKKVVWWEGSCIVHEQYTKDDINAFREMNPDTRIIAHPECPPDVVDASDFSGSTSGIIDYVTREKPSKAMLVTECSMASNISDALPEVEFTGPCNMCPYMKKITLEKILWSLHTETQAVEVDPQIAAKAKIAVERMIELSRALAK	K03517	nadA; quinolinate synthase [EC:2.5.1.72]		22.6208	22.2014	22.2812	21.4666	21.1436	21.0681	22.5015	22.2668	22.1747	21.5024	21.5595	21.5963	21.7488	22.0524	21.9595	22.3678	21.2261	22.3143	21.5527	21.9202	0.181831	0.172827	0.137568	0.0386375	0.127009	0.00610054	0.00303319	0.00656412	0.00376145	0.0139999	-1.1417	-0.0534367	-0.815067	-0.44757	+		+	+	0.00299757	0.756949	0.00344003	0.0462185	1.08826	0.326633	0.69413
DMKJLJHC_00766 L-aspartate oxidase	MIETKRTIIVGAGLGALYAALKLAPRPVLVVSPETLGEGASSAWAQGGVAAAMAVSDSSEAHARDTVLAGAGTVSPEIAQMVTDEARQHILELTSLGTPFDRDAQGGYVMSREAAHSAARVVRVKGDQAGREIMHSLIGAVRKTPSIQVLEGVLAAGLEVDDDTVTGVWIERAYAPSGATLLRSPAVLLAGGGSGGLFAVTTNPPRIRGQVIGMAARAGAIIADPEFVQFHPTAIASGEDPAPLATEALRGEGAVLINAQGERFMTTVHPDAELAPRDIVARAVYLERKAGREPALDTRDALGAEVLTRFPAVAESCKRAGIDPVSQPIPVAPAAHYHMGGIDTDASGQSSLSRLWVCGEASSTGLHGANRLASNGLLEALVYARICALGIASELGEIA…	K00278	nadB; L-aspartate oxidase [EC:1.4.3.16]		22.3413	22.4422	22.4832	22.2278	22.35	22.7445	22.7386	22.9045	22.4423	22.4318	22.4173	22.3978	22.2478	21.9657	21.4743	22.4223	22.4408	22.6951	22.4156	21.896	0.0596351	0.220507	0.191196	0.0139536	0.319633	0.00633529	0.00703982	0.00854674	0.00684099	0.0137665	0.01853	0.272863	-0.00662333	-0.526297					0.914195	0.126289	0.885852	0.0839408	0.254333	-0.0251533	-0.544827
DMKJLJHC_00767 Nicotinate-nucleotide pyrophosphorylase [carboxylating]	MLPDLLIEPIVRTALVEDLAPMGDSTTKAVIPVGKTYAARLNAREDGVVSGMQVAAMAFRLVDASLRVQTFVADGAACGPGATLMTIEGSAASILMAERVALNFAGRLSGIATKTAGFVAETAGSKTRITCTRKTTPGLRVLEKAAVAHGGGFNHRFGLSDAILIKDNHIAAAGGVRQVLEAAKAARSHMMRIELEVDTLRQMEEALTIGGADVILLDNMSTDELRAAVALNAGRVTLEASGNMALERIAEVAATGVDYISAGALTHSARTLDLGLDF	K00767	nadC; nicotinate-nucleotide pyrophosphorylase (carboxylating) [EC:2.4.2.19]		23.3739	23.0692	23.4645	23.6952	23.4298	23.4156	23.7467	23.7029	23.6726	23.4187	23.5025	23.5744	22.1769	21.1318	22.4154	23.3025	23.5135	23.7074	23.4985	21.9081	0.169097	0.128585	0.0304295	0.0636351	0.55746	0.0116614	0.0148078	0.0172398	0.0144911	0.0138824	0.21102	0.40491	0.196017	-1.39445		+		+	0.232773	0.0290279	0.19974	0.0276508	0.19389	-0.0150033	-1.60547
DMKJLJHC_00769 putative CtpA-like serine protease	MKKFMMAALGGTLAGAVLSTQVAAPLMAQETDKSATVYQQLDLFGDIFEKIRQDYVEPVDSKKLIEAAINGMLSSLDPHSSYLPPDDFADMRVQTRGSFGGLGIEVTQEDGFVKVVSPMDGTPAAEAGIKSGDFITAVNGESLMGLPLDEAVDKMRGPIGSEVKVTIVREGEKKPFDVTLTRDTIKLTAVKGSHDDNTVILRISTFNDQTFPNLQSSIKEQVKELGGMDKVDGFILDLRNNPGGLLTQAIKVSDAFLDKGEIVSTRGRNPQDSERFNATPGDLADGKPIVVLINGGSASASEIVTGALQDHHRAIVVGTKSFGKGSVQTVMPIQGEGAMRLTTARYYTPSGRSIQNLGISPNVVVPQPEPQAEDAAKEGEDKTPANRLTSEADLKGAIT…	K03797	E3.4.21.102; carboxyl-terminal processing protease [EC:3.4.21.102]		26.2325	26.2137	26.011	24.4632	24.5917	23.9315	26.411	26.017	25.9573	23.9733	24.443	24.6562	23.1259	21.9017	23.1834	26.1524	24.3288	26.1284	24.3575	22.737	0.100284	0.28579	0.201319	0.285306	0.591117	0.0840717	0.0260559	0.0923268	0.0262833	0.0246612	-1.82361	-0.02397	-1.79489	-3.41536	+		+	+	0.00104351	0.887493	0.00110243	0.00128926	1.79964	0.02872	-1.59175
DMKJLJHC_00771 2,3-bisphosphoglycerate-independent phosphoglycerate mutase	MSVPKPVILCILDGWGERPETEGNAPAQANTPNIDAIWANGTKSTLVTFGPDVGLPTGQMGNSEVGHTNIGAGRVVAMDLGQIDLAIEDGSFFDNAAILSFIETLKASGGAAHLMGVVSDGGVHGHLEHLLAAAKMVSEAGVPVKIHAITDGRDVAPDSAKRFVSELVERLPAGCEVVTVIGRYFAMDRDNRWDRVERAYNAMIKGEGQGADTPVAAVEASYDRKEMDEFIQPSVIGDYAGMQDGDGLFCLNFRADRAREILAAIGASDFDGFDTGKRPELAAMLGMVEYSDKHNAYMKTAYPKREINNTLGEWVAKQGKRQFHIAETEKYPHVTFFLNGGREEPWDGEDRFMPKSPNVATYDMQPEMSAPEVTDKLIGAIEAGYDLIVVNYANGDMVG…	K15633	gpmI; 2,3-bisphosphoglycerate-independent phosphoglycerate mutase [EC:5.4.2.12]		25.3733	25.1706	25.0297	24.8001	25.021	24.7844	25.1784	24.8916	25.0604	25.212	25.0271	25.0012	24.0291	21.9605	23.7648	25.1912	24.8685	25.0434	25.0801	23.2514	0.141033	0.10802	0.11767	0.093833	0.919196	0.0431814	0.0378767	0.0435229	0.0433719	0.0352263	-0.322697	-0.147737	-0.111067	-1.93973				+	0.0620496	0.318842	0.406281	0.0419766	0.17496	0.21163	-1.61704
DMKJLJHC_00772 hypothetical protein	MTAIDLARISANSIPNPAIALIGFQRTSQISRDARQAWEEGDRSLLEAEAAQRRDEIFSGALKEIYEEFTPISDALALMGRKPAHVIDIGCGQALNDALMVKAYDPRITLIDIEETKEQYHSWNSAGAGYASLAVAKAFLEENGARDVTTINPRETPDALSGLSGDLVTSLISCGFHYPIGEYLPLMLKTIRAGGVVILDLRTRYFKAPDAALTELLENSRQITLSTLPRRRRILFAQ			K07755	23.1117	23.2316	23.2374	23.9992	23.7312	23.7923	23.6351	23.7496	23.7272	23.9838	23.8835	23.7477	22.5867	22.381	21.5754	23.1936	23.8409	23.704	23.8717	22.1811	0.0579362	0.114691	0.0495474	0.0967721	0.436407	0.0108134	0.0185797	0.0171988	0.0187685	0.0167745	0.647307	0.510383	0.67807	-1.01253	+	+	+	+	0.00205201	0.000694165	0.00104963	0.0312971	-0.136923	0.0307633	-1.65984
DMKJLJHC_00776 3-isopropylmalate dehydratase large subunit	MSAPKTLYDKIWDAHVVSRDEDGTCLLYIDRHLVHEVTSPQAFEGLRMTGRTVRKPENTIAVPDHNVPTTTDRAKGIENEESRIQVDALDKNARDFGVHYYPVSDVRQGIVHIVGPEQGWTLPGMTVVCGDSHTATHGAFGALAHGIGTSEVEHVLATQTLIQSKSKNMKVEITGKLRPGVTAKDITLSVIGATGTAGGTGHVIEYCGEAIRSLSMEGRMTVCNMAIEGGARAGLIAPDETTFNYVKGRAHAPKGAQWEAAMNWWKTLYTDEDAHFDKVVTIRGEDIEPVVTWGTSPEDVLPISGVVPAPEDFKGGKVDAAKRALDYMGLKPGTKLDDIPIDVVFIGSCTNGRIEDLRAAAEVLKGRKLAPGVRAMVVPGSGLVRAQAEEEGLDQIFLD…	K01703	leuC; 3-isopropylmalate/(R)-2-methylmalate dehydratase large subunit [EC:4.2.1.33 4.2.1.35]		25.6182	25.7017	25.5455	23.9999	24.1608	23.9627	24.4237	24.4645	24.6791	23.8854	23.7617	23.8563	21.3895	21.5099	22.064	25.6218	24.0411	24.5224	23.8345	21.6545	0.0638192	0.0859552	0.112039	0.0527992	0.29371	0.0581995	0.0213457	0.0303304	0.0182909	0.0116447	-1.58066	-1.09934	-1.7873	-3.96731	+	+	+	+	3.10877e-05	0.000271303	6.86955e-06	4.8483e-05	0.481313	-0.206643	-2.38665
DMKJLJHC_00780 hypothetical protein	MSRRVLILGMGGQFGSAAARSFRAAGWNVDRYHRGTDIGIAARGARWIINAMNPPNYHDWDTQIPKITSEVLAAARDSGASLMVPANVYVYGREPSPWGPETPHHACTRKGRIRAEMESRYRDYASEGNSVVMLRGGDFVNPESPSSLLNQVVLKDLRKGKITAMGKLDARRCYADLGDLTQIAVALADTADSLPGLLDLCYPGTVFSFRELADELGRQLGREISIKRFPWTMMSLASPVWELARELREMRYLYDMDHQIDGTGFADLFPDFEPKTLQRLVFEHLYLRGMKVVPDAQGASAMSTQTSL				19.3484	20.3809	19.876	21.3554	19.3147	21.6688	22.4925	22.2101	22.691	21.6716	21.3666	21.0462	22.1653	21.5194	22.0895	19.8684	20.7796	22.4646	21.3615	21.9247	0.421566	1.0437	0.197308	0.25534	0.28828	0.00107892	0.00222588	0.00728446	0.00329445	0.0140439	0.911193	2.59613	1.49303	2.05631		+	+	+	0.316135	0.00139681	0.0128063	0.00469918	1.68494	0.58184	1.14512
DMKJLJHC_00781 3-isopropylmalate dehydrogenase	MSNPSILILPGDGIGPEVMAEVRKVIDWFGAKRDLAFDVSEDLVGGAAYDAHGAPLSDETMARAQEVDAVLLGAVGGPKYDVLDFSVKPERGLLRLRKEMDLFANLRPAQCFDALADFSSLKKDIVAGLDIMIVRELTSGVYFGEPRGIFEEGNERVGINTQRYTESEIERAARAAFELAMKRNKKLCSMEKANVMESGILWREVVTRVGEEYPEVELSHMYADNGAMQLVRAPKQFDVIVTDNLFGDILSDCAAMLTGSLGMLPSASLGAPMANGRPKAMYEPVHGSAPDIAGQGKANPIACILSFAMALRYSFDQGDEATRLETAIEKVLADGVRTADLMGPEGGTPVSTTQMGDKIIEALDASL	K00052	leuB; 3-isopropylmalate dehydrogenase [EC:1.1.1.85]		27.9497	28.0533	27.7967	27.0342	27.0958	27.1678	27.2662	27.3971	27.1624	27.2121	27.3491	27.2894	27.3272	21.8105	27.1288	27.9332	27.0993	27.2752	27.2835	25.4222	0.105415	0.0545732	0.0960386	0.0560921	2.55511	0.288892	0.177787	0.204433	0.199754	0.158607	-0.833977	-0.658	-0.649727	-2.51105	+	+	+		0.000576174	0.00284836	0.0015344	0.237264	0.175977	0.18425	-1.67708
DMKJLJHC_00790 Biosynthetic peptidoglycan transglycosylase	MAKKNTRRKPRRGQTRPGLKTRLKAPLRLCAKWLGRAALAVVGIYVALIVLFAFVNPPTDYYMWSERHRLGAIDQEWVPMKDIAPVMARSVVAAEDANFCNHWGFDMHAIREAIDDGSKRGASTITQQVVKNVFLWQGRSWVRKAIEAALTPVVEAIWSKRRILEVYLNMAEFDNGAFGVDAAAHRYFRTTPDKLTARQAALIAAVLPDPKGRSASKPSNFVSRRANAIIDGAATIDNDGRARCFQ	K03814	mtgA; monofunctional glycosyltransferase [EC:2.4.1.129]		20.3319	20.6485	20.9615	19.258	20.8016	19.2836	20.1403	19.3312	18.3607	19.3012	19.4617	20.2545	22.1924	22.3441	21.6296	20.6473	19.7811	19.2774	19.6725	22.0553	0.25703	0.721704	0.727503	0.416729	0.307359	0.00185119	0.00111405	0.000799759	0.00102177	0.0153745	-0.866233	-1.36991	-0.9748	1.40804			+	+	0.185058	0.0659934	0.0480424	0.00765211	-0.50368	-0.108567	2.27427
DMKJLJHC_00792 Glutamate synthase [NADPH] large chain	MTKFDEAWVTAQEAKRQWMNENSLWKEEDEKASCGVGLVVAIDGKATRKVVESGIDALKAIWHRGAVDADGKTGDGAGIHVQIPAPFFYDQIRRTGHEPDMEKMVAVGQVFLPRTDFGAQERCRTIVESEVLRMGHYIYGWRHVPVNTEVLGEKANATRPEIEQILIRNDKDIDDVQFERELYIIRRRIEKAAVAAQVNGLYMCSFSCRSIIYKGMMLAEQVAEFYPDLKDERFESAFAIYHQRYSTNTFPQWWLAQPFRMLAHNGEINTIKGNINWMKSHEIRMASSAFGDSAEDIKPIIPAGASDSGALDAVFELMVRSGRSAPMVKTMLVPEPWSNDDTMPKALRDMYAYSNAVIEPWDGPAALAMTDGRWVCGGLDRNGLRPLRYVITGDGVLIA…	K00265	gltB; glutamate synthase (NADPH) large chain [EC:1.4.1.13]		26.4837	26.5217	26.4428	25.418	25.4595	25.1832	25.0557	24.9743	25.1018	25.207	25.5769	25.5466	22.312	21.8265	21.4903	26.4827	25.3536	25.0439	25.4435	21.8763	0.0322256	0.121641	0.0526978	0.1677	0.337276	0.105705	0.0530144	0.0435379	0.0557956	0.0135799	-1.12918	-1.4388	-1.03924	-4.60647	+	+	+	+	0.000222075	5.06457e-06	0.00100174	4.31185e-05	-0.309613	0.0899467	-3.47729
DMKJLJHC_00795 Glutamate synthase [NADPH] small chain	MAKQPMLKFVKTAKEMPQKRDADVRSHDFGEIYREFAAEKAAEQSGRCSQCGVPYCQSHCPLHNNIPDWLRLTAEGRLQEAYEISQATNTFPEICGRICPQDRLCEGNCVIEQSGHGTVTIGAVEKYITDTAFDMGWVKPIKPATDRAESVAIIGAGPGGLSAADVLRRAGVQVTVYDRYDRAGGLLTYGIPGFKLEKDIVMQRVKQLEDGGVEFVLNCNVGTDISFDAIRGKHDAVLIAAGVYKTRELTNEGADAAGIVRAIDFLTASNKKSFGDDVPEFEDGTLNASGKRVVVIGGGDTAMDCVRTAIRQGATSVKCLYRRDRANMPGSQREVQNAEEEGVEFVWLAAPAGFSGNPVSQVSVQKMRLGAPDASGRQSPEKIEGGIYEEGADLVIKAL…	K00266	gltD; glutamate synthase (NADPH) small chain [EC:1.4.1.13]		24.2159	24.6025	24.3049	22.9693	22.9549	22.3883	23.7249	23.5889	23.4392	22.7282	23.2836	22.9539	22.3292	21.7095	20.8435	24.3744	22.7708	23.5844	22.9886	21.6274	0.165314	0.270558	0.116684	0.22806	0.609296	0.024515	0.00884927	0.0158302	0.0101764	0.0114284	-1.60363	-0.790087	-1.38586	-2.74703	+	+	+	+	0.00202158	0.00525194	0.00224205	0.00353843	0.813547	0.217777	-1.14339
DMKJLJHC_00797 dTDP-4-dehydrorhamnose reductase	MSKLVTIYGGSGFVGRYIARRLAKEGWRIRVAVRRPNEALFVKPYGAVGQVEPILCNIRDEDSVRAAMQGADAVVNCVGILVNEGKNKFGAVQTEGAARVARLAAEQGIGQLVQISAIGANPESDSEYARTKAAGEKAVLDAYPNAVILRPSVIFGNEDGFFNKFAAMTRLTPVLPITGGKTKFQPVYVDDVAKAAVMGVNGKVAPGIYELGGPDTESFRNLITEMLESINRRRFVVSLPFWMAGILAGVFDLMQAVTGGLFVNRTLTRDQVKSLSADNVVAPDAKGFADLGIQPTAMEAVLPGYLWRFRPGGQYDAIKASAKNLRKSI	K00329	E7.1.1.2; NADH dehydrogenase [EC:7.1.1.2] / E1.6.99.3; NADH dehydrogenase [EC:1.6.99.3]	K00356	26.2838	26.3198	26.3384	26.0913	26.2898	26.1289	26.0952	25.9317	26.232	26.2229	26.2098	26.2093	25.0793	21.2785	21.707	26.314	26.17	26.0863	26.214	22.6883	0.0226717	0.0860802	0.122755	0.00631404	1.69974	0.0940347	0.0933602	0.0896705	0.0951795	0.0238412	-0.143983	-0.22766	-0.09996	-3.62572			+	+	0.0840887	0.0613817	0.00386667	0.0393025	-0.0836767	0.0440233	-3.48173
DMKJLJHC_00801 Ribonuclease D	MAIHLYERDLPDGLDLGPVVAVDTETMGLDPRRDRLCLVQLSAGDGNAHLVKIAKGQTEAPRLTALLADPGCEKLFHFARFDIAALYNAFGVVTRPVFCTKIAAKMVCTFTDRHGLKTLLHEIVGVDISKQQQSSDWGAPELSMAQKEYAASDVLHLHKLRDALEKRLIREDRLDLAQACFDFLPTRAQLDLLGWGEPNDIFHH	K03684	rnd; ribonuclease D [EC:3.1.13.5]		21.5593	20.5809	20.4988	20.9584	20.6618	20.9377	19.0101	21.8559	21.4926	20.9136	20.9787	20.8925	22.2957	21.9746	22.0611	20.8796	20.8526	20.7862	20.9283	22.1105	0.481765	0.135226	1.2646	0.0366937	0.135663	0.00217467	0.0023414	0.00227596	0.00243992	0.0159735	-0.0270267	-0.0934233	0.0486167	1.23083				+	0.942781	0.926922	0.893722	0.025402	-0.0663967	0.0756433	1.25786
DMKJLJHC_00802 Arabinose 5-phosphate isomerase KdsD	MTSSTTDMTAPASVPETDYSATARRVIGIEAAGLAALADSLDGEFSRAVAMILATKGRVIVSGMGKSGHIGRKIAATLASTGTPAYFVHPAEASHGDLGMITESDLALVLSNSGETPELADLIAHTRRFSIPMIGVASRPGSTLLKQADLALVLPAAEEACGTGVVPTTSTTMTLALGDALAVALMEHRKFTAEHFRTFHPGGKLGARLATVGDLMHADLPLVTQDTPMTEALLVMSQKGFGVIGATNAQGRLSGIVTDGDLRRHMQGLLERSVAEVMTASPSTIRPGQLAEAAVAQMYARKITCLFVVEDEIPVGFIQIHDCLRAGIG	K06041	kdsD; arabinose-5-phosphate isomerase [EC:5.3.1.13]		22.397	22.1407	22.4151	22.3075	22.154	21.9683	22.8105	23.0633	22.7626	22.1633	22.4578	22.5566	22.843	21.6067	21.6205	22.3176	22.1433	22.8788	22.3926	22.0234	0.12533	0.13869	0.131918	0.167055	0.579551	0.00589193	0.00572806	0.00970715	0.00673251	0.0150381	-0.174293	0.561207	0.0749867	-0.294167		+			0.257728	0.0120459	0.638323	0.5216	0.7355	0.24928	-0.119873
DMKJLJHC_00805 Lipopolysaccharide export system ATP-binding protein LptB	MSDTVEPKIERRPVLDQEDGLQVTGLRKSYKRRAVIRDVSLHVSRGEVVALLGPNGSGKTTCFYNIAGLIRPDAGQVKLDGRNVTRLPMYRRAKLGIGYLPQEASIFRGLTVEKNILAVLEIALPDPHSRRERLEELLGDFSIAHLRHAPAMALSGGERRRCEIARCLAADPKYLLLDEPFAGVDPIAVSEIRALVSQLKGRGIGVLITDHNVRETLEIVERAYILHDGKVLMSGTTEEVVQDENVRRVYLGQNFRIL	K06861	lptB; lipopolysaccharide export system ATP-binding protein [EC:3.6.3.-]		19.2039	21.1346	21.1818	21.278	21.0215	20.8035	21.4252	20.8667	21.2953	21.1408	21.2177	20.712	22.4184	20.796	22.5045	20.5068	21.0343	21.1958	21.0235	21.9063	0.921491	0.193927	0.238622	0.222515	0.785897	0.00167937	0.00265566	0.00302305	0.00260641	0.0138652	0.527547	0.68898	0.51672	1.39949					0.472539	0.363881	0.483799	0.177557	0.161433	-0.0108267	0.871947
DMKJLJHC_00806 Ribosome hibernation promotion factor	MRYQISGKQLDIGEALQTHVKTELSETVDKYMQRPTDAQITFSKHAHEFICEATVHLSTGLTATAKGHATEIYSAFESCREKMDKQLRRHKRRLKDHHRDRAEPVEFEAAGLYVLAAEQESESDEPASEAPMIVAEMETQVPTLSVGEAVMQMEISDAPLLVFRNEKHGGVNVVHRRDDGNVGWIDPRHSK				25.8495	25.9159	25.9207	24.3522	24.6444	24.5751	24.7478	24.5582	24.5963	24.3324	24.3174	24.1679	24.2484	22.2753	21.4443	25.8954	24.5239	24.6341	24.2726	22.656	0.0324631	0.124678	0.0818518	0.0742554	1.17596	0.0703516	0.0298292	0.0327715	0.0247806	0.0233143	-1.37145	-1.26124	-1.62279	-3.23935	+	+	+	+	0.000113457	3.50651e-05	9.25269e-06	0.0176285	0.11021	-0.251337	-1.86789
DMKJLJHC_00808 hypothetical protein	MPKFESFVIFAEMRTGSNLLEAALNALPGIHCHGEAFNPVLIGYPNRKELLSISQSQRDADPTVLWKAIRQTDGLNGCRFFHDHDPRMLDTFLNDPKCAKIVLSRNPIESYISLKIARATGQWKLGDAKHRKREKAHFDAAEFEAHLEALQSFQVSLLNALQKSGQTAFYIDYEDAQSLEVINGLAEWLGLEGRLSALPDTLKVQNPEPLDSKVANFAGMENSLARIDRFNLSRTPNFEPRRGPGVPGFIGCKEAGLLYMPIRPALDVQIRDWMGKIGGLEEGFSQKTLRQWKRRQTGHRSFTVLRHPLMRAHLALSAVLEWDSLLETRAILRKSYKLPLPEEGKALPPEQWGEALLAFLAWIKMSIANQTALPVNPLWATQSTLLQGMAQFALPDLLV…				22.208	22.4139	22.3084	22.3396	22.3071	21.9994	22.0025	21.5841	21.4422	22.6116	22.2938	22.5096	21.507	21.2408	21.7561	22.3101	22.2154	21.6763	22.4717	21.5013	0.0840832	0.153253	0.237872	0.13245	0.210392	0.00586157	0.00602148	0.00421789	0.00711187	0.0104718	-0.0947667	-0.633867	0.161523	-0.808823		+		+	0.486014	0.0237332	0.219098	0.00723869	-0.5391	0.25629	-0.714057
DMKJLJHC_00809 hypothetical protein	MTVGFIMMCHTALDRAAQVARYWASSGAPVVIHVDARVSAHDFAALGHSLSDLEDVSFSRRYKCEWGTWPLVAASQSAAEQMLARHRDVRHVYLASGSCLPLRPVSELTEYLAARPHTDFIESVTTTEVGWTVGGIDIERFTLRFPFSWKKQRRYFDRYVELQRRIGFKRRIPDGLVPHLGSQWWCLTRQTLSAILEDPDRSLYDRYFKRVWIPDESYFQTLTRLYATSVESRSLTLTKFDFQGKPHIFYDDHLQLLRRSDCFVARKIWPKADKLYRTFLAPSNGSSAMAEPNPAKIDRLFSKSIERRTKGRPGLYMQSRFPKKDHENGKTSAPYSIFHGFSDLFENFEGWLSKYVAARVHRHLFAPGAAEFAGGETMFNGGLTDSAVLRDYDPRAFLT…				20.8804	20.875	21.5121	21.6615	18.6271	21.3277	19.4003	20.471	21.0566	21.2583	21.5128	21.3983	22.2013	21.4286	22.324	21.0892	20.5388	20.3093	21.3898	21.9846	0.299086	1.35861	0.685785	0.104049	0.396359	0.00251463	0.00188367	0.00163528	0.00335983	0.0146389	-0.550393	-0.77991	0.300627	0.895413					0.605654	0.214436	0.250539	0.0632882	-0.229517	0.85102	1.44581
DMKJLJHC_00812 UDP-glucose 4-epimerase	MTQHVLVTGGAGYIGAHACKALKQAGYTPVCFDNLSTGWKQAVKFGPLEEGDLGDRARLDAVFAKYKPIAVMHFAALSLVGESMSNPSKYWSQNVMNALNLIEAAIAANCMNFVFSSTCATYGDQDGVILNEDTPQRPINAYGGSKRAIEDMLRDFGMSHGLNSVIFRYFNVAGADPEGEVGEQHVPETHLIPLMLDAIDGKRAALTVFGSDYATPDGTCVRDYVHVSDLVDAHVLGLKWLEDAKGNAVFCLGSGKGFSVREVIAASRSVTNRDVPIVEGERRAGDAASLVSGSRRALSELGWAPKRSELSTMIADAWRWHQAPEYEY	K01784	galE; UDP-glucose 4-epimerase [EC:5.1.3.2]		22.9805	22.7534	22.8392	22.8301	22.9631	22.9312	23.7475	23.8395	23.7793	22.8548	22.9755	22.7665	23.5503	22.1842	21.0438	22.8577	22.9081	23.7887	22.8656	22.2594	0.0936046	0.0566902	0.0381809	0.0856749	1.02469	0.00856752	0.00973307	0.0182395	0.00934481	0.0177108	0.05042	0.93102	0.00787	-0.5983		+			0.550212	0.000200561	0.934323	0.457091	0.8806	-0.04255	-0.64872
DMKJLJHC_00813 UTP--glucose-1-phosphate uridylyltransferase	MKSKVTKAIFPVAGLGTRFLPATKSIPKEILTLVDRPLIQYAIDEARAAGIEEFIFVTSRGKSALEDYFDTAPELETALREKNKTALYDELQKTNMDSGAIAYVRQNKPLGLGHAVWCARRLVHDEPFAVILTDDVIAAEKPCLQQMMESYEETGGNIVAAMEVPHEKTSSYGVLDCDASGGEVSVRVKGMVEKPAPEDAPSNLAVIGRYILTPKVMQNLNAMKMGAGGEIQLTDAIAQEIEEGNPVYGYRFRGQRYDCGTKAGFLQATVAFGLQRPDLQDEFSEYLGDVMSMRTAAE	K00963	UGP2; UTP--glucose-1-phosphate uridylyltransferase [EC:2.7.7.9]		24.6196	24.6625	24.667	25.3988	25.3989	25.4101	27.3659	27.1896	27.4166	25.6171	25.6596	25.4782	22.4303	21.9299	21.1326	24.6497	25.4026	27.324	25.585	21.8309	0.021373	0.00527739	0.0972679	0.0774254	0.534364	0.0296683	0.0548473	0.211465	0.0615434	0.0131597	0.7529	2.67433	0.935263	-2.81877	+	+	+	+	1.09339e-06	2.87121e-06	7.96297e-05	0.0017306	1.92143	0.182363	-3.57167
DMKJLJHC_00814 8-amino-3,8-dideoxy-manno-octulosonate cytidylyltransferase	MSVLIVIPARYASTRYPGKPLVALTGATGQSKTLIQRSWEAAISVTGVDRVVVATDDDRIRTAAEGFGAEVVMTSEACRNGTERCAEAAARLESDYDIIVNLQGDAPLTPAWFIEDLVAGLRANDWAELATPVLRCEGAMLASLREDRHHGRVGGTTAVFGTGNKALYFSKEVVPFTAKIYQPDEPTPVFHHVGVYAYRPDTLAAYPDWPTGPLEGLEGLEQLRFLENDRAVLCVEVDARGRQFWELNNPSDVSRLETMMAEMALA	K00979	kdsB; 3-deoxy-manno-octulosonate cytidylyltransferase (CMP-KDO synthetase) [EC:2.7.7.38]		22.1215	21.9677	22.0205	21.7422	22.1315	21.5259	22.0862	22.1429	21.9872	21.8166	21.8998	21.5062	22.5125	21.1685	20.9596	22.0365	21.7999	22.0721	21.7409	21.5468	0.0638106	0.250583	0.0643062	0.16939	0.68809	0.00484905	0.00451472	0.00554953	0.0042854	0.0108077	-0.236663	0.0355633	-0.29569	-0.489697					0.265215	0.608363	0.0820152	0.372974	0.272227	-0.0590267	-0.253033
DMKJLJHC_00815 3(2),5-bisphosphate nucleotidase CysQ	MDFEHLTRVMRRLALEAGDKIMEIYNAPDFDVKTKSDNSPVTEADEAADALISAGLRAEFPDIALVTEEQAASHTQTVSTFLIVDPLDGTKEFVKRRGDFTVNIAYVKDGKPLRGVVYAPAKQRLFYTLADGRSVEEAGPTFDKEAPGKREPISVSVPDNRALRVVASKSHRDEATDNYIGQYAVVDMKSAGSSLKFCLVATGEADLYPRLGRTMEWDTAAGDAVLRGAGGEVIRFDDHTAFTYGKSGFENPFFIAYAPGVLLVK	K01082	cysQ; 3'(2'), 5'-bisphosphate nucleotidase [EC:3.1.3.7]		25.8396	25.6812	25.7848	25.9411	25.6695	25.8736	26.1365	26.1349	26.1949	25.788	25.8825	26.0112	23.9622	22.5724	23.9523	25.7686	25.828	26.1555	25.8939	23.4956	0.0656774	0.11544	0.0279237	0.0914739	0.652835	0.0644322	0.0736591	0.0940734	0.0762396	0.041723	0.0594833	0.386903	0.12534	-2.27292		+		+	0.560894	0.0015558	0.190582	0.00804969	0.32742	0.0658567	-2.3324
DMKJLJHC_00817 HTH-type transcriptional regulator GntR	MSRPTDLRRPLTLRDVSEASGVSEMTVSRVLRNRGDVSDTTREKVLRAAKALGYVPNKIAGALASQRVNLVAVIIPSLSNLVFPTVLSKISDELEDTGLQPVVGVTNYKPEKEEQVLYEMLSWRPSGVIIAGIEHTPAARAMLENAGIPVVEIMDVDGNGVDSVVGISHRRAGLHMAEAIVAAGYRRIGFLGTKMPEDHRARKRYEGFCEGLAQHGITLADTEFYAGGSALAKGREMTEAMLKRTPDLDFLYYSNDMIGAGGMLYCTDAGLDVPGKIGLAGFNGLELLHGFSQRLATMDACRGEIGRKAAQIVAGRSQSGQIGGEVIELEPVLEPGDTIRKR	K06145	gntR; LacI family transcriptional regulator, gluconate utilization system Gnt-I transcriptional repressor		22.8479	22.9805	23.0537	22.3939	22.9206	22.7068	23.5314	23.0871	23.136	22.7273	22.7084	22.8375	21.6337	21.6498	21.4776	22.9607	22.6737	23.2515	22.7577	21.5871	0.0851929	0.216313	0.198905	0.0569478	0.077663	0.00920149	0.00827353	0.0125685	0.00867168	0.0111131	-0.286963	0.290777	-0.202973	-1.37365			+	+	0.155813	0.130173	0.0487529	7.26883e-05	0.57774	0.08399	-1.08669
DMKJLJHC_00819 Carboxynorspermidine synthase	MKQNVLIIGAGGVAQVVAHKCAQNNDLFGDLHIASRTKSKCDAIIDSVHEKGAMKEKGIFEAHALDAMNVAATAALIRKTDAGIVINVGSAFVNKYVLDACIETGAAYIDTAIHEEPDKICEAPPWYGNYEWKKRDLCAEKGVTAILGAGFDPGVVNAYARFAIDRMDEVKSIDIVDINAGSHGKYFATNFDPEINFREFTGTVYYWEDQTWKELSMFESGKTWDLPVVGPSKAYQSGHDEVHSLATNYPQADVRFWMGFGDHYINVFTVLKNLGLLSEQPVKLAEGQEVVPLKVVKAVLPDPSSLAPDYTGKTCIGDLVRGTKDGEEVEIFVYNVADHKEAYEEVGSQGISYTAGVPPVAAAILIAQGEWDTKTMKNVEELDPKPFFTVLDRLGLPTR…				26.089	25.9512	25.9947	25.7144	25.5051	25.7646	25.595	25.5539	25.595	25.6954	25.5389	25.4261	25.8392	21.9717	23.4113	26.0116	25.6613	25.5813	25.5535	23.7408	0.0575188	0.112388	0.0193842	0.110412	1.59601	0.076257	0.0656213	0.0631853	0.0602139	0.0494498	-0.350303	-0.43038	-0.45819	-2.27088	+	+	+		0.0171905	0.000556035	0.00649458	0.11468	-0.0800767	-0.107887	-1.92058
DMKJLJHC_00820 Carboxynorspermidine/carboxyspermidine decarboxylase	MSDTPFYLIDETRLLENMRKIAHLRERSGAKALLALKCFATWSAFDTMKPYLDGTTSSSLFELHLGHEKFGKETHAYSVAWSDDEIDEAISYADKIIFNSLSQLERFGDKAAHIERGLRLNPRFSTSGFDLADPARPFSRLGEWDLNRLESALDRISGVMIHYNCENGDFALFDQQLSRIEAEFGDILKRLDWVSLGGGIHFTGEDYPLDALADRLKRFADAFGVQVYLEPGEASITQSASLEVSVLDILDNGKKIAIVDSSIEAHMLDLLIYRETAKLPQSGDHAYQIAGKTCLAGDIFGEASFDAPLQIGDRISISDAAGYTMVKKNWFNGVAMPAIAIRRVDGTIERVRDFTYEDYRASLS	K13747	nspC; carboxynorspermidine decarboxylase [EC:4.1.1.96]		23.2555	23.5798	23.6142	23.5666	23.6607	23.7819	23.7639	23.6229	23.7761	23.6179	23.657	23.4843	21.4812	20.7441	21.7299	23.4832	23.6697	23.7209	23.5864	21.3184	0.161605	0.0881036	0.0695081	0.0739211	0.418614	0.0132172	0.016501	0.017402	0.015401	0.00922481	0.186543	0.23774	0.103193	-2.1648				+	0.225066	0.128569	0.457648	0.00241304	0.0511967	-0.08335	-2.35134
DMKJLJHC_00827 Hydrolase	MMKAALVQLSSTDDPVKNLPVTLDFIREAAAAGAQFIATPECTNLISSDRAYQRTVLHHEHTDPTLALIRAEAEKLGVYVLIGSLCLKTRDDDGRFANRSFLIGRKGQINAWYDKIFMFDLDVSDTERYRESEGYRPGKAAVLAPSIYGQIGMSVCYDLRFPQLYRQLAQAGASILTIPSAFTQRTGKAHWETLVRARAIENTCFVLAPAQCGTHGAHQGCPRKTWGHSLAVSPWGDVLVDGGDEPGVSLVDINVDEVEATRLRLRSLFHDRSFDAP	K11206	NIT1; deaminated glutathione amidase [EC:3.5.1.128]		22.2798	22.8684	22.4898	22.1678	22.2569	22.5272	22.6186	22.5821	22.6706	21.7473	22.1789	22.0252	21.8123	22.1303	21.4094	22.546	22.3173	22.6238	21.9838	21.784	0.243584	0.152826	0.03633	0.178607	0.294986	0.00690275	0.0064622	0.00813434	0.00507136	0.0127387	-0.228743	0.0777533	-0.562217	-0.762007				+	0.32354	0.678352	0.0580442	0.0479771	0.306497	-0.333473	-0.533263
DMKJLJHC_00828 Glutaredoxin 3	MKRVEIYTTRTCPFCIMAKRLLEQKGVSYEETDVGADPHLRAKMMERAQGRRTVPQIFIDGKGIGGCDELHALDQSGKLDTMLAV	K03676	grxC; glutaredoxin 3		20.9125	20.8751	20.8858	20.1199	19.6928	20.8425	20.0012	19.782	18.6978	19.5554	21.3487	19.5286	22.4234	21.5887	23.0593	20.8912	20.2184	19.4936	20.1442	22.3571	0.0157477	0.474477	0.569846	0.851762	0.602213	0.00219209	0.00150855	0.000929099	0.00141696	0.0189517	-0.672747	-1.3975	-0.746927	1.46597		+		+	0.115579	0.0256554	0.282767	0.0262589	-0.724757	-0.07418	2.13872
DMKJLJHC_00830 hypothetical protein	MDTPPLLTDRAALMRQRARAARAPEMFLHEDASVELDERLQEVKRTFTSPALIAAFPDPWRAVLPGAKCVLDTDILDLEPGAHDLVVHAMGLHWANDPVGQMVQAAQALKPDGLFLGVMFGGQTLNELRAALAQAEASITGGLSARVLPMGEIRDLGALLGRAGFALPVADTVTRKVTYETPLRLLSDLRAMGETNALTARPRHFSRRDVMAEALRIYSEAYREADGRVRATFEMVWLTGWKPHAGQQKPLRPGSAAHRLADALGTFEIPAGDKPGR				19.2855	20.3044	20.3876	20.9817	21.0349	21.0737	20.8242	20.7486	21.4449	21.1313	20.9161	20.9078	22.141	21.7464	21.729	19.9925	21.0301	21.0059	20.9851	21.8722	0.501071	0.0377008	0.311956	0.103466	0.190234	0.00117583	0.00264788	0.00265029	0.00253792	0.0135412	1.03755	1.01337	0.992547	1.87963	+			+	0.0432383	0.0721361	0.0517205	0.0077082	-0.0241867	-0.0450067	0.842073
DMKJLJHC_00831 Trehalose-6-phosphate synthase	MGRLICLSNRIPTGANPSGGLVVALGDVLEETGGLWIGTSGETTDLPDITLREIEGGPFKRLCFDLTEEEQENYYAGYSNSVLWPLFHGRTDLMEIHQEYLNTYKRVNRRLAKMLAPIIQPDDRIWVHDFHFLPLAYELRVLGVQSPIGFFLHTPFPGPISMQALPNGREICQWLSNFDLIGLQAERDVRACLASMVEIGGGSDLGGNFMHLSPRQCRIEAFPISIDAGEFKELAERQIEELPDGIVKPNRSLMIGVDRLDYSKGVPQRFRAFGEFLARHEDWHRHVSLIQISPPTREGVQAYDDIREETEYLSGQINGTFADIQWAPIRFINRSVPREVLAGLYRASQVALVTPLMDGMNLVAKEYIAAQNPDDPGVLILSQFAGAAEQMAQALIVNP…	K00697	otsA; trehalose 6-phosphate synthase [EC:2.4.1.15 2.4.1.347]		21.9035	22.3015	21.9022	22.0802	22.1327	22.1029	22.6094	22.0525	21.9594	22.4404	22.2351	22.0325	22.1618	21.269	22.0128	22.0357	22.1052	22.2071	22.236	21.8145	0.187919	0.0214827	0.287024	0.166538	0.390511	0.00484628	0.00557898	0.00609388	0.00604003	0.0130111	0.0695267	0.171383	0.20026	-0.221183					0.630613	0.518866	0.322433	0.510368	0.101857	0.130733	-0.29071
DMKJLJHC_00833 Ferrochelatase	MTDDARARLAHAPADHPPVKAAKIGLLVANLGTPDGTDYWSMRRYLNEFLSDKRVIDLPRWKWQPLLQLIILSKRPFTSGANYKTIWNTEADESPLMTITKQQVHKLRAAVAARYGAEVVVDYCMRYGNPSTRSVVDRMVEQGCEKILFVPLYPQYAGATSATANDAFFSALSHQKRQPAARVAPEYFDRPSYIEALAASVERVYATLERKPDVLVASYHGMPKRYLMEGDPYHCQCQKTSRLLRERLGWDKSGIDTTFQSVFGREEWLKPYTVEHVAELARAGKKNIAVISPAFSADCIETLEEINGEIREAFEHAGGESFTYIPCLNDDDLHITALMDLVQENLAGWID	K01772	hemH; protoporphyrin/coproporphyrin ferrochelatase [EC:4.99.1.1 4.99.1.9]		24.7621	24.7634	24.8172	24.6596	24.9191	24.6816	25.1026	25.0976	25.1752	24.8434	24.8575	24.7908	21.9104	20.8139	21.7845	24.7809	24.7534	25.1251	24.8306	21.5029	0.0256736	0.117499	0.035457	0.0286977	0.489921	0.0324927	0.0349735	0.0460585	0.0364823	0.0104837	-0.0274533	0.34425	0.0496633	-3.27795		+		+	0.763008	0.000371951	0.142214	0.000699548	0.371703	0.0771167	-3.2505
DMKJLJHC_00836 C4-dicarboxylate-binding periplasmic protein DctP	MKKLTAAVSALALLATATIASADPTKCDPGEMVIKFSFVTNMDKHPKGIAAALFAKRVNEEMDGKACVELFPNSTLYNDDQVLEAMLQGDVQMAAPSLSKFETFTKVYRIFDLPFMFKNMEAVDEFQNSPVGQKMKDAMVRRGLQGLDFWHSGLKQFSANKPLILPSDAKGLKFRVQPSDVLIAQMKALGASPQPMAFSEVYGALQTGVVDGQENTWSNIYGQKFYEVQDGTTETNHGLLDYMVVTSVDWWQSLDPAVRDQLKSILDGVTKERNAAINDVEAQSRQAILDAGGVIRELTPEQRQQWVDVMKPVWAQFTDDVGQENIDAAQAINAKN	K11688	dctP; C4-dicarboxylate-binding protein DctP		27.5926	27.6529	27.5026	28.0567	28.2008	28.0672	27.2569	27.6581	27.5056	28.4689	28.5877	28.5512	28.2142	25.5758	27.4547	27.5827	28.1082	27.4735	28.5359	27.0816	0.0617572	0.065591	0.165353	0.0496723	1.10896	0.226582	0.357792	0.234558	0.475902	0.501005	0.52549	-0.10919	0.953213	-0.501187	+		+		0.00117798	0.431045	7.00626e-05	0.558076	-0.63468	0.427723	-1.02668
DMKJLJHC_00840 Glycine betaine/carnitine transport ATP-binding protein GbuA	MTKNIKVSIRHLYKIFGSDPLTALKDVEAGMGKPELLETHNHVLGLNDINVDMREGEITVIMGLSGSGKSTLIRHLNRLIEPTAGEVWVNGENILGYNEAQLRKLRRENMSMVFQKFALLPHRTVAENTAMALATRGIGPSEYKSEAEKWLARVGLGGYGDHHPHQLSGGMQQRVGIARALASNSDIMLMDEAFSALDPLIRTDMQDLLLELQAELHKTIIFITHDLDEALKLADHLVILNDGRVVQQGEPQEILLNPADPYIEDFVADINRARVLRVRSVMEKGAPQEEMSGDIDLNDNLESVIAKSQGALDRRYRVMRDGEPVGSLSMPSIMRALVPAQASGETAKR	K02000	proV; glycine betaine/proline transport system ATP-binding protein [EC:3.6.3.32]		25.8546	25.8114	25.8388	25.5034	25.4375	25.3695	24.6553	24.9128	24.7156	25.3727	25.402	25.6048	23.5233	22.0017	22.7928	25.8349	25.4368	24.7612	25.4599	22.7726	0.0178434	0.0546954	0.109959	0.103217	0.621351	0.0674661	0.0561633	0.0357898	0.0564315	0.025276	-0.398133	-1.07371	-0.37508	-3.06237	+	+	+	+	0.000610921	0.00016773	0.00716035	0.00223107	-0.67558	0.0230533	-2.66424
DMKJLJHC_00841 Glycine betaine/proline betaine transport system permease protein ProW	MAAYETLFNAVGLKDWCAGGGGGGTNMMSMADLIAKADGTSTQGPTLWNWPFPSLDVLHKACAAIPPSRDVTQGIETGFLAIRGGLRDVVDPLTQPLSWALNDMLWIMTNTPWWLMVPILMLITWFVTRSWRLVVFVLISIALLAFINHYTAAMETLAIIFVCAFICVLFGVPIGIAMSRSDRLQRIVIPILDMLQTLPPFVYLIPLIFLFSVTEPKLYGIAIILYAIVPVVRLTDLGIRLVDPDVIEAADAFGMTKRQKLFGVQIPLALPNIMAGVNQTIMMSLAMVVIASLVSAPGLGVLVLRGIRSLELGVGLVAGFGIVLLAILLDRVTKASLARIDTSKRRN	K02001	proW; glycine betaine/proline transport system permease protein		24.0352	23.8271	23.9869	23.6988	23.8066	23.931	20.5042	22.5452	22.5695	23.7346	23.324	23.1638	22.7965	21.783	21.1451	23.9497	23.8121	21.873	23.4075	21.9082	0.0889621	0.0948893	0.96795	0.240369	0.679942	0.0182636	0.0182128	0.00483405	0.0136049	0.0138837	-0.137613	-2.07677	-0.542263	-2.04156		+	+	+	0.208929	0.0391054	0.0402561	0.0135823	-1.93915	-0.40465	-1.90394
DMKJLJHC_00842 hypothetical protein	MRKFTLLAAAGATAMVTGFVAQTGTARAADQCGDVSIAQMNWAAAEVATNIAKFILDQGYGCKTSLVKSDTIPAITSIAENGRPDVVTNLWLNSAGDAYKKLEKEGKIKRVAKTLEPGGVEGWWIPTYLAKEHPELTTIKGVMEHPEWVGNRFNNCPDGWGCRVVSDNLIKALDLESSGIKVFNHGSGQTLASSIGSAFADKKPWFGYYWGPTVVMGNYDMTRVKLGDYDKAKFDNLQNKDATDPQVSDFPAAPVLTAVTSKFAKDHPTETEFFSKMSFKTDTMSQLLAWQDKNKASAEQTAVYFLQTYPDTWKTWLSPEASKKLSKLIGG	K02002	proX; glycine betaine/proline transport system substrate-binding protein		28.2986	28.2146	28.3736	27.8915	27.7932	27.7862	26.9496	26.8634	27.0977	27.7894	27.6069	27.5354	27.3401	21.7973	23.9636	28.2956	27.8237	26.9702	27.6439	24.367	0.0649786	0.0480636	0.0967611	0.106921	2.28075	0.37138	0.293743	0.165475	0.256437	0.0763276	-0.47194	-1.32538	-0.651707	-3.9286	+	+	+		0.0011732	8.74444e-05	0.00180964	0.0715935	-0.85344	-0.179767	-3.45666
DMKJLJHC_00876 HTH-type transcriptional regulator TauR	MTDTNWTADLTRHSGPKYLALVRALREGIRNGALLPGAKLPTVRDLAYSLGVTPGTVARGYQIATQEGLLEAVVGRGTFVSSQSRRLGPTEAIYNLPTRDPDLDDAIVDLRSPQLPDIGQTEALARAMMKAAEGIGRQYLEYPGLKRDEYCRRAALNWFSEYTDFDTVTPDDLVLTHGGQNGIMMVMQCCLRGERPVIYAEALAYPGFRHAARLNRAEIRGIAIDDEGMVPEALDAACRRYGGQLICVTPDAQNPTAGRMGIERRHALIAVARRHDLQIIEDDCYTAPVTGLPSLRSLAPERCWHVTSLSKSISAGMRFGIVVAPDGMGEAGRLTAQHSYFGLSRPVTDMMAHLFETGEALDLKARAQAEMGRRLQMLLQALGDQELGWQSGLSFVWLT…				20.8222	19.8939	19.6063	25.9115	25.8667	24.3797	25.858	26.0906	25.9692	25.6305	25.0282	25.8963	21.1806	21.5541	29.5615	20.1075	25.386	25.9726	25.5183	24.0987	0.518833	0.711799	0.0949691	0.363185	3.86575	0.00127333	0.0542193	0.0828744	0.0587657	0.0633768	5.27853	5.86515	5.41088	3.9913	+	+	+		0.00106247	9.55197e-05	0.00026911	0.221403	0.586617	0.132347	-1.28723
DMKJLJHC_00884 Alcohol dehydrogenase [acceptor]	MARDAALHAGLLWVSGHLWCCGADQKDIAMRNAETEFDYVVIGGGSAGCLLANRLSADSKNRVLLLEAGKPDTYPWIHIPVGYLYCIGNPRTDWMYSTEPDKGLNGRVLRYPRGKALGGCSSINGMIYMRGQSRDYDNWAKLSGEDEWDWEHSLRDFKSHEDHWKLDDGADPATGENSRFSDMHANGGEWRVEKQRLRWDVLDSFLDAAVQAGVEKTDDFNSGDNAGVGYFDVNQRSGWRWNSSKAFLRPAKTRSNLTIWTEAQVEKLTFETDASGALRCTGARVNRKGQTLTVSAKTETVLSAGAVNSPAILQLSGIGPAALLKSHGIEVLRDAPVGENLQDHLQIRAVFKVKGTRTLNTLAGNLFGKAMIGAEYLFKRSGPMSMSPSQLGAFTRSDP…	K00108	betA; choline dehydrogenase [EC:1.1.99.1]		20.6323	20.4017	19.2703	20.7304	20.9539	21.1436	21.7471	22.0002	21.9722	21.1813	20.9592	21.0039	21.379	22.0406	22.6902	20.1014	20.9427	21.9065	21.0481	22.0366	0.595172	0.168888	0.113282	0.0959428	0.535315	0.00126801	0.00249217	0.00494779	0.00265128	0.015176	0.841237	1.80512	0.946703	1.93517		+		+	0.126836	0.0135473	0.0905285	0.0268093	0.96388	0.105467	1.09393
DMKJLJHC_00891 DNA gyrase subunit A	MTDTPEPPETDENEPQRPSYLGPTVSIADEMKTAYLDYAMSVIVSRAIPDLRDGLKPVHRRILYAMHETGNTHDKSYRKSARPVGDVMGQYHPHGDAAIYDALVRMAQPFSMSLPLLDGQGNFGSMDGDNAAAMRYTEVRMDKPAAALLADIEKDTVDFQDNYDGKQQEPTVLPARYPNMLVNGAGGIAVGMATNIPPHNLGEVVDATLAMIDNPDISDEALMEFVPAPDFPTGAQIMGRGGARKAYLEGRGSVIIRAKTRIEEVRKDRYAIVLDEIPYQVNKATMIEKIAELVRDKRLEGISNIADESDRVGVRVVIELKRDATPDVVLNQLYRFTPMQTSFGCNMLALNGGKPEQLTLRLFLSHFITFREEVVARRTAYELRKARERSHVLCGLAVA…	K02469	gyrA; DNA gyrase subunit A [EC:5.99.1.3]		26.6382	26.302	26.5034	26.2773	26.3546	26.3998	25.3618	25.4307	25.4651	26.3371	26.4867	26.5773	21.9509	23.861	21.9783	26.4812	26.3439	25.4192	26.4671	22.5967	0.138156	0.050562	0.0429435	0.0990262	0.894039	0.105592	0.105321	0.0564712	0.113427	0.0223755	-0.137307	-1.06201	-0.0141467	-3.88448		+		+	0.257336	0.000486146	0.91198	0.00371518	-0.924703	0.12316	-3.74718
DMKJLJHC_00892 hypothetical protein	MKHYMIGLAAALAVATAGAAGAAEVSGANVGVSYSGLTGSSNDATKLTANGSMEVAFSPAFSVQGDMAYNHFGDTGWDGSMFGLHGIYHPMMGTSLGAFVGRDRVDGSNLNFYGLEAGRDMGLMNVQGYIWHTNSDDDGTAVGLSGDYALSNQFSVGGRLDVFNGPSSADFNRIGVTGTYKMTSGYSVYGEVGRLDADNADAEGYLGLGVRATFGPGTGTSFAQRGLLDMLPGL			K00963	25.0574	24.9806	25.2327	24.7831	24.9839	25.1058	24.2458	24.6979	24.4719	25.0694	24.9798	25.1391	25.2522	22.2449	24.4464	25.0902	24.9576	24.4719	25.0628	23.9811	0.105534	0.133034	0.184585	0.0651925	1.27105	0.0402633	0.0402904	0.0292854	0.0428535	0.0584155	-0.132627	-0.618383	-0.02747	-1.10909		+			0.331328	0.014696	0.769796	0.286165	-0.485757	0.105157	-0.976467
DMKJLJHC_00893 Methylenetetrahydrofolate--tRNA-(uracil-5-)-methyltransferase TrmFO	MTQELHIVGGGMAGSEAAWQAANAGIRVVLHEMRPKVETFAHQTGNFAEMVCSNSFRSDDDAQNAVGQLHWEMGAADGLIMQTAREHRLPAGGALAVDREAFAQAVTEKLRAHENISFVSEEITELPSSGHWIFATGPLTSQSLGDALREASGQDRLAFFDAIAPIVYADTIDMDIAWRQSRYDKGETEDERTAYINCPMTKDQYEAFIDALLASEKTEFHAGETAGYFDGCLPIEVMAERGRETLRHGPMKPVGLTNEHDPQVKAYAVVQLRRDNALGTLYNIVGFQTKMKYGAQADVFRTIPGLQDAKFARLGGIHRNTFLNSPTLLDSQMRLKSHPHLRFAGQITGVEGYVESAAMGLLAGRMAAAELQGRELPPPGPDTAMGALITHITGGAEAK…	K04094	trmFO; methylenetetrahydrofolate--tRNA-(uracil-5-)-methyltransferase [EC:2.1.1.74]		24.3303	24.236	24.2162	23.6077	23.5561	23.6203	23.8846	23.9315	23.649	23.4649	24.3177	24.1118	21.6288	21.9795	21.8371	24.2608	23.5947	23.8217	23.9648	21.8151	0.0497727	0.0277625	0.123595	0.363346	0.143991	0.0226582	0.015665	0.0186607	0.0200199	0.0130164	-0.666087	-0.439133	-0.29602	-2.44568	+	+		+	7.84687e-05	0.00958269	0.317354	2.22981e-05	0.226953	0.370067	-1.7796
DMKJLJHC_00895 Phosphoribosyl-AMP cyclohydrolase	MPFDPESLTYDANGLIPAIAQDFHTGEVLMMAWMNAQSIMKTLEDGHVTYWSRSRKALWAKGETSGHLQHLREMRIDCDRDCLLLLVDQKGPACHTNRRSCFYTALRDGDEVEILRPVED	K01496	hisI; phosphoribosyl-AMP cyclohydrolase [EC:3.5.4.19]		21.306	21.2869	21.1369	20.2828	20.7369	20.7459	21.1942	20.9704	20.8232	20.6083	20.8583	20.3844	21.543	21.9077	21.7928	21.2433	20.5885	20.9959	20.617	21.7478	0.0756251	0.216229	0.152544	0.193558	0.152243	0.00279807	0.00194971	0.00263206	0.00196638	0.012423	-0.65477	-0.24734	-0.62631	0.504527	+		+	+	0.0155742	0.109139	0.0130298	0.0137255	0.40743	0.02846	1.1593
DMKJLJHC_00898 ATP-dependent DNA helicase RecG	MSGRPESLFPLFAGLETLAGIGEKTAKSFEPLGISVPRDLLFTLPHSVIDRRPVPSVQGIASGTVVSVELRIDRHAPASGRGRPDRVFCHDGQIEVVLVFFHARGDWLAKQMPVGASRIVSGKLEIYDGVAQIVHPDHIVPPEQADDIARFEPIYPLTAGISQKVMTKAVRSALTLAPALGEWIDGPLKTREGWPDWHAALSAAHAPEGLSDVMGTSPARARLAYDELFAHQLTLALARRQARRKPGRATVATGVMSDKVLKSLPYSPTGAQTRAISEISADLASTRRMNRLLQGDVGSGKTLVAFMALLAAVEAGGQGVMMAPTEILARQHLEGLAPLAQAAGVRLDLLTGRDKGAERAAKLADLAAGRIGILVGTHAVFQKDVQFHDLRLSVIDEQH…	K03655	recG; ATP-dependent DNA helicase RecG [EC:3.6.4.12]		21.4694	21.5981	21.46	21.3378	21.6152	21.4048	21.4206	19.6342	21.4675	22.0257	21.5008	21.2831	22.1913	21.7184	22.4277	21.5092	21.4526	20.8407	21.6032	22.1125	0.0629768	0.118168	0.853393	0.311668	0.294902	0.0033643	0.00354884	0.00236362	0.00389538	0.0159954	-0.0565533	-0.668403	0.0940433	0.603303				+	0.582481	0.331286	0.697227	0.0473756	-0.61185	0.150597	0.659857
DMKJLJHC_00899 DNA ligase	MSDQSVIGIDNLTKAQAKAELPELVARIRGANTAYHTQDDPELSDSEYDALKRRLLAIEARFPELKAKDSPSEAVGGQLAEGFGKITHAQRMMSLANAFEDADITEFDSGVRSFLGLAADAPLAYTAEPKIDGLSLSLRYEQGRLIYAATRGDGAVGENVTENARTIDDIPQEITGAPDVLEVRGEVYMSHADFAALNARAEAAGDKRFANPRNAAAGSLRQLDPKITAARPLRFFAYAWGVSSEPLAETQIGAIERLSELGFSTNPLTLRCDGPEEMLAHYHQIEAQRADLGYDIDGVVYKLDDLALQRRLGFRSTTPRWAIAHKFPAELAWTRLEAIEIQVGRTGALSPVARLTPVTVGGVVVSSATLHNEDYIAGRDSQGAEIRGGKDIRVGDLVQ…	K01972	E6.5.1.2; DNA ligase (NAD+) [EC:6.5.1.2]		24.886	24.8325	24.7679	24.3018	24.0067	24.0469	24.4681	24.6003	24.3736	24.1493	24.1554	24.1975	22.1646	21.1396	20.963	24.8288	24.1185	24.4806	24.1674	21.4224	0.0483016	0.130674	0.0929678	0.0213898	0.529747	0.0335904	0.0225213	0.0294641	0.0230387	0.00991456	-0.710357	-0.34819	-0.661407	-3.40641	+	+	+	+	0.00196089	0.00930764	5.97618e-05	0.000823885	0.362167	0.04895	-2.69605
DMKJLJHC_00904 hypothetical protein	MATKKTPFGTSMAGCMPVLDGAGLSSMLAPQLQMAEALIARNIETLDFLRARFERDQEMLARLSEERDPMQAMNLWSAFWQRTMSDYSSEMAKLATSASALAETAVRTATQEGEAMARQASGKR			K01992	23.49	23.5725	23.4424	19.8168	21.3443	21.917	21.7028	20.9367	21.5428	21.9227	19.8362	20.6509	22.0914	21.604	21.287	23.5016	21.026	21.3941	20.8032	21.6608	0.0537668	0.886466	0.32993	0.858585	0.330861	0.0133872	0.00264047	0.00346862	0.0022374	0.0116961	-2.47559	-2.10753	-2.69838	-1.84081	+	+	+	+	0.016929	0.000874745	0.0113696	0.00148162	0.368067	-0.22279	0.63478
DMKJLJHC_00909 D-beta-hydroxybutyrate dehydrogenase	MYLNLKDKVCIVTGGASGIGKAIAIRYVEGGAKVAIADLNLDDAKTTAKELSEKGPGTAMAVEMDVTNEDQVNAGVKQVADAWGGIDVLVSNAGIQIVHPIEDFPFAQWKKLLSIHLDGSFLTSKAVIPYMKEKKQGSIIFMGSVHSKEASPLKSAYVTAKHGLLGLARVISKEGGAYGVRANVICPGFVKTPLVEKQIPEQAKDLGISEDEVVSKIMLGGTVDTEFTTVEDVAEVAYMFAAFPNNALTGQSLVVSHGWYMN	K00019	E1.1.1.30; 3-hydroxybutyrate dehydrogenase [EC:1.1.1.30]		25.2704	25.5996	25.482	25.7269	25.6707	25.7485	25.4639	25.4183	25.1061	25.7067	26.09	26.0559	24.9969	22.5599	23.9598	25.4506	25.7153	25.3294	25.9509	23.8388	0.136214	0.0328023	0.159021	0.173189	0.998569	0.0516892	0.0681242	0.0530648	0.0793099	0.0529287	0.264707	-0.121207	0.50022	-1.61179			+		0.0556969	0.458954	0.0325702	0.0865142	-0.385913	0.235513	-1.8765
DMKJLJHC_00926 Bifunctional protein PutA	MTDRFSAFTAQAKHADEPTLIADLVAQANLSKDTRVAISKRAETLVSRIRTEAQPTLMEHFLGEYGLSTSEGVALMCLAEAMLRVPDAETVDALIEDKIAPSDWGKHLGTASSSLVNASTWALMLTGRVLEDEKPGVAGVLRGAIRRLGEPVIRMAVTRAMKEMGRQFVLGQTIEAALDRAKTREKQGYTYSYDMLGEAAMTARDAARYKDSYSQAISAIAKSCTHGSVEANPGISIKLSALHPRYEVAQSERIMTELVPVVRELARQAKAAGMGLNIDAEEQDRLVLSLRVIEAVLSDPELAGWDGFGVVVQAYGKRAGLTIDWLYALAERLDRRIMVRLVKGAYWDTEMKLAQVEGLEDFPLYTSKSATDVSYIAHAKTLLSYADRIYPQFATHNAH…	K13821	putA; RHH-type transcriptional regulator, proline utilization regulon repressor / proline dehydrogenase / delta 1-pyrroline-5-carboxylate dehydrogenase [EC:1.5.5.2 1.2.1.88]		26.1239	26.0013	26.162	28.4033	28.2434	28.1667	28.2678	28.225	28.2399	28.2719	28.3544	28.4957	27.6042	24.7403	27.555	26.0957	28.2711	28.2442	28.374	26.6332	0.0685538	0.0985807	0.0177108	0.0924206	1.33863	0.0808329	0.400563	0.400171	0.425358	0.367167	2.17542	2.1485	2.27825	0.537443	+	+	+		1.37823e-05	1.76288e-06	9.67963e-06	0.600991	-0.0269133	0.10283	-1.63797
DMKJLJHC_00927 Glycine betaine-binding protein YehZ	MKTKLILAAIGVSAALASSAQADIVVSSKIDTEGGLLGNIIALSLEHAGMPVQRRLQLGGTQVVREAELSGQIDIYPEYTGNGAYFFNEPDSPVWKNAKAGHDRVAELDAKKNDLIWLDSAPANNTWAIAVTGPVAEKNHLVTMSDFGKWVAGGGDVKLAASTEFVSSPAVLPAMEAAYGFKLSPDQTVVLSGGDTAATIQAAARGTSGVNAAMAYGTDGGLGATGLVVMQDDKGVQPVYEATPVVRGAVLKEYPKIADVLNPIFTGLDLKTLQTLNGRIQVGGEPAEKVARDYLTKIGVLN	K05845	opuC; osmoprotectant transport system substrate-binding protein		24.6433	24.9413	24.8925	25.7932	25.7771	25.5364	25.4079	25.4337	25.3743	25.4917	25.4701	25.3653	23.8777	22.8562	22.4527	24.8257	25.7022	25.4053	25.4424	23.0622	0.130521	0.117426	0.0243082	0.0552274	0.599734	0.0335178	0.0675084	0.0559303	0.0557511	0.0308957	0.876543	0.579603	0.616657	-1.7635	+	+	+	+	0.00212246	0.00349563	0.00353878	0.0153067	-0.29694	-0.259887	-2.64004
DMKJLJHC_00929 Glycine betaine uptake system ATP-binding protein YehX	MIEIDQITKIYDGARAVDAVSMTVETGTITVIVGTSGSGKTTLLRMINRLVEPSSGDVRINGEATSEMSKTALRRRIGYAIQGHGLFPHYTVARNIGVVPQLLGWPAAKIAARVDELLDLFSMAPEQFRTRYPAELSGGQAQRVGVARALASRPDLLLMDEPFGALDPIIRARAQEDLRRIQRKLGSTIVLVTHDMQEAIQLGDRVAVMDAGRLVQHATPAQIITEPATEFVAEMVGGIERPLRLLSLIPACEIAQDGQIEGTPLPAQTSLRDVLAQCLASGRDAVPVLREDGTQGQVTLAAIRARAQSRA	K05847	opuA; osmoprotectant transport system ATP-binding protein		19.308	21.7848	19.8006	22.3828	22.4677	22.4809	22.6512	22.3851	22.3435	22.1948	22.7458	22.4275	22.0377	21.3868	22.3417	20.2978	22.4438	22.4599	22.456	21.9221	1.07053	0.0434745	0.136317	0.22582	0.398314	0.00145291	0.00705443	0.00726118	0.00703527	0.014018	2.14598	2.16216	2.15824	1.62429	+	+	+		0.0472211	0.0471818	0.0493261	0.114662	0.0161733	0.0122567	-0.521697
DMKJLJHC_00932 Gamma-glutamyltranspeptidase	MRRIATYLSACLLIGAPAFADTQNSAAAALPDVGVSGVTRAKLAAAKPVTAKHAMVVTAQHLATDVGVDILKQGGNAVDAAVAVGYALAVVHPCCGNLGGGGFMTVHLANGQNLFLDFREKAPLAATPDMFLDADGNADPKLSRESWLGTGVPGTVMGMDEALAKYGTMTRAQVMAPAIRLARDGFVLNAADVKLMDLRTKVFAAQPNVAKIFLHPDGSPYVAGERLRQPELAKTLELISKEGSKAFYEGPIAKAIVKASKADGGLFTMKDFAQYTAPWSKPVSCEYRGHEIISAPPPSSGGTTICEILQIIKPYPFGKWGYGSVKATHALVEAERRAFADRNTYLGDPAFVKNPVQELISQAHAEKLRATILPDRATPSSEIKGSLGANEGMHTTHYS…	K00681	ggt; gamma-glutamyltranspeptidase / glutathione hydrolase [EC:2.3.2.2 3.4.19.13]		26.174	25.904	26.2385	26.1984	26.0899	26.0443	25.0192	25.0126	24.8432	25.8262	25.7219	25.758	24.7252	21.6544	23.3205	26.1055	26.1109	24.9583	25.7687	23.2334	0.144887	0.0646466	0.0814536	0.043257	1.25515	0.0813833	0.0896111	0.0410296	0.0699026	0.0347873	0.00534667	-1.14717	-0.336803	-2.87215		+	+	+	0.964273	0.000617245	0.0345117	0.0324411	-1.15251	-0.34215	-2.8775
DMKJLJHC_00934 Alpha-ketoglutaric semialdehyde dehydrogenase	MTYTPHGQHLIAGTRTGADESFTSTPATGEGRTVCAGNAALIDRAVQAAEEAFWSFGATDRETRAVLLETIADEIEARGADITELAMSESGLPQARLEGERGRTTGQLRMFASHIRKGDYLDRRHDAALPDRKPAPRPDLRMMQQPVGPVAVFGASNFPLAFSVAGGDTASALAAGCPVVVKGHEAHPATGEIVAEAITAAIAKCGLPAGIFSLVQGGSRDVGEALVTHPLITAAGFTGSLGAGRALYDLCAKRPEPIPFFGELGSVNPMFLLPEAVAARGAEIGTGWAGSLVMGAGQFCTNPGIAVVLASQAEAIIEGARAALEGSGAQVMLTEGIAKAYRHGTAEVAKAKGVRDVFRSECDGRAATPNLFVVSGADWLAEPILSEEVFGPLGLLVTA…	K13877	aldH; 2,5-dioxopentanoate dehydrogenase [EC:1.2.1.26]		24.6574	24.5789	24.6656	23.9149	23.996	24.0052	24.2139	24.014	24.0335	23.9946	24.1915	24.0657	22.7508	22.2982	22.294	24.634	23.972	24.0871	24.084	22.4477	0.0390468	0.0405924	0.0899721	0.0814049	0.214329	0.0293464	0.0203477	0.0224302	0.0217437	0.020179	-0.661917	-0.54684	-0.55	-2.1863	+	+	+	+	7.67788e-05	0.00139887	0.00099786	0.000143117	0.115077	0.111917	-1.52439
DMKJLJHC_00939 Multiple sugar-binding periplasmic receptor ChvE	MKFLKLAGALAVSLVALSSMAQAEGELVGVAMPTKSSARWIADGDNMVKQLQAAGYKTDLQYAEDDIPNQLAQIENMVTKGANVLVIASIDGTTLSNALENAAAAGVKVIAYDRLIKDSPNVDYYATFDNFKVGVIQATSLVQGLKERFPDVHPWNVELFGGSPDDNNAYFFYNGAMSVLQPLIDSGDIVIPSGQMGMDKVGTLRWDGAVAQSRMDNLLSANYTDKQVNGILSPYDGLSIGIISSVKGVGYGSGDLKMPIITGQDAEIPSIKAIERGDQYSTVFKDTRELAKVTVNMVDAMVQGKEVPVNDTKTYDNGVKVVPSYLLEPTLVDKSNYEKTLVGSGYYTADQLK	K10546	ABC.GGU.S; putative multiple sugar transport system substrate-binding protein		21.209	21.7494	19.8372	23.1431	22.6348	23.2836	22.2002	22.2637	22.5623	22.6305	23.4399	22.8854	22.0645	22.1089	21.892	20.9318	23.0205	22.3421	22.9853	22.0218	0.804854	0.2787	0.15791	0.337867	0.0935536	0.00225479	0.0105216	0.00669146	0.0101531	0.015021	2.08869	1.41023	2.05344	1.08994	+		+		0.02563	0.0718599	0.0291908	0.129889	-0.67846	-0.0352467	-0.998747
DMKJLJHC_00942 Glutamine--fructose-6-phosphate aminotransferase [isomerizing]	MTDETLMYSEIREIPQASRALLEAGADEIAQAGAALRACDPSCIVTVARGSSDHAASYLKYAIELAAGVPVASIGPSVASIYGTKLRLKGMGCIGISQSGRSPDIVELLRAAQAGGALTFSLSNDSASPMAQAADHAVGLRAGPERSVAATKSFVCSIVAGLALLAEWQEDASLKAALAALPEAFARAVDCDWTPLSDRLVRAQSLYVLGRGPGFAISNEMALKFKETCGLHAESYSAAEVLHGPSAIVQAGFPVLALAVEDAARAQLEATAARLVGQGAEVFLTRPGQAEGAVILPTVSDLHPLVAPLVPVVSFYAFIEQLARRRGFHPDTPPHLRKVTETL	K00820	glmS; glucosamine---fructose-6-phosphate aminotransferase (isomerizing) [EC:2.6.1.16]		24.0332	23.8843	24.0854	24.0798	24.1532	24.2272	23.8903	23.7746	23.8523	24.3691	24.1776	24.0939	22.21	21.9168	19.9968	24.001	24.1534	23.8391	24.2135	21.3745	0.0852056	0.0601964	0.0481854	0.115183	0.98156	0.0189236	0.0230733	0.018887	0.0237866	0.00959092	0.152443	-0.161887	0.21255	-2.62642				+	0.107655	0.0794784	0.103884	0.0196059	-0.31433	0.0601067	-2.77886
DMKJLJHC_00946 Multiple sugar-binding protein	MKSIPFAALLLGAALVGTSALAETTLTIESWRNDDLPIWQEKIIPAFEKAHPDIKVVFAPSAPTEYNAALNSKLDAGTAGDLITCRPYDAALALYQKGQLADLSDMKIMSNFPDVAKSAWQTDDGKHTFCVPMASVIHGFIYNKDAFKELGIEPPKTVDEFYADLDKIKADGTYIPLDMGTHDQWEAATMGYQNIGPTYWKGEEGRKALLDGTQKLTDPDWVEPFKQLAKWSNYLGDGYKAQTYPDSQNLFTLGRAAIYPSGSWEIPVFEPQVDFEMGAFPPPVQKAGDTCYISDQPDHAMGLNAASKNKDAAMTFLNWVGSADFAQLYSNALPGFFSLNSAKIELKDPLAQEFLSWRQNCKSTIRSTYQILSRGTPNLENATWAASANVMNGTQTPED…	K10117	msmE; raffinose/stachyose/melibiose transport system substrate-binding protein		27.1114	27.2494	27.1894	27.2175	27.0633	27.0553	26.4399	26.425	26.3214	27.3743	27.2326	27.1038	26.9538	22.144	26.5308	27.1834	27.112	26.3955	27.2369	25.2095	0.056519	0.0746625	0.052698	0.110456	2.17454	0.171798	0.17937	0.1111	0.193402	0.136872	-0.07137	-0.787957	0.0534767	-1.97386		+			0.341764	0.000134415	0.575103	0.2687	-0.716587	0.124847	-1.90249
DMKJLJHC_00950 Maltose/maltodextrin import ATP-binding protein MalK	MGSLTLNNLTKSFGKTEVIKGVDLEVRDGEFCVFVGPSGCGKSTLLRMIAGLEDVSSGDVMIDAARVTQLPPSKREIAMVFQSYALYPHLKVRDNMGLAMKRAGASKPQVEAAVDEAARMLSLEPLLDRRPAELSGGQRQRVAIGRAIVRRPKLFLFDEPLSNLDAALRVATRIEIARLHHELKATMIYVTHDQVEAMTLADRIVVLDGGRVAQVGAPMELYNDPANTFVAGFIGSPQMNFLKAGAIGLQGETVGIRPEHLEISKETGEIPGTISHIEHLGGETNIYIHTEPHGLLTVRLFGEHHFEIDAPVYLTPDPARRFHFDAAGDRMR	K10111	malK; multiple sugar transport system ATP-binding protein [EC:3.6.3.-]		23.2129	23.1877	23.2214	24.0527	23.8631	24.1439	23.8456	23.5305	23.8013	23.9593	23.9872	23.8964	22.1131	21.7866	22.6042	23.2073	24.0199	23.7258	23.9476	22.168	0.0143204	0.116981	0.139259	0.0379572	0.336016	0.0109168	0.0210341	0.017461	0.0197831	0.0166228	0.812583	0.51849	0.740307	-1.03936	+	+	+	+	0.000619657	0.00634982	1.3393e-05	0.0119637	-0.294093	-0.0722767	-1.85195
DMKJLJHC_00958 GMP synthase [glutamine-hydrolyzing]	MTQHQRLLIIDFGSQVTQLIARRLRELNVYCEIHPYQNVTDAFLTEFAPKAIIFSGGPDSVVREGSPRPPKSAYELGVPILGICYGQQVMMQDLGGLVEAGQSHTAEFGRAWVKPTETPIDLLNGWFMDGTGREQAWMSHGDHVSRLAPGFEVFGTSPGAPFAITADLSRRFYAVQFHPEVHHTPNGATLYENFVRDAGFTGDWTMAAYREEMIANIREQVGDSHVICALSGGVDSSVTGILLHEAIGDQLTCVFVDHGLLRLGEAEQVVQMFRDNYNLNLIHADESDLFLGELEGVSDPETKRKIIGRLFIDVFQKYADQIEGAQFLAQGTLYPDVIESVSFSGGPSVTIKSHHNVGGLPEKMGLKLVEPLRGLFKDEVRTLGHELGLPASFIGRHPF…	K01951	guaA; GMP synthase (glutamine-hydrolysing) [EC:6.3.5.2]		26.8992	27.0005	26.7898	26.3934	26.4645	26.2682	26.3961	26.37	26.3699	26.1645	26.4213	26.4261	26.1775	21.2283	22.0896	26.8965	26.3754	26.3787	26.3373	23.1651	0.086019	0.0811297	0.0123155	0.122187	2.1589	0.140813	0.107643	0.109816	0.103672	0.0331799	-0.52112	-0.51779	-0.559167	-3.73138	+	+	+		0.0033756	0.00108585	0.00612011	0.0710283	0.00333	-0.0380467	-3.21026
DMKJLJHC_00967 3-dehydroquinate dehydratase	MSKTIHILNGPNLNLLGKRQPEIYGTDTLDDVRTLCAEIAHEAKFKVELFQSNYEGAIVDQIHEAREKACAIVINAGAYTHTSVAILDALNTFEGPVFEVHISNVYKREAFRHHSFISGRADGVLAGFGIEGYGLAVRRVISLLAKD	K03786	aroQ; 3-dehydroquinate dehydratase II [EC:4.2.1.10]		22.037	22.5339	22.0302	22.4948	22.8047	22.725	23.818	22.8928	22.6711	23.3211	22.6624	23.0544	22.6688	21.7982	21.3094	22.2003	22.6748	23.1273	23.0126	21.9255	0.235855	0.131418	0.496717	0.27056	0.562244	0.00543202	0.00827982	0.0115319	0.0103475	0.0140511	0.474513	0.926977	0.812303	-0.274857			+		0.0678141	0.0756512	0.0328836	0.558446	0.452463	0.33779	-0.74937
DMKJLJHC_00973 Catalase	MAKTTLTTSGGAPVPSNNTSETVGPRGPVLMQDYQLLEKLAHQNRERIPERTVHAKGWGLQGKFTVTKDITKYTCAKLFSKVGNSCEVLSRWSTVAGEQGAADAERDVRGFSLKFYTEDGNWDMVGNNTPVFFVRDAYKFPDFIHTQKRHPKTNLRSPEAMFDFWAAQPECVHQVTILMSDRGIPVNPAHMNGYGSHTYSMWNAQGERVWVKFHFKTQQGHKHYTNAEAETLIGKTRESYQEDLVNMIETGNHPKWTFYIQVMPEKDAETAGFNPFDLTKVWPHGNYPLIEVGELEMNQVPENYWSHVENAAYSPSNKVPGIGYSPDKMLQARVFSYADAHRYRLGTHYEALPANAPKSDVHHYHKDGSMRFFPPQTGHVDAYYEPNQYAEAAVADPSV…	K03781	katE; catalase [EC:1.11.1.6]		26.6295	26.7244	26.6498	26.2639	26.2653	26.2279	26.8785	26.8082	26.902	26.251	26.4329	26.5134	26.1614	21.4732	25.0551	26.6679	26.2524	26.8629	26.3991	24.2299	0.0408096	0.0172992	0.0398371	0.109774	2.0009	0.120181	0.0988468	0.153613	0.10821	0.0694087	-0.415537	0.194993	-0.26879	-2.43799	+	+	+		0.000187045	0.00842822	0.0315011	0.160027	0.61053	0.146747	-2.02246
DMKJLJHC_00976 hypothetical protein	MNTLAQKGKISILRARFFALGAIMTGVLTDGGVFVGGGGADYGVPQELALKYGNRHGLIAGATGTGKTVTLQILAEGFSSAGVPVFMADVKGDLSGIAAAGSEAGKLHGAFTERSNTIGFDLSYRSFPTVFWDMFGEKGHPVRTTVSEMGPLLLSRLMGLSEAQEGVINIAFHLADKEGLALLDLNDLRAMLRHVGEQADQIELEYGNVDTRSIGAIQRQLLVLENQGGDKFFGEPALELSDLIRTDSSGMGQINLLAADKLMSSPQLYATFLLWLLSELFEELPEIGNPDKPKLVFFFDEAHLLFDDAPKALVDKVEQVARLIRSKGVGVYFITQNPADVPDGILSQLGNRVQHALRAFTARDQRDLRRAAENYRANPAFDTELAIKEVGTGEAVTSF…	K06915	uncharacterized protein		26.0087	26.0558	26.0115	25.3922	25.5161	25.6114	24.9615	24.9908	25.1534	25.4677	25.4587	25.3939	23.6034	21.0972	22.0525	26.0254	25.5066	25.0353	25.4401	22.2511	0.0215474	0.0897777	0.0844217	0.0328537	1.03273	0.0769855	0.0589455	0.0432768	0.0556636	0.0176083	-0.518803	-0.990093	-0.58527	-3.77431	+	+	+	+	0.00135796	8.76784e-05	3.00103e-05	0.00666406	-0.47129	-0.0664667	-3.2555
DMKJLJHC_00977 hypothetical protein	MSQLTKPLALALVLGMAHGAYAQDSTDSTTATSPATTADQGSAPAASGSDATTPAADATTPAAPADDKAAPAAPAGNAPQQAPQDETYTKATYGDWALQCIKAKDGKDPCQIYQVIKGPGGGNIADISLFGLPKGGKAEAGATIMVPLDTLLTQNLTVQVDKSDPRVYPFTFCQPMGCFARIGLTSAEVNAYKKGGKATISIVPLAAPDKKVSADISLNGFTDAYNAVVKANEESGALK				26.2248	26.4046	26.3658	25.5023	25.6794	25.5788	25.8271	25.7974	25.8136	25.7479	25.6542	25.5568	24.8431	22.4717	22.695	26.3317	25.5868	25.8127	25.653	23.3366	0.0772666	0.0724931	0.0121545	0.0780211	1.06916	0.0951994	0.0623189	0.0741815	0.0645142	0.0373683	-0.74488	-0.518993	-0.678753	-2.99512	+	+	+	+	0.000574662	0.000718551	0.00094359	0.0167977	0.225887	0.0661267	-2.25024
DMKJLJHC_00980 UDP-3-O-acylglucosamine N-acyltransferase	MSQTIAQIAKALDALAVGDLQISVTSAAEPASAGADQIALAMSPKYAEGLAQGSARAALLWEGADWQGYGLEAAIFVTRPRLAMAGLSKAFDPGPEIAPGIHPSSLVDPSAQIAPGAAIGPFTVIGRDVVIGPNARIASHVTIAEGARIGADALILAHSHIGAGVIVGDRLICQPGAKIGADGFSFVTPETSTVEEARASLGKTNEIHEQSWVRIHSLGSVEIGDDVEIGANSCIDRGSVRATSVGHGTKLDNLVHVAHNVQVGRDCLLCAGVGVAGSSKIGDRVVLAGQVGVSDNVFIGDDVVTGGGTQIFTNVPSGRVIWGSPAVKMDQQIDLNKSVRRLPRLFAQVAELRETVTRLTQKGGTE	K02536	lpxD; UDP-3-O-[3-hydroxymyristoyl] glucosamine N-acyltransferase [EC:2.3.1.191]		25.0274	25.207	24.8836	25.0454	24.976	24.8341	25.1246	25.1219	25.0619	24.9296	24.9037	24.8947	21.5779	21.513	23.5882	25.0393	24.9518	25.1028	24.9093	22.2263	0.132284	0.0879551	0.0289596	0.0147772	0.963329	0.0388676	0.0401291	0.045351	0.03853	0.0173093	-0.0875167	0.0634667	-0.130003	-2.813				+	0.479432	0.543698	0.239351	0.0149601	0.150983	-0.0424867	-2.72548
DMKJLJHC_00983 Lipid-A-disaccharide synthase	MKLFVIAGEASGDKLGAALMAGLSELSPGIDWAGVGGPEMAAQGLESLFAMEELSVMGLMEVLPKYRQLKARIAQTAEAVIAANPAALITIDSPDFCLRVARLARAQRPDLKVIHYVAPSVWAWRPGRAAKMAKVVDHVLALLPFEPPLMEAAGMSCDFVGHPVVAEPRATRAEAEAFRETHMIGADQPLALCLPGSRTGEVKRLGKRFDEALMQLRDREPGLRVVLPTVRGVAGMVREMTARWPVPPIVVEQPEDKRAAFAAADIALAASGTVSLELAASRVPMVIAYDANFVTWHLIWRLLRIDTVTLVNLVSDTRAVPEFLGPECKPRAIAQEMLELLELRDKSEAQRAAMELTMERLGEGGEAPGLRAARSVLEFLAK	K00748	lpxB; lipid-A-disaccharide synthase [EC:2.4.1.182]		21.8277	21.9184	21.8384	22.1483	21.978	22.1161	22.1	22.2367	22.1214	21.8603	20.0047	21.9723	22.091	21.4953	21.413	21.8615	22.0808	22.1527	21.2791	21.6664	0.0404868	0.0738695	0.0600431	0.902309	0.302058	0.00429498	0.00548518	0.0058684	0.00311156	0.0117417	0.21929	0.291217	-0.58243	-0.195063	+	+			0.0211751	0.00472064	0.413389	0.416563	0.0719267	-0.80172	-0.414353
DMKJLJHC_00984 hypothetical protein	MSAQSDIALIAGQGGLPGLVAEAAPGLLVCEMEGTPSEIGTPETLRFRIERLVPFLDSLTDRGIKRVVFAGAIQRPRVDVEMIDPRSAQLVPQLAVAMQTGDDATLRAVIEIFEDFDFEVVGAHDIARDLVPEAGLLLGDPSASERADVERAAAIVADLGRADIGQGAVVSNGLCVAVETLPGTDAMLEFVKHHRALRADLPARSGVFYKAPKPSQDRRADLPTIGVATVRHAAEAGLLGIAFEAGGVMIIERDAVIEAAREAGLFLWARAS	K09949	uncharacterized protein		21.7784	21.8075	21.747	21.7491	21.7446	21.7859	22.4616	22.5741	22.5476	21.7198	21.8533	22.0788	22.4813	21.9383	21.5857	21.7777	21.7599	22.5278	21.884	22.0018	0.0247298	0.0185182	0.0480329	0.148179	0.3684	0.00405249	0.0043912	0.00761076	0.00473226	0.0148139	-0.01779	0.750133	0.106303	0.224097		+			0.461152	3.9669e-05	0.373594	0.439099	0.767923	0.124093	0.241887
DMKJLJHC_00985 Acyl-[acyl-carrier-protein]--UDP-N-acetylglucosamine O-acyltransferase	MSIDPSAQIHASAVIEPGAVIGPDCEIGPFCVIGPDVVLERGVVLQSHVVIQGATEIGAQTQIFPFASIGQIPQDLKFKGEKTRLKIGARNRIREYVTMNTGTEGGGGLTQIGDDGLFMSSCHVGHDCKIGDRVILVNSVALAGHCTLEDDVIVGGVSGIHQWVRIGRGAIIGALSMVTADVIPNGLVAGPRAGLEGLNLVGLKRRGVSRAEIAALRSAFSELSGGNFRESARQMAEGPIEGEHVREMLDFILGPSDRSFLTPQK	K00677	lpxA; UDP-N-acetylglucosamine acyltransferase [EC:2.3.1.129]		22.0519	22.1497	22.269	22.526	22.2512	22.5665	22.6993	22.8934	22.9612	22.419	22.6542	22.3689	21.8961	21.937	21.115	22.1568	22.4479	22.8513	22.4807	21.6494	0.0887878	0.140078	0.110972	0.124366	0.378215	0.0052707	0.00707475	0.00952409	0.00715659	0.0116036	0.291087	0.694487	0.32386	-0.507467		+	+		0.0680535	0.00230006	0.0400493	0.138423	0.4034	0.0327733	-0.798553
DMKJLJHC_00986 3-hydroxyacyl-[acyl-carrier-protein] dehydratase FabZ	MTEPAPYDFADLALIKRIIPHRYPFLLIDKVRDIVPNKGAVGIKNVTANEPHFQGHFPDEPVMPGVTIVEAMAQTSAVVVGISTNSIDKELGTYFMAIDKCKFRRKVVPGDVLEMHVNVLRGGGKVWKFEGRATVNGELAAQAEFTAMMDLKG	K02372	fabZ; 3-hydroxyacyl-[acyl-carrier-protein] dehydratase [EC:4.2.1.59]		25.9118	25.6412	25.8894	24.8961	24.7601	24.9164	24.9107	24.8621	24.7748	25.0237	24.8266	24.9146	23.1053	21.5776	21.6043	25.8141	24.8575	24.8492	24.9216	22.0957	0.122631	0.0693701	0.05622	0.0806395	0.713964	0.0665004	0.0375906	0.0380402	0.0388599	0.015811	-0.95659	-0.964937	-0.892497	-3.71842	+	+	+	+	0.000657611	0.000537551	0.0010047	0.0019124	-0.00834667	0.0640933	-2.76183
DMKJLJHC_00988 Outer membrane protein assembly factor BamA	MSNSFQKMRKICATRSLLRSGAVFPAVAMAWMAMPQIAQAQQYSFSSVKVEGNTRIEPATILNYARIARNKPVSAADLNAAYQRISGSGLFETVALTPEGSTLVIKVQEYPTVSVINFEGNKIIKDAALGQIIQSRPNRVYNPAEVEADAQRLSQAYAQDGRMAARVTPKVIRRDNNRVDIAFEIKEGKVTSVERITFTGNRSYSDRRLRQVLATKQAGIFRTFVKNDTFNPNRVPLDQQKLTQFYQARGFKNVQVTGVSSQMTRQRDAFFMTFNVIEGQKYHFNNVSTVSEIPGLDAAAYDKLARIGNGQTYSPQAIDLAVTRMEQQAIKDGAQFVRVDPRITEDPRTQSVNVTFALVRGPRVFVQRIDIEGNTSTLDRVVRREFRTVEGDPYNPREI…	K07277	SAM50; outer membrane protein insertion porin family		29.0276	28.9705	29.0066	29.1988	28.6946	29.0149	29.0151	29.0378	29.0874	29.0559	29.0488	29.09	28.2073	26.1005	27.76	29.0015	28.9695	29.0468	29.0649	27.3559	0.0235965	0.208314	0.0301772	0.0179659	0.906293	0.6058	0.649961	0.697964	0.68666	0.605946	-0.0320867	0.04521	0.0633367	-1.64563			+		0.839229	0.170433	0.0391557	0.0621735	0.0772967	0.0954233	-1.61354
DMKJLJHC_00990 Regulator of sigma-E protease RseP	MDLLPQFGNLLYTIVAFVVALSIIVAVHEYGHYIVGRWSGIKAEVFSLGFGPKLISRVDKHGTRWQIAAIPLGGYVKFLGDANAASAGADDAEMAQLTPEERRHTMHGAPLWARAATVVAGPVFNFILSIIIITGLSMWTGQATDTPDIDAVVALPQGAGGLQHGDRIIAVNGIKTPDYAALDQAGGDLPAGPDLTYTVERDGQQQQVSGPQLVPARFDGIAPNSAAYDAGLAPGDVITAIDGTPVWRFSALQEAVKTGKGAPIALSIWRPEAGGRGKQFNVTLVPRKTDLPGPAGGFETRFLIGATGSYMFTPVTMPVGPWQALKGGVQSTYGIIAQSISGIKAMIEQQISSCNLSGALRIAETSAAAAKSGPSSFIWFIAVLSTAVGFLNLFPIPVL…	K11749	rseP; regulator of sigma E protease [EC:3.4.24.-]		22.4413	22.0779	22.2627	21.8448	21.9088	22.052	21.5755	20.9758	20.1015	21.8844	21.9437	21.8078	22.0371	22.6128	21.5406	22.2606	21.9352	20.8843	21.8786	22.0635	0.148381	0.0866463	0.605196	0.0556281	0.438088	0.00566388	0.00495866	0.00243603	0.0047148	0.0154619	-0.32544	-1.37636	-0.382013	-0.197123		+	+		0.0553135	0.0353985	0.0270461	0.579204	-1.05092	-0.0565733	0.128317
DMKJLJHC_00993 Ditrans,polycis-undecaprenyl-diphosphate synthase ((2E,6E)-farnesyl-diphosphate specific)	MALRKDKTDRKIATSEITDYGVPHVAIIMDGNGRWAKKRGWPRLAGHRKGAEQIKKIVREAPDLGIRYMTIYAFSTENWKRSLIEVLGLMKMFRFMIRREADALAAEGVHLRFIGDRSRLDPALRETMDQIEDRTRGNTRLTLAVAINYGGRDELRRAAAQLAIDHAAGKIGADELDDAALAARLDTAGMPDPDLVIRTSGETRISNFLSWQAAYAEYEFTETLWPDFTVEELTEILSRFGNRDRRYGGVKT	K00806	uppS; undecaprenyl diphosphate synthase [EC:2.5.1.31]		23.3849	23.3288	23.2864	22.1855	22.5679	22.4605	22.7589	22.4384	22.902	22.1895	22.3985	22.5239	21.8781	20.9043	22.0544	23.3334	22.4046	22.6998	22.3706	21.6123	0.0403469	0.161043	0.193832	0.137915	0.505778	0.0119138	0.00686554	0.00857439	0.00663081	0.0113092	-0.928783	-0.633623	-0.96279	-1.72112	+	+	+	+	0.00138096	0.01061	0.000692083	0.00866586	0.29516	-0.0340067	-0.792333
DMKJLJHC_00994 Ribosome-recycling factor	MSDEIEIDTDDLEHRMKGAMTALKHEFASLRTGRASASMVEPVMVDAYGAMTPINQVGTVNVPEPRMVTVNVWDKGLVNKVEKAIRESGLGINPQTNGTIIMLPIPELNEERRRELTKVAAQYAEHARVAIRNVRRDGMDQIKKAKAAGMSEDDVKFWEQSVQELTDTHTGHVDKALEEKQAEIMQV	K02838	frr; ribosome recycling factor		25.2532	25.07	25.2007	22.6273	22.4639	22.4806	22.7845	23.0451	22.6793	22.7056	22.4462	22.4971	21.4171	22.2535	22.0107	25.1747	22.5239	22.8363	22.5496	21.8938	0.077039	0.0733972	0.15379	0.112215	0.351324	0.0426894	0.0074575	0.00942553	0.00750689	0.0137459	-2.65071	-2.33833	-2.62501	-3.28086	+	+	+	+	3.87409e-06	4.31373e-05	1.07474e-05	0.000208241	0.31238	0.0257033	-0.630143
DMKJLJHC_00995 Uridylate kinase	MSDETHPQPKYKRVLLKISGEALMGNQGYGLHPPTVARIAQEVKSVQEMGVEICMVIGGGNIFRGLAGSAQGMERTTADYMGMLATVMNALGMQAQLEALGLHTRVISAIPMDEVCEPYIRRRAVRHLEKKRICIFAAGTGNPYFTTDTAATLRANEMNCEAIFKGTKVDGVYDKDPMKFDDATRYDTVSYDEVLQKNLGVMDASAIALARDNNKPIVVFSLDEPGGFRGILAGQGTYTLVKG	K09903	pyrH; uridylate kinase [EC:2.7.4.22]		24.5416	24.4917	24.5837	24.1	24.2686	24.1959	23.9007	24.1342	24.1592	24.1095	24.2007	24.1399	23.7242	21.5933	21.5023	24.539	24.1882	24.0647	24.15	22.2732	0.0376194	0.069041	0.116418	0.0379074	1.02667	0.0274767	0.0236365	0.0220841	0.0227628	0.0178812	-0.35079	-0.4743	-0.388947	-2.26574	+	+	+	+	0.00322631	0.00538969	0.000501277	0.035564	-0.12351	-0.0381567	-1.91495
DMKJLJHC_00999 Acetaldehyde dehydrogenase 2	MANDMASEFKGIMTSPFRERYGNFIGGKFVEPKSGKYFDNTTPLTGTKICEIARSNHEDVELALDAAHAAKEKWGHQMSATERANALLKIADRMEQNAELLAVCETWDNGKPIRETRAADIPLAIDHFRYFASVLRGQEGTMSEIDGDTVAYHFHEPLGVVGQIIPWNFPLLMAAWKLAPALAAGNCVVLKPAEQTPATILVFAEMIADLLPDGVLNVINGFGLEAGKPLAQSPRISKIAFTGETTTGRLIMQYATENLIPVTLELGGKSPNIFFSDVCREDDAFFDKAIEGFVLFALNQGEVCTCPSRALIQEDIYDEFMERALQRTQAIIQGDPRDGATMIGAQASAEQQEKILSYMDIGRKEGAEILTGGEAADLGGELSNGYYIKPTIFKGHNKM…	K00138	aldB; aldehyde dehydrogenase [EC:1.2.1.-]		29.2089	29.1993	29.0745	30.1925	30.016	30.0254	31.3331	31.2871	31.2893	29.9927	30.1951	30.1615	29.5613	28.3253	29.8427	29.1609	30.0779	31.3032	30.1164	29.2431	0.0611977	0.0810829	0.0211876	0.0885614	0.659058	0.676546	1.40145	3.33485	1.42325	2.24144	0.91706	2.14226	0.955513	0.0821867	+	+	+		0.000216904	1.24896e-06	0.000231754	0.869138	1.2252	0.0384533	-0.834873
DMKJLJHC_01000 Peptidyl-prolyl cis-trans isomerase A	MRKIARRTVFAAAFALAAPAAFAQDAAKDGPGPNLVLEIGGSVTGKVVIDLDTADAPKSAERLEKLATEGKYDGVVFHRVIDGFMAQTGDVQFGKRGGDTSMAGMGGSSLPDLPAEFSNKPFVRGTVGMARSSDPNSGNSQFFIMFASAPHLDGQYTVVGHVISGMDVVDKIKKGDSAQNGAVQDPDYIVKATVEK			K01802	24.8436	24.5545	24.6352	24.9705	24.9733	25.0423	24.9108	25.2339	25.0326	25.1564	25.2264	24.9769	24.1921	21.3742	22.1989	24.6778	24.9954	25.0591	25.1199	22.5884	0.121818	0.0331949	0.133229	0.105082	1.18291	0.0302516	0.0413595	0.0439984	0.0445851	0.0222471	0.317607	0.381337	0.44213	-2.08937	+	+	+		0.0236399	0.0404443	0.0177421	0.0678627	0.06373	0.124523	-2.40698
DMKJLJHC_01001 Peptidyl-prolyl cis-trans isomerase B	MAEIKDPENTIIIELKDGRVVIELLADVAPKHAERMKQLARDGAYDNVAFHRVIDGFMAQTGDVANANMEKDYNPGRAGTGGSKYPDLPAEFSKLPHDRGTLGAARSANPNSANSQFFINFGDNHFLNGQYTVYGRVIEGMEHVDKIARGEPPKSPDRMVSVKVAADA			K01802	24.9191	24.7154	24.714	22.9879	22.8757	23.272	22.5358	23.0516	22.7849	22.9251	22.2313	22.4092	22.1742	20.7309	22.6845	24.7828	23.0452	22.7908	22.5219	21.8632	0.0963733	0.166767	0.210607	0.294219	0.827298	0.0325364	0.0107032	0.00913268	0.00736367	0.0134576	-1.73761	-1.99205	-2.26098	-2.91962	+	+	+	+	0.000217481	0.000262182	0.000495961	0.00772053	-0.254433	-0.523363	-1.182
DMKJLJHC_01002 Phosphoglycerate kinase	MAWKTLDEVDLAGKVVLVRVDINVPVENGEVTDDTRIRKIVPTIHDILEKGGKPVLLAHFGRPKGEVVPEMSLKPLVPALQAALGVPVKFAEDTVGGPAKRAVAALGDGEVLLMENTRFHPGEETNDAQFAASMGALGQIYVNDAFSAAHRAHASTEAITHVLPSVAGRLMEAELKALEAALGDPQRPVVAIVGGAKVSTKLDLLGNLVSKVNHLVIGGGMANTFLVAKGVDVGKSLAERDMAETAREILDKAKTANCEIHLPIDVVCAREFKAGAENETVPADACPSDAMILDAGPDTVAAIAKVFEDSRTLIWNGPLGAFEIAPFDAATNAAAAKAAELTRAGSLISVAGGGDTVSALNKADAAKDFTYISTAGGAFLEWMEGKELPGVAALNQG	K00927	PGK; phosphoglycerate kinase [EC:2.7.2.3]		27.8459	27.7677	27.6557	27.2623	27.3391	27.3471	27.301	27.4074	27.4309	27.4057	27.7097	27.5165	24.5462	22.237	21.6424	27.7565	27.3162	27.3797	27.5439	22.8085	0.0780909	0.0382118	0.0565246	0.125633	1.25247	0.255576	0.20663	0.21979	0.239274	0.0259142	-0.440303	-0.376727	-0.212507	-4.94792	+	+		+	0.00201141	0.0052361	0.112004	0.00507015	0.0635767	0.227797	-4.50762
DMKJLJHC_01003 Fructose-bisphosphate aldolase class 1	MSNAQQTEKMREGDGFIAALDQSGGSTPKALRLYEIEEDAYGSESEMFDLIHEMRSRIIKAPAFSSGKVVGAILFEQTMDRAIDGTPTATYLWETCGVVPFLKIDKGLEAEEHGVQMLKPIPGLDDLLSRAAKAGIFGTKERSVISAANPGGIKAIVAQQFELGAQVLDHGLMPILEPEVTISISDKAEAEEMLLAEILSHLDSLPEDRQVMLKLTLPETANHYKPLVDHPRVLKVVALSGGYSRDEANARLAQNTGMIASFSRALTEGLSAQQSDEAFNAKIGEAITEIHAASVAG	K01623	ALDO; fructose-bisphosphate aldolase, class I [EC:4.1.2.13]		24.1262	24.2336	24.1496	25.4078	25.6538	25.6293	24.9435	25.1201	25.0788	25.1343	25.3704	25.4032	26.1338	21.2458	24.9352	24.1698	25.5636	25.0475	25.3026	24.1049	0.0461104	0.110602	0.0754334	0.119765	2.08011	0.0212729	0.0613238	0.043645	0.0506042	0.0636491	1.39383	0.8777	1.13282	-0.0648533	+	+	+		7.99584e-05	0.000149338	0.000236843	0.966952	-0.516133	-0.26101	-1.45869
DMKJLJHC_01004 Thermostable carboxypeptidase 1	MSAFDELVAHQRETEALGNIAGLLSWDQEVMMPRGAADQRSEEMAAIESVLHARRTDPRIADWLARAEARDEAGGRMLDLIAHSYNRSTRIPARLATELARLTSLSQGIWAEARANEDATAFLPTLEEVVRLKREEAAAVSEGNLYDALLDDYEAGATAKELGAMFDRMRGPLVALRDRVLGSDVRPEPLDMVFPENAQLRLARICASAFGYDWTRGRLDMSVHPFSSGGGDDARITTRISESEPFGNIYSTIHEVGHATYEQAIDPAYRFTPLGRGVSMGVHESQSRICENQLGRSAPFTSWLHGRMTDAYGDLGIDEVAFHALVNRVEMGFIRTESDELNYNLHIMLRFDLERDLISGKLEVADLEEAWNTRFEQDFGVKVSKPSQGFLQDVHWSLG…	K01299	E3.4.17.19; carboxypeptidase Taq [EC:3.4.17.19]		26.4979	26.6741	26.4527	26.3236	26.1707	26.2114	26.27	26.3626	26.3606	26.3868	26.4014	26.2438	26.345	21.4118	25.2003	26.5416	26.2352	26.3311	26.344	24.319	0.0955316	0.0646794	0.0432069	0.0711091	2.10818	0.110103	0.0976801	0.106251	0.104154	0.0738304	-0.306313	-0.21047	-0.197547	-2.22254	+	+			0.0198628	0.0469216	0.0788706	0.210621	0.0958433	0.108767	-1.91623
DMKJLJHC_01005 Heme A synthase	MSQKRNIFEEVGETSASTRAAPQGGMIDAKPRGARRSIRIWLFILFALVVAMIAVGGATRLTDSGLSITEWKPISGAIPPMNMMDWQAEFANYKQSPQFEYLNPNMTLSEFKGIFWWEWGHRQLGRTIGLVWFAGFVFFWLTKKIPPGWWGRLFSLGILGGLQGAIGWWMVASGLTGRMTSVASYRLATHLGLAFIILGLIAWFAFQLGRPQAQLLQARRLSEKRLTHLGTVMIGLVFVQILLGALTAGIDAGLAFPTWPSMNGQFLPSESFDFTPLWRNFFENPALVQFNHRMVAYLVFFIGLYSAWRARSSAHQSTRQAFAMMGAMIVVQLLLGITTALDLVHYWWLGSIHQLGAVVTWVLVIRARHMARFPMVRSIREGRA	K02259	COX15; cytochrome c oxidase assembly protein subunit 15		23.308	23.4819	23.5939	21.1959	20.9277	21.4136	21.5101	20.344	20.4072	21.2511	22.0612	21.9478	21.5801	22.2252	21.5406	23.4612	21.1791	20.7538	21.7533	21.782	0.11762	0.198723	0.535436	0.358165	0.313844	0.0130177	0.00293597	0.00222535	0.00432265	0.0127209	-2.28216	-2.70747	-1.7079	-1.67925	+	+	+	+	0.000152016	0.00221037	0.00304857	0.00209441	-0.425307	0.57426	0.60291
DMKJLJHC_01006 hypothetical protein	MADSELGERVTRRARGGGGAARRAERTAVRFEFARYIERNIPNLGILNEEALQIIETNAETVLAEIGVNFVENPDALELWREAGAEIDGERVRIPRGLARKLCATAPSQFTQVARNPERNVEIGGRNLVLAPVYGPPFVRDSANGRRYATISDFRNFVKLGQMSKWLHHSGGTVCEPTDVAVNKRHLDMLHAHMTLSDKPYMGSVTEPSRAADSVEMSKILFGDQFVDENTVMTSLININSPLTFDGTMMGALEIYARAGQACIISPFIVGGAMAPVTVAGTLTQVLAEVLAGVAYSQLVRPGAPVIFGAFVTSIDMNSGAPTFGTPEAAQITLGAGQLARRLGLPYRSAGGFTGSKLPDAQAAYESANTLNTGLLAGVNFMLHSCGWLEGGLVSSYEK…	K14083	mttB; trimethylamine---corrinoid protein Co-methyltransferase [EC:2.1.1.250]		23.211	23.2627	23.1065	25.4096	25.2255	25.0323	25.3397	25.6123	25.6436	24.8579	25.2326	25.3658	22.779	20.6115	23.2334	23.1934	25.2225	25.5318	25.1521	22.208	0.0649563	0.154018	0.136491	0.215003	1.144	0.010812	0.0484095	0.0610578	0.0455918	0.0170904	2.02906	2.33845	1.95873	-0.98542	+	+	+		6.75508e-05	2.58284e-05	0.000248338	0.290763	0.309383	-0.0703367	-3.01448
DMKJLJHC_01007 Maltose/maltodextrin import ATP-binding protein MalK	MADLKLRDIAKSYGEVNVLKDIDLDIKAGELIVFVGPSGCGKSTLLRMIAGLEKITGGDLEIDGVRVNDVPPANRGIAMVFQSYALYPHMTVRDNMAFALKIAKQSKDEINAAVEKAAKMLQLTEYLDRLPKALSGGQRQRVAIGRAIVRDPKVFLFDEPLSNLDAALRVATRIEIAQLKESMPDRTMIYVTHDQVEAMTLASRIVVLANKGIAQVGTPLDLYERPENEFVAQFIGSPAMNLIPGEITATGALSEVTLENGVKAHSSVPTREEDLGRKVNIGVRPEDFKPAGAADSCFTGKVAITEKLGEVTLLYFEPQGGREAVIAKLPGVHNGLRGTSVTLSADPDKIHLFADGRSLLYR	K10235	aglK; alpha-glucoside transport system ATP-binding protein		26.6007	26.6213	26.5838	26.7175	26.9175	26.7763	27.2457	27.1223	27.2589	26.8589	26.8398	26.6374	26.1729	22.408	24.2997	26.6019	26.8038	27.209	26.7787	24.2935	0.0153407	0.0839323	0.0615324	0.100201	1.53699	0.114809	0.144862	0.195256	0.140776	0.0725385	0.201847	0.607033	0.176753	-2.30839	+	+			0.0286864	0.000172345	0.0692497	0.100899	0.405187	-0.0250933	-2.51024
DMKJLJHC_01008 Oligo-1,6-glucosidase 1	MMKTLTKQEDWWRGAVIYQIYPRSFQDSNGDGVGDLLGIVRRLPHVASLGADAVWISPFFTSPMKDFGYDVSDYCDVDPMFGNLADFDQVIATAHALGLKVMIDLVLSHTSDQHPWFRESRTSRDNPKADWYVWADPKPDGTPPNNWLSIFGGSGWHWDARREQYYMHNFLVSQPDLNFHNPEVTQELLNVAQFWLERGVDGFRLDTVNFYMHDEQLRDNPPLPPEERNDQTAPKVNPYNHQNHIYDKNNPENLRFLRRLRTLMNNYNAAAVGEVGDSQRGLEILGEYTSGVDKIQMSYAFELLSGHEPLSAAFIHEVFTKVASAVTEGWICWAYSNHDVERHISRWGLTPAAARLYTTLMMCIRGSICLYQGEELGLPEAELSFEDLQDPYGKEFWPE…	K01187	malZ; alpha-glucosidase [EC:3.2.1.20]		23.5504	23.3454	23.3828	23.7339	23.7989	23.4712	23.56	23.7025	23.7148	23.4974	23.6007	23.6272	21.8702	21.9979	21.5862	23.4262	23.668	23.6591	23.5751	21.8181	0.0891198	0.141643	0.070264	0.0560034	0.172039	0.0127054	0.0164811	0.016672	0.0152812	0.0130432	0.241767	0.232883	0.148897	-1.60812		+		+	0.110551	0.044027	0.11604	0.000301346	-0.00888333	-0.09287	-1.84989
DMKJLJHC_01009 Trehalose transport system permease protein SugB	MSAIAGQKSRLTWAVNISVVLLVVAWLVPTVGLLVSSFRTTDQISQSGWWDAAFPVEKAFRDRVSADGETQSNGLYVLSGDLLTNGQNAADLKPGTKIKAFGTSGIKPGAYKAGTSADLGDGGTLTINSDGTYTASSPTSFDGSGPRVYFEAELPPAFTLANYREVLFSDGMGQAFLNTLTVTIPATIIPILVAAFAAYALAWMQFPGRGLLIAAVVGLLVVPLQLALVPLLRLHLEIGIGQSFLGIWLAHTGFGLPLAIYLLRNYMVGLPRDIIESAKVDGATDFQIFMKIVLPLSFPALASFAIFQFLWVWNDLLVAKVFLPANDGSKVMTVKIADDLLGSRGGDWGILAAAAFVSIAVPLLVFFSMQRYLVRGLLAGSVKGG	K10234	aglG; alpha-glucoside transport system permease protein		24.0061	23.7456	23.948	24.2557	24.2684	24.2282	22.3284	22.7999	21.7001	24.338	23.9795	24.2735	22.8662	22.2063	22.9295	23.8999	24.2508	22.2761	24.197	22.6673	0.111638	0.0167771	0.45052	0.156024	0.327036	0.0176432	0.024684	0.00639255	0.0235163	0.0234978	0.350863	-1.62375	0.297133	-1.23257	+	+		+	0.0117338	0.00777542	0.0936604	0.00726048	-1.97461	-0.05373	-1.58343
DMKJLJHC_01010 Lactose transport system permease protein LacF	MSPILQGLFTIVLGVGGCITYFYASNLILDKVIFPPKGSNPGRNINRANMVRPWLFLFPAIFALGLYLAYPVVGSFWRSLFNRSGDDFIGLGNYERLAADPQFRQAVFNNFLWVLVVPALATFFGLLAAQLTDRLKWGNLAKSLIFMPMAISFVGASLIWKFVYANNPTIGLINAVRAYFSLNPVDPLQIPFWNNFFLMVILIWIQTGFAMVILSGALRGIPEETVEAAVLDGANPWQLFFKIKVPQIMSTIVVVWTTITILVLKVFDIVYATTGGNFGTQILPSYMMQYMFRDDGRATAVAFVIMIIVLPVMIWNIIQARKEVR	K10233	aglF; alpha-glucoside transport system permease protein		22.5007	22.328	22.249	22.7108	22.9856	21.2718	19.7085	21.1191	20.6153	23.0353	22.4569	22.6029	22.2222	21.6374	21.6647	22.3592	22.3227	20.4809	22.6984	21.8414	0.10512	0.751576	0.583657	0.245606	0.269495	0.00606444	0.00648667	0.00184191	0.0083222	0.0132557	-0.0364933	-1.87827	0.339173	-0.517807		+			0.949044	0.0109981	0.147016	0.0645615	-1.84178	0.375667	-0.481313
DMKJLJHC_01011 hypothetical protein	MTKYLMLGIAALAVSAGMASAQDLKFKPGEESNRFDWSSYDQFAKNNDLSGQTLTITGPWTGDDKKLFESVLAYFEKATGAKVNYSGSESFENDIVIAAKGGTPPNIAVFPQPGLAADMARQGYLTPMPEGTGAWIKDNYSAGQSWEDLSTYKGKDGKDHTYTFPFKADLKSLVWYVPENFKEAGYKVPQTMEELKALTEQIVKDGGTPWCIGLGSGAATGWPATDWVEDFMLRTQSPQDYDDWVTNKLKFNDPKVVAAIKDYGWFATNPKFVEGGPQAVATTDFRDSPKGLFDFPPKCYMHKQASFIPTFFPEGTKVGTDVNFFYFPAYASKDLGKPVLGAGTMFGITKDSKAAETFIKFLETPIASEVWMAQSGFLTPNKNANPAAFANDTQRHMNK…	K10232	aglE; alpha-glucoside transport system substrate-binding protein		29.6041	29.6625	29.4748	29.8641	29.798	29.8707	29.808	29.9024	29.698	29.9271	29.8967	29.863	29.3403	27.9272	28.8407	29.5805	29.8442	29.8028	29.8956	28.7027	0.0784712	0.0328377	0.0835225	0.0261767	0.585081	0.904908	1.19186	1.17875	1.22125	1.54123	0.263777	0.222317	0.315093	-0.877743	+		+		0.0118257	0.051723	0.00574242	0.103328	-0.04146	0.0513167	-1.14152
DMKJLJHC_01013 1,4-beta-D-glucan glucohydrolase	MLPKRSEFPKDFLFGVATSSYQIEGHAKGGAGPTHWDSFAATPGNVVRAENGDLACDHYTRWAEDLDLIANAGFDIYRFSTSWARVMPEGRGPVNAEGLDFYDRLIDGMLERGIKPALTLYHWELPAALADLGGWRNRDIAGWFGDFTQVIADRLGDRIWSAAPINEPWCVGWLSHFLGHHAPGLRDIRATAHAMHHVLLAHGTATQVMRASGMTNLGAVCNFEYPLPADDSPETATATQLYDAYYNRFFAEGLFLGRYPDEVMEGFAPHMPKGWQDDFTTIQAPLDWFGLNYYTCKRIAPDSSAWPSHTEVTGPLPKTEMGWEIYPEGLSSFLTRIARDYTGDLPLFVTENGMASADAVIGGKVTDAARIAYYSAHLAEVQKAIAEGVPVKGYIGWSL…	K05350	bglB; beta-glucosidase [EC:3.2.1.21]		24.6427	24.5192	24.5343	24.4237	24.5578	24.5505	23.8257	24.1312	24.0664	24.5317	24.5432	24.4795	21.8829	22.6496	21.3268	24.5654	24.5107	24.0078	24.5181	21.9531	0.0549825	0.0615579	0.131432	0.0276921	0.542302	0.0279847	0.0295574	0.0212299	0.0293783	0.0143225	-0.05472	-0.557643	-0.0473067	-2.61233		+		+	0.401541	0.00520609	0.33826	0.00247337	-0.502923	0.00741333	-2.55761
DMKJLJHC_01014 Glucokinase	MSVVDRYTLLADIGGTNTRVALAQGRQMLPGTIRRYANKGRDSLEEILSDYIAEESVRDLAGACVAAAGPVRDEIATMTNLSWVIEARNLKSVTGAEQVFVLNDLQAQGHALGHLAADAVREILPGQPARADAARLVVGVGTGFNAAPVHEAPGGRLVPPSEAGHITLPCQTDEEFSLKRYLEAKHEFASVEHVVSGRGLERLYAYLAGHEDATVTGQQILEEIKRNDPTARAAGEMFVRFMGRVLGDLALTHLPFGGIYLIGGAARGVVPWLSEFGFAPAMHAKGRFSDFLKAFPVSVIEDDYAALHGCAAFCAARVAVE	K00845	glk; glucokinase [EC:2.7.1.2]		24.5179	24.8577	24.6663	24.6889	24.7623	24.9299	24.9699	24.6806	24.8398	24.9592	24.9012	24.953	22.2774	21.3813	22.5309	24.6806	24.7937	24.8301	24.9378	22.0632	0.139094	0.100878	0.118285	0.0259845	0.493172	0.0303114	0.0359628	0.0375399	0.0392977	0.0154586	0.113047	0.149467	0.257167	-2.61743				+	0.404811	0.311415	0.0619631	0.00194773	0.03642	0.14412	-2.73047
DMKJLJHC_01026 (R)-citramalate synthase	MTKSRLYLYDTTLRDGQQSAGVQFSVPEKIAIAEALDAIGTDYIEGGWPGANPTDSDFFEARPKTRATFTAFGMTKRAGRSAENDEVLAGVMNARTPAVCLVGKTHDYHVTAALGITLDENLENIRASVAHMVAQGREALFDAEHFFDGYKANPDYALACCRAAFEAGARWIVLCDTNGGTLPGEIARIVEEVIAAGLPGDHLGIHTHDDTGNAVAGSLAAIEAGVRQVQGTLNGLGERCGNANLISLIPTLLLKEPFASQLETGISHDSLAQITKLSRKLDDILNRVPLRSAPYVGASAFTHKAGLHASAILKNPDTYEHIDPAIVGNSRLIPMSNQAGQSNLRARLEGMGIEVPRDTPALARILDQIKEREDQGYAYDGAQASFELLARRELGLLPD…	K01649	leuA; 2-isopropylmalate synthase [EC:2.3.3.13]		20.748	21.1904	20.8191	20.8001	20.3953	21.3236	23.3815	23.2361	23.1529	21.1226	21.1193	20.8849	22.2196	21.8593	21.4843	20.9192	20.8397	23.2569	21.0423	21.8544	0.19396	0.380012	0.0944752	0.111248	0.300213	0.00223508	0.00232048	0.0126153	0.00264053	0.0133758	-0.0795033	2.33768	0.123083	0.935243		+		+	0.805162	0.000105801	0.479771	0.0208261	2.41718	0.202587	1.01475
DMKJLJHC_01027 Cysteine--tRNA ligase	MTQIRLRNSLSRKVEDFTPIDAQNVRMYLCGPTVYDRAHLGNARPVVVFDVLYRLLRQLYGPDHVTYVRNFTDVDDKINATALARKEAGAEGSLEELIHARTEETIGWYHADMDALGALRPDHEPRATEYIGAMVAMIEGLVAQGHAYAAEGHVLFRVRSYQGYGRLSGRTVDDMIAGARVEVAPYKEDPMDFVLWKPSDESEPGWASPWGRGRPGWHIECSAMSYELLGASFDIHGGGIDLQFPHHENEIAQSCCAHPEGSFANFWVHNEMLQVEGKKMSKSLGNFFTVRDLLDQGVPGEVIRFVFLQTHYSKPMDWTAEKAAGASAKLDDFVRMADQYCDFDEAKNRVPHQAILDALGDDLNTHAALVSIDKFAGQSDLVTDMAVGLDFLGLIPLEE…	K01883	CARS; cysteinyl-tRNA synthetase [EC:6.1.1.16]		23.1145	23.2847	23.1156	23.2704	23.3978	23.2259	24.5802	24.5098	24.5946	23.5268	23.2678	23.37	21.0588	23.026	21.9396	23.1716	23.298	24.5615	23.3882	22.0081	0.0800104	0.0728613	0.0370703	0.106511	0.804556	0.0106498	0.0127531	0.0311637	0.0134245	0.0148796	0.126423	1.38994	0.216627	-1.16347		+			0.173843	2.39773e-05	0.082965	0.111569	1.26352	0.0902033	-1.28989
DMKJLJHC_01029 Gamma-glutamyl-hercynylcysteine sulfoxide hydrolase	MCRWAAYVGEPIFLEDIVSRPNHSLIHQSQFATMCHTAINADGFGVAWYGERPEPGLYRDVMPAWSDPNLRSLTETVKSGLFLAHVRASTGSATSRNNCHPFRHGRWSFMHNGQVGGYEGFRRAGEMMIPDSLYPERRGATDSEALFLVAMAEGMAADPKAALERATARFETLSRERGGAPHMRLTAAFSDGVRLYAVRYASDDQAPSLYHRWSDTRRGRAVVSEPLEVDEQDWHEIPPGSFCIFEGKRVTVEPFTPGR				20.0997	20.3281	20.3371	20.0784	19.4089	19.338	19.8491	19.8613	19.7616	20.108	19.4497	19.7023	21.2954	21.4396	21.9765	20.255	19.6084	19.824	19.7533	21.5705	0.10985	0.333551	0.0443943	0.27119	0.293047	0.00141041	0.000988404	0.0011682	0.00108065	0.0109865	-0.646543	-0.430927	-0.501633	1.31556		+		+	0.0598154	0.00677439	0.0724036	0.00401618	0.215617	0.14491	1.9621
DMKJLJHC_01030 hypothetical protein	MAGAYWIAHVTVTDPEAYGKYAEGAGPAIAKHGGKFLARSTRYVQLEGTDRARNVLAWFPSLEAAEQCYHSDEYQAALAHAKGAAERDLMILEASEDV				21.051	21.0046	20.5759	20.7054	20.9177	20.1006	20.1785	19.9671	19.7533	19.8931	19.3601	20.3528	21.2625	21.9041	21.5688	20.8772	20.5746	19.9663	19.8686	21.5785	0.213864	0.346185	0.173564	0.405637	0.262058	0.00217092	0.00193096	0.00128928	0.00117058	0.011047	-0.302587	-0.910843	-1.0085	0.701303		+	+	+	0.352308	0.00947046	0.0358635	0.0427227	-0.608257	-0.705917	1.00389
DMKJLJHC_01031 Alanine--tRNA ligase	MPSLNDIRSTFLGYFERNGHRVVDSSPLVPRNDPTLMFTNSGMVQFKNCFTGVEKRDYQRATTAQKCVRAGGKHNDLDNVGYTARHHTFFEMLGNFSFGDYFKEGAIPFAWELLTKDFDIPKDRLLVTVYHTDDEAAEMWKKVAGLSDERIIRIPTSDNFWQMGPTGPCGPCTEIFFDHGDKIWGGPPGSAEEDGDRFIEIWNLVFMQNEQFEDGSMRALDMQSIDTGMGLERIGALLQGKHDNYDTDLMRNLIEASAHATSSDPDGPGNVHHRVIADHLRSTSFLIADGVMPSSDGRGYVLRRIMRRAMRHAHLLGAKDPVMYRLVPALIREMGAAYPELGRAQALIEETLRSEETRFKTTLDRGLKLLDEALIDLPEGDKLPGGTAFKLYDTYGFPL…	K01872	AARS; alanyl-tRNA synthetase [EC:6.1.1.7]		28.374	28.2594	28.3017	28.261	27.8386	28.1266	28.0481	27.9922	28.0572	28.124	28.231	28.2116	27.1377	23.0205	27.1634	28.3117	28.0754	28.0325	28.1889	25.7738	0.047305	0.176191	0.0287336	0.0465801	1.94696	0.375547	0.349749	0.345553	0.374142	0.202388	-0.236273	-0.27919	-0.122827	-2.53785		+			0.140965	0.00204193	0.0590186	0.139134	-0.0429167	0.113447	-2.30158
DMKJLJHC_01032 Protein RecA	MAVAKILDMDKHSKADKQKALDSALAQIERQFGKGSIMKLGGDTPAREIESTSTGSLGLDIALGIGGLPKGRIVEIYGPESSGKTTLTLHAIAEEQKKGGVCAFVDAEHALDPGYARKLGVDLEELLISQPDTGEQALEIVDTLVRSGAVSMVVVDSVAALTPKAEIEGDMGDHTVGAQARLMSQAMRKLTASIGRSNCMVVFINQIRMKIGVMFGSPETTSGGNALKFYASVRLDIRRIGSIKDRDEVVGNQTRVKVVKNKVAPPFKQVEFDIMYGEGISKMGELVDLGVKAGVVDKSGAWYSYGDERIGQGRENAKTFLREHPDLAYEIEDKIRASHGLDFGELSADDALTEE	K03553	recA; recombination protein RecA		24.5806	24.3819	24.6728	25.0827	25.3158	25.2145	24.8927	24.9901	24.9716	25.1151	25.1237	25.085	24.1689	21.8716	23.6886	24.5451	25.2044	24.9515	25.108	23.243	0.121382	0.0954466	0.0422534	0.0165995	0.989383	0.0275938	0.0478055	0.0408346	0.044217	0.0350212	0.659237	0.40635	0.56284	-1.30209	+	+	+		0.00379445	0.0110646	0.00289477	0.138414	-0.252887	-0.0963967	-1.96133
DMKJLJHC_01036 Putative aldehyde dehydrogenase AldA	MSIQTILETMEYGVAPEDDSHARAWLDAHKDGFGHFINGEMTRPAHLFEVRDPARDTVLARVSQGQTADVDAAVAAARKAQPDWAKLSGHQRAKHLYALARHVQQHARLLAVLETLDSGKPIRESRDIDIPLVARHFYHHAGWAEILEDELPGQGPQGVCGQIIPWNFPLLMLAWKVAPALAAGNTVVLKPAEYTPLTALAFAEIAAECGLPKGVLNIVTGDGETGSAIVGHEGIDKLAFTGSTEVGRLIRERTAGSGKALTLELGGKSPFIVFDDADLDAAVEGVVDAIWFNQGQVCCAGSRILVAESVAARFETLLRARMTTLRTGDPMDKSTDIGAIVHPSQLARIRDLVARGAAQGATLHQGEAPQGCFFPPTLATDVAPASILSTEEIFGPVVT…	K00128	ALDH; aldehyde dehydrogenase (NAD+) [EC:1.2.1.3]		25.3809	25.4015	25.3154	25.4145	25.1038	25.3893	24.9797	24.8595	24.9006	25.2423	25.4442	25.42	21.094	21.5327	23.052	25.3659	25.3025	24.9133	25.3688	21.8929	0.0367204	0.140922	0.0498891	0.0900321	0.838943	0.0487415	0.0511723	0.0397677	0.0529806	0.0137371	-0.0633833	-0.452653	0.00289667	-3.47305		+		+	0.571505	0.000494818	0.968413	0.00426202	-0.38927	0.06628	-3.40966
DMKJLJHC_01037 Deoxyribose-phosphate aldolase	MKTQTHVQTSEGALVPTAAGHAEAGRNPGMSLDVAMFEGHRVNRSAAERRCATLTARRSVKKAHQAAWLVNAVRCVDLTTLAGDDTGARVQRLCAKARQPIAPHIVQGLGLDPEGLRVGAVCVYPTMVPHAVRALEGTGIPVASVATGFPAGLMPLHLRLEEIRWAVAQGAGEIDIVISRELALTHNWQALHDEIAAMREACGEAHMKAILATGELETLNTVYAASMVAMQAGADFIKTSTGKESVNATLPVSLTMLRALRDYGMSTGHRIGFKPAGGMKQAKEALAWQILMKEELGRDWLNPDLFRFGASSMLGDIERQLEHYVTGRYAASSRHALA	K01619	deoC; deoxyribose-phosphate aldolase [EC:4.1.2.4]		22.435	22.866	23.2872	22.9458	22.6455	23.0388	23.1785	22.7409	22.6996	23.1523	23.1119	23.017	20.4143	21.6728	21.7552	22.8627	22.8767	22.873	23.0938	21.2808	0.347888	0.167839	0.216679	0.0567337	0.613603	0.00859716	0.00952308	0.00966811	0.0109459	0.00898739	0.01397	0.0102733	0.231043	-1.58194				+	0.96166	0.97342	0.406406	0.0338026	-0.00369667	0.217073	-1.59591
DMKJLJHC_01038 Ribokinase	MSDTIAVVGSNMMDLVTYIDRMPARGETLAAPDFAMGFGGKGANQAVAAARLGSKVAMVTCVGDDGFGAQVRANLESNGIDTTHVRTVEGSASGVAPIFVEPDGENAILIVKGANAALAPSDVDGAAEMLRGASAILLQLEVDLATVYHAVAFGAREGITTILNPAPAHRDLDIAQLDGLDWFCPNESELALLTGLPTDTEADVTAAARHLIARGIRNVVVTLGGRGARRITADHVEEIAPVAVTPVDTTGAGDAFIGAFAHYLGAGHAPTEALTRAARYAALSITRRGTQTSYATAPEFAEFLSEHALD	K00852	rbsK; ribokinase [EC:2.7.1.15]		22.1627	21.742	22.2944	19.4855	21.4108	20.4663	20.0485	20.2931	19.6482	19.6749	21.7831	19.5608	22.1127	21.3493	21.7562	22.0663	20.4542	19.9966	20.3396	21.7394	0.235572	0.786063	0.26586	1.0218	0.311858	0.00495018	0.00177636	0.00131665	0.00162244	0.0123507	-1.61215	-2.06971	-1.72673	-0.326943	+	+			0.0499022	0.00118283	0.0803586	0.302305	-0.457557	-0.11458	1.28521
DMKJLJHC_01047 Inosine-5-monophosphate dehydrogenase	MQIREALTFDDVLLVPAASSVLPSTADVATQVTRSIHLNIPLLSSAMDTVTESRMAIAMAQAGGMGVIHRNLTLEQQAAEVSRVKRFESGIVYNPITLRPEQTMADAKALMERYNVTGFPVVDADKRVVGIVTNRDMRFASDDKTPVSAMMTKDGLAILTEPADRDRARALMKERRIEKLLVTDGAGKLTGLLTLKDTEKAVLHPLACKDDKGRLRVAAASTVGDEGYERSCALIEAGCDLIVIDTAHGHSEGVAKAVARVKSYNSNVQVVAGNVATAEATRALIGAGADAVKVGIGPGSICTTRIVAGVGVPQLTAIMDCAGAAGDTPIIADGGIKFSGDFAKAIAAGAWCAMVGSAIAGTDESPGEVVLYQGRSYKSYRGMGSLGAMARGSADRYFQ…	K00088	IMPDH; IMP dehydrogenase [EC:1.1.1.205]		28.2039	28.2058	28.037	28.0374	27.8842	27.8437	28.2048	28.2181	28.2893	27.8162	28.1698	28.0836	27.4532	23.6003	27.4343	28.1489	27.9217	28.2374	28.0232	26.1626	0.0791246	0.083414	0.0371049	0.150545	1.81184	0.335474	0.314409	0.398283	0.333561	0.264973	-0.227157	0.0884933	-0.125667	-1.98633	+				0.0491042	0.225402	0.355027	0.196321	0.31565	0.10149	-1.75918
DMKJLJHC_01050 hypothetical protein	MKQILTTAAVVALSTGMAQAGGVERSTQSVGILFEQGNYAEFNIGGFNPDVSGTVAGGAISSGDMATGYGSFSLGYKQALNDNIDLAIILDQPLGANVHYPLANQPYPFAGSTASISSHAVTGLMRYKFPQNFSVYGGVRIQQASGKADLRVFSPGAGYLPYKLDAPNETDFGYVVGVAWEKPEIAARVALTYNSKITHDFDGTETLFNGATIDSTFETVSPESVNLEFQTGIAKDTLLLGSVRWVHWSQFEIAPDGYRATLGGGQPGSAGALVAFKNNTTTFNIGVGRRFTDQWSGAVMFGYEKHDGDTVGNLGPTDGFKSISLAASYQATDQIKITGGLRYVDIGDATTNAPTLANFSGNKGWGAGLRVGMSF				27.625	27.6444	27.5318	27.9371	28.2872	28.3662	28.4626	28.3501	28.4241	28.5469	28.1645	28.0176	27.3449	23.9183	25.574	27.6004	28.1968	28.4123	28.243	25.6124	0.0491368	0.186488	0.0466772	0.223088	1.39917	0.229378	0.380456	0.449611	0.388448	0.180957	0.596407	0.811853	0.64258	-1.98805	+	+	+		0.0119351	7.11849e-05	0.0164267	0.115036	0.215447	0.0461733	-2.58446
DMKJLJHC_01052 hypothetical protein	MQTRPGMIYSNRTDWLEASDKRVLLFGMSGLGKTWAANLLRDEGWFHYSVDYRIGTRYMGENIADNFKREAMKNPFLAELLLSDSVYIASNITFDNLAPLSTYLGKPGDPAKGGLPFDDYMRRQEQHRRAEMAALLDTIPFIERARAIYGIEQFLCDSGGSICEVVDPDDLQDPILSALSAHHLMVWIEGSEAHTEALVERFSRAPKPMYYQPEFLIRKWEEYRDLKGQSEAEVDPDAFVRWTYAQALAHRQPRYKAMARNWGISIRAEDLYLVRDAKGFTSLIAEALPA				21.9607	21.5628	21.5035	20.6437	19.5371	18.8506	21.5216	21.6478	21.5828	21.4169	21.1257	20.9635	22.2897	21.6781	22.8144	21.6757	19.6771	21.5841	21.1687	22.2607	0.203017	0.738682	0.0515282	0.187589	0.46437	0.00377594	0.00103661	0.00395675	0.00288238	0.0177269	-1.99856	-0.09162	-0.50699	0.585057	+				0.0210288	0.569663	0.0604358	0.177899	1.90694	1.49157	2.58361
DMKJLJHC_01053 Homoserine O-succinyltransferase	MPITLPENLPAFDILSQEGVMVMSPSRAQSQEIRPIRIALLNLMPKKIQTENQFARLIGATPLQIDFQLIRMSDHVTRNTAAEHMEEFYRPFSEVLASGEKFDGLIITGAPIEQIDFETVDYWDELTQVFDWTQSHVFSTFGVCWGGMAMAYYFHGTPKHLLDHKAFGCFRHRNEMPASPYLRGFSDDLLIPVSRWTEMKRPELEAAGLTTLIHSDETGPCLIEDRARRALYIFNHLEYDSGTLKEEYDRDVASGKPINVPANYYPDDDPRQMPLNRWKSHAHLLYGNWINEIYQGTPYDMAEIGR	K00651	metA; homoserine O-succinyltransferase/O-acetyltransferase [EC:2.3.1.46 2.3.1.31]		22.9753	22.7872	22.8316	22.5768	22.4226	22.5207	22.894	22.9471	22.7202	22.7053	22.5587	22.8161	22.3058	21.7845	21.4056	22.8647	22.5067	22.8538	22.6934	21.832	0.0802635	0.0637299	0.096905	0.105404	0.369034	0.00860893	0.00736895	0.0095403	0.00829324	0.0131692	-0.357973	-0.0109	-0.171317	-1.03272	+			+	0.00781888	0.908406	0.141436	0.0180367	0.347073	0.186657	-0.674747
DMKJLJHC_01055 hypothetical protein	MAQDRQETRDDIPFVGDITRYLETEAPKAIRDAIQHSDKDDILAKSYPYDEMLKRKKYDRQMEKLQVELVKMLWDMKETGKRLVVLFEGRDAAGKGGTIGRMRENLNPRSAYVVALPKPSETEASQWYFQRYVDWLPAAGEIAMFDRSWYNRGVVEHVFDFCTPQQREHFFTQLPDFEKMLVDDGITLVKLWLNVDRAEQLRRFIARETDPLKQWKLSWIDVEGLKRWDAYSAAIEDTLERSNTDFAPWTVIRSDDKKRARIAAIQTVLSAVDYAKKDREAIGSIDTSICGGIDILNV	K22468	ppk2; polyphosphate kinase [EC:2.7.4.1]		23.3191	23.1823	23.3399	23.2961	23.5637	23.6959	23.6064	23.6518	23.655	23.3574	23.4886	23.3423	22.0629	21.6393	21.6184	23.2804	23.5186	23.6377	23.3961	21.7736	0.0699084	0.166307	0.0222244	0.0656906	0.204801	0.011484	0.0148599	0.016427	0.0134982	0.0126466	0.238197	0.357343	0.115717	-1.50685		+		+	0.135257	0.00232714	0.163218	0.000596469	0.119147	-0.12248	-1.74505
DMKJLJHC_01057 hypothetical protein	MKRILVSSSILAMVGGAAFAGGYTAPAAAPVVTPAPMVAAPVAFDWTGAYAGAQVGYGKTNGDLDANGAVGGVHAGYLKDFGGFVGGGELAYNAANVDDGDNGKLKNMTDLKLIGGVPYNRSLFYGALGASYMKADLAGQDHSDTSPMVGIGMKYAVTDQWTVGGELDYRDGHNFDGTDSDVNATTLNLTTSFKF			K16079	26.9197	26.6188	26.9316	25.6867	24.8648	25.4331	25.6724	23.2086	25.4678	24.6421	24.4908	21.7083	22.2817	24.5908	26.6106	26.8233	25.3282	24.783	23.6137	24.4944	0.144736	0.34368	1.11634	1.34876	1.76861	0.133852	0.0520912	0.036333	0.0156957	0.0833725	-1.49513	-2.04039	-3.20961	-2.32898	+		+		0.00477223	0.0624146	0.0286708	0.13702	-0.545263	-1.71449	-0.83385
DMKJLJHC_01061 Delta(1)-pyrroline-2-carboxylate reductase	MLTPRMITYDDAKPLVTWPEAVTALRDGHALPKAKVGDIFLGPSEGSLLSRGAYIEGLGFGVKSVTVFGKNPGAGLPSVQGAMFMFEPEHGQLAAIIDSKLVTELKTASDSVLGAQLLARPESASLLIVGAGTVARSLIDAYSSAFPSIKTIRIWARRIAQAEALAQDVSVPGVDIAAVGDLARAAGDADIVTCATMAREPVLMGDWIRPGTHVDLIGAFKADMREADDALISTASLFVDSRDTTIHHIGELTIPIKAGVISADAVKGDFYDLIGKGAEGRRSEDEVTLFKNGGGAHLDLMIAKYIAGKVAQTK			K01750	20.562	21.0227	20.3411	19.821	18.7402	21.0335	20.9223	20.7525	20.6871	20.4835	19.3495	20.4259	21.3167	22.1352	21.8551	20.6419	19.8649	20.7873	20.0863	21.769	0.283939	0.936742	0.0991187	0.521516	0.33966	0.00184434	0.0011807	0.00227767	0.00136119	0.012607	-0.777053	0.145357	-0.55565	1.12707				+	0.3244	0.531814	0.256291	0.0227502	0.92241	0.221403	1.90413
DMKJLJHC_01064 hypothetical protein	MEPFLGMVMPVAFNYAPKNWALCNGQLMQISQNQALFALLGNRFGGDGRSTFALPDLRGRAARGAQSLRPGVMSGVETVTLTEAEMPSHTHAFNAAQDQISGRVPTPPDGKLVAGGTIPSGTVYGAPNAPVTLSDANISSAMGGTAHNNMQPFLTVNYIIALSGIFPSRS				22.5187	22.3161	22.3482	19.0111	20.4409	20.5188	20.1768	20.2231	19.1292	20.5449	19.3025	20.1647	21.6664	20.849	21.794	22.3943	19.9903	19.843	20.004	21.4365	0.0888965	0.693095	0.50512	0.519781	0.418673	0.00621375	0.00128792	0.0011837	0.00128575	0.0100117	-2.40402	-2.55126	-2.39027	-0.95783	+	+	+	+	0.00824712	0.00215174	0.00304272	0.0340254	-0.147243	0.0137533	1.44619
DMKJLJHC_01065 hypothetical protein	MEPFIGQIALFAFNRIPRGWMRCDGTLLAISQYDALFAVIGTTYGGNGSQTFALPDLRGRIPLHQGQGQGLRDYYIGEHGGAETVTLISSQAAPHRHALQAASANPPVDATSTPSEAVMLASSSNAPRYSAAPSDPAILAMQSIGFSGGSQPHDNMMPTVVMNYCIATMGLYPQHG				23.2446	23.5142	23.4814	21.0354	20.8828	21.195	20.685	20.9635	19.909	21.8909	20.8712	21.6489	21.0913	21.5111	21.2217	23.4134	21.0377	20.5192	21.4703	21.2747	0.120112	0.127482	0.446219	0.435043	0.175417	0.012593	0.00266197	0.00189136	0.00355268	0.00894964	-2.37566	-2.89423	-1.94306	-2.1387	+	+	+	+	4.35309e-05	0.000897178	0.0036792	0.000141761	-0.518573	0.432593	0.236953
DMKJLJHC_01068 Outer membrane protein W	MKQSILSLTLLAATTLSAAPALAQQAGDITLGVGVHQVMPRSDNGTLTGGLQVDIGNATRPTFTAEYFVRDNLGIELLAALPFKHSVNIDGLGQVGTVKHLPPVISLQYHFPTGTNLTPFVGAGVNYTAFFSEKTSGALAGNNLSLKNSWGLALHAGLDYKVSEHGSLRTDIRWIDINSDVKLNGTKIGKVKIDPVVVGVAYIYKF	K07275	ompW; outer membrane protein		19.6565	21.0733	19.7738	20.3881	21.175	20.5315	21.5259	21.3707	18.5408	19.8559	20.9027	20.6349	22.3275	20.7695	21.3325	20.1678	20.6982	20.4791	20.4645	21.4765	0.642026	0.342221	1.3721	0.444011	0.644158	0.00132775	0.00210376	0.0018396	0.00176916	0.0102934	0.530393	0.31131	0.296667	1.30868					0.360799	0.785784	0.619451	0.111578	-0.219083	-0.233727	0.77829
DMKJLJHC_01070 Acyl-CoA dehydrogenase	MFAHSMEFDLGEDIASLREMVRRWATERVAPIAASTDLDNSFPNALWPEMGELGLLGITVPEAYGGADMGYLAHVVATEEIARASASIALSYGAHSNLCVNQLKLNGSEAQKRKYLPGLVSGQQIGALAMSETGAGSDVVGMKLRAEKRDGHYRLNGHKYWITNGPDADTLIVYAKTDPEAGSRGITAFIVEKGMAGFSTSPHFDKLGMRGSNTAQLFFDDCDIPFENVLGEEGRGTRVLMSGLDYERVVLSGIGTGIMMACLDEVVPYAREREQFGQPIGNFQLMQAKIADMYVAMNTARAYVYEVARACDRGGVTRQDAAAAVLYASEQAMVQAHQAVQALGGAGFLNDSKVSRLFRDAKLMEIGAGTSEIRRMLIGREVLSAS	K00253	IVD; isovaleryl-CoA dehydrogenase [EC:1.3.8.4]		23.9419	23.9471	23.9246	26.8145	26.8624	26.8529	27.7102	27.7684	27.6877	26.8418	27.2908	27.2043	26.3177	22.6259	24.1108	23.9379	26.8433	27.7221	27.1123	24.3515	0.00960716	0.0207369	0.0340384	0.194499	1.51676	0.0181138	0.148882	0.278657	0.177403	0.0755105	2.90541	3.78423	3.17445	0.41361	+	+	+		5.74169e-09	1.14421e-08	2.09784e-05	0.719396	0.87882	0.269047	-2.4918
DMKJLJHC_01071 dTDP-3-amino-3,4,6-trideoxy-alpha-D-glucose transaminase	MTERFEGNFTQQEPISEEAIAAAVEVMRSGRLHRYNTAPGEAGEVALLEQAFAAFTGARYCLAVASGGYAMGCALRALGVGPGARVLTNAFTLAPVPGAIAALGAEPVFVETTENLTIDHEDLTAKARAGDVLMLSHMRGHICDMDALMEIAQAHELRVIEDCAHTMGAAWAGVPSGRHGVVGCYSTQTYKHMNSGEGGLIVTDDAALAARMILLSGSYMLYERHLAAPPPEAFAQLKYDTPNVSGRMDNLRAAILRPQLATLPERVARWNALYAAMEAGLADVPGVALTARAQAEAYVGSSFQFRLPGRAADEMQEIVARCAARGVELKWFGAAEPAGFTSRHDSWRYAPPQTMPRTDAVLAGLLDLRLPLTFSQADAAQIARIIRDVLTT				21.3653	20.9858	21.6755	19.9813	21.2687	21.4681	21.5159	21.3929	21.5031	21.1589	21.3635	20.4923	22.2649	20.763	22.0655	21.3422	20.906	21.4706	21.0049	21.6978	0.282051	0.658926	0.0552074	0.371981	0.666003	0.00299668	0.0024297	0.00365753	0.00257305	0.0119995	-0.436183	0.128407	-0.3373	0.355557					0.437973	0.561799	0.364629	0.525187	0.56459	0.0988833	0.79174
DMKJLJHC_01073 Phosphoglycolate phosphatase, chromosomal	MRTVVFDLDGTLADTSGDLIAAANACFVARGHAPVLDAQDDALIAFQGGRAMLRVGYARVGLEGAALEALVEADYKPLLGYYGAEIDRYTRLYPGAVDAVKTLRNQGFATSICTNKPEGLARDLVARLGVAELFDALIGADTLPVRKPAPEPYIAAVEQAGGTLARSLLLGDTVTDRETARVVGVPSVLVSFGPEGRGIERLAPEALLDRYEDLPALALRLLGAAD	K01091	gph; phosphoglycolate phosphatase [EC:3.1.3.18]		23.6192	23.8304	22.9857	19.3471	22.9728	22.1809	22.7453	20.9838	23.0708	22.9456	18.9747	19.8389	21.5391	22.37	21.5839	23.4784	21.5003	22.2666	20.5864	21.831	0.358893	1.55648	0.916753	1.70512	0.381556	0.0131737	0.00366804	0.00635056	0.00192518	0.0131602	-1.97817	-1.2118	-2.89201	-1.64745				+	0.154762	0.156705	0.0787576	0.0112659	0.766373	-0.913833	0.33072
DMKJLJHC_01074 Bifunctional protein GlmU	MEIALITLAAGQGSRMKSDLPKVLHEIGRAPLLAHALASARALEPARVIVVAGHGAEPVRKSVAKFAPDAEVVLQDAQLGTGHAVAQALPALAGFEGRVIVLYGDTPFIRPETLELMTQADADVVVLGFEAADPGRYGRLVTDGAALKRIVEFKDATDDERAITLCNSGVISCDAAVLQDLVAGLSNDNAAQEYYLTDIVAGARAKGLSAQVVTCDEAETLGINTREELARAEAQFQARARAEALEDGVTMIDPASVYFALDTYLGRDVVIGPNVVFGPEVTIESGARIEAFCHLEGCHISRGATVGPFARLRPGAELAEDVHIGNFVEVKNAVLAEGVKVGHLTYLGDAEIGEHTNIGAGTITCNYDGVFKHRTVIGANAFIGSDTMLVAPVTIGAGA…	K04042	glmU; bifunctional UDP-N-acetylglucosamine pyrophosphorylase / Glucosamine-1-phosphate N-acetyltransferase [EC:2.7.7.23 2.3.1.157]		26.1335	26.151	26.0933	25.5574	25.5295	25.5505	26.2834	26.2613	26.2951	25.6984	25.4678	25.5442	23.5965	22.2996	22.4597	26.1259	25.5458	26.2799	25.5701	22.7853	0.0241518	0.0118395	0.0140198	0.0958926	0.57735	0.0825432	0.06057	0.10255	0.0609137	0.0254995	-0.580143	0.154	-0.5558	-3.34066	+	+	+	+	6.88185e-06	0.00145842	0.00135672	0.00121876	0.734143	0.0243433	-2.76052
DMKJLJHC_01075 Glutamine--fructose-6-phosphate aminotransferase [isomerizing]	MCGIIGVLGKNEVAPLLVESLKRLEYRGYDSSGIATVNGGVLDRRRAVGKLVNLSDLLVHEPLAGKSGIGHTRWATHGAPTATNAHPHKAGPVAVVHNGIIENYQALRAELAEAGLVAQTQTDTETVALLTRMFMERGMDARTAAVETLGKLEGAFALLWLFDGEEDLMIAARKGSPLAIGYGDGEMFVGSDAIALAPMTDRLTYLEEGDYAFITRAGAEIFDAEGRHANRREQRIELGQAQIEKAGYKHFMGKEIAEQPVVLADALRHYLPQTGLNMPEELDFSNIDRITLVACGTAFYACSVAKYWFESFARIPVEIDVASEFRYREPPLSERGMTIFVSQSGETADTLAALRYCHEKVAKTVAVVNVPTSSIAREVDIALPIMAGVEIGVASTKAF…	K00820	glmS; glucosamine---fructose-6-phosphate aminotransferase (isomerizing) [EC:2.6.1.16]		25.6848	25.843	25.7566	25.191	25.2009	25.2587	25.9213	25.9098	25.9373	25.0807	25.202	25.3477	23.1851	21.4864	22.8693	25.7615	25.2169	25.9228	25.2101	22.5136	0.0646839	0.0298633	0.0113136	0.109137	0.737683	0.0641173	0.0482221	0.0800627	0.0474621	0.0211227	-0.544617	0.161317	-0.551353	-3.2479	+	+	+	+	0.000415302	0.0254861	0.00355417	0.00343616	0.705933	-0.00673667	-2.70328
DMKJLJHC_01076 hypothetical protein	MSRKRGKSRITRPEPSDFTPLPPEEEARLRAEAEAYAASDAQYESFAEPDEEEEPLGPPPGIEEALFALQAWEDPAKAAQAAAHHRAERRYLGVPVPAIEDMVTLWRGQLDVPGRVELAAQLWDSDIHEARIAAAKLLTQARLRPDTEAWTLITSWVPQFDALALADHACKAGAKRLEADPARLDLIEEWIGSSHMWTRRAAFVITLPFTKARTPKPEESAARERILGWATARAEDPHGFVQSAIGGWLHALSKKDPERVRIWLAQEGERLKPFAREEAAKAL				22.0056	22.0966	21.4982	21.3182	21.4834	20.1469	21.5047	21.2229	21.5745	21.3663	20.8526	21.1848	22.0029	21.391	22.1491	21.8668	20.9828	21.434	21.1346	21.8477	0.263266	0.59494	0.15195	0.21272	0.328371	0.00431073	0.00256251	0.00356591	0.00281499	0.0133136	-0.883973	-0.43276	-0.732217	-0.0190767			+		0.127046	0.114354	0.0376795	0.951965	0.451213	0.151757	0.864897
DMKJLJHC_01077 hypothetical protein	MKRSRVNEIMAEAEEMILEFGFRLPPFAWWSPAEFRARLPQAQRVVEAQMGWDITDYGQGDFDTLGLFLFTLRNGDLRDLQAGHGMAYAEKLLISKKDQISPMHTHIIKAEDIINRGGANLAVELYGSDDQGQFDETAGGIVMCDGVPRHFEPGEVLMLRPGESVTLRPGDWHAFWGAGGDVLIGEVSTVNDDRTDNIFRDPIGRFSQIEEDVAPRHLLVSDYDNFLA	K09988	lyxA; D-lyxose ketol-isomerase [EC:5.3.1.15]		22.3794	22.1672	22.366	22.3083	22.8376	22.8409	22.5003	23.0822	22.713	22.9366	22.2657	22.68	22.5163	22.485	21.8375	22.3042	22.6623	22.7652	22.6274	22.2796	0.0970461	0.250289	0.240389	0.276423	0.312843	0.00583749	0.00820788	0.00897191	0.00792268	0.0179602	0.358063	0.460967	0.323223	-0.0245967					0.132308	0.0657277	0.193709	0.920538	0.102903	-0.03484	-0.38266
DMKJLJHC_01087 DNA-binding transcriptional activator DecR	MDEDDRRILTELQRDATLSLERIATRVALAKTTVWNRVQKLTQNGTILRQAAILDPRKVGLSETFFVSIRTGQHESDWLERFKAVIEDMPEITEAHRLAGTLDYLLKVQVASTQDFDRFYKDLVSRIPIHDVSSSLSMEQMKHSLELPLSKGRPTPPA	K05800	ybaO; Lrp/AsnC family transcriptional regulator		22.0049	22.1109	21.9906	20.5565	20.8278	20.4768	20.7017	20.5393	20.5594	20.6483	20.5074	20.3832	21.9319	21.9717	21.6894	22.0355	20.6204	20.6001	20.5129	21.8643	0.053671	0.150235	0.0722727	0.108274	0.124761	0.00484553	0.00199325	0.00200053	0.00182958	0.013468	-1.41513	-1.43537	-1.52256	-0.17117	+	+	+		0.000232347	2.2906e-05	5.82992e-05	0.149274	-0.0202433	-0.10743	1.24396
DMKJLJHC_01088 Aminopeptidase T	MSKDLDPKSLQKLAQVAVRVGLNLQPGQDLVLTAPVSALPLVREIAAEAYKAGAGLVTPILGDEEITLARYRHANNDSFDRAPGWLYEGMAKAYEGNAARMAIVGDDPMMLADQDPEKAARAGKANSIAYKPALEKISNFAINWSIVSYPSVAWATRMFPDLPEDEAVEKLANAIFAASRVDQPDPVAAWEAHNAELRKRTQWLNAERFSALHFTSPGTDLTVGLADDHEWQGGASPAQNGVVCNPNIPTEEVFTTPHAARVDGTVRATKPLSHQGSLIENIEMRFEGGRAVEATATRGQEVLQKLIATDEGASRLGEVALVPHGSPISKSGLLFFNTLYDENAACHIAMGQCYSKCFVDGADLSSEQVSEKGGNSSLIHVDWMIGGPDTDIDGIRADG…	K19689	ampS; aminopeptidase [EC:3.4.11.-]		26.6381	26.6484	26.3278	26.1939	25.8244	25.7227	25.9286	26.197	25.9474	25.9822	26.0466	25.9918	25.787	21.5307	23.6952	26.5381	25.9137	26.0243	26.0069	23.671	0.148769	0.202452	0.122324	0.0283731	1.73772	0.10984	0.0781645	0.0859005	0.0824512	0.0471144	-0.624417	-0.513767	-0.53121	-2.86714	+	+	+		0.0245635	0.0195634	0.00770429	0.0807044	0.11065	0.0932067	-2.24273
DMKJLJHC_01092 D-xylose-binding periplasmic protein	MFKILMAATAITAGMAATAYAQTVGVSWSNFQEERWKTDEAAIKSALDAAGVDYVSADAQSSSSKQLSDVESLMAQGVDALIILAQDTQAIIPAVQAAANEGVPVIAYDRLIEDDRAFYLTFDNVEVGRMQARAVLAAQPKGNYVMIKGSPTDPNADFLRGGQQEVLQPSIDSGDITIVGEAYTDGWLPANAQRNMEQILTANDNKVDAVVASNDGTAGGAVAALAAQGMDGIPVSGQDGDHAALNRIARGTQTVSVWKDARELGKRAGEIAVQLAGGTKMADIEGAQEWTSPAGTKMTAQFLQPVPVTADNLDVVVDAGWIGKDELCQGVTDGPAPCN	K10543	xylF; D-xylose transport system substrate-binding protein		26.2469	26.2884	26.195	26.9728	27.1508	27.0883	26.7747	27.129	26.9785	27.4365	27.252	27.3758	27.3916	25.0984	27.3164	26.2434	27.0706	26.9607	27.3547	26.6021	0.0382179	0.0737502	0.145191	0.0767939	1.06375	0.0895489	0.174296	0.164388	0.209865	0.359348	0.827193	0.717257	1.11129	0.358657	+	+	+		0.000147525	0.00250282	5.22046e-05	0.658573	-0.109937	0.2841	-0.468537
DMKJLJHC_01094 Ribose import ATP-binding protein RbsA	MAARTDTPLVEMRDVSVAFGGVKAVDHVSIDLYPGEVVGLLGHNGAGKSTLIKCLSGANKMDTGEILINGEKVEIHNPRDARRYNIETIYQTLALADNLDAASNLFLGRELITATGLMDDSRMEAETRKVMGRLNANFKKFKSPVKALSGGQRQSVAIARAVYFDARILIMDEPTAALGPEETRMVAELIEELKAQGIGIFLIEHDIHSVMDLCDRASVMKNGKLVGTVNVADVTDEDILGMIILGKTPAPAS	K10545	xylG; D-xylose transport system ATP-binding protein [EC:3.6.3.17]		19.7112	20.6394	18.9712	20.9365	19.9406	20.4225	20.8803	20.8854	21.0296	21.2552	21.3925	21.101	21.7119	21.0355	21.0081	19.7739	20.4332	20.9318	21.2496	21.2518	0.682503	0.406682	0.0692052	0.119068	0.325524	0.00101051	0.00175072	0.00251753	0.00304857	0.00880896	0.65927	1.15783	1.47564	1.47792			+		0.30569	0.0754214	0.0394659	0.0506368	0.49856	0.816367	0.818647
DMKJLJHC_01095 Xylose isomerase	MTDFFADIPKLAFEGPETDTEFAYRHYNPDEVVAGKRMEDHLRFAVAYWHSFAWEGADPFGGRTFERPWFGEGMDLAKHKADVAFEMFDRLGVPFFCFHDADVRPEGADFAETTRNLEEIVEYFAAKMEQTGTKLLWGTANLFSHRRFMAGAATNPDPEVFAWSAATVKTCMDATHKLGGENYVLWGGREGYETLLNTDLTREAEQAGAFLQMVVDYKHKIGFKGTILIEPKPQEPTKHQYDYDVGTIYGFLQRFGLEGEVKLNIEQGHAILAGHSFEHELALAGSLGLLGSIDMNRNDYQSGWDTDQFPDSTPEVARAYYEVLKAGGFTTGGTNFDARLRRQSLDPQDLILAHAGAMDVCARGFKAAAKLFEEGKLEAARAARYAGWEDPANAAMLRS…	K01805	xylA; xylose isomerase [EC:5.3.1.5]		24.1632	24.1983	24.274	25.2619	25.4624	25.4306	25.8488	25.7275	25.7703	25.5356	25.5398	25.5131	25.0191	21.952	25.6675	24.2119	25.385	25.7822	25.5295	24.2129	0.0462489	0.088003	0.0502171	0.0117162	1.62044	0.0219023	0.0541814	0.0726295	0.059222	0.0685938	1.17312	1.57038	1.31764	0.00102	+	+	+		7.55468e-05	5.32415e-06	2.56712e-06	0.999333	0.397257	0.144517	-1.1721
DMKJLJHC_01096 hypothetical protein	MQDPSQSVHVFDARDIWVTSGANQGDALDLAENCEPGDVYQLDREAVALRLAVGWDSAGGQIVAAGSEIGAPGDAITLLARHLMMAPDGDSVDILIIRHEPSATLFALPLSPIAPRLDYTLLAASADPGEARLADMVCVAFTTGTMITLAGGAQIPIEQLKPGDRVLTRDRGPQPVQLVARARMRAVGSFAPVVISAGVLGNQSDLIVSPHHRVFLYRRGAQKLGETSELLVQAKHLIDEENVWQREGGFVDYFALIFERHEIVYAEGIPVESLMVSAASLSLLPEDLRAEISNRLPNLKHRPHFGTEATRELLEKLGHEAIFRKRDG				21.5138	21.4172	21.7108	21.5206	22.0639	21.8333	21.6022	21.845	21.7819	21.7049	21.7714	21.4878	22.6269	22.3134	20.7314	21.5473	21.806	21.743	21.6547	21.8906	0.122172	0.222649	0.102846	0.121087	0.829566	0.00345442	0.00453375	0.00441772	0.004037	0.0137154	0.258663	0.195757	0.10742	0.3433					0.223188	0.158027	0.42703	0.59363	-0.0629067	-0.151243	0.0846367
DMKJLJHC_01097 3-oxoacyl-[acyl-carrier-protein] reductase FabG	MDLGIKGKRAVVCASSKGLGRGCAVALAEAGVDLVLNARGAETLEATAKHIADTYGVKVTTVAADITTEAGRAEVLKAAGAVDILVNNAGGPPPGHWSDWDREDFIKALDANMLAPIAMMQALMPGMIERGWGRIVNITSQSVRAPIAQLGLSNSARAGLTGFVAGTSRQVAPKGVLINNLLPGMHDTDRMVALDKAASESSGISVEEASKQRRGNIPVGHYGDPGDFGAMCAFLCSEKARFIVGQNIMLDGGQNNITI	K00059	fabG; 3-oxoacyl-[acyl-carrier protein] reductase [EC:1.1.1.100]		24.4115	24.4312	24.5077	24.2835	24.5261	24.1865	25.0479	25.1283	25.0489	24.3908	24.5269	24.4013	24.3048	21.1724	24.2985	24.4501	24.332	25.075	24.4397	23.2586	0.0415095	0.142823	0.0376959	0.0618211	1.47517	0.0258356	0.0261149	0.0444859	0.0278238	0.0354003	-0.118087	0.62489	-0.01046	-1.19158		+			0.324352	9.46851e-05	0.852221	0.317215	0.742977	0.107627	-1.07349
DMKJLJHC_01098 Fe(3+) ions import ATP-binding protein FbpC	MSPAPVPPRLEVRHLTRRFAAQAVVDDISFEIPAGQVTCLLGPSGCGKSTTLRMIAGVDVQDAGEIHVDGTLICGPGLTVPPEQRAIGLMFQDFALFPHLTVAENVAFGLSGTAREKNARVAELLERVHLSRHRGSYPHALSGGEQQRVALARALAPRPRILLMDEPFSGLDERLRDDIRDETLALLKEEGTAVLLVTHEPHEAMRMADEILLMRAGSIVQRGAPYNLYNAPVDRRAAAFFSDLNVIESTVEGALASTPFGEFLAPGHADGTRIDIVIRPQHLKIDFDRAGRGPNPTQEEGTPARGIVTRARYLGRESLVEFRLETGQVLKASVPNVFLPKAGTPMWLMIRRDRCFVFPAQG	K02010	afuC; iron(III) transport system ATP-binding protein [EC:3.6.3.30]		20.5961	20.5793	20.7162	20.9337	20.9068	20.8589	20.9029	20.4054	20.6818	20.6281	20.9513	20.9051	21.9991	21.2468	21.9279	20.6306	20.8998	20.6634	20.8282	21.7246	0.0609737	0.0309664	0.203544	0.142719	0.339079	0.00182984	0.00241925	0.00209016	0.00227638	0.0122248	0.269247	0.0327967	0.19761	1.09405	+			+	0.00509694	0.837891	0.146122	0.0108977	-0.23645	-0.0716367	0.8248
DMKJLJHC_01099 Sarcosine oxidase subunit gamma	MSNAVSALNSERHEGFVTVSEAGLVGMITIRSDQASKPLVKALKDLGLSLPPKRGISEAGGLVLAWMSPDELLLICPHDQAPAHTGALEAALAKTHALVVNVSDARALMHVRGARADEVVMKLSPADTQQLLAGEMRRTRFAQVPAAFWRSGREEISVICFRSVAAYVMGLLEVSARPGSELF	K00305	soxG; sarcosine oxidase, subunit gamma [EC:1.5.3.1]		19.2775	21.6069	19.1007	22.6867	22.7379	22.8259	22.9989	22.6864	22.7072	23.0832	22.4787	22.3282	21.5614	22.7735	21.1256	19.995	22.7502	22.7975	22.63	21.8202	1.14206	0.0574864	0.142667	0.326298	0.697203	0.00117788	0.00872353	0.00917532	0.00793699	0.013062	2.75512	2.80246	2.63498	1.82513	+	+	+		0.0270934	0.0262092	0.0349367	0.125959	0.0473433	-0.12014	-0.929987
DMKJLJHC_01100 Sarcosine oxidase subunit alpha	MSTRLSKGGRLIDRATPLNFTFNGKPMRGYAGDTLASALLGAGQVMLGRSFKYHRPRGLVASGVEEPNALVELGRNARFEPDQRTTTTELFEGAETRSQNHWPSLEFDVGEINDKLYKFLPAGFYYKTFMAPRAAWKHLFEPVIRKSAGLGGAPKEADPDRYEQVYAHCDVLVVGGGVAGLAAALREGRKGQRVWLVEQTAHWGGRTPVDGGQIDGEEAADWIKIALQELESLPNVTLRTRLMAAGQYDHGYVIGLENLGDTRPGADVPRHRLWRIRAGRTITATGALERPLSFAGNDVPGVMLASAVRDYVVNWAVSPGDRVVVVTNNDDAYRTALALLDAGLSVPAIVDAREESHGALPQVAKARGITVLEGRGIARVLGRTHVTGVEVCMQAGEGG…	K00302	soxA; sarcosine oxidase, subunit alpha [EC:1.5.3.1]		24.9651	25.0508	25.0255	26.3281	26.0229	26.2005	25.909	25.6079	26.0489	26.2393	26.3334	26.3186	22.3431	21.3002	22.7364	25.0138	26.1838	25.8553	26.2971	22.1265	0.0359344	0.125144	0.184034	0.0413419	0.605952	0.0381858	0.0942601	0.0764014	0.100823	0.0161524	1.17001	0.841463	1.28329	-2.88727	+	+	+	+	0.000220835	0.00315773	4.94906e-06	0.00254403	-0.32855	0.11328	-4.05728
DMKJLJHC_01103 Sarcosine oxidase subunit beta	MKRYSIFAVAREAMRYHAGWERAWRSPAPKKRYKVVVVGAGGHGLATAYYLGKVHGITDVAVIEKGWLGGGNTGRNTTIIRSNYLQDPSAAIYEKARALYENLSQDLNYNIMFSPRGLLMLGQTEHEVRGYQRTVHANALQGIETRWIGPQEVKKIVPILNIDGPRYPVLGALYQERGGTARHDAVAWGYARACSAMGMDIIQQCDVTGIRRDGNRVQGVSTTKGEIDCDQLALVVAGHSSVLAEKAGFRLPIESVALQAWVSEPIKPCMDVVVMANTVHGYMSQSDKGEMVIGGGTDGYNNYTQRGSWHHVEETTRALVETFPIISRLKMLRQWGGIVDMTGDRSPILSKTPVEGIFVNCGWGTGGFKAIPGSGYAMAELIARGQSPLADAFGLERFR…	K00303	soxB; sarcosine oxidase, subunit beta [EC:1.5.3.1]		23.2716	23.4294	23.53	25.1053	25.1767	25.1	25.0292	24.684	24.9681	25.1294	25.0904	25.1394	22.3009	21.7149	22.6719	23.4103	25.1274	24.8938	25.1198	22.2292	0.106388	0.0349729	0.150376	0.0211366	0.393989	0.0125664	0.045321	0.0392337	0.0445802	0.017344	1.71701	1.48342	1.70941	-1.18112	+	+	+	+	2.67651e-05	0.000339033	2.39936e-05	0.0149383	-0.23359	-0.00759667	-2.89813
DMKJLJHC_01104 hypothetical protein	MLFWIIAVALVVIIALMFVLAVRSGRGTAHDPSAAYDVQVYRDQLRDSARDAERGVISPEEAERTRLEISRRMLEADRIAQNGADSTRAPRAALVALALGGAAVIGATFWLYLRTGAEGYADQPIAERYAFANERYDSRPDQAKAEELAGAQTAEQPKVDPKFLALMDKLRAAVKANPTDRQGLVLLARNEATLGNFDAAWKAQKRLVALEGDSASAHDYAELGELMVVAAGGLVTPEAEAAFAQALKIDPKNGLSLYYIGLMMIQNAREDRAFTIWDGLLRNSPDDAPWVPTIRKNINELAWLAGQNDYTPPAPRTSGPSQADIAAAAQMDPAARQQMIQGMVDQLSDRLARQGGPVDDWARLISSLRLIGETERADAIYAEARDKFAGQPSARAQLD…	K02200	ccmH; cytochrome c-type biogenesis protein CcmH		22.0845	22.1058	21.3502	21.4346	20.6293	19.9125	21.7299	21.534	19.9887	21.0672	21.5441	21.1313	22.3499	22.4862	21.5506	21.8468	20.6588	21.0842	21.2475	22.1289	0.35128	0.621737	0.778733	0.211317	0.412686	0.00425152	0.00204707	0.00279813	0.00304425	0.0161788	-1.18801	-0.762613	-0.599307	0.28208					0.0782823	0.275377	0.107536	0.502511	0.4254	0.588707	1.47009
DMKJLJHC_01112 UDP-N-acetylglucosamine 4-epimerase	MSSQRIFITGSAGFIGYHLAKLLLAEGARVHGFDGLTDYYDVALKQRRHAMLLQNGAFSATEAMLEDREALDAAIDAFKPDVIVHLAAQAGVRYSLENPRAYIETNILGTFNVMEAARRHEVDHLLMASTSSVYGANTQMPYAETDKADTPLTIYAATKKANEAMGHSYAHLWNIPTTMFRFFTVYGPWGRPDMALFKFTDAILDGRPIDIYNHGEMYRDFTYVDDLVRGIAGLIGAAPVRPQDPEEIAEGDSLSPVAPYRIVNIGNSDKVKLLDFVEAIEDALGMTAKRNYMEMQKGDVPATWADARLLQSLTGYRPQTEFREGVTRFVAWFRDYYER	K08679	E5.1.3.6; UDP-glucuronate 4-epimerase [EC:5.1.3.6]		21.7827	21.7598	21.4975	21.7911	21.9938	21.6054	21.9019	21.8174	21.7598	21.5356	21.7804	21.781	22.2708	22.5827	22.2023	21.68	21.7968	21.8264	21.699	22.3519	0.129402	0.15861	0.0583644	0.11556	0.165567	0.00378721	0.00450501	0.00468042	0.00416278	0.0188835	0.116797	0.146403	0.0189967	0.671943				+	0.464958	0.218449	0.884438	0.0106407	0.0296067	-0.0978	0.555147
DMKJLJHC_01113 hypothetical protein	MLKVYLSGEIHTDWREDVKSACKGLKIEWFGPVTDHAASDDCGVEIFGPEPDKFWHDRKGAALNAIRTRSGIEGCDLLVVCFGEKYKQWNAAFDAGYAAALGKPLIVLQPEDHDHALKEVDAAANAVARTPGEVARALRYVLTGTL				22.3207	22.2441	21.8857	21.9198	22.1538	22.1347	22.1595	21.9492	21.7658	22.1982	22.0443	21.7113	22.0429	21.4154	21.6733	22.1502	22.0694	21.9582	21.9846	21.7105	0.189603	0.106095	0.160849	0.203203	0.257535	0.00524634	0.00544218	0.00512811	0.00507421	0.0121062	-0.0807233	-0.191983	-0.165547	-0.43961					0.627061	0.33621	0.446992	0.123804	-0.11126	-0.0848233	-0.358887
DMKJLJHC_01116 L-threonine dehydratase catabolic TdcB	MVVLADVEAAAQVIAGQADATPLVPSMLGPRLGGDLWLKLEICQPMGAFKLRGALNALAHLPEEAAGVTCCSTGNHGRAVAYGAKLRQIRAVICMSELVPQAKVDGIRALGAEVRIKGGSQDEAQLEATRLVQDEGLIDIPPFDDPHVIAGQGTIACEMLRARPDLDTLLIPLSGGGLAAGMAVAARALNPDIRLIGISMDRGAAMAASIKTGHPVAAREVASLADSLGGGIGLENKHSFALCRDLLDTVVLVSEDEIYAAMQALYYEDRLIAEGACAVGIAALMAGKIAPSAQMGTVLTGRNLDMEQFARVITGQDVRLDEITVKGAPYAP	K01754	E4.3.1.19; threonine dehydratase [EC:4.3.1.19]		21.0836	20.7076	20.8452	21.012	19.9277	20.3241	20.7549	19.7448	20.654	19.5657	19.6074	18.7792	21.3614	21.116	22.2233	20.8788	20.4213	20.3846	19.3174	21.5669	0.155341	0.447956	0.454253	0.380984	0.474848	0.00217341	0.00173634	0.00172288	0.000798844	0.010959	-0.45751	-0.49424	-1.56139	0.68811			+		0.244089	0.219122	0.00581931	0.12327	-0.03673	-1.10388	1.14562
DMKJLJHC_01117 Glutamine transport ATP-binding protein GlnQ	MMEDLSQYPLELKGPDIPMVRFSRVTKRYGDLTVLDDLDLDVTTGEMVTIIGPSGSGKTTVLRMLMTLETINEGVIYVDGQPLTHMVKGDKLVPADRKYLRKMRSQIGMCFQHFNLFPHMTALENCMEGPVQVLGMKKKEARERSEELLELVGMADKRDQHPSRLSGGQQQRVAIARALAMRPKVMLFDEVTSALDPEVIGEVTNVIRSLVDEHNLTMLMVTHQMGFAKDISDRVCFFYGGSIEEQGTPEELFGNPRRERTQQFLSAVKEAG			K02028	21.7649	21.4464	21.69	20.5458	21.3281	20.1216	20.9833	20.493	20.7523	20.6137	21.2873	19.2272	21.4492	22.5034	21.0077	21.6338	20.6652	20.7429	20.3761	21.6535	0.135962	0.499711	0.20028	0.857625	0.627461	0.00366783	0.00205613	0.00220857	0.00166397	0.0116366	-0.968593	-0.890917	-1.25771	0.0196933		+			0.0572788	0.00649428	0.109893	0.967478	0.0776767	-0.28912	0.988287
DMKJLJHC_01120 L-cystine-binding protein FliY	MKSILKSVAAAGLGLALSATTLVAGPLMDRINKGEPIRIGFANEVPWAYPGDNNKPLGFVNAYVLGVLHEMGYDNVKPVVTDWGGLIPGLNAGRFDMVTGGLYILNSRCQNVLFSEPMAKVGDAFIVPKGNPKNLNNYEQVAKAGATFVTGAGYNQVESAKKGGIKDSNVMTVPGPTEILAAVRAGRADAGGVTYFTAQNLAKQSGGTVQVSDVSQLPDWTQNWVGIGFRKNDGDFVKKFNAAQKKYLGSPAMMKAVEEYGYTKANLPGDKTSAEVCKMR	K02030	ABC.PA.S; polar amino acid transport system substrate-binding protein		27.6482	27.9792	28.042	25.8474	26.0337	26.4014	26.337	26.524	26.539	26.6964	26.1273	26.1417	27.4155	25.403	26.3074	27.8898	26.0942	26.4667	26.3218	26.3753	0.172761	0.230162	0.0919014	0.264954	0.822993	0.280318	0.08858	0.116722	0.102566	0.307065	-1.79561	-1.42309	-1.56794	-1.5145	+	+	+		0.000910383	0.000504076	0.00217999	0.0635092	0.37252	0.227673	0.28111
DMKJLJHC_01121 Ectoine hydrolase	MPILKPPFSKPEYDRRIALTRAEMARAGIDVLFITNPSNQFWLTGYDGWSFYVHQGVILTHEGAPFWWGRQQDGNGARRTVWMEDDQILTYADRYIQSPDSHAMEDLASHLRIMGFGEARIGVEMETYFFTARAGRVLEAGLPDASLIDASTLVNWQRLIKSDEELAFMRRAARISELVIARAVELAEPGMRKHDLVGELYKTAVQGEEDSWGDYPAIVPLLPSGADASAPHLTWNGEALKSGEATFIEQSGCYRRYHAPLCRTIFLGTPPQEMLDASEAITAGLAAGIEVARAGNRACDIARALEWELSKMGITKDNRCGYAVGLSYPPDWGEHTVSLRASDETVLEPGMTFHFMPGLWMDDWGIETTETILIREDGPAEPLCTIPRQLFVKD	K15783	doeA; ectoine hydrolase [EC:3.5.4.44]		23.7795	24.2519	24.297	21.1198	21.254	21.8374	21.6688	21.5425	21.5594	21.3816	21.0689	21.7514	21.016	22.5879	21.3542	24.1095	21.4037	21.5902	21.4006	21.6527	0.234081	0.31148	0.0559912	0.278968	0.67558	0.0204018	0.00343069	0.00397362	0.00338514	0.0116303	-2.70573	-2.51927	-2.70883	-2.45679	+	+	+	+	0.000602752	0.00012125	0.000461786	0.00828258	0.186453	-0.00310333	0.248933
DMKJLJHC_01125 Protocatechuate 3,4-dioxygenase beta chain	MTDLGPLIPRNRAIHPEPYDPGYKTSVTRSPNLPLLSLESGPSEETGPAFGHGLIGALDNNLILNWTQGAAPAVGERILLHGRVLDENARPVRNTLVEIWQANAGGRYRHKKDSYFAPLDPNFGGCGRTLTDDEGRYEFLTIRPGAYPWPNRGNDWRPMHIHVSVFGHSFGQRLITQVYFEGDPLIAHCPIAATIKSRAQLDRLVAPLDLAHSRPQDYLAYKFDIVLRGRRQSMFENKLEGM	K00449	pcaH; protocatechuate 3,4-dioxygenase, beta subunit [EC:1.13.11.3]		20.7118	20.3513	20.6781	20.781	20.9589	20.981	20.383	20.4434	20.4621	20.7172	20.7153	20.6022	22.368	21.3418	21.5324	20.5804	20.907	20.4295	20.6783	21.7474	0.162577	0.0895125	0.0337735	0.0537718	0.445651	0.00176733	0.00243126	0.00177742	0.00205173	0.0124195	0.326537	-0.15089	0.09785	1.16698				+	0.0676122	0.268117	0.464342	0.0253753	-0.477427	-0.228687	0.840447
DMKJLJHC_01128 Glycine betaine/proline betaine transporter BetS	MHGLARRLGLRTDPTIFFVSAGATLVFVIALVLFPTAIGDAFAAGRAWIVTNLGWFFILGVNIWLGFLIWAAMSRHGHIRLGPRDSRPEYSNLSWFTMLFAGGIGTVLMFWGVAEPISHFSKPPLPGVEPYSDQAARDAISIAIYHLGLHTWTIFALPGLAFAYFINRYDLPVRVSSVFYPLLREGIYGPVGKAIDIASIIGTLFGVAVSLGLGSSQIAAGLNALYGTGDGVVVKVIILAVLTGVAITSITAGLDKGVKLLSNINIGMAVGLLIFVLVFGSTLFLLRGMVQTFGLYFENLPRLAFWNDMLANENPDTPGWGWQGSWTVFYWAWTVTWSPFIGLFVARISRGRTVREFVFGVLLAPSLFTLIWFSIFGWQAMEFDGIGQAARDAMGAQAG…				20.1305	20.2233	19.5329	20.9971	20.9861	21.3739	19.0875	21.4827	20.3588	21.1661	21.1328	21.3888	21.8161	21.0848	21.7301	19.9622	21.119	20.3097	21.2292	21.5437	0.305944	0.180264	0.978437	0.113652	0.326386	0.0011514	0.0028162	0.00163573	0.00300591	0.0107839	1.15677	0.34745	1.267	1.58144	+		+	+	0.00997894	0.656744	0.00536294	0.00749397	-0.809317	0.110233	0.424673
DMKJLJHC_01129 hypothetical protein	MNLTLKSTSAMALALTLLSAPAFADMTDAKAFLDKEIGDQSALSRADQEAEMQWFIDAAEPYAGMDIKVVSETITTHEYESQVLAPAFTAITGIKVTHDLIGEGDVVEKLQTQMQSGENIYDAYINDSDLIGTHWRYQQVRNLTDFMAGEGKDVTNPGLELDDFIGTQFTTAPDGKLYQLPDQQFANLYWFRYDWFNDEQNKADFKAKYGYDLGVPVNWSAYEDIAEFFTGRDLSRLGVDGKVYGNMDYGKKDPSLGWRYTDAWLSMAGVGSKGEPNGLPVDEWGIRVNDKSQPVGSCVDRGGATNGPAAVYAVTKAIDWLRNYSPPAAMGMTFSEAGPIPAQGNVAQQMFWYTTFTADTVKPGLPVMNEDGTPKWRMAPSPHGVYWEEGTKLGYQDVG…	K17321	glpV; glycerol transport system substrate-binding protein		27.9822	27.9861	27.9124	27.8258	28.0216	27.7975	26.8237	26.9477	26.9863	28.2253	28.0989	28.1009	27.4287	22.0456	26.2999	27.9602	27.8816	26.9192	28.1417	25.2581	0.0338739	0.0996406	0.0693614	0.0591224	2.31784	0.294351	0.305784	0.159731	0.362111	0.141555	-0.0786233	-1.04099	0.181477	-2.70216		+	+		0.350313	4.45293e-05	0.0196634	0.17459	-0.96237	0.2601	-2.62353
DMKJLJHC_01133 Trehalose import ATP-binding protein SugC	MAKITLDNLAHSYLPNPASEEDYALKELNHDWEDGAAYALLGASGCGKSTLLNIISGLLQPSQGRILFDGQDVTHAPTAERNIAQVFQFPVVYDTMTVRDNLAFPLRNRGREESYVAERVQEIARMIGMEDVLNKKARGLTADAKQKISLGRGMVRKDVNALLFDEPLTVIDPHMKWELRTQLKKLHHDFGHTMIYVTHDQTEALTFADKVVVMYDGRVVQIGTPEELFERPEHTFVGYFIGSPGMNVIPAKIDGTRAYIEGSPIDLGRGYDALEGKLEIGVRPEYATLSQDEGLPVTIRRIEDAGRHKIIRAEFFGHDINIIAGEDDPVSADMNRVRFDPAHVNVYANDWRVPGRAA	K17325	glpT; glycerol transport system ATP-binding protein		21.0285	20.7332	20.8593	21.618	22.5048	21.7399	21.625	21.7123	21.7919	21.9498	22.2664	22.5078	22.9077	22.3394	22.8291	20.8737	21.9542	21.7097	22.2413	22.692	0.120979	0.392485	0.0681646	0.228493	0.251437	0.0021657	0.00502455	0.00431681	0.00606247	0.0239039	1.08056	0.83603	1.36765	1.81836	+	+	+	+	0.0204607	0.00104377	0.00170721	0.000770225	-0.244533	0.28709	0.7378
DMKJLJHC_01134 sn-glycerol-3-phosphate import ATP-binding protein UgpC	MTLELKGVSKQVEGQVHIHPTDLTLEKGTMNVLLGPTLSGKTTLMRLMAGLDAPNSGKILWEGRDVTGMRVQDRKVAMVYQQFINYPSMTVYENIASPMRLMGVSKAEIDRRVRETADLMQLGPMLERKPLELSGGQQQRCALARALVKNAGLVLLDEPLANLDYKLREELRIEIPKIFEASGAIFVYATTEPEEALLLGGNTAALWEGRVTQFGLTPTVYRQPVDATTARVFSDPPMNFLTLTKTGDTLSFDDGQSAPVSGTLVELPDGRYTAGFRPNHLEITKHTANALQFTAKLHVTELTGSETFVHLDHGTERWVGLIHGVHDLALDEDLSVWLDPRHVYIFSETGELIAPAAYALAA	K17324	glpS; glycerol transport system ATP-binding protein		19.2722	19.7029	21.733	23.0478	22.4633	22.7095	22.2378	22.4846	22.3266	23.0855	22.9652	23.1282	21.6105	22.2265	21.5976	20.2361	22.7402	22.3497	23.0596	21.8115	1.07302	0.239622	0.102051	0.0690219	0.293457	0.00139205	0.00866343	0.00672674	0.01069	0.0129839	2.50413	2.1136	2.82357	1.57546	+		+		0.0322484	0.0501685	0.020587	0.115737	-0.390533	0.319437	-0.92867
DMKJLJHC_01142 Biphenyl 2,3-dioxygenase subunit beta	MTQMSKIDTKTLLQDVTAFIWAEGAMLDAKEYDAWLDLWTDDGLYIMPIGDGEDYANQVNLCYDNAKMRRDRIGRFHMGFSISSAPPAQTVRTLSRFRIEAQEGAEITVTCAEHVVEDKFGRQRVWAGNVRYVLHVTEGGFKLHSKIVRLLNSDGMLNSFSYLF				18.7141	20.9896	18.9708	21.1518	21.0804	21.2949	21.5574	21.5473	19.7905	20.2683	19.8472	19.529	21.6355	22.0242	21.8254	19.5582	21.1757	20.9651	19.8815	21.8283	1.0176	0.0891771	0.830543	0.302804	0.158725	0.000870139	0.00292911	0.00257634	0.00118105	0.0131362	1.61755	1.40691	0.323337	2.27018				+	0.0886791	0.204401	0.688882	0.0356191	-0.21064	-1.29421	0.652633
DMKJLJHC_01143 Anthranilate 1,2-dioxygenase large subunit	MSLDMPKFSDLDALYDEKNAQVATQMYEDPELFAEEMERIFKKTWVFVAHESEFPDKGSFKLSTVGQEPVIVVRDRKGKLHCMVNRCRHRAATVCEVKQGKTSSFQCPYHGWGYGLDGSLRALPYPEQYGDDFDKAQHGLLKLRTESYQGMVFATFNDDIEPLVDFLGSEVCRYIDLFMKQGGGFPVKVLGEHQFTVPMNWKVQLENTTDAYHFPVVHKSFMQTLDGATEEMFDFLDKGKGWVEDLGNGHSVMMMIPELEDLDANLDAPIPERFADLAQELRDEGYPDDQVRKIVRAVGGAGFNLNLFPNVSLSLAFFRVLTPVSVDRTDIRHMALGMDGGPAAANRARIRLHEHFQGPMGFGSPDDAEVWERIQRGVQGGDDLPILVNRGLVDEEPGV…				20.3871	20.3862	20.4875	24.3926	23.784	24.0207	20.8361	19.9429	20.2211	21.44	21.4358	20.9904	22.6487	22.1904	22.0856	20.4203	24.0658	20.3333	21.2887	22.3082	0.0475613	0.250492	0.373178	0.210982	0.244505	0.00158167	0.0217133	0.00166277	0.00313248	0.0183203	3.64547	-0.0869567	0.868443	1.88795	+		+	+	3.53155e-05	0.760141	0.00474589	0.000429293	-3.73242	-2.77702	-1.75752
DMKJLJHC_01148 Phenylacetaldehyde dehydrogenase	MQISHPESAVSDILPDVSAFLKKPQMMIGGKSVAAASGQVFDVFNPATGAVLAQAPAGGAEDVDRAVKAAQAAFEGPWSQMLPTERQRVILKLADLIEANGEELAQLETLNQGKSIMLSRLIEVQASAEYFRYMAGWATKIEGATLDLSIPIPPGMRYQGFTRKEPVGVVAAITPWNFPLNMATWKLAPALATGCTVVLKPAEETPLTAMRLAELCLEAGIPEGVVNVVTGSGAEAGAALVAHPGVAKIAFTGSTETGKAIGIQAMKDMKRVTLELGGKAPMVMFDDMDMELLGVAAGIGAMFNSGQTCCAGTRIYVQRGIYEQALEVIAGVTRSLTMGNGLDPAHQINPLVSARHQAHVQSCITRGIEAGATPVIGASAPESGYYVAPELFTDVRQDM…	K00146	feaB; phenylacetaldehyde dehydrogenase [EC:1.2.1.39]		21.9157	22.7673	23.1911	25.2321	24.9529	25.2299	20.6928	20.2095	20.9538	22.8435	23.262	22.501	22.0149	22.0552	22.0981	22.6247	25.1383	20.6187	22.8688	22.0561	0.530363	0.131122	0.308355	0.311199	0.0339519	0.00728961	0.0456661	0.00202644	0.00936575	0.0153822	2.51361	-2.00599	0.244137	-0.568633	+	+			0.00287907	0.00984985	0.604443	0.20479	-4.51961	-2.26948	-3.08225
DMKJLJHC_01155 Solute-binding protein	MSFLKCLLSGRTKPLAVGALIAAGFLAGPVHAEDTLRALTAFPSSDDTSKAFKTFVDEVNARGKGVLHIDIVGGPEVVPGFQQIDAVGRGVVDMTMSPISYALGTMPEADAWVGSNLSPVETHENGGLALIRKIALEKLKVHVLSRFAPGAPLNLFLVKKPKMNADGSPDFSGLRLRASPLYNSFWESLGAVPVNVPVPDIYTGLERHSFDGIGYPPSAMVGWSWDRFLKYRIEPGFLQTDLGLFISPAKWNSLSDASRKLLNDMTTEMEGKSYQDWLEKTKEVKAKFDAEGMQPIELKGAAREAYLAKAYGSVWDRLAKSGSPYAAELKKLYYKN				20.8369	21.3687	20.4799	24.8093	24.9237	24.7691	20.1349	19.9884	19.925	20.436	21.1303	21.1043	22.5822	21.1903	21.7442	20.8951	24.834	20.0161	20.8902	21.8389	0.365199	0.0655283	0.0879013	0.321314	0.572174	0.00219817	0.0369831	0.00133451	0.00237639	0.0132327	3.93889	-0.879087	-0.00494667	0.943757	+	+			0.000114683	0.0296629	0.989214	0.120686	-4.81798	-3.94384	-2.99514
DMKJLJHC_01160 4-methylaminobutanoate oxidase (formaldehyde-forming)	MAPRIVPVQTTQDLPARSTVVIIGAGIVGLSAALTLAERGVPVVVLEKGRIAGEQSSRNLGWVRKMGRAAPDVPLAQTADRLWAGLPERTGHEVGYARAGIMYLARTEEEMEMHRGWMASVADLDLDSQLLSPSQIDAMVPGGVGTWAGGIHTASDGRAEPTLASSAIANAAIAKGAIIVEHCAVRTLSRAGGKVSGVVTERGEIACDQVLLAGGLWSRRFLGNLGVNLPTLPLICSAFRTAPMEGPTEIAVGGPDFSFRKHRDGGFIITQRGALRAPLTLDHLLIGRRYLDQLKGGGKFLRIALGRETWRDLTLARRWGGNKPSPFETVRVMDPPTIPTLNSEAIDNLRAAWPAFADVTIEEAWAGMMDITPDSQPVIGPVAAIPGLTLATGFSGHGF…				19.1178	20.4389	21.6751	24.2457	23.8829	23.7894	20.7567	20.4831	21.5839	23.7934	19.8076	23.8187	22.3623	20.8947	21.8516	20.4106	23.9727	20.9412	22.4732	21.7029	1.04421	0.196784	0.467975	1.88491	0.608312	0.00157105	0.0203566	0.00253414	0.00711971	0.012042	3.5621	0.530663	2.06267	1.29229	+				0.00903151	0.54773	0.247258	0.204999	-3.03143	-1.49943	-2.2698
DMKJLJHC_01185 1,5-anhydro-D-fructose reductase	MRAALIGLGMVAKTHVAAIAATKGRITLEGVCARHNERAEAFAQEVSQAGQGTPKAYKSVAEIAADPDIDFAIVLTPPNARIEAVEALAAAGKPILMEKPVERTLKAATRIVEICEAAHVPLGIVLQHRMRASARRLSEMLAEGALGEIGLVEITVPWWREQSYYDEPGRGTYARDGGGVLISQAIHTLDLALSLTGPATRVQAMARTSRLHRMEAEDIVSGGIDYASGAVGSLFATTASYPGSAESILLHGTKGSARIVSGQLDLSWRDGTTESFGEGSGTGGGADPMAFTHEWHQAILEDFADALEHNRAPIVTGRAALAVHHLIEALVTSSREGRAITLSEIS				22.0441	21.7327	21.765	22.7914	23.0483	22.8985	22.9891	23.0083	22.879	23.3187	22.9615	22.7882	21.7613	21.2054	20.6277	21.8473	22.9128	22.9588	23.0228	21.1981	0.13981	0.105365	0.0569667	0.220853	0.462827	0.00425292	0.00976427	0.0102605	0.0104205	0.00848697	1.06546	1.11147	1.17549	-0.649183	+	+	+		0.00100151	0.000480641	0.003133	0.130405	0.04601	0.110027	-1.71464
DMKJLJHC_01186 D-xylose dehydrogenase	MTRPIRFAALGIDHRHIFGMAQKLMDIDAQFVGWWTEGSPEPLEGFEKRFPDVPRIAKKEDILADDTVDLILISSIPRDRAALAIAAMQAGKDVMTDKPGCITLEELAELQKVQAQTGRIWSIDFSERFEVPAVTRAAELVAEGAIGRVIQTVGLGPHRLNAPTRPEWFFERESYGGILTDIASHQIDQFLFLTGSTDARVEWATVANHAHPQWPGLQDFGELVVRSDQGHGYVRVDWFTPDALPTWGDGRLTILGTEGYIELRKYVDVGGAEGCDHLVLVNGDRCEKIQCSDAGLPYFARLLHDIRERTETAMPQAHAFKVMELAIKAQMLAEGKSA				24.0652	24.0497	24.0843	25.1268	25.1534	25.0631	24.8873	24.7604	24.982	25.0733	25.3766	25.1922	25.0796	21.492	22.1083	24.0664	25.1144	24.8766	25.214	22.8933	0.0141669	0.0378641	0.0907739	0.124756	1.56627	0.0198018	0.0449164	0.038769	0.0475906	0.0274824	1.04801	0.810173	1.14763	-1.1731	+	+	+		3.3051e-06	0.000237759	0.000206599	0.349242	-0.23784	0.0996167	-2.22111
DMKJLJHC_01187 Glucose--fructose oxidoreductase	MIGVAIIGAGIGREHLDGYRALPDRYKVHAVVDLDTARAQAAVGEDPIRVETQIEAVLENPEIELIDVCLPPHLHLPVSLQALGAGKHVICEKPLVASLADADRLIAAAKEADRIVTPVFQYRYGPAMAQLRALIAAGLTGKPYAASLETHWMRGPDYYATPWRGTWKGENGGAVLGHAIHNHDLMMMVMGPVARLSAMCATRVNPIETEDCAAISFEMTSGAVVTSSITLGAADDTTRIRFCFEGLTAESGTAPYAPATDTWRFTARAPYAQAAIDEVLATVPAGLSGFAGFLEATADALEGRPEHAVTLADGRRSIELVTAVYQAARDGARVALPLGPDAPFYRGWIPSET				22.6237	22.7072	22.5487	23.0831	23.4841	23.2917	23.0102	22.8765	22.9382	23.5731	23.4913	23.615	22.7344	21.3091	21.1985	22.6265	23.2863	22.9416	23.5598	21.7474	0.0647342	0.163731	0.0546658	0.0513837	0.699437	0.00729893	0.0126497	0.0101394	0.01512	0.0124191	0.65975	0.31511	0.933287	-0.879177	+	+	+		0.00608975	0.00625638	8.9889e-05	0.151427	-0.34464	0.273537	-1.53893
DMKJLJHC_01188 putative arabinose-binding protein	MIQKRKIAAAAVAATFLAASTASAEVQLRFECAQDGNECDTMMTIFKQFEAKHPDIQVKMDLVPYKAILENLPVDLAAGTGPDLAKVTDLGGLHKYYLDLSPYVEKTYWEDNFGKTLDWYRAGPQDKGIYGLQTQLTITGAFVNKTLFDQANVALPGKDATWDDWAKASREVAKATGTRYPMAMDRSGHRFAGLAIPYGATYFDADGNPELNDPGFAAASKQFVAWNADGTMDRNVWAGQGGTSYADATKEFVNGELVFYYSGSWQIQKFADQIGDAFDWEVVPAPCGPAGPGHCSGMPGGSGVVGFKSTKHPKEVAELLNYLAQPDNYAMLEAKSLNIPANATVAKAGVKYEGATPAAAKALNAFSAQVPTISPVGYAYQGYKNNRAMFNITVTRLTQ…	K17241	aguE; alpha-1,4-digalacturonate transport system substrate-binding protein		27.7144	27.7804	27.6741	29.372	29.4044	29.208	28.4207	28.4253	28.4251	29.3895	29.4881	29.4754	28.7701	26.8044	27.9406	27.723	29.3281	28.4237	29.451	27.8384	0.0438287	0.0859847	0.00211761	0.0438063	0.805759	0.249717	0.833394	0.453192	0.897363	0.846588	1.60511	0.700727	1.72798	0.115387	+	+	+		1.93715e-05	2.27667e-05	2.47017e-06	0.849613	-0.90438	0.122873	-1.48972
DMKJLJHC_01190 L-arabinose transport system permease protein AraQ	MTAFLTRTRGRKRLHWTDWMAYAYLTLGVLLMFGPVLWLVLSSFKTERELQNYPPRLLPYVQKMETVPGYDKPLPIYKVTAGPLAGQEVAQIRRIGLISQVVKPSDPKTVLKVPFKDRKAVEHVALATSNYSKLFERFNFFRFFYNSTFITVMATLITLLVNSMAAFALSKYQFRGRGLVMALIIGTLMIPPTVVLVPLFLIVRDFGMIDSLWGVIIPGAATPTGVFLLRQYMLTIPDEILDAARMDKASEWKIYWRIILPLSAPAIAVLAILSIMWRWNDFLWPLIALQKQENFTLQLALNSFRGEFTTDWASLLAMTVLTLVPIVVVFAFLQKYIATGIASTGGK	K17243	aguG; alpha-1,4-digalacturonate transport system permease protein		21.9676	21.9021	22.0336	22.5567	22.6306	22.956	19.8709	18.6295	19.3855	22.5266	22.7402	22.6243	21.4116	21.5553	21.9962	21.9678	22.7144	19.2953	22.6304	21.6544	0.0536848	0.17344	0.510794	0.0873185	0.248742	0.00462329	0.00851018	0.000809761	0.00793901	0.011644	0.74667	-2.67245	0.66262	-0.31339	+	+	+		0.00435068	0.00181682	0.000794482	0.156533	-3.41912	-0.08405	-1.06006
DMKJLJHC_01191 Maltose/maltodextrin import ATP-binding protein MalK	MSDLELRGVTKAYGNVEVIKGIDLKVEDGDFCVFVGPSGCGKSTLLRMISGLEPISGGDVCIGGDVVNDLGPADRGLAMVFQSYALYPHMTVRQNLSFGLENLRASKAEITERVTATAQMLQIEMLLDRRPKDLSGGQRQRVAIGRAVVREPQIFLFDEPLSNLDAELRVEMRGEISRLHRRLNNTMIYVTHDQVEAMTMADKIAVLRDGRLEQFGRPLDLYNTPDNIFVAGFIGSPKMNFFPGRVEAGGLRLETGTVVALPPGKFMLNEGEQVTLGIRPNGMQPAETGLPLTVSGVERLGGESYLYGTASDGTAVTVHCAGQTKIEPGTQIALTLETGEAHVFSTQSGQSLLRKGA	K10111	malK; multiple sugar transport system ATP-binding protein [EC:3.6.3.-]		23.5271	23.5545	23.5266	24.6662	24.7464	24.9153	24.6208	24.3111	24.6158	25.1509	25.0642	25.056	21.2508	21.7158	20.9864	23.5361	24.7759	24.5159	25.0904	21.3177	0.0130452	0.103794	0.144837	0.0429557	0.301524	0.0137105	0.0355235	0.0301924	0.0436811	0.00922021	1.2399	0.979807	1.55431	-2.21839	+	+	+	+	7.42362e-05	0.000677374	1.04097e-06	0.000483644	-0.26009	0.314417	-3.45828
DMKJLJHC_01192 Mannonate dehydratase	MKQTWRWFGPQDTVGVDEMLQAGVQGVVSALHHLPPGTVWPIEEIRKRQAQIATRADGTASGLSWDVVESLVVSETLKTKGTGYAEHIAAWKQSLENLAACGIKVVCYNFMPILDWTRTQLRAPRPHGGTAMLFDLVDFAAFDIHILARPGAAEDHGPEIAAKANARFAQMDTRARKDLSGNIVAGLPGANDSWTLEQIRELLASYAAITPERLAANLIDFLSEVVPTAERLGLRLCCHPDDPPFPLLGLPRVMSSLSDYTRILNAVDSPANGATLCTGSLGVAPGFDPVRFITELGPRIHFVHLRNTTRIAPATAQRSSFYEAAHLEGDTDMVATIRALLAEENRRAAEGRTDAQIPMRPDHGQDILDDHNRAAMPGYPLIGRMRGLAELRGVMAALA	K01686	uxuA; mannonate dehydratase [EC:4.2.1.8]		21.1957	21.5973	21.7657	21.8891	21.4531	21.8475	20.0033	20.8808	20.2101	22.4211	22.6098	22.5934	22.1351	22.5093	21.3513	21.5196	21.7299	20.3647	22.5414	21.9986	0.239115	0.196458	0.374544	0.085363	0.482523	0.00338865	0.00430098	0.00169934	0.00746417	0.0147816	0.210357	-1.15483	1.02185	0.479043		+	+		0.390845	0.0212912	0.00470634	0.276814	-1.36519	0.811497	0.268687
DMKJLJHC_01194 4-hydroxyacetophenone monooxygenase	MLDTTVNTQTQEMLDSLNAALESGDVARAAALFATDSYWRDLVAVSWNLKTVEGPAGVADMLTHQLAYTRPGKFEIQSGEIPTEEGGVITAWVTFETKTGRGWGLMRIREGRIWTLLTALQELKGFEENRGTRRPMGAEHGARKNRLSWKERRAAEEADLGYDTQPYVVVIGGGQGGIALGARLRQLGVPAIVLDKHDRPGDQWRSRYKSLCLHDPIWYDHLPYIKFPDNWPVFTPKDKVGDWLEMYTKVMEINYWTRSEVTRASYDESSGKWTVEVNRDGETVTLEPTQLVLATGMSGKPNMPEFPGMETFQGTIQHSSHHQGPEAWEGKKVVVIGSNNSAHDICAALWESDADVTMMQRSSTHIVRSDSLMEIGLGALYSEEALANGVTTEKADMIF…	K07222	putative flavoprotein involved in K+ transport		23.6742	23.3649	23.4961	24.3658	24.1444	24.4961	25.6844	25.2966	25.6216	25.1843	25.0982	25.1823	21.0665	22.3573	22.475	23.5117	24.3355	25.5342	25.1549	21.9663	0.126752	0.145167	0.169948	0.0401084	0.638069	0.0134814	0.0261767	0.0611569	0.0456797	0.0144543	0.82372	2.02245	1.64317	-1.54545	+	+	+	+	0.00377823	0.00017469	6.29006e-05	0.0283134	1.19873	0.81945	-2.36917
DMKJLJHC_01195 Sorbitol dehydrogenase	MKAARWHGVKDIRVEEIETPTAGPGEVAIKVAWTGICGSDLHEYLAGPIFVPVEQEHPLSHDKAPITMGHEFCGVISDLGADVSGLAIGDRVAIEPIFACGTCPACREGKYNLCDSLGFVGLSGGHGGFAATSVVPARMVHKMPDDLSMEQGALVEPAAVALHAVRMSKIKAGDAAAVFGAGPIGLLVVEALRVAGAAQIHVVEPSQERREKALELGATSAIDPMAEDPVAKIRDATGGVHVAFEVTGVPKVLPQCIDSTRHEGQTLIVSIWEGDASFQPNTAVLKERQLQGTIAYRNVYPAVMELMAQGYFSADKLVTKRISIDEIVDQGFEALVAEKSQVKILVKAPD	K00004	BDH; (R,R)-butanediol dehydrogenase / meso-butanediol dehydrogenase / diacetyl reductase [EC:1.1.1.4 1.1.1.- 1.1.1.303]		25.5371	25.4242	25.4727	26.2637	26.2339	26.279	26.8841	26.7379	26.7661	26.8007	26.9086	26.6988	25.9825	21.3658	25.3319	25.478	26.2589	26.796	26.8027	24.2267	0.0462554	0.0187086	0.0633448	0.0856583	2.04034	0.0526792	0.0992932	0.146656	0.143141	0.0692559	0.780863	1.31803	1.32471	-1.25127	+	+	+		2.4669e-05	1.8592e-05	4.29697e-05	0.434821	0.53717	0.543847	-2.03214
DMKJLJHC_01199 Transcriptional regulatory protein DegU	MRILIADDHDLLRDTLVAFLETEEGIEVSSASNFQEACARIHNDAAYNLVLLDYKMPGMSGLESLEVVLALKGGQRVALISGQATREIAEQALALGAAGFIPKTLPAKSLVNAVKFMAMGEQYAPIDFMRASEQPEAHPMAQRLTRRENEVLKGLTEGKSNKEIARDLDLTEPTIKLHMKTLYRKLDVNNRTQAAIVARDAGLF				21.8432	22.1602	21.5641	21.2987	21.7088	21.4564	22.4658	22.5491	22.0625	21.5133	21.4136	21.8507	22.6979	21.7883	22.1909	21.8558	21.488	22.3591	21.5925	22.2257	0.243512	0.168902	0.212492	0.187036	0.372163	0.00427819	0.00363693	0.00677095	0.00386672	0.0173018	-0.367877	0.503257	-0.263307	0.36987					0.154021	0.0924302	0.291955	0.304769	0.871133	0.10457	0.737747
DMKJLJHC_01201 hypothetical protein	MRLIQSVFAPALALVIALASAPAMAEPLPKPTGPVLLTISGDIEITNTDEVTAAFDLAMLREIGQSDIETTTIWTEGRHRFTGVSLKALLERVGAKGKMLKATAINDYSVEIPTSDAVRNGPIVAYEMDGQTMSRREKGPLWVIYPYSSSSDYRSEVIYSRSIWQLDRISLE				22.9153	23.1891	23.4789	21.4896	22.658	22.4986	24.5089	24.2435	24.2176	23.1005	23.0152	23.1125	21.975	21.5483	21.7596	23.1944	22.2154	24.3233	23.0761	21.761	0.23012	0.517321	0.131668	0.0433378	0.174206	0.0108197	0.00602155	0.0264206	0.0108126	0.0125369	-0.979053	1.1289	-0.11837	-1.43346		+		+	0.0707925	0.00383149	0.514187	0.00216444	2.10795	0.860683	-0.454407
DMKJLJHC_01202 Autoinducer 2 sensor kinase/phosphatase LuxQ	MTPAEGPPVRAKFDKARIGSGILLTLAAMCLMAIAFLALEITRELRYLSSANSDNVHWTLSQAEVEFLELQHAVDRSLHRDNTGLDRVVEEFDIFYSRMDTLARGQLYAPLRRDPAFIEPVTAVRTQLDAMIPIIDGPRDQLRDQLGDFARELHPLRLEVRDLATAGLKHFARSSDASRVSVSVTLLRLGIVTGVLLLALAILLFNYRRVMFQIARRGRELSDAYARLNTILETSLDGVIVAEMDGQILSFNPAAERMFGLEAPDVIGRSMGELILSDPLRETDAAGMERASSNGPLHVIGQGRVKLDAKRANGDLFPLELAIERASTREGTLAVAFLRDISLRVAAENELVQARDRALAGEQAKSEFLAMMTHEIRTPLNGVLGNLSLLKGTQLGTAQ…				22.6255	22.796	22.8132	22.9382	22.6262	23.0527	23.5206	23.7343	23.3651	23.4443	23.4628	23.5795	21.8054	20.966	21.9899	22.7449	22.8724	23.54	23.4955	21.5871	0.0847167	0.180206	0.151355	0.0598404	0.445596	0.00792308	0.00949461	0.0153508	0.0144608	0.0111134	0.12745	0.795077	0.7506	-1.15781		+	+	+	0.416569	0.00291892	0.000513754	0.0225574	0.667627	0.62315	-1.28526
DMKJLJHC_01203 hypothetical protein	MSITRTRLLGTCIGALLTFGCSPAPSPQNIGPVRDGGGYQAQYRDPVKYDPQATALISKRLNSERCQPARGSASKSAGITAHALTGERLSRNDLVNVRVGDDKTFNGDYVISRDGMLKLPFLAPVRAQGRSPAQIEDDLGRALLKEGLYEEEPRISVRVADFAPVSVAVSGAVFEPHSVEIGQSGERVDTTRQQALGASTEARNLSGALRAAGGVRPDADLSAIELHRGGQRYVLDMRGVFEGRNSVDVMLLSGDEIVVPSRQCFQDDLMRPSPVSPPGVSLFLSNLTQPATGNAPSAIGREVREVPYGTRFLQAVVDTNCVGGTRSTNAKRSAVLVTRDPLTGVSTVIERNIEDMLQRADRDDYDPYLLPGDAIACYDSGVTNVTEAARAIGTVATVG…				22.9242	23.0312	22.6903	22.9962	23.0019	22.9902	23.2572	23.188	23.2205	22.9446	22.9994	23.0097	23.3083	21.9843	21.4967	22.8819	22.9961	23.2219	22.9846	22.2631	0.142345	0.00478147	0.0282883	0.028563	0.765382	0.00871251	0.0103448	0.0123135	0.010148	0.0177561	0.114147	0.339987	0.102623	-0.618827		+			0.320365	0.029571	0.374053	0.32385	0.22584	-0.0115233	-0.732973
DMKJLJHC_01209 hypothetical protein	MRWLFRALALIVLIALCLGGALVMLPTTKIAQIAEARFEAATGRKLTITGSVHASFWPQLGVRTGPVEIANADWSKDGPMLSAKGLQIGIDPGALIGGAIRVSKVTILSPNILLERGKDGTGNWQFTPKASTTGTKQAQPSAGGGVSAFSLDKGEIRDGSVTWIDRASGQHLALTGIDASLALPAYTGPANVSLTGKLNGKAVKAKGTLGAFASFLAGDAVPTDLALTLNGSSIDFKGSFGTSPLAAKGALSADLKDPAALAAMFGQPAPDLPKGLGRDTVAAKGDVTLGANGILQMRGGQLTLDGNAMRIAGNLSFATGRPRIDAQIDAGALDLSALGGSEPRGSGGASGSGPSGWSTAPIDASGLRALDGKIALTANSIDLGATKLGPTKAQVSLDN…	K07289	asmA; AsmA protein		24.493	24.5685	24.4569	24.4259	24.2277	24.0107	24.1427	24.0931	24.0178	23.9433	24.1935	24.2672	22.1009	20.6329	22.1846	24.5062	24.2214	24.0845	24.1347	21.6395	0.0464957	0.169574	0.0513784	0.138618	0.7126	0.0268588	0.0241873	0.0223898	0.0225221	0.0115243	-0.284747	-0.421653	-0.371473	-2.8667		+	+	+	0.0838388	0.00100212	0.022898	0.0047506	-0.136907	-0.0867267	-2.58195
DMKJLJHC_01214 Sulfoacetaldehyde acetyltransferase	MYVYQSIAQSLADHSLDTMFGLMGDANLFMVDHFVRDTGASFVPVAYEGSAVLMALAHGRVAGKVGIATITHGPALTNCVTALTEAARAHIPMVLLAGDTAVSNPQNLQNIDQRETVKITGAGFEQLRAPETASYDVAHAIYRAQVEKRPIVLNMPVDFMWQEVEHIRHVFPAYTAPAYVPEGDDLDQAIGMIASAKRPIILAGIGAKDSVAQIKALADRLEAPLATTLKAKGMFKDHPYNIDIFGTLSTPAAYEAIGKADCIIAFGTSLHHFTTDKGALMKGKRVIQINDTVTEVAKNFHPDAALVADAGLTADNILWWLNEAEIPGSGFTSELDIPALTAHPKGNPENAAAGYVNFEYALDRLEEALPKDRFLTTDGGRFMTEVWCRISCPNAQSFF…				27.5126	27.6686	27.5098	28.041	28.2002	27.9967	27.3703	27.1493	27.5707	28.1229	28.3361	28.5443	26.9264	24.8839	26.399	27.5637	28.0793	27.3634	28.3344	26.0698	0.074239	0.0873708	0.172124	0.172028	0.865748	0.223608	0.35069	0.217321	0.413852	0.248463	0.515627	-0.200243	0.770727	-1.49392	+		+		0.00313249	0.205383	0.00434685	0.0718707	-0.71587	0.2551	-2.00955
DMKJLJHC_01216 hypothetical protein	MKLLNVTAGAVIAATGFCSAAFATTDLTMWYHGAGNKVESKIVNQIIDDFNKSQSDYKVALQSFPQNSYNGSVTAAALAGKLPDILDMDGPVMPNWAWSGYLQPLPIPQDHFKGFLPGTKGIYNGKLYSIGLWDAAVALYARKSTMKELGLRTPTLDKPWTKDEFMHALKAAKASGKFDYAIDLGMSDKSEWYSYAFLPFLQSFGGGLINRETYDSAEGVLNGKDAIAWGNWWQSLFTDKLAPGTSQDPAAHETGFIDGKYAFSWNGNWNAVKTMAKVKDVEFLPAPDFGHGSKIGAASWQFGISASSKHPEGAAAFIEFATQDKYLADFSEALGLIPATKSAAQMTQMYADGGPLAVFYGLSAAQAEKRPVTPGYVVESKVFQKAAADIADGADVTDT…	K02027	ABC.MS.S; multiple sugar transport system substrate-binding protein		22.7747	23.0684	23.1676	23.1639	23.5282	23.4586	22.5931	22.1948	22.2035	23.6783	23.3336	23.6447	22.112	21.247	20.9726	23.0036	23.3835	22.3305	23.5522	21.4439	0.166803	0.15792	0.185739	0.155181	0.485543	0.00947895	0.013532	0.00663795	0.0150405	0.010063	0.379973	-0.67309	0.548637	-1.55972		+	+	+	0.0794284	0.0188913	0.0271361	0.0126814	-1.05306	0.168663	-1.93969
DMKJLJHC_01234 30S ribosomal protein S1	MLAARLHQERALAQSDSAPVQARIAQTIATDIAARPAQVTAAIGLLDGGATVPFVARYRKEVTGGLDDTQLRLLSDRLGYLREMEARRETILNSIREQGKLTDDLALAIGRAESKAALEDIYLPFKPKRRTKAMIARENGLEPLCRAIQDDRSAAPEVLAAGYITEAVPTAKDALQGARDILTEELSENADLLGALRDFMRAEAIITARVVPGKEEAGAKFSDYFDHREKWADIPGHRALAILRAAKEEIVTMEIAPDPETGEDRAISKISATLDTQAGRPGDLWLRDVARWAWRVKFSVSLYIDLLGELRQRAHEEAIKVFARNLHDLLLAAPAGSRATLGLDPGIRTGVKAAVVDATGKLLETATLYPFKPKMDLRGAEAKIIEMVKRHGVELIAIG…	K06959	tex; protein Tex		22.9348	22.7878	22.8676	22.5025	21.9981	22.1119	21.9166	19.5084	22.0509	22.1831	22.3583	22.1613	21.8939	21.6912	22.4693	22.8634	22.2042	21.1586	22.2342	22.0181	0.0600748	0.216031	1.16819	0.0881635	0.329571	0.0086013	0.00597499	0.00294623	0.00603276	0.0149829	-0.659217	-1.70478	-0.629153	-0.84529	+		+	+	0.0141716	0.108319	0.00112971	0.0234091	-1.04557	0.0300633	-0.186073
DMKJLJHC_01247 Lon protease	MTDNTPVTHPVLPLRDIVVFPHMIVPLFVGREKSVRALEEVMSEDRQILLASQMDPAEDDPETDGIYRVGVLANVLQLLKLPDGTVKVLVEGKSRVKITQFVHNDSYFEAEADPLFELPGDEASVRALLNTVGDEFQRYAKIKKNIPEEALVAVGEAVDADKLADLVSGHLGLEVEQKQDLLETLDVAQRLEKVYGLMQGEVSVLQVEKKIKSRVKTQMEKTQREYYLNEQMKAIQKELGDGEDGQNEIAELEARIEATKLSKEARDKADAEMKKLKSMSPMSAEATVVRNYLDWMLSIPWGTKSRVKKDLLKAEAVLDADHYGLEKVKERIVEYLAVQARSAKLKGPIMCLVGPPGVGKTSLGRSVARATGREFIRISLGGVRDESEIRGHRRTYIGS…	K01338	lon; ATP-dependent Lon protease [EC:3.4.21.53]		24.4485	24.3589	24.3211	24.7517	24.4772	24.729	25.0183	25.0766	24.9714	24.5707	24.4867	24.7251	21.7796	21.3356	21.3598	24.3761	24.6526	25.0221	24.5942	21.4917	0.0534204	0.124382	0.0430652	0.0987461	0.203838	0.0245441	0.0326135	0.0428833	0.0309694	0.010402	0.276493	0.64594	0.21805	-2.88449	+	+		+	0.0446269	0.000184034	0.0515501	4.19728e-05	0.369447	-0.0584433	-3.16098
DMKJLJHC_01248 hypothetical protein	MAKATTAKKKPVALKTQDDQPAPASVPELTPAETGEAPDTKLVLRKKTFVERVMVEGGLKKSEARGAMDAVLKVLGEALSEGEEMQIPPLGKLKVNRQFEKNGDEILVVKLRRPSGMLADVAADEKTDTSPLAEDED				21.4714	22.0866	22.345	22.1214	22.0836	22.4121	20.2041	22.2271	21.6333	22.3569	22.5232	22.4572	21.5571	20.0025	21.9072	21.9677	22.2057	21.3548	22.4458	21.1556	0.366454	0.146751	0.84904	0.0683913	0.827797	0.00462296	0.0059812	0.00337548	0.00698535	0.00824064	0.23802	-0.612823	0.478097	-0.81204					0.44186	0.401721	0.143919	0.273402	-0.850843	0.240077	-1.05006
DMKJLJHC_01251 Putative quercetin 2,3-dioxygenase	MSWNPALDPDIPIGDAVDAIETVIAPRARDIGGFEVRRALPSAARQMIGPFIFFDQIGPVEFLSGSRGIDIRPHPHIGLATVTYLLKGRLHHRDSLGTNQWITPGAVNWMSAGYGITHSERTDGKVRETGQDLFGVQTWVALPEDQEEGQARFEHVGAEALPLLEGEGKQVRLVLGDAWGARAPLKLPSEMFYADATLEAGAKLPLPDNHEDRGVYVLNGAVTVAGETYETGQMLVFRPGDRISLTAGPQGARVTILGGATMNGPRYIWWNFVASSRDKLDAAKEAWRAGDWAHGRFRLPPDDDAEFIPAPER	K06911	uncharacterized protein		20.2417	21.2404	21.9226	20.038	21.2008	20.1845	22.4411	22.6846	22.5492	21.212	21.4337	21.0413	22.4992	22.0816	22.4183	21.1349	20.4744	22.5583	21.229	22.333	0.690299	0.51707	0.0996389	0.160684	0.180824	0.0025956	0.00180149	0.00777341	0.00300543	0.0186378	-0.660477	1.42338	0.0940867	1.19812		+			0.339733	0.044735	0.860222	0.0764483	2.08386	0.754563	1.85859
DMKJLJHC_01254 Gamma-glutamyl phosphate reductase	MKDELDAKTLIDKLGTQARAAATGLSVASAERKDAALIGAAEAILARRAEILTANGEDMAYGASKGLSPAMMDRLMLDEARLSAIADSLRAVAGQTDPVGDVIAAWDMPSGLHIERVRTPLGVIGVIYESRPNVTADAGALCLKSGNAVILRGGSESYHSSRAIHACLVEGLRGAGLPENAIQLVPTRDRSAVTEMLRATAYIDVIVPRGGKGLVGLVQREARVPVFAHLEGICHVYLDAEADPAMAVEIALNAKTRRTGICGSMECLLLDRAFYARHGAAVIEALVAAGVEMRVEGELSEIAGTVPAKPEDFGREFLDMICAARLVDGLEGAIAHIQTYGSQHTDAIVTEDAAVAAQFFARLDSAILMHNASTQFADGGEFGMGAEIGIATGKMHARG…	K00147	proA; glutamate-5-semialdehyde dehydrogenase [EC:1.2.1.41]		24.5877	24.6888	24.6602	24.5988	24.6138	24.523	24.6944	24.7593	24.6623	24.5019	24.6147	24.5255	24.841	22.7203	21.9912	24.6456	24.5785	24.7054	24.5474	23.1842	0.0425421	0.0397727	0.0403584	0.0485798	1.20879	0.0295836	0.0309804	0.0344303	0.02998	0.0336209	-0.0670433	0.05978	-0.0982167	-1.46142					0.178849	0.222836	0.0978713	0.162686	0.126823	-0.0311733	-1.39438
DMKJLJHC_01258 hypothetical protein	MSWIEAEPPVTQIGAVGWARVLWRGLMLGSVTFGGLIILLLIRLIEAPKHGMRRPWTPHITRFVCRMAFPILGIEYKVTGLPMTQIGAVVANHGSWLDIFALNACQSVYFVSKAEVARWPFIGWLARATGTVFIRRARSEAKAQQKIFEERIRAGHHLLFFPEGTSTDARRVLPFKPTLFEAFFSHGLDRIMQIQPVTVIYRPPEGEDPRFYGWWGDMAFGPHLLKVLAQKHQGGVEVVFHRPVNVSDFDSRKGLAAAAESAVRAGLPYEIARAR	K22617	olsA; lyso-ornithine lipid O-acyltransferase [EC:2.3.1.270]		19.88	20.1705	20.4916	19.2983	20.1607	20.0318	20.3559	20.7191	20.9985	19.4648	19.9218	18.9775	22.484	21.1502	21.2417	20.1807	19.8303	20.6912	19.4547	21.6253	0.249793	0.379836	0.263085	0.385583	0.608334	0.00133964	0.00115273	0.00213085	0.000878602	0.0114114	-0.35039	0.510483	-0.72598	1.44458				+	0.336978	0.117451	0.0891413	0.0359915	0.860873	-0.37559	1.79497
DMKJLJHC_01261 Trk system potassium uptake protein TrkA	MKVIICGAGQVGWQIARHLAGERNDVTVVDSNPDLVRRAADTLDVQGVVGFASHPDVLERAGARDCDLMIAATHSDEVNMVTCQVAMSVFGVTRKIARIRAQAYLQPEYADLYRRDHLPIDVVISPEREVAEAALQRLAAPSTFDTESFLDGDLQLLGIELDPECPVLETPLRQLTDLFSTLRALVVGIRREGRLFAPEPGDQLFAGDQIYVFSHVEDTARTLDIFGKSTRKQERIVIIGGGNVGLGVARALEARSDRVRAKIIEGRREQAEAAADALDRTIVLNGDGMSSELLEEANIGNADAVLAVTDDDKTNILVSVRAKQAGCRMAICLINDPTLAPLLSALDIDAYINPRATTVSSILRHIRHGRVRAIYSIGDAEAEVIEAQVMGTSPMSGKM…	K03499	trkA; trk system potassium uptake protein		25.4976	25.5211	25.4591	25.7066	25.8205	25.8016	25.745	25.4987	25.7661	25.8574	25.6188	25.7243	25.9108	22.0534	24.6013	25.4926	25.7762	25.67	25.7335	24.1885	0.0255372	0.0498162	0.121412	0.0976371	1.60161	0.0532143	0.0710605	0.0671919	0.068217	0.0674436	0.283637	0.177373	0.2409	-1.30411	+		+		0.00200816	0.113264	0.0278953	0.313718	-0.106263	-0.0427367	-1.58775
DMKJLJHC_01263 RNA-binding protein Hfq	MAGDKQNLQDAFLNHVRKTKVPVTIFLINGVKLQGVITWFDNFCVLLRRDGQSQLVYKHAISTIMPGQPISLYEGDD	K03666	hfq; host factor-I protein		23.9966	23.9982	23.7077	22.4845	23.3113	22.6027	22.8849	22.3617	22.7996	23.3361	22.0031	22.8843	22.0016	22.863	20.9111	23.9008	22.7995	22.6821	22.7412	21.9252	0.136579	0.365115	0.229205	0.5535	0.798657	0.0176546	0.00902708	0.0084698	0.00857263	0.0140487	-1.10131	-1.21875	-1.15965	-1.97559	+	+	+	+	0.0161923	0.0029572	0.045164	0.0260976	-0.117433	-0.05834	-0.874273
DMKJLJHC_01264 GTPase HflX	MKATTERPALSELHVSERAPTRAYVLHPDIPSREGPRHLPKFALAEAEALAHALPGLEVVGGQVVRLPKPHPGHLFGTGKMAELKTQLEADEIELVLIDGPVSPVQQRNLEKEWGVKLLDRTGLILEIFADRARTREGVLQVELAALSYQRTRLVRAWTHLERQRGGLGFVGGPGETQIEADRRAIDDQMVRLRRQLARVVKTRELHRAARRKIPFPIVALVGYTNAGKSTLFNKVTGAEVFAQDMLFATLDPTMRGLTLPSGRKVILSDTVGFISDLPHELVAAFRATLEEVLEADLILHVRDISHPETEEQAQDVNDILGTLGVDEDVVLLEVWNKIDAMAEEPRAALQVQAGREPDIEAVSALSGAGLDGLLSAIDGRLAEEKLFETLDVPFSDGR…	K03665	hflX; GTPase		24.9497	24.859	24.8589	24.7288	24.5353	24.7357	24.4742	24.0915	24.418	24.69	24.5648	24.8876	21.8907	21.783	21.834	24.8892	24.6666	24.3279	24.7141	21.8359	0.042747	0.0928968	0.168711	0.132887	0.043981	0.0350264	0.0329304	0.0265042	0.0336534	0.0132052	-0.22262	-0.561323	-0.175107	-3.05331	+	+		+	0.0369768	0.0103299	0.150734	2.43879e-07	-0.338703	0.0475133	-2.83069
DMKJLJHC_01265 Acyl-homoserine lactone acylase QuiP	MYKAFRWGVRLIMAVLVGIVLAGGLVWYFASRSLPDYNATYKVEGLQAPVEIVRTTEDVPHIFSKDDPDAFFALGLAHAQDRLWQMMLMRRTVQGRLSEMFGARTLKTDELMRRLGLYDAAVSSVAAQDDYTKKALEAYARGVNQWIEIVNKGAMGRGAPEFFLFNSKISYWTPADSIAIMKLMALQLTSQLQDEVLRARVSMLGHGWVNDLMPDDTDQATATLPSYASLFPSVPRQTEVADGGEGMLSPVPARGMAGASNAWAAAPDRSAAGGSLLANDPHLGLTAPSVWYLARLQLQSGGVIGGTIPGMPLVLSGRNKDLGWGLTTAYVDDQDLYIEQLDPKDPTQYRTPDGYKKFRSRRVIINVKDAKPVTITLRWTDNGPVIPGSHFDLATVTPP…	K01434	E3.5.1.11; penicillin amidase [EC:3.5.1.11]		24.285	24.2576	23.8942	23.8366	23.9136	23.6309	23.3077	22.8268	23.2914	23.4013	23.4512	23.6483	22.6205	21.4114	21.9594	24.1456	23.7937	23.142	23.5003	21.9971	0.178103	0.119335	0.222968	0.106642	0.494317	0.020919	0.0179818	0.0116496	0.014509	0.0147661	-0.35188	-1.00364	-0.645287	-2.14851		+	+	+	0.0810304	0.00763109	0.0117272	0.00444231	-0.651757	-0.293407	-1.79663
DMKJLJHC_01266 2-hydroxy-3-oxopropionate reductase	MAKLAFLGLGVMGYPMAGHLQAAGHDVTVYNRTAAKAEDWVKAHGGSSAATPREAAKGADFVMSCVGNDDDLREICLGKDGAFKGMKTGAIFVDHTTVSAAVTRELAEEAGGHGVAFVDAPISGGQAGAENGQLSVMCGGAQADYDKAEPVIAAYAKICRRIGETGAGQVTKMCNQIAIAGIVQGLSESLNFAEKAGLDIASVVEVISQGAAGSWQMANRSKTMAEGEFEHGFAVDWMRKDLAICLQTGDEIGASLPVTALVDQFYKDVQSMGGNRWDTSALIARLRRFD	K00020	mmsB; 3-hydroxyisobutyrate dehydrogenase [EC:1.1.1.31]		22.9908	23.2859	23.078	23.1615	23.4749	23.3249	23.7069	23.782	23.554	23.2508	23.25	23.1313	24.4469	21.2907	20.6502	23.1182	23.3204	23.681	23.2107	22.1293	0.123793	0.127995	0.0948494	0.0561428	1.65954	0.0102628	0.0129527	0.0169268	0.0118701	0.0161829	0.20223	0.562777	0.0924833	-0.988933		+			0.183521	0.00696612	0.390437	0.44798	0.360547	-0.109747	-1.19116
DMKJLJHC_01269 Single-stranded DNA-binding protein	MAGSVNKVILIGNLGRDPEVRTFSNGGKVCNLRIATSETWRDRNSGERKERTEWHSVAIFSEPLAKVAEQYLRKGSKVYIEGQLETRKWQDQSGQDRYSTEVVLRPFRSELTMLDGRDGGGSGGGGGSAPGGYGGPSSGGYDDGGGYGGPSGGSQGGSSSGGGGRSDFDDEIPF	K03111	ssb; single-strand DNA-binding protein		25.4775	25.9383	25.8689	23.9823	24.4999	24.2807	23.9882	23.9959	23.9762	23.9254	23.7405	23.8001	22.0662	21.2293	22.2883	25.7616	24.2543	23.9868	23.822	21.8613	0.202858	0.212117	0.00810581	0.0770805	0.455994	0.0641202	0.0247447	0.020923	0.0181331	0.0134394	-1.50726	-1.77479	-1.93957	-3.90029	+	+	+	+	0.00190902	0.000246011	0.000225566	0.00038111	-0.267527	-0.43231	-2.39303
DMKJLJHC_01274 hypothetical protein	MISRRSLLALGGAGLTLAACGNGIGNTGAAQLDARVDATRNFLLNKYPGTRDLETKSVGVLWMPLMTEAGFGVGGSYGRGALRINNVTVDYYSAASASVGFQIGAQQYAHALFFMTPEALSAFRRSDGWEMGADARYALPDRGGAINASTLTSTDPVIALVFGQAGLIAGASLAGVKYTRIIP				24.4081	24.1166	23.9013	23.7255	23.6883	23.6982	23.8479	23.8761	23.8578	23.5112	23.9424	23.8446	21.1691	21.5259	21.8563	24.142	23.704	23.8606	23.7661	21.5171	0.207664	0.0157275	0.0117179	0.184587	0.280597	0.0208669	0.0168972	0.0191712	0.017444	0.0105872	-0.438023	-0.28137	-0.375897	-2.62487	+			+	0.0409625	0.128284	0.128256	0.000442789	0.156653	0.0621267	-2.18684
DMKJLJHC_01275 Delta-aminolevulinic acid dehydratase	MTPILPPFPHTRLRRMRRTAALRDLAQENRLSVKDLIWPIFVTDVAGADVEVPSLPGVTRYTLEGAVRAAEHAAQLGIPAICLFPYTDPAVKTERCEEAWNPDNITNRVIRAIKAEVPEIAVMTDIALDPYNANGHDGLVRDGIILNDETVECLVKMALAQADAGADILGPSDMMDGRIGAMRTALEGAGHNDVTILSYAAKFASCFYSPFRDAVGATGALKGDKKTYQMNPGNSDEALRLVARDLAEGADMVMVKPGMPYLDICHRVKERFGVPTYAYQVSGEYAMAMAAVQNGWLDHDKVMLESLMAFRRAGCDGVLTYFAPAAAKLLRES	K01698	hemB; porphobilinogen synthase [EC:4.2.1.24]		23.5637	23.5525	23.595	23.1934	23.6006	23.3668	23.3986	23.3088	23.4237	23.4135	23.4996	23.2952	21.7908	20.7525	20.9153	23.5704	23.3869	23.377	23.4028	21.1528	0.0179936	0.166863	0.0493028	0.0838079	0.455941	0.014041	0.0135636	0.0137112	0.0135604	0.00822477	-0.1835	-0.193387	-0.167663	-2.41758		+		+	0.196943	0.00646739	0.0505278	0.00169695	-0.00988667	0.0158367	-2.23408
DMKJLJHC_01276 hypothetical protein	MEIFRIIADLIDLRSFSNLWYWIAVAVVWSSASHWVLGVPWDMVGRARRKGGRATSDLVALAEINARRLDTIWSEAGLVISIMFPFALSFLAVTGFVYGAEFSQALFLFALPLSAVFALSVSLSRRLSAQFERSSLAPEAVIAALARHRVWIQLIGVVAIVVTSFWGMFQNLRYAAFL				20.3059	20.9613	20.2459	19.6133	19.8678	20.6027	19.989	20.3733	19.9883	20.0759	18.6171	19.8357	21.1345	21.2592	21.3165	20.5044	20.0279	20.1169	19.5095	21.2367	0.324065	0.419491	0.181314	0.638658	0.0759805	0.00167656	0.00132195	0.00143109	0.00091264	0.00871702	-0.476437	-0.38749	-0.994807	0.73235				+	0.272587	0.214055	0.120939	0.0358172	0.0889467	-0.51837	1.20879
DMKJLJHC_01277 Transcription-repair-coupling factor	MDHFVLSGAPEGYDAALIARELAKGQPVIHVARDDRRLAALRAALGFFAPEALILDFPAWDCLPYDRVSPNPDISATRMATLAALAAGVPGPFILLTTVSAAMQKVPARAVLEGASFTARVGQRIDERALRDFLVRMGFSQSSTVSEPGDYALRGGIIDIYPPGEGGPVRLDLFGDVLDDARGFDPITQRTTEKLPGVELAPVSEVILDEPSIARFRQNYRVEFGTGGAEDPLYEAVSAGRKQAGMEHWLGFFHDRLETLFDYLPDATVMLDDQTVAAQESRWIGIADQYDTRREAMTRRDRLDSVYKPAPPALLYLDPTAWEASLKPRRVLRLQVISAPPGPGVLDAGGRVGRNFSPERQIENISLFSTLKDHVQARLGKGPVVIASWSEGARERLKG…	K03723	mfd; transcription-repair coupling factor (superfamily II helicase) [EC:3.6.4.-]		24.1824	24.1724	24.0679	23.7132	23.9509	23.881	23.6898	23.4529	23.6633	23.8651	23.8115	23.7814	22.125	21.6184	21.8487	24.1409	23.8484	23.602	23.8193	21.864	0.0517693	0.0997329	0.105989	0.0346076	0.207091	0.0208512	0.0186763	0.0160248	0.0180994	0.0134653	-0.29252	-0.538927	-0.32161	-2.27686	+	+	+	+	0.0211759	0.00295466	0.00186861	0.000112571	-0.246407	-0.02909	-1.98434
DMKJLJHC_01278 Fumarate hydratase class II	MTATRTETDSFGPLDVPADKYWGAQTQRSIINFPIGWERQPVPIIRALGVIKKACAQANKAQGTMDAKIADAIIAAATEVIDGKFDDNFPLVVWQTGSGTQSNMNANEVISNRAIEMLGGKMGSKDPVHPNDHCNMGQSSNDTFPTAMHVGIAMQARDGLLPGLRKLHAALEAKSEEFKDIIKIGRTHTQDATPLTLGQEFSGYAHQVKKGIERVESALGDIYELAQGGTAVGTGLNTRKGWAEAVAANMAEITGLPFVTAPNKFEALAGHDAMVMFSGALKTVAASLFKIANDIRYLGSGPRSGLGELLLPENEPGSSIMPGKVNPTQAEALTMVCAHVMGNDAAVGFAGSQGAFELNVYNPMMSYNVLQSMQLLGDSASAFTDNMVSGIEANKPRIE…	K01679	E4.2.1.2B; fumarate hydratase, class II [EC:4.2.1.2]		27.9343	27.9915	27.766	27.8767	27.8564	27.8575	27.8141	27.8371	27.7725	27.8482	27.8867	27.852	27.6105	21.711	27.3896	27.8973	27.8635	27.8079	27.8623	25.5704	0.0956811	0.00933114	0.0267618	0.0173331	2.73047	0.28178	0.301976	0.295734	0.29836	0.175764	-0.0337367	-0.0893733	-0.0349367	-2.32691					0.645724	0.272243	0.638115	0.294807	-0.0556367	-0.0012	-2.29317
DMKJLJHC_01285 ADP-ribose pyrophosphatase	MIQHFFYGTLCHPPLLAAVIGRVPEMRRASLTGFAAREACAEGGGLGFPILVPEAGITTRGLLCQLSDKEAEAISWYEWGYRAEQMDVVGPKGLEPARVWHPESGHWEVGDLWTLDDWMPRWGALKTEGAREFIREARQIGPEAANRRYGSILLRAASKINAQTAPLPETLRRKATPDDVKIEAQDIGYHGFFLVEDYRLRHRLFDGGQSEPLERAVFVSGDAAVVLPYDPARDRVLLIEQFRPGPMARGEPNPWLIEAIAGRVDPGEPPETTARREALEEAGITLAELIKAPRFYASPGAKTEFIHCYIGVTDLPDEAGSPGGLASEGEDIRPHLVPFSRLMEMVESGEAGNAPLVVLALWLAQNRAQLRAKA				21.4537	21.4255	21.45	21.892	21.9081	21.7624	21.435	21.6285	21.7873	21.8909	21.5874	21.5614	21.6217	23.3952	21.7558	21.4431	21.8541	21.6169	21.6799	22.2576	0.0125001	0.065233	0.144063	0.149573	0.806256	0.00321366	0.00468772	0.00404789	0.00410808	0.017688	0.41107	0.173853	0.23683	0.8145	+				0.000939161	0.164304	0.0894673	0.226343	-0.237217	-0.17424	0.40343
DMKJLJHC_01286 Cysteine synthase	MRLFSDLAAAVGHTPLIKLRQASEATGCTILGKAEFLNPGQSVKDRAALFIIRDAIQRGTLRPGGTIVEGTAGNTGIGLALVGASMGFRSVIVIPETQSQEKKDMLRLAGAELVEVPAAPYKNPNNFVRYSERLAIALNESDPNGAIWANQFDNTANRQAHIETTGPEIWEQTGGKVDGFTCAVGSGGTLAGIGLYLQPKGVKIALADPDGAALHSFYTTGELKSEGSSIAEGIGQGRITANLEGFTPDMSFNIPDSEALPIVFDLLAHEGLCLGASSGVNVAGAIRMANEMGPGHTIVTVLCDYGQRYQSKLFNPAFLREKGLPVPEWLDGPGRSVPDVFAQ	K01738	cysK; cysteine synthase [EC:2.5.1.47]		25.3164	25.7241	25.7101	25.5103	25.7882	25.772	26.0223	26.1387	26.1743	25.2915	25.6227	25.5726	23.7502	21.1607	22.9588	25.5835	25.6902	26.1118	25.4956	22.6232	0.188971	0.127333	0.0649049	0.145755	1.08349	0.0566757	0.0669455	0.0912674	0.0578459	0.0227905	0.10666	0.52827	-0.0879333	-2.96027		+		+	0.544186	0.0201377	0.629829	0.0189986	0.42161	-0.194593	-3.06693
DMKJLJHC_01287 putative MscS family protein.1	MIWRLARLCLVLLMLALPGLALAQSGGQPDTPDYNAWEKIASSAETQVQDGTINGTALDDLRSSITDWRQKFQAAEGVNSAQIDTVKAQINGLGPPPKEGETEDKAIATRRSQLNDELSTLQAPVIRAKEAESRADAIVANIDKLIRSRQTDKLLRLTPTPLNPVNWPAAVAVASKIGGALNDELTQRLQGDAPYATLREQAPVIVGLLVLALILMIRGRIWIEKLALVLETRLADRARRVIDALVSLGQLALPLLGVVLFLTALRQTALTGPLLDELLLSFGIASAVAITAVWLAGRVFPKSELQQAPFNLISDRRREGRILTITLGSLVALDGPLGYWLQTKGEQIMDAATTTSAQTDALARTLDAGFGVLSFPLQVLAGIALFRLGQLLRDHLRHE…	K05802	mscK; potassium-dependent mechanosensitive channel		23.9371	23.7965	23.9283	24.1456	23.892	24.1689	24.0393	24.143	24.2986	24.1214	23.9863	24.1033	21.9135	21.3654	21.7674	23.8873	24.0688	24.1603	24.0704	21.6821	0.0642997	0.12541	0.106545	0.0598687	0.231748	0.0174899	0.0217597	0.0235974	0.0215397	0.01187	0.181543	0.273007	0.18306	-2.20518		+	+	+	0.142591	0.036133	0.0421073	0.000204063	0.0914633	0.00151667	-2.38673
DMKJLJHC_01290 hypothetical protein	MSNNRQAAETSRLRAPLFFAIMTALIVLEGVTSGWNSALGILNMGLISAIMALGVNMQWGYAGLFNAGAMGFVALGGLAPVLISMPPTQGAFKAGGFGLIVAFIIAAVAVLAAVWLYKRLHGLARGLAVAAVLIVGFFAYRFFLDPAVSAIEAINPSAAGNLGGLGLPTLISWPVGAILAAGAAWLVGKTALGLRSDYLAIATLGIAEILVAVLKNEQWLDRGVLNVNGIPRPWPVPYEINLQNSQAFVAQMQAWGIDPTLGSTITVKLAFLVLFVVVILVLLWLTEMSLRSPWGRMMRAIRDNEISAAAMGKNITRRHLQIFVLGSAVIGLAGAMMISLDGQMTPSSYNPLRYTFLILVMVIVGGSGSNWGAILGGVLIWYVWVKAGDWGPDIMGLLA…	K01998	livM; branched-chain amino acid transport system permease protein		19.8121	19.4617	19.563	20.1204	21.9742	21.5146	20.8777	20.5877	20.5336	20.8858	21.6243	21.2049	20.8665	21.2775	22.8873	19.6123	21.2031	20.6663	21.2383	21.6771	0.147204	0.788214	0.151105	0.302384	0.872021	0.000903382	0.00298521	0.00209443	0.00302494	0.0118289	1.59083	1.05405	1.62608	2.06486	+	+	+	+	0.0485264	0.0021161	0.00239315	0.0298774	-0.53678	0.0352533	0.474033
DMKJLJHC_01291 High-affinity branched-chain amino acid transport system permease protein LivH	MDIINALVAVTNYVIIPATAYGAQLALGALGVTLIYSILRFSNFAHGDTMAFGTGVTILITWGFQAMGISFGPLPTALLALPFGIVITSALMLGTDRVVYRYYRRVRAAPVVMVMVSVGVMFVMNALTRFLIGVDQINFDDGARFIINARQWREMTGLTEPLTLRSTQVITVVTAVIVVAALFWFLGRTRTGKSMRAFSDNEDLALLSGIDPNKVVAVTWIITGALATIAGTLYGLDKSFKAFTYFQLLLPIFASAIVGGIGNPVGAIAGGFVISFSEVGLTYAWKKVVTYLIPNWEPDGLVQLLSTDYKYAVSFTILILVLIFKPTGLFKGKIV	K01997	livH; branched-chain amino acid transport system permease protein		20.7848	21.4223	21.4681	20.5311	21.1839	18.7679	21.1857	20.6526	20.7938	18.5716	22.2292	20.5891	22.3925	22.8269	21.8657	21.225	20.161	20.8774	20.4633	22.3617	0.311881	1.02045	0.225519	1.49588	0.393032	0.00276293	0.00144966	0.00242437	0.00176769	0.0190116	-1.06408	-0.347687	-0.761747	1.13663				+	0.231273	0.270513	0.519697	0.0327843	0.71639	0.30233	2.20071
DMKJLJHC_01292 High-affinity branched-chain amino acid transport ATP-binding protein LivF	MSYLSATNMTGGYGKADILHDCTLTVDKGQIAVIVGPNGAGKSTAMKAVFGMLGLRAGQVTLDGTDISALSPQDRVKKGMGFVPQVNNVFPTMTVEENLEMGAFIRNDNYRVTMEQVFDLFPILKDKRRQNAGELSGGQRQQVAVGRALMTQPKLLMLDEPTAGVSPIVMDELFDRIIEVARTGISILMVEQNARQALEIADKGYVLVQGANKYTDTGQALLADPDVRRTFLGG	K01996	livF; branched-chain amino acid transport system ATP-binding protein		23.0759	23.2894	23.5883	24.0423	23.965	24.1992	23.9544	23.8654	23.8066	23.6895	24.1619	24.1102	22.1136	20.9506	21.1772	23.3179	24.0688	23.8755	23.9872	21.4138	0.210145	0.0974253	0.0607623	0.21159	0.503425	0.0117862	0.0217598	0.0193695	0.0203332	0.00985552	0.750973	0.55759	0.669323	-1.90407	+	+	+	+	0.0101446	0.0226619	0.0337243	0.00783867	-0.193383	-0.08165	-2.65504
DMKJLJHC_01293 Lipopolysaccharide export system ATP-binding protein LptB	MIRVENLVKSFGGFHAVDGASLEIETGSITGLIGPNGAGKSTLFNVIAGVHEPTEGRVTMDGEDITGLKPHALFHKGLLRTFQIAHEFPSLTVRENLMMVPAAQTGETLWNTWFGRKQIQKEEAALLEKADDVLDFLTISHLRDEKAGNLSGGQKKLLELGRTMMVEAKIVFLDEVGAGVNRTLLNTIGDAIVRLNKERGYTFCVIEHDMDFIGRLCDPVIVMAEGRVLAKGSADHIMENEAVIEAYLGTGLKNKVKGEESREALAHEDHGAQPGLGDEAGQSGDEGDQE	K01995	livG; branched-chain amino acid transport system ATP-binding protein		23.0229	23.2588	23.5048	23.8635	23.7298	23.7255	23.7224	23.528	23.7314	23.5931	23.4616	23.5812	21.7119	22.4995	21.6806	23.2622	23.7729	23.6606	23.5453	21.964	0.196757	0.0640816	0.0938239	0.0593584	0.37888	0.0113399	0.0177247	0.0166895	0.0149687	0.0144314	0.510757	0.398433	0.28312	-1.29818	+			+	0.025108	0.0610091	0.123208	0.0126426	-0.112323	-0.227637	-1.80893
DMKJLJHC_01294 Leu/Ile/Val-binding protein	MKKILLASAAIALGASGAYANDVKIGVLLGFTGPLESMAPNMDAGAELAIKEVSDSGKFMDGSTVTPVKGDSTCIDASAATAAGETLVTSDKVSGIVGAQCSGATTAVLQNVAMPNGVVMISPSATSPALSTLPDDGLFFRTAPSDARQGEVMADEVIEKGIKSVAVTYTNNDYGKGLADAFDKAYEAKGGKVTISAAHEDGKGDYSAEVASLASAGGDALVIVGYIDQGGSGILRGALDTGAFSKFVFPDGMVGKTLEDNFGSEINGSFGQLPDAKGQGMESFLADAKAAGFDGSSAYSASAYDAAALILLAMQDAKSTDPSVYKTKVMDVANGPGEKIYAGQLAKGLELLAEGKPIDYEGATSVNLIGNGEASGTFREIEIKDGKIETVKYR	K01999	livK; branched-chain amino acid transport system substrate-binding protein		28.1547	28.3043	28.1211	29.7597	29.625	29.6497	29.328	29.6699	29.3792	29.947	30.0177	29.8944	29.953	28.0791	29.3498	28.1933	29.6782	29.459	29.953	29.1273	0.0796553	0.0585387	0.150554	0.0505028	0.780996	0.345966	1.06225	0.928839	1.27088	2.06857	1.48482	1.2657	1.75971	0.93395	+	+	+		2.90369e-05	0.0004636	1.22609e-05	0.167772	-0.219123	0.274887	-0.55087
DMKJLJHC_01295 HTH-type transcriptional regulator CdhR	MSQSAHRQQRPAPSQGTIKLAAATRTRSFTFLLLERFTMMAFASAIEPLRLANQATGQKLYDWQLVGEAHRDVTCSNGAVFRTDMGLEELPRDSTVLVCGGIDVAETITKPILNWLRREARRGAAMGGLCTGTWALAEAGLLDGRRATIHWENTDAFCEDFPDVELTRSVFVIDGNRLSTAGGTASIDLMLRLIAADHGDELANTVADQMIHSSIRTDRDTQRLSIPTRIGVRHPKLAQVIGRMENNIEDPISPALLATEVGMSARQLERLFRRYLNRSPKRYYMELRLQKARNLLMQTEMSVINVAMACGFASPSHFSKCYRAHYQTTPYRERGTSGGTPEADRALE				20.9281	21.494	19.5855	21.8549	21.672	21.8609	21.602	21.908	21.5936	21.8202	21.8417	21.7934	23.0493	22.5981	21.2908	20.6692	21.7959	21.7012	21.8184	22.3127	0.800365	0.0876899	0.14626	0.0197504	0.745721	0.00187946	0.0045024	0.00429146	0.00452203	0.018377	1.12678	1.03205	1.14924	1.64354					0.118919	0.147283	0.112208	0.100803	-0.09473	0.0224567	0.516757
DMKJLJHC_01296 Phospho-2-dehydro-3-deoxyheptonate aldolase	MGKGWSKSDWRAKPRVQMPDYPDADALHTVEQTLSRMPPLVFAGESRRLKAELAQAARGEAFLLQGGDCAEAFGEFSADNIRDTFKVMLQMAVVLTWGAKVPVIKVGRMAGQFAKPRSAATETIGGVELPSYRGDIINGFDFTEAARLPDPNRMLQGYTQAAATLNLLRAFSTGGFADMHRVQSWIAGFTDAEEAEKYRQVAEQISEAMEFMRAAGITAETAHELGSVEFYTSHEALLLEYEEALCRIDSTTGLPVAGTGHMIWIGDRTRQPDGAHVEFCRGVQNPIGLKCGPTTTEDDLKVLMEKLNPENEAGRLTLIARFGAGKVGDHLPRLIRAVEAEGANVVWSCDAMHGNTIKSDSGYKTRPFDSVLREVREFFAIHKAEGTIPGGVHFEMTGQ…	K01626	E2.5.1.54; 3-deoxy-7-phosphoheptulonate synthase [EC:2.5.1.54]		26.357	26.4902	26.2885	25.4698	25.5797	25.3584	25.5031	25.6501	25.4441	25.5267	25.4663	25.5875	25.072	21.8554	22.949	26.3786	25.4693	25.5324	25.5268	23.2921	0.0837422	0.090342	0.0866192	0.0494593	1.33541	0.0983408	0.057443	0.0610824	0.0591128	0.0362339	-0.909257	-0.846133	-0.851737	-3.08643	+	+	+	+	0.000475835	0.00057705	0.000244295	0.0310181	0.0631233	0.05752	-2.17717
DMKJLJHC_01297 Oligo-1,6-glucosidase	MNTEWWRGAVIYQIYPRSFQDDSGDGIGDLKGITRRLDHVASLGVDAIWLSPIFTSPMADMGYDVSDYRDIDPQFGTLADFDALVARAHELGLKVVIDQVLSHSSDKHPYFQQSRKSKTGEKADWYVWADPKPDGTPPTNWQSNFGGSSWEYAPERRQYYLHNFLIEQPDFNLHNPDVQDELLDVLRFWLDRGVDGFRLDTVNYYFHDPELRDNPPMPADPAGWPPVATYDMQDHEYDKNRPENLAFLQRMRAVMDAYDARMLIGEVGEVPHRALGIMEEYTRGDDRLHMAYSFDMLGPKFTPEHFRSRIEGFFTNAPDGWPSWSFSNHDVQRHVTRWKNYGTQDAVAKLAISMLASFQGTIGIYQGEELGLSETELEYSELTDPPGLRFWPENKGRDG…	K01187	malZ; alpha-glucosidase [EC:3.2.1.20]		28.1858	28.2037	28.1678	26.8592	27.0619	26.8858	27.3525	27.3004	27.4011	26.8287	26.8801	26.9061	27.0132	25.34	26.6822	28.1858	26.9356	27.3513	26.8716	26.3451	0.0146602	0.0899297	0.0410908	0.0321606	0.723456	0.34416	0.158724	0.215507	0.150142	0.300716	-1.25015	-0.834443	-1.31417	-1.84066	+	+	+	+	4.15892e-05	1.11073e-05	7.82936e-07	0.0228113	0.41571	-0.0640133	-0.590503
DMKJLJHC_01298 Maltodextrin phosphorylase	MKDTHLPTVQVLRDEIEHHLTYSMGKDARHASVYDWRMALSLAIRDRVVAPWFAATRKTWETGAKRVYYLSMEFLIGRMLEDAAINLGIRDTCREALEALGLDYEAVVENEPDAALGNGGLGRLAACYMESMASLGCPGYGYGIRYEHGLFKQKFEAGRQVELPEDWLRQRHPWEFERPESVYEIDFKGTVETVDGKSVWTPGETVLAEACDMPIVGWEGKWANTLRLWSAKPTEQFDLARFNHGDYAAAAEPEALARTLSRVLYPDDTTYAGKELRLKQEFFLTSAALQDILRRHLAADLALEDLPDHVAIQMNDTHPAIAGPELVRLLMDVHGMEFEAAIDITVKCLGYTNHTLLPEALERWATYLMGTVLPRHMQIIEKIDSWHRAAHPKRPDYVG…	K00688	PYG; glycogen phosphorylase [EC:2.4.1.1]		24.2743	24.4873	24.4864	23.6118	23.2664	23.3088	23.271	22.7277	23.218	23.3684	23.417	23.3809	22.5826	20.8826	22.1984	24.416	23.3957	23.0722	23.3888	21.8879	0.100202	0.153786	0.244584	0.0206097	0.727938	0.0252311	0.0136462	0.0110998	0.0134295	0.0136895	-1.0203	-1.34377	-1.02722	-2.52811	+	+	+	+	0.00141495	0.00198263	0.000142796	0.00824557	-0.32347	-0.00692	-1.50781
DMKJLJHC_01299 1,4-alpha-glucan branching enzyme GlgB	MALIDRATAEALTEGLHADPFSVLGLHETRLVAFVPGAAQVWAVGARDEVELAEIIPGLFGANWSGGAYRLRASNAHATWDFDDPYGFGPVLGPMDEYLIGEGTHKRLWEKLGAHVITHEEVDGVHFAVWAPNARRVSVVGDFNFWDGRRHQMRRIGETGAWEIFVPGLHAGALYKYELLDAQGRLLPLKADPLGFGAEHPPAQASVVRKLGQHHFGDASWIKHRAARHDRHAPISIYEVHLGSWVRIWDEGGRPLSYHELAEKLIDYVCDLGFTHIELLPITEFPFDGSWGYQPIGLYAPTIRHGRPEEFAELVDAAHRRGIGVILDWVPGHFPTDAHGLQRFDGTALYEHADPKEGFHQDWNTLIYNYGRREVANYLLANALFWLEEYHLDGLRVDA…	K00700	GBE1; 1,4-alpha-glucan branching enzyme [EC:2.4.1.18]		23.4456	23.3791	23.5672	23.5477	23.6119	23.4831	22.8241	20.4815	23.1786	23.8291	24.0225	23.8698	22.5031	21.7715	21.8952	23.464	23.5476	22.1614	23.9071	22.0566	0.0778714	0.0525866	1.19667	0.0832621	0.319724	0.0130423	0.0151611	0.00590382	0.0192354	0.0153879	0.08358	-1.30258	0.44315	-1.40738			+	+	0.276845	0.199313	0.00533746	0.00376994	-1.38616	0.35957	-1.49096
DMKJLJHC_01300 Glucose-1-phosphate adenylyltransferase	MKPQPNTRLSAQAMAFVLAGGRGSRLMELTDRRAKPAVYFGGKTRIIDFALSNALNSGIRKMAIATQYKAHSLIRHVQRGWNFFRAERNEYLDILPASQRVADSRWYLGTADAVAQNIDIIDDYGVKFVIILAGDHIYKMDYEVMLQEHVTTGADVTIGCLTVPRAEAKAFGVMAVDAKGQVTEFLEKPKNPPGMPDDPENSLASMGIYVFDWAFLRDLLRRDMEDSNSSHDFGHDLIPDIVKNGRAMAHKFSDSCVTSGLETEPYWRDVGTVDAFWQANIDLTDFTPKLDLYDNAWPIWTYAEIVPPAKFIHDEDDRRGSAVSSLVSGDCIVSGSEVRHSLLFTGVRAHSFSALDQAVVLPYVDIGRHAKLSQCVIDRGVQIPAGLVVGEDPEEDEKW…	K00975	glgC; glucose-1-phosphate adenylyltransferase [EC:2.7.7.27]		26.1292	26.2332	26.1612	26.0352	26.535	26.2026	25.491	25.2142	25.7337	26.1457	26.1991	26.6633	23.2225	21.9517	23.5901	26.1745	26.2576	25.4796	26.336	22.9215	0.0434939	0.207735	0.21227	0.232441	0.701931	0.0853712	0.0992042	0.0588874	0.10358	0.028024	0.0830533	-0.69489	0.161507	-3.25307		+		+	0.609459	0.0105342	0.388804	0.00282242	-0.777943	0.0784533	-3.33612
DMKJLJHC_01301 Glycogen synthase 1	MKKVLSVASEAVPLIKTGGLADVVGALPGALAPLGWEMRVLIPAYRGVLKLLKSKKSVWQTPDLHGGEARLIEGRIAGLYVLALDAPHLYDREGGPYSDAAGDYRDNATRFAALCQVAAEIAREGVAGWRPDLVHAHDWQAGLVPWYLREEAIPTVLTIHNVAFQGRFARSTLEVMQLPEADFHRDRVEYWGDVSTLKAGLMGADAITTVSPRYAQELMRPEFGMGLEGVLQLRADRLHGILNGIDPELWSPESDPNIVSFSATRMQGKERNNKMLQEEFQLDVKGPLAILVSRLTDQKGIDLIAPAIEPFLDAGGGLVVLGSGDRRAEAAMLDLAARYPSQVGVRIGYDEALSHRMFAGGDAVLVPSRFEPCGLTQLYGLRYGCLPVVAAVGGLADTV…	K00703	glgA; starch synthase [EC:2.4.1.21]		23.7034	23.7193	23.4042	23.7353	23.8378	23.8383	23.5034	23.3001	23.4615	23.6872	23.8595	24.0008	22.011	20.7148	20.8923	23.609	23.8038	23.4216	23.8491	21.206	0.144934	0.0484231	0.0876567	0.128218	0.573802	0.0144211	0.0181078	0.0141419	0.0184777	0.00853361	0.19484	-0.187303	0.24019	-2.40293				+	0.145695	0.192893	0.154047	0.00455844	-0.382143	0.04535	-2.59777
DMKJLJHC_01302 Glycogen operon protein GlgX	MKIEAGQAGPLGATLSADGVNFAVTSEHAERIELCLFEGEHQHVLDLPRRSGPVWHGFVPGLREGARYGFRAHGPWAPEEGHRFNPAKLLIDPYARALDAPLVWQAAMAPGKTRPDPRDSGPVMPKSIVCAATHPDWQRPGHAWQDSVIYEAHPKGLTMEHPDIPEVLRGTWEALASDPILAHLNGLGVTAIELLPSCAFIDDKFLVEKGLRNYWGYQPVGFFAPEPRYCGSDPRGEFRRMVQRFHGAGIEVILDVVFNHTGEGDARGPVLSLRGLDNASYYRLTDRGAFINETGTGNTLDLSNPLCLRLVMDCLRYWVTEMGVDGFRFDLASTLARGVSGAVEPRSAFLSAITQDPVLSGVKLIAEPWDIGPGGYFLGGFPHPFCEWNDRFRDDLRKF…	K01214	ISA; isoamylase [EC:3.2.1.68]		20.5932	20.4303	19.9412	20.84	20.966	20.6848	20.5102	21.2071	20.5223	20.8831	21.1131	20.916	22.0316	21.3154	22.1914	20.3216	20.8302	20.7465	20.9707	21.8461	0.277074	0.115027	0.325722	0.101567	0.380927	0.00147707	0.00230538	0.00221419	0.00251285	0.013299	0.508663	0.424937	0.649163	1.52453			+	+	0.0745299	0.232633	0.0358382	0.0102053	-0.0837267	0.1405	1.01587
DMKJLJHC_01303 Phosphoglucomutase	MTRHATTPIDGQKPGTSGLRKKTKVFMEPGYLENFVQATFDAIGGLAGKTLVLGGDGRYFGAQAAATICKMAAANGAARLIVGQGAWLSTPAASHLIRKRGADGGLILSASHNPGGPDADFGVKYNMANGGPAPESVTSAIYARTQEITEYHILDAADPDLQSVGETRLGETVLEVIDPVSDYADMMESIFDFKALKTVFQSGFRMRMDSMCAITGPYAVEILERRLGAPSGTVSHETPLPDFGGMHPDPNPTWAHELMTEMMGSGAPDFGAASDGDGDRNMVVGAGIYVSPSDSLAVLAANAHLVPGYSAGLKGVARSMPTSAAVDRVAAETGLDCYETPTGWKFFGNLMDAGRVSLCGEESFGTGSDHVREKDGLWAVLMWLNILAVRKMSVTEVMA…	K01835	pgm; phosphoglucomutase [EC:5.4.2.2]		25.3348	25.3657	25.3034	25.4474	25.308	25.2739	25.2289	25.2571	25.3562	25.1391	25.4765	25.5549	24.3905	21.3519	21.9407	25.3346	25.3431	25.2808	25.3902	22.561	0.0254464	0.075083	0.0545873	0.180404	1.31581	0.0476951	0.0526309	0.0513043	0.0537712	0.0218287	0.00847333	-0.05386	0.0555767	-2.77359				+	0.887171	0.274642	0.688408	0.0407202	-0.0623333	0.0471033	-2.78207
DMKJLJHC_01304 Ribulose-phosphate 3-epimerase	MSFDRSIKIAPSILSADFANFGAEIRAIEAQGADWVHVDVMDGHFVPNLTFGPPAVKAFRPHVKTVMDVHLMIAPVDPYIEAYAEAGADMITAHVEAGPHIHRTLQAIKAQGVKAGVALNPGTPAEAVADVLDLCDMVLVMTVNPGFGGQKFIHSGIEKTRKVRAMIGDRPIHIQIDGGVTPETAPLVAEAGADVLVAGSAVFKGGSVDRADIYGDNIRAIRAAAEAARSN	K01783	rpe; ribulose-phosphate 3-epimerase [EC:5.1.3.1]		23.5867	23.3149	23.4045	23.4266	23.6473	23.4387	23.8774	23.8759	20.7279	23.3708	23.5574	23.7463	22.1139	23.1046	21.4718	23.4354	23.5042	22.827	23.5582	22.2301	0.113078	0.101319	1.48433	0.15331	0.671603	0.0127862	0.0147127	0.00936506	0.0151028	0.0173544	0.0688767	-0.608323	0.12282	-1.20526					0.55608	0.594296	0.413467	0.0665724	-0.6772	0.0539433	-1.27414
DMKJLJHC_01309 Elongation factor Ts	MAITAAQVKELRESTGAGMMDAKKALTETDGDMDAAVDWLRTKGLAKAAKKSGRVAAEGLVAVAVNDGKGVAIEVNSETDFVAKNADFQKLVGEIADLALQTGEDVEVLKATHLNGKTVEDVLTDAIARIGENMTLRRMHVLEGDTLVHYVHNAATDGMGKIGVLVALNGADNGIGKQIAMHIAATNPAALSQADLDPEVVEKEKAVQMDIARESGKPEAVIEKMIEGRMKKFVAEVTLLNQAFVVNPDLTVAEAAKEAGVEVTGFVRMEVGDGIEKKEEDFAAEVAKTAAGK	K02357	tsf; elongation factor Ts		27.8827	27.8573	27.9209	26.9413	26.865	26.8185	27.4125	27.6136	27.5134	26.9304	27.0694	27.0843	27.0574	24.8557	26.6182	27.8869	26.8749	27.5132	27.028	26.1771	0.0261431	0.0506424	0.0821274	0.0692711	0.95145	0.27977	0.152187	0.241089	0.167335	0.267657	-1.01199	-0.373777	-0.858917	-1.70983	+	+	+		1.49302e-05	0.00358201	8.08118e-05	0.0639471	0.638217	0.153077	-0.69784
[truncated: 941 more rows]
[truncated: 15 more columns]

## Sheet: Thioclava Exo
Table S10B: Protein categories of Thioclava sp. BHET1 proteins detected in the extracellular proteome when grown with fructose (positive control), terephthalic acid (TPA), bis(2-hydroxy ethyl) terephthalate (BHET) and amorphous polyethylene terephthalate (PET) pieces.
[truncated: 326 more rows]

[truncated: 2 more sheets: Bacillus Cellular Perseus, Bacillus Exo Perseus]
